# Supplementary material
Source: PubMed Central journal article supplement (PMC9633427)
Supplement: NIHMS1830997-supplement-1830997_Sup_Info_File.pdf [file NIHMS1830997-supplement-1830997_Sup_Info_File.pdf]

# Total synthesis of structurally-diverse pleuromutilin antibiotics.

Olivia Goethe,<sup>1</sup> Mikaela DiBello,<sup>1</sup> and Seth B. Herzon\*<sup>1,2</sup>

<sup>1</sup> Department of Chemistry, Yale University, New Haven, Connecticut 06520, United States.

<sup>2</sup> Department of Pharmacology, Yale School of Medicine, New Haven, Connecticut 06520, United States.

\*seth.herzon@yale.edu

*Nature Chemistry*

Supporting Information

## Index:

|                                                                     |      |
|---------------------------------------------------------------------|------|
| Supplementary figures and tables.....                               | S2   |
| General experimental procedures .....                               | S7   |
| Materials.....                                                      | S7   |
| Instrumentation .....                                               | S7   |
| Methods for measuring minimum inhibitory concentrations (MICs)..... | S8   |
| Test organisms.....                                                 | S8   |
| Test media.....                                                     | S9   |
| Broth microdilution susceptibility testing.....                     | S9   |
| Synthetic procedures.....                                           | S10  |
| Crystallographic analysis of the enone <b>S3</b> .....              | S159 |
| Crystallographic analysis of the cyanoester <b>19</b> .....         | S161 |
| Crystallographic analysis of the diol <b>26</b> .....               | S163 |
| Crystallographic analysis of the cyanoester <b>S20</b> .....        | S165 |
| Crystallographic analysis of the cyanoester <b>S35</b> .....        | S167 |
| Catalog of nuclear magnetic resonance spectra .....                 | S169 |
| Bibliography .....                                                  | S419 |

Supplementary tables and figures.

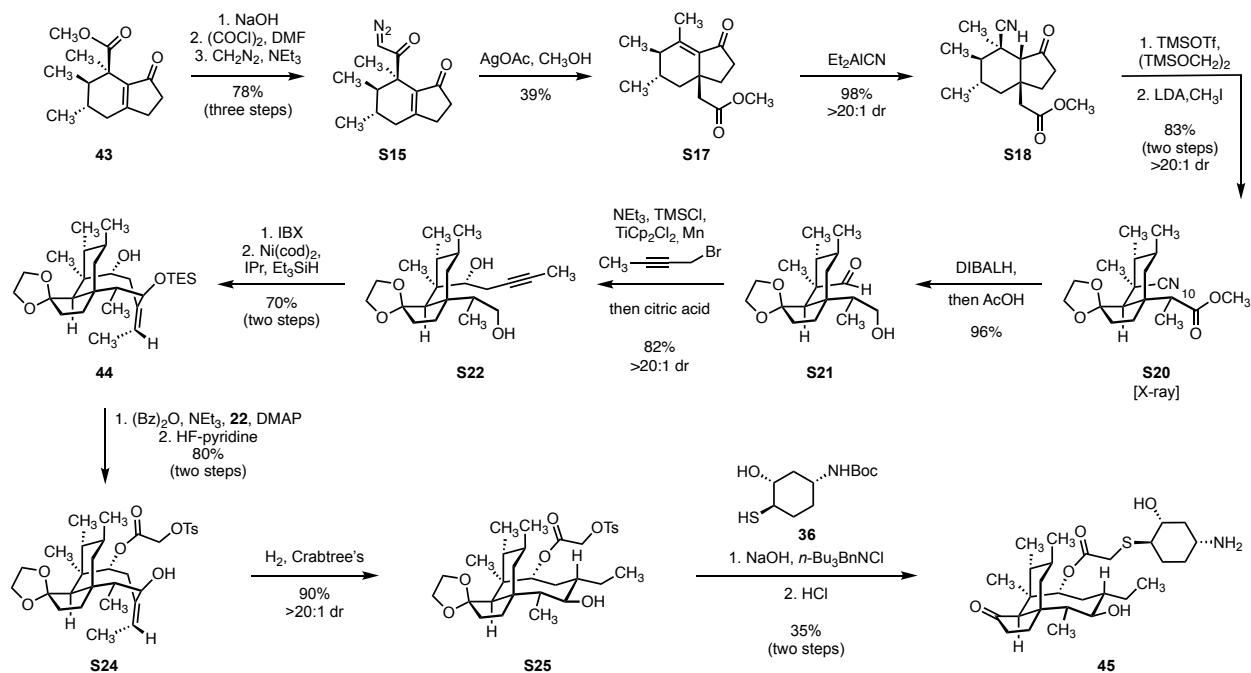

Figure S1. Preparation of the C7-substituted analog **45**.

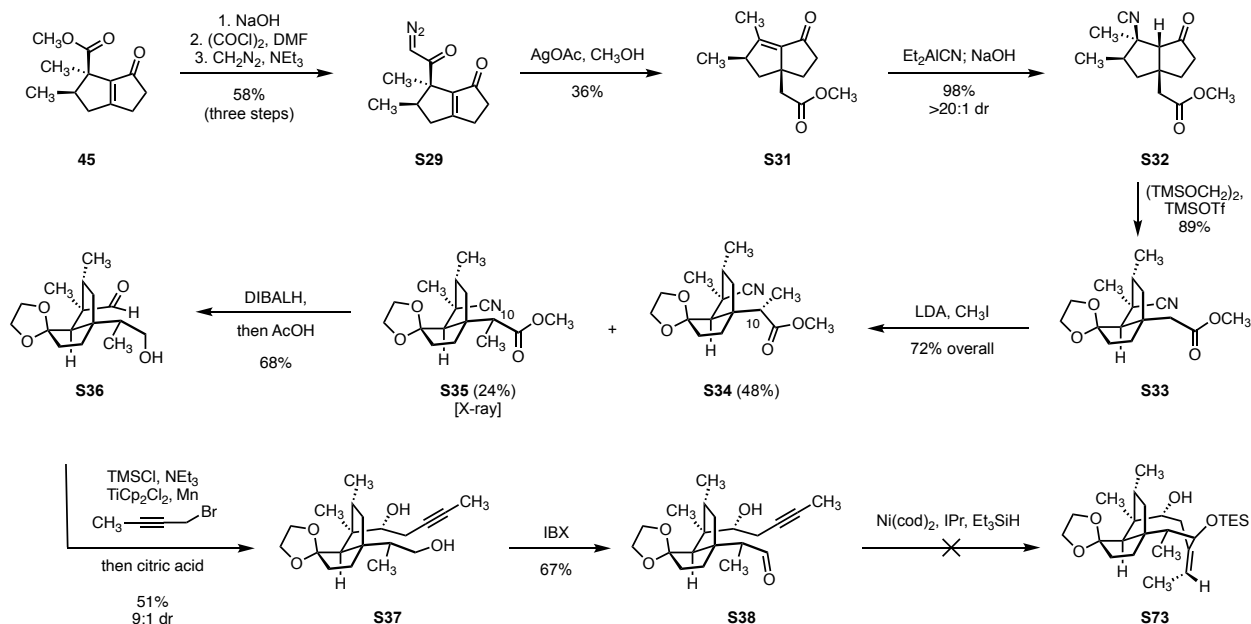

Figure S2. Preparation of the ring-contracted cyclization precursor **S38** and attempted ring closure.



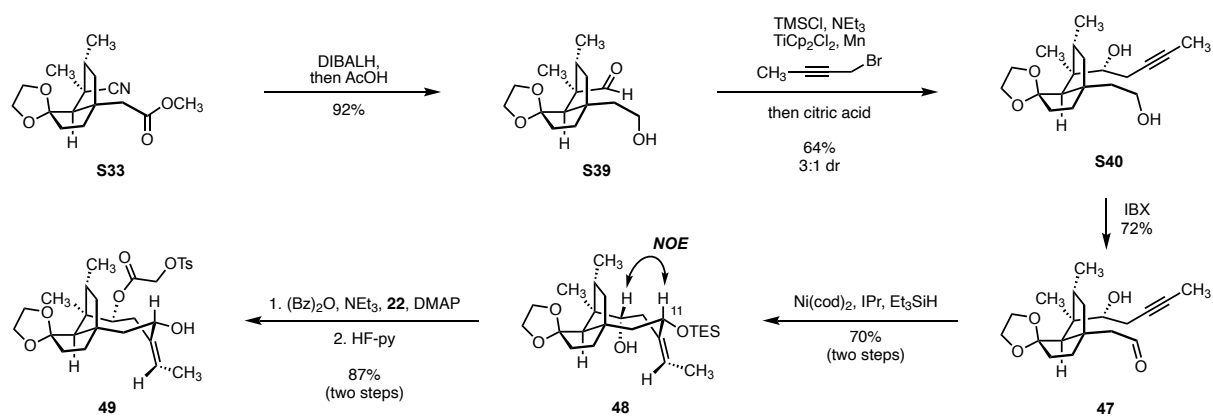

**Figure S3.** Elaboration of the C10 normethyl cyanoester **S33** to the tosylate **49**.

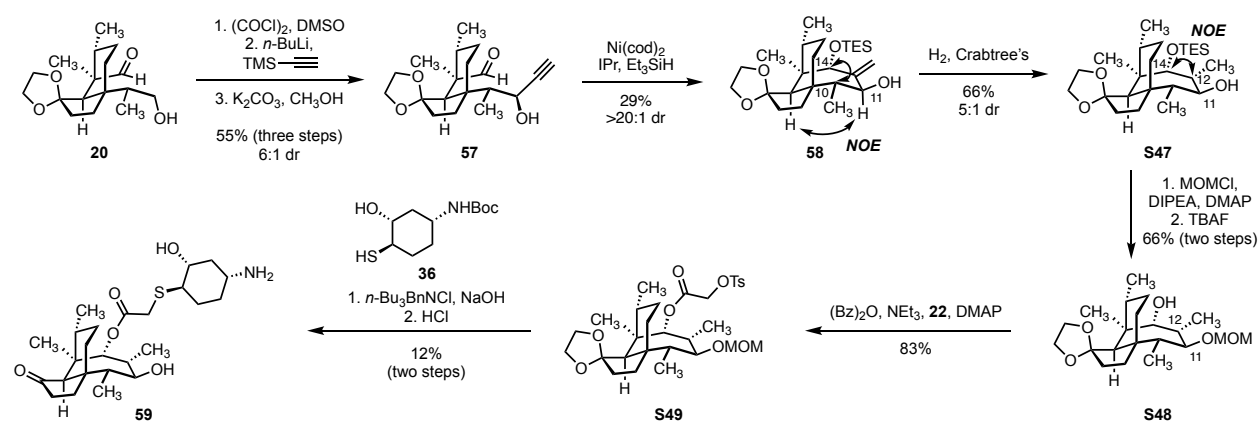

**Figure S4.** Synthesis of the seven-membered ring derivative **59** from the common precursor **20**.

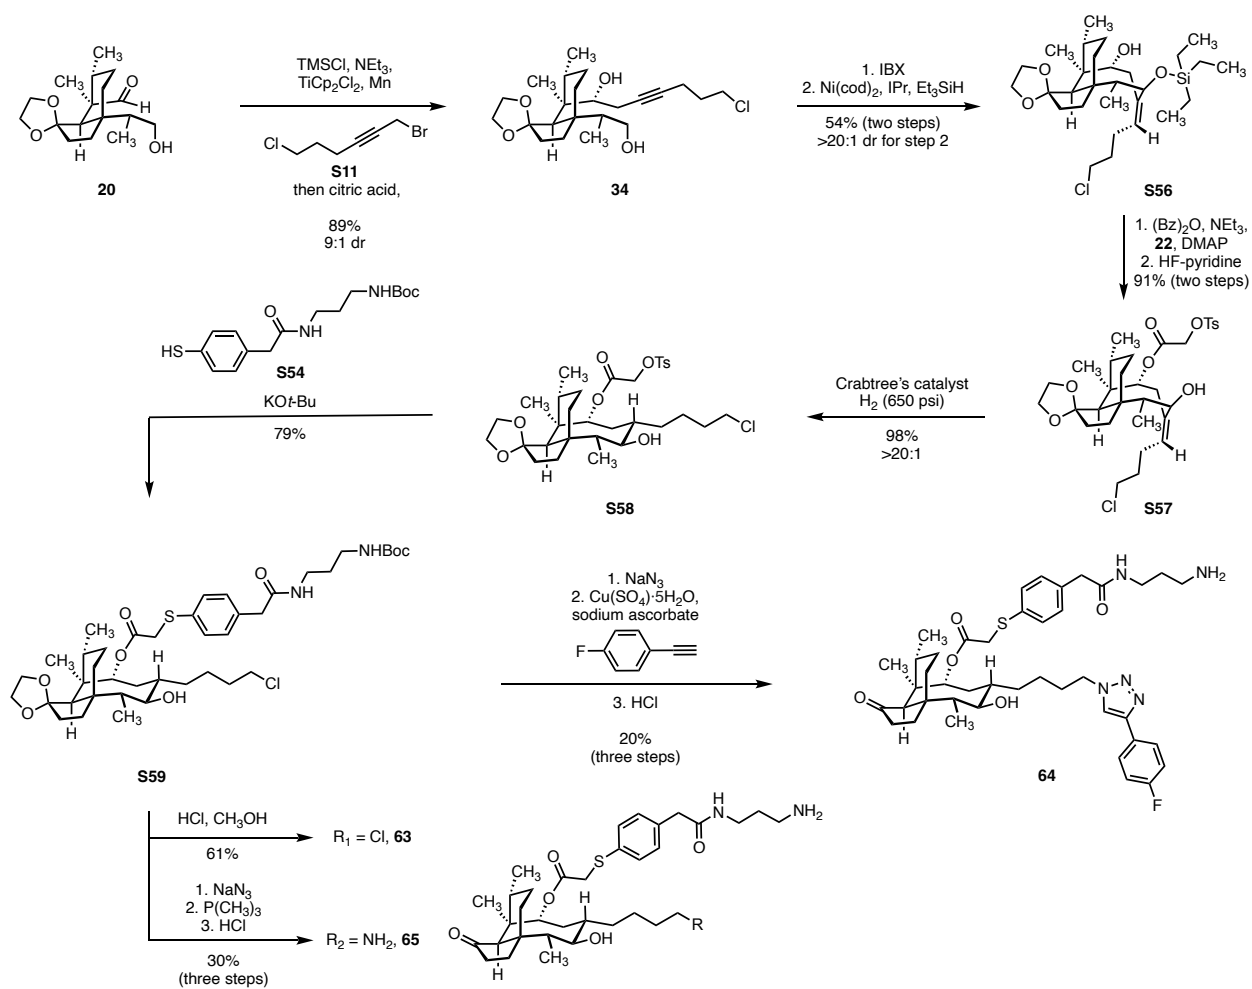

**Figure S5.** Preparation of the analogs **63**, **64** and **65** from the common precursor **20**.

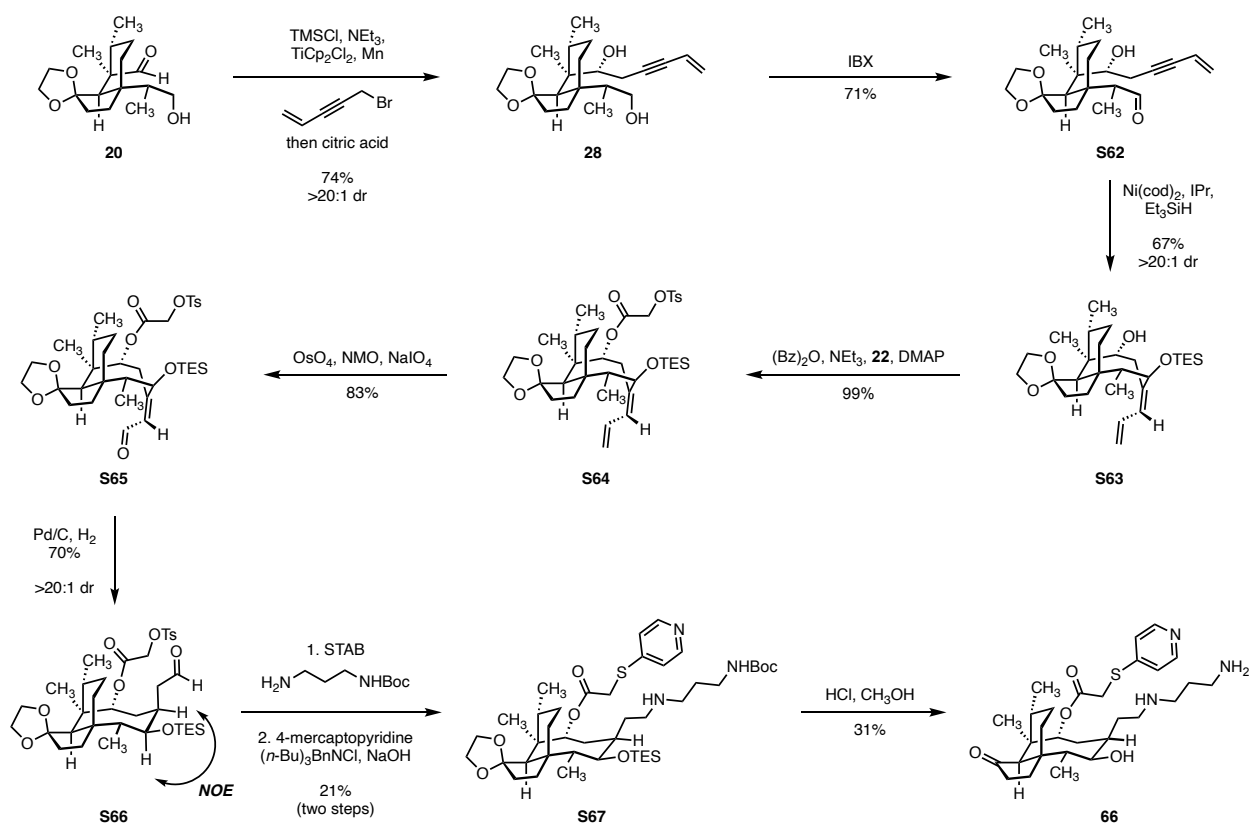

**Figure S6.** Synthesis of the analog **66** from the common precursor **20**.

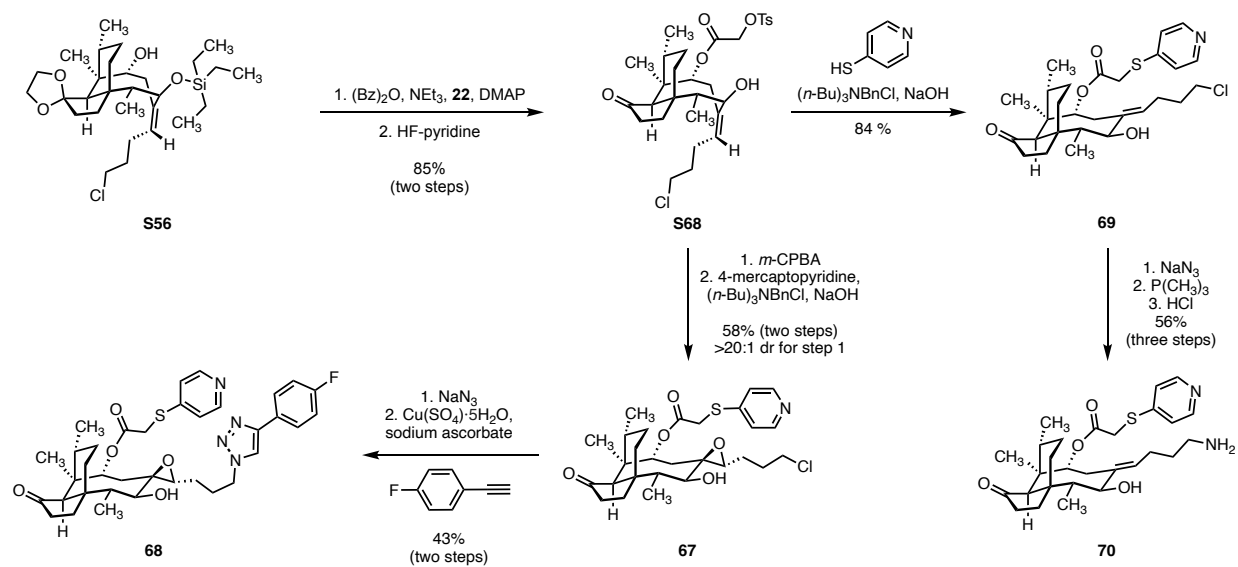

**Figure S7.** Preparation of the C12 modified analogs **67**, **68**, **69** and **70** from the macrocyclization product **S56**.

**Table S1.** Optimization of the butynylation of **20**.<sup>a</sup>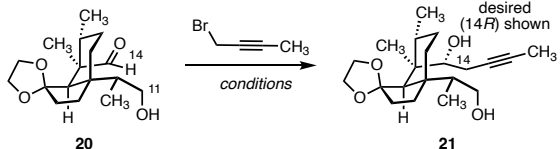

| entry | conditions                                                                                            | yield <sup>b</sup> | dr (R:S) <sup>c</sup> |
|-------|-------------------------------------------------------------------------------------------------------|--------------------|-----------------------|
| 1     | Mg, ether                                                                                             | 30%                | 1:3                   |
| 2     | Mg, glyme                                                                                             | 33%                | 1:1.5                 |
| 3     | TiCp <sub>2</sub> Cl <sub>2</sub> (1.0 equiv), Mn, collidine, TMSCl                                   | 21%                | >20:1                 |
| 4     | TiCp <sub>2</sub> Cl <sub>2</sub> (3.0 equiv), Mn, NEt <sub>3</sub> , TMSCl (dilute with citric acid) | 46%                | >20:1                 |
| 5     | TiCp <sub>2</sub> Cl <sub>2</sub> (3.0 equiv), Mn, NEt <sub>3</sub> , TMSCl (reverse addition)        | 81%                | 37:1                  |

<sup>a</sup>General reaction conditions: **20** (33.7 μmol), TMSCl (1.00 equiv), collidine or NEt<sub>3</sub> (2.00 equiv), TiCp<sub>2</sub>Cl<sub>2</sub> (3.00 equiv), Mn (12.0 equiv), propargyl bromide (3.50 equiv), THF (40 mM), 22 °C, 3h. <sup>b</sup>Isolated yields of **21** after purification by flash-column chromatography. <sup>c</sup>Determined by <sup>1</sup>H NMR spectroscopy of the unpurified product mixture.

**General experimental procedures.** All reactions were performed in single-neck, flame-dried, round-bottomed flasks fitted with rubber septa under a positive pressure of argon unless otherwise noted. Air- and moisture-sensitive liquids were transferred via syringe or stainless-steel cannula, or were handled in a nitrogen-filled drybox (working oxygen level <10 ppm). Organic solutions were concentrated by rotary evaporation at 28–32 °C. Flash-column chromatography was performed as described by Still et al.,<sup>1</sup> employing silica gel ('SiliaFlash® P60', 60 Å, 40–63 µm particle size) purchased from SiliCycle (Québec, Canada). Analytical thin-layered chromatography (TLC) was performed using glass plates pre-coated with silica gel (250 µm, 60 Å pore size) impregnated with a fluorescent indicator (254 nm). TLC plates were visualized by exposure to ultraviolet light (UV) and/or submersion in aqueous ceric ammonium molybdate solution (CAM), *p*-anisaldehyde (PAA), or aqueous potassium permanganate solution (KMnO<sub>4</sub>), followed by brief heating on a hot plate (120 °C, 10–15 s).

**Materials.** Commercial solvents and reagents were used as received with the following exceptions. Dichloromethane, diethyl ether (ether), *N,N*-dimethylformamide, tetrahydrofuran, and toluene were purified according to the method of Pangborn et al.<sup>2</sup> Triethylamine was distilled from calcium hydride immediately prior to use. Di-*iso*-propylethylamine was distilled from calcium hydride and stored in a round-bottomed flask fused to a Teflon-coated valve under an atmosphere of argon. The molarities of *n*-butyllithium and methyllithium solutions were determined by titration against a standard solution of menthol and 1,10-phenanthroline in tetrahydrofuran (average of three determinations).<sup>3</sup> Trimethylsilyl trifluoromethanesulfonate was purified by vacuum distillation and stored in a round-bottomed flask fused to a Teflon-coated valve under an atmosphere of argon at –20 °C. Triethylsilane were purified by fractional distillation and stored in a round-bottomed flask fused to a Teflon-coated valve under an atmosphere of argon. Diazomethane,<sup>4</sup> 2-iodoxybenzoic acid,<sup>5</sup> (1-but-2-ynyl)magnesium bromide,<sup>6</sup> diethyl allyl phosphate,<sup>7</sup> 6-bromohex-1-en-4-yne,<sup>8</sup> pent-4-en-2-yn-1-ol,<sup>9</sup> 2-((5-bromopent-3-yn-1-yl)oxy)tetrahydro-2*H*-pyran,<sup>10</sup> 1-(allyloxy)-4-bromobut-2-yne,<sup>11</sup> the hydrindenone **6**,<sup>12</sup> *O*-(tosyloxy)acetic acid (**22**),<sup>13</sup> *tert*-butyl-((1*R*,3*R*,4*R*)-3-hydroxy-4-mercaptocyclohexyl) carbamate (**36**),<sup>14</sup> the β-keto ester **38**,<sup>15</sup> pleuromutilin-22-*O*-tosylate (**S1**),<sup>14</sup> 4-(trimethylsilyl)but-2-yn-1-ol (**S8**),<sup>17</sup> 6-chlorohex-2-yn-1-ol (**S10**),<sup>18</sup> *O*-[(*tert*-butyldiphenyl)-silyl]-12-*epi*-pleuromutilin (**S51**),<sup>16</sup> (+)-12-*epi*-pleuromutilin (**S52**),<sup>16</sup> and *tert*-butyl (3-(2-(4-mercaptophenyl)acetamido)propyl) carbamate (**S54**)<sup>19</sup> were prepared according to published procedures. (+)-Pleuromutilin (**1**) was purchased from Toronto Research Chemicals.

**Instrumentation.** Proton nuclear magnetic resonance spectra (<sup>1</sup>H NMR) were recorded at 400, 500, or 600 megahertz (MHz) at 23 °C, unless otherwise noted. Chemical shifts are expressed in parts per million (ppm, δ scale) downfield from tetramethylsilane and are referenced to residual protium in the NMR solvent (CHCl<sub>3</sub>, δ 7.26; C<sub>6</sub>D<sub>5</sub>H, δ 7.16; CD<sub>2</sub>HOD, δ 3.31; DHO, δ 4.79; C<sub>2</sub>D<sub>6</sub>OS, δ 2.50). Data are represented as follows: chemical shift, multiplicity (s = singlet, d = doublet, t = triplet, q = quartet, m = multiplet and/or multiple resonances, b = broad, app = apparent), coupling constant in Hertz (Hz), integration, and assignment. Proton-decoupled carbon nuclear magnetic resonance spectra (<sup>13</sup>C NMR) were recorded at 100, 125, or 150 MHz at 23 °C, unless otherwise noted. Chemical shifts are expressed in parts per million (ppm, δ scale) downfield from tetramethylsilane and are referenced to the carbon resonances of the solvent (CDCl<sub>3</sub>, δ 77.0; C<sub>6</sub>D<sub>6</sub>, δ 128.1; CD<sub>3</sub>OD, δ 49.0). Distortionless enhancement by polarization transfer [DEPT (135)], heteronuclear single quantum coherence (HSQC), and heteronuclear multiple bond

correlation (HMBC) spectra were recorded at 125 or 150 MHz at 23 °C, unless otherwise noted. <sup>13</sup>C NMR and DEPT (135)/HSQC data are combined and represented as follows: chemical shift, carbon type [obtained from DEPT (135) or HSQC experiments]. Proton-decoupled fluorine nuclear magnetic resonance (<sup>19</sup>F NMR) spectra were recorded at 376 or 470 MHz at 23 °C. <sup>19</sup>F NMR data are represented as follows: chemical shift. Two-dimensional nuclear Overhauser effect spectroscopy (2D NOESY) experiments were performed at 500 MHz at 23 °C, unless otherwise noted. Attenuated total reflectance Fourier transform infrared (ATR-FTIR) spectra were obtained using a Thermo Electron Corporation Nicolet 6700 FTIR spectrometer referenced to a polystyrene standard. Data are represented as follows: frequency of absorption (cm<sup>-1</sup>), intensity of absorption (s = strong, m = medium, w = weak, br = broad). Analytical ultra-high-performance liquid chromatography/mass spectrometry (UPLC/MS) was performed on a Waters UPLC/MS instrument equipped with a reverse-phase C<sub>18</sub> column (1.7 μm particle size, 2.1 × 50 mm), dual atmospheric pressure chemical ionization (API)/electrospray (ESI) mass spectrometry detector, and photodiode array detector. Samples were eluted with a linear gradient of 5% acetonitrile–water containing 0.1% formic acid→100% acetonitrile containing 0.1% formic acid over 0.75 min, followed by 100% acetonitrile containing 0.1% formic acid for 0.75 min, at a flow rate of 800 μL/min. High-resolution mass spectrometry (HRMS) were obtained on a Waters UPLC/HRMS instrument equipped with a dual API/ESI high-resolution mass spectrometry detector and photodiode array detector. Unless otherwise noted, samples were eluted over a reverse-phase C<sub>18</sub> column (1.7 μm particle size, 2.1 × 50 mm) with a linear gradient of 5% acetonitrile–water containing 0.1% formic acid→95% acetonitrile–water containing 0.1% formic acid for 1 min, at a flow rate of 600 μL/min. Optical rotations were measured on a Rudolph Research Analytical Autopol IV polarimeter equipped with a sodium (589 nm, D) lamp. Optical rotation data are represented as follows: specific rotation ( $[\alpha]_{\lambda}^T$ ), concentration (g/mL), and solvent.

**Methods for measuring minimum inhibitory concentrations (MICs).** MICs were determined by Micromyx LLC (Kalamazoo, MI) using the broth microdilution method as recommended by the Clinical and Laboratory Standards Institute (CLSI).<sup>20-21</sup> The test agents and lefamulin were provided by Yale University and were stored at -20 °C prior to use. The comparator compound and quality control agent levofloxacin (Sigma 28266, Lot No. BCBF7004V) was supplied by Micromyx. The mass of the test agents was determined by quantitative <sup>1</sup>H NMR analysis using (1,3,5-trimethyl)benzene as an internal standard. Stock solutions of all compounds were prepared on the day of testing. The compounds were dissolved in 100% DMSO (Sigma 472301) to a stock concentration of 40X the final testing concentration (640 μg/mL or 1280 μg/mL). Lefamulin, was dissolved in 50% DMSO due to insolubility in water, as recommended by the CLSI guidelines.<sup>21</sup> The concentration range evaluated for each of the compounds was 32–0.03 μg/mL or 16–0.015 μg/mL.

**Test organisms.** The test organisms evaluated in this study consisted of clinical isolates from the Micromyx Repository (MMX; Kalamazoo, MI) and reference isolates from the American Type Culture Collection (ATCC; Manassas, VA). Upon initial receipt at Micromyx, the organisms were sub-cultured onto an appropriate agar medium. Following incubation, colonies were harvested from these plates and cell suspensions prepared and frozen at -80 °C with a cryoprotectant. Prior to testing, the isolates were streaked from frozen vials onto trypticase soy agar with 5% sheep blood (Becton Dickenson BD/BBL; Sparks, MD, Lot No. 1057393) and incubated at 37 °C for 24

hr. *Haemophilus influenzae* was streaked onto Chocolate Agar (BD; Lot No.1057195). Additionally, *Streptococcus pneumoniae* and *H. influenzae* were incubated in 5% carbon dioxide.

**Test media.** Cation-adjusted Mueller Hinton broth (CaMHB II; BD; Lot No. 0286591) was used for MIC testing of aerobic organisms. For *Streptococcus* isolates, this medium was supplemented with 3% laked horse blood (LHB; Hemostat, Dixon, CA; Lot No. 474990). MIC testing of *H. influenzae* was performed in Haemophilus Test Medium Broth (HTM) which was made by supplementing CaMHB with 15 µg/mL nicotinamide adenine dinucleotide (NAD; Sigma; St. Louis, MO; Lot. No. SLBX4629), 15 µg/mL porcine hematin (Sigmas; Lot. No. SLBD4979V), and 5 g/L yeast extract (Sigma; Lot. No. 7179579).

**Broth microdilution susceptibility testing.** MIC values were determined using a broth microdilution procedure described by CLSI.<sup>20-21</sup> Automated liquid handlers (Biomek 3000 and Biomek FX, Beckman Coulter, Fullerton CA) were used to conduct serial dilutions and liquid transfers. All wells in column 2 through 12 of a standard 96-well microdilution plate (Costar 3795) were filled with 150 µL of the appropriate diluent. Then, 300 µL of the tested agents were added to the wells of column 1 of the plates at 40X the highest final concentration to be tested. Serial two-fold dilutions were made across the rows through column 11 using the Biomek 3000. The wells of column 12 contained no testing agent and served as the growth control wells. This plate served as the “mother plate” from which MIC assay plates or “daughter plates” were made. The daughter plates were loaded with 185 µL per well of the appropriate test medium for the tested organism using the Biomek FX or by hand. The daughter plates were completed on the Biomek FX instrument which transferred 5 µL of tested agent solution from each well of a mother plate to the corresponding well of each daughter plate in a single step. Due to volume constraints, a few daughter plates were created by transferring 5 µL from the mother plate by hand with a multichannel pipet. A standardized inoculum of each test organism was prepared per CLSI methods.<sup>20-21</sup> The inoculum for each organism was dispensed into sterile reservoirs divided by length (Beckman Coulter), and the Biomek 3000 was used to inoculate the plates. Daughter plates were placed on the Biomek 3000 work surface in reverse orientation so that inoculation took place from low to high drug concentration. Daughters were then inoculated with 10 µL of the inoculum resulting in a final cell density of approximately  $5 \times 10^5$  CFU/mL. Plates were stacked 3–4 high, covered with a lid on the top plate, placed in plastic bags, and incubated at 35 °C for approximately 20 h. Following incubation, the microplates were removed from the incubator and viewed from the bottom using a plate viewer. For each test media and each drug, an un-inoculated solubility control plate was observed for evidence of tested agent precipitation. The MIC was read and recorded as the lowest concentration of drug that inhibited visible growth of the organism. The MIC values for lefamulin and levofloxacin were within CLSI established QC ranges,<sup>21</sup> thus validating the study.

## Synthetic procedures.

### *Synthesis of pleuromutilin-22-O-tosylate (S1).*

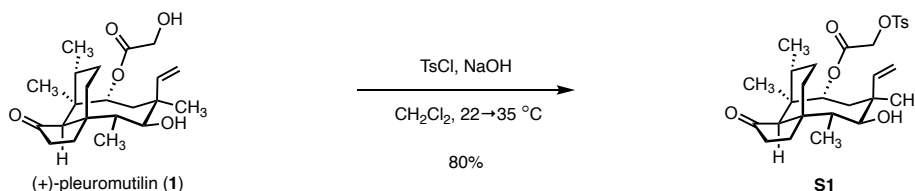

Aqueous sodium hydroxide solution (5.7 N, 204 mL, 1.16 mmol, 1.10 equiv) was added in one portion to a solution of tosyl chloride (202 mg, 1.06 mmol, 1.00 equiv) and (+)-pleuromutilin (**1**) (400 mg, 1.06 mmol, 1 equiv) in dichloromethane (1.6 mL) at 22 °C. The reaction vessel was transferred to an oil bath that had been preheated to 35 °C. The reaction mixture was stirred and heated for 16 h at 35 °C. The product mixture was cooled to 22 °C over 20 min. The cooled product mixture was diluted sequentially with ether (3.0 mL) and saturated aqueous ammonium chloride solution (2.0 mL). The resulting biphasic mixture was transferred to a separatory funnel and the layers that formed were separated. The aqueous layer was extracted with ether (2 × 2.0 mL). The organic layers were combined and the combined organic layers were dried over magnesium sulfate. The dried solution was filtered, and the filtrate was concentrated. The residue obtained was purified by flash-column chromatography (eluting with 10% ethyl acetate–hexanes initially, grading to 60% ethyl acetate–hexanes, four steps) to provide the pleuromutilin-22-O-tosylate **S1** as a white foam (450 mg, 80%).

Spectroscopic data for the pleuromutilin-22-O-tosylate **S1** obtained in this way were identical to those previously reported.<sup>14</sup>

<sup>1</sup>H NMR (500 MHz, C<sub>2</sub>D<sub>6</sub>OS) δ 7.81 (d, *J* = 8.2 Hz, 2H), 7.47 (d, *J* = 8.1 Hz, 2H), 6.05 (dd, *J* = 17.7, 11.3 Hz, 1H), 5.53 (d, *J* = 8.4 Hz, 1H), 5.09 – 4.97 (m, 2H), 4.77 (d, *J* = 16.2 Hz, 1H), 4.64 (d, *J* = 16.3 Hz, 1H), 3.40 (d, *J* = 5.9 Hz, 1H), 2.41 (s, 4H), 2.28 (s, 1H), 2.18 (dd, *J* = 19.4, 11.3 Hz, 1H), 2.09 (t, *J* = 9.3 Hz, 1H), 2.06 – 1.96 (m, 2H), 1.61 (dt, *J* = 20.1, 12.5 Hz, 2H), 1.49 – 1.40 (m, 1H), 1.31 (s, 3H), 1.26 – 1.18 (m, 4H), 1.03 (s, 4H), 0.81 (d, *J* = 6.9 Hz, 3H), 0.50 (d, *J* = 7.1 Hz, 3H).



### Synthesis of lefamulin (4).

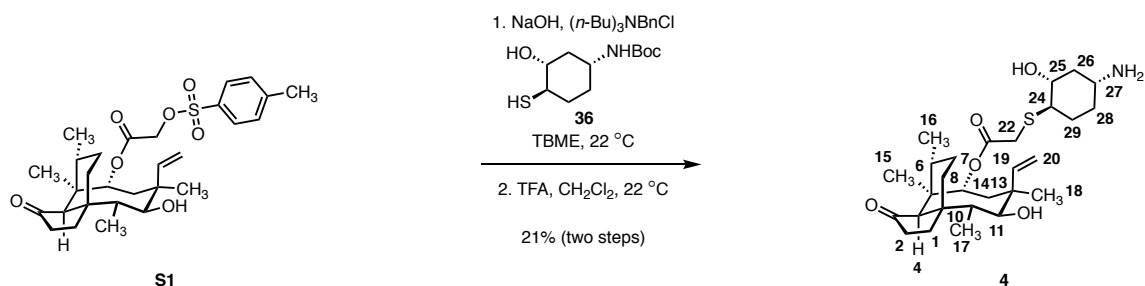

Aqueous sodium hydroxide solution (1 N, 49.0  $\mu$ L, 48.8  $\mu$ mol, 1.30 equiv) was added to a solution of the thiol **36** (12.1 mg, 48.8  $\mu$ mol, 1.30 equiv), benzyl tri-*n*-butylammonium chloride (2.30 mg, 7.50  $\mu$ mol, 0.20 equiv), and pleuromutilin-22-*O*-tosylate (**S1**, 20.0 mg, 37.5  $\mu$ mol, 1 equiv) in *tert*-butyl methyl ether (380  $\mu$ L) at 22 °C. The reaction mixture was stirred for 5 h at 22 °C. The product mixture was diluted sequentially with ethyl acetate (3.0 mL) and 1 N aqueous sodium hydroxide solution (1.0 mL). The resulting biphasic mixture was transferred to a separatory funnel and the layers that formed were separated. The aqueous layer was extracted with ethyl acetate (3  $\times$  2.0 mL). The organic layers were combined and the combined organic layers were washed sequentially with 0.1 N aqueous phosphoric acid solution (3.0 mL), saturated aqueous sodium bicarbonate solution (3.0 mL), and saturated aqueous sodium chloride solution (3.0 mL). The washed organic layer was dried over magnesium sulfate. The dried solution was filtered and the filtrate was concentrated. The residue obtained was eluted over a plug of silica gel (1.0 cm  $\times$  1.0 cm, eluting with 80% ethyl acetate–hexanes). The filtrate was collected and concentrated. The residue obtained was used directly in the following step.

Trifluoroacetic acid (35.0  $\mu$ L, 461  $\mu$ mol, 16.0 equiv) was added to a solution of the displacement product obtained in the preceding step (nominally 48.8  $\mu$ mol, 1 equiv) in dichloromethane (300  $\mu$ L) at 22 °C. The reaction mixture was stirred for 4 h at 22 °C. The product mixture was diluted sequentially with dichloromethane (1.0 mL) and aqueous potassium carbonate solution (10% w/v, 1.0 mL). The resulting biphasic mixture was transferred to a separatory funnel and the layers that formed were separated. The aqueous layer was extracted with dichloromethane (2  $\times$  1.0 mL). The organic layers were combined and the combined organic layers were dried over magnesium sulfate. The dried solution was filtered, and the filtrate was concentrated to provide lefamulin (**4**) as a fine, white solid (4.00 mg, 21% over two steps).

$R_f$  = 0.05 (95% ethyl acetate–hexanes; PAA). <sup>1</sup>H NMR (400 MHz, CDCl<sub>3</sub>)  $\delta$  6.47 (dd,  $J$  = 17.4, 11.2 Hz, 1H, H<sub>19</sub>), 5.76 (dd,  $J$  = 8.5, 3.5 Hz, 1H, H<sub>14</sub>), 5.36 (d,  $J$  = 11.0 Hz, 1H, H<sub>20a</sub>), 5.21 (d,  $J$  = 17.4 Hz, 1H, H<sub>20b</sub>), 3.47 (td,  $J$  = 9.5, 3.7 Hz, 1H, H<sub>25</sub>), 3.36 (d,  $J$  = 6.4 Hz, 1H, H<sub>11</sub>), 3.35 – 3.22 (m, 1H, H<sub>22a</sub>), 3.21 (d,  $J$  = 15.6 Hz, 1H, H<sub>22b</sub>), 2.99 (t,  $J$  = 10.2 Hz, 1H, H<sub>27</sub>), 2.65 – 2.52 (m, 1H, H<sub>24</sub>), 2.39 – 2.03 (m, 7H, H<sub>2</sub>, H<sub>4</sub>, H<sub>10</sub>, H<sub>13a</sub>, H<sub>26a</sub>, H<sub>29a</sub>), 2.00 – 1.91 (m, 1H, H<sub>28a</sub>), 1.82 – 1.72 (m, 1H, H<sub>8a</sub>), 1.65 (q,  $J$  = 11.3, 10.6 Hz, 2H, H<sub>1a</sub>, H<sub>6</sub>), 1.59 – 1.23 (m, 10H, H<sub>1b</sub>, H<sub>7</sub>, H<sub>13b</sub>, H<sub>18</sub>, H<sub>26b</sub>, H<sub>28b</sub>, H<sub>29b</sub>), 1.17 (s, 4H, H<sub>8b</sub>, H<sub>15</sub>), 0.88 (d,  $J$  = 6.8 Hz, 3H, H<sub>17</sub>), 0.72 (d,  $J$  = 6.8 Hz, 3H, H<sub>16</sub>). <sup>13</sup>C NMR (100 MHz, CDCl<sub>3</sub>)  $\delta$  217.2 (C), 170.1 (C), 139.1 (CH), 117.5 (CH<sub>2</sub>), 74.8 (CH), 71.3 (CH), 70.0 (CH), 58.3 (CH), 51.9 (CH), 48.4 (CH), 45.6 (C), 45.0 (CH<sub>2</sub>), 44.1 (C), 41.9 (C), 40.6 (CH<sub>2</sub>), 36.9 (CH), 36.1 (CH), 34.6 (CH<sub>2</sub>), 33.5 (CH<sub>2</sub>), 33.1 (CH<sub>2</sub>), 30.5 (CH<sub>2</sub>), 28.1 (CH<sub>2</sub>), 27.0 (CH<sub>2</sub>), 26.5 (CH<sub>3</sub>), 25.0 (CH<sub>2</sub>), 17.0 (CH<sub>3</sub>), 15.0 (CH<sub>3</sub>), 11.7 (CH<sub>3</sub>). IR (ATR-FTIR), cm<sup>-1</sup>: 3435 (w),

2936 (m), 2163 (m), 1720 (s), 1697 (s), 1283 (m), 1167 (m), 755 (m). HRMS-ESI (m/z): [M + H]<sup>+</sup> calcd for [C<sub>28</sub>H<sub>46</sub>NO<sub>5</sub>S]<sup>+</sup> 508.3097; found 508.3099.  $[\alpha]_D^{20} = +15.5$  (*c* = 0.100, CHCl<sub>3</sub>).

### Synthesis of the $\alpha$ -methyl- $\beta$ -ketoester.

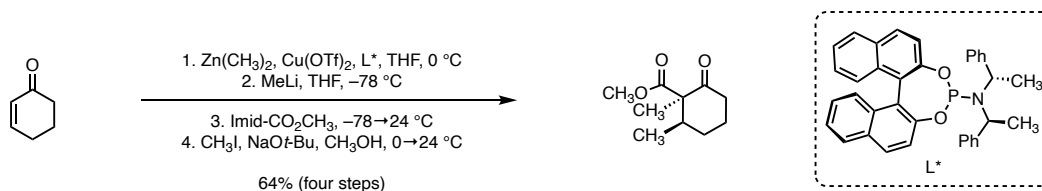

Copper(II) triflate (56.4 mg, 156  $\mu\text{mol}$ , 500 ppm) and (11bR)-*N,N*-bis[(*S*)-1-phenylethyl]dinaphtho(1,3,2)dioxaphosphepin-4-amine ( $\text{L}^*$ , 168 mg, 312  $\mu\text{mol}$ , 1000 ppm) were added to a 2 L three-neck round-bottom flask in a nitrogen-filled glovebox. The reaction vessel was sealed and the sealed reaction vessel was removed from the glovebox. The center septum was exchanged with a mechanical stir bar and the reaction vessel was equipped with an argon inlet and gas outlet in the remaining two septa. The reaction vessel was purged with a stream of argon for 30 min. Toluene (420 mL) was added to the reaction vessel via cannula and the resulting mixture was stirred for 1 h at  $24\text{ }^\circ\text{C}$ . The mixture was then cooled over 1 h to  $0\text{ }^\circ\text{C}$ . Cyclohex-2-en-1-one (30.2 mL, 312  $\mu\text{mol}$ , 1 equiv) was added dropwise to the catalyst mixture at  $0\text{ }^\circ\text{C}$ . The resulting mixture was stirred for 1 h at  $0\text{ }^\circ\text{C}$ . A solution of dimethylzinc in toluene (1.2 M, 281 mL, 337  $\mu\text{mol}$ , 1.08 equiv) was then added dropwise via syringe pump over 3 h into the reaction mixture at  $0\text{ }^\circ\text{C}$ . The resulting mixture was stirred for 36 h at  $0\text{ }^\circ\text{C}$ . The mixture was then cooled to  $-78\text{ }^\circ\text{C}$  over 2 h and stirred for an additional 2 h at this temperature. A solution of methyllithium in ether (1.6 M, 211 mL, 337  $\mu\text{mol}$ , 1.08 equiv) was then added dropwise via syringe pump over 1.5 h. Upon completion of the addition, the reaction mixture was stirred for 30 min at  $-78\text{ }^\circ\text{C}$ . A solution of methyl 1*H*-imidazole-1-carboxylate [49.2 g, 390  $\mu\text{mol}$ , 1.25 equiv; dried by azeotropic distillation from benzene (500 mL)] in toluene (90 mL) was then added dropwise via cannula over 30 min at  $-78\text{ }^\circ\text{C}$ . Upon completion of the addition, the cooling bath was removed, and the reaction mixture was allowed to warm to  $24\text{ }^\circ\text{C}$  over 6 h. Aqueous citric acid solution (10% w/w, 200 mL) was then added dropwise over 30 min to the product mixture. The diluted product mixture was transferred to a separatory funnel that had been charged with ether (500 mL). The layers that formed were separated and the aqueous layer was extracted with ether ( $5 \times 1.0\text{ L}$ ). The organic layers were combined and the combined organic layers were dried over sodium sulfate. The dried solution was filtered and the filtrate was concentrated to afford a brown residue that was used immediately in the next step.

Sodium *tert*-butoxide (60.0 g, 624  $\mu\text{mol}$ , 2.00 equiv) was added in one portion to a solution of iodomethane (97.1 mL, 1.56 mmol, 5.00 equiv) and the unpurified product obtained in the preceding step (nominally 312  $\mu\text{mol}$ , 1 equiv) in methanol (600 mL) at  $0\text{ }^\circ\text{C}$ . Upon completion of the addition the cooling bath was removed and the reaction mixture was allowed to warm to  $24\text{ }^\circ\text{C}$  over 2 h. The warmed reaction mixture was stirred for 48 h at  $24\text{ }^\circ\text{C}$ . The product mixture was diluted with aqueous acid solution (10% w/w, 200 mL). The diluted product mixture was transferred to a separatory funnel that had been charged with ether (500 mL). The layers that formed were separated and the aqueous layer was extracted with ether ( $5 \times 1.0\text{ L}$ ). The organic layers were combined and the combined organic layers were dried over sodium sulfate. The dried solution was filtered and the filtrate was concentrated. The residue obtained was purified by flash-column chromatography (eluting with hexanes initially, grading to 30% ether–hexanes, four steps) to afford the  $\alpha$ -methyl- $\beta$ -ketoester as a light-yellow oil (37.1 g, 64%).

Spectroscopic data for the  $\alpha$ -methyl- $\beta$ -ketoester obtained in this way were identical to those previously reported.<sup>12</sup>

$R_f = 0.30$  (5% ethyl acetate–hexanes;  $\text{KMnO}_4$ ).  $^1\text{H}$  NMR (400 MHz,  $\text{CDCl}_3$ )  $\delta$  3.69 (s, 3H), 2.72 (td,  $J = 14, 6.8$  Hz, 1H), 2.47 – 2.39 (m, 1H), 2.08 – 1.97 (m, 1H), 1.97 – 1.83 (m, 1H), 1.72 – 1.58 (m, 3H), 1.34 (s, 3H), 1.14 (d,  $J = 6.4$  Hz, 3H).  $^{13}\text{C}$  NMR (126 MHz,  $\text{CDCl}_3$ )  $\delta$  208.2, 171.7, 60.8, 51.8, 43.7, 39.7, 30.1, 25.3, 18.7, 16.9.

### Synthesis of the methyl ester **6**.

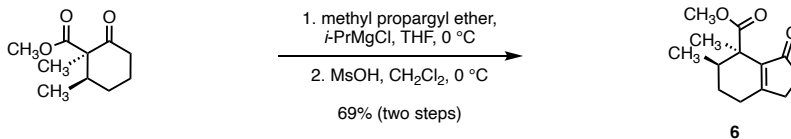

A solution of *iso*-propylmagnesium chloride in tetrahydrofuran (2.0 M, 120 mL, 240 mmol, 1.30 equiv) was added dropwise over 20 min to a solution of methyl propargyl ether (20.3 mL, 240 mmol, 1.30 equiv) in tetrahydrofuran (250 mL) under argon at 0 °C. The resulting mixture was stirred for 20 min at 0 °C. The resulting alkynyl Grignard solution was added dropwise into a solution of the  $\alpha$ -methyl- $\beta$ -ketoester (34.0 g, 185 mmol, 1 equiv) in tetrahydrofuran (750 mL) at 0 °C. The resulting mixture was stirred for 30 min at 0 °C. The cold product mixture was diluted with saturated aqueous ammonium chloride solution (600 mL). The resulting biphasic mixture was stirred for 10 min at 0 °C. The cooling bath was removed, and the product mixture was allowed to warm to 24 °C over 30 min. The warmed product mixture was transferred to a separatory funnel that had been charged with ether (500 mL). The layers that formed were separated and the aqueous layer was extracted with ether (5  $\times$  1.0 L). The organic layers were combined and the combined organic layers were dried over sodium sulfate. The dried solution was filtered and the filtrate was concentrated. The residue obtained was used immediately in the next step.

Methanesulfonic acid (60.0 mL, 923 mmol, 5.00 equiv) was added dropwise over 20 min to a solution of the unpurified propargyl ether obtained in the preceding step (nominally 185 mmol, 1 equiv) in dichloromethane (170 mL) at 0 °C. Upon completion of the addition, the cooling bath was removed, and the reaction mixture was allowed to warm to 22 °C over 4 h. The product mixture was diluted sequentially with ether (200 mL) and water (200 mL). The diluted product mixture was cooled to 0 °C. The cooled product mixture was carefully basified with aqueous sodium hydroxide solution (10% w/w, 400 mL) at 0 °C. The resulting basified mixture was transferred to a separatory funnel and the layers that formed were separated. The aqueous layer was extracted with ether (3  $\times$  300 mL). The organic layers were combined and the combined organic layers were dried over sodium sulfate. The dried solution was filtered and the filtrate was concentrated. The residue obtained was purified by flash-column chromatography (eluting with hexanes initially, grading to 50% ether–hexanes, four steps) to afford the methyl ester **6** as an orange solid (31.0 g, 69% over two steps).

Spectroscopic data for the methyl ester **6** obtained in this way were identical to those previously reported.<sup>12</sup>

$R_f$  = 0.38 (30% ethyl acetate–hexanes; UV). <sup>1</sup>H NMR (600 MHz, CDCl<sub>3</sub>)  $\delta$  3.61 (s, 3H), 2.51 (t,  $J$  = 4.7 Hz, 2H), 2.42 – 2.27 (m, 4H), 1.72 – 1.62 (m, 3H), 1.41 (s, 3H), 0.90 (d,  $J$  = 6.4 Hz, 3H). <sup>13</sup>C NMR (151 MHz, CDCl<sub>3</sub>)  $\delta$  207.3, 174.3, 173.5, 140.9, 51.8, 45.5, 39.2, 34.8, 29.9, 27.8, 27.12, 21.5, 16.2.

### Synthesis of the carboxylic acid **S2**.

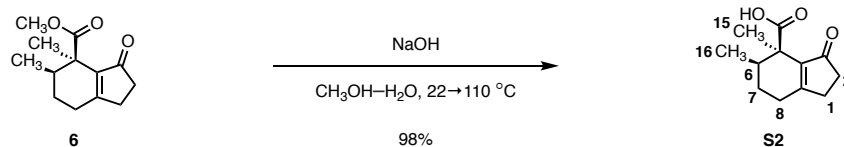

Aqueous sodium hydroxide solution (2N, 600 mL, 1.20 mol, 16.7 equiv) was added to a solution of the methyl ester **6** (16.0 g, 71.9 mmol, 1 equiv) in methanol (600 mL) at 22 °C. The reaction vessel was fitted with a reflux condenser and then placed in an oil bath that had been preheated to 110 °C. The reaction mixture was stirred for 15 h at 110 °C. The product mixture was cooled to 22 °C over 20 min. The cooled product mixture was diluted sequentially with water (600 mL) and ether (500 mL). The resulting biphasic mixture was transferred to a separatory funnel and the layers that formed were separated. The aqueous layer was extracted with ether (2 × 500 mL, discarded). The washed aqueous layer was cooled to 0 °C over 20 min. The cooled aqueous layer acidified to pH ~ 1 by the dropwise addition of 12 N concentrated hydrochloric acid solution over 20 min at 0 °C. The acidified aqueous phase was diluted with ether (500 mL) and the resulting biphasic mixture was transferred to a separatory funnel. The layers that formed were separated. The aqueous layer was extracted with ether (2 × 500 mL). The organic layers were combined and the combined organic layers were dried over sodium sulfate. The dried solution was filtered and the filtrate was concentrated to provide the carboxylic acid **S2** as a yellow foam (14.6 g, 98%). The product obtained was judged to be of >95% purity (600 MHz, <sup>1</sup>H NMR analysis) used without further purification.

$R_f = 0.19$  (1% acetic acid–50% ethyl acetate–hexanes; UV). <sup>1</sup>H NMR (600 MHz, CDCl<sub>3</sub>) δ 2.53 (t,  $J = 4.9$  Hz, 2H, H<sub>1</sub>), 2.47 – 2.23 (m, 4H, H<sub>2</sub>, H<sub>8</sub>), 1.97 – 1.75 (m, 1H, H<sub>7a</sub>), 1.75 – 1.60 (m, 2H, H<sub>7b</sub>, H<sub>6</sub>), 1.46 (s, 3H, H<sub>15</sub>), 1.03 (d,  $J = 6.5$  Hz, 3H, H<sub>16</sub>). <sup>13</sup>C NMR (150 MHz, CDCl<sub>3</sub>) δ 207.8 (C), 177.9 (C), 174.7 (C), 140.3 (C), 45.4 (C), 39.0 (CH), 34.6 (CH<sub>2</sub>), 29.8 (CH<sub>2</sub>), 27.9 (CH<sub>2</sub>), 26.8 (CH<sub>2</sub>), 21.2 (CH<sub>3</sub>), 16.0 (CH<sub>3</sub>). IR (ATR-FTIR), cm<sup>-1</sup>: 2929 (w), 1681 (s), 1631 (m). HRMS-ESI (m/z): [M + Na]<sup>+</sup> calcd for [C<sub>12</sub>H<sub>16</sub>O<sub>3</sub>Na]<sup>+</sup> 231.0992; found 231.1001.  $[\alpha]_D^{20} = +156.4$  ( $c = 1.13$ , CHCl<sub>3</sub>).

*Preparation of diazomethane.*

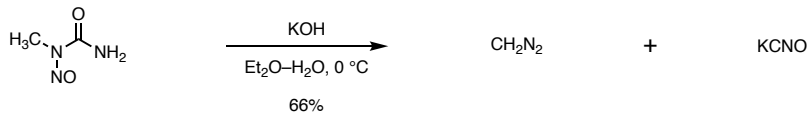

**CAUTION:** Explosion and shock hazard. Needles should be avoided and unscratched glassware should be used. Perform reagent preparation, aqueous workup, and all reactions in a well-ventilated fume hood behind a blast shield. All glassware and waste solutions should be quenched extremely carefully with dilute acid before removing from fume hood.

Diazomethane was prepared according to the method of Arndt.<sup>4</sup> *N*-nitroso-*N*-methylurea (64.7 g, 628 mmol, 1 equiv) was added in five portions over 15 min to a stirring biphasic mixture of ether (630 mL) and aqueous potassium hydroxide solution (50% w/w, 140 mL) at 0 °C. The resulting yellow biphasic mixture was stirred for 30 min at 0 °C. The yellow organic layer was carefully decanted into a 2 L Erlenmeyer flask and dried over potassium hydroxide. Titration with benzoic acid was used to determine the concentration of the solution of diazomethane in ether as 0.66 M (66%). The diazomethane solution was used immediately in the next step without further purification.

Synthesis of the  $\alpha$ -diazoketone **11**.

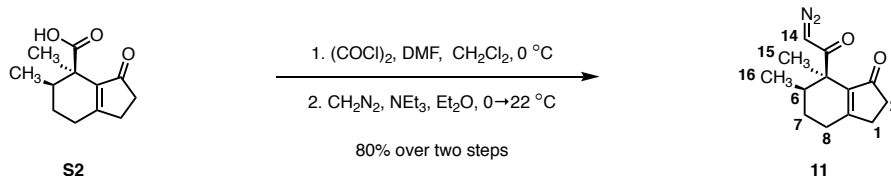

Oxalyl chloride (3.17 mL, 36.9 mmol, 1.10 equiv) was added dropwise over 5 min to a solution of the carboxylic acid **S2** [7.00 g, 33.6 mmol, 1 equiv; dried by azeotropic distillation with benzene ( $3 \times 20$  mL)] and *N,N*-dimethylformamide (5.51 mL, 67.2 mmol, 2.00 equiv) in dichloromethane (56 mL) at 0 °C. The reaction mixture was stirred for 2 h at 0 °C. The product mixture was concentrated. The residue obtained was dissolved in dichloromethane (20 mL) and the resulting solution was eluted over a plug of silica gel (5.0 cm  $\times$  5.0 cm). The silica gel plug was washed with 50% ether–hexanes (100 mL). The filtrates were combined and the combined filtrates were concentrated. The residue obtained was used directly in the following step.

A solution of the unpurified acid chloride obtained in the preceding step (nominally 33.6 mmol, 1 equiv) in ether (75 mL) was added dropwise over 20 min to a solution of diazomethane in ether (ca. 0.66 M, 226 mL, 7.00 equiv) and triethylamine (14.1 mL, 101 mmol, 3.00 equiv) at 0 °C. The reaction mixture was stirred for 1 h at 0 °C. The reaction mixture was allowed to warm to 22 °C over 1 h. The warmed reaction mixture was stirred for 12 h at 22 °C. The product mixture was cooled to 0 °C over 20 min. The cooled product mixture was diluted slowly with aqueous potassium phosphate buffer solution (pH 7, 200 mL). The resulting biphasic mixture was stirred for 2 h at 0 °C. The stirred biphasic mixture was transferred to a separatory funnel and the layers that formed were separated. The aqueous layer was extracted with ether ( $3 \times 200$  mL). The organic layers were combined and the combined organic layers were washed sequentially with water (300 mL) and saturated aqueous sodium chloride solution (300 mL). The washed organic layer was dried over magnesium sulfate. The dried solution was filtered, and the filtrate was concentrated. The residue obtained was purified by flash-column chromatography (eluting with 30% ethyl acetate–hexanes initially, grading to 80% ethyl acetate–hexanes, four steps) to provide the diazoketone **11** as a yellow solid (6.21 g, 80% over two steps).

$R_f = 0.25$  (50% ethyl acetate–hexanes; UV).  $^1\text{H NMR}$  (400 MHz,  $\text{CDCl}_3$ )  $\delta$  5.37 (s, 1H,  $\text{H}_{14}$ ), 2.57 – 2.50 (m, 2H,  $\text{H}_1$ ), 2.49 – 2.34 (m, 4H,  $\text{H}_2$ ,  $\text{H}_8$ ), 1.98 – 1.78 (m, 1H,  $\text{H}_{7a}$ ), 1.68 (ddd,  $J = 13.6, 5.8, 3.0$  Hz, 1H,  $\text{H}_{7b}$ ), 1.63 – 1.53 (m, 1H,  $\text{H}_6$ ), 1.43 (s, 3H,  $\text{H}_{15}$ ), 0.99 (d,  $J = 7.0$  Hz, 3H,  $\text{H}_{16}$ ).  $^{13}\text{C NMR}$  (125 MHz,  $\text{CDCl}_3$ )  $\delta$  207.3 (C), 196.0 (C), 175.3 (C), 141.2 (C), 54.8 (CH), 48.8 (C), 40.0 (CH), 34.9 ( $\text{CH}_2$ ), 29.8 ( $\text{CH}_2$ ), 28.4 ( $\text{CH}_2$ ), 27.3 ( $\text{CH}_2$ ), 20.5 ( $\text{CH}_3$ ), 16.0 ( $\text{CH}_3$ ). IR (ATR-FTIR),  $\text{cm}^{-1}$ : 2930 (w), 2097 (s), 1691 (s), 1631 (m), 1347 (m). HRMS-ESI ( $m/z$ ):  $[\text{M} + \text{Na}]^+$  calcd for  $[\text{C}_{13}\text{H}_{16}\text{N}_2\text{O}_2\text{Na}]^+$  255.1109; found 255.1115.  $[\alpha]_D^{20} = +385.2$  ( $c = 0.880$ ,  $\text{CHCl}_3$ ).



Synthesis of the Arndt–Eistert homologation products **12** and **13**.

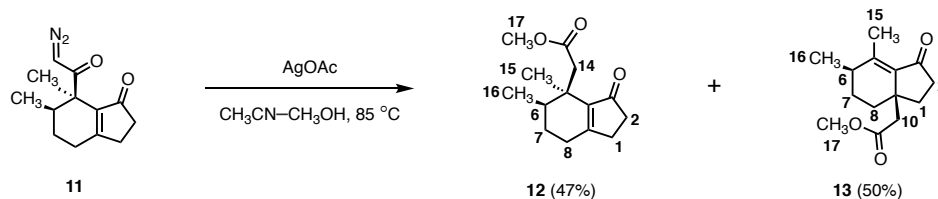

A solution of the diazoketone **11** (2.30 g, 8.91 mmol, 1 equiv) in acetonitrile (100 mL) was added rapidly over 1 min via additional funnel to a suspension of silver acetate (446 mg, 2.67 mmol, 0.30 equiv) in methanol (72 mL) and acetonitrile (400 mL) that had been preheated to 85 °C. The reaction mixture was stirred for 1 h at 85 °C. The product mixture was cooled to 22 °C over 20 min. The cooled product mixture was filtered through a pad of Celite. The Celite pad was rinsed with ethyl acetate (2 × 100 mL). The filtrates were combined and the combined filtrates were concentrated. The residue obtained was purified by flash-column chromatography (eluting with 10% ethyl acetate–hexanes initially, grading to 30% ethyl acetate–hexanes, four steps) to provide separately the homologation product **12** (pale yellow oil, 990 mg, 47%) and the rearranged ester **13** (pale yellow oil, 1.05 g, 50%).

Within the limits of detection (400 MHz <sup>1</sup>H NMR analysis), the rearranged product **13** was formed as a single diastereomer. The relative stereochemistry of **13** was established via X-ray analysis of the corresponding carboxylic acid **S3** (see page S152).

**12**:  $R_f = 0.51$  (50% ethyl acetate–hexanes; UV). <sup>1</sup>H NMR (500 MHz, CDCl<sub>3</sub>) δ 3.56 (s, 3H, H<sub>17</sub>), 2.62 – 2.51 (m, 2H, H<sub>14</sub>), 2.43 (q,  $J = 4.1, 3.2$  Hz, 2H, H<sub>1</sub>), 2.33 (dt,  $J = 9.0, 4.9$  Hz, 2H, H<sub>2</sub>), 2.31 – 2.22 (m, 2H, H<sub>8</sub>), 1.74 – 1.63 (m, 2H, H<sub>7a</sub>, H<sub>6</sub>), 1.50 – 1.38 (m, 1H, H<sub>7b</sub>), 1.33 (s, 3H, H<sub>15</sub>), 0.96 (d,  $J = 6.6$  Hz, 3H, H<sub>16</sub>). <sup>13</sup>C NMR (125 MHz, CDCl<sub>3</sub>) δ 208.3 (C), 173.0 (C), 172.9 (C), 142.1 (C), 51.2 (CH<sub>3</sub>), 39.0 (CH), 38.6 (CH<sub>2</sub>), 37.1 (C), 35.1 (CH<sub>2</sub>), 29.3 (CH<sub>2</sub>), 27.8 (CH<sub>2</sub>), 26.5 (CH<sub>2</sub>), 24.3 (CH<sub>3</sub>), 14.9 (CH<sub>3</sub>). IR (ATR-FTIR), cm<sup>-1</sup>: 3366 (w), 2951 (w), 1731 (s), 1708 (s), 1629 (m), 1216 (m), 1168 (m). HRMS-ESI (m/z): [M + H]<sup>+</sup> calcd for [C<sub>14</sub>H<sub>21</sub>O<sub>3</sub>]<sup>+</sup> 237.1412, found 237.1496.  $[\alpha]_D^{20} = +42.9$  ( $c = 1.28$ , CHCl<sub>3</sub>).

**13**:  $R_f = 0.79$  (50% ethyl acetate–hexanes; UV). <sup>1</sup>H NMR (400 MHz, CDCl<sub>3</sub>) δ 3.64 (s, 3H, H<sub>17</sub>), 2.51 – 2.33 (m, 2H, H<sub>1a</sub>, H<sub>2a</sub>), 2.31 (s, 2H, H<sub>10</sub>), 2.25 – 2.16 (m, 2H, H<sub>6</sub>, H<sub>1b</sub>), 2.11 (dt,  $J = 13.0, 3.4$  Hz, 1H, H<sub>8a</sub>), 2.05 (s, 3H, H<sub>15</sub>), 1.83 (ddt,  $J = 13.9, 6.8, 3.4$  Hz, 1H, H<sub>7a</sub>), 1.54 – 1.36 (m, 2H, H<sub>2b</sub>, H<sub>7b</sub>), 1.33 – 1.21 (m, 1H, H<sub>8b</sub>), 1.11 (d,  $J = 7.1$  Hz, 3H, H<sub>16</sub>). <sup>13</sup>C NMR (100 MHz, CDCl<sub>3</sub>) δ 207.7 (C), 171.8 (C), 151.8 (C), 137.2 (C), 51.4 (CH<sub>3</sub>), 42.6 (C), 40.2 (CH<sub>2</sub>), 37.4 (CH), 35.6 (CH<sub>2</sub>), 33.4 (CH<sub>2</sub>), 32.1 (CH<sub>2</sub>), 28.3 (CH<sub>2</sub>), 19.7 (CH<sub>3</sub>), 16.9 (CH<sub>3</sub>). IR (ATR-FTIR), cm<sup>-1</sup>: 2932 (w), 1732 (m), 1688 (s), 1634 (m), 1202 (m), 1146 (m). HRMS-ESI (m/z): [M + H]<sup>+</sup> calcd for [C<sub>14</sub>H<sub>21</sub>O<sub>3</sub>]<sup>+</sup> 237.1412; found 237.1494.  $[\alpha]_D^{20} = +49.4$  ( $c = 0.720$ , CHCl<sub>3</sub>).

### Synthesis of the carboxylic acid **S3**.

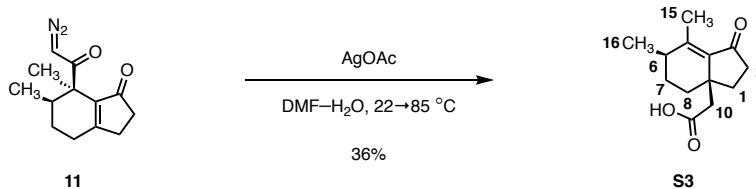

Silver acetate (4.30 mg, 25.8  $\mu\text{mol}$ , 0.30 equiv) was added to a solution of the diazoketone **11** (20.0 mg, 86.1  $\mu\text{mol}$ , 1 equiv) in a mixture of *N,N*-dimethylformamide and water (2:1 v/v, 4.4 mL) at 22 °C. The reaction vessel was placed in an oil bath that had been preheated to 85 °C. The reaction mixture was stirred for 40 min at 85 °C. The product mixture was cooled to 22 °C over 20 min. The cooled product mixture was diluted sequentially with ether (5.0 mL) and 2 N aqueous sodium hydroxide solution (6.0 mL). The resulting biphasic mixture was transferred to a separatory funnel and the layers that formed were separated. The aqueous layer was washed with ether (2  $\times$  10 mL). The washed aqueous layer was separated and the pH of the separated aqueous layer was adjusted to  $\sim$ 1 by the dropwise addition of 1 N aqueous hydrochloric acid solution at 22 °C. Ether (10 mL) was then added and the resulting biphasic mixture was transferred to a separatory funnel. The layers that formed were separated and the aqueous layer was extracted with ether (2  $\times$  10 mL). The organic layers were combined and the combined organic layers were dried over magnesium sulfate. The dried solution was filtered and the filtrate was concentrated. The residue obtained was purified by flash-column chromatography (eluting with 1% acetic acid–33% ether–hexanes initially, grading to 1% acetic acid–50% ether–hexanes, two steps) to provide the rearranged acid **S3** as a pale yellow oil (7.00 mg, 36%).

The relative stereochemistry of the carboxylic acid **S3** was determined by X-ray analysis (see page S152).

$R_f = 0.65$  (1% acetic acid–50% ether–hexanes; UV).  $^1\text{H}$  NMR (500 MHz,  $\text{CDCl}_3$ )  $\delta$  2.52 – 2.35 (m, 4H, H<sub>2a</sub>, H<sub>7a</sub>, H<sub>10</sub>), 2.33 – 2.18 (m, 3H, H<sub>2b</sub>, H<sub>6</sub>, H<sub>8a</sub>), 2.09 (s, 3H, H<sub>15</sub>), 1.88 (ddt,  $J = 13.9, 6.7, 3.3$  Hz, 1H, H<sub>1a</sub>), 1.59 – 1.41 (m, 2H, H<sub>1b</sub>, H<sub>7b</sub>), 1.31 (td,  $J = 13.7, 3.4$  Hz, 1H, H<sub>8b</sub>), 1.15 (d,  $J = 7.1$  Hz, 3H, H<sub>16</sub>).  $^{13}\text{C}$  NMR (125 MHz,  $\text{CDCl}_3$ )  $\delta$  207.8 (C), 176.7 (C), 152.5 (C), 137.2 (C), 42.8 (C), 40.0 (CH<sub>2</sub>), 37.6 (CH), 35.8 (CH<sub>2</sub>), 33.4 (CH<sub>2</sub>), 32.2 (CH<sub>2</sub>), 28.4 (CH<sub>2</sub>), 19.9 (CH<sub>3</sub>), 17.1 (CH<sub>3</sub>). IR (ATR-FTIR),  $\text{cm}^{-1}$ : 2931 (w), 2872 (w), 1702 (s), 1622 (s), 1459 (w), 1217 (m), 1081 (w). HRMS-ESI ( $m/z$ ):  $[\text{M} + \text{H}]^+$  calcd for  $[\text{C}_{13}\text{H}_{19}\text{O}_3]^+$  223.1334; found 223.1327.

### Synthesis of the cyanoester **18**.

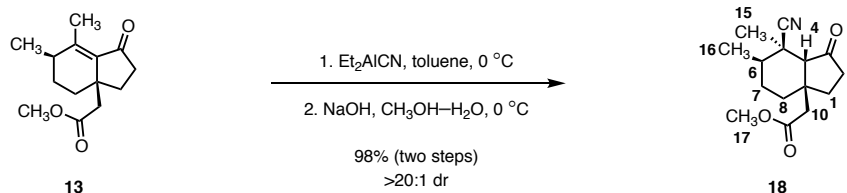

**CAUTION:** Cyanide hazard! Perform reaction, aqueous workup, and purification in a well-ventilated fume hood. All glassware and waste solutions should be washed with bleach prior to removing from fume hood.

A solution of diethylaluminum cyanide solution in toluene (1.0 M, 14.6 mL, 14.6 mmol, 1.50 equiv) was added dropwise over 2 min to a solution of the enone **13** (2.50 g, 9.73 mmol, 1 equiv) in toluene (100 mL) at 0 °C. The reaction mixture was stirred for 20 min at 0 °C. The product mixture was diluted with saturated aqueous potassium sodium tartrate solution (60 mL). The resulting biphasic mixture was stirred vigorously for 2 h at 22 °C. The stirred biphasic mixture was transferred to a separatory funnel and the layers that formed were separated. The aqueous layer was extracted with ether (3 × 80 mL). The organic layers were combined and the combined organic layers were washed with saturated aqueous sodium chloride solution (100 mL). The washed organic layer was dried over magnesium sulfate. The dried solution was filtered and the filtrate was concentrated. The residue obtained was used directly in the following step.

Aqueous sodium hydroxide solution (13 mL) was added dropwise over 1 min to a solution of the cyanoester **18** obtained in the preceding step (nominally 9.73 mmol, 1 equiv) in methanol (65 mL) at 0 °C. The reaction mixture was stirred for 1 h at 0 °C. The product mixture was diluted sequentially with ether (100 mL) and saturated aqueous ammonium chloride solution (100 mL). The resulting biphasic mixture was transferred to a separatory funnel and the layers that formed were separated. The aqueous layer was extracted with ether (3 × 100 mL). The organic layers were combined and the combined organic layers were washed with saturated aqueous sodium chloride solution (200 mL). The washed organic layer was dried over magnesium sulfate. The dried solution was filtered and the filtrate was concentrated. The residue obtained was purified by flash-column chromatography (eluting with 25% ether–hexanes) to provide the cyanoester **18** as a pale yellow oil (2.55 g, 98% over two steps).

<sup>1</sup>H NMR analysis (500 MHz) of the unpurified product indicated a >20:1 mixture of diastereomers. The relative stereochemistry of the cyanoester **18** was established via X-ray analysis of the methylation product **19** (see page S154).

R<sub>f</sub> = 0.31 (50% ether–hexanes; PAA). <sup>1</sup>H NMR (600 MHz, CDCl<sub>3</sub>) δ 3.69 (s, 3H, H<sub>17</sub>), 2.95 (s, 1H, H<sub>4</sub>), 2.87 (dd, *J* = 98.7, 16.4 Hz, 2H, H<sub>10</sub>), 2.30 (dddd, *J* = 19.8, 10.8, 2.3, 1.2 Hz, 1H, H<sub>2a</sub>), 2.22 (dt, *J* = 19.6, 9.6 Hz, 1H, H<sub>2b</sub>), 2.04 (dt, *J* = 13.0, 10.4 Hz, 1H, H<sub>1a</sub>), 1.74 (s, 3H, H<sub>15</sub>), 1.69 (ddd, *J* = 13.1, 9.4, 2.2 Hz, 1H, H<sub>1b</sub>), 1.64 (dd, *J* = 14.4, 2.8 Hz, 1H, H<sub>7a</sub>), 1.59 – 1.50 (m, 3H, H<sub>6</sub>, H<sub>8</sub>), 1.26 (ddd, *J* = 13.8, 9.3, 7.4 Hz, 1H, H<sub>7b</sub>), 1.06 (d, *J* = 5.8 Hz, 3H, H<sub>16</sub>). <sup>13</sup>C NMR (150 MHz, CDCl<sub>3</sub>) δ 214.4 (C), 172.0 (C), 122.9 (C), 57.4 (CH), 51.5 (CH<sub>3</sub>), 41.8 (C), 40.2 (CH<sub>2</sub>), 39.0 (C), 36.1 (CH), 34.0 (CH<sub>2</sub>), 31.9 (CH<sub>2</sub>), 30.4 (CH<sub>2</sub>), 28.5 (CH<sub>2</sub>), 22.6 (CH<sub>3</sub>), 16.8 (CH<sub>3</sub>). IR (ATR-

FTIR),  $\text{cm}^{-1}$ : 3323 (w), 2937 (w), 2360 (s), 2338 (s), 1734 (m). HRMS-ESI ( $m/z$ ):  $[\text{M} + \text{Na}]^+$  calcd for  $[\text{C}_{15}\text{H}_{21}\text{NO}_3\text{Na}]^+$  286.1419; found 286.1426.  $[\alpha]_D^{20} = +45.3$  ( $c = 0.576$ ,  $\text{CH}_3\text{OH}$ ).

### Synthesis of the ketal **S4**.

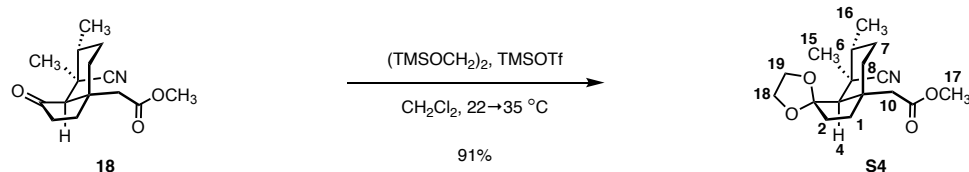

Trimethylsilyl trifluoromethanesulfonate (1.10 mL, 6.08 mmol, 2.00 equiv) was added to a solution of 1,2-bis(trimethylsiloxy)ethane (2.92 mL, 15.2 mmol, 5.00 equiv) and the cyanoester **18** [801 mg, 3.04 mmol, 1 equiv; dried by azeotropic distillation from benzene ( $3 \times 5.0$  mL)] in dichloromethane (15 mL) at 22 °C. The reaction vessel was placed in an oil bath that had been preheated to 35 °C. The reaction mixture was stirred for 4 d at 35 °C. The product mixture was cooled to 22 °C over 20 min. The cooled product mixture was diluted with ether (20 mL) and carefully poured into saturated aqueous sodium bicarbonate solution (35 mL) at 0 °C. The resulting biphasic mixture was transferred to a separatory funnel and the layers that formed were separated. The aqueous layer was extracted with ether ( $3 \times 30$  mL). The organic layers were combined and the combined organic layers were washed with saturated aqueous sodium chloride solution (60 mL). The washed organic layer was dried over magnesium sulfate. The dried solution was filtered and the filtrate was concentrated. The residue obtained was purified by flash-column chromatography (eluting with 15% ether–hexanes initially, grading to 30% ether–hexanes, three steps) to provide the ketal **S4** as a pale yellow oil (853 mg, 91%).

$R_f = 0.35$  (50% ether–hexanes; PAA).  $^1\text{H NMR}$  (500 MHz,  $\text{CDCl}_3$ )  $\delta$  3.96 (q,  $J = 8.9, 8.0$  Hz, 1H,  $\text{H}_{18\text{a}}$  or  $\text{H}_{19\text{a}}$ ), 3.91 – 3.83 (m, 2H,  $\text{H}_{18\text{b}}$ ,  $\text{H}_{19\text{b}}$ ), 3.78 (td,  $J = 8.5, 7.3, 5.8$  Hz, 1H,  $\text{H}_{18\text{a}}$  or  $\text{H}_{19\text{a}}$ ), 3.65 (s, 3H,  $\text{H}_{17}$ ), 2.80 (dd,  $J = 261.2, 15.0$  Hz, 2H,  $\text{H}_{10}$ ), 2.48 (d,  $J = 1.9$  Hz, 1H,  $\text{H}_4$ ), 2.13 (ddt,  $J = 11.3, 6.8, 3.3$  Hz, 1H,  $\text{H}_6$ ), 1.87 – 1.81 (m, 2H,  $\text{H}_2$ ), 1.76 (ddt,  $J = 15.7, 11.2, 5.6$ , 1H,  $\text{H}_{1\text{a}}$ ), 1.71 – 1.47 (m, 5H,  $\text{H}_{1\text{b}}$ ,  $\text{H}_8$ ,  $\text{H}_7$ ), 1.45 (s, 3H,  $\text{H}_{15}$ ), 1.05 (d,  $J = 6.7$  Hz, 3H,  $\text{H}_{16}$ ).  $^{13}\text{C NMR}$  (125 MHz,  $\text{CDCl}_3$ )  $\delta$  172.3 (C), 124.0 (C), 118.7 (C), 63.7 ( $\text{CH}_2$ ), 62.1 ( $\text{CH}_2$ ), 54.7 (CH), 51.2 ( $\text{CH}_3$ ), 42.8 (C), 42.0 ( $\text{CH}_2$ ), 39.0 (C), 35.2 ( $\text{CH}_2$ ), 35.1 (CH), 33.8 ( $\text{CH}_2$ ), 30.1 ( $\text{CH}_2$ ), 28.5 ( $\text{CH}_2$ ), 22.1 ( $\text{CH}_3$ ), 17.2 ( $\text{CH}_3$ ). IR (AT-FTIR),  $\text{cm}^{-1}$ : 2947 (w), 2889 (w), 1735 (s), 1153 (m). HRMS-ESI ( $m/z$ ):  $[\text{M} + \text{Na}]^+$  calcd for  $[\text{C}_{17}\text{H}_{25}\text{NO}_4\text{Na}]^+$  330.1681; found 330.1691.  $[\alpha]_D^{20} = -28.7$  ( $c = 0.465$ ,  $\text{CH}_3\text{OH}$ ).

### Synthesis of the methylation product **19**.

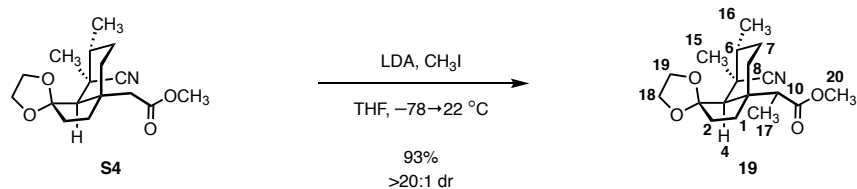

A solution of lithium diisopropylamide in tetrahydrofuran (1.3 M, 15.6 mL, 19.5 mmol, 2.40 equiv) was added to the solution of the ketal **S4** [2.50 g, 8.13 mmol, 1 equiv; dried by azeotropic distillation from benzene (3 × 5.0 mL)] in tetrahydrofuran (41 mL) at -78 °C. The reaction mixture was stirred for 2 h at -78 °C. The reaction mixture was warmed to 0 °C over 10 min and stirred for an additional 1 h at 0 °C. The reaction mixture was cooled to -78 °C over 30 min. Iodomethane (1.52 mL, 24.4 mmol, 3.00 equiv) was then added dropwise over 5 min to the cooled reaction mixture. The reaction mixture was stirred for 1 h at -78 °C and then was warmed to 22 °C over 2 h. The warmed reaction mixture was stirred for 15 h at 22 °C. The product mixture was diluted sequentially with ether (50 mL) and saturated aqueous ammonium chloride solution (50 mL). The resulting biphasic mixture was stirred for 15 min at 22 °C. The stirred biphasic mixture was transferred to a separatory funnel and the layers that formed were separated. The aqueous layer was extracted with ether (3 × 50 mL). The organic layers were combined and the combined organic layers were washed sequentially with water (60 mL) and saturated aqueous sodium chloride solution (60 mL). The washed organic layer was dried over magnesium sulfate. The dried solution was filtered and the filtrate was concentrated. The residue obtained was purified by flash-column chromatography (eluting with 15% ether–hexanes initially, grading to 30% ether–hexanes, two steps) to provide the methylation product **19** as a white, crystalline solid (2.40 g, 93%).

Within the limits of detection (500 MHz <sup>1</sup>H NMR analysis), the methylation product **19** was formed as a single diastereomer. The relative stereochemistry of **19** was established via X-ray analysis (see page S161).

$R_f = 0.34$  (50% ether–hexanes; PAA). <sup>1</sup>H NMR (500 MHz, CDCl<sub>3</sub>) δ 4.04 – 3.94 (m, 1H, H<sub>18a</sub>, H<sub>19a</sub>), 3.94 – 3.74 (m, 3H, H<sub>18a</sub> or <sub>19a</sub>, H<sub>18b</sub>, H<sub>19b</sub>), 3.70 (s, 3H, H<sub>20</sub>), 3.39 (q,  $J = 7.1$  Hz, 1H, H<sub>10</sub>), 2.89 (s, 1H, H<sub>4</sub>), 2.21 – 2.08 (m, 2H, H<sub>1a</sub>, H<sub>6</sub>), 1.89 – 1.75 (m, 2H, H<sub>2</sub>), 1.71 – 1.63 (m, 1H, H<sub>8a</sub>), 1.59 (dd,  $J = 13.2, 3.5$ , 1H, H<sub>8b</sub>), 1.50 – 1.43 (m, 1H, H<sub>7a</sub>), 1.45 (s, 3H, H<sub>15</sub>), 1.43 – 1.34 (m, 1H, H<sub>7b</sub>), 1.29 (ddd,  $J = 12.7, 8.8, 5.9$  Hz, 1H, H<sub>1b</sub>), 1.16 (d,  $J = 7.3$  Hz, 3H, H<sub>17</sub>), 1.05 (d,  $J = 6.8$  Hz, 3H, H<sub>16</sub>). <sup>13</sup>C NMR (125 MHz, CDCl<sub>3</sub>) δ 176.0 (C), 123.9 (C), 119.1 (C), 63.7 (CH<sub>2</sub>), 62.1 (CH<sub>2</sub>), 51.4 (CH<sub>3</sub>), 51.0 (CH), 45.0 (C), 41.1 (CH), 39.0 (C), 35.5 (CH), 34.6 (CH<sub>2</sub>), 30.4 (CH<sub>2</sub>), 29.3 (CH<sub>2</sub>), 28.1 (CH<sub>2</sub>), 22.5 (CH<sub>3</sub>), 17.3 (CH<sub>3</sub>), 13.5 (CH<sub>3</sub>). IR (ATR-FTIR), cm<sup>-1</sup>: 2443 (m), 2348 (m), 1738 (s), 1371 (s), 1210 (s). HRMS-ESI (m/z): [M + Na]<sup>+</sup> calcd for [C<sub>18</sub>H<sub>27</sub>NO<sub>4</sub>Na]<sup>+</sup> 344.1838; found 344.1849.  $[\alpha]_D^{20} = -123.8$  ( $c = 0.285$ , CHCl<sub>3</sub>).

### Synthesis of the aldehyde **20**.

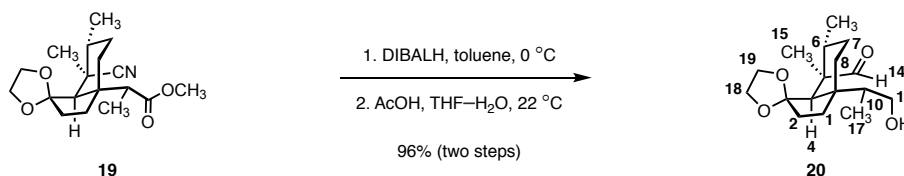

A solution of diisobutylaluminum hydride toluene (1.0 M, 8.71 mL, 8.71 mmol, 3.50 equiv) was added over 1 min to a solution of the cyanoester **19** [800 mg, 2.49 mmol, 1 equiv; dried by azeotropic distillation with benzene (3 × 10 mL)] in toluene (17 mL) at 0 °C. The reaction mixture was stirred for 15 min at 0 °C. The product mixture was diluted sequentially with ethyl acetate (20 mL) and saturated aqueous potassium sodium tartrate solution (30 mL). The resulting biphasic mixture was stirred vigorously for 2 h at 22 °C. The stirred biphasic mixture was transferred to a separatory funnel and the layers that formed were separated. The aqueous layer was extracted with ethyl acetate (2 × 30 mL). The organic layers were combined and the combined organic layers were washed with saturated aqueous sodium chloride solution (60 mL). The washed organic layer was dried over magnesium sulfate. The dried solution was filtered and the filtrate was concentrated. The residue obtained was used directly in the following step.

Acetic acid (286 μL, 4.98 mmol, 2.00 equiv) was added to a solution of the imine obtained in the preceding step (nominally 2.49 mmol, 1 equiv) in 4:1 tetrahydrofuran–water (v/v, 18 mL) at 22 °C. The reaction mixture was stirred for 1 h at 22 °C. The product mixture was diluted sequentially with ethyl acetate (20 mL) and saturated aqueous sodium bicarbonate solution (20 mL). The resulting biphasic mixture was transferred to a separatory funnel and the layers that formed were separated. The aqueous layer was extracted with ethyl acetate (3 × 40 mL). The organic layers were combined and the combined organic layers were washed with saturated aqueous sodium chloride solution (50 mL). The washed organic layer was dried over magnesium sulfate. The dried solution was filtered and the filtrate was concentrated to provide the aldehyde **20** as a colorless oil (770 mg, 96%, two steps). The aldehyde **20** was determined to be >95% pure by quantitative <sup>1</sup>H NMR analysis (500 MHz) and was used directly in the following step.

$R_f = 0.46$  (50% ethyl acetate–hexanes; PAA). <sup>1</sup>H NMR (500 MHz, CDCl<sub>3</sub>) δ 9.80 (s, 1H, H<sub>14</sub>), 4.07 – 3.73 (m, 5H, H<sub>18</sub>, H<sub>19</sub>, H<sub>11a</sub>), 3.24 (t,  $J = 9.4$  Hz, 1H, H<sub>11b</sub>), 2.75 (s, 1H, H<sub>4</sub>), 2.21 – 2.09 (m, 1H, H<sub>6</sub>), 1.84 (ddt,  $J = 24.1, 14.1, 9.4$  Hz, 2H, H<sub>2</sub>), 1.72 – 1.37 (m, 6H, H<sub>1a</sub>, H<sub>7</sub>, H<sub>8</sub>, H<sub>10</sub>), 1.31 (ddd,  $J = 17.5, 7.9, 3.3$  Hz, 1H, H<sub>1b</sub>), 1.17 (s, 3H, H<sub>15</sub>), 1.07 (d,  $J = 7.2$  Hz, 3H, H<sub>16</sub>), 0.94 (d,  $J = 6.7$  Hz, 3H, H<sub>17</sub>). <sup>13</sup>C NMR (125 MHz, CDCl<sub>3</sub>) δ 207.1 (CH), 119.8 (C), 65.0 (CH<sub>2</sub>), 63.9 (CH<sub>2</sub>), 62.3 (CH<sub>2</sub>), 49.6 (C), 48.8 (CH), 45.6 (C), 38.0 (CH), 35.8 (CH<sub>2</sub>), 35.0 (CH), 29.0 (CH<sub>2</sub>), 28.4 (CH<sub>2</sub>), 27.2 (CH<sub>2</sub>), 18.9 (CH<sub>3</sub>), 15.5 (CH<sub>3</sub>), 12.9 (CH<sub>3</sub>). IR (ATR-FTIR), cm<sup>-1</sup>: 3414 (w), 2941 (s), 2878 (m), 1699 (m), 1457 (w). HRMS-ESI (m/z): [M + Na]<sup>+</sup> calcd for [C<sub>17</sub>H<sub>28</sub>O<sub>4</sub>Na]<sup>+</sup> 319.1885; found 319.1894.  $[\alpha]_D^{20} = -72.9$  ( $c = 0.750$ , CHCl<sub>3</sub>).

### Synthesis of the homopropargylic alcohol **21**.

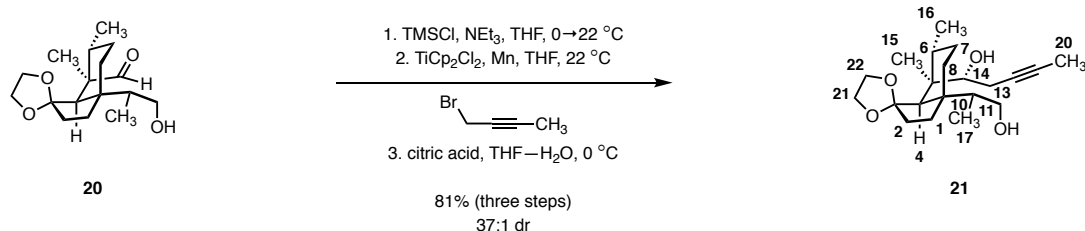

Trimethylsilyl chloride (152  $\mu$ L, 1.19 mmol, 1.10 equiv) was added dropwise over 1 min to a solution of triethylamine (303  $\mu$ L, 2.17 mmol, 2.00 equiv) and the aldehyde **20** (321 mg, 1.09 mmol, 1 equiv) in tetrahydrofuran (11 mL) at 0 °C. Upon completion of the addition, the cooling bath was removed and the reaction mixture was allowed to warm to 22 °C over 2 h. The product mixture was cooled to 0 °C over 20 min and the cooled product mixture was diluted sequentially with ether (10 mL) and aqueous potassium phosphate buffer solution (pH 7, 10 mL). The resulting biphasic mixture was transferred to a separatory funnel and the layers that formed were separated. The aqueous layer was extracted with ether (2  $\times$  10 mL). The organic layers were combined and the combined organic layers were washed with saturated aqueous sodium chloride solution (10 mL). The washed organic layer was dried over magnesium sulfate. The dried solution was filtered and the filtrate was concentrated. The residue obtained was used directly in the following step.

A mixture of bis(cyclopentadienyl)titanium(IV) dichloride (811 mg, 3.26 mmol, 3.00 equiv) and manganese powder (715 mg, 13.0 mmol, 12.0 equiv) in tetrahydrofuran (13 mL) was stirred vigorously at 22 °C until a light green color persisted (approximately 30 min). A solution of the protected alcohol obtained in the preceding step (nominally 1.09 mmol, 1 equiv) and 1-bromobut-2-yne (577 mg, 4.34 mmol, 4.00 equiv) in tetrahydrofuran (13 mL) was added dropwise over 40 min at 22 °C using a syringe pump. The reaction mixture was stirred for 2 h at 22 °C. The product mixture was diluted with hexanes (20 mL) the diluted product mixture was eluted over a plug of silica gel (2.0 cm  $\times$  2.0 cm, eluting with 30% ether–hexanes). The filtrates were combined and the combined filtrates were concentrated. The residue obtained was used directly in the following step.

Aqueous citric acid solution (10% w/v, 6.3 mL) was added dropwise to a solution of the addition product obtained in the preceding step (nominally 1.09 mmol, 1 equiv) in tetrahydrofuran (20 mL) at 0 °C. The reaction mixture was stirred for 30 min at 0 °C. The product mixture was diluted sequentially with ethyl acetate (40 mL) and saturated aqueous sodium bicarbonate solution (40 mL). The resulting biphasic mixture was transferred to a separatory funnel and the layers that formed were separated. The aqueous layer was extracted with ethyl acetate (4  $\times$  60 mL). The organic layers were combined and the combined organic layers were washed with saturated aqueous sodium chloride solution (90 mL). The washed organic layer was dried over magnesium sulfate. The dried solution was filtered and the filtrate was concentrated. The residue obtained was purified by flash-column chromatography (eluting with 15% ethyl acetate–hexanes initially, grading to 30% ethyl acetate–hexanes, four steps) to provide the homopropargylic alcohol **21** as an off-white foam (325 mg, 81% over three steps).



$^1\text{H}$  NMR analysis (400 MHz) of the unpurified product mixture indicated a >20:1 mixture of diastereomers. The relative stereochemistry of the homopropargylic alcohol **21** was later determined by NOE correlations in the cyclization product **S6**.

$R_f$  = 0.34 (50% ethyl acetate–hexanes; PAA).  $^1\text{H}$  NMR (400 MHz,  $\text{C}_6\text{D}_6$ )  $\delta$  4.22 (dt,  $J$  = 10.5, 2.9 Hz, 1H,  $\text{H}_{14}$ ), 3.62 – 3.50 (m, 2H,  $\text{H}_{11a}$ ,  $\text{H}_{21a}$  or  $22a$ ), 3.44 – 3.34 (m, 2H,  $\text{H}_{21b}$ ,  $\text{H}_{22b}$ ), 3.34 – 3.23 (m, 1H,  $\text{H}_{21a}$  or  $22a$ ), 3.10 (td,  $J$  = 9.9, 5.7 Hz, 1H,  $\text{H}_{11b}$ ), 2.72 (s, 1H,  $\text{H}_4$ ), 2.44 (dt,  $J$  = 16.4, 2.5 Hz, 1H,  $\text{H}_{13a}$ ), 2.31 (ddq,  $J$  = 15.8, 10.6, 2.5 Hz, 1H,  $\text{H}_{13b}$ ), 2.14 (ddt,  $J$  = 15.8, 10.6, 2.5 Hz, 1H,  $\text{H}_{10}$ ), 1.93 (d,  $J$  = 3.3 Hz, 1H, OH), 1.90 – 1.78 (m, 2H,  $\text{H}_2$ ), 1.59 – 1.45 (m, 3H,  $\text{H}_{1a}$ ,  $\text{H}_6$ ,  $\text{H}_{8a}$ ), 1.43 (t,  $J$  = 2.5 Hz, 3H,  $\text{H}_{20}$ ), 1.35 (dt,  $J$  = 13.3, 9.3 Hz, 3H,  $\text{H}_{1b}$ ,  $\text{H}_7$ ), 1.17 – 1.04 (m, 10H,  $\text{H}_{15}$ ,  $\text{H}_{16}$ ,  $\text{H}_{17}$ ,  $\text{H}_{8b}$ ).  $^{13}\text{C}$  NMR (150 MHz,  $\text{C}_6\text{D}_6$ )  $\delta$  121.4 (C), 77.8 (C), 77.6 (C), 76.0 (CH), 64.9 ( $\text{CH}_2$ ), 63.8 ( $\text{CH}_2$ ), 62.9 ( $\text{CH}_2$ ), 46.0 (C), 45.5 (CH), 42.7 (CH), 41.1 (C), 36.5 (CH), 35.8 ( $\text{CH}_2$ ), 30.5 ( $\text{CH}_2$ ), 29.8 (broad,  $\text{CH}_2$ ), 25.7 ( $\text{CH}_2$ ), 22.8 ( $\text{CH}_2$ ), 20.5 ( $\text{CH}_3$ ), 17.0 ( $\text{CH}_3$ ), 13.1 ( $\text{CH}_3$ ), 2.9 ( $\text{CH}_3$ ). IR (AT-FTIR),  $\text{cm}^{-1}$ : 2952 (w), 1715 (s), 1396 (m), 1299 (m). HRMS-ESI ( $m/z$ ):  $[\text{M} + \text{Na}]^+$  calcd for  $[\text{C}_{21}\text{H}_{34}\text{O}_4\text{Na}]^+$  373.2355; found 373.2366.  $[\alpha]_D^{20} = +156.4$  ( $c = 1.13$ ,  $\text{CHCl}_3$ ).

### Synthesis of the lactol **S5**.

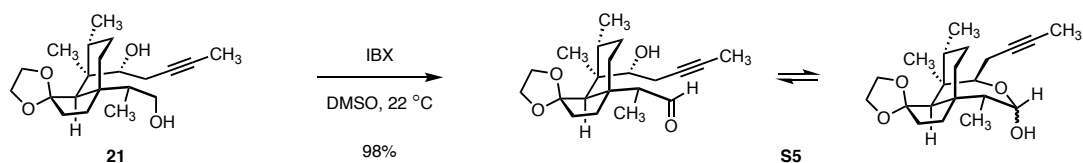

2-Iodoxybenzoic acid (IBX, 265 mg, 899  $\mu\text{mol}$ , 1.05 equiv) was added in one portion to a solution of the homopropargylic alcohol **21** (300 mg, 856  $\mu\text{mol}$ , 1 equiv) in dimethylsulfoxide (12 mL) at 22 °C. The reaction mixture was stirred for 3 h at 22 °C. The product mixture was diluted sequentially with ether (20 mL), saturated aqueous sodium bicarbonate solution (10 mL), and saturated aqueous sodium thiosulfate solution (10 mL) at 22 °C. The resulting biphasic mixture was stirred vigorously for 30 min at 22 °C. The stirred biphasic mixture was transferred to a separatory funnel and the layers that formed were separated. The aqueous layer was extracted with ether ( $3 \times 20$  mL). The organic layers were combined and the combined organic layers were washed with saturated aqueous sodium chloride solution (50 mL). The washed organic layer was dried over magnesium sulfate. The dried solution was filtered, and the filtrate was concentrated. The residue obtained was purified by flash-column chromatography (eluting with 5% ethyl acetate–hexanes initially, grading to 20% ethyl acetate–hexanes, three steps) to provide the lactol **S5** as a white foam (292 mg, 98%). The lactol **S5** was used immediately in the following step.

$^1\text{H}$  NMR analysis (400 MHz) of the purified product mixture indicated the presence of a 1:1 mixture of hydroxyaldehyde and lactol isomers.

Synthesis of the allylic silyl ether **S6**.

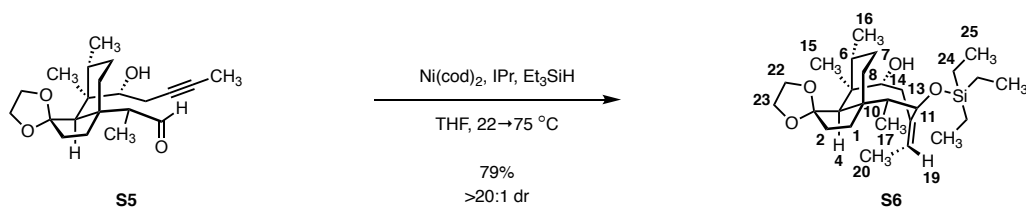

A solution of bis(cyclooctadiene)nickel(0) (5.50 mg, 20.1  $\mu\text{mol}$ , 0.20 equiv) and 1,3-bis(2,6-diisopropylphenyl)imidazol-2-ylidene (IPr, 7.80 mg, 20.1  $\mu\text{mol}$ , 0.20 equiv) in tetrahydrofuran (200  $\mu\text{L}$ ) was stirred for 30 min at 22  $^\circ\text{C}$  in a nitrogen-filled glovebox. The resulting solution was added to a solution of triethylsilane (47.9  $\mu\text{L}$ , 301  $\mu\text{mol}$ , 3.00 equiv) and the alkyne **S5** (35.0 mg, 101  $\mu\text{mol}$ , 1 equiv) in tetrahydrofuran (1.7 mL) in a round-bottomed flask fused to a Teflon-coated valve at 22  $^\circ\text{C}$  in a nitrogen-filled glovebox. The reaction vessel was sealed and the sealed reaction vessel was removed from the glovebox. The reaction vessel was placed in an oil bath that had been preheated to 75  $^\circ\text{C}$ . The reaction mixture was stirred for 3 h at 75  $^\circ\text{C}$ . The product mixture was cooled to 22  $^\circ\text{C}$  over 20 min. The cooled product mixture was eluted over a pad of silica gel (2.0 cm  $\times$  2.0 cm, eluting with 30% ether–hexanes). The filtrates were combined and the combined filtrates were concentrated. The residue obtained was purified by flash-column chromatography (eluting with 5% ether–hexanes initially, grading to 30% ether–hexanes, three steps) to provide the allylic silyl ether **S6** as a clear oil (34.0 mg, 79%).

Within the limits of detection (500 MHz  $^1\text{H}$  NMR analysis), the allylic silyl ether **S6** was formed as a single diastereomer. The relative stereochemistry of the C14 alcohol was determined by NOE correlations between H14 and H10. The relative stereochemistry of the C11 alcohol was determined by NOE correlations between H11 and H4. The relative stereochemistry was later confirmed by X-ray analysis of the mutilin derivative **26** (see page S163).

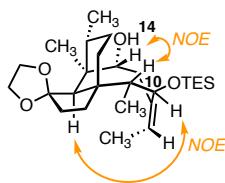

$R_f = 0.72$  (33% ether–hexanes; PAA).  $^1\text{H}$  NMR (500 MHz,  $\text{CDCl}_3$ )  $\delta$  5.29 (qd,  $J = 6.7, 2.6$  Hz, 1H, H<sub>19</sub>), 4.78 (dt,  $J = 11.3, 4.3$  Hz, 1H, H<sub>14</sub>), 4.01 – 3.91 (m, 1H, H<sub>22a</sub> or <sub>23a</sub>), 3.90 (d,  $J = 8.8$  Hz, 1H, H<sub>11</sub>), 3.83 (ddt,  $J = 19.2, 13.4, 6.6$  Hz, 2H, H<sub>22b</sub>, H<sub>23b</sub>), 3.71 – 3.63 (m, 1H, H<sub>22a</sub> or <sub>23a</sub>), 3.14 (d,  $J = 2.3$  Hz, 1H, H<sub>4</sub>), 2.58 (dd,  $J = 15.1, 11.5$  Hz, 1H, H<sub>13a</sub>), 2.33 (ddt,  $J = 15.0, 4.6, 2.4$ , 1H, H<sub>13b</sub>), 2.26 – 2.12 (m, 2H, H<sub>6</sub>, H<sub>10</sub>), 1.85 – 1.16 (m, 11H, H<sub>1</sub>, H<sub>2</sub>, H<sub>7</sub>, H<sub>8</sub>, H<sub>20</sub>), 1.06 – 0.99 (m, 6H, H<sub>15</sub>, H<sub>17</sub>), 0.97 – 0.88 (m, 12H, H<sub>16</sub>, H<sub>25</sub>), 0.64 – 0.50 (m, 6H, H<sub>24</sub>).  $^{13}\text{C}$  NMR (125 MHz,  $\text{CDCl}_3$ )  $\delta$  142.5 (C), 121.2 (CH), 119.9 (C), 84.9 (CH), 69.1 (CH), 63.7 (CH<sub>2</sub>), 61.4 (CH<sub>2</sub>), 50.6 (CH), 45.6 (C), 43.2 (C), 42.0 (CH), 36.0 (CH<sub>2</sub>), 35.9 (CH), 33.6 (CH<sub>2</sub>), 28.9 (CH<sub>2</sub>), 28.5 (CH<sub>2</sub>), 27.8 (CH<sub>2</sub>), 18.6 (CH<sub>3</sub>), 15.9 (CH<sub>3</sub>), 14.1 (CH<sub>3</sub>), 13.3 (CH<sub>3</sub>), 7.0 (3  $\times$  CH<sub>3</sub>), 5.1 (3  $\times$  CH<sub>2</sub>). IR (AT-FTIR),  $\text{cm}^{-1}$ : 2951 (m), 2875 (m). HRMS-ESI ( $m/z$ ):  $[\text{M} + \text{H}]^+$  calcd for  $[\text{C}_{27}\text{H}_{49}\text{O}_4\text{Si}]^+$  465.3400; found 465.3417.  $[\alpha]_D^{20} = +1.19$  ( $c = 0.156$ ,  $\text{CHCl}_3$ ).

### Synthesis of the ester **23**.

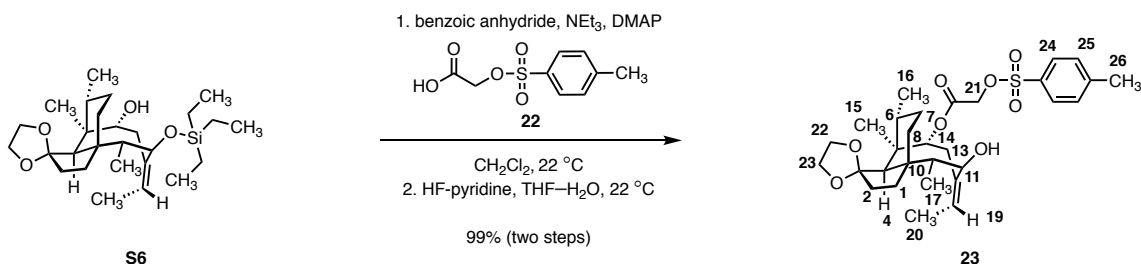

4-Dimethylaminopyridine (800 µg, 6.50 µmol, 0.10 equiv) was added to a solution of the sulfonated glycolic acid **22** (89.2 mg, 387 µmol, 6.00 equiv), benzoic anhydride (87.6 mg, 387 µmol, 6.00 equiv), triethylamine (63 µL, 452 µmol, 7.00 equiv) and the allylic silyl ether **S6** [30.0 mg, 64.5 µmol, 1 equiv; dried by azeotropic distillation with benzene (3 × 1.0 mL)], in dichloromethane (650 µL) at 22 °C. The reaction mixture was stirred for 2 h at 22 °C. The product mixture was diluted sequentially with ether (2.0 mL) and 1 N aqueous sodium hydroxide solution (1.0 mL). The resulting biphasic mixture was transferred to a separatory funnel and the layers that formed were separated. The aqueous layer was extracted with ether (4 × 2.0 mL). The organic layers were combined and the combined organic layers were washed with saturated aqueous sodium chloride solution (4.0 mL). The washed organic layer was dried over magnesium sulfate. The dried solution was filtered and the filtrate was concentrated. The residue obtained was used directly in the following step.

Hydrogen fluoride–pyridine complex (16.0 µL, 129 µmol, 2.00 equiv) was added to a solution of the product obtained in the preceding step (nominally 64.5 µmol, 1 equiv) in 2:1 tetrahydrofuran–water (v/v, 650 µL) at 22 °C. The reaction mixture was stirred for 16 h at 22 °C. The product mixture was diluted sequentially with ethyl acetate (1.0 mL) and saturated aqueous sodium bicarbonate solution (1.0 mL). The resulting biphasic mixture was transferred to a separatory funnel and the layers that formed were separated. The aqueous layer was extracted with ethyl acetate (3 × 1.0 mL). The organic layers were combined and the combined organic layers were washed with saturated aqueous sodium chloride solution (2.0 mL). The washed organic layer was dried over magnesium sulfate. The dried solution was filtered and the filtrate was concentrated. The residue obtained was purified by flash-column chromatography (eluting with 10% ethyl acetate–hexanes initially, grading to 50% ethyl acetate–hexanes, three steps) to provide the ester **23** as a white foam (44.0 mg, 99%, two steps).

R<sub>f</sub> = 0.43 (40% ethyl acetate–hexanes; PAA). <sup>1</sup>H NMR (600 MHz, CDCl<sub>3</sub>) δ 7.84 (d, *J* = 8.3 Hz, 2H, H<sub>24</sub>), 7.35 (d, *J* = 8.0 Hz, 2H, H<sub>25</sub>), 5.93 (dd, *J* = 11.7, 4.6 Hz, 1H, H<sub>14</sub>), 5.43 (qd, *J* = 6.7, 2.6 Hz, 1H, H<sub>19</sub>), 4.48 – 4.49 (m, 2H, H<sub>21</sub>), 4.01 – 3.93 (m, 1H, H<sub>22a</sub> or 23a), 3.90 (d, *J* = 9.2 Hz, 1H, H<sub>11</sub>), 3.84 (tq, *J* = 13.6, 6.6 Hz, 2H, H<sub>22b</sub>, H<sub>23b</sub>), 3.73 – 3.65 (m, 1H, H<sub>22a</sub> or 23a), 3.03 (s, 1H, H<sub>4</sub>), 2.66 (dd, *J* = 15.4, 11.7 Hz, 1H, H<sub>13a</sub>), 2.45 (s, 3H, H<sub>26</sub>), 2.27 – 2.18 (m, 3H, H<sub>6</sub>, H<sub>10</sub>, H<sub>13b</sub>), 1.95 – 1.69 (m, 2H, H<sub>2</sub>), 1.65 (dd, *J* = 6.7, 1.8 Hz, 3H, H<sub>20</sub>), 1.62 – 1.32 (m, 5H, H<sub>1a</sub>, H<sub>7</sub>, H<sub>8</sub>), 1.32 – 1.27 (m, 1H, H<sub>1b</sub>), 1.13 – 1.07 (m, 6H, H<sub>15</sub>, H<sub>17</sub>), 0.62 (d, *J* = 7.2 Hz, 3H, H<sub>16</sub>). <sup>13</sup>C NMR (150 MHz, CDCl<sub>3</sub>) δ 165.3 (C), 145.2 (C), 141.0 (C), 132.6 (C), 129.9 (2 × CH), 128.1 (2 × CH), 122.7 (CH), 119.5 (C), 83.6 (CH), 73.4 (CH), 65.0 (CH<sub>2</sub>), 63.8 (CH<sub>2</sub>), 61.4 (CH<sub>2</sub>), 50.6 (CH), 45.6 (C), 42.4 (C), 41.4 (CH), 35.9 (CH<sub>2</sub>), 35.5 (CH), 29.3 (CH<sub>2</sub>), 28.5 (CH<sub>2</sub>), 28.5 (CH<sub>2</sub>), 27.4 (CH<sub>2</sub>), 21.7

(CH<sub>3</sub>), 17.2 (CH<sub>3</sub>), 15.8 (CH<sub>3</sub>), 15.4 (CH<sub>3</sub>), 13.5 (CH<sub>3</sub>). IR (AT-FTIR), cm<sup>-1</sup>: 2946 (m), 2864 (w), 1757 (w), 1371 (m), 1177 (s), 1036 (m). HRMS-ESI (m/z): [M + Na]<sup>+</sup> calcd for [C<sub>30</sub>H<sub>42</sub>O<sub>8</sub>SNa]<sup>+</sup> 585.2498; found 585.2492.  $[\alpha]_D^{20} = -0.37$  ( $c = 0.322$ , CHCl<sub>3</sub>).

### Synthesis of the reduction product **35**.

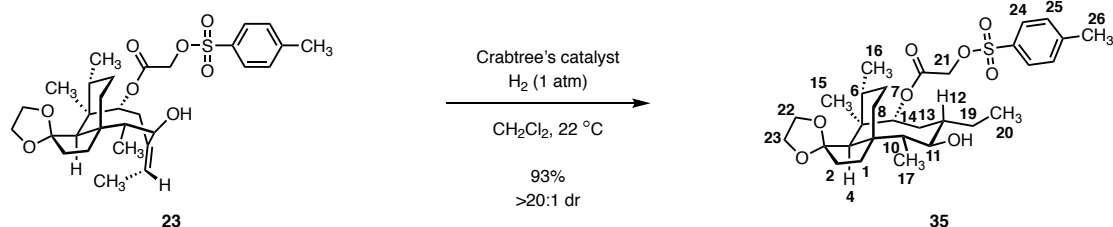

Crabtree's catalyst (1.00 mg, 1.2  $\mu\text{mol}$ , 0.05 equiv) was added to a solution of the alkene **23** [12.0 mg, 24.1  $\mu\text{mol}$ , 1 equiv; dried by azeotropic distillation with benzene ( $3 \times 1.0$  mL)] in dichloromethane (1.2 mL) at 22 °C. The reaction vessel was purged with dihydrogen and placed under a balloon of dihydrogen. The reaction mixture was stirred for 1 h at 22 °C. The product mixture was concentrated. The residue obtained was purified by flash-column chromatography (eluting with 10% ethyl acetate–hexanes initially, grading to 50% ethyl acetate–hexanes, three steps) to provide the reduction product **35** as a clear oil (11.2 mg, 93%).

Within the limits of detection (600 MHz  $^1\text{H}$  NMR analysis), **35** was formed as a single diastereomer. NOE correlations between H14 and H1, as well as X-ray analysis of the mutilin derivative **26** (see page S163), support the relative stereochemical assignment depicted.

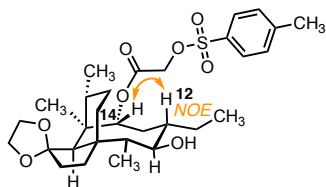

$R_f = 0.44$  (40% ethyl acetate–hexanes; PAA).  $^1\text{H}$  NMR (600 MHz,  $\text{CDCl}_3$ )  $\delta$  7.83 (d,  $J = 8.1$  Hz, 2H, H<sub>24</sub>), 7.35 (d,  $J = 7.9$  Hz, 2H, H<sub>25</sub>), 5.34 (d,  $J = 8.2$  Hz, 1H, H<sub>14</sub>), 4.52 (s, 2H, H<sub>21</sub>), 4.07 – 4.01 (m, 1H, H<sub>22a</sub> or 23a), 3.94 – 3.85 (m, 2H, H<sub>22b</sub>, H<sub>23b</sub>), 3.80 – 3.73 (m, 1H, H<sub>22a</sub> or 23a), 3.34 (dd,  $J = 10.1, 6.8$  Hz, 1H, H<sub>11</sub>), 2.45 (s, 3H, H<sub>26</sub>), 2.24 (h,  $J = 7.2$  Hz, 1H, H<sub>6</sub>), 2.12 (p,  $J = 7.1, 6.5$  Hz, 1H, H<sub>10</sub>), 1.96 (s, 1H, H<sub>4</sub>), 1.93 – 1.77 (m, 3H, H<sub>2</sub>, H<sub>13a</sub>), 1.77 – 1.66 (m, 2H, H<sub>12</sub>, H<sub>19a</sub>), 1.60 – 1.53 (m, 2H, H<sub>8</sub>), 1.42 (dt,  $J = 13.2, 10.5$  Hz, 1H, H<sub>1a</sub>), 1.38 – 1.24 (m, 5H, H<sub>1b</sub>, H<sub>7</sub>, H<sub>13b</sub>, H<sub>19b</sub>), 1.05 (s, 3H, H<sub>15</sub>), 0.90 (d,  $J = 7.0$  Hz, 3H, H<sub>17</sub>), 0.87 (t,  $J = 7.5$  Hz, 3H, H<sub>20</sub>), 0.62 (d,  $J = 7.1$  Hz, 3H, H<sub>16</sub>).  $^{13}\text{C}$  NMR (150 MHz,  $\text{CDCl}_3$ )  $\delta$  165.6 (C), 145.2 (C), 132.7 (C), 129.9 (2  $\times$  CH), 128.1 (2  $\times$  CH), 120.4 (C), 76.2 (CH), 71.5 (CH), 65.2 (CH<sub>2</sub>), 63.8 (CH<sub>2</sub>), 61.5 (CH<sub>2</sub>), 50.9 (CH), 47.8 (CH), 46.1 (C), 41.6 (C), 40.0 (CH), 36.5 (CH<sub>2</sub>), 35.8 (CH<sub>2</sub>), 35.5 (CH), 29.2 (CH<sub>2</sub>), 28.7 (CH<sub>2</sub>), 27.1 (CH<sub>2</sub>), 25.7 (CH<sub>2</sub>), 21.7 (CH<sub>3</sub>), 17.5 (CH<sub>3</sub>), 14.6 (CH<sub>3</sub>), 11.5 (CH<sub>3</sub>), 10.5 (CH<sub>3</sub>). IR (AT-FTIR),  $\text{cm}^{-1}$ : 2938 (m), 2879 (w), 2361 (w), 1752 (w), 1372 (m), 1177 (s), 1035 (m). HRMS-ESI ( $m/z$ ):  $[\text{M} + \text{Na}]^+$  calcd for  $[\text{C}_{30}\text{H}_{44}\text{NaO}_8\text{S}]^+$  587.2655; found 587.2641.  $[\alpha]_D^{20} = -4.19$  ( $c = 0.172$ ,  $\text{CHCl}_3$ ).

### Synthesis of the normethyl derivative **24**.

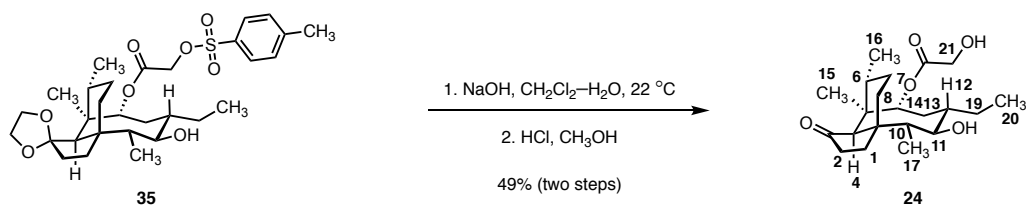

Aqueous sodium hydroxide solution (2 N, 28.0  $\mu$ L, 56.0  $\mu$ mol, 10.0 equiv) was added to a solution of the sulfonate **35** (3.20 mg, 5.60  $\mu$ mol, 1 equiv) in dichloromethane (200  $\mu$ L) at 22 °C. The reaction mixture was stirred for 72 h at 22 °C. The product mixture was concentrated. The residue obtained was used directly in the following step.

Aqueous hydrochloric acid solution (12 N, 9.30  $\mu$ L, 112  $\mu$ mol, 20.0 equiv) was added to a solution of the product obtained in the preceding step (nominally, 5.60  $\mu$ mol, 1 equiv) in methanol (200  $\mu$ L) at 22 °C. The reaction mixture was stirred for 12 h at 22 °C. The product mixture was diluted sequentially with ethyl acetate (1.0 mL) and saturated aqueous sodium bicarbonate solution (1.0 mL). The resulting biphasic mixture was transferred to a borosilicate test tube and the layers that formed were separated. The aqueous layer was extracted with ethyl acetate (2  $\times$  1.0 mL). The organic layers were combined and the combined organic layers were washed sequentially with water (1.0 mL) and saturated aqueous sodium chloride solution (1.0 mL). The washed organic layer was dried over magnesium sulfate. The dried solution was filtered and the filtrate was concentrated. The residue obtained was purified by flash-column chromatography (eluting with 30% ethyl acetate–hexanes initially, grading to 60% ethyl acetate–hexanes, two steps) to provide the normethyl derivative **24** as a clear oil (1.00 mg, 49% over two steps).

$R_f$  = 0.54 (50% ethyl acetate–hexanes; PAA). <sup>1</sup>H NMR (500 MHz, CDCl<sub>3</sub>)  $\delta$  5.47 (d,  $J$  = 6.7 Hz, 1H, H<sub>14</sub>), 4.08 (qd,  $J$  = 17.1, 5.3 Hz, 2H, H<sub>21</sub>), 3.40 (s, 1H, H<sub>11</sub>), 2.42 – 2.12 (m, 4H, H<sub>2</sub>, H<sub>10</sub>, OH), 2.04 (d,  $J$  = 2.7 Hz, 1H, H<sub>4</sub>), 1.88 – 1.57 (m, 6H, H<sub>1a</sub>, H<sub>6</sub>, H<sub>8a</sub>, H<sub>12</sub>, H<sub>13a</sub>, H<sub>19a</sub>), 1.46 – 1.36 (m, 8H, H<sub>1b</sub>, H<sub>7</sub>, H<sub>15</sub>, H<sub>13b</sub>, H<sub>19a</sub>), 1.14 (td,  $J$  = 13.9, 4.5 Hz, 1H, H<sub>8b</sub>), 1.01 (d,  $J$  = 7.0 Hz, 3H, H<sub>17</sub>), 0.90 (t,  $J$  = 7.5 Hz, 3H, H<sub>20</sub>), 0.73 (d,  $J$  = 7.1 Hz, 3H, H<sub>16</sub>). <sup>13</sup>C NMR (125 MHz, CDCl<sub>3</sub>)  $\delta$  217.1 (C), 173.0 (C), 74.5 (CH), 71.8 (CH), 61.4 (CH<sub>2</sub>), 58.3 (CH), 47.5 (CH), 45.7 (C), 41.8 (C), 41.0 (CH), 36.8 (CH), 36.6 (CH<sub>2</sub>), 34.5 (CH<sub>2</sub>), 30.7 (CH<sub>2</sub>), 27.2 (CH<sub>2</sub>), 25.9 (CH<sub>2</sub>), 25.6 (CH<sub>2</sub>), 17.4 (CH<sub>3</sub>), 15.1 (CH<sub>3</sub>), 11.4 (CH<sub>3</sub>), 10.3 (CH<sub>3</sub>). IR (AT-FTIR), cm<sup>-1</sup>: 3730 (w), 3383 (w), 2361 (s), 2341 (s), 1718 (w), 1648 (w), 669 (w). HRMS-ESI (m/z): [M + H]<sup>+</sup> calcd for [C<sub>21</sub>H<sub>35</sub>O<sub>5</sub>]<sup>+</sup> 367.2484; found 367.2479.

### Synthesis of the mutilin derivative **26**.

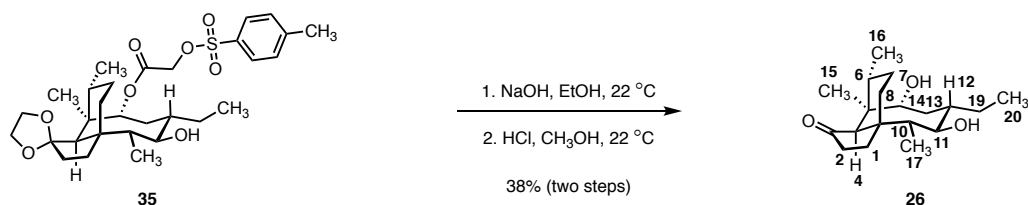

Aqueous sodium hydroxide solution (2 N, 35.0  $\mu$ L, 69.1  $\mu$ mol, 10.0 equiv) was added to a solution of the sulfonate **35** (3.90 mg, 6.90  $\mu$ mol, 1 equiv) in ethanol (200  $\mu$ L) at 22 °C. The reaction mixture was stirred for 12 h at 22 °C. The product mixture was concentrated. The residue obtained was used directly in the following step.

Aqueous hydrochloric acid solution (12 N, 5.80  $\mu$ L, 69.1  $\mu$ mol, 10.0 equiv) was added to a solution of the unpurified product obtained in the preceding step (nominally, 6.90  $\mu$ mol, 1 equiv) in methanol (200  $\mu$ L) at 22 °C. The reaction mixture was stirred for 12 h at 22 °C. The product mixture was diluted sequentially with ethyl acetate (1.0 mL) and saturated aqueous sodium bicarbonate solution (1.0 mL). The resulting biphasic mixture was transferred to a borosilicate test tube and the layers that formed were separated. The aqueous layer was extracted with ethyl acetate (2  $\times$  1.0 mL). The organic layers were combined and the combined organic layers were washed sequentially with water (1.0 mL) and saturated aqueous sodium chloride solution (1.0 mL). The washed organic layer was dried over magnesium sulfate. The dried solution was filtered and the filtrate was concentrated. The residue obtained was purified by flash-column chromatography (eluting with 30% ethyl acetate–hexanes initially, grading to 60% ethyl acetate–hexanes, two steps) to provide the mutilin derivative **26** as white solid (830  $\mu$ g, 38% over two steps).

The relative stereochemistry of the mutilin derivative **26** was established by X-ray analysis (see page S163).

$R_f$  = 0.53 (50% ethyl acetate–hexanes; PAA). <sup>1</sup>H NMR (600 MHz, CDCl<sub>3</sub>)  $\delta$  4.37 – 4.22 (m, 1H, H<sub>14</sub>), 3.40 (dt,  $J$  = 10.0, 6.4 Hz, 1H, H<sub>11</sub>), 2.28 – 2.14 (m, 3H, H<sub>2</sub>, H<sub>10</sub>), 2.02 – 1.99 (m, 1H, H<sub>4</sub>), 1.84 – 1.73 (m, 3H, H<sub>8a</sub>, H<sub>13a</sub>, H<sub>19a</sub>), 1.71 – 1.45 (m, 6H, H<sub>1</sub>, H<sub>6</sub>, H<sub>7a</sub>, H<sub>12</sub>, H<sub>13b</sub>), 1.43 – 1.35 (m, 5H, H<sub>7b</sub>, H<sub>15</sub>, H<sub>19b</sub>), 1.33 – 1.29 (m, 2H, 2  $\times$  OH), 1.14 (td,  $J$  = 14.0, 4.3 Hz, 1H, H<sub>8b</sub>), 1.00 – 0.95 (m, 6H, H<sub>16</sub>, H<sub>17</sub>), 0.94 (td,  $J$  = 7.5, 1.0 Hz, 3H, H<sub>20</sub>). <sup>13</sup>C NMR (150 MHz, CDCl<sub>3</sub>)  $\delta$  217.9 (C), 72.0 (CH), 70.5 (CH), 59.1 (CH), 48.2 (CH), 45.7 (C), 42.9 (C), 40.8 (CH), 39.1 (CH<sub>2</sub>), 37.1 (CH), 34.6 (CH<sub>2</sub>), 30.8 (CH<sub>2</sub>), 27.3 (CH<sub>2</sub>), 26.2 (CH<sub>2</sub>), 25.6 (CH<sub>2</sub>), 18.4 (CH<sub>3</sub>), 13.6 (CH<sub>3</sub>), 11.2 (CH<sub>3</sub>), 10.5 (CH<sub>3</sub>). IR (AT-FTIR), cm<sup>-1</sup>: 3401 (w), 2923 (w), 2357 (m), 1725 (m), 662 (w). HRMS-ESI ( $m/z$ ): [M + H]<sup>+</sup> calcd for [C<sub>19</sub>H<sub>33</sub>O<sub>3</sub>]<sup>+</sup> 309.2430; found 309.2420.



Synthesis of the homopropargylic alcohol **S7**.

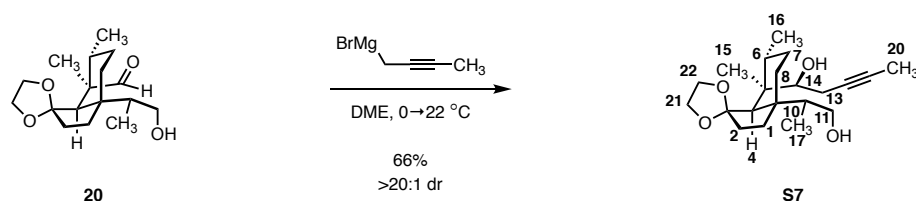

A solution of (1-but-2-ynyl)magnesium bromide in ether (30 mM, 1.6 mL, 486  $\mu\text{mol}$ , 3.00 equiv) was added dropwise to a solution of the aldehyde **20** [60.0 mg, 162  $\mu\text{mol}$ , 1 equiv; dried by azeotropic distillation with benzene ( $3 \times 1.0$  mL)] in dimethoxyethane (2.3 mL) at 0 °C. The reaction mixture was allowed to warm to 22 °C over 10 min. The warmed reaction mixture was stirred for 20 min at 22 °C. The product mixture was diluted sequentially with saturated aqueous ammonium chloride solution (2.0 mL) and water (1.0 mL). The resulting biphasic mixture was transferred to a separatory funnel and the layers that formed were separated. The aqueous layer was extracted with ethyl acetate ( $2 \times 3.0$  mL). The organic layers were combined and the combined organic layers were washed with saturated aqueous sodium chloride solution (6.0 mL). The washed organic layer was dried over magnesium sulfate. The dried solution was filtered and the filtrate was concentrated. The residue obtained was purified by flash-column chromatography (eluting with 15% ethyl acetate–hexanes initially, grading to 30% ethyl acetate–hexanes, four steps) to provide the homopropargylic alcohol **S7** as an off-white foam (37.0 mg, 66%).

Within the limits of detection (500 MHz  $^1\text{H}$  NMR analysis), the homopropargylic alcohol **S7** was formed as a single diastereomer. The relative stereochemistry was determined by comparison of  $^3J_{\text{H-H}}$  coupling constants to the diastereomeric addition product **21**.

$R_f = 0.32$  (50% ethyl acetate–hexanes; PAA).  $^1\text{H}$  NMR (500 MHz,  $\text{C}_6\text{D}_6$ )  $\delta$  4.00 (dd,  $J = 9.0, 3.0$  Hz, 1H, H<sub>14</sub>), 3.89 (ddd,  $J = 13.8, 9.4, 4.1$  Hz, 1H, H<sub>11a</sub>), 3.52 (ddt,  $J = 10.4, 6.1, 3.7$  Hz, 1H, H<sub>21a</sub> or 22a), 3.48 – 3.29 (m, 3H, H<sub>21a</sub> or 22a, H<sub>21b</sub>, H<sub>22b</sub>), 3.24 (ddd,  $J = 10.1, 7.0, 2.7$  Hz, 1H, H<sub>11b</sub>), 2.98 (s, 1H, H<sub>4</sub>), 2.57 (dq,  $J = 16.5, 2.7$  Hz, 1H, H<sub>13a</sub>), 2.47 (dtt,  $J = 19.7, 7.2, 2.9$  Hz, 2H, H<sub>10</sub>, H<sub>13b</sub>), 2.14 (ddq,  $J = 11.6, 8.0, 4.1$  Hz, 1H, H<sub>6</sub>), 1.66 (dddd,  $J = 27.1, 21.0, 10.2, 6.5$  Hz, 4H, H<sub>1</sub>, H<sub>2</sub>), 1.48 (d,  $J = 2.6$  Hz, 5H, H<sub>7a</sub>, H<sub>8a</sub>, H<sub>20</sub>), 1.33 – 1.23 (m, 1H, H<sub>7b</sub>), 1.19 – 1.09 (m, 4H, H<sub>8b</sub>, H<sub>15</sub>), 1.03 – 0.86 (m, 6H, H<sub>16</sub>, H<sub>17</sub>).  $^{13}\text{C}$  NMR (150 MHz,  $\text{C}_6\text{D}_6$ )  $\delta$  120.8 (C), 83.6 (C), 74.3 (CH), 70.5 (C), 66.7 (CH<sub>2</sub>), 63.5 (CH<sub>2</sub>), 61.9 (CH<sub>2</sub>), 47.7 (CH), 45.8 (C), 43.5 (C), 39.4 (CH), 38.9 (CH), 35.4 (CH<sub>2</sub>), 33.0 (CH<sub>2</sub>), 29.7 (CH<sub>2</sub>), 28.0 (CH<sub>2</sub>), 25.7 (CH<sub>2</sub>), 20.6 (CH<sub>3</sub>), 18.8 (CH<sub>3</sub>), 17.8 (CH<sub>3</sub>), 14.7 (CH<sub>3</sub>). IR (AT-FTIR),  $\text{cm}^{-1}$ : 2953 (w), 1715 (m), 1396 (w). HRMS-ESI (m/z):  $[\text{M} + \text{Na}]^+$  calcd for  $[\text{C}_{21}\text{H}_{34}\text{O}_4\text{Na}]^+$  373.2355; found 373.2356.

### Synthesis of the homopropargylic alcohol **27**.

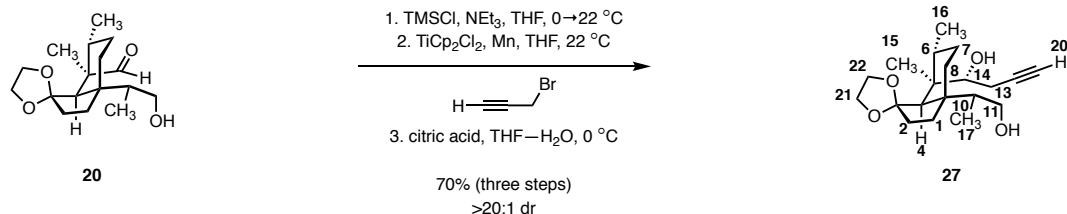

Trimethylsilyl chloride (45.0  $\mu$ L, 355  $\mu$ mol, 1.10 equiv) was added dropwise over 1 min to a solution of triethylamine (90.0  $\mu$ L, 646  $\mu$ mol, 2.00 equiv) and the aldehyde **20** (96.0 mg, 323  $\mu$ mol, 1 equiv) in tetrahydrofuran (3.2 mL) at 0 °C. The reaction mixture was allowed to warm to 22 °C over 2 h. The product mixture was cooled to 0 °C over 10 min. The cooled product mixture was diluted sequentially with ether (4.0 mL) and aqueous potassium phosphate buffer solution (pH 7, 2.0 mL). The resulting biphasic mixture was transferred to a separatory funnel and the layers that formed were separated. The aqueous layer was extracted with ether (2  $\times$  3.0 mL). The organic layers were combined and the combined organic layers were washed with saturated aqueous sodium chloride solution (5.0 mL). The washed organic layer was dried over magnesium sulfate. The dried solution was filtered and the filtrate was concentrated. The residue obtained was used directly in the following step.

A mixture of bis(cyclopentadienyl)titanium(IV) dichloride (241 mg, 969  $\mu$ mol, 3.00 equiv) and manganese powder (213 mg, 3.87 mmol, 12.0 equiv) in tetrahydrofuran (4.0 mL) was stirred vigorously at 22 °C until a light green color persisted (approximately 30 min). A solution of propargyl bromide in toluene (80% w/w, 122  $\mu$ L, 1.29 mmol, 4.00 equiv) and the protected alcohol obtained in the preceding step (nominally 323  $\mu$ mol, 1 equiv) in tetrahydrofuran (4.0 mL) was then added dropwise over 2 min at 22 °C. The reaction mixture was stirred for 15 min at 22 °C. The product mixture was diluted with hexanes (8.0 mL). The diluted product mixture was eluted over a plug of silica gel (2.0 cm  $\times$  2.0 cm, eluting with 30% ether–hexanes). The filtrates were combined and the combined filtrates were concentrated. The residue obtained was used directly in the following step.

Aqueous citric acid solution (10% w/v, 400  $\mu$ L) was added dropwise to a solution of the unpurified addition product obtained in the preceding step (nominally 323  $\mu$ mol, 1 equiv) in tetrahydrofuran (1.0 mL) at 0 °C. The reaction mixture was stirred for 30 min at 0 °C. The product mixture was diluted sequentially with ethyl acetate (3.0 mL) and saturated aqueous sodium bicarbonate solution (3.0 mL). The resulting biphasic mixture was transferred to a separatory funnel and the layers that formed were separated. The aqueous layer was extracted with ethyl acetate (4  $\times$  4.0 mL). The organic layers were combined and the combined organic layers were washed with saturated aqueous sodium chloride solution (10 mL). The washed organic layer was dried over magnesium sulfate. The dried solution was filtered and the filtrate was concentrated. The residue obtained was purified by flash-column chromatography (eluting with 15% ethyl acetate–hexanes initially, grading to 30% ethyl acetate–hexanes, four steps) to provide the homopropargylic alcohol **27** as an off-white foam (75.0 mg, 70% over three steps).

Within the limits of detection (500 MHz  $^1\text{H}$  NMR analysis), the homopropargylic alcohol **27** was formed as a single diastereomer. The relative stereochemistry was determined by comparison to the diastereomeric homopropargylic alcohol **21**.

$R_f = 0.41$  (50% ethyl acetate–hexanes; PAA).  $^1\text{H}$  NMR (600 MHz,  $\text{C}_6\text{D}_6$ )  $\delta$  4.23 (ddd,  $J = 10.5, 3.8, 2.2$  Hz, 1H,  $\text{H}_{14}$ ), 3.60 (dd,  $J = 10.4, 3.1$  Hz, 1H,  $\text{H}_{11a}$ ), 3.55 (q,  $J = 7.4$  Hz, 1H,  $\text{H}_{21a}$  or  $22a$ ), 3.43 (td,  $J = 7.4, 4.6$  Hz, 1H,  $\text{H}_{21b}$  or  $22b$ ), 3.39 – 3.29 (m, 2H,  $\text{H}_{21a}$  or  $22a, \text{H}_{21b}$  or  $22b$ ), 3.14 (dd,  $J = 10.4, 8.8$  Hz, 1H,  $\text{H}_{11b}$ ), 2.72 (s, 1H,  $\text{H}_4$ ), 2.39 (dt,  $J = 16.6, 2.5$  Hz, 1H,  $\text{H}_{13a}$ ), 2.26 (ddd,  $J = 16.7, 10.5, 2.6$  Hz, 1H,  $\text{H}_{13b}$ ), 2.17 (dtp,  $J = 9.8, 6.3, 3.1$  Hz, 1H,  $\text{H}_{10}$ ), 1.96 – 1.82 (m, 2H,  $\text{H}_2$ ), 1.73 (t,  $J = 2.6$  Hz, 1H,  $\text{H}_{20}$ ), 1.63 – 1.45 (m, 4H,  $\text{H}_{1a}, \text{H}_6, \text{H}_7$ ), 1.45 – 1.36 (m, 1H,  $\text{H}_{1b}$ ), 1.15 – 0.91 (m, 11H,  $\text{H}_8, \text{H}_{15}, \text{H}_{16}, \text{H}_{17}$ ).  $^{13}\text{C}$  NMR (150 MHz,  $\text{C}_6\text{D}_6$ )  $\delta$  121.3 (C), 83.3 (C), 76.0 (CH), 70.2 (CH), 64.8 ( $\text{CH}_2$ ), 63.7 ( $\text{CH}_2$ ), 62.9 ( $\text{CH}_2$ ), 45.9 (C), 45.3 (CH), 42.7 (CH), 41.1 (C), 36.3 (CH), 35.8 ( $\text{CH}_2$ ), 30.6 ( $\text{CH}_2$ ), 25.6 ( $\text{CH}_2$ ), 25.6 ( $\text{CH}_2$ ), 22.4 ( $\text{CH}_2$ ), 20.6 ( $\text{CH}_3$ ), 16.7 ( $\text{CH}_3$ ), 13.0 ( $\text{CH}_3$ ). IR (ATR-FTIR),  $\text{cm}^{-1}$ : 3416 (w), 2937 (m), 2883 (m), 2361 (s), 2339 (s), 1100 (m), 1021 (m), 772 (w). HRMS-ESI ( $m/z$ ):  $[\text{M} + \text{H}]^+$  calcd for  $[\text{C}_{20}\text{H}_{33}\text{O}_4]^+$  337.2379; found 337.2373.  $[\alpha]_D^{20} = -24.8$  ( $c = 0.205, \text{CHCl}_3$ ).

### Synthesis of the homopropargylic alcohol **28**.

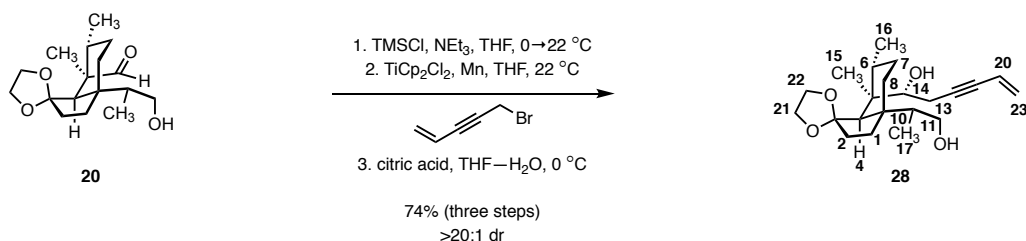

Trimethylsilyl chloride (18.0  $\mu$ L, 141  $\mu$ mol, 1.10 equiv) was added dropwise over 1 min to a solution of triethylamine (303  $\mu$ L, 2.17 mmol, 2.00 equiv) and the aldehyde **20** (36.1 mg, 128  $\mu$ mol, 1 equiv) in tetrahydrofuran (1.3 mL) at 0 °C. The reaction mixture was allowed to warm to 22 °C over 2 h. The product mixture was cooled to 0 °C over 10 min. The cooled product mixture was diluted sequentially with ether (10 mL) and aqueous potassium phosphate buffer solution (pH 7, 10 mL). The resulting biphasic mixture was transferred to a separatory funnel and the layers that formed were separated. The aqueous layer was extracted with ether (2  $\times$  10 mL). The organic layers were combined and the combined organic layers were washed with saturated aqueous sodium chloride solution (10 mL). The washed organic layer was dried over magnesium sulfate. The dried solution was filtered and the filtrate was concentrated. The residue obtained was used directly in the following step.

A mixture of bis(cyclopentadienyl)titanium(IV) dichloride (95.2 mg, 383  $\mu$ mol, 3.00 equiv) and manganese powder (84.1 mg, 1.53 mmol, 12.0 equiv) in tetrahydrofuran (650  $\mu$ L) was stirred vigorously at 22 °C until a light green color persisted (approximately 30 min). A solution of the protected alcohol obtained in the preceding step (nominally 128  $\mu$ mol, 1 equiv) and 5-bromopent-1-en-3-yne (76.1 mg, 446  $\mu$ mol, 3.50 equiv) in tetrahydrofuran (650  $\mu$ L) was added dropwise over 5 min at 22 °C. The reaction mixture was stirred for 30 min at 22 °C. The product mixture was diluted with hexanes (1.0 mL). The diluted product mixture was eluted over a plug of silica gel (1.0 cm  $\times$  1.0 cm, eluting with 30% ether–hexanes). The filtrates were combined and the combined filtrates were concentrated. The residue obtained was used directly in the following step.

Aqueous citric acid solution (10% w/v, 200  $\mu$ L) was added dropwise to a solution of the addition product obtained in the preceding step (nominally 128  $\mu$ mol, 1 equiv) in tetrahydrofuran (2.0 mL) at 0 °C. The reaction mixture was stirred for 30 min at 0 °C. The product mixture was diluted sequentially with ethyl acetate (4.0 mL) and saturated aqueous sodium bicarbonate solution (4.0 mL). The resulting biphasic mixture was transferred to a separatory funnel and the layers that formed were separated. The aqueous layer was extracted with ethyl acetate (4  $\times$  6.0 mL). The organic layers were combined and the combined organic layers were washed with saturated aqueous sodium chloride solution (9.0 mL). The washed organic layer was dried over magnesium sulfate. The dried solution was filtered and the filtrate was concentrated. The residue obtained was purified by flash-column chromatography (eluting with 15% ethyl acetate–hexanes initially, grading to 30% ethyl acetate–hexanes, four steps) to provide the homopropargylic alcohol **28** as a yellow foam (34.0 mg, 74% over three steps).

Within the limits of detection (500 MHz  $^1\text{H}$  NMR analysis), the homopropargylic alcohol **28** was formed as a single diastereomer. The relative stereochemistry was determined by comparison to the diastereomeric homopropargylic alcohol **21**.

$R_f = 0.34$  (50% ethyl acetate–hexanes; PAA).  $^1\text{H}$  NMR (600 MHz,  $\text{C}_6\text{D}_6$ )  $\delta$  5.70 (ddt,  $J = 17.6, 11.0, 2.2$  Hz, 1H,  $\text{H}_{20}$ ), 5.54 (dd,  $J = 17.5, 2.2$  Hz, 1H,  $\text{H}_{23a}$ ), 5.12 (dd,  $J = 11.1, 2.2$  Hz, 1H,  $\text{H}_{23b}$ ), 4.27 (dt,  $J = 10.5, 2.6$  Hz, 1H,  $\text{H}_{14}$ ), 3.61 (dd,  $J = 10.4, 3.0$  Hz, 1H,  $\text{H}_{11a}$ ), 3.54 (q,  $J = 7.3$  Hz, 1H,  $\text{H}_{20a}$  or  $21a$ ), 3.42 (td,  $J = 7.4, 4.5$  Hz, 1H,  $\text{H}_{20b}$  or  $21b$ ), 3.37 – 3.26 (m, 2H,  $\text{H}_{20a}$  or  $21a, \text{H}_{20b}$  or  $21b$ ), 3.15 (dd,  $J = 10.4, 8.8$  Hz, 1H,  $\text{H}_{11b}$ ), 2.74 (s, 1H,  $\text{H}_4$ ), 2.59 (dt,  $J = 16.8, 2.4$  Hz, 1H,  $\text{H}_{13a}$ ), 2.46 (ddd,  $J = 16.8, 10.4, 2.2$  Hz, 1H,  $\text{H}_{13b}$ ), 2.18 (dq,  $J = 9.5, 6.6, 2.9$  Hz, 1H,  $\text{H}_{10}$ ), 1.97 – 1.84 (m, 2H,  $\text{H}_2$ ), 1.67 – 1.35 (m, 5H,  $\text{H}_1, \text{H}_6, \text{H}_{7a}, \text{H}_{8a}$ ), 1.20 – 1.06 (m, 11H,  $\text{H}_{7b}, \text{H}_{8b}, \text{H}_{15}, \text{H}_{16}, \text{H}_{17}$ ).  $^{13}\text{C}$  NMR (150 MHz,  $\text{C}_6\text{D}_6$ )  $\delta$  126.2 ( $\text{CH}_2$ ), 121.7 (C), 117.9 (CH), 90.3 (C), 81.7 (C), 76.5 (CH), 65.3 ( $\text{CH}_2$ ), 64.1 ( $\text{CH}_2$ ), 63.3 ( $\text{CH}_2$ ), 46.4 (C), 45.7 (CH), 43.1 (CH), 41.6 (C), 36.8 (CH), 36.2 ( $\text{CH}_2$ ), 31.0 ( $\text{CH}_2$ ), 30.2 ( $\text{CH}_2$ ), 26.0 ( $\text{CH}_2$ ), 23.8 ( $\text{CH}_2$ ), 21.1 ( $\text{CH}_3$ ), 17.2 ( $\text{CH}_3$ ), 13.4 ( $\text{CH}_3$ ). IR (ATR-FTIR),  $\text{cm}^{-1}$ : 2940 (w), 2362 (m), 2343 (m), 1541 (w), 1020 (w), 773 (m). HRMS-ESI ( $m/z$ ):  $[\text{M} + \text{Na}]^+$  calcd for  $[\text{C}_{22}\text{H}_{34}\text{NaO}_4]^+$  385.2355; found 385.2346.  $[\alpha]_D^{20} = -3.68$  ( $c = 0.200, \text{CHCl}_3$ ).

### Synthesis of the homopropargylic alcohol **29**.

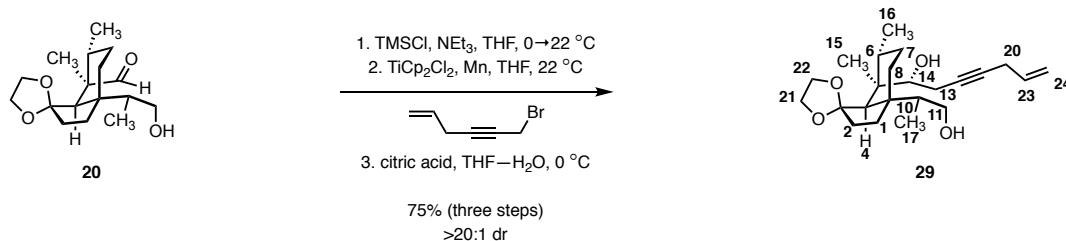

Trimethylsilyl chloride (88.0  $\mu$ L, 695  $\mu$ mol, 1.10 equiv) was added dropwise over 1 min to a solution of triethylamine (176  $\mu$ L, 1.26 mmol, 2.00 equiv) and the aldehyde **20** (187 mg, 632  $\mu$ mol, 1 equiv) in tetrahydrofuran (6.3 mL) at 0 °C. Upon completion of the addition the cooling bath was removed and the reaction mixture was allowed to warm to 22 °C over 2 h. The product mixture was cooled to 0 °C over 10 min. The cooled product mixture was diluted sequentially with ether (6.0 mL) and aqueous potassium phosphate buffer solution (pH 7, 5.0 mL). The resulting biphasic mixture was transferred to a separatory funnel and the layers that formed were separated. The aqueous layer was extracted with ether (2  $\times$  6.0 mL). The organic layers were combined and the combined organic layers were washed with saturated aqueous sodium chloride solution (10 mL). The washed organic layer was dried over magnesium sulfate. The dried solution was filtered and the filtrate was concentrated. The residue obtained was used directly in the following step.

A mixture of bis(cyclopentylidienyl)titanium(IV) dichloride (488 mg, 1.89 mmol, 3.00 equiv) and manganese powder (417 mg, 7.58 mmol, 12.0 equiv) in tetrahydrofuran (4.5 mL) was stirred vigorously at 22 °C until a light green color persisted (approximately 30 min). A solution of 6-bromohex-1-en-4-yne (503 mg, 2.21 mmol, 3.50 equiv) and the protected alcohol obtained in the preceding step (nominally 632  $\mu$ mol, 1 equiv) in tetrahydrofuran (4.5 mL) was added dropwise over 1 h at 22 °C. The reaction mixture was stirred for 4 h at 22 °C. The product mixture was diluted with hexanes (6.0 mL). The diluted product mixture was eluted over a plug of silica gel (2.0 cm  $\times$  2.0 cm, eluting with 30% ether–hexanes). The filtrates were combined and the combined filtrates were concentrated. The residue obtained was used directly in the following step.

Aqueous citric acid solution (10% w/v, 900  $\mu$ L) was added dropwise to a solution of the addition product obtained in the preceding step (nominally 632  $\mu$ mol, 1 equiv) in tetrahydrofuran (2.0 mL) at 0 °C. The reaction mixture was stirred for 30 min at 0 °C. The product mixture was diluted sequentially with ethyl acetate (4.0 mL) and saturated aqueous sodium bicarbonate solution (4.0 mL). The resulting biphasic mixture was transferred to a separatory funnel and the layers that formed were separated. The aqueous layer was extracted with ethyl acetate (4  $\times$  5.0 mL). The organic layers were combined and the combined organic layers were washed with saturated aqueous sodium chloride solution (15 mL). The washed organic layer was dried over magnesium sulfate. The dried solution was filtered and the filtrate was concentrated. The residue obtained was purified by flash-column chromatography (eluting with 15% ethyl acetate–hexanes initially, grading to 30% ethyl acetate–hexanes, four steps) to provide the homopropargylic alcohol **29** as an off-white foam (178 mg, 75% over three steps).

Within the limits of detection (500 MHz  $^1\text{H}$  NMR analysis), the homopropargylic alcohol **29** was formed as a single diastereomer. The relative stereochemistry was determined by comparison to the diastereomeric homopropargylic alcohol **21**.

$R_f = 0.44$  (50% ethyl acetate–hexanes; PAA).  $^1\text{H}$  NMR (600 MHz,  $\text{C}_6\text{D}_6$ )  $\delta$  5.64 (ddt,  $J = 16.9, 10.1, 5.2$  Hz, 1H,  $\text{H}_{23}$ ), 5.37 (dq,  $J = 17.0, 1.9$  Hz, 1H,  $\text{H}_{24a}$ ), 5.02 (dq,  $J = 10.0, 1.8$  Hz, 1H,  $\text{H}_{24b}$ ), 4.29 (dt,  $J = 10.6, 2.8$  Hz, 1H,  $\text{H}_{14}$ ), 3.66 – 3.55 (m, 2H,  $\text{H}_{11a}, \text{H}_{21a}$  or  $22a$ ), 3.48 – 3.41 (m, 2H,  $\text{H}_{21b}, \text{H}_{22b}$ ), 3.39 – 3.33 (m, 1H,  $\text{H}_{21a}$  or  $22a$ ), 3.19 – 3.12 (m, 1H,  $\text{H}_{11b}$ ), 2.77 (s, 1H,  $\text{H}_4$ ), 2.72 (dt,  $J = 5.2, 2.1$  Hz, 2H,  $\text{H}_{20}$ ), 2.53 (dq,  $J = 16.5, 2.4$  Hz, 1H,  $\text{H}_{13a}$ ), 2.40 (ddt,  $J = 16.4, 10.6, 2.4$  Hz, 1H,  $\text{H}_{13b}$ ), 2.20 (ddp,  $J = 9.5, 6.6, 3.3$  Hz, 1H,  $\text{H}_{10}$ ), 1.99 (d,  $J = 3.6$  Hz, 1H, OH), 1.96 – 1.85 (m, 2H,  $\text{H}_2$ ), 1.65 – 1.49 (m, 4H,  $\text{H}_{1a}, \text{H}_6, \text{H}_7$ ), 1.46 – 1.38 (m, 1H,  $\text{H}_{1b}$ ), 1.18 – 0.96 (m, 11H,  $\text{H}_8, \text{H}_{15}, \text{H}_{16}, \text{H}_{17}$ ).  $^{13}\text{C}$  NMR (150 MHz,  $\text{C}_6\text{D}_6$ )  $\delta$  133.0 (CH), 121.4 (C), 115.4 ( $\text{CH}_2$ ), 81.5 (C), 78.8 (C), 76.1 (CH), 64.9 ( $\text{CH}_2$ ), 63.8 ( $\text{CH}_2$ ), 62.9 ( $\text{CH}_2$ ), 46.0 (C), 45.4 (CH), 42.7 (CH), 41.1 (C), 36.5 (CH), 35.8 ( $\text{CH}_2$ ), 30.6 ( $\text{CH}_2$ ), 25.7 ( $\text{CH}_2$ ), 25.7 ( $\text{CH}_2$ ), 22.9 ( $\text{CH}_2$ ), 22.8 ( $\text{CH}_2$ ), 20.6 ( $\text{CH}_3$ ), 16.9 ( $\text{CH}_3$ ), 13.0 ( $\text{CH}_3$ ). IR (ATR-FTIR),  $\text{cm}^{-1}$ : 3417 (w), 2947 (m), 2360 (s), 2332 (m), 1456 (w), 1100 (m), 1019 (m), 772 (w). HRMS-ESI ( $m/z$ ):  $[\text{M} + \text{H}]^+$  calcd for  $[\text{C}_{23}\text{H}_{37}\text{O}_4]^+$  377.2692; found 377.2686.  $[\alpha]_D^{20} = -972.3$  ( $c = 0.200, \text{CHCl}_3$ ).

### Synthesis of the homopropargylic alcohol **30**.

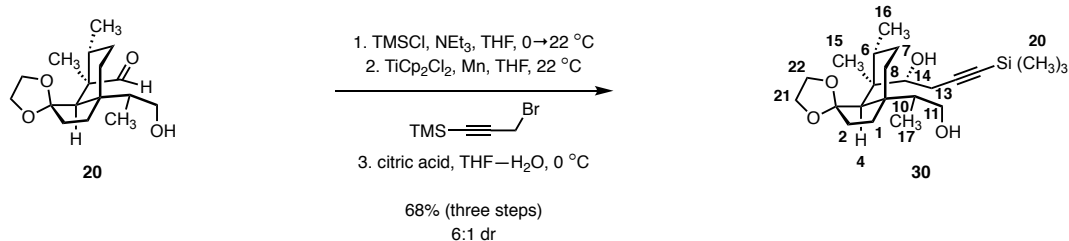

Trimethylsilyl chloride (6.00  $\mu$ L, 44.8  $\mu$ mol, 1.10 equiv) was added dropwise over 1 min to a solution of triethylamine (11.0  $\mu$ L, 81.4  $\mu$ mol, 2.00 equiv) and the aldehyde **20** (12.0 mg, 40.7  $\mu$ mol, 1 equiv) in tetrahydrofuran (400  $\mu$ L) at 0 °C. Upon completion of the addition, the cooling bath was removed and the reaction mixture was allowed to warm to 22 °C over 2 h. The product mixture was cooled to 0 °C over 10 min and the cooled product mixture was diluted sequentially with ether (1.0 mL) and aqueous potassium phosphate buffer solution (pH 7, 1.0 mL). The resulting biphasic mixture was transferred to a separatory funnel and the layers that formed were separated. The aqueous layer was extracted with ether (2  $\times$  1.0 mL). The organic layers were combined and the combined organic layers were washed with saturated aqueous sodium chloride solution (2.0 mL). The washed organic layer was dried over magnesium sulfate. The dried solution was filtered and the filtrate was concentrated. The residue obtained was used directly in the following step.

A mixture of bis(cyclopentadienyl)titanium(IV) dichloride (30.4 mg, 122  $\mu$ mol, 3.00 equiv) and manganese powder (26.8 mg, 488  $\mu$ mol, 12.0 equiv) in tetrahydrofuran (250  $\mu$ L) was stirred vigorously at 22 °C until a light green color persisted (approximately 30 min). A solution of (3-bromoprop-1-yn-1-yl)trimethylsilane (38.9 mg, 162  $\mu$ mol, 3.50 equiv) and the protected alcohol obtained in the preceding step (nominally 40.7  $\mu$ mol, 1 equiv) in tetrahydrofuran (250  $\mu$ L) was added dropwise over 1 h at 22 °C. The reaction mixture was stirred for 4 h at 22 °C. The product mixture was diluted with hexanes (1.0 mL). The diluted product mixture was eluted over a plug of silica gel (1.0 cm  $\times$  1.0 cm, eluting with 30% ether–hexanes). The filtrates were combined and the combined filtrates were concentrated. The residue obtained was used directly in the following step.

Aqueous citric acid solution (10% w/v, 100  $\mu$ L) was added dropwise to a solution of the addition product obtained in the preceding step (nominally 40.7  $\mu$ mol, 1 equiv) in tetrahydrofuran (500  $\mu$ L) at 0 °C. The reaction mixture was stirred for 30 min at 0 °C. The product mixture was diluted sequentially with ethyl acetate (1.0 mL) and saturated aqueous sodium bicarbonate solution (1.0 mL). The resulting biphasic mixture was transferred to a separatory funnel and the layers that formed were separated. The aqueous layer was extracted with ethyl acetate (4  $\times$  1.0 mL). The organic layers were combined and the combined organic layers were washed with saturated aqueous sodium chloride solution (1.5 mL). The washed organic layer was dried over magnesium sulfate. The dried solution was filtered and the filtrate was concentrated. The residue obtained was purified by flash-column chromatography (eluting with 15% ethyl acetate–hexanes initially, grading to 30% ethyl acetate–hexanes, four steps) to provide the homopropargylic alcohol **30** as an off-white foam (11.3 mg, 68% over three steps).



$^1\text{H}$  NMR (500 MHz) analysis of the unpurified product mixture indicated the presence of a 6:1 mixture of diastereomers. The relative configuration of the major diastereomer was determined by comparison to the diastereomeric addition product **21**.

$R_f = 0.48$  (50% ethyl acetate–hexanes; PAA).  $^1\text{H}$  NMR (600 MHz,  $\text{C}_6\text{D}_6$ )  $\delta$  4.32 (dt,  $J = 10.3, 3.1$  Hz, 1H,  $\text{H}_{14}$ ), 3.64 (dd,  $J = 10.5, 2.9$  Hz, 1H,  $\text{H}_{11a}$ ), 3.58 – 3.51 (m, 1H,  $\text{H}_{21a}$  or  $22a$ ), 3.45 – 3.37 (m, 2H,  $\text{H}_{21b}$ ,  $\text{H}_{22b}$ ), 3.37 – 3.27 (m, 1H,  $\text{H}_{21a}$  or  $22a$ ), 3.19 – 3.12 (m, 1H,  $\text{H}_{11b}$ ), 2.72 (s, 1H,  $\text{H}_4$ ), 2.55 (dd,  $J = 16.9, 2.4$  Hz, 1H,  $\text{H}_{13a}$ ), 2.42 (dd,  $J = 16.8, 10.4$  Hz, 1H,  $\text{H}_{13b}$ ), 2.18 (tt,  $J = 9.3, 6.5$  Hz, 1H,  $\text{H}_{10}$ ), 2.04 (d,  $J = 3.9$  Hz, 1H, OH), 1.91 – 1.80 (m, 2H,  $\text{H}_2$ ), 1.70 – 1.43 (m, 4H,  $\text{H}_{1a}$ ,  $\text{H}_6$ ,  $\text{H}_7$ ), 1.44 – 1.34 (m, 1H,  $\text{H}_{1b}$ ), 1.16 – 1.00 (m, 11H,  $\text{H}_8$ ,  $\text{H}_{15}$ ,  $\text{H}_{16}$ ,  $\text{H}_{17}$ ), 0.19 (d,  $J = 2.1$  Hz, 9H,  $\text{H}_{20}$ ).  $^{13}\text{C}$  NMR (150 MHz,  $\text{C}_6\text{D}_6$ )  $\delta$  121.7 (C), 107.0 (C), 87.0 (C), 76.1 (CH), 65.3 ( $\text{CH}_2$ ), 64.1 ( $\text{CH}_2$ ), 63.2 ( $\text{CH}_2$ ), 46.4 (C), 46.1 (CH), 43.1 (CH), 41.7 (C), 37.0 (CH), 36.1 ( $\text{CH}_2$ ), 30.9 ( $\text{CH}_2$ ), 26.1 ( $\text{CH}_2$ ), 26.1 ( $\text{CH}_2$ ), 24.5 ( $\text{CH}_2$ ), 20.7 ( $\text{CH}_3$ ), 17.4 ( $\text{CH}_3$ ), 13.4 ( $\text{CH}_3$ ), 0.2 ( $3 \times \text{CH}_3$ ). IR (ATR-FTIR),  $\text{cm}^{-1}$ : 3416 (w), 2955 (m), 2885 (m), 2361 (w), 2172 (w), 1250 (m), 1017 (m), 843 (s). HRMS-ESI ( $m/z$ ):  $[\text{M} + \text{H}]^+$  calcd for  $[\text{C}_{23}\text{H}_{41}\text{O}_4\text{Si}]^+$  409.2774; found 409.2768.  $[\alpha]_D^{20} = -15.0$  ( $c = 0.570$ ,  $\text{CHCl}_3$ ).

Synthesis of (4-bromobut-2-yn-1-yl)trimethylsilane (**S9**).

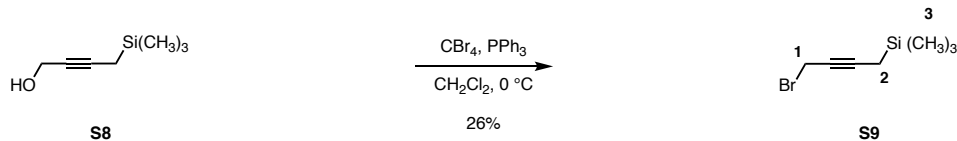

Triphenylphosphine (619 mg, 2.36 mmol, 1.05 equiv) was added in three portions over 30 min to a solution of tetrabromomethane (783 mg, 2.36 mmol, 1.05 equiv) and 4-(trimethylsilyl)but-2-yn-1-ol (**S8**, 320 mg, 2.25 mmol, 1 equiv) in dichloromethane (11 mL) at 0 °C. The reaction mixture was stirred for 2 h at 0 °C. The product mixture was diluted with pentane (50 mL) and the diluted product mixture was filtered through a pad of Celite. The Celite pad was rinsed with pentane (50 mL). The filtrates were combined and the combined filtrates were concentrated. The residue obtained was purified by flash-column chromatography (eluting with pentane) to provide (4-bromobut-2-yn-1-yl)trimethylsilane (**S9**) as a colorless oil (120 mg, 26%).

$R_f = 0.88$  (1% ether–hexanes;  $\text{KMnO}_4$ ).  $^1\text{H NMR}$  (400 MHz,  $\text{CDCl}_3$ )  $\delta$  3.94 (t,  $J = 2.8$  Hz, 2H,  $\text{H}_1$ ), 1.52 (t,  $J = 2.8$  Hz, 2H,  $\text{H}_2$ ), 0.10 (s, 9H,  $\text{H}_3$ ).  $^{13}\text{C NMR}$  (100 MHz,  $\text{CDCl}_3$ )  $\delta$  86.9 (C), 74.1 (C), 16.8 ( $\text{CH}_2$ ), 7.6 ( $\text{CH}_2$ ),  $-2.0$  ( $3 \times \text{CH}_3$ ). IR (ATR-FTIR),  $\text{cm}^{-1}$ : 2956 (w), 2223 (w), 1249 (m), 1217 (w), 640 (s), 787 (w), 698 (w), 599 (m).

### Synthesis of the homopropargylic alcohol **31**.

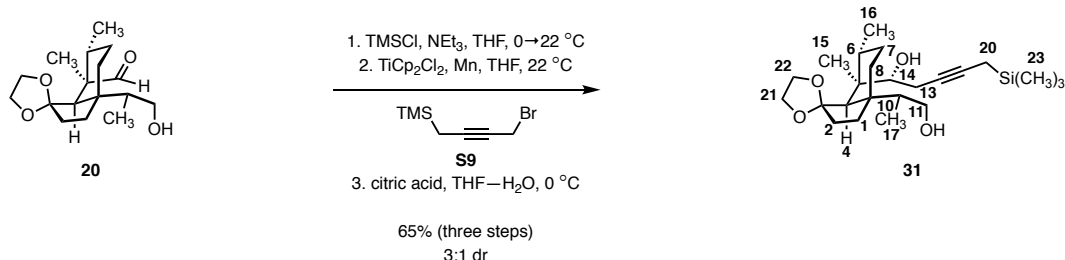

Trimethylsilyl chloride (27.0  $\mu$ L, 209  $\mu$ mol, 1.10 equiv) was added dropwise over 1 min to a solution of triethylamine (53.0  $\mu$ L, 380  $\mu$ mol, 2.00 equiv) and the aldehyde **20** (56.0 mg, 190  $\mu$ mol, 1 equiv) in tetrahydrofuran (1.9 mL) at 0 °C. Upon completion of the addition, the cooling bath was removed and the reaction mixture was allowed to warm to 22 °C over 2 h. The product mixture was cooled to 0 °C over 10 min and the cooled product mixture was diluted sequentially with ether (2.0 mL) and aqueous potassium phosphate buffer solution (pH 7, 2.0 mL). The resulting biphasic mixture was transferred to a separatory funnel and the layers that formed were separated. The aqueous layer was extracted with ether (2  $\times$  2.0 mL). The organic layers were combined and the combined organic layers were washed with saturated aqueous sodium chloride solution (3.0 mL). The washed organic layer was dried over magnesium sulfate. The dried solution was filtered and the filtrate was concentrated. The residue obtained was used directly in the following step.

A mixture of bis(cyclopentadienyl)titanium(IV) dichloride (142 mg, 570  $\mu$ mol, 3.00 equiv) and manganese powder (125 mg, 2.28 mmol, 12.0 equiv) in tetrahydrofuran (2.4 mL) was stirred vigorously at 22 °C until a light green color persisted (approximately 30 min). A solution of (4-bromobut-2-yn-1-yl)trimethylsilane (**S9**, 155 mg, 665  $\mu$ mol, 3.50 equiv) and the protected alcohol obtained in the preceding step (nominally 190  $\mu$ mol, 1 equiv) in tetrahydrofuran (2.4 mL) was then added dropwise over 1 h at 22 °C. The reaction mixture was stirred for 6 h at 22 °C. The product mixture was diluted with hexanes (3.0 mL). The diluted product mixture was eluted over a plug of silica gel (2.0 cm  $\times$  2.0 cm, eluting with 30% ether–hexanes). The filtrates were combined and the combined filtrates were concentrated. The residue obtained was used directly in the following step.

Aqueous citric acid solution (10% w/v, 500  $\mu$ L) was added dropwise to a solution of the addition product obtained in the preceding step (nominally 190  $\mu$ mol, 1 equiv) in tetrahydrofuran (1.5 mL) at 0 °C. The reaction mixture was stirred for 30 min at 0 °C. The product mixture was diluted sequentially with ethyl acetate (1.0 mL) and saturated aqueous sodium bicarbonate solution (1.0 mL). The resulting biphasic mixture was transferred to a separatory funnel and the layers that formed were separated. The aqueous layer was extracted with ethyl acetate (4  $\times$  1.0 mL). The organic layers were combined and the combined organic layers were washed with saturated aqueous sodium chloride solution (1.5 mL). The washed organic layer was dried over magnesium sulfate. The dried solution was filtered and the filtrate was concentrated. The residue obtained was purified by flash-column chromatography (eluting with 15% ethyl acetate–hexanes initially, grading to 30% ethyl acetate–hexanes, four steps) to provide the homopropargylic alcohol **31** as an off-white foam (52.0 mg, 65% over three steps).

$^1\text{H}$  NMR (500 MHz) analysis of the unpurified product mixture indicated the presence of a 3:1 mixture of diastereomers. The relative configuration of the major diastereomer was determined by comparison to the diastereomeric homopropargylic alcohol **21**.

$R_f = 0.48$  (50% ethyl acetate–hexanes; PAA).  $^1\text{H}$  NMR (600 MHz,  $\text{C}_6\text{D}_6$ )  $\delta$  4.32 (d,  $J = 10.6$  Hz, 1H,  $\text{H}_{14}$ ), 3.72 – 3.62 (m, 2H,  $\text{H}_{11a}$ ,  $\text{H}_{21a}$  or  $22a$ ), 3.56 (td,  $J = 6.7, 4.4$  Hz, 1H,  $\text{H}_{21b}$  or  $22b$ ), 3.49 (td,  $J = 7.2, 4.4$  Hz, 1H,  $\text{H}_{21a}$  or  $22a$ ), 3.43 (q,  $J = 6.9$  Hz, 1H,  $\text{H}_{21b}$  or  $22b$ ), 3.17 (td,  $J = 9.8, 4.3$  Hz, 1H,  $\text{H}_{11b}$ ), 2.82 (s, 1H,  $\text{H}_4$ ), 2.55 (dq,  $J = 16.5, 2.6$  Hz, 1H,  $\text{H}_{13a}$ ), 2.42 (ddt,  $J = 16.3, 10.6, 2.8$  Hz, 1H,  $\text{H}_{13b}$ ), 2.23 (dq,  $J = 9.3, 6.5, 2.7$  Hz, 1H,  $\text{H}_{10}$ ), 2.12 (d,  $J = 2.9$  Hz, 1H, OH), 1.95 (dd,  $J = 10.3, 6.1$  Hz, 2H,  $\text{H}_2$ ), 1.71 – 1.51 (m, 4H,  $\text{H}_{1a}$ ,  $\text{H}_6$ ,  $\text{H}_7$ ), 1.47 – 1.38 (m, 1H,  $\text{H}_{1b}$ ), 1.36 (t,  $J = 2.7$  Hz, 2H,  $\text{H}_{20}$ ), 1.21 – 1.06 (m, 11H,  $\text{H}_8$ ,  $\text{H}_{15}$ ,  $\text{H}_{16}$ ,  $\text{H}_{17}$ ), 0.05 (s, 9H,  $\text{H}_{23}$ ).  $^{13}\text{C}$  NMR (150 MHz,  $\text{C}_6\text{D}_6$ )  $\delta$  121.9 (C), 80.4 (C), 77.7 (C), 76.6 (CH), 65.4 ( $\text{CH}_2$ ), 64.3 ( $\text{CH}_2$ ), 63.4 ( $\text{CH}_2$ ), 46.4 (C), 45.9 (CH), 43.2 (CH), 41.4 (C), 36.9 (CH), 36.3 ( $\text{CH}_2$ ), 31.0 ( $\text{CH}_2$ ), 26.1 ( $\text{CH}_2$ ), 26.1 ( $\text{CH}_2$ ), 23.4 ( $\text{CH}_2$ ), 21.0 ( $\text{CH}_3$ ), 17.4 ( $\text{CH}_3$ ), 13.5 ( $\text{CH}_3$ ), 7.2 ( $\text{CH}_2$ ),  $-2.1$  ( $3 \times \text{CH}_3$ ). IR (ATR-FTIR),  $\text{cm}^{-1}$ : 2996 (m), 2359 (w), 2341 (w), 1424 (m), 1401 (m), 1135 (s), 944 (s). HRMS-ESI ( $m/z$ ):  $[\text{M} + \text{Na}]^+$  calcd for  $[\text{C}_{24}\text{H}_{42}\text{NaO}_4\text{Si}]^+$  445.2750; found 445.2738.  $[\alpha]_D^{20} = -4.66$  ( $c = 0.313$ ,  $\text{CHCl}_3$ ).

### Synthesis of the homopropargylic alcohol **32**.

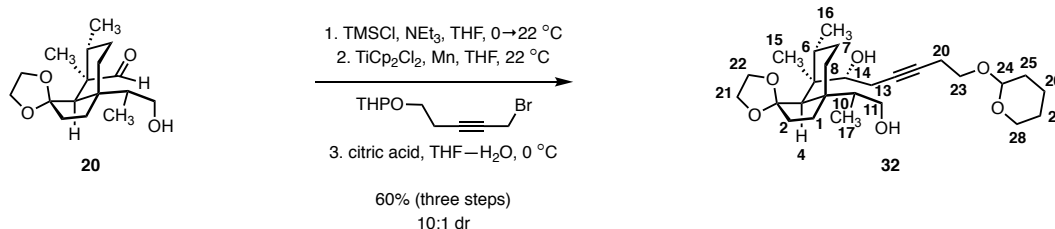

Trimethylsilyl chloride (5.00  $\mu$ L, 36.0  $\mu$ mol, 1.10 equiv) was added dropwise over 1 min to a solution of triethylamine (9.00  $\mu$ L, 65.2  $\mu$ mol, 2.00 equiv) and the aldehyde **20** (9.70 mg, 32.6  $\mu$ mol, 1 equiv) in tetrahydrofuran (320  $\mu$ L) at 0 °C. Upon completion of the addition, the cooling bath was removed and the reaction mixture was allowed to warm to 22 °C over 2 h. The product mixture was cooled to 0 °C over 10 min and the cooled product mixture was diluted sequentially with ether (1.0 mL) and aqueous potassium phosphate buffer solution (pH 7, 1.0 mL). The resulting biphasic mixture was transferred to a separatory funnel and the layers that formed were separated. The aqueous layer was extracted with ether (2  $\times$  2.0 mL). The organic layers were combined and the combined organic layers were washed with saturated aqueous sodium chloride solution (2.0 mL). The washed organic layer was dried over magnesium sulfate. The dried solution was filtered and the filtrate was concentrated. The residue obtained was used directly in the following step.

A mixture of bis(cyclopentylidienyl)titanium(IV) dichloride (24.3 mg, 97.7  $\mu$ mol, 3.00 equiv) and manganese powder (21.5 mg, 391  $\mu$ mol, 12.0 equiv) in tetrahydrofuran (550  $\mu$ L) was stirred vigorously at 22 °C until a light green color persisted (approximately 30 min). A solution of 2-((5-bromopent-3-yn-1-yl)oxy)tetrahydro-2*H*-pyran (32.2 mg, 130  $\mu$ mol, 4.00 equiv) and the protected alcohol obtained in the preceding step (nominally 32.6  $\mu$ mol, 1 equiv) in tetrahydrofuran (550  $\mu$ L) was added dropwise over 45 min at 22 °C. The reaction mixture was stirred for 2 h at 22 °C. The product mixture was diluted with hexanes (2.0 mL). The diluted product mixture was eluted over a plug of silica gel (1.0 cm  $\times$  1.0 cm, eluting with 30% ether–hexanes). The filtrates were combined and the combined filtrates were concentrated. The residue obtained was used directly in the following step.

Aqueous citric acid solution (10% w/v, 100  $\mu$ L) was added dropwise to a solution of the addition product obtained in the preceding step (nominally 32.6  $\mu$ mol, 1 equiv) in tetrahydrofuran (500  $\mu$ L) at 0 °C. The reaction mixture was stirred for 30 min at 0 °C. The product mixture was diluted sequentially with ethyl acetate (1.0 mL) and saturated aqueous sodium bicarbonate solution (1.0 mL). The resulting biphasic mixture was transferred to a separatory funnel and the layers that formed were separated. The aqueous layer was extracted with ethyl acetate (4  $\times$  1.0 mL). The organic layers were combined and the combined organic layers were washed with saturated aqueous sodium chloride solution (1.5 mL). The washed organic layer was dried over magnesium sulfate. The dried solution was filtered and the filtrate was concentrated. The residue obtained was purified by flash-column chromatography (eluting with 15% ethyl acetate–hexanes initially, grading to 30% ethyl acetate–hexanes, four steps) to provide the homopropargylic alcohol **32** as an off-white foam (9.00 mg, 60% over three steps).

<sup>1</sup>H NMR analysis (500 MHz) of the unpurified product mixture indicated the presence of a 10:1 mixture of diastereomers. The relative configuration of the major diastereomer was determined by comparison to the diastereomeric homopropargylic alcohol **21**.

$R_f = 0.39$  (50% ethyl acetate–hexanes; PAA). <sup>1</sup>H NMR (600 MHz, C<sub>6</sub>D<sub>6</sub>)  $\delta$  4.54 (q,  $J = 3.6$  Hz, 1H, H<sub>24</sub>), 4.31 (dd,  $J = 10.4, 2.4$  Hz, 1H, H<sub>14</sub>), 3.79 (tdd,  $J = 13.4, 8.1, 3.4$  Hz, 2H, H<sub>23a</sub>, H<sub>28a</sub>), 3.71 – 3.60 (m, 2H, H<sub>11a</sub>, H<sub>21a</sub> or 22a), 3.54 – 3.44 (m, 2H, H<sub>21b</sub>, H<sub>22b</sub>), 3.43 – 3.31 (m, 3H, H<sub>21a</sub> or 22a, H<sub>23b</sub>, H<sub>28b</sub>), 3.18 (ddd,  $J = 10.7, 8.9, 2.1$  Hz, 1H, H<sub>11b</sub>), 2.77 (d,  $J = 7.5$  Hz, 1H, H<sub>4</sub>), 2.51 (ddq,  $J = 16.4, 4.8, 2.4$  Hz, 1H, H<sub>13a</sub>), 2.37 (ddddt,  $J = 29.4, 23.0, 20.2, 6.9, 2.9$  Hz, 4H, H<sub>13b</sub>, H<sub>20</sub>, OH), 2.23 (tdt,  $J = 11.4, 6.6, 3.0$  Hz, 1H, H<sub>10</sub>), 1.91 (dd,  $J = 9.3, 6.3$ , 2H, H<sub>2</sub>), 1.80 – 1.49 (m, 7H, H<sub>1a</sub>, H<sub>6</sub>, H<sub>7</sub>, H<sub>25</sub>, H<sub>26a</sub>), 1.45 – 1.22 (m, 4H, H<sub>1b</sub>, H<sub>26b</sub>, H<sub>27</sub>), 1.22 – 1.00 (m, 11H, H<sub>8</sub>, H<sub>15</sub>, H<sub>16</sub>, H<sub>17</sub>). <sup>13</sup>C NMR (150 MHz, C<sub>6</sub>D<sub>6</sub>)  $\delta$  121.8 (C), 98.8 (d,  $J = 14.7$  Hz, CH), 80.3 (C), 76.3 (C), 76.1 (CH), 66.2 (CH<sub>2</sub>), 65.3 (CH<sub>2</sub>), 64.2 (CH<sub>2</sub>), 63.3 (CH<sub>2</sub>), 61.9 (CH<sub>2</sub>), 46.4 (C), 46.1 (CH), 43.0 (CH), 41.6 (C), 37.1 (CH), 36.2 (CH<sub>2</sub>), 30.9 (CH<sub>2</sub>), 30.9 (CH<sub>2</sub>), 26.2 (CH<sub>2</sub>), 25.8 (CH<sub>2</sub>), 23.3 (CH<sub>2</sub>), 20.8 (CH<sub>2</sub>), 20.7 (CH<sub>2</sub>), 20.7 (CH<sub>3</sub>), 19.6 (CH<sub>2</sub>), 17.5 (CH<sub>3</sub>), 13.5 (CH<sub>3</sub>). IR (ATR-FTIR), cm<sup>-1</sup>: 2928 (w), 2357 (m), 2019 (w), 1219 (w), 773 (s). HRMS-ESI (m/z): [M+H]<sup>+</sup> calcd for [C<sub>27</sub>H<sub>45</sub>O<sub>6</sub>]<sup>+</sup> 465.3216; found 465.3211.  $[\alpha]_D^{20} = -17.4$  ( $c = 0.055$ , CHCl<sub>3</sub>).

### Synthesis of the homopropargylic alcohol **33**.

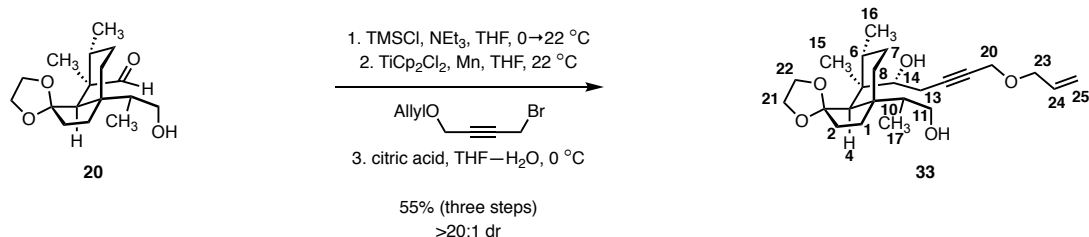

Trimethylsilyl chloride (14.0  $\mu$ L, 108  $\mu$ mol, 1.10 equiv) was added dropwise over 1 min to a solution of triethylamine (27.0  $\mu$ L, 195  $\mu$ mol, 2.00 equiv) and the aldehyde **20** (29.0 mg, 97.7  $\mu$ mol, 1 equiv) in tetrahydrofuran (970  $\mu$ L) at 0 °C. Upon completion of the addition, the cooling bath was removed and the reaction mixture was allowed to warm to 22 °C over 2 h. The product mixture was cooled to 0 °C over 10 min and the cooled product mixture was diluted sequentially with ether (2.0 mL) and aqueous potassium phosphate buffer solution (pH 7, 1.0 mL). The resulting biphasic mixture was transferred to a separatory funnel and the layers that formed were separated. The aqueous layer was extracted with ether (2  $\times$  2.0 mL). The organic layers were combined and the combined organic layers were washed with saturated aqueous sodium chloride solution (2.0 mL). The washed organic layer was dried over magnesium sulfate. The dried solution was filtered and the filtrate was concentrated. The residue obtained was used directly in the following step.

A mixture of bis(cyclopentadienyl)titanium(IV) dichloride (72.9 mg, 293  $\mu$ mol, 3.00 equiv) and manganese powder (64.4 mg, 1.17 mmol, 12.0 equiv) in tetrahydrofuran (1.0 mL) was stirred vigorously at 22 °C until a light green color persisted (approximately 30 min). A solution of 1-(allyloxy)-4-bromobut-2-yne (73.9 mg, 391  $\mu$ mol, 4.00 equiv) and the protected alcohol obtained in the preceding step (nominally 97.7  $\mu$ mol, 1 equiv) in tetrahydrofuran (1.0 mL) was added dropwise over 15 min at 22 °C. The reaction mixture was stirred for 1 h at 22 °C. The product mixture was diluted with hexanes (3.0 mL). The diluted product mixture was eluted over a plug of silica gel (2.0 cm  $\times$  2.0 cm, eluting with 30% ether–hexanes). The filtrates were combined and the combined filtrates were concentrated. The residue obtained was used directly in the following step.

Aqueous citric acid solution (10% w/v, 300  $\mu$ L) was added dropwise to a solution of the addition product obtained in the preceding step (nominally 97.7  $\mu$ mol, 1 equiv) in tetrahydrofuran (1.5 mL) at 0 °C. The reaction mixture was stirred for 30 min at 0 °C. The product mixture was diluted sequentially with ethyl acetate (1.0 mL) and saturated aqueous sodium bicarbonate solution (1.0 mL). The resulting biphasic mixture was transferred to a separatory funnel and the layers that formed were separated. The aqueous layer was extracted with ethyl acetate (4  $\times$  1.0 mL). The organic layers were combined and the combined organic layers were washed with saturated aqueous sodium chloride solution (1.5 mL). The washed organic layer was dried over magnesium sulfate. The dried solution was filtered and the filtrate was concentrated. The residue obtained was purified by flash-column chromatography (eluting with 15% ethyl acetate–hexanes initially, grading to 30% ethyl acetate–hexanes, four steps) to provide the homopropargylic alcohol **33** as an off-white foam (22.0 mg, 55% over three steps).

Within the limits of detection (500 MHz  $^1\text{H}$  NMR analysis), the homopropargylic alcohol **33** was formed as a single diastereomer. The relative stereochemistry was determined by comparison to the diastereomeric addition product **21**.

$R_f = 0.40$  (50% ethyl acetate–hexanes; PAA).  $^1\text{H}$  NMR (600 MHz,  $\text{C}_6\text{D}_6$ )  $\delta$  5.81 (ddt,  $J = 17.3, 10.7, 5.4$  Hz, 1H,  $\text{H}_{24}$ ), 5.24 (dq,  $J = 17.2, 1.8$  Hz, 1H,  $\text{H}_{25a}$ ), 5.02 (dq,  $J = 10.4, 1.5$  Hz, 1H,  $\text{H}_{25b}$ ), 4.28 (dd,  $J = 10.4, 2.4$  Hz, 1H,  $\text{H}_{14}$ ), 3.98 (t,  $J = 2.1$  Hz, 2H,  $\text{H}_{20}$ ), 3.91 (dt,  $J = 5.4, 1.6$  Hz, 2H,  $\text{H}_{23}$ ), 3.64 (dt,  $J = 10.4, 2.6$  Hz, 1H,  $\text{H}_{11a}$ ), 3.56 (tdd,  $J = 9.0, 6.8, 1.6$  Hz, 1H,  $\text{H}_{21a}$  or  $22a$ ), 3.45 – 3.39 (m, 2H,  $\text{H}_{21b}, \text{H}_{22b}$ ), 3.38 – 3.32 (m, 1H,  $\text{H}_{21a}$  or  $22a$ ), 3.16 (ddd,  $J = 10.7, 8.8, 2.0$  Hz, 1H,  $\text{H}_{11b}$ ), 2.71 (s, 1H,  $\text{H}_4$ ), 2.52 (dq,  $J = 16.6, 2.2$  Hz, 1H,  $\text{H}_{13a}$ ), 2.36 (ddt,  $J = 16.7, 10.4, 2.1$  Hz, 1H,  $\text{H}_{13b}$ ), 2.20 (dq,  $J = 9.4, 6.5, 2.9$  Hz, 1H,  $\text{H}_{10}$ ), 1.94 – 1.82 (m, 2H,  $\text{H}_2$ ), 1.60 (ddd,  $J = 14.2, 8.9, 5.5$  Hz, 2H,  $\text{H}_{1a}, \text{H}_6$ ), 1.57 – 1.49 (m, 2H,  $\text{H}_7$ ), 1.45 – 1.35 (m, 1H,  $\text{H}_{1b}$ ), 1.17 – 0.98 (m, 11H,  $\text{H}_8, \text{H}_{15}, \text{H}_{16}, \text{H}_{17}$ ).  $^{13}\text{C}$  NMR (150 MHz,  $\text{C}_6\text{D}_6$ )  $\delta$  134.5 (CH), 121.3 (C), 116.5 ( $\text{CH}_2$ ), 85.5 (C), 78.4 (C), 76.1 (CH), 70.2 ( $\text{CH}_2$ ), 64.7 ( $\text{CH}_2$ ), 63.7 ( $\text{CH}_2$ ), 62.8 ( $\text{CH}_2$ ), 57.5 ( $\text{CH}_2$ ), 46.0 (C), 45.6 (CH), 42.6 (CH), 41.3 (C), 36.6 (CH), 35.7 ( $\text{CH}_2$ ), 30.5 ( $\text{CH}_2$ ), 25.7 ( $\text{CH}_2$ ), 25.7 ( $\text{CH}_2$ ), 23.0 ( $\text{CH}_2$ ), 20.4 ( $\text{CH}_3$ ), 17.0 ( $\text{CH}_3$ ), 13.0 ( $\text{CH}_3$ ). IR (ATR-FTIR),  $\text{cm}^{-1}$ : 3461 (w), 2940 (m), 2883 (m), 2361 (m), 1454 (w), 1073 (m), 1021 (m), 773 (s). HRMS-ESI ( $m/z$ ):  $[\text{M} + \text{H}]^+$  calcd for  $[\text{C}_{24}\text{H}_{39}\text{O}_5]^+$  407.2797; found 407.2792.  $[\alpha]_D^{20} = -15.1$  ( $c = 0.160$ ,  $\text{CHCl}_3$ ).



Synthesis of 1-bromo-6-chlorohex-2-yne (**S11**).

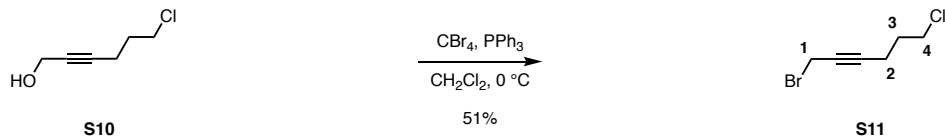

Triphenylphosphine (10.9 g, 41.8 mmol, 1.10 equiv) was added in three portions over 30 min to a solution of tetrabromomethane (13.8 g, 41.8 mmol, 1.10 equiv) and 6-chlorohex-2-yn-1-ol (**S10**, 5.04 g, 38.0 mmol, 1 equiv) in dichloromethane (190 mL) at 0 °C. The reaction mixture was stirred for 2 h at 0 °C. The product mixture was diluted with pentane (500 mL) and the diluted product mixture was filtered through a pad of Celite. The Celite pad was rinsed with pentane (100 mL). The filtrates were combined and the combined filtrates were concentrated. The residue obtained was purified by flash-column chromatography (eluting with 100% pentane) to provide 1-bromo-6-chlorohex-2-yne (**S11**) as a colorless oil (3.80 g, 51%).

$R_f = 0.75$  (1% ether–hexanes;  $\text{KMnO}_4$ ).  $^1\text{H NMR}$  (500 MHz,  $\text{CDCl}_3$ )  $\delta$  3.91 (t,  $J = 2.4$  Hz, 2H,  $\text{H}_1$ ), 3.63 (t,  $J = 6.3$  Hz, 2H,  $\text{H}_4$ ), 2.44 (tt,  $J = 6.8, 2.4$  Hz, 2H,  $\text{H}_2$ ), 1.96 (p,  $J = 6.6$  Hz, 2H,  $\text{H}_3$ ).  $^{13}\text{C NMR}$  (100 MHz,  $\text{CDCl}_3$ )  $\delta$  86.0 (C), 76.3 (C), 43.5 ( $\text{CH}_2$ ), 31.0 ( $\text{CH}_2$ ), 16.4 ( $\text{CH}_2$ ), 15.2 ( $\text{CH}_2$ ). IR (ATR-FTIR),  $\text{cm}^{-1}$ : 2958 (w), 2362 (w), 2234 (w), 1429 (w), 1239 (w), 1206 (m), 859 (w), 723 (w), 652 (m), 608 (s).

### Synthesis of the homopropargylic alcohol **34**.

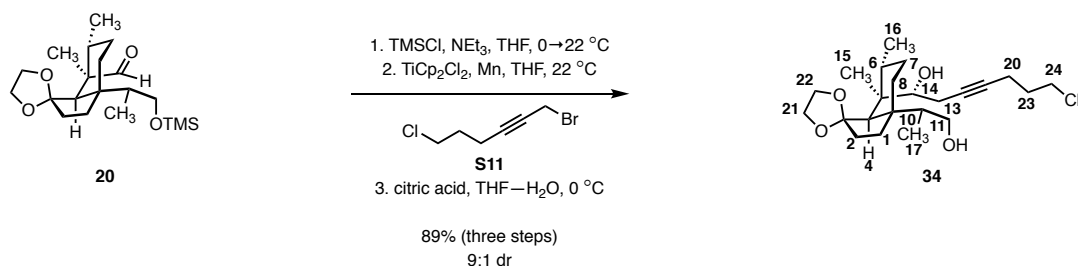

Trimethylsilyl chloride (264  $\mu$ L, 2.08 mmol, 1.10 equiv) was added dropwise over 1 min to a solution of triethylamine (526  $\mu$ L, 3.78 mmol, 2.00 equiv) and the aldehyde **20** (560 mg, 1.89 mmol, 1 equiv) in tetrahydrofuran (19 mL) at 0 °C. Upon completion of the addition, the cooling bath was removed and the reaction mixture was allowed to warm to 22 °C over 2 h. The product mixture was cooled to 0 °C over 10 min and the cooled product mixture was diluted sequentially with ether (30 mL) and aqueous potassium phosphate buffer solution (pH 7, 25 mL). The resulting biphasic mixture was transferred to a separatory funnel and the layers that formed were separated. The aqueous layer was extracted with ether (2  $\times$  10 mL). The organic layers were combined and the combined organic layers were washed with saturated aqueous sodium chloride solution (10 mL). The washed organic layer was dried over magnesium sulfate. The dried solution was filtered and the filtrate was concentrated. The residue obtained was used directly in the following step.

A mixture of bis(cyclopentadienyl)titanium(IV) dichloride (1.41 g, 5.70 mmol, 3.00 equiv) and manganese powder (1.25 g, 22.8 mmol, 12.0 equiv) in tetrahydrofuran (24 mL) was stirred vigorously at 22 °C until a light green color persisted (approximately 30 min). A solution of the propargyl bromide **S11** (1.49 g, 7.59 mmol, 4.00 equiv) and the protected alcohol obtained in the preceding step (nominally 1.89 mmol, 1 equiv) in tetrahydrofuran (24 mL) was added dropwise over 70 min at 22 °C using a syringe pump. The reaction mixture was stirred for 2.5 h at 22 °C. The product mixture was diluted with hexanes (40 mL). The diluted product mixture was eluted over a plug of silica gel (4.0 cm  $\times$  4.0 cm, eluting with 30% ether–hexanes). The filtrates were combined and the combined filtrates were concentrated. The residue obtained was used directly in the following step.

Aqueous citric acid solution (10% w/v, 15 mL) was added dropwise to a solution of the addition product obtained in the preceding step (nominally 1.89 mmol, 1 equiv) in tetrahydrofuran (60 mL) at 0 °C. The reaction mixture was stirred for 30 min at 0 °C. The product mixture was diluted sequentially with ethyl acetate (100 mL) and saturated aqueous sodium bicarbonate solution (100 mL). The resulting biphasic mixture was transferred to a separatory funnel and the layers that formed were separated. The aqueous layer was extracted with ethyl acetate (4  $\times$  150 mL). The organic layers were combined and the combined organic layers were washed with saturated aqueous sodium chloride solution (200 mL). The washed organic layer was dried over magnesium sulfate. The dried solution was filtered and the filtrate was concentrated. The residue obtained was purified by flash-column chromatography (eluting with 15% ethyl acetate–hexanes initially, grading to 30% ethyl acetate–hexanes, four steps) to provide the homopropargylic alcohol **34** as an off-white foam (700 mg, 89% over three steps).

$^1\text{H}$  NMR (500 MHz) analysis of the unpurified product mixture indicated the presence of a 9:1 mixture of diastereomers. The relative configuration of the major diastereomer was determined by comparison to the diastereomeric homopropargylic alcohol **21**.

$R_f = 0.41$  (50% ethyl acetate–hexanes; PAA).  $^1\text{H}$  NMR (600 MHz,  $\text{C}_6\text{D}_6$ )  $\delta$  4.27 (d,  $J = 10.2$  Hz, 1H,  $\text{H}_{14}$ ), 3.66 (d,  $J = 10.6$  Hz, 1H,  $\text{H}_{11a}$ ), 3.64 – 3.58 (m, 1H,  $\text{H}_{21a}$  or  $22a$ ), 3.47 (tq,  $J = 15.3, 9.6, 7.7$  Hz, 2H,  $\text{H}_{21b}, \text{H}_{22b}$ ), 3.38 (q,  $J = 10.0, 8.4$  Hz, 1H,  $\text{H}_{21a}$  or  $22a$ ), 3.25 (t,  $J = 6.5$  Hz, 2H,  $\text{H}_{24}$ ), 3.18 (t,  $J = 9.6$  Hz, 1H,  $\text{H}_{11b}$ ), 2.77 (s, 1H,  $\text{H}_4$ ), 2.49 (d,  $J = 16.3$ , 1H,  $\text{H}_{13a}$ ), 2.35 (dd,  $J = 16.2, 10.8$  Hz, 1H,  $\text{H}_{13b}$ ), 2.21 (t,  $J = 7.6$  Hz, 1H,  $\text{H}_{10}$ ), 2.06 (q,  $J = 7.8$  Hz, 2H,  $\text{H}_{20}$ ), 1.91 (q,  $J = 7.1, 5.8$  Hz, 2H,  $\text{H}_2$ ), 1.69 – 1.49 (m, 6H,  $\text{H}_{1a}, \text{H}_6, \text{H}_7, \text{H}_{23}$ ), 1.42 (dt,  $J = 20.3, 9.7$  Hz, 1H,  $\text{H}_{1b}$ ), 1.15 (dd,  $J = 12.2, 4.9$  Hz, 11H,  $\text{H}_8, \text{H}_{15}, \text{H}_{16}, \text{H}_{17}$ ).  $^{13}\text{C}$  NMR (150 MHz,  $\text{C}_6\text{D}_6$ )  $\delta$  121.8 (C), 80.7 (C), 80.3 (C), 76.5 (CH), 65.3 ( $\text{CH}_2$ ), 64.2 ( $\text{CH}_2$ ), 63.3 ( $\text{CH}_2$ ), 46.4 (C), 45.9 (CH), 43.7 ( $\text{CH}_2$ ), 43.1 (CH), 41.6 (C), 37.0 (CH), 36.2 ( $\text{CH}_2$ ), 31.8 ( $\text{CH}_2$ ), 31.0 ( $\text{CH}_2$ ), 26.1 ( $\text{CH}_2$ ), 26.1 ( $\text{CH}_2$ ), 23.2 ( $\text{CH}_2$ ), 20.9 ( $\text{CH}_3$ ), 17.3 ( $\text{CH}_3$ ), 16.4 ( $\text{CH}_2$ ), 13.5 ( $\text{CH}_3$ ). IR (AT-FTIR),  $\text{cm}^{-1}$ : 3410 (w), 2945 (m), 2884 (w), 1020 (m). HRMS-ESI ( $m/z$ ):  $[\text{M} + \text{H}]^+$  calcd for  $[\text{C}_{23}\text{H}_{38}\text{ClO}_4]^+$  413.2459; found 413.2461.  $[\alpha]_D^{20} = -94.7$  ( $c = 0.350$ ,  $\text{CHCl}_3$ ).

### Synthesis of the sulfide **S12**.

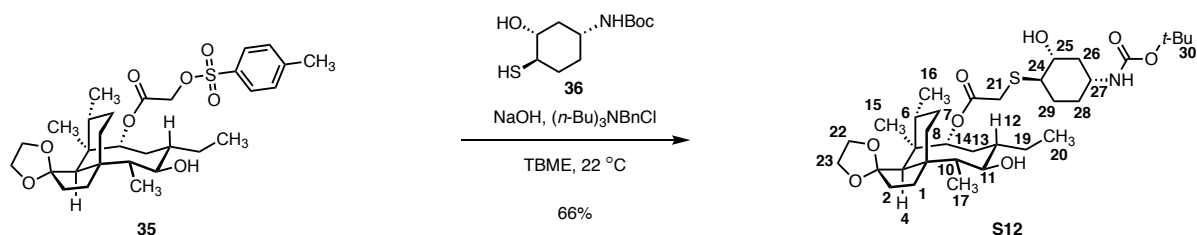

Aqueous sodium hydroxide solution (1 N, 11.8  $\mu\text{L}$ , 11.8  $\mu\text{mol}$ , 1.66 equiv) was added to a solution of the thiol **36** (5.80 mg, 11.7  $\mu\text{mol}$ , 1.66 equiv), benzyl tri-*n*-butylammonium chloride (440  $\mu\text{g}$ , 1.40  $\mu\text{mol}$ , 0.20 equiv) and the sulfonate **35** (4.00 mg, 7.10  $\mu\text{mol}$ , 1 equiv) in *tert*-butyl methyl ether (320  $\mu\text{L}$ ) at 22 °C. The reaction mixture was stirred for 2 h at 22 °C. The product mixture was diluted sequentially with dichloromethane (1.0 mL) and 1 N aqueous sodium hydroxide solution (1.0 mL). The resulting biphasic mixture was transferred to a separatory funnel and the layers that formed were separated. The aqueous layer was extracted with dichloromethane (2  $\times$  1.0 mL). The organic layers were combined and the combined organic layers were washed sequentially with aqueous sodium thiosulfate solution (10% w/v, 1.0 mL), aqueous phosphoric acid solution (0.1 N, 1.0 mL), saturated aqueous sodium bicarbonate solution (1.0 mL), and saturated aqueous sodium chloride solution (1.0 mL). The washed organic layer was dried over magnesium sulfate. The dried solution was filtered and the filtrate was concentrated. The residue obtained was purified by flash-column chromatography (eluting with 30% ethyl acetate–hexanes initially, grading to 80% ethyl acetate–hexanes, three steps) to provide the displacement product **S12** as a white foam (3.00 mg, 66%).

$R_f = 0.21$  (80% ethyl acetate–hexanes; PAA). <sup>1</sup>H NMR (600 MHz, CDCl<sub>3</sub>)  $\delta$  5.33 (d,  $J = 8.2$  Hz, 1H, H<sub>14</sub>), 4.44 (s, 1H, NH), 4.03 (q,  $J = 6.3, 5.4$  Hz, 1H, H<sub>22a</sub> or H<sub>23a</sub>), 3.89 (tt,  $J = 13.7, 7.0$  Hz, 2H, H<sub>22b</sub>, H<sub>23b</sub>), 3.75 (q,  $J = 7.3, 6.4$  Hz, 1H, H<sub>22a</sub> or H<sub>23a</sub>), 3.51 (s, 2H, H<sub>27</sub>, OH), 3.40 – 3.28 (m, 3H, H<sub>11</sub>, H<sub>21a</sub>, H<sub>25</sub>), 3.26 – 3.19 (m, 1H, H<sub>21b</sub>), 2.44 (ddd,  $J = 13.6, 9.9, 3.9$  Hz, 1H, H<sub>24</sub>), 2.34 (d,  $J = 12.2$  Hz, 1H, H<sub>26a</sub>), 2.24 (dt,  $J = 10.9, 5.8$  Hz, 1H, H<sub>6</sub>), 2.15 (q,  $J = 6.9$  Hz, 1H, H<sub>10</sub>), 2.08 – 2.00 (m, 2H, H<sub>28a</sub>, H<sub>29a</sub>), 1.98 (s, 1H, H<sub>4</sub>), 1.93 – 1.69 (m, 5H, H<sub>2</sub>, H<sub>12</sub>, H<sub>13a</sub>, H<sub>19a</sub>), 1.62 – 1.50 (m, 2H, H<sub>8</sub>), 1.49 – 1.09 (m, 18H, H<sub>1</sub>, H<sub>7</sub>, H<sub>13b</sub>, H<sub>19b</sub>, H<sub>26b</sub>, H<sub>28b</sub>, H<sub>29b</sub>, H<sub>30</sub>), 1.07 (s, 3H, H<sub>15</sub>), 0.92 – 0.84 (m, 6H, H<sub>17</sub>, H<sub>20</sub>), 0.69 (d,  $J = 7.3$  Hz, 3H, H<sub>16</sub>). <sup>13</sup>C NMR (150 MHz, CDCl<sub>3</sub>)  $\delta$  171.0 (C), 155.0 (C), 120.4 (C), 79.4 (C), 75.9 (CH), 71.7 (CH), 71.4 (CH), 63.8 (CH<sub>2</sub>), 61.5 (CH<sub>2</sub>), 52.9 (CH), 51.0 (CH), 48.0 (CH), 47.7 (CH), 46.2 (C), 41.6 (C), 40.5 (CH<sub>2</sub>), 40.0 (CH), 36.6 (CH<sub>2</sub>), 35.8 (CH<sub>2</sub>), 35.4 (CH), 33.2 (CH<sub>2</sub>), 33.1 (CH<sub>2</sub>), 29.4 (CH<sub>2</sub>), 29.3 (CH<sub>2</sub>), 28.7 (CH<sub>2</sub>), 28.4 (3  $\times$  CH<sub>3</sub>), 27.2 (CH<sub>2</sub>), 25.8 (CH<sub>2</sub>), 17.7 (CH<sub>3</sub>), 14.7 (CH<sub>3</sub>), 11.5 (CH<sub>3</sub>), 10.6 (CH<sub>3</sub>). IR (AT-FTIR), cm<sup>-1</sup>: 2933 (w), 2358 (s), 2342 (m), 1696 (w). HRMS-ESI (m/z): [M + Na]<sup>+</sup> calcd for [C<sub>34</sub>H<sub>57</sub>NNaO<sub>8</sub>S]<sup>+</sup> 662.3703; found 662.3686.  $[\alpha]_D^{20} = -11.1$  ( $c = 0.063$ , CHCl<sub>3</sub>).

Synthesis of the lefamulin derivative **37**.

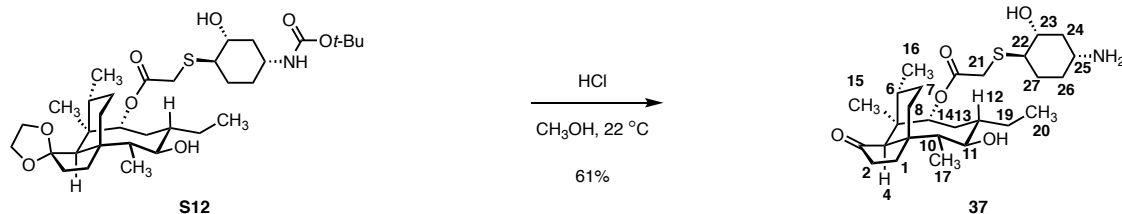

Concentrated aqueous hydrochloric acid solution (12 N, 1.30  $\mu\text{L}$ , 16.0  $\mu\text{mol}$ , 10.0 equiv) was added to a solution of the thioglycolic ester **S12** (1.00 mg, 1.60  $\mu\text{mol}$ , 1 equiv) in methanol (200  $\mu\text{L}$ ) at 22  $^\circ\text{C}$ . The reaction mixture was stirred for 72 h at 22  $^\circ\text{C}$ . The product mixture was concentrated to provide the lefamulin derivative **37** as a white solid (510  $\mu\text{g}$ , 61%). The product obtained in this way was judged to be of >95% purity (600 MHz  $^1\text{H}$  NMR analysis) and was used in susceptibility testing without further purification.

$R_f$  = 0.05 (95% ethyl acetate–hexanes; PAA).  $^1\text{H}$  NMR (600 MHz,  $\text{CD}_3\text{OD}$ )  $\delta$  5.39 (d,  $J$  = 8.2 Hz, 1H, H<sub>14</sub>), 3.59 – 3.46 (m, 2H, H<sub>21a</sub>, H<sub>23</sub>), 3.37 (ddd,  $J$  = 25.5, 10.9, 7.0 Hz, 1H, H<sub>11</sub>), 3.33 – 3.29 (m, 1H, H<sub>21b</sub>), 3.24 – 3.14 (m, 1H, H<sub>25</sub>), 2.69 (td,  $J$  = 10.1, 4.1 Hz, 1H, H<sub>22</sub>), 2.31 – 2.09 (m, 7H, H<sub>1a</sub>, H<sub>2</sub>, H<sub>4</sub>, H<sub>10</sub>, H<sub>24a</sub>, H<sub>27a</sub>), 2.04 – 2.00 (m, 1H, H<sub>26a</sub>), 1.89 – 1.77 (m, 3H, H<sub>8a</sub>, H<sub>13a</sub>, H<sub>19a</sub>), 1.76 – 1.58 (m, 3H, H<sub>6</sub>, H<sub>7a</sub>, H<sub>12</sub>), 1.51 – 1.40 (m, 8H, H<sub>1b</sub>, H<sub>7b</sub>, H<sub>13b</sub>, H<sub>15</sub>, H<sub>24b</sub>, H<sub>26b</sub>), 1.40 – 1.26 (m, 2H, H<sub>19b</sub>, H<sub>27b</sub>), 1.21 – 1.07 (m, 1H, H<sub>8b</sub>), 0.97 (d,  $J$  = 7.0 Hz, 3H, H<sub>17</sub>), 0.88 (t,  $J$  = 7.4 Hz, 3H, H<sub>20</sub>), 0.78 (d,  $J$  = 7.1 Hz, 3H, H<sub>16</sub>).  $^{13}\text{C}$  NMR (150 MHz,  $\text{CD}_3\text{OD}$ )  $\delta$  218.2 (C), 170.9 (C), 73.9 (CH), 71.6 (CH), 70.8 (CH), 57.7 (CH), 49.8 (CH), 47.8 (CH), 47.4 (CH; detected by HSQC), 45.4 (C), 41.3 (C), 41.2 (CH), 37.9 (CH<sub>2</sub>), 36.7 (CH), 35.9 (CH<sub>2</sub>), 33.8 (CH<sub>2</sub>), 33.3 (CH<sub>2</sub>), 30.4 (CH<sub>2</sub>), 29.2 (CH<sub>2</sub>), 27.6 (CH<sub>2</sub>), 26.9 (CH<sub>2</sub>), 25.3 (CH<sub>2</sub>), 24.8 (CH<sub>2</sub>), 16.7 (CH<sub>3</sub>), 14.2 (CH<sub>3</sub>), 10.3 (CH<sub>3</sub>), 9.5 (CH<sub>3</sub>). IR (AT-FTIR),  $\text{cm}^{-1}$ : 3734 (w), 2359 (s), 2431 (m), 1717 (w), 668 (w). HRMS-ESI ( $m/z$ ):  $[\text{M} + \text{H}]^+$  calcd for  $[\text{C}_{27}\text{H}_{46}\text{NO}_5\text{S}]^+$  496.3097; found 496.3090.  $[\alpha]_D^{20} = +25.7$  ( $c = 0.035$ ,  $\text{CH}_3\text{OH}$ ).

### Synthesis of the $\beta$ -keto ester **38**.

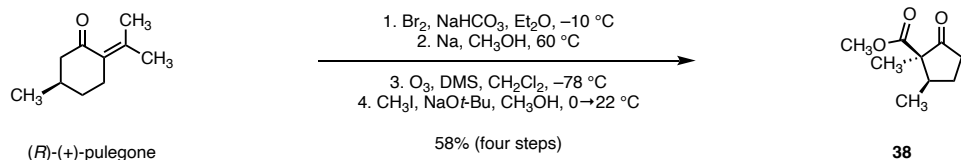

Bromine (19.5 mL, 380 mmol, 1.10 equiv) was added dropwise over 20 min via addition funnel to a suspension of sodium bicarbonate (8.72 g, 104 mmol, 0.30 equiv) and (*R*)-(+)-pulegone (57.2 g, 346 mmol, 1 equiv) in ether (430 mL) at -10 °C. The reaction mixture was stirred for 3 h at -10 °C. The stirred reaction mixture was transferred via cannula to a solution of sodium metal (19.5 g, 847 mmol, 2.45 equiv) in methanol (350 mL) at 22 °C. The reaction vessel was placed in a heating mantle that had been preheated to 60 °C. The reaction mixture for stirred and heated for 2 h at 60 °C. The product mixture was cooled to 20 °C over 20 min. The cooled product mixture was diluted sequentially with ether (500 mL) and saturated aqueous ammonium chloride solution (500 mL). The resulting biphasic mixture was transferred to a separatory funnel and the layers that formed were separated. The aqueous layer was extracted with ether (4 × 400 mL). The organic layers were combined and the combined organic layers were washed with saturated aqueous sodium chloride solution (800 mL). The washed organic layer was dried over magnesium sulfate. The dried solution was filtered and the filtrate was concentrated. The residue obtained was used directly in the following step.

Ozone was passed through a solution of the unpurified olefin obtained in the previous step (nominally 346 mmol, 1 equiv) in dichloromethane (230 mL) at -78 °C. The addition of ozone was continued until a blue color persisted (~4 h). Nitrogen was then passed through the solution to remove any dissolved ozone, resulting in a colorless solution. Dimethyl sulfide (30.7 mL, 415 mmol, 1.20 equiv) was then added to the cold mixture. Upon completion of the addition, the cooling bath was removed and the product mixture was allowed to warm to 22 °C over 16 h. The warmed product mixture was concentrated. The residue obtained was purified by fractional distillation at 100 Torr (collecting the fraction boiling between 100–120 °C) to obtain the intermediate  $\beta$ -keto ester as a yellow oil (36.5 g, 234 mmol).

Sodium *tert*-butoxide (33.8 g, 352 mmol, 1.50 equiv) was added in four portions over 1 h to a solution of methyl iodide (29.2 mL, 469 mmol, 2.00 equiv) and the unpurified  $\beta$ -keto ester obtained in the preceding step (36.5 g, 234 mmol) in methanol (270 mL) at 0 °C. Upon completion of the addition, the cooling bath was removed, and the reaction mixture was allowed to warm to 22 °C over 30 min. The warmed reaction mixture was stirred for 16 h at 22 °C. The product mixture was diluted sequentially with ether (600 mL) and saturated aqueous ammonium chloride solution (500 mL). The resulting biphasic mixture was transferred to a separatory funnel and the layers that formed were separated. The aqueous layer was extracted with ether (3 × 400 mL). The organic layers were combined and the combined organic layers were washed with saturated aqueous sodium chloride solution (800 mL). The washed organic layer was dried over magnesium sulfate. The dried solution was filtered and the filtrate was concentrated. The residue obtained was purified by fractional distillation at 100 Torr (collecting the fraction boiling between 120–140 °C) to provide the  $\beta$ -keto ester **38** as a yellow oil (34.2 g, 58% over four steps).

<sup>1</sup>H NMR analysis (400 MHz) of the unpurified product mixture indicated the presence of a >20:1 mixture of diastereomers. Spectroscopic data for the β-keto ester **38** obtained in this way were identical to those previously reported.<sup>15</sup>

$R_f = 0.65$  (55% ethyl acetate–hexanes; PAA). <sup>1</sup>H NMR (500 MHz, CDCl<sub>3</sub>) δ 3.67 (s, 3H), 2.58 (ddd,  $J = 19.3, 8.9, 1.4$  Hz, 1H), 2.26 (ddd,  $J = 19.4, 11.1, 8.7$  Hz, 1H), 2.09 – 1.97 (m, 2H), 1.88 – 1.73 (m, 1H), 1.26 (s, 3H), 1.05 (d,  $J = 6.5$  Hz, 3H).

Synthesis of the enone **39**.

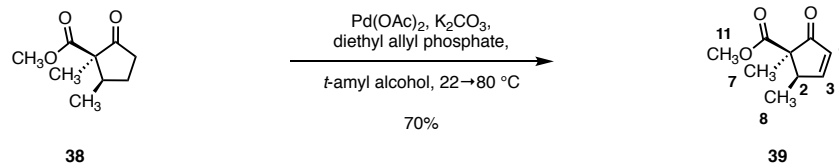

Palladium acetate (10% w/w, 1.50 g) was added to a mixture of diethyl allyl phosphate (29.2 g, 150 mmol, 1.80 equiv), potassium carbonate (15.0 g, 108 mmol, 1.30 equiv) and the  $\beta$ -keto ester **38** (14.1 g, 83.1 mmol, 1 equiv) in *tert*-amyl alcohol (110 mL) at 22  $^\circ\text{C}$ . The reaction vessel was placed in an oil bath that had been preheated to 80  $^\circ\text{C}$ . The reaction mixture was stirred for 16 h at 80  $^\circ\text{C}$ . The product mixture was cooled to 22  $^\circ\text{C}$  over 10 min. The cooled product mixture was diluted with acetone (50 mL). The diluted product mixture was filtered through a pad of Celite. The Celite pad was rinsed with acetone (50 mL). The filtrates were combined and the combined filtrates were concentrated. The residue obtained was purified by flash-column chromatography (eluting with 10% ethyl acetate–hexanes initially, grading to 20% ethyl acetate–hexanes, three steps) to provide the enone **39** as a dark yellow oil (9.78 g, 70%).

$R_f = 0.35$  (20% ethyl acetate–hexanes; UV).  $^1\text{H}$  NMR (400 MHz,  $\text{CDCl}_3$ )  $\delta$  7.51 (dd,  $J = 5.7, 2.4$  Hz, 1H, H<sub>3</sub>), 6.19 (dd,  $J = 5.7, 2.1$  Hz, 1H, H<sub>4</sub>), 3.66 (s, 3H, H<sub>11</sub>), 2.82 (qt,  $J = 7.5, 2.3$  Hz, 1H, H<sub>2</sub>), 1.40 (s, 3H, H<sub>7</sub>), 1.15 (d,  $J = 7.5$  Hz, 3H, H<sub>8</sub>).  $^{13}\text{C}$  NMR (150 MHz,  $\text{CDCl}_3$ )  $\delta$  207.5 (C), 171.9 (C), 166.7 (CH), 131.9 (CH), 58.0 (C), 52.0 (CH<sub>3</sub>), 48.5 (CH), 20.2 (CH<sub>3</sub>), 14.8 (CH<sub>3</sub>). IR (ATR-FTIR),  $\text{cm}^{-1}$ : 2970 (w), 2359 (s), 2342 (m), 1737 (s), 1711 (s), 1456 (w), 1375 (w), 1216 (w). HRMS-ESI ( $m/z$ ):  $[\text{M} + \text{H}]^+$  calcd for  $[\text{C}_9\text{H}_{13}\text{O}_3]^+$  169.0865; found 169.0859.  $[\alpha]_D^{20} = -407.3$  ( $c = 0.21$ ,  $\text{CHCl}_3$ ).



Synthesis of the enone **41**.

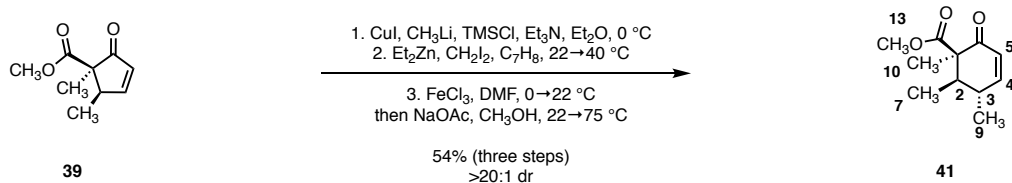

A solution of methyl lithium in ether (1.60 M, 26.6 mL, 42.6 mmol, 3.00 equiv) was added to a solution of copper (I) iodide (4.06 g, 21.3 mmol, 1.50 equiv) in ether (31 mL) at 0 °C. The mixture was stirred for 10 min at 0 °C. A solution of the enone **39** (2.39 g, 14.2 mmol, 1.00 equiv) in ether (31 mL) was then added dropwise. The reaction mixture was stirred for 10 min at 0 °C. Trimethylsilyl chloride (14.4 mL, 114 mmol, 8.00 equiv) and triethylamine (15.8 mL, 114 mmol, 8.00 equiv) were then added sequentially to the stirred mixture. The reaction mixture was stirred for 10 min at 0 °C. The product mixture was diluted sequentially with hexanes (25 mL), ether (25 mL), and aqueous potassium phosphate buffer solution (pH 7, 60 mL). The resulting biphasic mixture was transferred to a separatory funnel and the layers that formed were separated. The organic layer was washed sequentially with water (2 × 60 mL) and saturated aqueous sodium chloride solution (60 mL). The washed organic layer was dried over magnesium sulfate. The dried solution was filtered and the filtrate was concentrated. The residue obtained was used directly in the following step.

A solution of diethylzinc in toluene (15% w/w, 38.8 mL, 42.7 mmol, 3.00 equiv) and diiodomethane (3.40 mL, 42.7 mmol, 3.00 equiv) were added in sequence to a solution of the unpurified enoxysilane obtained in the preceding step (nominally 14.2 mmol, 1 equiv) in toluene (40 mL) at 22 °C. Upon completion of the addition, the reaction vessel was transferred to an oil bath that had been preheated to 40 °C. The reaction mixture was stirred for 2 d at 40 °C. The product mixture was cooled to 22 °C over 10 min. The cooled product mixture was diluted with saturated aqueous ammonium chloride solution (50 mL). The resulting biphasic mixture was transferred to a separatory funnel and the layers that formed were separated. The aqueous layer was extracted with ether (3 × 80 mL). The organic layers were combined and the combined organic layers were washed with saturated aqueous sodium chloride solution (100 mL). The washed organic layer was dried over sodium sulfate. The dried solution was filtered and the filtrate was concentrated. The residue obtained was used directly in the following step.

A solution of the unpurified cyclopropanol obtained in the preceding step (nominally 14.2 mmol, 1 equiv) in *N,N*-dimethylformamide (10 mL) was added dropwise over 20 min to a solution of iron (III) chloride (4.62 g, 28.5 mmol, 2.20 equiv) in *N,N*-dimethylformamide (13 mL) at 0 °C. The reaction mixture was stirred for 2 h at 22 °C. A saturated solution of sodium acetate in methanol (80 mL) was then added. The reaction vessel was transferred to an oil bath that had been preheated to 75 °C. The warmed reaction mixture was stirred for 3 h at 75 °C. The product mixture was diluted sequentially with ether (100 mL) and aqueous hydrochloric acid solution (1 N, 50 mL). The resulting biphasic mixture was transferred to a separatory funnel and the layers that formed were separated. The aqueous layer was extracted with ether (3 × 200 mL). The organic layers were combined and the combined organic layers were washed with saturated aqueous sodium chloride solution (200 mL). The washed organic layer was dried over sodium sulfate. The dried

solution was filtered and the filtrate was concentrated. The residue obtained was purified by flash-column chromatography (eluting with 10% ethyl acetate–hexanes, grading up to 20% ethyl acetate–hexanes, three steps) to provide the enone **41** as a yellow oil (1.50 g, 54% over three steps).

<sup>1</sup>H NMR analysis (400 MHz) of the unpurified product mixture indicated the presence of a >20:1 mixture of diastereomers. The relative stereochemistry of **41** was established by X-ray analysis of the methylation product **S20** (see page S165).

$R_f = 0.33$  (10% ethyl acetate–hexanes; UV, PAA). <sup>1</sup>H NMR (400 MHz, CDCl<sub>3</sub>)  $\delta$  6.73 (dd,  $J = 10.2, 2.1$  Hz, 1H, H<sub>5</sub>), 6.02 (dd,  $J = 10.2, 2.7$  Hz, 1H, H<sub>4</sub>), 3.63 (s, 3H, H<sub>13</sub>), 2.54 – 2.47 (m, 1H, H<sub>3</sub>), 1.64 (dd,  $J = 6.3, 3.6$  Hz, 1H, H<sub>2</sub>), 1.42 (s, 3H, H<sub>10</sub>), 1.14 (t,  $J = 7.5$  Hz, 6H, H<sub>7</sub>, H<sub>9</sub>). <sup>13</sup>C NMR (100 MHz, CDCl<sub>3</sub>)  $\delta$  197.1 (C), 171.5 (C), 156.1 (CH), 127.4 (CH), 57.1 (C), 52.2 (CH<sub>3</sub>), 45.8 (CH), 35.7 (CH), 19.4 (CH<sub>3</sub>), 19.2 (CH<sub>3</sub>), 14.0 (CH<sub>3</sub>). IR (ATR-FTIR), cm<sup>-1</sup>: 2983 (w), 2881 (w), 2359 (m), 2341 (w), 1736 (s), 1675 (s), 1454 (w), 1376 (w), 1218 (m), 1165 (w), 1111 (w), 1088 (w), 773 (w). HRMS-ESI (m/z): [M + H]<sup>+</sup> calcd for [C<sub>11</sub>H<sub>17</sub>O<sub>3</sub>]<sup>+</sup> 197.1178; found 197.1172.  $[\alpha]_D^{20} = +77.4$  ( $c = 0.395$ , CHCl<sub>3</sub>).

Synthesis of the cyclohexanone **42**.

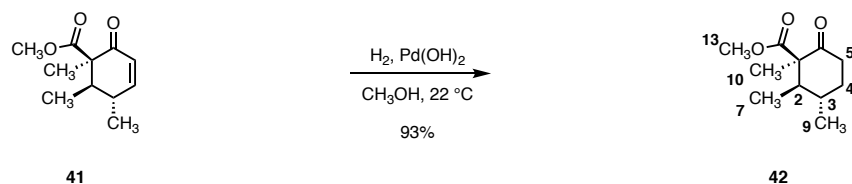

Palladium hydroxide (10% w/w, 120 mg) was added to a solution of the enone **41** (1.20 g, 6.12 mmol, 1 equiv) in methanol (50 mL) at 22 °C. The reaction vessel was sparged with a balloon of dihydrogen. The reaction mixture was stirred for 12 h at 22 °C. The product mixture was filtered through a pad of Celite. The Celite pad was rinsed with dichloromethane (100 mL). The filtrates were combined and the combined filtrates were concentrated to provide the cyclohexanone **42** as a pale yellow oil (1.12 g, 93%). The product obtained in this way was judged to be of >95% purity (400 MHz <sup>1</sup>H NMR analysis) and was used without further purification.

$R_f = 0.36$  (10% ethyl acetate–hexanes; PAA). <sup>1</sup>H NMR (400 MHz, CDCl<sub>3</sub>) δ 3.67 (s, 3H, H<sub>13</sub>), 2.80 (td,  $J = 14.1, 6.2$  Hz, 1H, H<sub>5a</sub>), 2.43 (ddd,  $J = 14.1, 4.5, 2.6$  Hz, 1H, H<sub>5b</sub>), 2.10 – 1.92 (m, 2H, H<sub>2</sub>, H<sub>4a</sub>), 1.44 – 1.35 (m, 1H, H<sub>4b</sub>), 1.34 (s, 3H, H<sub>10</sub>), 1.30 – 1.20 (m, 1H, H<sub>3</sub>), 1.10 (d,  $J = 6.8$  Hz, 3H, H<sub>9</sub>), 0.96 (d,  $J = 6.4$  Hz, 3H, H<sub>7</sub>). <sup>13</sup>C NMR (150 MHz, CDCl<sub>3</sub>) δ 208.5 (C), 172.0 (C), 60.5 (C), 52.1 (CH<sub>3</sub>), 49.6 (CH), 40.0 (CH<sub>2</sub>), 34.8 (CH<sub>2</sub>), 33.6 (CH), 20.0 (CH<sub>3</sub>), 19.4 (CH<sub>3</sub>), 14.6 (CH<sub>3</sub>). IR (ATR-FTIR), cm<sup>-1</sup>: 2922 (w), 2852 (w), 2360 (s), 2341 (m), 1720 (w), 1461 (w), 1221 (w), 773 (w). HRMS-ESI ( $m/z$ ): [M + H]<sup>+</sup> calcd for [C<sub>11</sub>H<sub>19</sub>O<sub>3</sub>]<sup>+</sup> 199.1334; found 199.1329.  $[\alpha]_D^{20} = -41.2$  ( $c = 0.195$ , CHCl<sub>3</sub>).

Synthesis of the alcohol **S13**.

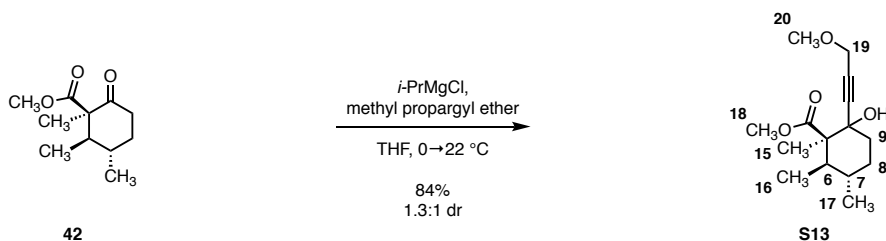

A solution of *iso*-propyl magnesium chloride in tetrahydrofuran (2.0 M, 3.50 mL, 7.02 mmol, 1.30 equiv) was added dropwise to a solution of methyl propargyl ether (592  $\mu\text{L}$ , 7.02 mmol, 1.30 equiv) in tetrahydrofuran (7.2 mL) at 0  $^{\circ}\text{C}$ . The reaction mixture was stirred for 20 min at 0  $^{\circ}\text{C}$ . The resulting mixture was added dropwise to a solution of the cyclohexanone **42** (1.01 g, 5.40 mmol, 1 equiv) in tetrahydrofuran (11 mL) at 0  $^{\circ}\text{C}$ . Upon completion of the addition, the cooling bath was removed and the reaction mixture was allowed to warm to 22  $^{\circ}\text{C}$  over 20 min. The warmed reaction mixture was stirred for 1 h at 22  $^{\circ}\text{C}$ . The product mixture was diluted sequentially with ethyl acetate (20 mL) and saturated aqueous ammonium chloride solution (20 mL). The resulting biphasic mixture was transferred to a separatory funnel and the layers that formed were separated. The aqueous layer was extracted with ethyl acetate (3  $\times$  30 mL). The organic layers were combined and the combined organic layers were washed with saturated aqueous sodium chloride solution (60 mL). The washed organic layer was dried over magnesium sulfate. The dried solution was filtered and the filtrate was concentrated to provide the alkylation product **S13** as a yellow oil (1.21 g, 84%).

$^1\text{H}$  NMR analysis (400 MHz) of the unpurified product mixture indicated the presence of a 1.3:1 mixture of diastereomers (stereochemistry not assigned). The unpurified product was employed in the following step.

Synthesis of the enone **43**.

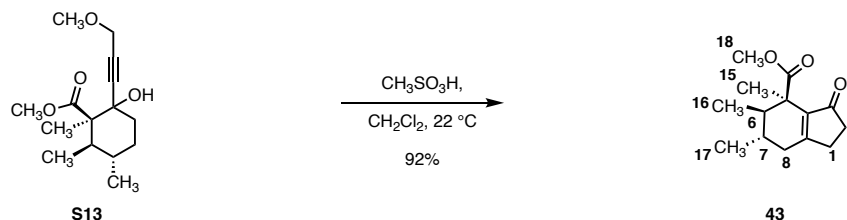

A solution of the alcohol **S13** (650 mg, 2.42 mmol, 1 equiv) in dichloromethane (2.4 mL) was added dropwise to a solution of methanesulfonic acid (3.10 mL, 48.4 mmol, 20.0 equiv) at 22 °C. The reaction mixture was stirred at 22 °C for 1 h. The product mixture was carefully poured into water (40 mL) that had been cooled to <5 °C. Ether (30 mL) was added and the resulting biphasic mixture was transferred to a separatory funnel. The layers that formed were separated. The aqueous layer was extracted with ether (3 × 30 mL). The organic layers were combined and the combined organic layers were washed with saturated aqueous sodium chloride solution (50 mL). The washed organic layer was dried over magnesium sulfate. The dried solution was filtered and the filtrate was concentrated. The residue obtained was purified by flash-column chromatography (eluting with 10% ethyl acetate–hexanes initially, grading to 40% ethyl acetate–hexanes, four steps) to provide the enone **43** as a yellow oil (530 mg, 92%).

$R_f = 0.22$  (20% ethyl acetate–hexanes; PAA).  $^1\text{H NMR}$  (400 MHz,  $\text{CDCl}_3$ )  $\delta$  3.62 (s, 3H,  $\text{H}_{18}$ ), 2.52 (q,  $J = 3.0$  Hz, 2H,  $\text{H}_2$ ), 2.42 (d,  $J = 4.5$ , 1H,  $\text{H}_{8a}$ ), 2.40 – 2.33 (m, 2H,  $\text{H}_1$ ), 2.03 (dd,  $J = 18.6$ , 11.0, 1H,  $\text{H}_{8b}$ ), 1.86 (tdd,  $J = 11.1$ , 6.7, 4.6 Hz, 1H,  $\text{H}_7$ ), 1.43 (s, 3H,  $\text{H}_{15}$ ), 1.24 (dq,  $J = 10.8$ , 6.9 Hz, 1H,  $\text{H}_6$ ), 0.98 (d,  $J = 6.6$  Hz, 3H,  $\text{H}_{17}$ ), 0.93 (d,  $J = 6.9$  Hz, 3H,  $\text{H}_{16}$ ).  $^{13}\text{C NMR}$  (150 MHz,  $\text{CDCl}_3$ )  $\delta$  207.3 (C), 174.2 (C), 173.5 (C), 141.2 (C), 51.9 ( $\text{CH}_3$ ), 46.3 (C), 46.0 (CH), 37.9 ( $\text{CH}_2$ ), 34.8 ( $\text{CH}_2$ ), 31.0 (CH), 29.8 ( $\text{CH}_2$ ), 21.4 ( $\text{CH}_3$ ), 19.7 ( $\text{CH}_3$ ), 13.1 ( $\text{CH}_3$ ). IR (ATR-FTIR),  $\text{cm}^{-1}$ : 2918 (w), 2851 (w), 2363 (s), 2342 (m), 1699 (w), 1652 (w). HRMS-ESI ( $m/z$ ):  $[\text{M} + \text{H}]^+$  calcd for  $[\text{C}_{14}\text{H}_{21}\text{O}_3]^+$  237.1491; found 237.1485.  $[\alpha]_D^{20} = +186.6$  ( $c = 0.035$ ,  $\text{CHCl}_3$ ).

Synthesis of the carboxylic acid **S14**.

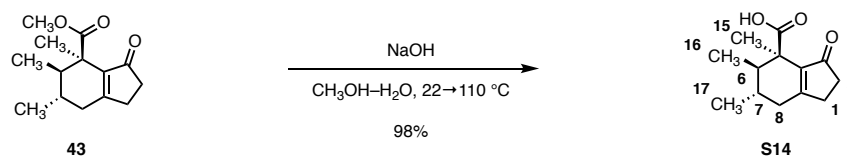

Aqueous sodium hydroxide solution (2 N, 320 mL, 640 mmol, 20.0 equiv) was added to a solution of the methyl ester **43** (7.50 g, 31.7 mmol, 1 equiv) in methanol (320 mL) at 22 °C. The reaction vessel was equipped with a reflux condenser and then placed in an oil bath that had been preheated to 110 °C. The reaction mixture was stirred for 48 h at 110 °C. The product mixture was cooled to 22 °C over 10 min. The cooled product mixture was diluted sequentially with water (300 mL) and ether (300 mL). The resulting biphasic mixture was transferred to a separatory funnel and the layers that formed were separated. The aqueous layer was washed with ether (2 × 300 mL, discarded). The washed aqueous layer was cooled to 0 °C over 10 min. The pH of the cooled aqueous layer was adjusted to 1 by the dropwise addition of 12 N concentrated hydrochloric acid solution over 20 min at 0 °C. The acidified aqueous phase was diluted with ether (300 mL) and the resulting biphasic mixture was transferred to a separatory funnel. The layers that formed were separated. The aqueous layer was extracted with ether (2 × 300 mL). The organic layers were combined and the combined organic layers were dried over sodium sulfate. The dried solution was filtered and the filtrate was concentrated to obtain the carboxylic acid **S14** as a yellow foam (6.88 g, 98%). The product so obtained was judged to be of >95% purity (400 MHz <sup>1</sup>H NMR analysis) and was used without further purification.

$R_f = 0.04$  (40% ethyl acetate–hexanes; PAA). <sup>1</sup>H NMR (400 MHz, CDCl<sub>3</sub>) δ 2.52 (q,  $J = 4.9$  Hz, 2H, H<sub>2</sub>), 2.44 – 2.32 (m, 3H, H<sub>8a</sub>, H<sub>1</sub>), 2.09 – 1.98 (m, 1H, H<sub>8b</sub>), 1.99 – 1.85 (m, 1H, H<sub>7</sub>), 1.46 (s, 3H, H<sub>15</sub>), 1.32 – 1.21 (m, 1H, H<sub>6</sub>), 1.04 (d,  $J = 7.0$  Hz, 3H, H<sub>16</sub>), 1.00 (d,  $J = 6.5$  Hz, 3H, H<sub>17</sub>). <sup>13</sup>C NMR (150 MHz, CDCl<sub>3</sub>) δ 207.7 (C), 178.1 (C), 174.6 (C), 140.6 (C), 46.1 (C), 45.9 (CH), 38.0 (CH<sub>2</sub>), 34.9 (CH<sub>2</sub>), 30.7 (CH), 29.8 (CH<sub>2</sub>), 21.1 (CH<sub>3</sub>), 19.7 (CH<sub>3</sub>), 12.9 (CH<sub>3</sub>). IR (ATR-FTIR), cm<sup>-1</sup>: 2361 (s), 2341 (m), 771 (w). HRMS-ESI (m/z): [M + H]<sup>+</sup> calcd for [C<sub>13</sub>H<sub>19</sub>O<sub>3</sub>]<sup>+</sup> 223.1334; found 223.1329.  $[\alpha]_D^{20} = +356.8$  ( $c = 0.025$ , CHCl<sub>3</sub>).

Synthesis of the diazoketone **S15**.

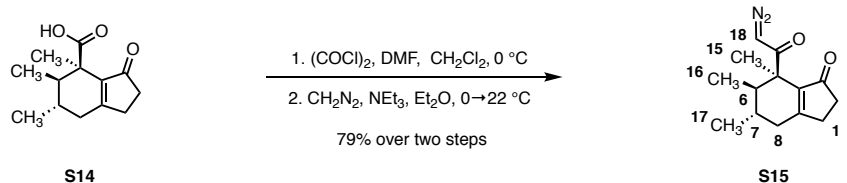

Oxalyl chloride (190  $\mu\text{L}$ , 2.23 mmol, 1.10 equiv) was added dropwise over 5 min to a solution of the carboxylic acid **S14** [450 mg, 2.02 mmol, 1 equiv; dried by azeotropic distillation with benzene (3  $\times$  5.0 mL)] and *N,N*-dimethylformamide (312  $\mu\text{L}$ , 4.05 mmol, 2.00 equiv) in dichloromethane (3.4 mL) at 0  $^\circ\text{C}$ . The reaction mixture was stirred for 2 h at 0  $^\circ\text{C}$ . The product mixture was concentrated. The residue obtained was dissolved in dichloromethane (20 mL) and the resulting solution was eluted over a plug of silica gel (4.0 cm  $\times$  3.0 cm). The silica gel plug was washed with 50% ether–hexanes (100 mL). The filtrates were combined and the combined filtrates were concentrated. The residue obtained was used directly in the following step.

A solution of the unpurified acid chloride obtained in the preceding step (nominally 2.02 mmol, 1 equiv) in ether (14 mL) was added dropwise over 20 min to a solution of diazomethane in ether (ca. 0.66 M, 14.0 mL, 7.00 equiv) and triethylamine (850  $\mu\text{L}$ , 6.07 mmol, 3.00 equiv) at 0  $^\circ\text{C}$ . The reaction mixture was stirred for 1 h at 0  $^\circ\text{C}$ . The cooling bath was removed, and the reaction mixture was allowed to warm to 22  $^\circ\text{C}$  over 1 h. The reaction mixture was stirred for 12 h at 22  $^\circ\text{C}$ . The product mixture was cooled to 0  $^\circ\text{C}$  over 20 min. The cooled product mixture was slowly diluted with aqueous potassium phosphate buffer solution (pH 7, 20 mL). The resulting biphasic mixture was stirred for 2 h at 0  $^\circ\text{C}$ . The stirred biphasic mixture was transferred to a separatory funnel and the layers that formed were separated. The aqueous layer was extracted with ether (3  $\times$  20 mL). The organic layers were combined and the combined organic layers were washed sequentially with water (30 mL) and saturated aqueous sodium chloride solution (30 mL). The washed organic layer was dried over magnesium sulfate. The dried solution was filtered, and the filtrate was concentrated. The residue obtained was purified by flash-column chromatography (eluting with 20% ethyl acetate–hexanes initially, grading to 60% ethyl acetate–hexanes, four steps) to provide the diazoketone **S15** as a yellow solid (395 mg, 79% over two steps).

$R_f$  = 0.39 (50% ethyl acetate–hexanes; PAA).  $^1\text{H}$  NMR (400 MHz,  $\text{CDCl}_3$ )  $\delta$  5.41 (s, 1H, H<sub>18</sub>), 2.56 – 2.50 (m, 2H, H<sub>2</sub>), 2.50 – 2.39 (m, 1H, H<sub>8a</sub>), 2.39 – 2.33 (m, 2H, H<sub>1</sub>), 2.10 – 1.95 (m, 2H, H<sub>8b</sub>, H<sub>7</sub>), 1.44 (s, 3H, H<sub>15</sub>), 1.20 (dq,  $J$  = 9.8, 7.3 Hz, 1H, H<sub>6</sub>), 0.98 (d,  $J$  = 6.1 Hz, 6H, H<sub>16</sub>, H<sub>17</sub>).  $^{13}\text{C}$  NMR (150 MHz,  $\text{CDCl}_3$ )  $\delta$  207.4 (C), 196.4 (C), 175.1 (C), 141.4 (C), 55.2 (CH), 49.7 (C), 46.7 (CH), 38.1 (CH<sub>2</sub>), 35.0 (CH<sub>2</sub>), 30.9 (CH), 29.8 (CH<sub>2</sub>), 20.8 (CH<sub>3</sub>), 19.8 (CH<sub>3</sub>), 12.8 (CH<sub>3</sub>). IR (ATR-FTIR),  $\text{cm}^{-1}$ : 3087 (w), 2973 (w), 2929 (w), 2380 (w), 2341 (w), 2099 (s), 1695 (s), 1648 (m), 1625 (m), 1454 (w), 1344 (m), 1304 (w), 1152 (w), 1121 (w), 1026 (w), 979 (w), 775 (w). HRMS-ESI ( $m/z$ ):  $[\text{M} + \text{Na}]^+$  calcd for  $[\text{C}_{14}\text{H}_{18}\text{N}_2\text{O}_2\text{Na}]^+$  269.1266; found 269.1261.  $[\alpha]_D^{20}$  = +336.9 ( $c$  = 0.235,  $\text{CHCl}_3$ ).



Synthesis of the Arndt–Eistert homologation products **S16** and **S17**.

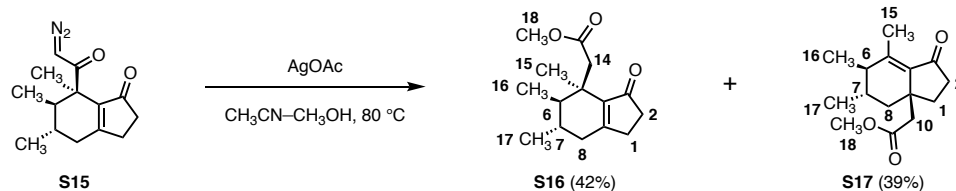

A solution of the diazoketone **S15** (2.15 g, 8.29 mmol, 1 equiv) in acetonitrile (100 mL) was added rapidly over 1 min via additional funnel to a suspension of silver acetate (415 mg, 2.49 mmol, 0.30 equiv) in methanol (64 mL) and acetonitrile (450 mL) that had been preheated to 80 °C. The reaction mixture was stirred for 1 h at 80 °C. The product mixture was cooled to 22 °C over 10 min. The cooled product mixture was filtered through a pad of Celite. The Celite pad was rinsed with ethyl acetate (2 × 100 mL). The filtrates were combined, and the combined filtrates were concentrated. The residue obtained was purified by flash-column chromatography (eluting with 10% ethyl acetate–hexanes initially, grading to 40% ether–hexanes, four steps) to provide separately the homologation product **S16** (pale yellow oil, 870 mg, 42%) and the rearranged ester **S17** (pale yellow oil, 799 mg, 39%).

The relative stereochemistry of **S17** was determined by X-ray analysis of the methylation product **S20** (see page S165).

**S16**:  $R_f$  = 0.39 (20% ethyl acetate–hexanes; UV).  $^1\text{H NMR}$  (400 MHz,  $\text{CDCl}_3$ )  $\delta$  3.55 (s, 3H,  $\text{H}_{18}$ ), 2.65 (d,  $J$  = 12.9 Hz, 1H,  $\text{H}_{14a}$ ), 2.48 – 2.40 (m, 2H,  $\text{H}_{1a}$ ,  $\text{H}_{2a}$ ), 2.40 – 2.29 (m, 3H,  $\text{H}_{8a}$ ,  $\text{H}_{1b}$ ,  $\text{H}_{2b}$ ), 2.27 (d,  $J$  = 12.9 Hz, 1H,  $\text{H}_{14b}$ ), 2.01 – 1.89 (m, 1H,  $\text{H}_{8b}$ ), 1.58 – 1.44 (m, 1H,  $\text{H}_7$ ), 1.35 (s, 3H,  $\text{H}_{15}$ ), 1.21 (dq,  $J$  = 11.2, 6.8 Hz, 1H,  $\text{H}_6$ ), 1.00 (d,  $J$  = 6.9 Hz, 3H,  $\text{H}_{16}$ ), 0.96 (d,  $J$  = 6.5 Hz, 3H,  $\text{H}_{17}$ ).  $^{13}\text{C NMR}$  (150 MHz,  $\text{CDCl}_3$ )  $\delta$  208.3 (C), 173.1 (C), 172.9 (C), 142.2 (C), 51.5 ( $\text{CH}_3$ ), 47.0 (CH), 39.1 ( $\text{CH}_2$ ), 38.4 ( $\text{CH}_2$ ), 38.3 (C), 35.3 ( $\text{CH}_2$ ), 30.4 (CH), 29.4 ( $\text{CH}_2$ ), 24.5 ( $\text{CH}_3$ ), 20.1 ( $\text{CH}_3$ ), 11.8 ( $\text{CH}_3$ ). IR (ATR-FTIR),  $\text{cm}^{-1}$ : 2975 (w), 2362 (w), 2325 (w), 1733 (m), 1696 (s), 1645 (s), 1438 (w), 1383 (w), 1263 (w), 1211 (w), 1143 (w), 1119 (w), 1017 (w). HRMS-ESI ( $m/z$ ):  $[\text{M} + \text{H}]^+$  calcd for  $[\text{C}_{15}\text{H}_{23}\text{O}_3]^+$  251.1647; found 251.1642.  $[\alpha]_D^{20} = +152.5$  ( $c = 0.445$ ,  $\text{CHCl}_3$ ).

**S17**:  $R_f$  = 0.58 (20% ethyl acetate–hexanes; UV).  $^1\text{H NMR}$  (600 MHz,  $\text{CDCl}_3$ )  $\delta$  3.67 (s, 3H,  $\text{H}_{18}$ ), 2.46 – 2.21 (m, 5H,  $\text{H}_1$ ,  $\text{H}_2$ ,  $\text{H}_{10a}$ ), 2.07 (s, 3H,  $\text{H}_{15}$ ), 2.07 – 2.02 (m, 1H,  $\text{H}_{8a}$ ), 1.77 – 1.70 (m, 1H,  $\text{H}_6$ ), 1.66 – 1.58 (m, 1H,  $\text{H}_7$ ), 1.47 (dd,  $J$  = 9.0, 1.7 Hz, 1H,  $\text{H}_{10b}$ ), 1.16, (d,  $J$  = 7.0 Hz, 3H,  $\text{H}_{16}$ ), 1.04 (d,  $J$  = 6.6 Hz, 4H,  $\text{H}_{17}$ ,  $\text{H}_{8b}$ ).  $^{13}\text{C NMR}$  (150 MHz,  $\text{CDCl}_3$ )  $\delta$  207.8 (C), 172.0 (C), 152.2 (C), 137.1 (C), 51.6 ( $\text{CH}_3$ ), 45.7 (CH), 43.1 (C), 42.1 ( $\text{CH}_2$ ), 40.7 ( $\text{CH}_2$ ), 36.0 ( $\text{CH}_2$ ), 33.1 (CH), 32.2 ( $\text{CH}_2$ ), 21.1 ( $\text{CH}_3$ ), 17.9 ( $\text{CH}_3$ ), 17.5 ( $\text{CH}_3$ ). IR (ATR-FTIR),  $\text{cm}^{-1}$ : 2955 (w), 1734 (s), 1707 (s), 1629 (m), 1435 (w), 1215 (w), 1172 (w), 1084 (w), 1008 (w). HRMS-ESI ( $m/z$ ):  $[\text{M} + \text{H}]^+$  calcd for  $[\text{C}_{15}\text{H}_{23}\text{O}_3]^+$  251.1647; found 251.1642.  $[\alpha]_D^{20} = -273.6$  ( $c = 0.385$ ,  $\text{CHCl}_3$ ).



### Synthesis of the hydrocyanation product **S18**.

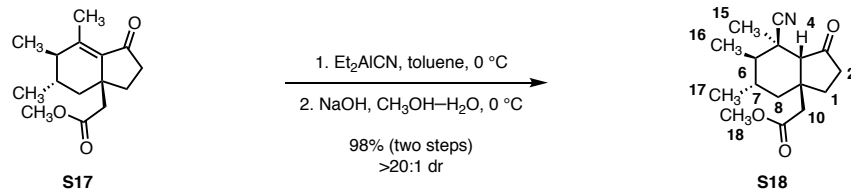

**CAUTION:** Cyanide hazard! Perform reaction, aqueous workup, and purification in a well-ventilated fume hood. All glassware and waste solutions should be washed with bleach prior to removing from fume hood.

A solution of diethylaluminum cyanide solution in toluene (1.0 M, 2.90 mL, 2.86 mmol, 1.10 equiv) was added dropwise over 2 min to a solution of the enone **S17** (650 mg, 2.60 mmol, 1 equiv) in toluene (17 mL) at  $0\text{ }^\circ\text{C}$ . The reaction mixture was stirred for 20 min at  $0\text{ }^\circ\text{C}$ . The product mixture was diluted with saturated aqueous potassium sodium tartrate solution (20 mL). The resulting biphasic mixture was stirred vigorously for 2 h at  $22\text{ }^\circ\text{C}$ . The stirred biphasic mixture was transferred to a separatory funnel and the layers that formed were separated. The aqueous layer was extracted with ether ( $3 \times 40\text{ mL}$ ). The organic layers were combined and the combined organic layers were washed with saturated aqueous sodium chloride solution (60 mL). The washed organic layer was dried over magnesium sulfate. The dried solution was filtered and the filtrate was concentrated. The residue obtained was used directly in the following step.

Aqueous sodium hydroxide solution (0.1 N, 3.2 mL) was added dropwise over 1 min to a solution of the unpurified product obtained in the preceding step (nominally 2.60 mmol, 1 equiv) in methanol (16 mL) at  $0\text{ }^\circ\text{C}$ . The reaction mixture was stirred for 1 h at  $0\text{ }^\circ\text{C}$ . The product mixture was diluted sequentially with ether (20 mL) and saturated aqueous ammonium chloride solution (20 mL). The resulting biphasic mixture was transferred to a separatory funnel and the layers that formed were separated. The aqueous layer was extracted with ether ( $3 \times 30\text{ mL}$ ). The organic layers were combined and the combined organic layers were washed with saturated aqueous sodium chloride solution (60 mL). The washed organic layer was dried over magnesium sulfate. The dried solution was filtered and the filtrate was concentrated. The residue obtained was purified by flash-column chromatography (eluting with 20% ethyl acetate–hexanes) to provide the hydrocyanation product **S18** as a pale yellow oil (702 mg, 98% over two steps).

$^1\text{H}$  NMR analysis (500 MHz) of the unpurified product mixture indicated a >20:1 mixture of diastereomers. The relative stereochemistry of **S18** was established by X-ray analysis of the methylation product **S20** (see page S165).

$R_f = 0.30$  (20% ethyl acetate–hexanes; CAM).  $^1\text{H}$  NMR (500 MHz,  $\text{CDCl}_3$ )  $\delta$  3.70 (s, 3H,  $\text{H}_{18}$ ), 3.04 – 2.96 (m, 2H,  $\text{H}_4$ ,  $\text{H}_{10a}$ ), 2.81 (d,  $J = 16.5\text{ Hz}$ , 1H,  $\text{H}_{10b}$ ), 2.37 – 2.13 (m, 2H,  $\text{H}_2$ ), 2.04 (dt,  $J = 12.9, 10.2\text{ Hz}$ , 1H,  $\text{H}_{1a}$ ), 1.77 (s, 3H,  $\text{H}_{15}$ ), 1.74 – 1.63 (m, 2H,  $\text{H}_7$ ,  $\text{H}_{1b}$ ), 1.60 (dt,  $J = 14.4, 3.0\text{ Hz}$ , 1H,  $\text{H}_{8a}$ ), 1.27 – 1.16 (m, 1H,  $\text{H}_6$ ), 1.09 (d,  $J = 6.6\text{ Hz}$ , 3H,  $\text{H}_{16}$ ), 0.98 (dd,  $J = 14.3, 12.4\text{ Hz}$ , 1H,  $\text{H}_{8b}$ ), 0.93 (d,  $J = 6.3\text{ Hz}$ , 3H,  $\text{H}_{17}$ ).  $^{13}\text{C}$  NMR (150 MHz,  $\text{CDCl}_3$ )  $\delta$  214.6 (C), 172.2 (C), 123.1 (C), 57.7 (CH), 51.6 ( $\text{CH}_3$ ), 42.5 (CH), 41.8 (C), 41.5 ( $\text{CH}_2$ ), 40.9 ( $\text{CH}_2$ ), 39.1 (C), 34.1 ( $\text{CH}_2$ ), 31.9 (CH), 30.6 ( $\text{CH}_2$ ), 23.5 ( $\text{CH}_3$ ), 20.1 ( $\text{CH}_3$ ), 13.4 ( $\text{CH}_3$ ). IR (ATR-FTIR),  $\text{cm}^{-1}$ : 2953 (w), 1735

(s), 1454 (w), 1369 (w), 1243 (w), 1203 (w), 1160 (w), 1004 (w), 773 (w). HRMS-ESI (m/z): [M + H]<sup>+</sup> calcd for [C<sub>16</sub>H<sub>24</sub>NO<sub>3</sub>]<sup>+</sup> 278.1756; found 278.1751.  $[\alpha]_D^{20} = +65.6$  (*c* = 0.470, CHCl<sub>3</sub>).

### Synthesis of the ketal **S19**.

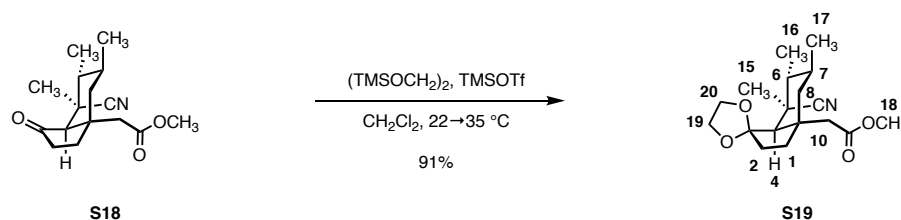

Trimethylsilyl trifluoromethanesulfonate (131  $\mu$ L, 721  $\mu$ mol, 2.00 equiv) was added rapidly via syringe to a solution of 1,2-bis(trimethylsiloxy)ethane (442  $\mu$ L, 1.80 mmol, 5.00 equiv) and the cyanoester **S18** [100 mg, 360  $\mu$ mol, 1 equiv; dried by azeotropic distillation from benzene ( $3 \times 2.0$  mL)] in dichloromethane (1.8 mL) at 22 °C. The reaction vessel was placed in an oil bath that had been preheated to 35 °C. The reaction mixture was stirred for 4 d at 35 °C. The product mixture was cooled to 22 °C over 20 min. The cooled product mixture was diluted with ether (10 mL). The diluted solution was carefully poured into saturated aqueous sodium bicarbonate solution (15 mL) that had been precooled to 0 °C. The resulting biphasic mixture was transferred to a separatory funnel and the layers that formed were separated. The aqueous layer was extracted with ether ( $3 \times 10$  mL). The organic layers were combined and the combined organic layers were washed with saturated aqueous sodium chloride solution (30 mL). The washed organic layer was dried over magnesium sulfate. The dried solution was filtered and the filtrate was concentrated. The residue obtained was purified by flash-column chromatography (eluting with 10% ethyl acetate–hexanes initially, grading to 25% ethyl acetate–hexanes, three steps) to provide the ketal **S19** as a pale yellow oil (105 mg, 91%).

$R_f$  = 0.37 (20% ethyl acetate–hexanes; PAA).  $^1\text{H}$  NMR (400 MHz,  $\text{CDCl}_3$ )  $\delta$  4.00 – 3.73 (m, 4H, H<sub>19</sub>, H<sub>20</sub>), 3.65 (s, 3H, H<sub>18</sub>), 3.07 (d,  $J$  = 15.0 Hz, 1H, H<sub>10a</sub>), 2.57 (d,  $J$  = 15.0 Hz, 1H, H<sub>10b</sub>), 2.50 (d,  $J$  = 2.0 Hz, 1H, H<sub>4</sub>), 1.88 – 1.80 (m, 2H, H<sub>2</sub>), 1.80 – 1.68 (m, 2H, H<sub>1a</sub>, H<sub>6</sub>), 1.67 – 1.54 (m, 3H, H<sub>1b</sub>, H<sub>7</sub>, H<sub>8a</sub>), 1.47 (s, 3H, H<sub>15</sub>), 1.40 – 1.30 (m, 1H, H<sub>8b</sub>), 1.07 (d,  $J$  = 6.6 Hz, 3H, H<sub>16</sub>), 0.96 (d,  $J$  = 6.2 Hz, 3H, H<sub>17</sub>).  $^{13}\text{C}$  NMR (100 MHz,  $\text{CDCl}_3$ )  $\delta$  172.5 (C), 124.6 (C), 118.9 (C), 63.9 (CH<sub>2</sub>), 62.2 (CH<sub>2</sub>), 55.0 (CH), 51.4 (CH), 42.8 (CH<sub>2</sub>), 42.8 (C), 41.8 (CH), 39.5 (CH<sub>2</sub>), 39.2 (C), 35.3 (CH<sub>2</sub>), 34.1 (CH<sub>2</sub>), 31.7 (CH), 22.8 (CH<sub>3</sub>), 20.4 (CH<sub>3</sub>), 13.9 (CH<sub>3</sub>). IR (ATR-FTIR),  $\text{cm}^{-1}$ : 2951 (w), 2884 (w), 2359 (w), 1736 (s), 1457 (w), 1331 (w), 1164 (m), 1101 (w), 1066 (w), 1027 (w), 948 (w), 772 (w). HRMS-ESI ( $m/z$ ):  $[\text{M} + \text{H}]^+$  calcd for  $[\text{C}_{18}\text{H}_{28}\text{NO}_4]^+$  322.2018; found 322.2013.  $[\alpha]_D^{20} = -15.7$  ( $c = 0.340$ ,  $\text{CHCl}_3$ ).

Synthesis of the methylation product **S20**.

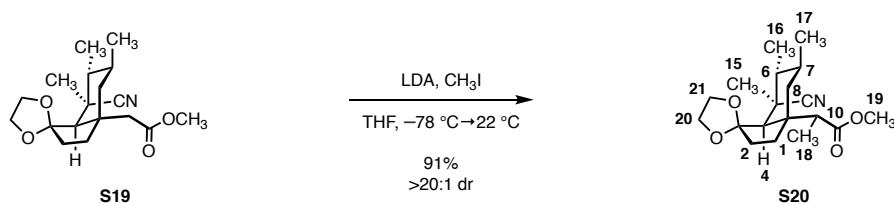

A solution of lithium diisopropylamide in tetrahydrofuran (1.2 M, 1.50 mL, 1.75 mmol, 1.20 equiv) was added to the solution of the ketal **S19** [468 mg, 1.46 mmol, 1 equiv; dried by azeotropic distillation from benzene (3 × 5.0 mL)] in tetrahydrofuran (7.0 mL) at  $-78\text{ }^{\circ}\text{C}$ . The reaction mixture was stirred for 2 h at  $-78\text{ }^{\circ}\text{C}$ . The reaction mixture was warmed to  $0\text{ }^{\circ}\text{C}$  over 10 min and stirred for an additional 1 h at  $0\text{ }^{\circ}\text{C}$ . The reaction mixture was cooled to  $-78\text{ }^{\circ}\text{C}$  over 30 min. Iodomethane (272  $\mu\text{L}$ , 4.37 mmol, 3.00 equiv) was added dropwise over 5 min to the cooled reaction mixture. The reaction mixture was stirred for 1 h at  $-78\text{ }^{\circ}\text{C}$ . The cooling bath was removed, and the reaction mixture was allowed to warm to  $22\text{ }^{\circ}\text{C}$  over 2 h. The warmed reaction mixture was stirred for 15 h at  $22\text{ }^{\circ}\text{C}$ . The product mixture was diluted sequentially with ether (10 mL) and saturated aqueous ammonium chloride solution (10 mL). The resulting biphasic mixture was stirred for 15 min at  $22\text{ }^{\circ}\text{C}$ . The stirred biphasic mixture was transferred to a separatory funnel and the layers that formed were separated. The aqueous layer was extracted with ether (3 × 10 mL). The organic layers were combined and the combined organic layers were washed sequentially with water (30 mL) and saturated aqueous sodium chloride solution (30 mL). The washed organic layer was dried over magnesium sulfate. The dried solution was filtered and the filtrate was concentrated. The residue obtained was purified by flash-column chromatography (eluting with 10% ethyl acetate–hexanes initially, grading to 25% ethyl acetate–hexanes, three steps) to provide the methylation product **S20** as a white, crystalline solid (445 mg, 91%).

Within the limits of detection (500 MHz  $^1\text{H}$  NMR analysis), the methylation product **S20** was formed as a single diastereomer. The relative stereochemistry of **S20** was determined by X-ray analysis (see page S165).

$R_f = 0.44$  (20% ethyl acetate–hexanes; PAA).  $^1\text{H}$  NMR (500 MHz,  $\text{CDCl}_3$ )  $\delta$  4.01 – 3.94 (m, 1H,  $\text{H}_{20\text{a}}$  or  $\text{H}_{21\text{a}}$ ), 3.92 – 3.76 (m, 3H,  $\text{H}_{20\text{a}}$  or  $\text{H}_{21\text{a}}$ ,  $\text{H}_{20\text{b}}$ ,  $\text{H}_{21\text{b}}$ ), 3.71 (s, 3H,  $\text{H}_{19}$ ), 3.42 (q,  $J = 7.2$  Hz, 1H,  $\text{H}_{10}$ ), 2.92 (s, 1H,  $\text{H}_4$ ), 2.11 (ddd,  $J = 12.7, 10.3, 8.4$  Hz, 1H,  $\text{H}_{2\text{a}}$ ), 1.84 – 1.78 (m, 2H,  $\text{H}_1$ ), 1.75 (ddd,  $J = 13.3, 8.4, 5.7$  Hz, 1H,  $\text{H}_6$ ), 1.56 – 1.50 (m, 1H,  $\text{H}_{8\text{a}}$ ), 1.48 (s, 4H,  $\text{H}_7, \text{H}_{15}$ ), 1.37 (dd,  $J = 13.9, 12.2$  Hz, 1H,  $\text{H}_{8\text{b}}$ ), 1.28 (ddd,  $J = 14.4, 8.5, 6.3$  Hz, 1H,  $\text{H}_{2\text{b}}$ ), 1.17 (d,  $J = 7.2$  Hz, 3H,  $\text{H}_{18}$ ), 1.07 (d,  $J = 6.7$  Hz, 3H,  $\text{H}_{16}$ ), 0.94 (d,  $J = 6.2$  Hz, 3H,  $\text{H}_{17}$ ).  $^{13}\text{C}$  NMR (125 MHz,  $\text{CDCl}_3$ )  $\delta$  176.1 (C), 124.5 (C), 119.3 (C), 63.9 ( $\text{CH}_2$ ), 62.2 ( $\text{CH}_2$ ), 51.6 ( $\text{CH}_3$ ), 51.5 (CH), 45.1 (C), 42.2 (CH), 41.7 (CH), 39.9 ( $\text{CH}_2$ ), 39.3 (C), 34.7 ( $\text{CH}_2$ ), 31.2 (CH), 29.5 ( $\text{CH}_2$ ), 23.1 ( $\text{CH}_3$ ), 20.5 ( $\text{CH}_3$ ), 13.9 ( $\text{CH}_3$ ), 13.7 ( $\text{CH}_3$ ). IR (ATR-FTIR),  $\text{cm}^{-1}$ : 2951 (w), 2882 (w), 2360 (s), 2340 (m), 2162 (w), 2005 (w), 1731 (m), 1457 (w), 1196 (w), 1158 (w), 1096 (w), 1027 (w). HRMS-ESI ( $m/z$ ):  $[\text{M} + \text{H}]^+$  calcd for  $[\text{C}_{19}\text{H}_{30}\text{NO}_4]^+$  336.2175; found 336.2169.  $[\alpha]_D^{20} = -45.8$  ( $c = 0.230, \text{CHCl}_3$ ).

### Synthesis of the aldehyde **S21**.

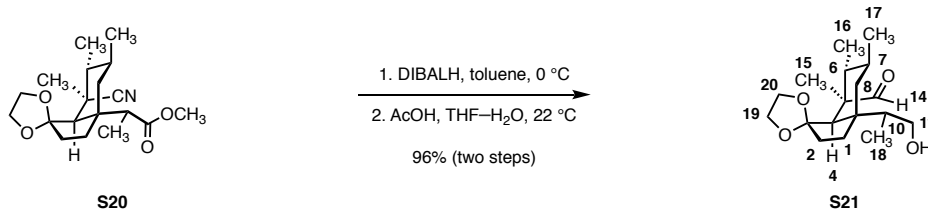

A solution of diisobutylaluminum hydride solution in toluene (1.0 M, 2.20 mL, 2.19 mmol, 3.50 equiv) was added over 1 min via syringe to a solution of the ester **S20** [210 mg, 630  $\mu$ mol, 1 equiv; dried by azeotropic distillation with benzene ( $3 \times 5.0$  mL)] in toluene (3.0 mL) at 0 °C. The reaction mixture was stirred for 15 min at 0 °C. The product mixture was diluted sequentially with ethyl acetate (10 mL) and saturated aqueous potassium sodium tartrate solution (10 mL). The resulting biphasic mixture was stirred vigorously for 2 h at 22 °C. The stirred biphasic mixture was transferred to a separatory funnel and the layers that formed were separated. The aqueous layer was extracted with ethyl acetate ( $2 \times 10$  mL). The organic layers were combined and the combined organic layers were washed with saturated aqueous sodium chloride solution (30 mL). The washed organic layer was dried over magnesium sulfate. The dried solution was filtered and the filtrate was concentrated. The residue obtained was used directly in the following step.

Acetic acid (36.0  $\mu$ L, 630  $\mu$ mol, 1.00 equiv) was added to a solution of the unpurified product obtained in the preceding step (nominally 630  $\mu$ mol, 1 equiv) in 4:1 tetrahydrofuran–water (v/v, 18 mL) at 22 °C. The reaction mixture was stirred for 1 h at 22 °C. The product mixture was diluted sequentially with ethyl acetate (10 mL) and saturated aqueous sodium bicarbonate solution (10 mL). The resulting biphasic mixture was transferred to a separatory funnel and the layers that formed were separated. The aqueous layer was extracted with ethyl acetate ( $3 \times 10$  mL). The organic layers were combined and the combined organic layers were washed with saturated aqueous sodium chloride solution (30 mL). The washed organic layer was dried over magnesium sulfate. The dried solution was filtered and the filtrate was concentrated to provide the aldehyde **S21** as a colorless oil (186 mg, 96% over two steps). The purity of the aldehyde **S21** was determined to be >95% by quantitative  $^1\text{H}$  NMR analysis (600 MHz).

$R_f = 0.32$  (40% ethyl acetate–hexanes; PAA).  $^1\text{H}$  NMR (600 MHz,  $\text{C}_6\text{D}_6$ )  $\delta$  9.67 (s, 1H, H<sub>14</sub>), 3.82 (dd,  $J = 10.6, 3.2$  Hz, 1H, H<sub>11a</sub>), 3.46 – 3.35 (m, 2H, H<sub>19a</sub>, H<sub>20a</sub>), 3.33 (q,  $J = 6.5, 5.8$  Hz, 1H, H<sub>19b</sub> or 20b), 3.27 (q,  $J = 6.2$  Hz, 1H, H<sub>19b</sub> or 20b), 3.19 (dd,  $J = 10.6, 7.9$  Hz, 1H, H<sub>11b</sub>), 2.95 (s, 1H, H<sub>4</sub>), 1.91 (dp,  $J = 15.7, 7.6$  Hz, 1H, H<sub>6</sub>), 1.71 – 1.61 (m, 2H, H<sub>2</sub>), 1.58 (ddq,  $J = 10.8, 6.7, 3.6$  Hz, 1H, H<sub>10</sub>), 1.47 – 1.27 (m, 4H, H<sub>1a</sub>, H<sub>7</sub>, H<sub>8</sub>), 1.18 (s, 3H, H<sub>15</sub>), 1.12 – 1.01 (m, 1H, H<sub>1b</sub>), 0.99 (d,  $J = 7.0$  Hz, 3H, H<sub>16</sub>), 0.92 (d,  $J = 6.6$  Hz, 3H, H<sub>18</sub>), 0.87 (d,  $J = 5.9$  Hz, 3H, H<sub>17</sub>).  $^{13}\text{C}$  NMR (150 MHz,  $\text{C}_6\text{D}_6$ )  $\delta$  206.2 (CH), 120.2 (C), 64.5 (CH<sub>2</sub>), 63.8 (CH<sub>2</sub>), 62.0 (CH<sub>2</sub>), 50.9 (C), 50.0 (CH), 46.0 (C), 41.8 (CH), 40.3 (CH<sub>2</sub>), 37.9 (CH), 35.9 (CH<sub>2</sub>), 30.7 (CH), 28.4 (CH<sub>2</sub>), 21.2 (CH<sub>3</sub>), 19.4 (CH<sub>3</sub>), 13.2 (CH<sub>3</sub>), 12.6 (CH<sub>3</sub>). IR (ATR-FTIR),  $\text{cm}^{-1}$ : 3480 (w), 2971 (m), 2946 (m), 2886 (m), 1452 (w), 1378 (w), 1312 (w), 1232 (w), 1144 (w), 1107 (m), 1085 (s), 1044 (s), 1022 (s), 949 (w). HRMS-ESI (m/z):  $[\text{M} + \text{H}]^+$  calcd for  $[\text{C}_{18}\text{H}_{31}\text{O}_4]^+$  311.2222; found 311.2217.  $[\alpha]_D^{20} = -85.9$  ( $c = 0.040$ ,  $\text{CHCl}_3$ ).

*Synthesis of the homopropargylic alcohol S22.*

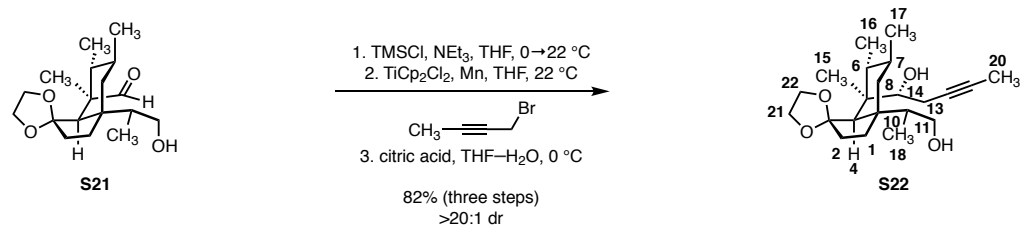

Trimethylsilyl chloride (45.0  $\mu$ L, 354  $\mu$ mol, 1.10 equiv) was added dropwise over 1 min to a solution of triethylamine (358  $\mu$ L, 2.58 mmol, 4.00 equiv) and the aldehyde **S21** (100 mg, 322  $\mu$ mol, 1 equiv) in tetrahydrofuran (6.0 mL) at 0 °C. Upon completion of the addition, the cooling bath was removed and the reaction mixture was allowed to warm to 22 °C over 2 h. The product mixture was cooled to 0 °C over 10 min and the cooled product mixture was diluted sequentially with ether (10 mL) and aqueous potassium phosphate buffer solution (pH 7, 10 mL). The resulting biphasic mixture was transferred to a separatory funnel and the layers that formed were separated. The aqueous layer was extracted with ether (2  $\times$  10 mL). The organic layers were combined and the combined organic layers were washed with saturated aqueous sodium chloride solution (10 mL). The washed organic layer was dried over magnesium sulfate. The dried solution was filtered and the filtrate was concentrated. The residue obtained was used directly in the following step.

A mixture of bis(cyclopentadienyl)titanium(IV) dichloride (234 mg, 940  $\mu$ mol, 3.00 equiv) and manganese powder (207 mg, 3.77 mmol, 12.0 equiv) in tetrahydrofuran (4.0 mL) was stirred vigorously at 22 °C until a light green color persisted (approximately 30 min). A solution of the protected alcohol obtained in the preceding step (nominally 314  $\mu$ mol, 1 equiv) and 1-bromobut-2-yne (170 mg, 1.26 mmol, 4.00 equiv) in tetrahydrofuran (4.0 mL) was added dropwise over 40 min at 22 °C via syringe pump. The reaction mixture was stirred for 2 h at 22 °C. The product mixture was diluted with hexanes (10 mL). The diluted product mixture was eluted over a plug of silica gel (2.0 cm  $\times$  2.0 cm, eluting with 30% ether–hexanes). The filtrates were combined and the combined filtrates were concentrated. The residue obtained was used directly in the following step.

Aqueous citric acid solution (10% w/v, 2.1 mL) was added dropwise to a solution of the unpurified addition product obtained in the preceding step (nominally 314  $\mu$ mol, 1 equiv) in tetrahydrofuran (7.0 mL) at 0 °C. The reaction mixture was stirred for 30 min at 0 °C. The product mixture was diluted sequentially with ethyl acetate (10 mL) and saturated aqueous sodium bicarbonate solution (10 mL). The resulting biphasic mixture was transferred to a separatory funnel and the layers that formed were separated. The aqueous layer was extracted with ethyl acetate (4  $\times$  20 mL). The organic layers were combined and the combined organic layers were washed with saturated aqueous sodium chloride solution (30 mL). The washed organic layer was dried over magnesium sulfate. The dried solution was filtered and the filtrate was concentrated. The residue obtained was purified by flash-column chromatography (eluting with 15% ethyl acetate–hexanes initially, grading to 40% ethyl acetate–hexanes, five steps) to provide the homopropargylic alcohol **S22** as an off-white foam (93.2 mg, 82% over three steps).

<sup>1</sup>H NMR analysis (500 MHz) of the unpurified product mixture indicated the presence of a >20:1 mixture of diastereomers.

$R_f = 0.31$  (40% ethyl acetate–hexanes; PAA). <sup>1</sup>H NMR (500 MHz, C<sub>6</sub>D<sub>6</sub>)  $\delta$  4.28 (dt,  $J = 10.1, 2.5$  Hz, 1H, H<sub>14</sub>), 3.74 (dd,  $J = 11.2, 2.7$  Hz, 1H, H<sub>11a</sub>), 3.52 – 3.40 (m, 2H, H<sub>21a</sub>, H<sub>22a</sub>), 3.40 – 3.32 (m, 2H, H<sub>11b</sub>, H<sub>21b</sub> or 22b), 3.27 (td,  $J = 7.1, 5.1$  Hz, 1H, H<sub>21b</sub> or 22b), 2.63 (dp,  $J = 16.6, 2.4$  Hz, 1H, H<sub>13a</sub>), 2.45 (s, 1H, H<sub>4</sub>), 2.42 – 2.32 (m, 1H, H<sub>13b</sub>), 2.02 – 1.88 (m, 2H, H<sub>6</sub>, H<sub>10</sub>), 1.71 – 1.62 (m, 2H, H<sub>2a</sub>, H<sub>8a</sub>), 1.60 – 1.51 (m, 1H, H<sub>2b</sub>), 1.51 – 1.40 (m, 5H, H<sub>1a</sub>, H<sub>7</sub>, H<sub>20</sub>), 1.36 (dd,  $J = 13.6, 12.3$  Hz, 1H, H<sub>8b</sub>), 1.27 (t,  $J = 3.7$  Hz, 6H, H<sub>15</sub>, H<sub>18</sub>), 1.09 – 0.98 (m, 4H, H<sub>1b</sub>, H<sub>16</sub>), 0.95 (d,  $J = 6.5$  Hz, 3H, H<sub>17</sub>). <sup>13</sup>C NMR (150 MHz, C<sub>6</sub>D<sub>6</sub>)  $\delta$  120.6 (C), 78.4 (C), 78.1 (C), 74.8 (CH), 65.6 (CH<sub>2</sub>), 64.0 (CH<sub>2</sub>), 62.1 (CH<sub>2</sub>), 49.1 (CH), 46.1 (C), 45.2 (CH), 44.1 (C), 43.0 (CH<sub>2</sub>), 40.9 (CH), 35.5 (CH<sub>2</sub>), 30.3 (CH), 29.9 (CH<sub>2</sub>), 24.7 (CH<sub>2</sub>), 22.1 (CH<sub>3</sub>), 17.8 (CH<sub>3</sub>), 17.1 (CH<sub>3</sub>), 14.0 (CH<sub>3</sub>), 3.3 (CH<sub>3</sub>). IR (ATR-FTIR), cm<sup>-1</sup>, 3496 (w), 2951 (s), 2884 (m), 1456 (w), 1373 (w), 1338 (w), 1186 (w), 1159 (w), 1103 (w), 1022 (s), 940 (w). HRMS-ESI (m/z): [M + H]<sup>+</sup> calcd for [C<sub>22</sub>H<sub>37</sub>O<sub>4</sub>]<sup>+</sup> 365.2692, found 365.2686.  $[\alpha]_D^{20} = -4.39$  ( $c = 0.175$ , CHCl<sub>3</sub>).

*Synthesis of the aldehyde S23.*

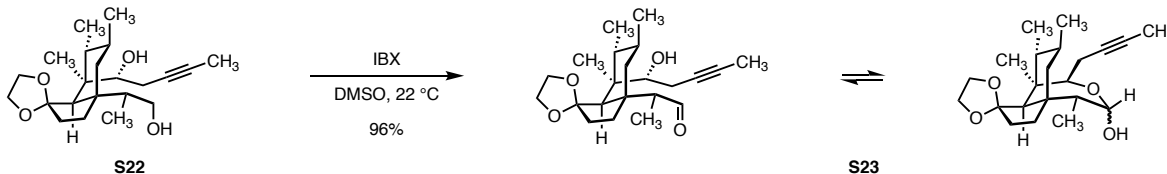

2-Iodoxybenzoic acid (36.9 mg, 132  $\mu\text{mol}$ , 1.00 equiv) was added in one portion to a solution of the homopropargylic alcohol **S22** (48.0 mg, 132  $\mu\text{mol}$ , 1.00 equiv) in dimethylsulfoxide (1.6 mL) at 22 °C. The reaction mixture was stirred for 3 h at 22 °C. The product mixture was diluted sequentially with ether (5.0 mL), saturated aqueous sodium bicarbonate solution (5.0 mL), and saturated aqueous sodium thiosulfate solution (5.0 mL) at 22 °C. The resulting biphasic mixture was stirred vigorously for 30 min at 22 °C. The stirred biphasic mixture was transferred to a separatory funnel and the layers that formed were separated. The aqueous phase was extracted with ether (3  $\times$  5.0 mL). The organic layers were combined and the combined organic layers were washed with saturated aqueous sodium chloride solution (10 mL). The washed organic layer was dried over magnesium sulfate. The dried solution was filtered, and the filtrate was concentrated. The residue obtained was purified by flash-column chromatography (eluting with 5% ethyl acetate–hexanes initially, grading to 20% ethyl acetate–hexanes, three steps) to provide the aldehyde **S23** as a white foam (46.0 mg, 96%). The product **S23** was used immediately in the following step.

$^1\text{H}$  NMR analysis (400 MHz) of the purified product mixture indicated the presence of a 1:1 mixture of hydroxyaldehyde and hemiketal.



Synthesis of the allylic ether **44**.

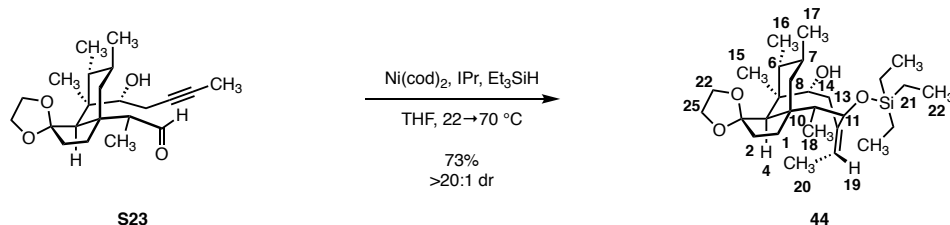

A solution of bis(cyclooctadiene)nickel(0) (4.90 mg, 17.9  $\mu\text{mol}$ , 0.20 equiv) and 1,3-bis(2,6-diisopropylphenyl)imidazol-2-ylidene (IPr, 7.00 mg, 17.9  $\mu\text{mol}$ , 0.20 equiv) in tetrahydrofuran (230  $\mu\text{L}$ ) was stirred for 30 min at 22  $^{\circ}\text{C}$  in a nitrogen-filled glovebox. The resulting solution was added to a solution of triethylsilane (43.0  $\mu\text{L}$ , 269  $\mu\text{mol}$ , 3.00 equiv) and the alkynyl aldehyde **S23** (36.1 mg, 86.9  $\mu\text{mol}$ , 1 equiv) in tetrahydrofuran (2.2 mL) in a round-bottomed flask fused to a Teflon-coated valve at 22  $^{\circ}\text{C}$  in a nitrogen-filled glovebox. The reaction vessel was sealed and the sealed reaction vessel was removed from the glovebox. The reaction vessel was placed in an oil bath that had been preheated to 70  $^{\circ}\text{C}$ . The reaction mixture was stirred at 3 h at 70  $^{\circ}\text{C}$ . The product mixture was cooled to 22  $^{\circ}\text{C}$  over 15 min. The cooled product mixture was eluted over a short pad of silica gel (2.0 cm  $\times$  2.0 cm, eluting with 30% ether–hexanes). The filtrates were combined and the combined filtrates were concentrated. The residue obtained was purified by flash-column chromatography (eluting with 5% ether–hexanes initially, grading to 30% ether–hexanes, four steps) to provide the allylic ether **44** as a clear oil (31 mg, 73%).

Within the limits of detection (500 MHz  $^1\text{H}$  NMR analysis), the allylic ether **44** was formed as a single diastereomer. The relative stereochemistry of the C14 alcohol was determined by NOE correlations between H14 and H10.

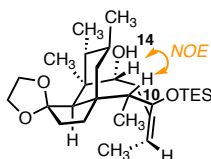

$R_f$  = 0.64 (30% ether–hexanes; PAA).  $^1\text{H}$  NMR (500 MHz,  $\text{CDCl}_3$ )  $\delta$  5.33 – 5.25 (m, 1H, H<sub>19</sub>), 4.81 (dd,  $J$  = 11.5, 4.6 Hz, 1H, H<sub>14</sub>), 3.96 (q,  $J$  = 6.4, 5.7 Hz, 1H, H<sub>23a</sub> or 24a), 3.89 (d,  $J$  = 8.7 Hz, 1H, H<sub>11</sub>), 3.81 (tt,  $J$  = 13.5, 6.8 Hz, 2H, H<sub>23b</sub> or 24b), 3.67 (p,  $J$  = 7.3, 6.6 Hz, 1H, H<sub>23a</sub> or 24a), 3.16 (s, 1H, H<sub>4</sub>), 2.58 (dd,  $J$  = 15.1, 11.4 Hz, 1H, H<sub>13a</sub>), 2.31 (d,  $J$  = 15.2 Hz, 1H, H<sub>13b</sub>), 2.21 – 2.12 (m, 1H, H<sub>10</sub>), 1.85 (dd,  $J$  = 10.9, 7.0 Hz, 1H, H<sub>6</sub>), 1.79 – 1.66 (m, 3H, H<sub>2</sub>, H<sub>7</sub>), 1.64 (dd,  $J$  = 6.7, 1.8 Hz, 3H, H<sub>20</sub>), 1.45 – 1.37 (m, 1H, H<sub>8a</sub>), 1.26 (td,  $J$  = 24.2, 22.7, 10.9 Hz, 3H, H<sub>1</sub>, H<sub>8b</sub>), 1.08 – 0.99 (m, 6H, H<sub>15</sub>, H<sub>18</sub>), 0.97 (d,  $J$  = 7.0 Hz, 3H, H<sub>16</sub>), 0.92 (dd,  $J$  = 9.9, 6.4 Hz, 12H, H<sub>17</sub>, H<sub>22</sub>), 0.57 (p,  $J$  = 8.7, 7.9 Hz, 6H, H<sub>21</sub>).  $^{13}\text{C}$  NMR (150 MHz,  $\text{CDCl}_3$ )  $\delta$  142.7 (C), 121.3 (CH), 120.1 (C), 85.0 (CH), 70.3 (CH), 64.0 (CH<sub>2</sub>), 61.6 (CH<sub>2</sub>), 51.0 (CH), 45.7 (C), 44.0 (C), 43.1 (CH), 42.9 (CH), 38.9 (CH<sub>2</sub>), 36.1 (CH<sub>2</sub>), 33.9 (CH<sub>2</sub>), 30.6 (CH), 28.7 (CH<sub>2</sub>), 21.4 (CH<sub>3</sub>), 16.2 (CH<sub>3</sub>), 15.4 (CH<sub>3</sub>), 14.4 (CH<sub>3</sub>), 13.5 (CH<sub>3</sub>), 7.2 (3  $\times$  CH<sub>3</sub>), 5.3 (3  $\times$  CH<sub>2</sub>). IR (ATR-FTIR),  $\text{cm}^{-1}$ : 3392 (w), 2923 (s), 2853 (m), 1725 (w), 1670 (w), 1457 (w), 1375 (w), 1261 (m), 1094 (s), 1016 (s), 800 (s), 725 (w). HRMS-ESI ( $m/z$ ):  $[\text{M} + \text{Na}]^+$  calcd for  $[\text{C}_{28}\text{H}_{50}\text{O}_4\text{SiNa}]^+$  501.3376; found 501.3371.  $[\alpha]_D^{20} = -15.6$  ( $c$  = 0.030,  $\text{CHCl}_3$ ).

### Synthesis of the sulfonate **S24**.

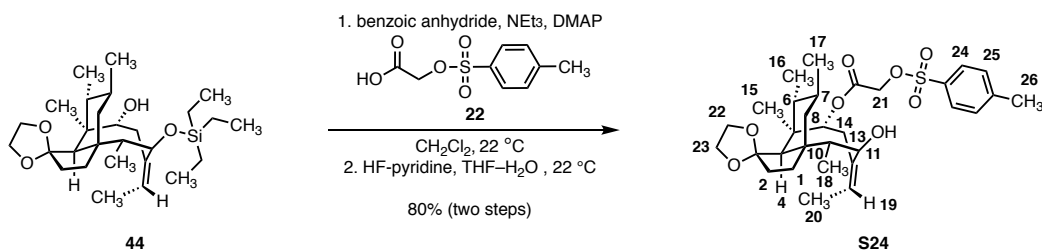

(4-Dimethylamino)pyridine (300  $\mu$ g, 2.50  $\mu$ mol, 0.10 equiv) was added to a solution of the sulfonate **22** (31.7 mg, 138  $\mu$ mol, 5.50 equiv), benzoic anhydride (31.2 mg, 138  $\mu$ mol, 5.50 equiv), triethylamine (23.0  $\mu$ L, 163  $\mu$ mol, 6.50 equiv), and the allylic ether **44** [12.0 mg, 25.1  $\mu$ mol, 1 equiv; dried by azeotropic distillation with benzene (3  $\times$  1.0 mL)] in dichloromethane (250  $\mu$ L) at 22 °C. The reaction mixture was stirred for 2 h at 22 °C. The product mixture was diluted sequentially with ether (2.0 mL) and 1 N aqueous sodium hydroxide solution (1.0 mL). The resulting biphasic mixture was transferred to a separatory funnel and the layers that formed were separated. The aqueous layer was extracted with ether (4  $\times$  2.0 mL). The organic layers were combined and the combined organic layers were washed with saturated aqueous sodium chloride solution (4.0 mL). The washed organic layer was dried over magnesium sulfate. The dried solution was filtered and the filtrate was concentrated. The residue obtained was used directly in the following step.

Hydrogen fluoride–pyridine complex (21.0  $\mu$ L, 50.2  $\mu$ mol, 2.00 equiv) was added to a solution of the unpurified product obtained in the preceding step (nominally 25.1  $\mu$ mol, 1 equiv) in 2:1 tetrahydrofuran–water (v/v, 500  $\mu$ L) at 22 °C. The reaction mixture was stirred for 16 h at 22 °C. The product mixture was diluted sequentially with ethyl acetate (1.0 mL) and saturated aqueous sodium bicarbonate solution (1.0 mL). The resulting biphasic mixture was transferred to a separatory funnel and the layers that formed were separated. The aqueous layer was extracted with ethyl acetate (3  $\times$  1.0 mL). The organic layers were combined and the combined organic layers were washed with saturated aqueous sodium chloride solution (2.0 mL). The washed organic layer was dried over magnesium sulfate. The dried solution was filtered and the filtrate was concentrated. The residue obtained was purified by flash-column chromatography (eluting with 10% ethyl acetate–hexanes initially, grading to 50% ethyl acetate–hexanes, four steps) to provide the sulfonate **S24** as a white foam (44.0 mg, 80% over two steps).

$R_f$  = 0.49 (30% ethyl acetate–hexanes; PAA). <sup>1</sup>H NMR (400 MHz, CDCl<sub>3</sub>)  $\delta$  7.82 (d,  $J$  = 8.3 Hz, 2H, H<sub>24</sub>), 7.33 (d,  $J$  = 8.0 Hz, 2H, H<sub>25</sub>), 5.95 (dd,  $J$  = 11.8, 4.6 Hz, 1H, H<sub>14</sub>), 5.41 (qd,  $J$  = 6.7, 2.6 Hz, 1H, H<sub>19</sub>), 4.52 (s, 2H, H<sub>21</sub>), 3.99 – 3.90 (m, 1H, H<sub>22a</sub> or 23a), 3.87 (d,  $J$  = 9.3 Hz, 1H, H<sub>11</sub>), 3.85 – 3.69 (m, 2H, H<sub>22b</sub>, H<sub>23b</sub>), 3.71 – 3.61 (m, 1H, H<sub>22a</sub> or 23a), 3.03 (d,  $J$  = 2.6 Hz, 1H, H<sub>4</sub>), 2.64 (dd,  $J$  = 15.4, 11.7 Hz, 1H, H<sub>13a</sub>), 2.43 (s, 3H, H<sub>26</sub>), 2.37 – 1.99 (m, 2H, H<sub>10</sub>, H<sub>13b</sub>), 1.84 (dq,  $J$  = 11.0, 7.4 Hz, 1H, H<sub>6</sub>), 1.79 – 1.66 (m, 2H, H<sub>1</sub>), 1.63 (dd,  $J$  = 6.7, 1.8 Hz, 3H, H<sub>20</sub>), 1.62 – 1.47 (m, 1H, H<sub>7</sub>), 1.48 – 1.14 (m, 4H, H<sub>2</sub>, H<sub>8</sub>), 1.09 (d,  $J$  = 6.1 Hz, 6H, H<sub>15</sub>, H<sub>18</sub>), 0.83 (d,  $J$  = 6.3 Hz, 3H, H<sub>17</sub>), 0.62 (d,  $J$  = 7.1 Hz, 3H, H<sub>16</sub>). <sup>13</sup>C NMR (100 MHz, CDCl<sub>3</sub>)  $\delta$  165.5 (C), 145.4 (C), 141.2 (C), 132.8 (C), 130.0 (2  $\times$  CH), 128.3 (2  $\times$  CH), 122.9 (CH), 119.8 (C), 83.7 (CH), 74.4 (CH), 65.2 (CH<sub>2</sub>), 64.0 (CH<sub>2</sub>), 61.6 (CH<sub>2</sub>), 51.0 (CH), 45.7 (C), 43.2 (C), 42.5 (CH), 42.4 (CH), 38.5 (CH<sub>2</sub>), 36.0 (CH<sub>2</sub>), 30.6 (CH), 29.7 (CH<sub>2</sub>), 28.8 (CH<sub>2</sub>), 21.8 (CH<sub>3</sub>), 21.1 (CH<sub>3</sub>), 16.1 (CH<sub>3</sub>), 15.7 (CH<sub>3</sub>),

14.1 (CH<sub>3</sub>), 13.6 (CH<sub>3</sub>). IR (ATR-FTIR), cm<sup>-1</sup>: 2927 (m), 2881 (w), 2365 (m), 2338 (m), 1759 (w), 1733 (w), 1454 (w), 1371 (m), 1298 (w), 1221 (w), 1178 (s), 1096 (w), 1038 (m), 816 (w), 773 (w). HRMS-ESI (m/z): [M + Na]<sup>+</sup> calcd for [C<sub>31</sub>H<sub>44</sub>O<sub>8</sub>SNa]<sup>+</sup> 599.2655; found 599.2649.  $[\alpha]_D^{20} = +2.65$  (*c* = 0.205, CHCl<sub>3</sub>).

Synthesis of the reduction product **S25**.

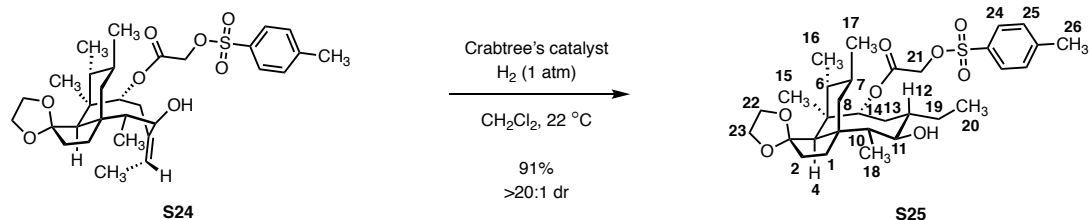

Crabtree's catalyst (400 μg, 0.50 μmol, 0.05 equiv) was added to a solution of the alkene **S24** [5.50 mg, 9.50 μmol, 1 equiv; dried by azeotropic distillation with benzene (3 × 1.0 mL)] in dichloromethane (950 μL) at 22 °C. The reaction vessel was purged with dihydrogen and placed under a balloon of dihydrogen. The reaction mixture was stirred for 1 h at 22 °C. The product mixture was concentrated. The residue obtained was purified by flash-column chromatography (eluting with 10% ethyl acetate–hexanes initially, grading to 50% ethyl acetate–hexanes, three steps) to provide the reduction product **S25** as a clear oil (5.00 mg, 91%).

Within the limits of detection (500 MHz <sup>1</sup>H NMR analysis), **S25** was formed as a single diastereomer. The C12 configuration depicted is supported by NOE correlations between H14 and H12. The C11 configuration depicted is supported by NOE correlations between H11 and H4.

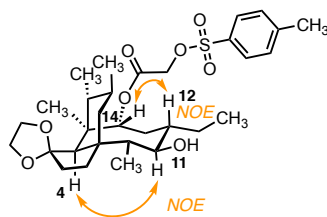

$R_f = 0.45$  (30% ethyl acetate–hexanes; PAA). <sup>1</sup>H NMR (500 MHz, CDCl<sub>3</sub>) δ 7.83 (d,  $J = 8.3$  Hz, 2H, H<sub>24</sub>), 7.35 (d,  $J = 7.9$  Hz, 2H, H<sub>25</sub>), 5.39 (d,  $J = 8.3$  Hz, 1H, H<sub>14</sub>), 4.52 (s, 2H, H<sub>21</sub>), 4.02 (q,  $J = 6.0, 4.8$  Hz, 1H, H<sub>22a</sub> or H<sub>23a</sub>), 3.88 (tt,  $J = 13.2, 6.7$  Hz, 2H, H<sub>22b</sub> or H<sub>23b</sub>), 3.75 (q,  $J = 7.6, 6.4$  Hz, 1H, H<sub>22a</sub> or H<sub>23a</sub>), 3.37 – 3.31 (m, 1H, H<sub>11</sub>), 2.45 (s, 3H, H<sub>26</sub>), 2.15 – 2.06 (m, 1H, H<sub>10</sub>), 1.98 (s, 1H, H<sub>4</sub>), 1.95 – 1.84 (m, 2H, H<sub>6</sub>, H<sub>13a</sub>), 1.82 – 1.77 (m, 2H, H<sub>1</sub>), 1.76 – 1.35 (m, 5H, H<sub>2a</sub>, H<sub>7</sub>, H<sub>8a</sub>, H<sub>12</sub>, H<sub>19a</sub>), 1.27 (d,  $J = 15.9$  Hz, 4H, H<sub>2b</sub>, H<sub>8b</sub>, H<sub>13b</sub>, H<sub>19b</sub>), 1.06 (s, 3H, H<sub>15</sub>), 0.91 (d,  $J = 7.0$  Hz, 3H, H<sub>18</sub>), 0.86 (t,  $J = 7.0$  Hz, 6H, H<sub>17</sub>, H<sub>20</sub>), 0.64 (d,  $J = 7.1$  Hz, 3H, H<sub>16</sub>). <sup>13</sup>C NMR (150 MHz, CDCl<sub>3</sub>) δ 165.7 (C), 145.4 (C), 132.8 (C), 130.0 (2 × CH), 128.3 (2 × CH), 120.6 (C), 77.0 (CH), 71.7 (CH), 65.3 (CH<sub>2</sub>), 64.0 (CH<sub>2</sub>), 61.7 (CH<sub>2</sub>), 51.3 (CH), 47.9 (CH), 46.2 (C), 42.4 (C), 42.0 (CH), 41.0 (CH), 39.3 (CH<sub>2</sub>), 36.8 (CH<sub>2</sub>), 35.9 (CH<sub>2</sub>), 30.1 (CH), 28.9 (CH<sub>2</sub>), 25.9 (CH<sub>2</sub>), 21.8 (CH<sub>3</sub>), 21.1 (CH<sub>3</sub>), 15.0 (CH<sub>3</sub>), 14.3 (CH<sub>3</sub>), 11.8 (CH<sub>3</sub>), 10.7 (CH<sub>3</sub>). IR (ATR-FTIR), cm<sup>-1</sup>: 2974 (m), 2883 (w), 1754 (m), 1733 (m), 1371 (m), 1178 (s), 1036 (m), 818 (w). HRMS-ESI (m/z): [M + H]<sup>+</sup> calcd for [C<sub>31</sub>H<sub>47</sub>O<sub>8</sub>S]<sup>+</sup> 579.2992; found 579.2986.  $[\alpha]_D^{20} = +21.6$  ( $c = 0.063$ , CHCl<sub>3</sub>).

### Synthesis of the sulfide **S26**.

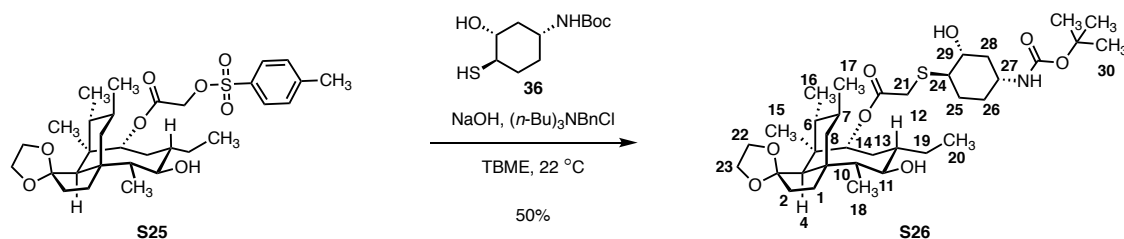

Aqueous sodium hydroxide solution (1 N, 13.8  $\mu$ L, 13.8  $\mu$ mol, 1.60 equiv) was added to a solution of the thiol **36** (3.40 mg, 13.8  $\mu$ mol, 1.6 equiv), benzyl tri-*n*-butylammonium chloride (539  $\mu$ g, 1.70  $\mu$ mol, 0.20 equiv) and the sulfonate **S25** (4.00 mg, 7.10  $\mu$ mol, 1 equiv) in *tert*-butyl methyl ether (200  $\mu$ L) at 22 °C. The reaction mixture was stirred for 2 h at 22 °C. The product mixture was diluted sequentially with dichloromethane (1.0 mL) and 1 N aqueous sodium hydroxide solution (1.0 mL). The resulting biphasic mixture was transferred to a separatory funnel and the layers that formed were separated. The aqueous layer was extracted with dichloromethane (2  $\times$  1.0 mL). The organic layers were combined and the combined organic layers were washed sequentially with aqueous sodium thiosulfate solution (10% w/v, 1.0 mL), 0.1 N aqueous phosphoric acid solution (1.0 mL), saturated aqueous sodium bicarbonate solution (1.0 mL), and saturated aqueous sodium chloride solution (1.0 mL). The washed organic layer was dried over magnesium sulfate. The dried solution was filtered and the filtrate was concentrated. The residue obtained was purified by flash-column chromatography (eluting with 30% ethyl acetate–hexanes initially, grading to 80% ethyl acetate–hexanes, three steps) to provide the sulfide **S26** as a white foam (2.80 mg, 50%).

$R_f$  = 0.16 (80% ethyl acetate–hexanes; PAA). <sup>1</sup>H NMR (600 MHz, CDCl<sub>3</sub>)  $\delta$  5.37 (d,  $J$  = 8.1 Hz, 1H, H<sub>14</sub>), 4.45 (s, 1H, NH), 4.02 (q,  $J$  = 6.3, 5.5 Hz, 1H, H<sub>22a</sub> or H<sub>23a</sub>), 3.94 – 3.83 (m, 2H, H<sub>22b</sub>, H<sub>23b</sub>), 3.79 – 3.71 (m, 1H, H<sub>22a</sub> or H<sub>23a</sub>), 3.52 (d,  $J$  = 14.8 Hz, 2H, H<sub>27</sub>, OH), 3.43 – 3.30 (m, 3H, H<sub>11</sub>, H<sub>21a</sub>, H<sub>29</sub>), 3.28 – 3.20 (m, 1H, H<sub>21b</sub>), 2.46 (ddt,  $J$  = 13.3, 10.0, 4.9 Hz, 1H, H<sub>24</sub>), 2.36 (dd,  $J$  = 11.8, 5.5 Hz, 1H, H<sub>28a</sub>), 2.17 (p,  $J$  = 7.2 Hz, 1H, H<sub>10</sub>), 2.06 (td,  $J$  = 14.2, 3.9 Hz, 2H, H<sub>25a</sub>, H<sub>26a</sub>), 2.01 (s, 1H, H<sub>4</sub>), 1.96 – 1.86 (m, 2H, H<sub>6</sub>, H<sub>13a</sub>), 1.86 – 1.68 (m, 4H, H<sub>2</sub>, H<sub>12</sub>, H<sub>19a</sub>), 1.53 (d,  $J$  = 14.2 Hz, 2H, H<sub>7</sub>, H<sub>8a</sub>), 1.47 – 1.10 (m, 17H, H<sub>1</sub>, H<sub>8b</sub>, H<sub>12b</sub>, H<sub>19b</sub>, H<sub>25b</sub>, H<sub>26b</sub>, H<sub>28b</sub>, H<sub>30</sub>), 1.10 (s, 3H, H<sub>15</sub>), 0.90 (dt,  $J$  = 21.0, 6.5 Hz, 9H, H<sub>17</sub>, H<sub>18</sub>, H<sub>20</sub>), 0.72 (d,  $J$  = 7.1 Hz, 3H, H<sub>16</sub>). <sup>13</sup>C NMR (150 MHz, CDCl<sub>3</sub>)  $\delta$  171.0 (C), 155.0 (C), 120.5 (C), 79.4 (C), 76.8 (CH), 71.8 (CH), 71.5 (CH), 63.8 (CH<sub>2</sub>), 61.5 (CH<sub>2</sub>), 52.9 (CH), 51.2 (CH), 48.0 (CH), 47.7 (CH), 46.1 (C), 42.2 (C), 42.0 (CH), 40.9 (CH), 40.5 (CH<sub>2</sub>), 39.1 (CH<sub>2</sub>), 36.7 (CH<sub>2</sub>), 35.8 (CH<sub>2</sub>), 33.2 (CH<sub>2</sub>), 33.1 (CH<sub>2</sub>), 30.0 (CH), 29.4 (CH<sub>2</sub>), 28.8 (CH<sub>2</sub>), 28.4 (3  $\times$  CH<sub>3</sub>), 25.8 (CH<sub>2</sub>), 21.0 (CH<sub>3</sub>), 14.9 (CH<sub>3</sub>), 14.4 (CH<sub>3</sub>), 11.6 (CH<sub>3</sub>), 10.6 (CH<sub>3</sub>). IR (ATR-FTIR), cm<sup>-1</sup>: 2927 (w), 2360 (s), 2341 (m), 1698 (w), 1508 (w), 1169 (w), 772 (w). HRMS-ESI ( $m/z$ ): [M + H]<sup>+</sup> calcd for [C<sub>35</sub>H<sub>60</sub>NO<sub>8</sub>S]<sup>+</sup> 654.4040; found 654.4034. [ $\alpha$ ]<sub>D</sub><sup>20</sup> = –35.0 ( $c$  = 0.025, CHCl<sub>3</sub>).

Synthesis of the lefamulin derivative **45**.

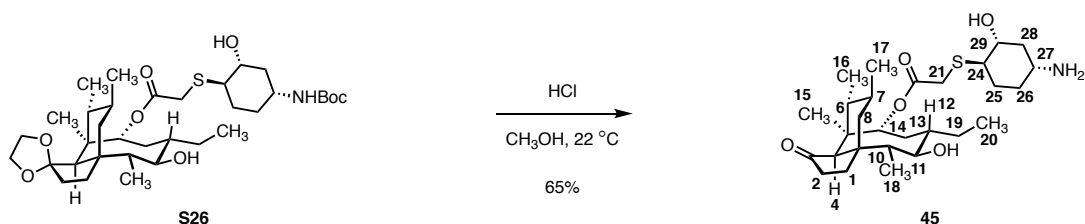

Aqueous hydrochloric acid solution (12 N, 1.60  $\mu\text{L}$ , 18.6  $\mu\text{mol}$ , 20.0 equiv) was added to a solution of the sulfide **S26** (610  $\mu\text{g}$ , 0.93  $\mu\text{mol}$ , 1 equiv) in methanol (200  $\mu\text{L}$ ) at 22  $^\circ\text{C}$ . The reaction mixture was stirred for 72 h at 22  $^\circ\text{C}$ . The product mixture was concentrated to provide the lefamulin derivative **45** as a white solid (310  $\mu\text{g}$ , 65%). The product obtained in this way was judged to be of >95% purity (600 MHz  $^1\text{H}$  NMR analysis) and was used in susceptibility testing without further purification.

$R_f = 0.04$  (90% ethyl acetate–hexanes; PAA).  $^1\text{H}$  NMR (600 MHz,  $\text{CD}_3\text{OD}$ )  $\delta$  5.45 (d,  $J = 7.6$  Hz, 1H, H<sub>14</sub>), 3.72 (s, 1H, NH), 3.58 – 3.51 (m, 2H, H<sub>21a</sub>, H<sub>29</sub>), 3.44 – 3.34 (m, 2H, H<sub>11</sub>, H<sub>21b</sub>), 3.24 – 3.18 (m, 1H, H<sub>27</sub>), 2.71 (td,  $J = 10.0, 9.3, 3.7$  Hz, 1H, H<sub>24</sub>), 2.31 – 2.25 (m, 3H, H<sub>2a</sub>, H<sub>4</sub>, H<sub>28a</sub>), 2.21 (td,  $J = 11.1, 10.3, 4.6$  Hz, 2H, H<sub>10</sub>, H<sub>25a</sub>), 2.14 (dd,  $J = 19.1, 9.4$  Hz, 1H, H<sub>2b</sub>), 2.03 (d,  $J = 8.3$  Hz, 1H, H<sub>26a</sub>), 1.95 – 1.79 (m, 2H, H<sub>13a</sub>, H<sub>19a</sub>), 1.78 (dd,  $J = 14.8, 3.1$  Hz, 1H, H<sub>8a</sub>), 1.70 (qd,  $J = 12.0, 8.8$  Hz, 2H, H<sub>1a</sub>, H<sub>12</sub>), 1.57 (dp,  $J = 16.3, 5.5, 5.0$  Hz, 1H, H<sub>7</sub>), 1.52 – 1.40 (m, 8H, H<sub>1b</sub>, H<sub>15</sub>, H<sub>13b</sub>, H<sub>25b</sub>, H<sub>26b</sub>, H<sub>28b</sub>), 1.36 – 1.22 (m, 2H, H<sub>6</sub>, H<sub>19b</sub>), 1.00 (d,  $J = 7.0$  Hz, 3H, H<sub>18</sub>), 0.92 – 0.85 (m, 6H, H<sub>17</sub>, H<sub>20</sub>), 0.83 (d,  $J = 7.3$  Hz, 4H, H<sub>8b</sub>, H<sub>16</sub>).  $^{13}\text{C}$  NMR (150 MHz,  $\text{CD}_3\text{OD}$ )  $\delta$  218.3 (C), 170.9 (C), 74.8 (CH), 71.6 (CH), 70.8 (CH), 57.9 (CH), 49.8 (CH), 48.1 (CH), 47.4 (CH), 45.2 (C), 43.2 (CH), 42.1 (CH), 41.8 (C), 40.3 (CH<sub>2</sub>), 37.9 (CH<sub>2</sub>), 36.0 (CH<sub>2</sub>), 33.7 (CH<sub>2</sub>), 33.3 (CH<sub>2</sub>), 30.1 (CH), 29.2 (CH<sub>2</sub>), 27.6 (CH<sub>2</sub>), 25.3 (CH<sub>2</sub>), 24.9 (CH<sub>2</sub>), 19.6 (CH<sub>3</sub>), 14.7 (CH<sub>3</sub>), 13.5 (CH<sub>3</sub>), 10.4 (CH<sub>3</sub>), 9.5 (CH<sub>3</sub>). IR (ATR-FTIR),  $\text{cm}^{-1}$ : 3361 (w), 2925 (m), 2360 (s), 2341 (m), 1718 (m), 1456 (w), 1285 (w), 1019 (w), 669 (w). HRMS-ESI ( $m/z$ ):  $[\text{M} + \text{H}]^+$  calcd for  $[\text{C}_{28}\text{H}_{48}\text{NO}_5\text{S}]^+$  510.3253; found 510.3248.  $[\alpha]_D^{20} = +33.8$  ( $c = 0.045$ ,  $\text{CH}_3\text{OH}$ ).

Synthesis of the propargylic alcohol **S27**.

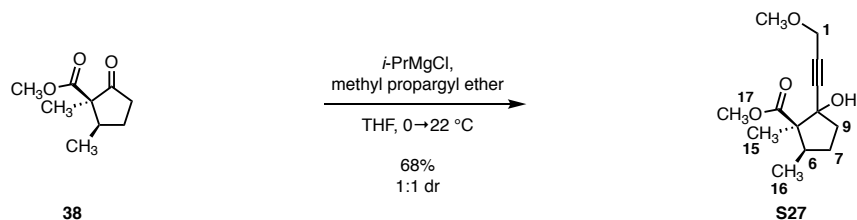

A solution of *iso*-propyl magnesium chloride in tetrahydrofuran (2.0 M, 136 mL, 272 mmol, 1.30 equiv) was added dropwise to a solution of methyl propargyl ether (23.0 mL, 272 mmol, 1.30 equiv) in tetrahydrofuran (280 mL) at  $0^\circ\text{C}$ . The reaction mixture was stirred for 20 min at  $0^\circ\text{C}$ . The resulting mixture was then added to a solution of the  $\beta$ -ketoester **38** [35.6 g, 209 mmol, 1 equiv; dried by azeotropic distillation from benzene ( $1 \times 50$  mL)] in tetrahydrofuran (420 mL) at  $0^\circ\text{C}$ . The reaction mixture was warmed to  $22^\circ\text{C}$  and stirred for 2 h at  $22^\circ\text{C}$ . The product mixture was diluted sequentially with saturated aqueous ammonium chloride solution (600 mL) and ethyl acetate (600 mL). The resulting biphasic mixture was transferred to a separatory funnel and the layers that formed were separated. The aqueous layer was extracted with ethyl acetate ( $3 \times 300$  mL). The organic layers were combined and the combined organic layers were washed with saturated aqueous sodium chloride solution (500 mL). The washed organic layer was dried over magnesium sulfate. The dried solution was filtered and the filtrate was concentrated. The residue obtained was purified by flash-column chromatography (eluting with 20% ethyl acetate–hexanes, grading to 50% ethyl acetate–hexanes, three steps) to provide the propargylic alcohol **S27** as a pale yellow oil (34.2 g, 68%).

$^1\text{H}$  NMR analysis (500 MHz) of the unpurified product mixture indicated the presence of a 1:1 mixture of diastereomers.

### Synthesis of the bicyclic ketone **46**.

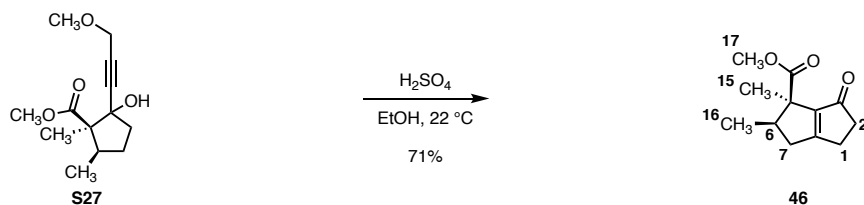

Concentrated sulfuric acid solution (18 N, 6.40 mL, 119 mmol, 11.3 equiv) was added dropwise over 2 min to a solution of the propargylic alcohol **S27** (2.54 g, 11.0 mmol, 1 equiv) in ethanol (6.4 mL) at  $22\text{ }^\circ\text{C}$ . The reaction mixture was stirred at  $22\text{ }^\circ\text{C}$  for 20 min. The product mixture was cooled to  $0\text{ }^\circ\text{C}$  and the cooled product mixture was diluted sequentially with ether (10 mL) and water (10 mL). The resulting biphasic mixture was transferred to a separatory funnel and the layers that formed were separated. The aqueous layer was extracted with ether ( $3 \times 30\text{ mL}$ ). The organic layers were combined and the combined organic layers were washed with saturated aqueous sodium chloride solution (50 mL). The washed organic layer was dried over magnesium sulfate. The dried solution was filtered and the filtrate was concentrated. The residue obtained was purified by flash-column chromatography (eluting with 10% ethyl acetate–hexanes initially, grading to 40% ethyl acetate–hexanes, three steps) to provide the bicyclic ketone **46** as a pale orange solid (1.56 g, 71%).

$R_f = 0.25$  (60% ethyl acetate–hexanes, UV).  $^1\text{H NMR}$  (600 MHz,  $\text{CDCl}_3$ )  $\delta$  3.65 (s, 3H,  $\text{H}_{17}$ ), 2.79 – 2.50 (m, 6H,  $\text{H}_1$ ,  $\text{H}_2$ ,  $\text{H}_6$ ,  $\text{H}_{7a}$ ), 2.31 (dd,  $J = 17.6, 8.3\text{ Hz}$ , 1H,  $\text{H}_{7b}$ ), 1.43 (s, 3H,  $\text{H}_{15}$ ), 1.05 (d,  $J = 7.0\text{ Hz}$ , 3H,  $\text{H}_{16}$ ).  $^{13}\text{C NMR}$  (150 MHz,  $\text{CDCl}_3$ )  $\delta$  202.6 (C), 186.5 (C), 173.9 (C), 150.3 (C), 53.2 (C), 51.9 ( $\text{CH}_3$ ), 51.6 (CH), 40.6 ( $\text{CH}_2$ ), 39.1 ( $\text{CH}_2$ ), 25.9 ( $\text{CH}_2$ ), 21.2 ( $\text{CH}_3$ ), 15.6 ( $\text{CH}_3$ ). IR (ATR-FTIR),  $\text{cm}^{-1}$ : 2957 (w), 2361 (w), 2338 (w), 1733 (m), 1696 (s), 1231 (w). HRMS-ESI ( $m/z$ ):  $[\text{M} + \text{H}]^+$  calcd for  $[\text{C}_{12}\text{H}_{17}\text{O}_3]^+$  209.1178; found 209.1172.  $[\alpha]_D^{20} = +75.6$  ( $c = 0.795$ ,  $\text{CHCl}_3$ ).



### Synthesis of the carboxylic acid **S28**.

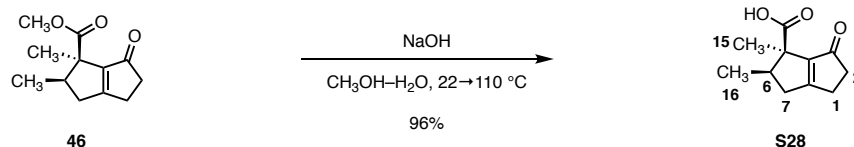

Aqueous sodium hydroxide solution (2 N, 890 mL, 1.78 mol, 20.0 equiv) was added to a solution of the methyl ester **46** (18.5 g, 88.8 mmol, 1 equiv) in methanol (890 mL) at 22 °C. The reaction vessel was equipped with a reflux condenser and then placed in an oil bath that had been preheated to 110 °C. The reaction mixture was stirred for 15 h at 110 °C. The product mixture was cooled to 22 °C over 10 min. The cooled product mixture was diluted sequentially with water (600 mL) and ether (500 mL). The resulting biphasic mixture was transferred to a separatory funnel and the layers that formed were separated. The aqueous layer was washed with ether (2 × 500 mL, discarded). The washed aqueous layer was cooled to 0 °C over 10 min. The pH of the cooled aqueous layer was adjusted to ~1 by dropwise addition of 12 N concentrated hydrochloric acid solution over 20 min at 0 °C. The acidified aqueous phase was diluted with ether (500 mL) and the resulting biphasic mixture was transferred to a separatory funnel. The layers that formed were separated. The aqueous layer was extracted with ether (2 × 500 mL). The organic layers were combined and the combined organic layers were dried over sodium sulfate. The dried solution was filtered and the filtrate was concentrated to provide the carboxylic acid **S28** as a yellow foam (16.5 g, 96%). The product so obtained was judged to be of >95% purity (400 MHz <sup>1</sup>H NMR analysis) and was used without further purification.

R<sub>f</sub> = 0.12 (1% acetic acid–50% ethyl acetate–hexanes; UV). <sup>1</sup>H NMR (400 MHz, C<sub>6</sub>D<sub>6</sub>) δ 2.73 – 2.67 (m, 2H, H<sub>2</sub>), 2.66 – 2.58 (m, 2H, H<sub>6</sub>, H<sub>7a</sub>), 2.58 – 2.52 (m, 2H, H<sub>1</sub>), 2.35 (q, *J* = 6.7 Hz, 1H, H<sub>7b</sub>), 1.41 (s, 3H, H<sub>15</sub>), 1.14 (d, *J* = 6.7 Hz, 3H, H<sub>16</sub>). <sup>13</sup>C NMR (100 MHz, C<sub>6</sub>D<sub>6</sub>) δ 203.2 (C), 187.8 (C), 179.0 (C), 149.7 (C), 52.9 (C), 51.4 (CH), 40.4 (CH<sub>2</sub>), 38.9 (CH<sub>2</sub>), 25.9 (CH<sub>2</sub>), 20.6 (CH<sub>3</sub>), 15.2 (CH<sub>3</sub>). IR (ATR-FTIR), cm<sup>-1</sup>: 2919 (w), 1692 (s), 1631 (m), 1232 (w). HRMS-ESI (m/z): calcd for [C<sub>11</sub>H<sub>15</sub>O<sub>3</sub>]<sup>+</sup> 195.1021; found 195.1016. [α]<sub>D</sub><sup>20</sup> = +56.2 (*c* = 0.930, CHCl<sub>3</sub>).

### Synthesis of the $\alpha$ -diazoketone **S29**.

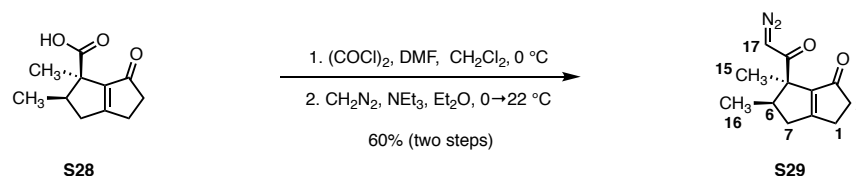

Oxalyl chloride (1.16 mL, 13.6 mmol, 1.10 equiv) was added dropwise over 5 min to a solution of the carboxylic acid **S28** [2.40 g, 12.4 mmol, 1 equiv; dried by azeotropic distillation with benzene (3 × 10 mL)] and *N,N*-dimethylformamide (1.90 mL, 24.7 mmol, 2.00 equiv) in dichloromethane (21 mL) at 0 °C. The reaction mixture was stirred for 2 h at 0 °C. The product mixture was concentrated. The residue obtained was dissolved in dichloromethane (20 mL) and the resulting solution was eluted over a plug of silica gel (5.0 cm × 5.0 cm). The silica gel plug was washed with 50% ether–hexanes (100 mL). The filtrates were combined and the combined filtrates were concentrated. The residue obtained was used directly in the following step.

A solution of the unpurified acid chloride obtained in the preceding step (nominally 12.4 mmol, 1 equiv) in ether (25 mL) was added dropwise over 20 min to a solution of diazomethane in ether (ca. 0.66 M, 130 mL, 7.00 equiv) and triethylamine (5.16 mL, 37.1 mmol, 3.00 equiv) at 0 °C. The reaction mixture was stirred for 1 h at 0 °C. The cooling bath was removed and the reaction mixture was allowed to warm to 22 °C over 1 h. The reaction mixture was stirred for 12 h at 22 °C. The product mixture was cooled to 0 °C over 20 min. The cooled product mixture was slowly diluted with aqueous potassium phosphate buffer solution (pH 7, 100 mL). The resulting biphasic mixture was stirred for 2 h at 0 °C. The stirred biphasic mixture was transferred to a separatory funnel and the layers that formed were separated. The aqueous layer was extracted with ether (3 × 150 mL). The organic layers were combined and the combined organic layers were washed sequentially with water (200 mL) and saturated aqueous sodium chloride solution (200 mL). The washed organic layer was dried over magnesium sulfate. The dried solution was filtered, and the filtrate was concentrated. The residue obtained was purified by flash-column chromatography (eluting with 30% ethyl acetate–hexanes initially, grading to 80% ethyl acetate–hexanes, four steps) to provide the  $\alpha$ -diazoketone **S29** as a yellow solid (1.90 g, 60% over two steps).

$R_f$  = 0.32 (66% ethyl acetate–hexanes; UV). <sup>1</sup>H NMR (600 MHz, CDCl<sub>3</sub>)  $\delta$  5.38 (s, 1H, H<sub>17</sub>), 2.74 – 2.70 (m, 2H, H<sub>2</sub>), 2.67 (dd,  $J$  = 17.9, 7.8 Hz, 1H, H<sub>7a</sub>), 2.62 – 2.58 (m, 2H, H<sub>1</sub>), 2.57 (d,  $J$  = 7.6 Hz, 1H, H<sub>6</sub>), 2.35 (ddtd,  $J$  = 17.9, 8.3, 1.8, 0.8 Hz, 1H, H<sub>7b</sub>), 1.40 (s, 3H, H<sub>15</sub>), 1.11 (d,  $J$  = 7.1 Hz, 3H, H<sub>16</sub>). <sup>13</sup>C NMR (150 MHz, CDCl<sub>3</sub>)  $\delta$  202.8 (C), 195.6 (C), 188.1 (C), 150.7 (C), 57.0 (C), 54.5 (CH), 51.8 (CH), 40.7 (CH<sub>2</sub>), 39.3 (CH<sub>2</sub>), 26.1 (CH<sub>2</sub>), 21.1 (CH<sub>3</sub>), 15.5 (CH<sub>3</sub>). IR (ATR-FTIR), cm<sup>-1</sup>: 2929 (w), 2130 (s), 1691 (s), 1631 (m), 1351 (s). HRMS-ESI (m/z): [M + H]<sup>+</sup> calcd for [C<sub>12</sub>H<sub>15</sub>N<sub>2</sub>O<sub>2</sub>]<sup>+</sup> 219.1134; found 219.1128. [ $\alpha$ ]<sub>D</sub><sup>20</sup> = –12.5 ( $c$  = 0.290, CHCl<sub>3</sub>).

Synthesis of the Arndt–Eistert homologation products **S30** and **S31**.

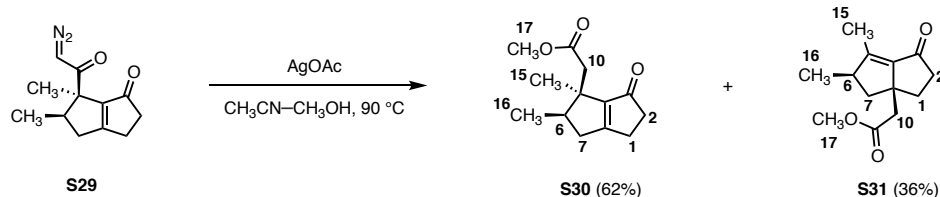

A solution of the  $\alpha$ -diazoketone **S29** (1.37 g, 6.28 mmol, 1 equiv) in acetonitrile (64 mL) was added rapidly over 1 min via additional funnel to a suspension of silver acetate (314 mg, 1.88 mmol, 0.30 equiv) in methanol (35 mL) and acetonitrile (250 mL) that had been preheated to 85 °C. The reaction mixture was stirred for 1 h at 85 °C. The product mixture was cooled to 22 °C over 10 min. The cooled product mixture was filtered over a pad of Celite. The Celite pad was rinsed with ethyl acetate (2  $\times$  200 mL). The filtrates were combined and the combined filtrates were concentrated. The residue obtained was purified by flash-column chromatography (eluting with 10% ethyl acetate–hexanes initially, grading to 30% ether–hexanes, four steps) to provide separately the homologation product **S30** (pale yellow oil, 800 mg, 62%) and the rearranged ester **S31** (pale yellow oil, 495 mg, 36%).

The relative stereochemistry of **S31** was established by X-ray analysis of the methylation product **S35** (see page S167).

**S30**:  $R_f$ : 0.52 (60% ether–hexanes; UV).  $^1\text{H}$  NMR (400 MHz,  $\text{CDCl}_3$ )  $\delta$  3.59 (s, 3H,  $\text{H}_{17}$ ), 2.70 – 2.61 (m, 2H,  $\text{H}_7$ ), 2.61 – 2.42 (m, 4H,  $\text{H}_1$ ,  $\text{H}_{2a}$ ,  $\text{H}_6$ ), 2.36 (q,  $J = 13.6$  Hz, 2H,  $\text{H}_{10}$ ), 2.21 (dd,  $J = 17.1$ , 8.1 Hz, 1H,  $\text{H}_{2b}$ ), 1.31 (s, 3H,  $\text{H}_{15}$ ), 1.06 (d,  $J = 6.9$  Hz, 3H,  $\text{H}_{16}$ ).  $^{13}\text{C}$  NMR (100 MHz,  $\text{CDCl}_3$ )  $\delta$  203.4 (C), 184.3 (C), 172.8 (C), 152.5 (C), 51.7 ( $\text{CH}_3$ ), 50.3 (CH), 44.8 (C), 40.7 ( $\text{CH}_2$ ), 39.2 ( $\text{CH}_2$ ), 38.5 ( $\text{CH}_2$ ), 25.9 ( $\text{CH}_2$ ), 24.1 ( $\text{CH}_3$ ), 14.1 ( $\text{CH}_3$ ). IR (ATR-FTIR),  $\text{cm}^{-1}$ : 2955 (w), 1732 (m), 1691 (s), 1635 (w), 1436 (w), 1376 (w), 1319 (w), 1195 (w), 1165 (w), 1091 (w), 1013 (w), 970 (w). HRMS-ESI ( $m/z$ ):  $[\text{M} + \text{H}]^+$  calcd for  $[\text{C}_{13}\text{H}_{19}\text{O}_3]^+$  223.1334; found 223.1329.  $[\alpha]_D^{20} = -12.3$  ( $c = 3.25$ ,  $\text{CHCl}_3$ ).

**S31**:  $R_f$ : 0.72 (60% ether–hexanes; UV).  $^1\text{H}$  NMR (400 MHz,  $\text{CDCl}_3$ )  $\delta$  3.68 (s, 3H,  $\text{H}_{17}$ ), 2.89 (p,  $J = 7.8$  Hz, 1H,  $\text{H}_6$ ), 2.62 – 2.38 (m, 4H,  $\text{H}_1$ ,  $\text{H}_2$ ), 2.34 (dd,  $J = 12.6$ , 7.9 Hz, 1H,  $\text{H}_{10a}$ ), 2.17 (dd,  $J = 13.8$ , 9.4 Hz, 1H,  $\text{H}_{7a}$ ), 2.04 – 1.94 (m, 4H,  $\text{H}_{7b}$ ,  $\text{H}_{15}$ ), 1.65 (td,  $J = 12.2$ , 8.4 Hz, 1H,  $\text{H}_{10b}$ ), 1.22 (d,  $J = 7.4$  Hz, 3H,  $\text{H}_{16}$ ).  $^{13}\text{C}$  NMR (100 MHz,  $\text{CDCl}_3$ )  $\delta$  203.0 (C), 172.4 (C), 154.4 (C), 143.2 (C), 54.3 (C), 51.6 ( $\text{CH}_3$ ), 49.8 (CH), 44.5 ( $\text{CH}_2$ ), 43.2 ( $\text{CH}_2$ ), 40.8 ( $\text{CH}_2$ ), 34.3 ( $\text{CH}_2$ ), 20.0 ( $\text{CH}_3$ ), 13.7 ( $\text{CH}_3$ ). IR (ATR-FTIR),  $\text{cm}^{-1}$ : 2957 (w), 1734 (s), 1708 (s), 1655 (m), 1436 (w), 1260 (w), 1201 (w), 1167 (w), 1093 (w), 1009 (w), 773 (w). HRMS-ESI ( $m/z$ ):  $[\text{M} + \text{H}]^+$  calcd for  $[\text{C}_{13}\text{H}_{19}\text{O}_3]^+$  223.1334; found 223.1329.  $[\alpha]_D^{20} = -8.92$  ( $c = 0.935$ ,  $\text{CHCl}_3$ ).

### Synthesis of the nitrile **S32**.

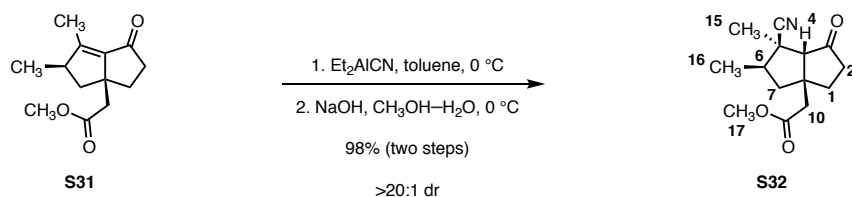

**CAUTION:** Cyanide hazard! Perform reaction, aqueous workup, and purification in a well-ventilated fume hood. All glassware and waste solutions should be washed with bleach prior to removing from fume hood.

A solution of diethylaluminum cyanide solution in toluene (1.0 M, 8.7 mL, 8.69 mmol, 1.40 equiv) was added dropwise over 2 min to a solution of the enone **S31** (1.50 g, 6.40 mmol, 1 equiv) in toluene (62 mL) at 0 °C. The reaction mixture was stirred for 20 min at 0 °C. The product mixture was diluted with saturated aqueous potassium sodium tartrate solution (60 mL). The resulting biphasic mixture was stirred vigorously for 2 h at 22 °C. The stirred biphasic mixture was transferred to a separatory funnel and the layers that formed were separated. The aqueous layer was extracted with ether (3 × 80 mL). The organic layers were combined and the combined organic layers were washed with saturated aqueous sodium chloride solution (100 mL). The washed organic layer was dried over magnesium sulfate. The dried solution was filtered and the filtrate was concentrated. The residue obtained was used directly in the following step.

Aqueous sodium hydroxide solution (0.1 N, 7.7 mL) was added dropwise over 1 min to a solution of the nitrile **18** obtained in the preceding step (nominally 6.40 mmol, 1 equiv) in methanol (65 mL) at 0 °C. The reaction mixture was stirred for 1 h at 0 °C. The product mixture was diluted sequentially with ether (100 mL) and saturated aqueous ammonium chloride solution (100 mL). The resulting biphasic solution was transferred to a separatory funnel and the layers that formed were separated. The aqueous layer was extracted with ether (3 × 100 mL). The organic layers were combined and the combined organic layers were washed with saturated aqueous sodium chloride solution (200 mL). The washed organic layer was dried over magnesium sulfate. The dried solution was filtered and the filtrate was concentrated. The residue obtained was purified by flash-column chromatography (eluting with 25% ether–hexanes) to provide the nitrile **S32** as a pale yellow oil (1.51 g, 98% over two steps).

<sup>1</sup>H NMR analysis (500 MHz) of the unpurified product mixture indicated that the product **S32** had been formed as a >20:1 mixture of diastereomers. The relative stereochemistry of the nitrile **S32** was established by X-ray analysis of the methylation product **S35** (see page S167).

R<sub>f</sub> = 0.61 (60% ether–hexanes; PAA). <sup>1</sup>H NMR (500 MHz, CDCl<sub>3</sub>) δ 3.69 (s, 3H, H<sub>17</sub>), 2.80 (d, *J* = 15.8 Hz, 1H, H<sub>10a</sub>), 2.75 (s, 1H, H<sub>4</sub>), 2.68 (d, *J* = 15.9 Hz, 1H, H<sub>10b</sub>), 2.42 (dddd, *J* = 18.6, 9.5, 6.2, 1.7 Hz, 1H, H<sub>2a</sub>), 2.25 (ddd, *J* = 18.5, 10.1, 8.1, 1H, H<sub>2b</sub>), 2.11 – 2.02 (m, 2H, H<sub>1a</sub>, H<sub>7a</sub>), 1.96, ddd, *J* = 13.7, 10.1, 6.2 Hz, 1H, H<sub>1b</sub>), 1.86 (t, *J* = 13.0 Hz, 1H, H<sub>7b</sub>), 1.77 (dp, *J* = 12.8, 6.3 Hz, 1H, H<sub>6</sub>), 1.41 (s, 3H, H<sub>15</sub>), 1.17 (d, *J* = 6.3 Hz, 3H, H<sub>16</sub>). <sup>13</sup>C NMR (125 MHz, CDCl<sub>3</sub>) δ 215.4 (C), 171.7 (C), 122.3 (C), 63.4 (CH), 51.7 (CH<sub>3</sub>), 48.0 (CH<sub>2</sub>), 47.3 (C), 46.9 (C), 45.8 (CH<sub>2</sub>), 44.5 (CH), 39.6 (CH<sub>2</sub>), 34.0 (CH<sub>2</sub>), 19.2 (CH<sub>3</sub>), 14.6 (CH<sub>3</sub>). IR (ATR-FTIR), cm<sup>-1</sup>: 2961 (w), 2360 (w), 2338

(w), 1734 (s), 1456 (w), 1218 (w), 1174 (w), 773 (w). HRMS-ESI (m/z): [M + H]<sup>+</sup> calcd for [C<sub>14</sub>H<sub>20</sub>NO<sub>3</sub>]<sup>+</sup> 250.1443; found 250.1438. [α]<sub>D</sub><sup>20</sup> = +10.9 (c = 0.455, CHCl<sub>3</sub>).

### Synthesis of the ketal **S33**.

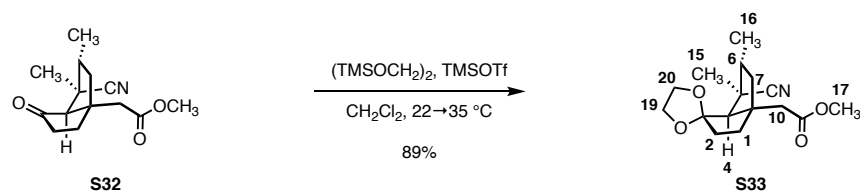

Trimethylsilyl trifluoromethanesulfonate (2.18 mL, 12.0 mmol, 2.00 equiv) was added rapidly to a solution of 1,2-bis(trimethylsiloxy)ethane (5.79 mL, 30.1 mmol, 5.00 equiv) and the nitrile **S32** [1.50 g, 6.02 mmol, 1 equiv; dried by azeotropic distillation from benzene (3 × 5.0 mL)] in dichloromethane (30 mL) at 22 °C. The reaction vessel was placed in an oil bath that had been preheated to 35 °C. The reaction mixture was stirred for 4 d at 35 °C. The product mixture was cooled to 22 °C over 20 min. The cooled product mixture was diluted with ether (20 mL). The diluted mixture was slowly poured into saturated aqueous sodium bicarbonate solution (60 mL) that had been precooled to 0 °C. The resulting biphasic mixture was transferred to a separatory funnel and the layers that formed were separated. The aqueous layer was extracted with ether (3 × 50 mL). The organic layers were combined and the combined organic layers were washed with saturated aqueous sodium chloride solution (70 mL). The washed organic layer was dried over magnesium sulfate. The dried solution was filtered and the filtrate was concentrated. The residue obtained was purified by flash-column chromatography (eluting with 15% ether–hexanes initially, grading to 30% ether–hexanes, three steps) to provide the ketal **S33** as a pale yellow oil (1.56 g, 89%).

$R_f = 0.69$  (60% ether–hexanes; PAA).  $^1\text{H NMR}$  (400 MHz,  $\text{CDCl}_3$ )  $\delta$  4.00 – 3.84 (m, 4H,  $\text{H}_{19}$ ,  $\text{H}_{20}$ ), 3.66 (s, 3H,  $\text{H}_{18}$ ), 2.63 (d,  $J = 3.5$  Hz, 2H,  $\text{H}_{10}$ ), 2.54 (s, 1H,  $\text{H}_4$ ), 2.39 – 2.23 (m, 1H,  $\text{H}_6$ ), 2.02 (dt,  $J = 7.8, 2.0$  Hz, 1H,  $\text{H}_{2a}$ ), 1.95 (dd,  $J = 13.6, 6.4$  Hz, 1H,  $\text{H}_{7a}$ ), 1.69 (dt,  $J = 7.7, 2.2$  Hz, 1H,  $\text{H}_{2b}$ ), 1.61 (dd,  $J = 13.5, 12.5$  Hz, 1H,  $\text{H}_{7b}$ ), 1.57 – 1.51 (m, 2H,  $\text{H}_1$ ), 1.46 (s, 3H,  $\text{H}_{15}$ ), 1.08 (d,  $J = 6.6$  Hz, 3H,  $\text{H}_{16}$ ).  $^{13}\text{C NMR}$  (150 MHz,  $\text{CDCl}_3$ )  $\delta$  172.3 (C), 124.0 (C), 118.2 (C), 63.9 ( $\text{CH}_2$ ), 63.9 ( $\text{CH}_2$ ), 61.9 (CH), 51.6 ( $\text{CH}_3$ ), 47.4 (C), 46.6 (C), 46.1 ( $\text{CH}_2$ ), 45.9 ( $\text{CH}_2$ ), 41.9 (CH), 35.6 ( $\text{CH}_2$ ), 35.5 ( $\text{CH}_2$ ), 17.4 ( $\text{CH}_3$ ), 14.5 ( $\text{CH}_3$ ). IR (ATR-FTIR),  $\text{cm}^{-1}$ : 2961 (w), 2364 (w), 1736 (s), 1439 (w), 1310 (w), 1259 (w), 1168 (s), 1117 (s), 1079 (w), 1029 (s), 956 (w). HRMS-ESI ( $m/z$ ):  $[\text{M} + \text{H}]^+$  calcd for  $[\text{C}_{16}\text{H}_{24}\text{NO}_4]^+$  294.1705; found 294.1700.  $[\alpha]_D^{20} = -67.8$  ( $c = 0.235$ ,  $\text{CHCl}_3$ ).

Synthesis of the methylation products **S34** and **S35**.

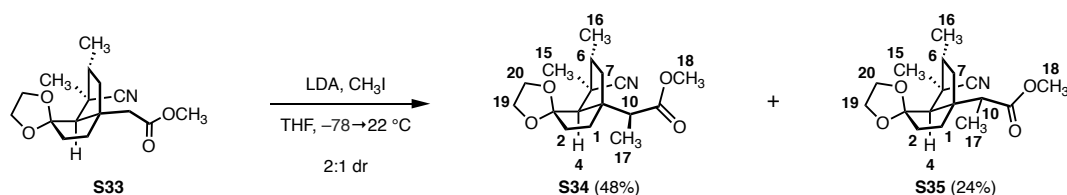

A solution of lithium diisopropylamide in tetrahydrofuran (1.3 M, 660  $\mu\text{L}$ , 825  $\mu\text{mol}$ , 2.20 equiv) was added to the solution of the ketal **S33** [110 mg, 375  $\mu\text{mol}$ , 1 equiv; dried by azeotropic distillation from benzene ( $3 \times 5.0 \text{ mL}$ )] in tetrahydrofuran (1.2 mL) at  $-78 \text{ }^\circ\text{C}$ . The reaction mixture was stirred for 30 min at  $-78 \text{ }^\circ\text{C}$ . The reaction mixture was warmed to  $0 \text{ }^\circ\text{C}$  over 10 min and stirred for an additional 3 h at  $0 \text{ }^\circ\text{C}$ . The reaction mixture was cooled to  $-78 \text{ }^\circ\text{C}$  over 30 min. Iodomethane (70.0  $\mu\text{L}$ , 1.13 mmol, 3.00 equiv) was added dropwise over 2 min to the cooled reaction mixture. The reaction mixture was stirred for 1 h at  $-78 \text{ }^\circ\text{C}$ . The cooling bath was removed, and the reaction mixture was allowed to warm to  $22 \text{ }^\circ\text{C}$  over 2 h. The warmed reaction mixture was stirred for 15 h at  $22 \text{ }^\circ\text{C}$ . The product mixture was diluted sequentially with ether (5.0 mL) and saturated aqueous ammonium chloride solution (5.0 mL). The resulting biphasic mixture was stirred for 15 min at  $22 \text{ }^\circ\text{C}$ . The stirred biphasic mixture was transferred to a separatory funnel and the layers that formed were separated. The aqueous layer was extracted with ether ( $3 \times 5.0 \text{ mL}$ ). The organic layers were combined and the combined organic layers were washed sequentially with water (6.0 mL) and saturated aqueous sodium chloride solution (6.0 mL). The washed organic layer was dried over magnesium sulfate. The dried solution was filtered and the filtrate was concentrated. The residue obtained was purified by flash-column chromatography (eluting with 5% ether–hexanes initially, grading to 30% ether–hexanes, six steps) to provide separately the (10*S*) methylation product **S34** (white solid, 55.0 mg, 48%) and the (10*R*) methylation product **S35** (white solid, 28.0 mg, 24%).

$^1\text{H}$  NMR analysis (500 MHz) of the unpurified product mixture indicated the presence of a 2:1 mixture of **S34** and **S35**. The relative stereochemistry of the minor product **S35** was established by X-ray analysis (see page S167).

**S34**:  $R_f = 0.61$  (60% ether–hexanes; CAM).  $^1\text{H}$  NMR (600 MHz,  $\text{CDCl}_3$ )  $\delta$  4.03 – 3.93 (m, 1H,  $\text{H}_{19\text{a}}$  or  $\text{H}_{20\text{a}}$ ), 3.88 (dddd,  $J = 10.9, 7.8, 5.6, 3.1 \text{ Hz}$ , 3H,  $\text{H}_{19\text{a}}$  or  $\text{H}_{20\text{a}}$ ,  $\text{H}_{19\text{b}}$ ,  $\text{H}_{20\text{b}}$ ), 3.86 (s, 3H,  $\text{H}_{18}$ ), 2.79 (q,  $J = 7.2 \text{ Hz}$ , 1H,  $\text{H}_{10}$ ), 2.68 (s, 1H,  $\text{H}_4$ ), 2.34 – 2.25 (m, 2H,  $\text{H}_{1\text{a}}$ ,  $\text{H}_6$ ), 1.76 (dd,  $J = 13.4, 6.5 \text{ Hz}$ , 1H,  $\text{H}_{7\text{a}}$ ), 1.69 (ddd,  $J = 12.5, 7.0, 3.2 \text{ Hz}$ , 1H,  $\text{H}_{2\text{a}}$ ), 1.63 (d,  $J = 12.9 \text{ Hz}$ , 1H,  $\text{H}_{7\text{b}}$ ), 1.54 (dt,  $J = 12.3, 6.0 \text{ Hz}$ , 1H,  $\text{H}_{2\text{b}}$ ), 1.47 (s, 3H,  $\text{H}_{15}$ ), 1.45 – 1.37 (m, 1H,  $\text{H}_{1\text{b}}$ ), 1.21 (d,  $J = 7.2 \text{ Hz}$ , 3H,  $\text{H}_{17}$ ), 1.06 (d,  $J = 6.6 \text{ Hz}$ , 3H,  $\text{H}_{16}$ ).  $^{13}\text{C}$  NMR (150 MHz,  $\text{CDCl}_3$ )  $\delta$  175.6 (C), 123.9 (C), 118.2 (C), 63.9 ( $\text{CH}_2$ ), 63.5 ( $\text{CH}_2$ ), 58.9 (CH), 51.5 ( $\text{CH}_3$ ), 51.2 (C), 48.8 (CH), 46.2 ( $\text{CH}_2$ ), 46.1 (C), 41.3 (CH), 36.9 ( $\text{CH}_2$ ), 33.3 ( $\text{CH}_2$ ), 17.7 ( $\text{CH}_3$ ), 14.4 ( $\text{CH}_3$ ), 14.2 ( $\text{CH}_3$ ). IR (ATR-FTIR),  $\text{cm}^{-1}$ : 2959 (m), 2360 (s), 2341 (m), 669 (w). HRMS-ESI ( $m/z$ ):  $[\text{M} + \text{H}]^+$  calcd for  $[\text{C}_{17}\text{H}_{26}\text{NO}_4]^+$  308.1862; found 308.1856.  $[\alpha]_{\text{D}}^{20} = -19.52$  ( $c = 1.031$ ,  $\text{CHCl}_3$ ).

**S35**:  $R_f = 0.59$  (60% ether–hexanes; PAA).  $^1\text{H}$  NMR (600 MHz,  $\text{CDCl}_3$ )  $\delta$  3.97 – 3.90 (m, 1H,  $\text{H}_{19\text{a}}$  or  $\text{H}_{20\text{a}}$ ), 3.91 – 3.83 (m, 3H,  $\text{H}_{19\text{a}}$  or  $\text{H}_{20\text{a}}$ ,  $\text{H}_{19\text{b}}$ ,  $\text{H}_{20\text{b}}$ ), 3.69 (s, 3H,  $\text{H}_{18}$ ), 2.98 (s, 1H,  $\text{H}_4$ ), 2.75 (q,  $J = 6.9 \text{ Hz}$ , 1H,  $\text{H}_{10}$ ), 2.30 (dt,  $J = 12.8, 6.4 \text{ Hz}$ , 1H,  $\text{H}_6$ ), 2.16 – 2.09 (m, 1H,  $\text{H}_{1\text{a}}$ ), 1.76 (dd,  $J = 13.3$ ,

6.3 Hz, 1H, H<sub>7a</sub>), 1.67 – 1.52 (m, 2H, H<sub>2a</sub>, H<sub>7b</sub>), 1.49 (s, 3H, H<sub>15</sub>), 1.39 – 1.27 (m, 2H, H<sub>1b</sub>, H<sub>2b</sub>), 1.19 (d,  $J = 6.9$  Hz, 3H, H<sub>17</sub>), 1.09 (d,  $J = 6.5$  Hz, 3H, H<sub>16</sub>). <sup>13</sup>C NMR (150 MHz, CDCl<sub>3</sub>)  $\delta$  175.8 (C), 123.9 (C), 118.1 (C), 63.8 (CH<sub>2</sub>), 63.6 (CH<sub>2</sub>), 58.7 (CH), 51.9 (C), 51.5 (CH<sub>3</sub>), 47.6 (CH), 46.3 (CH<sub>2</sub>), 46.1 (C), 41.0 (CH), 36.1 (CH<sub>2</sub>), 32.3 (CH<sub>2</sub>), 17.5 (CH<sub>3</sub>), 14.3 (CH<sub>3</sub>), 13.2 (CH<sub>3</sub>). IR (ATR-FTIR), cm<sup>-1</sup>: 2960 (m), 1732 (s), 1167 (m). HRMS-ESI (m/z): [M + H]<sup>+</sup> calcd for [C<sub>17</sub>H<sub>26</sub>NO<sub>4</sub>]<sup>+</sup> 308.1862; found 308.1856.  $[\alpha]_D^{20} = -68.1$  ( $c = 1.582$ , CHCl<sub>3</sub>).



### Synthesis of the aldehyde **S36**.

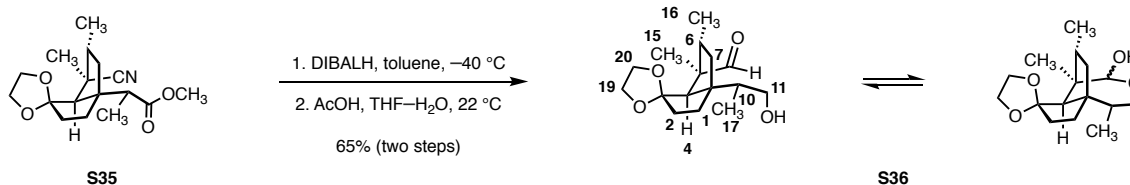

A solution of diisobutylaluminum hydride solution in toluene (1.0 M, 146  $\mu\text{L}$ , 244  $\mu\text{mol}$ , 3.00 equiv) was added over 10 s to a solution of the nitrile **S35** [15.0 mg, 48.8  $\mu\text{mol}$ , 1 equiv; dried by azeotropic distillation with benzene ( $3 \times 1.0 \text{ mL}$ )] in toluene (330  $\mu\text{L}$ ) at  $-40 \text{ } ^\circ\text{C}$ . The reaction mixture was stirred for 15 min at  $-40 \text{ } ^\circ\text{C}$ . The product mixture was diluted sequentially with ethyl acetate (1.0 mL) and saturated aqueous potassium sodium tartrate solution (1.0 mL). The resulting biphasic mixture was stirred vigorously for 2 h at  $22 \text{ } ^\circ\text{C}$ . The stirred biphasic mixture was transferred to a separatory funnel and the layers that formed were separated. The aqueous layer was extracted with ethyl acetate ( $2 \times 2.0 \text{ mL}$ ). The organic layers were combined and the combined organic layers were washed with saturated aqueous sodium chloride solution (2.0 mL). The washed organic layer was dried over magnesium sulfate. The dried solution was filtered and the filtrate was concentrated. The residue obtained was used directly in the following step.

Acetic acid (14.0  $\mu\text{L}$ , 244  $\mu\text{mol}$ , 5.00 equiv) was added to a solution of the unpurified product obtained in the preceding step (nominally 48.8  $\mu\text{mol}$ , 1 equiv) in 4:1 tetrahydrofuran–water (v/v, 18 mL) at  $22 \text{ } ^\circ\text{C}$ . The reaction mixture was stirred for 1 h at  $22 \text{ } ^\circ\text{C}$ . The product mixture was diluted sequentially with ethyl acetate (1.0 mL) and saturated aqueous sodium bicarbonate solution (1.0 mL). The resulting biphasic mixture was transferred to a borosilicate test tube and the layers that formed were separated. The aqueous layer was extracted with ethyl acetate ( $3 \times 1.0 \text{ mL}$ ). The organic layers were combined and the combined organic layers were washed with saturated aqueous sodium chloride solution (2.0 mL). The washed organic layer was dried over magnesium sulfate. The dried solution was filtered and the filtrate was concentrated to provide the aldehyde **S36** as a colorless oil (9.00 mg, 65% over two steps). The product **S36** was formed as a 2.6:1 mixture of hydroxyaldehyde and hemiketal isomers (600 MHz  $^1\text{H}$  NMR analysis). The product **S36** was determined to be >95% pure by quantitative  $^1\text{H}$  NMR analysis (600 MHz) and was used directly in the following step.

$R_f = 0.31$  (60% ethyl acetate–hexanes; PAA).  $^1\text{H}$  NMR (600 MHz,  $\text{C}_6\text{D}_6$ , hydroxyaldehyde only)  $\delta$  9.44 (s, 1H,  $\text{H}_{14}$ ), 3.64 (dd,  $J = 10.9, 4.5 \text{ Hz}$ , 1H,  $\text{H}_{11a}$ ), 3.46 – 3.40 (m, 1H,  $\text{H}_{19a}$  or  $20a$ ), 3.39 – 3.27 (m, 4H,  $\text{H}_{11b}$ ,  $\text{H}_{19a}$  or  $20a$ ,  $\text{H}_{19b}$ ,  $\text{H}_{20b}$ ), 3.00 (s, 1H,  $\text{H}_4$ ), 2.10 – 1.87 (m, 2H,  $\text{H}_{1a}$ ,  $\text{H}_6$ ), 1.86 – 1.77 (m, 1H,  $\text{H}_{10}$ ), 1.63 – 1.51 (m, 2H,  $\text{H}_2$ ), 1.51 – 1.35 (m, 1H,  $\text{H}_{7a}$ ), 1.25 (s, 3H,  $\text{H}_{15}$ ), 1.22–1.13 (m, 2H,  $\text{H}_{1b}$ ,  $\text{H}_{7b}$ ), 0.97 (d,  $J = 6.8 \text{ Hz}$ , 3H,  $\text{H}_{17}$ ), 0.87 (d,  $J = 7.1 \text{ Hz}$ , 3H,  $\text{H}_{16}$ ).  $^{13}\text{C}$  NMR (150 MHz,  $\text{C}_6\text{D}_6$ )  $\delta$  204.1 (CH), 119.2 (C), 65.5 ( $\text{CH}_2$ ), 63.9 ( $\text{CH}_2$ ), 62.6 ( $\text{CH}_2$ ), 57.7 (C), 53.5 (CH), 52.6 (C), 47.7 ( $\text{CH}_2$ ), 44.8 (CH), 42.3 (CH), 36.4 ( $\text{CH}_2$ ), 32.9 ( $\text{CH}_2$ ), 15.0 ( $\text{CH}_3$ ), 13.2 ( $\text{CH}_3$ ), 13.1 ( $\text{CH}_3$ ). IR (ATR-FTIR),  $\text{cm}^{-1}$ : 3423 (w), 2957 (s), 2878 (m), 2360 (m), 2336 (m), 1717 (m), 1458 (w), 1117 (s), 1027 (s). HRMS-ESI (m/z):  $[\text{M} + \text{H}]^+$  calcd for  $[\text{C}_{16}\text{H}_{27}\text{O}_4]^+$  283.1909; found 283.1903.  $[\alpha]_D^{20} = -84.3$  ( $c = 0.075$ ,  $\text{CHCl}_3$ ).

### Synthesis of the homopropargylic alcohol **S37**.

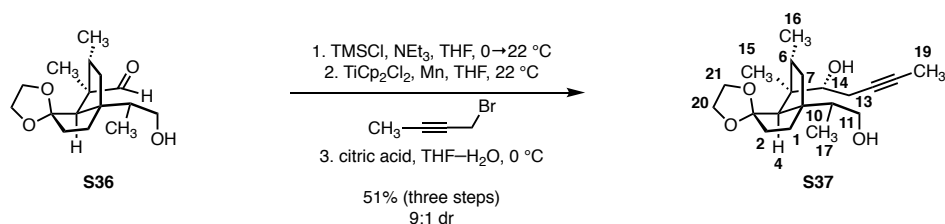

Trimethylsilyl chloride (4.00  $\mu$ L, 35.1  $\mu$ mol, 1.10 equiv) was added dropwise over 1 min to a solution of triethylamine (18.0  $\mu$ L, 128  $\mu$ mol, 4.00 equiv) and the aldehyde **S36** (9.00 mg, 31.9  $\mu$ mol, 1 equiv) in tetrahydrofuran (320  $\mu$ L) at 0 °C. The reaction mixture was stirred for 2 h at 0 °C. The product mixture was diluted sequentially with ether (1.0 mL) and aqueous potassium phosphate buffer solution (pH 7, 1.5 mL). The resulting biphasic mixture was transferred to a borosilicate test tube and the layers that formed were separated. The aqueous layer was extracted with ether (2  $\times$  1.0 mL). The organic layers were combined and the combined organic layers were washed with saturated aqueous sodium chloride solution (1.0 mL). The washed organic layer was dried over magnesium sulfate. The dried solution was filtered and the filtrate was concentrated. The residue obtained was used directly in the following step.

A mixture of bis(cyclopentadienyl)titanium(IV) dichloride (11.4 mg, 45.7  $\mu$ mol, 3.00 equiv) and manganese powder (10.0 mg, 19.3 mmol, 12.0 equiv) in tetrahydrofuran (190  $\mu$ L) was stirred vigorously at 22 °C until a light green color persisted (approximately 30 min). A solution of the protected alcohol obtained in the preceding step (nominally 31.9  $\mu$ mol, 1 equiv) and 1-bromobut-2-yne (8.30 mg, 53.5  $\mu$ mol, 3.50 equiv) in tetrahydrofuran (190  $\mu$ L) was added dropwise over 5 min at 22 °C. The reaction mixture was stirred for 1 h at 22 °C. The product mixture was diluted with hexanes (2.0 mL). The diluted product mixture was eluted over a plug of silica gel (1.0 cm  $\times$  1.0 cm, eluting with 30% ether–hexanes). The filtrates were combined and the combined filtrates were concentrated. The residue obtained was used directly in the following step.

Aqueous citric acid solution (10% w/v, 100  $\mu$ L) was added dropwise to a solution of the addition product obtained in the preceding step (nominally 31.9  $\mu$ mol, 1 equiv) in tetrahydrofuran (500  $\mu$ L) at 0 °C. The reaction mixture was stirred for 30 min at 0 °C. The product mixture was diluted sequentially with ethyl acetate (1.0 mL) and saturated aqueous sodium bicarbonate solution (2.0 mL). The resulting biphasic mixture was transferred to a borosilicate test tube and the layers that formed were separated. The aqueous layer was extracted with ethyl acetate (4  $\times$  2.0 mL). The organic layers were combined and the combined organic layers were washed with saturated aqueous sodium chloride solution (1.0 mL). The washed organic layer was dried over magnesium sulfate. The dried solution was filtered and the filtrate was concentrated. The residue obtained was purified by flash-column chromatography (eluting with 15% ethyl acetate–hexanes initially, grading to 30% ethyl acetate–hexanes, four steps) to provide the homopropargylic alcohol **S37** as a colorless oil (2.60 mg, 51% over 3 steps).

<sup>1</sup>H NMR analysis (400 MHz) of the unpurified product mixture indicated the presence of a 9:1 mixture of diastereomers. The relative stereochemistry of the major diastereomer was assigned by comparison of <sup>3</sup>J<sub>H–H</sub> coupling constants to the addition product **S40**.

$R_f = 0.32$  (60% ethyl acetate–hexanes; PAA).  $^1\text{H NMR}$  (400 MHz,  $\text{C}_6\text{D}_6$ )  $\delta$  3.81 (dt,  $J = 10.1, 2.4$  Hz, 1H,  $\text{H}_{14}$ ), 3.61 (dd,  $J = 11.1, 5.3$  Hz, 1H,  $\text{H}_{11a}$ ), 3.47 (dd,  $J = 11.3, 5.4$  Hz, 1H,  $\text{H}_{11b}$ ), 3.39 – 3.16 (m, 4H,  $\text{H}_{20}, \text{H}_{21}$ ), 2.63 (dt,  $J = 16.5, 2.7$  Hz, 1H,  $\text{H}_{13a}$ ), 2.57 – 2.41 (m, 2H,  $\text{H}_4, \text{H}_{13b}$ ), 2.17 (d,  $J = 2.5$  Hz, 1H, OH), 2.11 (q,  $J = 7.5$  Hz, 1H,  $\text{H}_6$ ), 1.87 (ddd,  $J = 13.1, 9.1, 7.8$  Hz, 1H,  $\text{H}_{1a}$ ), 1.79 (dt,  $J = 6.9, 5.6$  Hz, 1H,  $\text{H}_{10}$ ), 1.72 – 1.60 (m, 2H,  $\text{H}_2$ ), 1.58 – 1.50 (m, 3H,  $\text{H}_{1b}, \text{H}_7$ ), 1.46 (t,  $J = 2.5$  Hz, 3H,  $\text{H}_{19}$ ), 1.38 (s, 3H,  $\text{H}_{15}$ ), 1.22 (d,  $J = 7.3$  Hz, 3H,  $\text{H}_{17}$ ), 0.96 (d,  $J = 6.8$  Hz, 3H,  $\text{H}_{16}$ ).  $^{13}\text{C NMR}$  (125 MHz,  $\text{C}_6\text{D}_6$ )  $\delta$  119.7 (C), 78.5 (C), 77.4 (C), 73.8 (CH), 65.6 ( $\text{CH}_2$ ), 64.3 ( $\text{CH}_2$ ), 62.4 ( $\text{CH}_2$ ), 56.8 (CH), 53.8 (C), 51.2 (C), 47.2 ( $\text{CH}_2$ ), 45.3 (CH), 44.9 (CH), 35.7 ( $\text{CH}_2$ ), 32.1 ( $\text{CH}_2$ ), 25.0 ( $\text{CH}_2$ ), 16.6 ( $\text{CH}_3$ ), 16.0 ( $\text{CH}_3$ ), 13.8 ( $\text{CH}_3$ ), 3.11 ( $\text{CH}_3$ ). IR (ATR-FTIR),  $\text{cm}^{-1}$ : 3397 (w), 2918 (m), 2874 (m), 2361 (s), 2341 (s), 1027 (m). HRMS-ESI ( $m/z$ ):  $[\text{M} + \text{H}]^+$  calcd for  $[\text{C}_{20}\text{H}_{32}\text{NaO}_4]^+$  359.2198; found 359.2198.  $[\alpha]_D^{20} = -142.9$  ( $c = 0.014$ ,  $\text{CHCl}_3$ ).

*Synthesis of the aldehyde S38.*

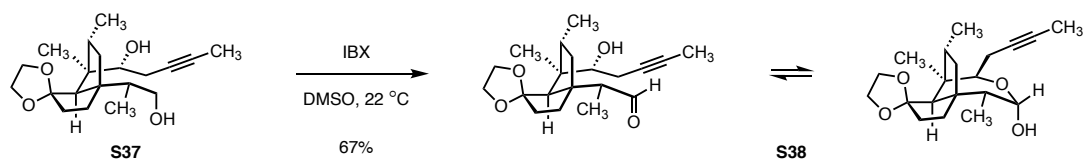

2-Iodoxybenzoic acid (1.40 mg, 4.71  $\mu\text{mol}$ , 1.05 equiv) was added in one portion to a solution of the homopropargyl alcohol **S37** (1.50 mg, 4.50  $\mu\text{mol}$ , 1 equiv) in dimethylsulfoxide (200  $\mu\text{L}$ ) at 22 °C. The reaction mixture was stirred for 3 h at 22 °C. The product mixture was diluted sequentially with ether (2.0 mL), saturated aqueous sodium bicarbonate solution (1.0 mL), and saturated aqueous sodium thiosulfate solution (1.0 mL). The resulting biphasic mixture was stirred vigorously for 30 min at 22 °C. The stirred biphasic mixture was transferred to a borosilicate test tube and the layers that formed were separated. The aqueous layer was extracted with ether (3  $\times$  2.0 mL). The organic layers were combined and the combined organic layers were washed with saturated aqueous sodium chloride solution (2.0 mL). The washed organic layer was dried over magnesium sulfate. The dried solution was filtered and the filtrate was concentrated. The residue obtained was purified by flash-column chromatography (eluting with 5% ethyl acetate–hexanes initially, grading to 20% ethyl acetate–hexanes, three steps) to provide the aldehyde **S38** as a white foam (1.00 mg, 67%).

$^1\text{H}$  NMR analysis (500 MHz) of the purified product mixture indicated the presence of a 1:1 mixture of hydroxyaldehyde and hemiketal isomers.

### Synthesis of the aldehyde **S39**.

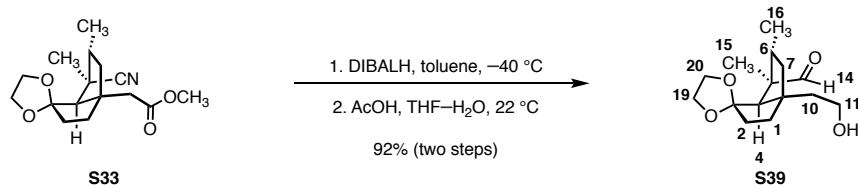

A solution of diisobutylaluminum hydride solution in toluene (1.0 M, 3.3 mL, 3.26 mmol, 4.00 equiv) was added over 10 s to a solution of the nitrile **S33** [239 mg, 815  $\mu\text{mol}$ , 1 equiv; dried by azeotropic distillation with benzene ( $3 \times 2.0\text{ mL}$ )] in toluene (4.1 mL) at  $-40\text{ }^{\circ}\text{C}$ . The reaction mixture was stirred for 15 min at  $-40\text{ }^{\circ}\text{C}$ . The product mixture was diluted sequentially with ethyl acetate (4.0 mL) and saturated aqueous potassium sodium tartrate solution (4.0 mL). The resulting biphasic mixture was stirred vigorously for 2 h at  $22\text{ }^{\circ}\text{C}$ . The stirred biphasic mixture was transferred to a separatory funnel and the layers that formed were separated. The aqueous layer was extracted with ethyl acetate ( $2 \times 8.0\text{ mL}$ ). The organic layers were combined and the combined organic layers were washed with saturated aqueous sodium chloride solution (10 mL). The washed organic layer was dried over magnesium sulfate. The dried solution was filtered and the filtrate was concentrated. The aldehyde **S39** was determined to be  $>95\%$  pure by quantitative  $^1\text{H}$  NMR analysis (400 MHz) and was used directly in the following step.

Acetic acid (234  $\mu\text{L}$ , 4.07 mmol, 5.00 equiv) was added to a solution of the unpurified product obtained in the preceding step (nominally 815  $\mu\text{mol}$ , 1 equiv) in 4:1 tetrahydrofuran–water (v/v, 18 mL) at  $22\text{ }^{\circ}\text{C}$ . The reaction mixture was stirred for 1 h at  $22\text{ }^{\circ}\text{C}$ . The product mixture was diluted sequentially with ethyl acetate (5.0 mL) and saturated aqueous sodium bicarbonate solution (7.0 mL). The resulting biphasic mixture was transferred to a separatory funnel and the layers that formed were separated. The aqueous layer was extracted with ethyl acetate ( $3 \times 10\text{ mL}$ ). The organic layers were combined and the combined organic layers were washed with saturated aqueous sodium chloride solution (20 mL). The washed organic layer was dried over magnesium sulfate. The dried solution was filtered and the filtrate was concentrated to provide the aldehyde **S39** as a colorless oil (200 mg, 92% over two steps). The purity of the aldehyde **S39** was determined to be  $>95\%$  by  $^1\text{H}$  NMR analysis (400 MHz).

$R_f = 0.41$  (70% ethyl acetate–hexanes; PAA).  $^1\text{H}$  NMR (400 MHz,  $\text{C}_6\text{D}_6$ )  $\delta$  9.44 (s, 1H, H<sub>14</sub>), 3.53 (td,  $J = 7.3, 1.9\text{ Hz}$ , 2H, H<sub>11</sub>), 3.47 – 3.28 (m, 4H, H<sub>19</sub>, H<sub>20</sub>), 2.69 (s, 1H, H<sub>4</sub>), 2.09 (dp,  $J = 13.8, 7.0\text{ Hz}$ , 1H, H<sub>6</sub>), 1.90 – 1.74 (m, 3H, H<sub>1a</sub>, H<sub>10</sub>), 1.71 – 1.48 (m, 2H, H<sub>2</sub>), 1.44 (dd,  $J = 12.9, 6.4\text{ Hz}$ , 1H, H<sub>1b</sub>), 1.36 – 1.13 (m, 5H, H<sub>7</sub>, H<sub>15</sub>), 0.87 (d,  $J = 7.2\text{ Hz}$ , 3H, H<sub>16</sub>).  $^{13}\text{C}$  NMR (100 MHz,  $\text{C}_6\text{D}_6$ )  $\delta$  205.1 (CH), 119.2 (C), 64.1 (CH<sub>2</sub>), 63.3 (CH<sub>2</sub>), 60.5 (CH<sub>2</sub>), 57.7 (C), 57.5 (CH), 48.7 (C), 47.1 (CH<sub>2</sub>), 44.7 (CH<sub>2</sub>), 43.4 (CH), 36.3 (CH<sub>2</sub>), 35.6 (CH<sub>2</sub>), 14.9 (CH<sub>3</sub>), 13.4 (CH<sub>3</sub>). IR (ATR-FTIR),  $\text{cm}^{-1}$ : 3406 (w), 2956 (m), 2936 (m), 2879 (m), 2359 (w), 2342 (w), 1717 (s), 1456 (w), 1353 (w), 1320 (w), 1260 (w), 1182 (w), 1116 (m), 1032 (s), 949 (w). HRMS-ESI (m/z):  $[\text{M} + \text{H}]^+$  calcd for  $[\text{C}_{15}\text{H}_{25}\text{O}_4]^+$  269.1753; found 269.1747.  $[\alpha]_D^{20} = -53.7$  ( $c = 1.000$ ,  $\text{CHCl}_3$ ).

### Synthesis of the homopropargylic alcohol **S40**.

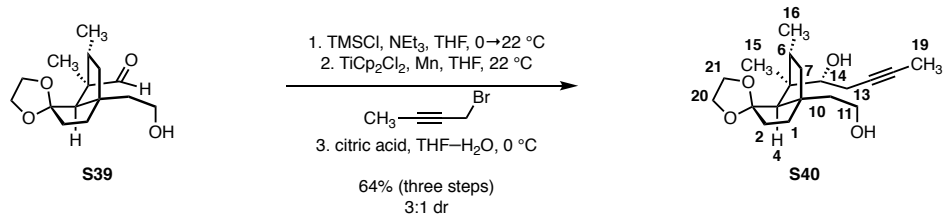

Trimethylsilyl chloride (230  $\mu$ L, 1.19 mmol, 1.10 equiv) was added dropwise over 1 min to a solution of triethylamine (688  $\mu$ L, 4.95 mmol, 2.00 equiv) and the aldehyde **S39** (442 mg, 1.65 mmol, 1 equiv) in tetrahydrofuran (16 mL) at 0 °C. The reaction mixture was stirred for 2 h at 0 °C. The product mixture was diluted sequentially with ether (10 mL) and aqueous potassium phosphate buffer solution (pH 7, 15 mL). The resulting biphasic mixture was transferred to a separatory funnel and the layers that formed were separated. The aqueous layer was extracted with ether (2  $\times$  10 mL). The organic layers were combined and the combined organic layers were washed with saturated aqueous sodium chloride solution (10 mL). The washed organic layer was dried over magnesium sulfate. The dried solution was filtered and the filtrate was concentrated. The residue obtained was used directly in the following step.

A mixture of bis(cyclopentadienyl)titanium(IV) dichloride (1.21 g, 4.84 mmol, 3.00 equiv) and manganese powder (1.06 g, 19.3 mmol, 12.0 equiv) in tetrahydrofuran (20 mL) was stirred vigorously at 22 °C until a light green color persisted (approximately 30 min). A solution of the unpurified product obtained in the preceding step (nominally 1.65 mmol, 1 equiv) and 1-bromobut-2-yne (752 mg, 5.65 mmol, 3.50 equiv) in tetrahydrofuran (20 mL) was added dropwise over 40 min at 22 °C via syringe pump. The reaction mixture was stirred for 2 h at 22 °C. The product mixture was diluted with hexanes (40 mL). The diluted product mixture was eluted over a plug of silica gel (4.0 cm  $\times$  4.0 cm, eluting with 30% ether–hexanes). The filtrates were combined and the combined filtrates were concentrated. The residue obtained was used directly in the following step.

Aqueous citric acid solution (10% w/v, 9.0 mL) was added dropwise to a solution of the addition product obtained in the preceding step (nominally 1.65 mmol, 1 equiv) in tetrahydrofuran (20 mL) at 0 °C. The reaction mixture was stirred for 30 min at 0 °C. The product mixture was diluted sequentially with ethyl acetate (10 mL) and saturated aqueous sodium bicarbonate solution (20 mL). The resulting biphasic mixture was transferred to a separatory funnel and the layers that formed were separated. The aqueous layer was extracted with ethyl acetate (4  $\times$  20 mL). The organic layers were combined and the combined organic layers were washed with saturated aqueous sodium chloride solution (50 mL). The washed organic layer was dried over magnesium sulfate. The dried solution was filtered and the filtrate was concentrated. The residue obtained was purified by flash-column chromatography (eluting with 15% ethyl acetate–hexanes initially, grading to 30% ethyl acetate–hexanes, four steps) to provide the homopropargylic alcohol **S40** as an off-white foam (340 mg, 64% over three steps).

<sup>1</sup>H NMR analysis (500 MHz) of the unpurified product mixture indicated the presence of a 3:1 mixture of diastereomers. The relative stereochemistry of major diastereomer was established by NOE analysis of **48**.

$R_f = 0.25$  (30% ethyl acetate–hexanes; PAA).  $^1\text{H}$  NMR (600 MHz,  $\text{C}_6\text{D}_6$ )  $\delta$  3.78 (dd,  $J = 10.3, 2.7$  Hz, 1H,  $\text{H}_{14}$ ), 3.53 (t,  $J = 7.2$  Hz, 2H,  $\text{H}_{11}$ ), 3.44 – 3.29 (m, 4H,  $\text{H}_{20}, \text{H}_{21}$ ), 2.57 (dt,  $J = 16.4, 2.7$  Hz, 1H,  $\text{H}_{13a}$ ), 2.47 (ddd,  $J = 16.5, 10.1, 2.7$  Hz, 1H,  $\text{H}_{13b}$ ), 2.12 (p,  $J = 7.3$  Hz, 1H,  $\text{H}_6$ ), 2.03 (s, 1H,  $\text{H}_4$ ), 1.89 (dt,  $J = 13.4, 6.7$  Hz, 1H,  $\text{H}_{10a}$ ), 1.71 (td,  $J = 15.2, 7.7$  Hz, 2H,  $\text{H}_{1a}, \text{H}_{2a}$ ), 1.63 (tt,  $J = 13.5, 6.8$  Hz, 1H,  $\text{H}_{10b}$ ), 1.57 (dd,  $J = 6.7, 4.3$  Hz, 1H,  $\text{H}_{2b}$ ), 1.55 (d,  $J = 6.5$  Hz, 1H,  $\text{H}_{7a}$ ), 1.49 – 1.43 (m, 4H,  $\text{H}_{7b}, \text{H}_{19}$ ), 1.34 (s, 3H,  $\text{H}_{15}$ ), 1.29 (dd,  $J = 11.7, 6.7$  Hz, 1H,  $\text{H}_{1b}$ ), 1.20 (d,  $J = 7.3$  Hz, 3H,  $\text{H}_{16}$ ).  $^{13}\text{C}$  NMR (150 MHz,  $\text{C}_6\text{D}_6$ )  $\delta$  119.4 (C), 78.5 (C), 77.6 (C), 74.3 (CH), 64.4 ( $\text{CH}_2$ ), 62.8 ( $\text{CH}_2$ ), 60.7 (CH), 60.4 ( $\text{CH}_2$ ), 50.8 (C), 49.7 (C), 46.5 ( $\text{CH}_2$ ), 46.5 ( $\text{CH}_2$ ), 45.7 (CH), 35.8 ( $\text{CH}_2$ ), 35.5 ( $\text{CH}_2$ ), 25.1 ( $\text{CH}_2$ ), 16.5 ( $\text{CH}_3$ ), 16.2 ( $\text{CH}_3$ ), 3.3 ( $\text{CH}_3$ ). IR (ATR-FTIR),  $\text{cm}^{-1}$ , 3429 (w), 2925 (s), 2879 (m), 2360 (m), 2336 (w), 1456 (w), 1336 (w), 1222 (w), 1112 (m), 1027 (s), 949 (w). HRMS-ESI ( $m/z$ ):  $[\text{M} + \text{H}]^+$  calcd for  $[\text{C}_{19}\text{H}_{31}\text{O}_4]^+$  323.2222; found 323.2217.  $[\alpha]_D^{20} = -5.58$  ( $c = 0.165$ ,  $\text{CHCl}_3$ ).



Synthesis of the aldehyde **47**.

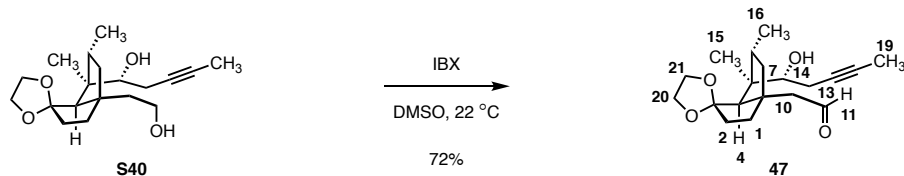

2-Iodoxybenzoic acid (351 mg, 1.19 mmol, 1.01 equiv) was added in one portion to a solution of the homopropargylic alcohol **S40** (380 mg, 1.18 mmol, 1 equiv) in dimethylsulfoxide (15 mL) at 22 °C. The reaction mixture was stirred for 3 h at 22 °C. The product mixture was diluted sequentially with ether (20 mL), saturated aqueous sodium bicarbonate solution (10 mL), and saturated aqueous sodium thiosulfate solution (10 mL). The resulting biphasic mixture was stirred vigorously for 30 min at 22 °C. The stirred biphasic mixture was transferred to a separatory funnel and the layers that formed were separated. The aqueous layer was extracted with ether (3 × 20 mL). The organic layers were combined and the combined organic layers were washed with saturated aqueous sodium chloride solution (50 mL). The washed organic layer was dried over magnesium sulfate. The dried solution was filtered, and the filtrate was concentrated. The residue obtained was purified by flash-column chromatography (eluting with 5% ethyl acetate–hexanes initially, grading to 20% ethyl acetate–hexanes, three steps) to provide the hydroxyaldehyde **47** as a white foam (274 mg, 72%). The product **47** was used immediately in the following step.

$R_f = 0.43$  (33% ether–hexanes; PAA).  $^1\text{H NMR}$  (600 MHz,  $\text{C}_6\text{D}_6$ )  $\delta$  9.50 (d,  $J = 2.2$  Hz, 1H,  $\text{H}_{11}$ ), 3.64 (dd,  $J = 10.1, 2.7$  Hz, 1H,  $\text{H}_{14}$ ), 3.43 – 3.26 (m, 4H,  $\text{H}_{20}, \text{H}_{21}$ ), 2.59 – 2.53 (m, 1H,  $\text{H}_{10a}$ ), 2.52 – 2.45 (m, 1H,  $\text{H}_{13a}$ ), 2.43 – 2.33 (m, 1H,  $\text{H}_{13b}$ ), 2.25 (dd,  $J = 15.9, 2.1$  Hz, 1H,  $\text{H}_{10b}$ ), 2.12 (s, 1H, OH), 2.03 (p,  $J = 7.3, 6.8$  Hz, 1H,  $\text{H}_6$ ), 1.87 (s, 1H,  $\text{H}_4$ ), 1.78 – 1.73 (m, 1H,  $\text{H}_{7a}$ ), 1.70 – 1.58 (m, 2H,  $\text{H}_{1a}, \text{H}_{2a}$ ), 1.56 – 1.40 (m, 6H,  $\text{H}_{1b}, \text{H}_{2b}, \text{H}_{7b}, \text{H}_{19}$ ), 1.29 – 1.22 (m, 3H,  $\text{H}_{15}$ ), 1.08 (d,  $J = 7.1$  Hz, 3H,  $\text{H}_{16}$ ).  $^{13}\text{C NMR}$  (150 MHz,  $\text{C}_6\text{D}_6$ )  $\delta$  201.3 (CH), 118.9 (C), 78.6 (C), 77.4 (C), 74.5 (CH), 64.6 ( $\text{CH}_2$ ), 62.8 ( $\text{CH}_2$ ), 60.8 (CH), 57.6 ( $\text{CH}_2$ ), 50.5 (C), 48.5 (C), 46.6 ( $\text{CH}_2$ ), 45.8 (CH), 36.5 ( $\text{CH}_2$ ), 35.8 ( $\text{CH}_2$ ), 25.1 ( $\text{CH}_2$ ), 16.6 ( $\text{CH}_3$ ), 16.4 ( $\text{CH}_3$ ), 3.2 ( $\text{CH}_3$ ). IR (ATR-FTIR),  $\text{cm}^{-1}$ : 2922.0 (w), 2359.7 (s), 2341.1 (m), 1716.8 (w), 1028.9 (w), 772.5 (w). HRMS-ESI ( $m/z$ ): calcd for  $[\text{C}_{19}\text{H}_{29}\text{O}_4]^+$  321.2066; found 321.2060.  $[\alpha]_D^{20} = -4.89$  ( $c = 0.185$ ,  $\text{CHCl}_3$ )



Synthesis of the allylic silyl ether **48**.

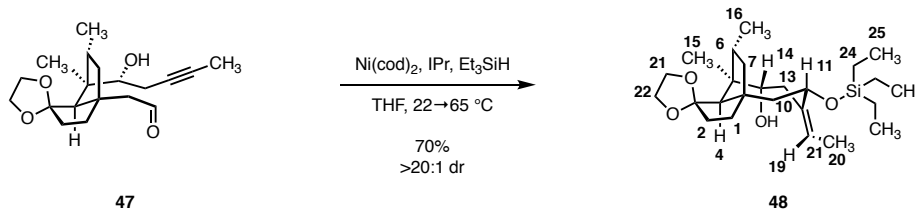

A solution of bis(cyclooctadiene)nickel(0) (23.5 mg, 85.5  $\mu\text{mol}$ , 0.20 equiv) and 1,3-bis(2,6-diisopropylphenyl)imidazol-2-ylidene (IPr, 33.2 mg, 85.5  $\mu\text{mol}$ , 0.20 equiv) in tetrahydrofuran (1.0 mL) was stirred for 30 min at 22 °C in a nitrogen-filled glovebox. The resulting mixture was added to a solution of triethylsilane (35.0 mg, 301  $\mu\text{mol}$ , 3.00 equiv) and the alkynyl aldehyde **47** (274 mg, 428  $\mu\text{mol}$ , 1 equiv) in tetrahydrofuran (14 mL) at 22 °C in a round-bottomed flask fused to a Teflon-coated valve at 22 °C in a nitrogen-filled glovebox. The reaction vessel was sealed and the sealed reaction vessel was removed from the glovebox. The reaction vessel was placed in an oil bath that had been preheated to 65 °C. The reaction mixture was stirred at 3 h at 65 °C. The product mixture was cooled to 22 °C over 20 min. The cooled product mixture was eluted over a short pad of silica gel (2.0 cm  $\times$  2.0 cm, eluting with 30% ether–hexanes). The filtrates were combined and the combined filtrates were concentrated. The residue obtained was purified by flash-column chromatography (eluting with 5% ether–hexanes initially, grading to 30% ether–hexanes, three steps) to provide the allylic silyl ether **48** as a clear oil (130 mg, 70%).

Within the limits of detection (500 MHz  $^1\text{H}$  NMR analysis), the allylic ether **48** was formed as a single diastereomer. NOE correlations between H11 and H14, and H10 and H14, support the configuration of the C11 and C14 centers, respectively, as that shown.

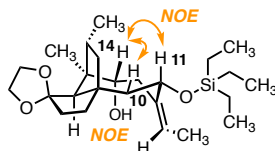

$R_f$  = 0.61 (33% ether–hexanes; PAA).  $^1\text{H}$  NMR (500 MHz,  $\text{C}_6\text{D}_6$ , 77 °C)  $\delta$  6.04 (q,  $J$  = 7.1 Hz, 1H, H<sub>19</sub>), 4.45 (dd,  $J$  = 10.6, 4.6 Hz, 1H, H<sub>14</sub>), 3.85 (d,  $J$  = 8.7 Hz, 1H, H<sub>11</sub>), 3.55 (dq,  $J$  = 18.3, 6.6, 2H, H<sub>21a</sub>, H<sub>22a</sub>), 3.43 (dq,  $J$  = 12.6, 6.8, 2H, H<sub>21b</sub>, H<sub>22b</sub>), 2.91 (dd,  $J$  = 15.7, 8.8 Hz, 1H, H<sub>10a</sub>), 2.63 (s, 1H, H<sub>4</sub>), 2.46 (dq,  $J$  = 13.3, 7.3 Hz, 1H, H<sub>6</sub>), 2.17 (dd,  $J$  = 13.2, 4.7 Hz, 1H, H<sub>13a</sub>), 2.08 (d,  $J$  = 15.6 Hz, 1H, H<sub>10b</sub>), 1.85 (dd,  $J$  = 13.2, 10.4 Hz, 1H, H<sub>13b</sub>), 1.77 – 1.47 (m, 9H, H<sub>1</sub>, H<sub>2</sub>, H<sub>7</sub>, H<sub>20</sub>), 1.30 (s, 3H, H<sub>15</sub>), 1.08 – 0.99 (m, 9H, H<sub>25</sub>), 0.95 (d,  $J$  = 7.1 Hz, 3H, H<sub>16</sub>), 0.64 (q,  $J$  = 7.6 Hz, 6H, H<sub>24</sub>).  $^{13}\text{C}$  NMR (150 MHz,  $\text{C}_6\text{D}_6$ )  $\delta$  120.3 (C), 63.6 (CH<sub>2</sub>), 63.4 (CH<sub>2</sub>), 55.4 (CH), 53.9 (CH<sub>2</sub>), 51.3 (C), 47.0 (C), 45.6 (CH<sub>2</sub>), 43.0 (C), 42.4 (CH<sub>2</sub>), 36.1 (CH<sub>2</sub>), 35.9 (CH<sub>2</sub>), 14.0 (CH<sub>3</sub>), 13.5 (CH<sub>3</sub>), 7.3 (3  $\times$  CH<sub>3</sub>), 5.3 (3  $\times$  CH<sub>2</sub>). IR (AT-FTIR),  $\text{cm}^{-1}$ : 2954 (m), 2875 (m), 2358 (w), 1040 (w). HRMS-ESI ( $m/z$ ):  $[\text{M} + \text{H}]^+$  calcd for  $[\text{C}_{25}\text{H}_{45}\text{O}_4\text{Si}]^+$  437.3087; found 437.3082.  $[\alpha]_D^{20}$  = –862.9 ( $c$  = 0.265,  $\text{CHCl}_3$ ). Note: Owing to conformational equilibria of the eight-membered ring, extensive line broadening was observed in the  $^{13}\text{C}$  NMR spectrum of **48** and the  $^{13}\text{C}$  shifts of C6, C11, C14, C19, and C21 could not be resolved.

Synthesis of the sulfonate **49**.

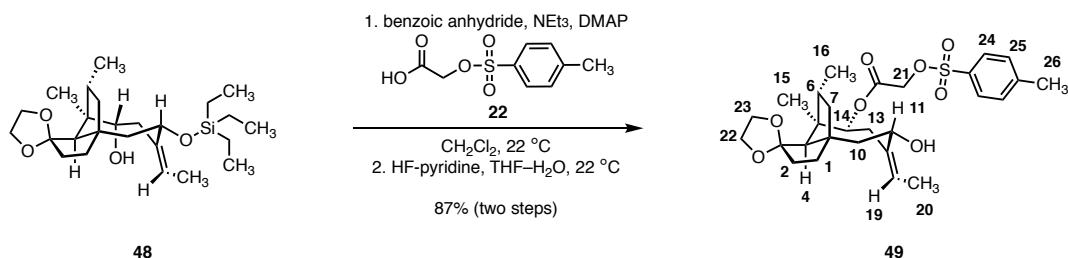

(4-Dimethylamino)pyridine (400  $\mu$ g, 3.40  $\mu$ mol, 0.10 equiv) was added to a solution of the sulfonate **22** (39.5 mg, 172  $\mu$ mol, 5.00 equiv), benzoic anhydride (38.9 mg, 172  $\mu$ mol, 5.00 equiv), triethylamine (33.0  $\mu$ L, 240  $\mu$ mol, 7.00 equiv), and the allylic ether **48** [20.0 mg, 34.3  $\mu$ mol, 1 equiv; dried by azeotropic distillation with benzene (3  $\times$  1.0 mL)] in dichloromethane (270  $\mu$ L) at 22 °C. The reaction mixture was stirred for 2 h at 22 °C. The product mixture was diluted sequentially with ether (2.0 mL) and 1 N aqueous sodium hydroxide solution (1.0 mL). The resulting biphasic mixture was transferred to a separatory funnel and the layers that formed were separated. The aqueous layer was extracted with ether (4  $\times$  2.0 mL). The organic layers were combined and the combined organic layers were washed with saturated aqueous sodium chloride solution (4.0 mL). The washed organic layer was dried over magnesium sulfate. The dried solution was filtered and the filtrate was concentrated. The residue obtained was used in directly in the following step.

Hydrogen fluoride–pyridine complex (12.0  $\mu$ L, 68.6  $\mu$ mol, 2.00 equiv) was added to a solution of the unpurified product obtained in the proceeding step (nominally 34.3  $\mu$ mol, 1 equiv) in 2:1 tetrahydrofuran–water (v/v, 690  $\mu$ L) at 22 °C. The reaction mixture was stirred for 16 h at 22 °C. The product mixture was diluted sequentially with ethyl acetate (1.0 mL) and saturated aqueous sodium bicarbonate solution (1.0 mL). The resulting biphasic mixture was transferred to a separatory funnel and the layers that formed were separated. The aqueous layer was extracted with ethyl acetate (3  $\times$  1.0 mL). The organic layers were combined and the combined organic layers were washed with saturated aqueous sodium chloride solution (2.0 mL). The washed organic layer was dried over magnesium sulfate. The dried solution was filtered and the filtrate was concentrated. The residue obtained was purified by flash-column chromatography (eluting with 10% ethyl acetate–hexanes initially, grading to 50% ethyl acetate–hexanes, three steps) to provide the sulfonate **49** as a white foam (16.0 mg, 87% over two steps).

$R_f$  = 0.35 (40% ethyl acetate–hexanes; PAA). <sup>1</sup>H NMR (500 MHz, C<sub>6</sub>D<sub>6</sub>, 77 °C)  $\delta$  7.81 (d,  $J$  = 8.3 Hz, 2H, H<sub>24</sub>), 6.65 (d,  $J$  = 8.0 Hz, 2H, H<sub>25</sub>), 5.77 (q,  $J$  = 7.0 Hz, 1H, H<sub>19</sub>), 5.35 (dd,  $J$  = 10.0, 2.2 Hz, 1H, H<sub>14</sub>), 4.39 (s, 2H, H<sub>21</sub>), 4.30 (d,  $J$  = 10.4 Hz, 1H, H<sub>11</sub>), 3.56 – 3.46 (m, 2H, H<sub>22</sub> or <sub>23</sub>), 3.40 – 3.29 (m, 2H, H<sub>22</sub> or <sub>23</sub>), 2.84 (dd,  $J$  = 16.2, 10.2 Hz, 1H, H<sub>13a</sub>), 2.59 (s, 1H, H<sub>4</sub>), 2.46 (q,  $J$  = 8.7 Hz, 1H, H<sub>6</sub>), 2.07 (dd,  $J$  = 12.9, 4.2 Hz, 1H, H<sub>10a</sub>), 1.97 (d,  $J$  = 16.2 Hz, 1H, H<sub>13b</sub>), 1.78 (s, 3H, H<sub>26</sub>), 1.59 – 1.50 (m, 2H, H<sub>1a</sub>, H<sub>10b</sub>), 1.47 – 1.36 (m, 8H, H<sub>1b</sub>, H<sub>2</sub>, H<sub>7</sub>, H<sub>20</sub>), 1.33 (s, 3H, H<sub>15</sub>), 0.79 (d,  $J$  = 7.0 Hz, 3H, H<sub>16</sub>). <sup>13</sup>C NMR (150 MHz, C<sub>6</sub>D<sub>6</sub>)  $\delta$  165.5 (C), 144.2 (C), 141.5 (C), 133.6 (C), 129.4 (2  $\times$  CH), 128.0 (2  $\times$  CH), 119.5 (C), 119.0 (CH), 75.3 (CH), 69.6 (CH), 64.6 (CH<sub>2</sub>), 63.3 (CH<sub>2</sub>), 62.9 (CH<sub>2</sub>), 54.7 (CH), 51.5 (CH<sub>2</sub>), 49.7 (C), 45.8 (C), 45.3 (CH<sub>2</sub>), 41.8 (CH), 41.4 (CH<sub>2</sub>), 35.3 (CH<sub>2</sub>), 32.6 (CH<sub>2</sub>), 20.7 (CH<sub>3</sub>), 13.1 (CH<sub>3</sub>), 12.7 (CH<sub>3</sub>). IR (AT-FTIR), cm<sup>-1</sup>: 2935 (w), 2877

(w), 1757 (w), 1372 (m), 1190 (m), 1177 (s), 1033 (m). HRMS-ESI (m/z): [M + H]<sup>+</sup> calcd for [C<sub>28</sub>H<sub>39</sub>O<sub>8</sub>S]<sup>+</sup> 535.2366; found 535.2360. [α]<sub>D</sub><sup>20</sup> = -47.3 (c = 0.119, CHCl<sub>3</sub>). Note: Owing to the conformational equilibria of the eight-membered ring, extensive line broadening was observed in the <sup>13</sup>C NMR spectrum of **49** and the <sup>13</sup>C shift of C15 could not be resolved.

Synthesis of the reduction product **50**.

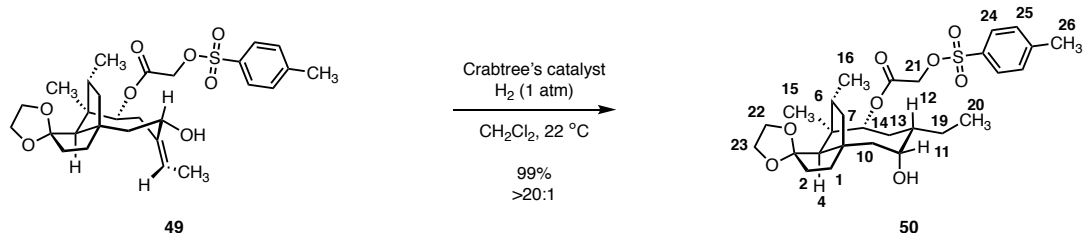

Crabtree's catalyst (600  $\mu\text{g}$ , 750 nmol, 5.0 mol%) was added to a solution of the alkene **49** [8.00 mg, 15.0  $\mu\text{mol}$ , 1 equiv; dried by azeotropic distillation with benzene ( $3 \times 1.0$  mL)] in dichloromethane (750  $\mu\text{L}$ ) at 22 °C. The reaction vessel was purged with dihydrogen and placed under a balloon of dihydrogen. The reaction mixture was stirred for 1 h at 22 °C. The product mixture was concentrated. The residue obtained was purified by flash-column chromatography (eluting with 10% ethyl acetate–hexanes initially, grading to 50% ethyl acetate–hexanes, three steps) to provide the reduction product **50** as a clear oil (8.00 mg, 99%).

Within the limits of detection (500 MHz  $^1\text{H}$  NMR analysis), the reduction product **50** was formed as a single diastereomer. The relative stereochemistry of the ethyl substituent was determined by NOE correlations between H14 and H12.

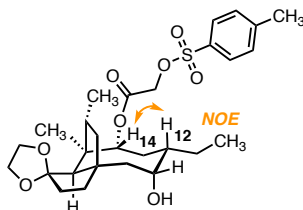

$R_f = 0.36$  (40% ethyl acetate–hexanes; PAA).  $^1\text{H}$  NMR (500 MHz,  $\text{C}_6\text{D}_6$ , 77 °C)  $\delta$  7.77 (d,  $J = 8.0$  Hz, 2H, H<sub>24</sub>), 6.74 (d,  $J = 7.9$  Hz, 2H, H<sub>25</sub>), 5.08 (d,  $J = 8.5$  Hz, 1H, H<sub>14</sub>), 4.39 (q,  $J = 15.6$  Hz, 2H, H<sub>21</sub>), 3.98 (d,  $J = 9.8$  Hz, 1H, H<sub>11</sub>), 3.57 (p,  $J = 6.4, 5.0$  Hz, 2H, H<sub>22</sub> or <sub>23</sub>), 3.46 (p,  $J = 7.8, 6.9$  Hz, 2H, H<sub>22</sub> or <sub>23</sub>), 2.59 (s, 1H, H<sub>4</sub>), 2.51 (s, 1H, H<sub>6</sub>), 2.05 – 1.76 (m, 6H, H<sub>10a</sub>, H<sub>12</sub>, H<sub>13a</sub>, H<sub>26</sub>), 1.75 – 1.48 (m, 8H, H<sub>1</sub>, H<sub>2</sub>, H<sub>7</sub>, H<sub>10b</sub>, H<sub>13b</sub>), 1.32 (s, 4H, H<sub>15</sub>, H<sub>19a</sub>), 1.17 (s, 1H, H<sub>19b</sub>), 0.85 – 0.77 (m, 6H, H<sub>16</sub>, H<sub>20</sub>).  $^{13}\text{C}$  NMR (150 MHz,  $\text{C}_6\text{D}_6$ )  $\delta$  165.5 (C), 144.1 (C), 133.7 (C), 129.4 (2  $\times$  CH), 127.9 (2  $\times$  CH), 120.1 (C), 74.7 (CH), 69.3 (CH), 64.6 (CH<sub>2</sub>), 63.4 (CH<sub>2</sub>), 62.9 (CH<sub>2</sub>), 56.8 (CH), 49.1 (C), 47.4 (CH), 45.2 (C), 43.8 (CH), 41.7 (CH<sub>2</sub>), 41.4 (CH), 35.7 (CH<sub>2</sub>), 35.7 (CH<sub>2</sub>), 34.4 (CH<sub>2</sub>), 29.8 (CH<sub>2</sub>), 23.6 (broad, CH<sub>2</sub>), 20.7 (CH<sub>3</sub>), 13.4 (CH<sub>3</sub>), 11.2 (CH<sub>3</sub>). IR (AT-FTIR),  $\text{cm}^{-1}$ : 2931 (w), 2876 (w), 2360 (m), 2340 (m), 1756 (w), 1371 (w), 1177 (s), 1042 (m). HRMS-ESI ( $m/z$ ):  $[\text{M} + \text{Na}]^+$  calcd for  $[\text{C}_{28}\text{H}_{40}\text{NaO}_8\text{S}]^+$  559.2342; found  $[\alpha]_D^{20} = +0.23$  ( $c = 0.088$ ,  $\text{CHCl}_3$ ).

### Synthesis of the sulfide **S41**.

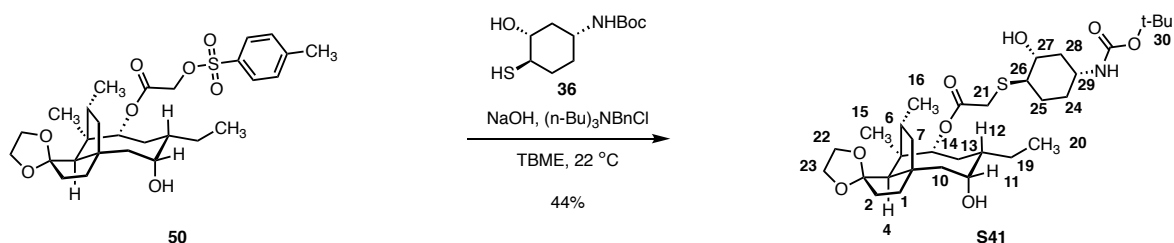

Aqueous sodium hydroxide solution (1.0 M, 5.00  $\mu$ L, 4.80  $\mu$ mol, 1.30 equiv) was added to a solution of the thiol **36** (2.40 mg, 4.80  $\mu$ mol, 1.30 equiv), benzyl tri-*n*-butylammonium chloride (230  $\mu$ g, 0.75  $\mu$ mol, 0.20 equiv), and the sulfonate **50** (2.00 mg, 3.70  $\mu$ mol, 1 equiv) in *tert*-butyl methyl ether (200  $\mu$ L) at 22 °C. The reaction mixture was stirred for 2 h at 22 °C. The product mixture was diluted sequentially with ethyl acetate (1.0 mL) and 1 N aqueous sodium hydroxide solution (1.0 mL). The resulting biphasic mixture was transferred to a separatory funnel and the layers that formed were separated. The aqueous layer was extracted with ethyl acetate (2  $\times$  1.0 mL). The organic layers were combined and the combined organic layers were washed sequentially with aqueous sodium thiosulfate solution (10% w/v, 1.0 mL), 0.1 N aqueous phosphoric acid solution (1.0 mL), saturated aqueous sodium bicarbonate solution (1.0 mL), and saturated aqueous sodium chloride solution (1.0 mL). The washed organic layer was dried over magnesium sulfate. The dried solution was filtered and the filtrate was concentrated. The residue obtained was purified by flash-column chromatography (eluting with 30% ethyl acetate–hexanes initially, grading to 80% ethyl acetate–hexanes, three steps) to provide the displacement product **S41** as a white foam (1.00 mg, 44%).

$R_f$  = 0.21 (80% ethyl acetate–hexanes; PAA). <sup>1</sup>H NMR (500 MHz, C<sub>6</sub>D<sub>6</sub>, 77 °C)  $\delta$  5.11 (d,  $J$  = 8.5 Hz, 1H, H<sub>14</sub>), 4.07 – 3.99 (m, 2H, NH, H<sub>11</sub>), 3.65 – 3.55 (m, 2H, H<sub>22</sub> or <sub>23</sub>), 3.52 – 3.37 (m, 3H, H<sub>22</sub> or <sub>23</sub>, H<sub>29</sub>), 3.22 (s, 1H, H<sub>27</sub>), 3.15 (d,  $J$  = 15.0 Hz, 1H, H<sub>21a</sub>), 3.04 (d,  $J$  = 14.9 Hz, 1H, H<sub>21b</sub>), 2.85 (s, 1H, OH), 2.67 (s, 1H, H<sub>4</sub>), 2.56 (s, 1H, H<sub>6</sub>), 2.35 (td,  $J$  = 11.0, 9.4, 3.9 Hz, 1H, H<sub>26</sub>), 2.20 (dd,  $J$  = 12.4, 2.4 Hz, 1H, H<sub>28a</sub>), 1.95 (dd,  $J$  = 14.7, 9.9 Hz, 2H, H<sub>12</sub>, H<sub>13a</sub>), 1.83 (dd,  $J$  = 13.7, 4.0 Hz, 1H, H<sub>25a</sub>), 1.79 – 1.54 (m, 12H, H<sub>1</sub>, H<sub>2</sub>, H<sub>7</sub>, H<sub>10</sub>, H<sub>13b</sub>, H<sub>19</sub>, H<sub>24a</sub>), 1.45 (s, 9H, H<sub>30</sub>), 1.38 (s, 3H, H<sub>15</sub>), 1.19 – 1.08 (m, 1H, H<sub>24b</sub>), 0.98 (q,  $J$  = 11.5 Hz, 1H, H<sub>28b</sub>), 0.93 – 0.84 (m, 6H, H<sub>16</sub>, H<sub>20</sub>), 0.76 (t,  $J$  = 12.1 Hz, 1H, H<sub>25b</sub>). <sup>13</sup>C NMR (150 MHz, C<sub>6</sub>D<sub>6</sub>)  $\delta$  170.7 (C), 154.5 (C), 120.2 (C), 78.2 (C), 74.7 (CH), 71.6 (CH), 71.6 (CH), 63.4 (CH<sub>2</sub>), 62.9 (CH<sub>2</sub>), 56.9 (CH), 52.4 (CH), 49.0 (C), 47.5 (CH<sub>2</sub>), 47.3 (CH), 45.3 (C), 44.0 (CH), 41.8 (CH<sub>2</sub>), 41.6 (CH), 40.3 (CH<sub>2</sub>), 35.7 (CH<sub>2</sub>), 34.6 (CH<sub>2</sub>), 32.5 (CH<sub>2</sub>), 32.5 (CH<sub>2</sub>), 29.8 (CH<sub>2</sub>), 28.8 (CH<sub>2</sub>), 28.1 (3  $\times$  CH<sub>3</sub>), 23.7 (CH<sub>2</sub>), 13.7 (CH<sub>3</sub>), 12.6 (CH<sub>3</sub>), 11.3 (CH<sub>3</sub>). IR (AT-FTIR), cm<sup>-1</sup>: 2935 (w), 1696 (w), 1288 (w), 1172 (w). HRMS-ESI (m/z): [M + Na]<sup>+</sup> calcd for [C<sub>32</sub>H<sub>53</sub>NNaO<sub>8</sub>S]<sup>+</sup> 634.3390; found 634.3378.  $[\alpha]_D^{20}$  = -7.74 ( $c$  = 0.031, CHCl<sub>3</sub>).

Synthesis of the lefamulin derivative **51**.

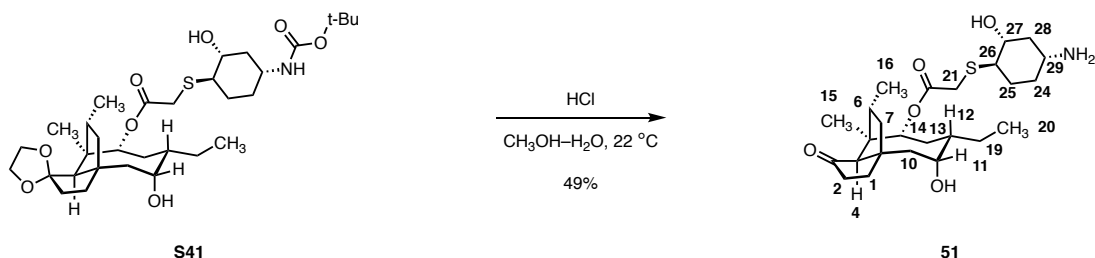

Aqueous hydrochloric acid solution (12 N, 1.50  $\mu\text{L}$ , 19.5  $\mu\text{mol}$ , 15.0 equiv) was added to a solution of the sulfide **S41** (800  $\mu\text{g}$ , 1.30  $\mu\text{mol}$ , 1 equiv) in methanol (200  $\mu\text{L}$ ) at 22  $^\circ\text{C}$ . The reaction mixture was stirred for 72 h at 22  $^\circ\text{C}$ . The product mixture was concentrated to provide the lefamulin derivative **51** as a fine, white solid (300  $\mu\text{g}$ , 49%). The product obtained in this way was judged to be of >95% purity (600 MHz  $^1\text{H}$  NMR analysis) and was used in susceptibility testing without further purification.

$R_f = 0.05$  (95% ethyl acetate–hexanes; PAA).  $^1\text{H}$  NMR (600 MHz,  $\text{CD}_3\text{OD}$ )  $\delta$  4.11 (d,  $J = 9.7$  Hz, 1H,  $\text{H}_{11}$ ), 3.61 – 3.48 (m, 3H,  $\text{H}_{21a}$ ,  $\text{H}_{27}$ , NH), 3.35 – 3.30 (m, 1H,  $\text{H}_{21b}$ ), 3.20 (s, 1H,  $\text{H}_{29}$ ), 2.91 (s, 1H,  $\text{H}_4$ ), 2.70 (s, 1H,  $\text{H}_{26}$ ), 2.49 (s, 1H, OH), 2.26 (qd,  $J = 11.1, 10.2, 7.0$  Hz, 2H,  $\text{H}_{2a}$ ,  $\text{H}_{28a}$ ), 2.16 (td,  $J = 18.3, 16.9, 6.5$  Hz, 3H,  $\text{H}_{2b}$ ,  $\text{H}_{24a}$ ,  $\text{H}_{25a}$ ), 2.02 (s, 1H,  $\text{H}_{24b}$ ), 1.91 (dd,  $J = 29.7, 10.8$  Hz, 2H,  $\text{H}_{1a}$ ,  $\text{H}_{13a}$ ), 1.73 (d,  $J = 15.4$  Hz, 1H,  $\text{H}_{10a}$ ), 1.70 – 1.62 (m, 2H,  $\text{H}_{10b}$ ,  $\text{H}_{12}$ ), 1.62 – 1.38 (m, 7H,  $\text{H}_{1b}$ ,  $\text{H}_6$ ,  $\text{H}_7$ ,  $\text{H}_{19a}$ ,  $\text{H}_{24b}$ ,  $\text{H}_{25b}$ ), 1.37 – 1.17 (m, 6H,  $\text{H}_{13b}$ ,  $\text{H}_{19b}$ ,  $\text{H}_{15}$ ,  $\text{H}_{28a}$ ), 0.90 (t,  $J = 7.4$  Hz, 3H,  $\text{H}_{20}$ ), 0.80 (d,  $J = 6.6$  Hz, 3H,  $\text{H}_{16}$ ).  $^{13}\text{C}$  NMR (150 MHz,  $\text{CD}_3\text{OD}$ )  $\delta$  222.8 (C), 171.0 (C), 75.7 (broad, CH), 71.8 (CH), 70.7 (CH), 60.8 (CH), 52.7 (C), 49.7 (CH), 48.7 ( $\text{CH}_2$ ), 47.7 (CH), 45.8 (C), 45.1 (CH), 45.1 (CH), 38.8 ( $\text{CH}_2$ ), 38.1 ( $\text{CH}_2$ ), 38.1 ( $\text{CH}_2$ ), 35.0 ( $\text{CH}_2$ ), 33.2 ( $\text{CH}_2$ ), 29.2 ( $\text{CH}_2$ ), 29.2 ( $\text{CH}_2$ ), 27.6 ( $\text{CH}_2$ ), 26.1 ( $\text{CH}_2$ ), 13.8 ( $\text{CH}_3$ ), 12.1 ( $\text{CH}_3$ ), 11.3 ( $\text{CH}_3$ ). IR (AT-FTIR),  $\text{cm}^{-1}$ : 3015 (w), 2359 (w), 2341 (w), 1412 (w), 1139 (s), 944 (s). HRMS-ESI ( $m/z$ ):  $[\text{M} + \text{H}]^+$  calcd for  $[\text{C}_{25}\text{H}_{42}\text{NO}_5\text{S}]^+$  468.2784; found 468.2774.  $[\alpha]_D^{20} = +278.7$  ( $c = 0.015$ ,  $\text{CH}_3\text{OH}$ ).

### Synthesis of the esters **S42** and **S43**.

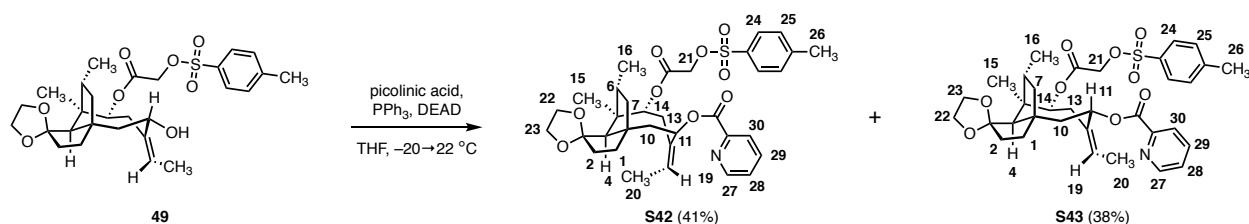

A solution of diethyl azodicarboxylate in tetrahydrofuran (1.0 M, 185  $\mu$ L, 1.50 equiv) was added dropwise over 1 min to a solution of picolinic acid (22.8 mg, 185  $\mu$ mol, 1.50 equiv), triphenylphosphine (32.2 mg, 185  $\mu$ mol, 1.50 equiv) and the allylic alcohol **49** [66.0 mg, 123  $\mu$ mol, 1 equiv; dried by azeotropic distillation with benzene ( $3 \times 1.0$  mL)], in tetrahydrofuran (820  $\mu$ L) at  $-20$  °C. The reaction mixture was stirred for 5 h at  $-20$  °C. The reaction vessel was removed from the cooling bath and allowed to warm to 22 °C over 20 min. The reaction mixture was stirred for 16 h at 22 °C. The product mixture was diluted sequentially with ether (2.0 mL) and saturated aqueous sodium bicarbonate solution (1.0 mL). The resulting biphasic mixture was transferred to a borosilicate test tube and the layers that formed were separated. The aqueous layer was extracted with ether ( $3 \times 2.0$  mL). The organic layers were combined and the combined organic layers were washed with saturated aqueous sodium chloride solution (2.0 mL). The washed organic layer was dried over magnesium sulfate. The dried solution was filtered and the filtrate was concentrated. The residue obtained was purified by flash-column chromatography (eluting with 15% ethyl acetate–hexanes initially, grading to 60% ethyl acetate–hexanes, three steps) to provide separately the ester **S42** (white solid, 32.6 mg, 41%) and the ester **S43** (white solid, 30.0 mg, 38%).

<sup>1</sup>H NMR analysis (500 MHz) of the unpurified product mixture indicated the presence of a 1.1:1 mixture of C11 diastereomers. The relative stereochemistry of the C11 alcohol of **S42** was determined by NOE analysis of the allylic alcohol **52**.

**S42**:  $R_f = 0.65$  (75% ethyl acetate–hexanes; PAA). <sup>1</sup>H NMR (600 MHz, C<sub>6</sub>D<sub>6</sub>)  $\delta$  8.43 (d,  $J = 3.8$  Hz, 1H, H<sub>27</sub>), 8.05 (d,  $J = 7.8$  Hz, 1H, H<sub>30</sub>), 7.80 (d,  $J = 8.3$  Hz, 2H, H<sub>24</sub>), 6.98 (td,  $J = 7.7$ , 1.8 Hz, 1H, H<sub>29</sub>), 6.66 (d,  $J = 8.0$  Hz, 2H, H<sub>25</sub>), 6.58 (ddd,  $J = 7.6$ , 4.7, 1.2 Hz, 1H, H<sub>28</sub>), 5.99 (dd,  $J = 5.0$ , 3.1 Hz, 1H, H<sub>11</sub>), 5.61 (q,  $J = 6.9$  Hz, 1H, H<sub>19</sub>), 5.51 (dd,  $J = 6.7$ , 2.4 Hz, 1H, H<sub>14</sub>), 4.53 – 4.42 (m, 2H, H<sub>21</sub>), 3.65 – 3.53 (m, 2H, H<sub>22</sub> or <sub>23</sub>), 3.46 – 3.37 (m, 2H, H<sub>22</sub> or <sub>23</sub>), 2.91 – 2.67 (m, 2H, H<sub>4</sub>, H<sub>13a</sub>), 2.44 – 2.34 (m, 1H, H<sub>6</sub>), 2.17 (dd,  $J = 15.3$ , 3.2 Hz, 1H, H<sub>10a</sub>), 2.11 – 2.01 (m, 1H, H<sub>10b</sub>), 1.80 (s, 3H, H<sub>26</sub>), 1.70 – 1.43 (m, 5H, H<sub>1</sub>, H<sub>2</sub>, H<sub>13b</sub>), 1.41 – 1.14 (m, 8H, H<sub>7</sub>, H<sub>15</sub>, H<sub>20</sub>), 0.99 (d,  $J = 7.2$  Hz, 3H, H<sub>16</sub>). <sup>13</sup>C NMR (150 MHz, C<sub>6</sub>D<sub>6</sub>)  $\delta$  165.2 (C), 164.0 (C), 149.5 (CH), 149.3 (C), 144.1 (C), 132.9 (C), 129.4 (2  $\times$  CH), 128.4 (broad, CH), 128.1 (2  $\times$  CH), 128.1 (CH), 125.8 (CH), 124.6 (CH), 119.6 (C), 81.3 (CH), 80.1 (CH), 64.6 (CH<sub>2</sub>), 63.4 (CH<sub>2</sub>), 63.1 (CH<sub>2</sub>), 56.0 (CH), 50.3 (C), 47.8 (C), 46.7 (CH<sub>2</sub>), 44.6 (CH<sub>2</sub>), 43.8 (CH), 42.1 (CH<sub>2</sub>), 35.6 (CH<sub>2</sub>), 29.8 (CH<sub>2</sub>), 20.7 (CH<sub>3</sub>), 19.7 (broad, CH<sub>3</sub>), 13.8 (CH<sub>3</sub>), 12.6 (CH<sub>3</sub>). IR (AT-FTIR), cm<sup>-1</sup>: 3733 (w), 3628 (w), 2360 (s), 2340 (m), 1733 (w), 669 (w). HRMS-ESI (m/z): [M + H]<sup>+</sup> calcd for [C<sub>34</sub>H<sub>41</sub>NNaO<sub>9</sub>S]<sup>+</sup> 662.2400; found 662.2388.  $[\alpha]_D^{20} = -6.98$  ( $c = 0.063$ , CHCl<sub>3</sub>).

**S43**:  $R_f = 0.60$  (75% ethyl acetate–hexanes; PAA). <sup>1</sup>H NMR (500 MHz, C<sub>6</sub>D<sub>6</sub>, 77 °C)  $\delta$  8.45 – 8.41 (m, 1H, H<sub>27</sub>), 7.89 (dd,  $J = 8.1$ , 6.4 Hz, 3H, H<sub>24</sub>, H<sub>30</sub>), 7.04 (td,  $J = 7.7$ , 1.7 Hz, 1H, H<sub>29</sub>), 6.77 (d,



$J = 8.1$  Hz, 2H, H<sub>25</sub>), 6.67 (dd,  $J = 7.7, 4.7$  Hz, 1H, H<sub>28</sub>), 5.97 (d,  $J = 7.8$  Hz, 1H, H<sub>11</sub>), 5.45 (q,  $J = 6.5$  Hz, 1H, H<sub>19</sub>), 5.21 (d,  $J = 7.7$  Hz, 1H, H<sub>14</sub>), 5.05 (d,  $J = 15.7$  Hz, 1H, H<sub>21a</sub>), 4.75 (d,  $J = 15.6$  Hz, 1H, H<sub>21b</sub>), 3.58 – 3.50 (m, 2H, H<sub>22 or 23</sub>), 3.44 – 3.37 (m, 2H, H<sub>22 or 23</sub>), 2.80 (s, 1H, H<sub>4</sub>), 2.63 (dd,  $J = 16.2, 7.8$  Hz, 1H, H<sub>13a</sub>), 2.48 – 2.36 (m, 2H, H<sub>6, H13b</sub>), 2.25 (d,  $J = 18.1$  Hz, 1H, H<sub>10a</sub>), 2.08 (dd,  $J = 18.1, 7.9$  Hz, 1H, H<sub>10b</sub>), 1.87 (s, 3H, H<sub>26</sub>), 1.70 – 1.28 (m, 6H, H<sub>1, H2, H7</sub>), 1.26 (d,  $J = 6.5$  Hz, 3H, H<sub>20</sub>), 1.23 (s, 3H, H<sub>15</sub>), 0.78 (d,  $J = 7.4$  Hz, 3H, H<sub>16</sub>). <sup>13</sup>C NMR (150 MHz, C<sub>6</sub>D<sub>6</sub>)  $\delta$  166.2 (C), 164.3 (C), 149.3 (CH), 149.0 (C), 143.8 (C), 135.9 (CH), 133.9 (C), 132.8 (C), 129.3 (2  $\times$  CH), 128.3 (2  $\times$  CH; detected by HSQC), 127.2 (CH), 125.9 (CH), 124.8 (CH), 119.5 (C), 78.4 (CH), 77.0 (CH), 64.9 (CH<sub>2</sub>), 63.4 (CH<sub>2</sub>), 62.9 (CH<sub>2</sub>), 53.9 (CH), 49.9 (C), 49.1 (CH<sub>2</sub>), 47.4 (C), 43.0 (CH), 42.9 (CH<sub>2</sub>), 42.2 (CH<sub>2</sub>), 35.5 (CH<sub>2</sub>), 30.6 (CH<sub>2</sub>), 20.8 (CH<sub>3</sub>), 19.8 (CH<sub>3</sub>), 19.8 (CH<sub>3</sub>), 11.5 (CH<sub>3</sub>). IR (AT-FTIR), cm<sup>-1</sup>: 2362 (s), 2341 (m), 773 (m). HRMS-ESI (m/z): [M + H]<sup>+</sup> calcd for [C<sub>34</sub>H<sub>41</sub>NNaO<sub>9</sub>S]<sup>+</sup> 662.2400; found 662.2390.  $[\alpha]_D^{20} = -62.4$  ( $c = 0.050$ , CHCl<sub>3</sub>).



Synthesis of the allylic alcohol **52**.

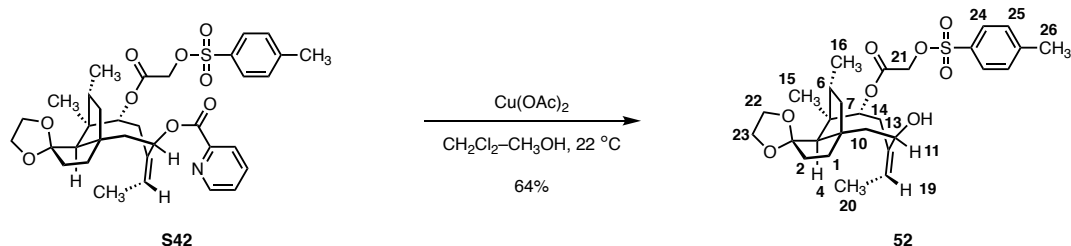

Copper acetate (4.50 mg, 25.0  $\mu\text{mol}$ , 0.50 equiv) was added to a solution of methanol (20.0  $\mu\text{L}$ , 500  $\mu\text{mol}$ , 10.0 equiv) and the picolinic ester **S42** (32.0 mg, 50.0  $\mu\text{mol}$ , 1 equiv) in dichloromethane (500  $\mu\text{L}$ ) at 22  $^{\circ}\text{C}$ . The reaction mixture was placed in an oil bath that had been preheated to 30  $^{\circ}\text{C}$ . The reaction mixture was stirred for 4 h at 30  $^{\circ}\text{C}$ . The product mixture was cooled to 22  $^{\circ}\text{C}$  over 10 min. The cooled product mixture was diluted with dichloromethane (1.0 mL) and 0.1 N aqueous ethylenediaminetetraacetic acid solution (1.0 mL). The resulting biphasic mixture was stirred for 10 min at 22  $^{\circ}\text{C}$ . The stirred biphasic mixture was transferred to a borosilicate test tube and the layers that formed were separated. The aqueous layer was extracted with dichloromethane ( $3 \times 1.0$  mL). The organic layers were combined and the combined organic layers were washed with saturated aqueous sodium chloride solution (2.0 mL). The washed organic layer was dried over sodium sulfate. The dried solution was filtered and the filtrate was concentrated. The residue obtained was purified by flash-column chromatography (eluting with 30% ethyl acetate–hexanes initially, grading to 60% ethyl acetate–hexanes, three steps) to provide the allylic alcohol **52** as a colorless foam (17.0 mg, 64%).

The relative stereochemistry of the (11*S*) alcohol was determined by NOE correlations between H11 and H19 and further supported by comparison to the (11*R*) diastereomer **49**.

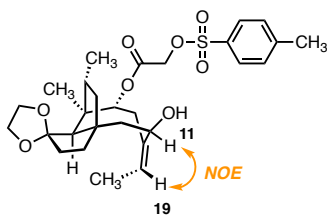

$R_f = 0.62$  (60% ethyl acetate–hexanes; PAA).  $^1\text{H}$  NMR (600 MHz,  $\text{C}_6\text{D}_6$ )  $\delta$  7.77 (d,  $J = 8.3$  Hz, 2H, H<sub>24</sub>), 6.66 (d,  $J = 8.0$  Hz, 2H, H<sub>25</sub>), 5.68 (dd,  $J = 7.3, 6.2$  Hz, 1H, H<sub>14</sub>), 5.24 (q,  $J = 6.9$  Hz, 1H, H<sub>19</sub>), 4.49 (d,  $J = 1.5$  Hz, 2H, H<sub>21</sub>), 4.17 (dt,  $J = 5.4, 2.7$  Hz, 1H, H<sub>11</sub>), 3.57 (dd,  $J = 6.1, 3.9$  Hz, 2H, H<sub>22</sub> or <sub>23</sub>), 3.47 – 3.38 (m, 2H, H<sub>22</sub> or <sub>23</sub>), 2.69 – 2.63 (m, 2H, H<sub>4</sub>, H<sub>13a</sub>), 2.40 – 2.29 (m, 1H, H<sub>6</sub>), 1.96 (dd,  $J = 14.7, 2.7$  Hz, 1H, H<sub>10a</sub>), 1.88 – 1.82 (m, 1H, H<sub>10b</sub>), 1.79 (s, 3H, H<sub>26</sub>), 1.69 – 1.44 (m, 7H, H<sub>1</sub>, H<sub>2</sub>, H<sub>7</sub>, H<sub>13b</sub>), 1.32 (d,  $J = 6.9$  Hz, 3H, H<sub>20</sub>), 1.27 (s, 3H, H<sub>15</sub>), 0.88 (d,  $J = 7.2$  Hz, 3H, H<sub>16</sub>).  $^{13}\text{C}$  NMR (150 MHz,  $\text{C}_6\text{D}_6$ )  $\delta$  165.5 (C), 144.1 (C), 137.0 (C), 133.6 (C), 129.4 (2  $\times$  CH), 127.2 (2  $\times$  CH), 125.2 (CH), 119.7 (C), 79.6 (CH), 79.3 (CH), 64.6 (CH<sub>2</sub>), 63.4 (CH<sub>2</sub>), 63.0 (CH<sub>2</sub>), 55.9 (CH), 50.1 (C), 48.4 (CH<sub>2</sub>), 48.0 (C), 44.9 (CH<sub>2</sub>), 43.8 (CH<sub>2</sub>), 42.3 (CH<sub>2</sub>), 35.6 (CH), 29.8 (CH<sub>2</sub>), 20.7 (CH<sub>3</sub>), 18.6 (broad, CH<sub>3</sub>), 13.8 (CH<sub>3</sub>), 12.7 (CH<sub>3</sub>). IR (AT-FTIR),  $\text{cm}^{-1}$ : 2916 (s), 2849 (m), 2362 (m), 2338 (m), 1732 (w), 1040 (m). HRMS-ESI ( $m/z$ ):  $[\text{M} + \text{H}]^+$  calcd for  $[\text{C}_{28}\text{H}_{38}\text{NaO}_8\text{S}]^+$  557.2185; found 557.2177.  $[\alpha]_D^{20} = -948.4$  ( $c = 0.031$ ,  $\text{CHCl}_3$ ).

Synthesis of the reduction products **53** and **54**.

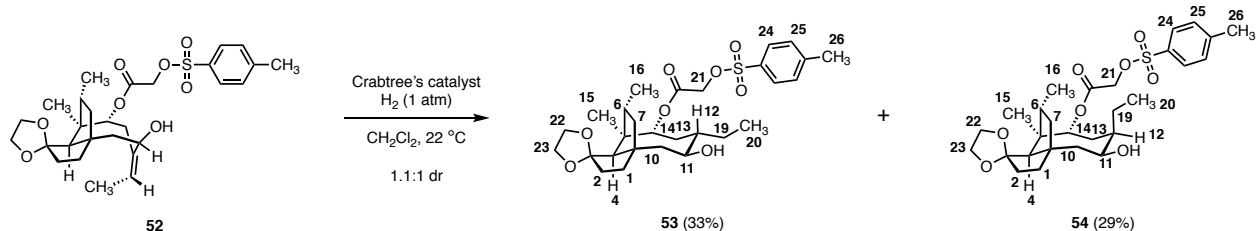

Crabtree's catalyst (600 μg, 0.75 μmol, 0.05 equiv) was added to a solution of the alkene **52** [8.00 mg, 15.0 μmol, 1 equiv; dried by azeotropic distillation with benzene (3 × 1.0 mL)] in dichloromethane (750 μL) at 22 °C. The reaction vessel was purged with dihydrogen and placed under a balloon of dihydrogen. The reaction mixture was stirred for 1 h at 22 °C. The product mixture was concentrated. The residue obtained was purified by preparative thin-layered chromatography (eluting with 75% ethyl acetate–hexanes) to provide separately the (12*S*) reduction product **53** (clear oil, 2.20 mg, 33%) and the (12*R*) reduction product **54** (clear oil, 2.00 mg, 29%)

<sup>1</sup>H NMR analysis (500 MHz) of the unpurified product mixture indicated the presence of a 1:1 mixture of C12 diastereomers.

**53**: R<sub>f</sub> = 0.53 (75% ethyl acetate–hexanes; PAA). <sup>1</sup>H NMR (600 MHz, CDCl<sub>3</sub>) δ 7.83 (d, *J* = 8.0 Hz, 2H, H<sub>24</sub>), 7.35 (d, *J* = 8.0 Hz, 2H, H<sub>25</sub>), 5.00 (d, *J* = 8.0 Hz, 1H, H<sub>14</sub>), 4.55 (s, 2H, H<sub>21</sub>), 3.85 (dddd, *J* = 44.4, 24.7, 12.7, 6.2 Hz, 4H, H<sub>22</sub>, H<sub>23</sub>), 3.45 (t, *J* = 9.9 Hz, 1H, H<sub>11</sub>), 2.45 (s, 3H, H<sub>26</sub>), 2.25 – 2.13 (m, 2H, H<sub>6</sub>, H<sub>10a</sub>), 1.97 (dd, *J* = 14.0, 9.9 Hz, 1H, H<sub>13a</sub>), 1.89 – 1.81 (m, 3H, H<sub>4</sub>, H<sub>7a</sub>, H<sub>10b</sub>), 1.76 – 1.47 (m, 6H, H<sub>1</sub>, H<sub>2</sub>, H<sub>12</sub>, H<sub>19a</sub>), 1.42 – 1.28 (m, 3H, H<sub>7b</sub>, H<sub>13b</sub>, H<sub>19b</sub>), 1.14 (s, 3H, H<sub>15</sub>), 0.88 (t, *J* = 7.5 Hz, 3H, H<sub>20</sub>), 0.70 (d, *J* = 7.0 Hz, 3H, H<sub>16</sub>). <sup>13</sup>C NMR (150 MHz, CDCl<sub>3</sub>) δ 165.9 (C), 145.4 (C), 132.8 (C), 130.1 (2 × CH), 128.3 (2 × CH), 120.5 (C), 76.4 (CH), 72.0 (CH), 65.1 (CH<sub>2</sub>), 64.5 (CH<sub>2</sub>), 63.4 (CH<sub>2</sub>), 58.9 (CH), 54.0 (CH<sub>2</sub>), 51.4 (CH<sub>2</sub>), 51.3 (C), 47.6 (CH), 47.1 (C), 42.2 (CH), 39.0 (CH<sub>2</sub>), 37.1 (CH<sub>2</sub>), 36.1 (CH<sub>2</sub>), 25.9 (CH<sub>2</sub>), 21.8 (CH<sub>3</sub>), 14.7 (CH<sub>3</sub>), 11.4 (CH<sub>3</sub>), 10.9 (CH<sub>3</sub>). IR (AT-FTIR), cm<sup>-1</sup>: 2957 (w), 2361 (m), 2340 (m), 1756 (s), 1040 (w). HRMS-ESI (m/z): [M + H]<sup>+</sup> calcd for [C<sub>28</sub>H<sub>40</sub>NaO<sub>8</sub>S]<sup>+</sup> 559.2342; found 559.2332. [α]<sub>D</sub><sup>20</sup> = –19.4 (*c* = 0.063, CHCl<sub>3</sub>).

The relative stereochemistry of (12*S*) diastereomer **53** is supported by an NOE correlation between H12 and H14.

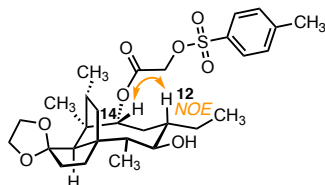

**54**: R<sub>f</sub> = 0.65 (75% ethyl acetate–hexanes; PAA). <sup>1</sup>H NMR (600 MHz, C<sub>6</sub>D<sub>6</sub>) δ 7.86 (d, *J* = 8.0 Hz, 2H, H<sub>24</sub>), 6.68 (d, *J* = 8.0 Hz, 2H, H<sub>25</sub>), 5.19 (d, *J* = 6.6 Hz, 1H, H<sub>14</sub>), 4.98 – 4.34 (m, 2H, H<sub>21</sub>), 3.64 (q, *J* = 6.6, 6.2 Hz, 1H, H<sub>22a</sub> or 23a), 3.54 (q, *J* = 7.1, 6.5 Hz, 1H, H<sub>22a</sub> or 23a), 3.51 (s, 1H, H<sub>11</sub>), 3.50 – 3.40 (m, 2H, H<sub>22b</sub>, H<sub>23b</sub>), 2.69 (s, 1H, H<sub>4</sub>), 2.59 – 2.46 (m, 2H, H<sub>7a</sub>, H<sub>13a</sub>), 2.43 – 2.32 (m,

1H, H<sub>6</sub>), 1.80 (s, 4H, H<sub>10a</sub>, H<sub>26</sub>), 1.75 – 1.43 (m, 7H, H<sub>1</sub>, H<sub>2</sub>, H<sub>7b</sub>, H<sub>10b</sub>, H<sub>12</sub>, H<sub>13b</sub>), 1.24 (s, 3H, H<sub>15</sub>), 1.08 (ddd, *J* = 13.3, 9.3, 7.0 Hz, 1H, H<sub>19a</sub>), 1.04 – 0.95 (m, 1H, H<sub>19b</sub>), 0.87 (d, *J* = 7.2 Hz, 3H, H<sub>16</sub>), 0.66 (t, *J* = 7.3 Hz, 3H, H<sub>20</sub>). <sup>13</sup>C NMR (150 MHz, C<sub>6</sub>D<sub>6</sub>) δ 165.2 (C), 144.0 (C), 133.7 (C), 129.4 (2 × CH), 128.2 (2 × CH), 119.9 (C), 81.2 (CH), 74.9 (CH), 64.5 (CH<sub>2</sub>), 63.3 (CH<sub>2</sub>), 63.2 (CH<sub>2</sub>), 56.7 (CH), 49.5 (C), 49.0 (CH<sub>2</sub>), 48.3 (C), 44.4 (CH<sub>2</sub>), 41.4 (CH), 43.6 (CH<sub>2</sub>), 35.9 (CH<sub>2</sub>), 35.5 (CH), 31.9 (CH<sub>2</sub>), 28.0 (CH<sub>2</sub>), 21.2 (CH<sub>3</sub>), 20.7 (CH<sub>3</sub>), 12.0 (CH<sub>3</sub>), 11.7 (CH<sub>3</sub>). IR (AT-FTIR), cm<sup>-1</sup>: 2955 (w), 2360 (s), 2340 (m), 1757 (s), 1177 (m), 1040 (w). HRMS-ESI (*m/z*): [M + H]<sup>+</sup> calcd for [C<sub>28</sub>H<sub>40</sub>NaO<sub>8</sub>S]<sup>+</sup> 559.2342; found 559.2340. [*a*]<sub>D</sub><sup>20</sup> = -27.9 (*c* = 0.094, CHCl<sub>3</sub>).

The relative stereochemistry of (12*R*) diastereomer **54** is supported by an NOE correlation between H11 and H12.

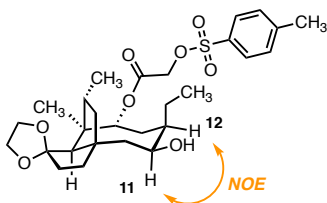

Synthesis of the sulfide **S44**.

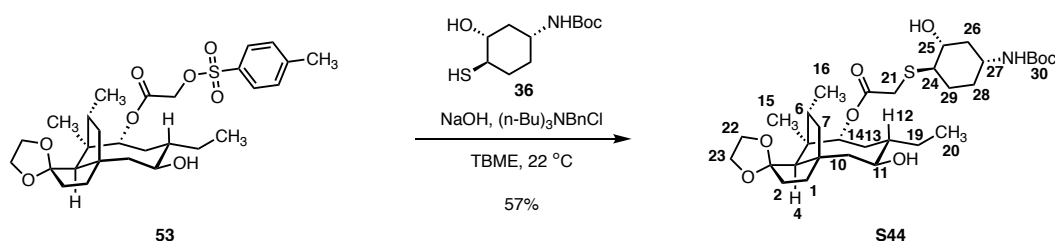

Aqueous sodium hydroxide solution (1 N, 4.70  $\mu$ L, 4.70  $\mu$ mol, 1.30 equiv) was added to a solution of the thiol **36** (1.50 mg, 4.70  $\mu$ mol, 1.30 equiv), benzyl tri-*n*-butylammonium chloride (177  $\mu$ g, 570 nmol, 0.20 equiv), and the sulfonate **53** (1.50 mg, 2.80  $\mu$ mol, 1 equiv) in *tert*-butyl methyl ether (200  $\mu$ L) at 22 °C. The reaction mixture was stirred for 2 h at 22 °C. The product mixture was diluted sequentially with ethyl acetate (1.0 mL) and 1 N aqueous sodium hydroxide solution (1.0 mL). The resulting biphasic mixture was transferred to a separatory funnel and the layers that formed were separated. The aqueous layer was extracted with ethyl acetate (2  $\times$  1.0 mL). The organic layers were combined and the combined organic layers were washed sequentially with aqueous sodium thiosulfate solution (10% w/v, 1.0 mL), aqueous phosphoric acid solution (10 mM, 1.0 mL), saturated aqueous sodium bicarbonate solution (1.0 mL), and saturated aqueous sodium chloride solution (1.0 mL). The washed organic layer was dried over magnesium sulfate. The dried solution was filtered and the filtrate was concentrated. The residue obtained was purified by flash-column chromatography (eluting with 30% ethyl acetate–hexanes initially, grading to 80% ethyl acetate–hexanes, three steps) to provide the displacement product **S44** as a white solid (1.00 mg, 57%).

$R_f = 0.53$  (75% ethyl acetate–hexanes; PAA). <sup>1</sup>H NMR (500 MHz, CDCl<sub>3</sub>)  $\delta$  4.99 (d,  $J = 7.9$  Hz, 1H, H<sub>14</sub>), 4.45 (s, 1H, NH), 3.98 – 3.76 (m, 4H, H<sub>22</sub>, H<sub>23</sub>), 3.60 – 3.33 (m, 4H, H<sub>11</sub>, H<sub>21a</sub>, H<sub>25</sub>, H<sub>27</sub>), 3.26 (d,  $J = 15.6$  Hz, 1H, H<sub>21b</sub>), 2.54 – 2.43 (m, 1H, H<sub>24</sub>), 2.36 (d,  $J = 12.3$  Hz, 1H, H<sub>26a</sub>), 2.25 – 2.14 (m, 2H, H<sub>6</sub>, H<sub>10a</sub>), 2.11 – 1.95 (m, 3H, H<sub>7a</sub>, H<sub>28a</sub>, H<sub>29a</sub>), 1.95 – 1.83 (m, 3H, H<sub>4</sub>, H<sub>10b</sub>, H<sub>13a</sub>), 1.81 – 1.57 (m, 7H, H<sub>1</sub>, H<sub>2</sub>, H<sub>12</sub>, H<sub>13b</sub>, H<sub>19a</sub>), 1.44 (s, 10H, H<sub>7b</sub>, H<sub>30</sub>), 1.38 – 1.06 (m, 7H, H<sub>15</sub>, H<sub>19b</sub>, H<sub>26b</sub>, H<sub>28b</sub>, H<sub>29b</sub>), 0.91 (t,  $J = 7.5$  Hz, 3H, H<sub>20</sub>), 0.77 (d,  $J = 7.1$  Hz, 3H, H<sub>16</sub>). <sup>13</sup>C NMR (125 MHz, CDCl<sub>3</sub>)  $\delta$  171.2 (C), 155.2 (C), 120.5 (C), 79.7 (broad, C), 76.1 (CH), 72.2 (CH), 71.7 (CH), 64.5 (CH<sub>2</sub>), 63.4 (CH<sub>2</sub>), 59.0 (CH), 54.1 (CH<sub>2</sub>), 53.0 (CH), 51.5 (C), 51.3 (CH<sub>2</sub>), 47.8 (CH), 47.8 (CH), 47.2 (C), 42.3 (CH), 40.7 (CH<sub>2</sub>), 39.0 (CH<sub>2</sub>), 37.1 (CH<sub>2</sub>), 36.2 (CH<sub>2</sub>), 33.2 (CH<sub>2</sub>), 33.1 (CH<sub>2</sub>), 29.6 (CH<sub>2</sub>), 28.5 (3  $\times$  CH<sub>3</sub>), 26.0 (CH<sub>2</sub>), 15.0 (CH<sub>3</sub>), 11.6 (CH<sub>3</sub>), 11.1 (CH<sub>3</sub>). IR (AT-FTIR), cm<sup>-1</sup>: 3357 (w), 2926 (s), 2856 (w), 2361 (s), 2341 (m), 1686 (m), 1170 (m). HRMS-ESI ( $m/z$ ): [M + H]<sup>+</sup> calcd for [C<sub>32</sub>H<sub>53</sub>NNaO<sub>8</sub>S]<sup>+</sup> 634.3390; found 634.3379. [ $\alpha$ ]<sub>D</sub><sup>20</sup> = -7.23 ( $c = 0.047$ , CHCl<sub>3</sub>).

Synthesis of the lefamulin derivative **55**.

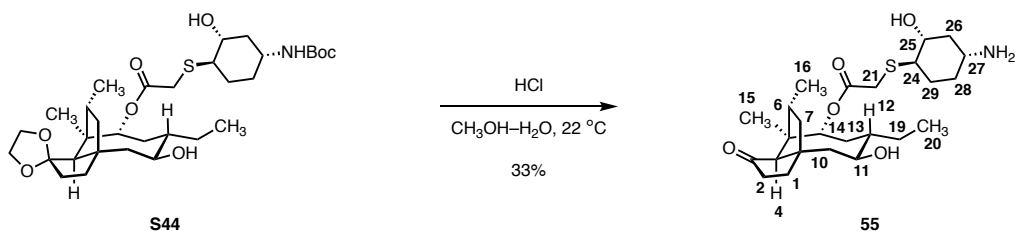

12 N concentrated hydrochloric acid solution (2.00  $\mu\text{L}$ , 24.0  $\mu\text{mol}$ , 15.0 equiv) was added to a solution of the ester **S44** (1.00 mg, 1.60  $\mu\text{mol}$ , 1 equiv) in methanol (200  $\mu\text{L}$ ) at 22  $^\circ\text{C}$ . The reaction mixture was stirred for 72 h at 22  $^\circ\text{C}$ . The product mixture was concentrated to provide the lefamulin derivative **55** as a fine white solid (260  $\mu\text{g}$ , 33%). The product obtained in this way was judged to be of >95% purity (600 MHz  $^1\text{H}$  NMR analysis) and was used in susceptibility testing without further purification.

$R_f = 0.05$  (95% ethyl acetate–hexanes; PAA).  $^1\text{H}$  NMR (600 MHz,  $\text{CD}_3\text{OD}$ )  $\delta$  4.98 (dd,  $J = 7.7$ , 2.0 Hz, 1H,  $\text{H}_{14}$ ), 3.59 – 3.52 (m, 2H,  $\text{H}_{21a}$ ,  $\text{H}_{25}$ ), 3.44 – 3.34 (m, 2H,  $\text{H}_{11}$ ,  $\text{H}_{21b}$ ), 3.23 – 3.18 (m, 1H,  $\text{H}_{27}$ ), 2.71 (s, 1H,  $\text{H}_{24}$ ), 2.39 – 2.14 (m, 6H,  $\text{H}_2$ ,  $\text{H}_{7a}$ ,  $\text{H}_{10a}$ ,  $\text{H}_{26a}$ ,  $\text{H}_{29a}$ ), 2.09 – 1.77 (m, 8H,  $\text{H}_1$ ,  $\text{H}_4$ ,  $\text{H}_{10b}$ ,  $\text{H}_{13}$ ,  $\text{H}_{19a}$ ,  $\text{H}_{28a}$ ), 1.69 – 1.28 (m, 7H,  $\text{H}_6$ ,  $\text{H}_{7b}$ ,  $\text{H}_{12}$ ,  $\text{H}_{19b}$ ,  $\text{H}_{26b}$ ,  $\text{H}_{28b}$ ,  $\text{H}_{29b}$ ), 1.25 (s, 3H,  $\text{H}_{15}$ ), 0.89 (td,  $J = 7.5$ , 1.7 Hz, 3H,  $\text{H}_{20}$ ), 0.83 (d,  $J = 6.7$  Hz, 3H,  $\text{H}_{16}$ ).  $^{13}\text{C}$  NMR (150 MHz,  $\text{CD}_3\text{OD}$ )  $\delta$  222.7 (C), 172.3 (C), 75.5 (CH), 73.1 (CH), 71.5 (CH), 61.4 (CH), 55.0 ( $\text{CH}_2$ ), 54.5 (C), 51.5 ( $\text{CH}_2$ ), 51.1 (CH), 49.6 (CH), 49.0 (CH; detected by HSQC), 46.9 (C), 46.0 (CH), 40.7 ( $\text{CH}_2$ ), 39.7 ( $\text{CH}_2$ ), 39.4 ( $\text{CH}_2$ ), 37.4 ( $\text{CH}_2$ ), 34.5 ( $\text{CH}_2$ ), 30.6 ( $\text{CH}_2$ ), 27.1 ( $\text{CH}_2$ ), 26.7 ( $\text{CH}_2$ ), 15.4 ( $\text{CH}_3$ ), 13.0 ( $\text{CH}_3$ ), 11.2 ( $\text{CH}_3$ ). IR (AT-FTIR),  $\text{cm}^{-1}$ : 2942 (w), 2358 (s), 2341 (m), 669 (w). HRMS-ESI ( $m/z$ ):  $[\text{M} + \text{H}]^+$  calcd for  $[\text{C}_{25}\text{H}_{42}\text{NO}_5\text{S}]^+$  468.2784; found 468.2775.  $[\alpha]_D^{20} = +458.6$  ( $c = 0.014$ ,  $\text{CHCl}_3$ ).

### Synthesis of the sulfide **S45**.

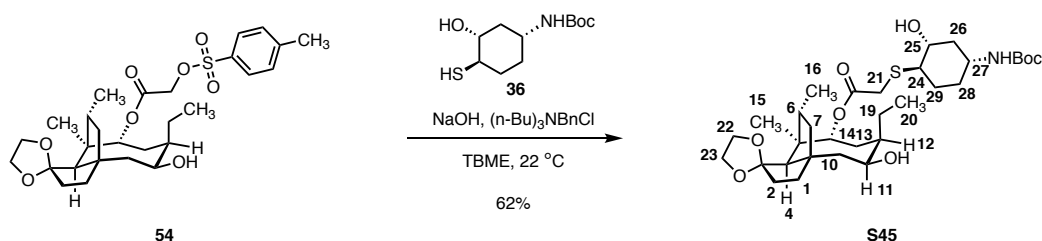

Aqueous sodium hydroxide solution (1 N, 4.40  $\mu$ L, 4.40  $\mu$ mol, 1.66 equiv) was added to a solution of the thiol **36** (2.20 mg, 4.40  $\mu$ mol, 1.66 equiv), benzyl tri-*n*-butylammonium chloride (165  $\mu$ g, 530 nmol, 0.20 equiv), and the sulfonate **54** (1.40 mg, 2.70  $\mu$ mol, 1 equiv) in *tert*-butyl methyl ether (200  $\mu$ L) at 22 °C. The reaction mixture was stirred for 2 h at 22 °C. The product mixture was diluted sequentially with ethyl acetate (1.0 mL) and 1 N aqueous sodium hydroxide solution (1.0 mL). The resulting biphasic mixture was transferred to a separatory funnel and the layers that formed were separated. The aqueous layer was extracted with ethyl acetate (2  $\times$  1.0 mL). The organic layers were combined and the combined organic layers were washed sequentially with aqueous sodium thiosulfate solution (10% w/v, 1.0 mL), 0.1 N aqueous phosphoric acid solution (1.0 mL), saturated aqueous sodium bicarbonate solution (1.0 mL), and saturated aqueous sodium chloride solution (1.0 mL). The washed organic layer was dried over magnesium sulfate. The dried solution was filtered and the filtrate was concentrated. The residue obtained was purified by flash-column chromatography (eluting with 30% ethyl acetate–hexanes initially, grading to 80% ethyl acetate–hexanes, three steps) to provide the sulfide **S45** as a white solid (1.00 mg, 62%).

$R_f$  = 0.53 (75% ethyl acetate–hexanes; PAA). <sup>1</sup>H NMR (600 MHz, C<sub>6</sub>D<sub>6</sub>)  $\delta$  5.20 (d,  $J$  = 6.7 Hz, 1H, H<sub>14</sub>), 4.34 (s, 1H, NH), 3.65 – 3.54 (m, 3H, H<sub>11</sub>, H<sub>22a</sub> or <sub>23a</sub>, H<sub>27</sub>), 3.49 (p,  $J$  = 7.8, 7.3 Hz, 1H, H<sub>22a</sub> or <sub>23a</sub>), 3.44 – 3.33 (m, 3H, H<sub>22b</sub>, H<sub>23b</sub>, H<sub>25</sub>), 3.27 (dd,  $J$  = 30.6, 15.4 Hz, 1H, H<sub>21a</sub>), 3.13 (dd,  $J$  = 24.8, 15.3 Hz, 1H, H<sub>21b</sub>), 2.74 (s, 1H, H<sub>4</sub>), 2.57 (dt,  $J$  = 24.2, 10.2 Hz, 3H, H<sub>7a</sub>, H<sub>24</sub>, H<sub>29a</sub>), 2.43 (dp,  $J$  = 14.9, 7.4 Hz, 1H, H<sub>6</sub>), 2.27 – 2.20 (m, 1H, H<sub>6</sub>), 1.91 – 1.60 (m, 8H, H<sub>1a</sub>, H<sub>10</sub>, H<sub>12</sub>, H<sub>13</sub>, H<sub>28a</sub>, H<sub>29b</sub>), 1.58 – 1.43 (m, 12H, H<sub>2</sub>, H<sub>7b</sub>, H<sub>30</sub>), 1.38 – 1.28 (m, 4H, H<sub>1a</sub>, H<sub>15</sub>), 1.23 – 1.05 (m, 4H, H<sub>19</sub>, H<sub>26b</sub>, H<sub>28b</sub>), 0.93 (d,  $J$  = 7.1 Hz, 3H, H<sub>16</sub>), 0.84 (t,  $J$  = 7.4 Hz, 3H, H<sub>20</sub>). <sup>13</sup>C NMR (150 MHz, C<sub>6</sub>D<sub>6</sub>)  $\delta$  170.2 (C), 154.6 (C), 120.0 (C), 80.7 (CH), 78.2 (C), 74.4 (CH), 71.3 (CH), 63.3 (CH<sub>2</sub>), 62.9 (CH<sub>2</sub>), 57.0 (CH), 51.4 (CH), 49.5 (C), 49.2 (CH<sub>2</sub>), 48.3 (C), 47.2 (CH), 44.3 (CH<sub>2</sub>), 44.0 (CH), 43.7 (CH<sub>2</sub>), 39.5 (broad, CH<sub>2</sub>), 35.7 (CH<sub>2</sub>), 35.6 (CH), 32.1 (CH<sub>2</sub>), 32.0 (CH<sub>2</sub>), 31.7 (broad, CH<sub>2</sub>), 29.8 (CH<sub>2</sub>), 28.1 (3  $\times$  CH<sub>3</sub>), 27.7 (CH<sub>2</sub>), 21.2 (CH<sub>3</sub>), 12.1 (CH<sub>3</sub>), 12.1 (CH<sub>3</sub>). IR (AT-FTIR), cm<sup>-1</sup>: 3727 (w), 2360 (s), 2340 (m), 669 (s). HRMS-ESI ( $m/z$ ): [M + H]<sup>+</sup> calcd for [C<sub>32</sub>H<sub>53</sub>NNaO<sub>8</sub>S]<sup>+</sup> 634.3390; found 634.3375.  $[\alpha]_D^{20}$  = -12.8 ( $c$  = 0.100, CHCl<sub>3</sub>).

Synthesis of the lefamulin derivative **56**.

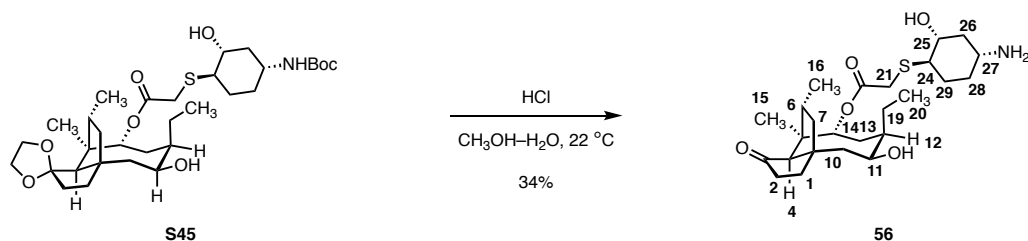

Aqueous hydrochloric acid solution (12 N, 2.00  $\mu\text{L}$ , 24.0  $\mu\text{mol}$ , 15.0 equiv) was added to a solution of the thioglycolic ester **S45** (1.00 mg, 1.60  $\mu\text{mol}$ , 1 equiv) in methanol (200  $\mu\text{L}$ ) at 22  $^\circ\text{C}$ . The reaction mixture was stirred for 72 h at 22  $^\circ\text{C}$ . The product mixture was concentrated to provide the lefamulin derivative **56** as a fine, white solid (280  $\mu\text{g}$ , 34%). The product obtained in this way was judged to be of >95% purity (600 MHz  $^1\text{H}$  NMR analysis) and was used in susceptibility testing without further purification.

$R_f = 0.05$  (95% ethyl acetate–hexanes; PAA).  $^1\text{H}$  NMR (600 MHz,  $\text{CD}_3\text{OD}$ )  $\delta$  4.96 (d,  $J = 6.7$  Hz, 1H,  $\text{H}_{14}$ ), 3.97 (t,  $J = 3.6$  Hz, 1H,  $\text{H}_{11}$ ), 3.64 – 3.55 (m, 2H,  $\text{H}_{21a}$ ,  $\text{H}_{25}$ ), 3.49 (d,  $J = 15.5$  Hz, 1H,  $\text{H}_{21b}$ ), 3.24 – 3.18 (m, 1H,  $\text{H}_{27}$ ), 2.97 (t,  $J = 13.7$  Hz, 1H,  $\text{H}_{7a}$ ), 2.79 (td,  $J = 9.9, 9.4, 3.8$  Hz, 1H,  $\text{H}_{24}$ ), 2.59 (s, 1H,  $\text{H}_4$ ), 2.56 – 2.50 (m, 1H,  $\text{H}_{13a}$ ), 2.37 (dddd,  $J = 16.6, 13.6, 9.5, 3.0$  Hz, 1H,  $\text{H}_{2a}$ ), 2.32 – 2.19 (m, 2H,  $\text{H}_{26a}$ ,  $\text{H}_{29a}$ ), 2.15 (dd,  $J = 15.6, 3.0$  Hz, 2H,  $\text{H}_{2b}$ ,  $\text{H}_{10a}$ ), 2.09 – 1.98 (m, 3H,  $\text{H}_{1a}$ ,  $\text{H}_6$ ,  $\text{H}_{28a}$ ), 1.89 (q,  $J = 7.3$  Hz, 1H,  $\text{H}_{12}$ ), 1.79 (ddd,  $J = 32.7, 14.8, 7.0$  Hz, 2H,  $\text{H}_{7b}$ ,  $\text{H}_{10b}$ ), 1.64 – 1.42 (m, 4H,  $\text{H}_{1b}$ ,  $\text{H}_{13b}$ ,  $\text{H}_{26b}$ ,  $\text{H}_{29b}$ ), 1.42 – 1.23 (m, 3H,  $\text{H}_{19}$ ,  $\text{H}_{28b}$ ), 1.02 (d,  $J = 7.1$  Hz, 3H,  $\text{H}_{16}$ ), 0.94 (s, 3H,  $\text{H}_{15}$ ), 0.85 (t,  $J = 7.4$  Hz, 3H,  $\text{H}_{20}$ ).  $^{13}\text{C}$  NMR (150 MHz,  $\text{CD}_3\text{OD}$ )  $\delta$  221.2 (C), 170.6 (C), 78.0 (CH), 73.5 (CH), 71.9 (CH), 61.5 (CH), 52.5 (C), 49.5 (CH), 49.2 ( $\text{CH}_2$ ), 48.1 (C), 47.8 (CH; detected by HSQC), 46.8 (CH), 45.5 ( $\text{CH}_2$ ), 40.1 ( $\text{CH}_2$ ), 39.3 ( $\text{CH}_2$ ), 37.8 ( $\text{CH}_2$ ), 36.0 (CH), 33.0 ( $\text{CH}_2$ ), 31.8 ( $\text{CH}_2$ ), 29.0 ( $\text{CH}_2$ ), 27.9 ( $\text{CH}_2$ ), 27.3 ( $\text{CH}_2$ ), 22.3 ( $\text{CH}_3$ ), 11.6 ( $\text{CH}_3$ ), 11.3 ( $\text{CH}_3$ ). IR (AT-FTIR),  $\text{cm}^{-1}$ : 3733 (w), 2360 (s), 2341 (m), 669 (w). HRMS-ESI ( $m/z$ ):  $[\text{M} + \text{H}]^+$  calcd for  $[\text{C}_{25}\text{H}_{42}\text{NO}_5\text{S}]^+$  468.2784; found 468.2771.  $[\alpha]_D^{20} = -9.47$  ( $c = 0.019$ ,  $\text{CH}_3\text{OH}$ ).



### Synthesis of the dialdehyde **S46**.

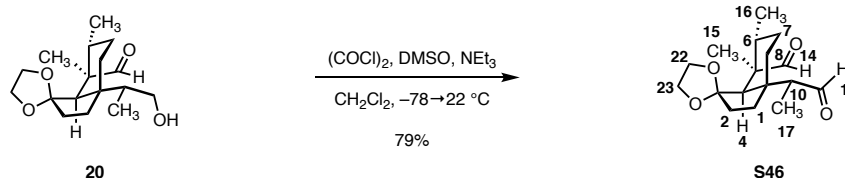

Oxalyl chloride (149  $\mu\text{L}$ , 1.74 mmol, 1.20 equiv) was added to a solution of dimethylsulfoxide (134  $\mu\text{L}$ , 1.89 mmol, 1.30 equiv) in dichloromethane (7.3 mL) at  $-78 \text{ }^\circ\text{C}$ . The resulting solution was stirred for 15 min at  $-78 \text{ }^\circ\text{C}$ . A solution of the hydroxyaldehyde **20** [430 mg, 1.45 mmol, 1 equiv; dried by azeotropic distillation with benzene ( $3 \times 1.0 \text{ mL}$ )] in dichloromethane (1.0 mL) was added dropwise over 5 min at  $-78 \text{ }^\circ\text{C}$ . The reaction mixture was stirred for 30 min at  $-78 \text{ }^\circ\text{C}$ . Triethylamine (605  $\mu\text{L}$ , 4.35 mmol, 3.00 equiv) was then added dropwise over 2 min at  $-78 \text{ }^\circ\text{C}$ . Upon completion of the addition, the cooling bath was removed and the reaction mixture was allowed to warm to  $22 \text{ }^\circ\text{C}$  over 30 min. The product mixture was diluted sequentially with ether (10 mL) and saturated aqueous ammonium chloride solution (5.0 mL). The resulting biphasic mixture was transferred to a separatory funnel and the layers that formed were separated. The aqueous layer was extracted with ether ( $3 \times 10 \text{ mL}$ ). The organic layers were combined and the combined organic layers were washed sequentially with water (10 mL) and saturated aqueous sodium chloride solution (10 mL). The dried solution was filtered and the filtrate was concentrated. The residue obtained was purified by flash-column chromatography (eluting with 5% ethyl acetate–hexanes initially, grading to 20% ethyl acetate–hexanes, three steps) to provide the dialdehyde **S46** as a colorless oil (338 mg, 79%).

$R_f = 0.31$  (43% ether–hexanes; PAA).  $^1\text{H NMR}$  (400 MHz,  $\text{C}_6\text{D}_6$ )  $\delta$  9.76 (d,  $J = 1.6 \text{ Hz}$ , 1H,  $\text{H}_{11}$ ), 9.40 (s, 1H,  $\text{H}_{14}$ ), 3.46 – 3.34 (m, 2H,  $\text{H}_{22a}$ ,  $\text{H}_{23a}$ ), 3.34 – 3.24 (m, 2H,  $\text{H}_{22b}$ ,  $\text{H}_{23b}$ ), 2.95 (s, 1H,  $\text{H}_4$ ), 2.61 (q,  $J = 6.7 \text{ Hz}$ , 1H,  $\text{H}_{10}$ ), 1.93 (s, 1H,  $\text{H}_6$ ), 1.85 – 1.61 (m, 6H,  $\text{H}_1$ ,  $\text{H}_2$ ,  $\text{H}_8$ ), 1.34 (qd,  $J = 6.4$ , 4.3, 3.3 Hz, 2H,  $\text{H}_7$ ), 1.15 (s, 3H,  $\text{H}_{15}$ ), 0.92 (d,  $J = 7.2 \text{ Hz}$ , 3H,  $\text{H}_{16}$ ), 0.84 (d,  $J = 7.0 \text{ Hz}$ , 3H,  $\text{H}_{17}$ ).  $^{13}\text{C NMR}$  (150 MHz,  $\text{C}_6\text{D}_6$ )  $\delta$  204.9 (CH), 204.7 (CH), 119.9 (C), 63.9 ( $\text{CH}_2$ ), 62.8 ( $\text{CH}_2$ ), 49.6 (C), 47.6 (CH), 45.6 (C), 35.6 ( $\text{CH}_2$ ), 35.6 ( $\text{CH}_2$ ), 35.0 (CH), 30.5 ( $\text{CH}_2$ ), 26.7 ( $\text{CH}_2$ ), 19.0 ( $\text{CH}_3$ ), 15.3 ( $\text{CH}_3$ ), 9.7 ( $\text{CH}_3$ ). IR (ATR-FTIR),  $\text{cm}^{-1}$ : 2943 (m), 2880 (w), 2360 (s), 2341 (m), 2330 (m), 1716 (m), 772 (w). HRMS-ESI ( $m/z$ ):  $[\text{M} + \text{Na}]^+$  calcd for  $[\text{C}_{17}\text{H}_{26}\text{NaO}_4]^+$  317.1729; found 317.1729.  $[\alpha]_D^{20} = -92.7$  ( $c = 0.118$ ,  $\text{CHCl}_3$ ). Note: Owing to the presence of conformational equilibria, extensive line broadening was observed in the  $^{13}\text{C NMR}$  spectrum of **S46** and the  $^{13}\text{C}$  shift of C10 could not be resolved.



Synthesis of the propargylic alcohol **57**.

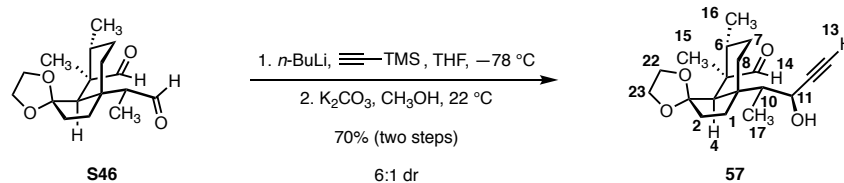

A solution of *n*-butyllithium in hexanes (1.8 M, 694  $\mu\text{L}$ , 1.26 mmol, 1.10 equiv) was added dropwise to a solution of trimethylsilylacetylene (178  $\mu\text{L}$ , 1.26 mmol, 1.10 equiv) in tetrahydrofuran (1.7 mL) at  $-78^\circ\text{C}$ . The resulting solution was stirred for 1 h at  $-78^\circ\text{C}$ . The stirred solution was added dropwise over 5 min to a solution of the dialdehyde **S46** [338 mg, 1.15 mmol, 1 equiv; dried by azeotropic distillation with benzene ( $3 \times 2.0$  mL)] in tetrahydrofuran (4.0 mL) at  $-78^\circ\text{C}$ . The reaction mixture was stirred at  $-78^\circ\text{C}$  for 20 min. The product mixture was diluted sequentially with ether (5.0 mL) and saturated aqueous ammonium chloride solution (4.0 mL). The resulting biphasic was allowed to warm to  $22^\circ\text{C}$  over 20 min. The warmed mixture was stirred for 15 min at  $22^\circ\text{C}$ . The stirred biphasic mixture was transferred to a separatory funnel and the layers that formed were separated. The aqueous layer was extracted with ether ( $3 \times 5.0$  mL). The organic layers were combined and the combined organic layers were washed sequentially with water (10 mL) and saturated aqueous sodium chloride solution (10 mL). The dried solution was filtered and the filtrate was concentrated. The residue obtained was used directly in the following step.

Potassium carbonate (238 mg, 1.72 mmol, 1.50 equiv) was added to a solution of the unpurified product obtained in the preceding step (nominally 1.15 mmol, 1 equiv) in methanol (5.0 mL) at  $0^\circ\text{C}$ . The reaction mixture was stirred at  $0^\circ\text{C}$  for 2 h. The product mixture was diluted sequentially with ether (10 mL) and saturated aqueous ammonium chloride solution (5.0 mL). The resulting biphasic mixture was transferred to a separatory funnel and the layers that formed were separated. The aqueous layer was extracted with ether ( $3 \times 10$  mL). The organic layers were combined and the combined organic layers were washed sequentially with water (10 mL) and saturated aqueous sodium chloride solution (10 mL). The dried solution was filtered and the filtrate was concentrated. The residue obtained was purified by flash-column chromatography (eluting with 15% ethyl acetate–hexanes initially, grading to 30% ethyl acetate–hexanes, four steps) to provide the propargylic alcohol **57** as an off-white foam (257 mg, 70% over two steps).

$^1\text{H}$  NMR analysis (500 MHz) of the unpurified product mixture indicated a 6:1 mixture of C11 diastereomers. The major diastereomer was assigned as the (11*S*) isomer by NOE analysis of the allylic alcohol **58**.

$R_f = 0.48$  (30% ethyl acetate–hexanes; PAA).  $^1\text{H}$  NMR (600 MHz,  $\text{CDCl}_3$ )  $\delta$  9.57 (s, 1H, H<sub>14</sub>), 4.62 (s, 1H, H<sub>11</sub>), 3.46–3.36 (m, 2H, H<sub>22a</sub>, H<sub>23a</sub>), 3.36–3.27 (m, 3H, H<sub>13</sub>, H<sub>22b</sub>, H<sub>23b</sub>), 2.75 (s, 1H, H<sub>4</sub>), 2.23–2.15 (m, 1H, H<sub>8a</sub>), 2.12–2.04 (m, 1H, H<sub>10</sub>), 2.04–1.97 (m, 1H, H<sub>16</sub>), 1.81–1.41 (m, 3H, H<sub>2</sub>, H<sub>6</sub>), 1.39–1.23 (m, 4H, H<sub>1</sub>, H<sub>7</sub>), 1.21 (s, 3H, H<sub>15</sub>), 1.16 (d,  $J = 6.9$  Hz, 4H, H<sub>8b</sub>, H<sub>16</sub>), 0.92 (d,  $J = 7.2$  Hz, 3H, H<sub>17</sub>).  $^{13}\text{C}$  NMR (150 MHz,  $\text{CDCl}_3$ )  $\delta$  205.1 (CH), 120.2 (C), 86.5 (C), 72.2 (CH), 63.9 (CH<sub>2</sub>), 62.7 (CH<sub>2</sub>), 62.5 (CH), 49.7 (C), 49.0 (CH), 46.8 (C), 40.7 (CH), 35.7 (CH<sub>2</sub>), 35.0 (CH), 30.2 (CH<sub>2</sub>), 29.7 (CH<sub>2</sub>), 27.1 (CH<sub>2</sub>), 19.4 (CH<sub>3</sub>), 15.7 (CH<sub>3</sub>), 9.3 (CH<sub>3</sub>). IR (ATR-

FTIR),  $\text{cm}^{-1}$ : 2922 (m), 2359 (s), 2331 (w), 1716 (w). HRMS-ESI (m/z):  $[\text{M} + \text{Na}]^+$  calcd for  $[\text{C}_{19}\text{H}_{28}\text{NaO}_4]^+$  343.1885; found 343.1883.  $[\alpha]_D^{20} = -10.3$  ( $c = 0.094$ ,  $\text{CHCl}_3$ ).

Synthesis of the allylic alcohol **58**.

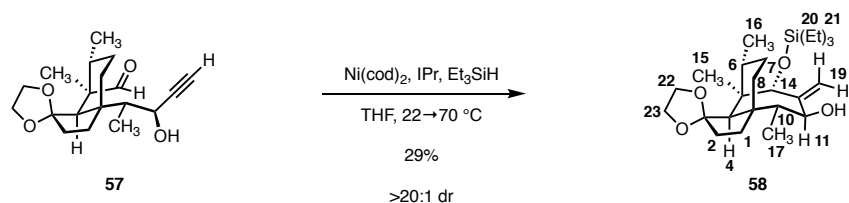

A solution of bis(cyclooctadiene)nickel(0) (44.1 mg, 160  $\mu\text{mol}$ , 0.20 equiv) and 1,3-bis(2,6-diisopropylphenyl)imidazol-2-ylidene (IPr, 62.3 mg, 160  $\mu\text{mol}$ , 0.20 equiv) in tetrahydrofuran (1.0 mL) was stirred for 30 min at 22  $^\circ\text{C}$  in a nitrogen-filled glovebox. The catalyst solution was added to a solution of triethylsilane (383  $\mu\text{L}$ , 2.41 mmol, 3.00 equiv) and the alkynyl aldehyde **57** (257 mg, 802  $\mu\text{mol}$ , 1 equiv) in tetrahydrofuran (15 mL) in a round-bottomed flask fused to a Teflon-coated valve at 22  $^\circ\text{C}$  in a nitrogen-filled glovebox. The reaction vessel was sealed and the sealed reaction vessel was removed from the glovebox and placed in an oil bath that had been preheated to 75  $^\circ\text{C}$ . The reaction mixture was stirred at 2 h at 75  $^\circ\text{C}$ . The product mixture was cooled to 22  $^\circ\text{C}$  over 20 min. The cooled product mixture was eluted over a short pad of silica gel (2.0 cm  $\times$  2.0 cm, eluting with 30% ether–hexanes). The filtrates were combined and the combined filtrates were concentrated. The residue obtained was purified by flash-column chromatography (eluting with 5% ether–hexanes initially, grading to 30% ether–hexanes, three steps) to provide the allylic alcohol **58** as a clear oil (99.0 mg, 29%).

Within the limits of detection (500 MHz  $^1\text{H}$  NMR analysis), **58** was formed as a single diastereomer. The relative stereochemistry of the C11 alcohol was determined by NOE correlations between H11 and H4. The relative stereochemistry of the C14 alcohol was determined by NOE correlations between H14 and H10.

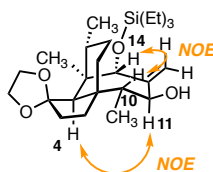

$R_f$  = 0.31 (45% ether–hexanes; PAA).  $^1\text{H}$  NMR (500 MHz,  $\text{CDCl}_3$ )  $\delta$  5.21 (d,  $J$  = 9.2 Hz, 2H, H<sub>19</sub>), 4.74 (s, 1H, H<sub>14</sub>), 4.00 (q,  $J$  = 6.8 Hz, 1H, H<sub>22a</sub> or H<sub>23a</sub>), 3.94 – 3.78 (m, 3H, H<sub>11</sub>, H<sub>22b</sub>, H<sub>23b</sub>), 3.78 – 3.66 (m, 1H, H<sub>22a</sub> or H<sub>23b</sub>), 2.31 – 2.19 (m, 1H, 1H, H<sub>6</sub>), 2.11 – 2.03 (m, 1H, H<sub>10</sub>), 1.86 – 1.75 (m, 3H, H<sub>2</sub>, H<sub>4</sub>), 1.58 – 1.13 (m, 18H, H<sub>1</sub>, H<sub>7</sub>, H<sub>8</sub>, H<sub>17</sub>, H<sub>21</sub>), 1.01 – 0.82 (m, 6H, H<sub>15</sub>, H<sub>16</sub>), 0.62 (q,  $J$  = 7.9 Hz, 6H, H<sub>20</sub>).  $^{13}\text{C}$  NMR (150 MHz,  $\text{CDCl}_3$ )  $\delta$  156.4 (C), 119.6 (C), 113.3 (CH<sub>2</sub>), 75.1 (CH), 69.9 (CH), 64.2 (CH<sub>2</sub>), 61.7 (CH<sub>2</sub>), 54.1 (CH), 44.3 (C), 43.8 (C), 37.1 (CH), 36.8 (CH<sub>2</sub>), 34.5 (CH), 30.4 (CH<sub>2</sub>), 28.7 (CH<sub>2</sub>), 28.3 (CH<sub>2</sub>), 17.5 (CH<sub>3</sub>), 13.8 (CH<sub>3</sub>), 13.6 (CH<sub>3</sub>), 7.3 (3  $\times$  CH<sub>3</sub>), 5.7 (3  $\times$  CH<sub>2</sub>). IR (ATR-FTIR),  $\text{cm}^{-1}$ : 2941 (m), 2359 (s), 2339 (w). HRMS-ESI ( $m/z$ ):  $[\text{M} + \text{H}]^+$  calcd for  $[\text{C}_{25}\text{H}_{45}\text{O}_4\text{Si}]^+$  437.3087; found 437.3082.  $[\alpha]_D^{20} = -7.97$  ( $c$  = 2.063,  $\text{CHCl}_3$ ).

Synthesis of the hydrogenation product **S47**.

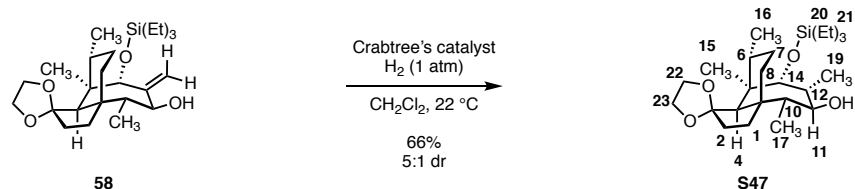

Crabtree's catalyst (1.70 mg, 2.10  $\mu\text{mol}$ , 5.0 mol%) was added to a solution of the alkene **58** [18.0 mg, 41.2  $\mu\text{mol}$ , 1 equiv; dried by azeotropic distillation with benzene ( $3 \times 1.0$  mL)] in dichloromethane (2.1 mL) at 22 °C. The reaction vessel was purged with dihydrogen and placed under a balloon of dihydrogen. The reaction mixture was stirred for 1 h at 22 °C. The product mixture was concentrated. The residue obtained was purified by flash-column chromatography (eluting with 10% ethyl acetate–hexanes initially, grading to 50% ethyl acetate–hexanes, three steps) to provide the hydrogenated product **S47** as a clear oil (12.0 mg, 66%).

$^1\text{H}$  NMR (500 MHz) analysis of the unpurified product mixture indicated the presence of a 5:1 mixture of diastereomers. The relative configuration of the major diastereomer was determined by NOE correlations between H14 and H12.

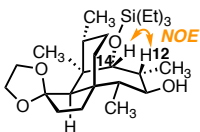

$R_f = 0.25$  (33% ether–hexanes; PAA).  $^1\text{H}$  NMR (600 MHz,  $\text{CDCl}_3$ )  $\delta$  4.34 (d,  $J = 5.0$  Hz, 1H, H<sub>14</sub>), 4.00 (p,  $J = 6.8$  Hz, 1H, H<sub>22a</sub> or H<sub>23a</sub>), 3.87 (tq,  $J = 13.4$ , 6.5 Hz, 2H, H<sub>22b</sub>, H<sub>23b</sub>), 3.76–3.69 (m, 1H, H<sub>22a</sub> or H<sub>23a</sub>), 3.27 (dt,  $J = 11.6$ , 4.6 Hz, 1H, H<sub>11</sub>), 2.09 (ddq,  $J = 32.5$ , 13.2, 6.9 Hz, 2H, H<sub>6</sub>, H<sub>10</sub>), 1.93–1.85 (m, 1H, H<sub>12</sub>), 1.83–1.77 (m, 3H, H<sub>2</sub>, H<sub>4</sub>), 1.57–1.23 (m, 6H, H<sub>1</sub>, H<sub>7</sub>, H<sub>8</sub>), 1.21 (d,  $J = 7.4$  Hz, 3H, H<sub>19</sub>), 1.03 (s, 3H, H<sub>15</sub>), 0.99 (t,  $J = 7.9$  Hz, 9H, H<sub>21</sub>), 0.87 (d,  $J = 6.8$  Hz, 3H, H<sub>17</sub>), 0.82 (d,  $J = 7.0$  Hz, 3H, H<sub>16</sub>), 0.64 (qd,  $J = 7.9$ , 1.5 Hz, 6H, H<sub>20</sub>).  $^{13}\text{C}$  NMR (150 MHz,  $\text{CDCl}_3$ )  $\delta$  119.7 (C), 76.8 (CH), 71.1 (CH), 64.3 (CH<sub>2</sub>), 61.8 (CH<sub>2</sub>), 52.4 (CH), 50.5 (CH), 44.7 (C), 41.7 (C), 37.2 (CH), 36.7 (CH<sub>2</sub>), 36.0 (CH), 29.6 (CH<sub>2</sub>), 28.6 (CH<sub>2</sub>), 28.1 (CH<sub>2</sub>), 17.6 (CH<sub>3</sub>), 17.5 (CH<sub>3</sub>), 14.5 (CH<sub>3</sub>), 13.0 (CH<sub>3</sub>), 7.4 ( $3 \times \text{CH}_3$ ), 5.9 ( $3 \times \text{CH}_2$ ). IR (ATR-FTIR),  $\text{cm}^{-1}$ : 3437 (w), 2953 (s), 2876 (m), 2362 (s), 2341 (m), 1089 (m), 1019 (m), 737 (m). HRMS-ESI ( $m/z$ ):  $[\text{M} + \text{H}]^+$  calcd for  $[\text{C}_{25}\text{H}_{47}\text{O}_4\text{Si}]^+$  439.3244; found 439.3238.  $[\alpha]_D^{20} = -36.2$  ( $c = 0.063$ ,  $\text{CHCl}_3$ ).

Synthesis of the protected alcohol **S48**.

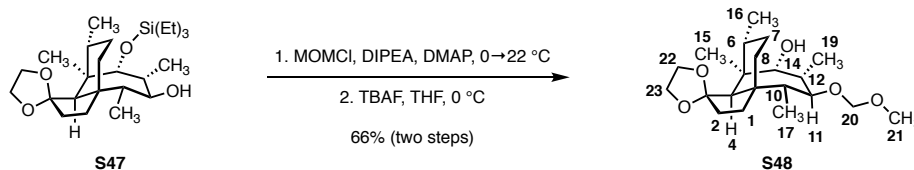

4-Dimethylaminopyridine (1.00 mg, 8.20  $\mu\text{mol}$ , 0.10 equiv) was added to a solution of chloromethyl methyl ether (43.0  $\mu\text{L}$ , 571  $\mu\text{mol}$ , 7.00 equiv), diisopropylethylamine (199  $\mu\text{L}$ , 1.14 mmol, 14.0 equiv), and the alcohol **S47** [35.8 mg, 81.6  $\mu\text{mol}$ , 1 equiv; dried by azeotropic distillation with benzene ( $3 \times 1.0 \text{ mL}$ )] in dichloromethane (270  $\mu\text{L}$ ) at  $0^\circ\text{C}$ . The reaction mixture was allowed to warm to  $22^\circ\text{C}$  over 15 h. The product mixture was diluted sequentially with ether (2.0 mL) and saturated aqueous ammonium chloride solution (1.0 mL). The resulting biphasic mixture was transferred to a separatory funnel and the layers that formed were separated. The aqueous layer was extracted with ether ( $3 \times 2.0 \text{ mL}$ ). The organic layers were combined and the combined organic layers were washed sequentially with water (3.0 mL) and saturated aqueous sodium chloride solution (3.0 mL). The dried solution was filtered and the filtrate was concentrated. The residue obtained was used directly in the following step.

A solution of tetra-*n*-butylammonium fluoride in tetrahydrofuran (1.0 M, 245  $\mu\text{L}$ , 245  $\mu\text{mol}$ , 3.00 equiv) was added dropwise over 2 min to a solution of the unpurified product obtained in the preceding step (nominally 81.6  $\mu\text{mol}$ , 1 equiv) in tetrahydrofuran (400  $\mu\text{L}$ ) at  $0^\circ\text{C}$ . The reaction mixture was stirred for 30 min at  $22^\circ\text{C}$ . The product mixture was diluted sequentially with ether (2.0 mL) and saturated aqueous sodium bicarbonate solution (1.0 mL). The resulting biphasic mixture was transferred to a separatory funnel and the layers that formed were separated. The aqueous layer was extracted with ether ( $3 \times 2.0 \text{ mL}$ ). The organic layers were combined and the combined organic layers were washed sequentially with water (3.0 mL) and saturated aqueous sodium chloride solution (3.0 mL). The dried solution was filtered and the filtrate was concentrated. The residue obtained was purified by flash-column chromatography (eluting with 10% ethyl acetate–hexanes initially, grading to 60% ethyl acetate–hexanes, three steps) to provide the protected product **S48** as a clear oil (20.0 mg, 66% over two steps).

$R_f = 0.38$  (33% ethyl acetate–hexanes; PAA).  $^1\text{H NMR}$  (500 MHz,  $\text{CDCl}_3$ )  $\delta$  4.69 (d,  $J = 6.9 \text{ Hz}$ , 1H,  $\text{H}_{20a}$ ), 4.60 (d,  $J = 6.9 \text{ Hz}$ , 1H,  $\text{H}_{20b}$ ), 4.25 (d,  $J = 4.8 \text{ Hz}$ , 1H,  $\text{H}_{14}$ ), 4.01 (p,  $J = 6.5, 6.0 \text{ Hz}$ , 1H,  $\text{H}_{22a}$  or  $\text{H}_{23a}$ ), 3.88 (tq,  $J = 13.4, 6.4 \text{ Hz}$ , 2H,  $\text{H}_{22b}$ ,  $\text{H}_{23b}$ ), 3.78 – 3.70 (m, 1H,  $\text{H}_{22a}$  or  $\text{H}_{23a}$ ), 3.37 (s, 3H,  $\text{H}_{21}$ ), 3.14 (dd,  $J = 11.8, 4.6 \text{ Hz}$ , 1H,  $\text{H}_{11}$ ), 2.16 (dtt,  $J = 36.4, 12.2, 6.6 \text{ Hz}$ , 3H,  $\text{H}_6$ ,  $\text{H}_{10}$ ,  $\text{H}_{12}$ ), 1.85 – 1.78 (m, 3H,  $\text{H}_2$ ,  $\text{H}_4$ ), 1.61 – 1.27 (m, 6H,  $\text{H}_1$ ,  $\text{H}_7$ ,  $\text{H}_8$ ), 1.24 (d,  $J = 7.5 \text{ Hz}$ , 3H,  $\text{H}_{19}$ ), 1.04 (s, 3H,  $\text{H}_{15}$ ), 0.87 (d,  $J = 7.0 \text{ Hz}$ , 3H,  $\text{H}_{17}$ ), 0.85 (d,  $J = 6.8 \text{ Hz}$ , 3H,  $\text{H}_{16}$ ).  $^{13}\text{C NMR}$  (150 MHz,  $\text{CDCl}_3$ )  $\delta$  119.5 (C), 97.2 ( $\text{CH}_2$ ), 83.6 (CH), 70.3 (CH), 64.2 ( $\text{CH}_2$ ), 61.7 ( $\text{CH}_2$ ), 55.7 (CH), 52.4 (CH), 48.0 (CH), 44.4 (C), 41.0 (C), 37.1 (CH), 36.5 ( $\text{CH}_2$ ), 35.7 (CH), 29.7 ( $\text{CH}_2$ ), 28.2 ( $\text{CH}_2$ ), 27.9 ( $\text{CH}_2$ ), 17.2 ( $\text{CH}_3$ ), 16.9 ( $\text{CH}_3$ ), 13.3 ( $\text{CH}_3$ ), 13.3 ( $\text{CH}_3$ ). IR (ATR-FTIR),  $\text{cm}^{-1}$ : 2960 (m), 2582 (w), 1007 (m), 772 (m). HRMS-ESI ( $m/z$ ):  $[\text{M} + \text{Na}]^+$  calcd for  $[\text{C}_{21}\text{H}_{36}\text{NaO}_5]^+$  391.2460; found 391.2454.  $[\alpha]_D^{20} = -5.06$  ( $c = 0.181$ ,  $\text{CHCl}_3$ ).

Synthesis of the ester **S49**.

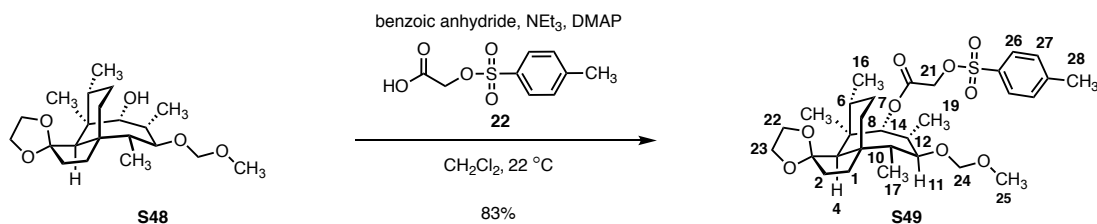

4-Dimethylaminopyridine (300  $\mu\text{g}$ , 2.70  $\mu\text{mol}$ , 0.10 equiv) was added to a solution of the protected glycolic acid **22** (62.5 mg, 271  $\mu\text{mol}$ , 10.0 equiv), benzoic anhydride (61.4 mg, 271  $\mu\text{mol}$ , 10.0 equiv), triethylamine (53.0  $\mu\text{L}$ , 380  $\mu\text{mol}$ , 14.0 equiv), and the alcohol **S48** [10.0 mg, 64.5  $\mu\text{mol}$ , 1 equiv; dried by azeotropic distillation with benzene ( $3 \times 1.0 \text{ mL}$ )] in dichloromethane (200  $\mu\text{L}$ ) at 22 °C. The reaction mixture was stirred for 2 h at 22 °C. The product mixture was diluted sequentially with ether (1.0 mL) and 1 N aqueous sodium hydroxide solution (1.0 mL). The resulting biphasic mixture was transferred to a separatory funnel and the layers that formed were separated. The aqueous layer was extracted with ether ( $4 \times 2.0 \text{ mL}$ ). The organic layers were combined and the combined organic layers were washed with saturated aqueous sodium chloride solution (4.0 mL). The washed organic layer was dried over magnesium sulfate. The dried solution was filtered and the filtrate was concentrated. The residue obtained was purified by flash-column chromatography (eluting with 10% ethyl acetate–hexanes initially, grading to 50% ethyl acetate–hexanes, three steps) to provide the ester **S49** as a white foam (13.1 mg, 83%).

$R_f = 0.41$  (33% ethyl acetate–hexanes; PAA). <sup>1</sup>H NMR (600 MHz, CDCl<sub>3</sub>)  $\delta$  7.83 (d,  $J = 8.4 \text{ Hz}$ , 2H, H<sub>26</sub>), 7.36 (d,  $J = 7.9 \text{ Hz}$ , 2H, H<sub>27</sub>), 5.45 (d,  $J = 5.0 \text{ Hz}$ , 1H, H<sub>14</sub>), 4.63 (t,  $J = 5.3 \text{ Hz}$ , 3H, H<sub>21</sub>, H<sub>24a</sub>), 4.61 – 4.51 (m, 1H, H<sub>24b</sub>), 4.01 (q,  $J = 6.5, 5.9 \text{ Hz}$ , 1H, H<sub>22a</sub> or <sub>23a</sub>), 3.88 (tt,  $J = 13.5, 6.9 \text{ Hz}$ , 2H, H<sub>22b</sub>, H<sub>23b</sub>), 3.79 – 3.70 (m, 1H, H<sub>22a</sub> or <sub>23a</sub>), 3.34 (s, 3H, H<sub>25</sub>), 3.12 (dd,  $J = 11.8, 4.8 \text{ Hz}$ , 1H, H<sub>11</sub>), 2.46 (s, 3H, H<sub>28</sub>), 2.30 – 2.22 (m, 1H, H<sub>10</sub>), 2.14 (ddt,  $J = 42.3, 12.0, 5.4 \text{ Hz}$ , 2H, H<sub>6</sub>, H<sub>12</sub>), 1.91 – 1.76 (m, 3H, H<sub>2</sub>, H<sub>4</sub>), 1.56 – 1.23 (m, 6H, H<sub>1</sub>, H<sub>7</sub>, H<sub>8</sub>), 1.17 (d,  $J = 7.3 \text{ Hz}$ , 3H, H<sub>19</sub>), 1.06 (s, 3H, H<sub>15</sub>), 0.85 (d,  $J = 6.8 \text{ Hz}$ , 3H, H<sub>17</sub>), 0.60 (d,  $J = 7.4 \text{ Hz}$ , 3H, H<sub>16</sub>). <sup>13</sup>C NMR (150 MHz, CDCl<sub>3</sub>)  $\delta$  165.6 (C), 145.6 (C), 132.5 (C), 130.1 (2  $\times$  CH), 128.3 (2  $\times$  CH), 119.3 (C), 97.2 (CH<sub>2</sub>), 83.0 (CH), 74.6 (CH), 64.2 (CH<sub>2</sub>), 61.8 (CH<sub>2</sub>), 61.7 (CH<sub>2</sub>), 55.8 (CH<sub>3</sub>), 51.9 (CH), 44.3 (C), 44.3 (CH), 40.6 (C), 37.2 (CH), 36.4 (CH<sub>2</sub>), 35.6 (CH), 29.6 (CH<sub>2</sub>), 28.1 (CH<sub>2</sub>), 27.6 (CH<sub>2</sub>), 21.9 (CH<sub>3</sub>), 17.7 (CH<sub>3</sub>), 15.9 (CH<sub>3</sub>), 13.8 (CH<sub>3</sub>), 13.2 (CH<sub>3</sub>). IR (ATR-FTIR), cm<sup>-1</sup>: 2924 (m), 1759 (m), 1732 (m), 1372 (m), 1178 (m), 1034 (s). HRMS-ESI (m/z): [M + Na]<sup>+</sup> calcd for [C<sub>30</sub>H<sub>44</sub>NaO<sub>9</sub>S]<sup>+</sup> 603.2604; found 603.2592.  $[\alpha]_D^{20} = -32.3$  ( $c = 0.065$ , CHCl<sub>3</sub>).

### Synthesis of the sulfide **S50**.

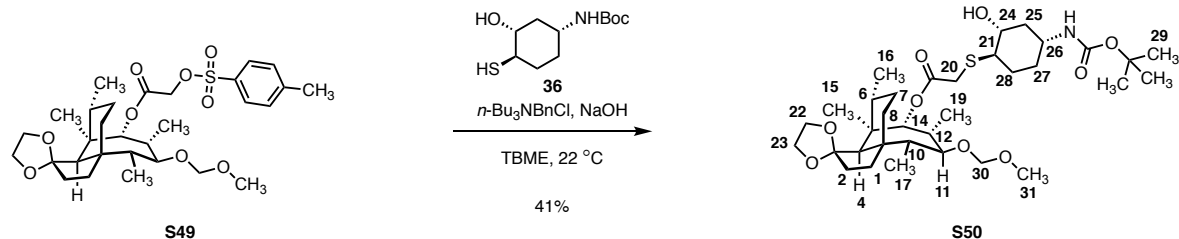

Aqueous sodium hydroxide solution (1 N, 29.0  $\mu\text{L}$ , 29.3  $\mu\text{mol}$ , 1.30 equiv) was added to a solution of the thiol **36** (14.5 mg, 29.3  $\mu\text{mol}$ , 1.30 equiv), benzyl tri-*n*-butylammonium chloride (1.40 mg, 4.50  $\mu\text{mol}$ , 0.20 equiv), and the sulfonate **S49** (13.1 mg, 22.5  $\mu\text{mol}$ , 1 equiv) in *tert*-butyl methyl ether (230  $\mu\text{L}$ ) at 22 °C. The reaction mixture was stirred for 2 h at 22 °C. The product mixture was diluted sequentially with dichloromethane (1.0 mL) and 1 N aqueous sodium hydroxide solution (1.0 mL). The resulting biphasic mixture was transferred to a separatory funnel and the layers that formed were separated. The aqueous layer was extracted with dichloromethane (2  $\times$  1.0 mL). The organic layers were combined and the combined organic layers were washed sequentially with aqueous sodium thiosulfate solution (10% w/v, 1.0 mL), 0.1 N aqueous phosphoric acid solution (1.0 mL), saturated aqueous sodium bicarbonate solution (1.0 mL), and saturated aqueous sodium chloride solution (1.0 mL). The washed organic layer was dried over magnesium sulfate. The dried solution was filtered and the filtrate was concentrated. The residue obtained was purified by flash-column chromatography (eluting with 30% acetone–hexanes initially, grading to 80% acetone–hexanes, three steps) to provide the displacement product **S50** as a white solid (6.00 mg, 41%).

$R_f$  = 0.19 (33% acetone–hexanes; PAA).  $^1\text{H}$  NMR (500 MHz,  $\text{CDCl}_3$ )  $\delta$  5.43 (d,  $J$  = 4.9 Hz, 1H,  $\text{H}_{14}$ ), 4.64 (dd,  $J$  = 7.0, 3.4 Hz, 1H,  $\text{H}_{30a}$ ), 4.57 (dd,  $J$  = 7.0, 3.7 Hz, 1H,  $\text{H}_{30b}$ ), 4.47 (s, 1H, NH), 4.00 (p,  $J$  = 6.3, 5.4 Hz, 1H,  $\text{H}_{22a}$  or  $\text{H}_{23a}$ ), 3.89 (td,  $J$  = 12.7, 11.6, 6.7 Hz, 2H,  $\text{H}_{22b}$ ,  $\text{H}_{23b}$ ), 3.79–3.70 (m, 1H,  $\text{H}_{22a}$  or  $\text{H}_{23a}$ ), 3.52 (s, 1H,  $\text{H}_{26}$ ), 3.47–3.37 (m, 1H,  $\text{H}_{24}$ ), 3.37–3.23 (m, 5H,  $\text{H}_{20}$ ,  $\text{H}_{31}$ ), 3.13 (dd,  $J$  = 11.8, 4.7 Hz, 1H,  $\text{H}_{11}$ ), 2.49 (ddd,  $J$  = 13.3, 9.7, 3.8 Hz, 1H,  $\text{H}_{21}$ ), 2.38–2.23 (m, 2H,  $\text{H}_{10}$ ,  $\text{H}_{25a}$ ), 2.23–1.99 (m, 4H,  $\text{H}_6$ ,  $\text{H}_{12}$ ,  $\text{H}_{27a}$ ,  $\text{H}_{28a}$ ), 1.96–1.77 (m, 3H,  $\text{H}_2$ ,  $\text{H}_4$ ), 1.59–1.40 (m, 13H,  $\text{H}_1$ ,  $\text{H}_{7a}$ ,  $\text{H}_{8a}$ ,  $\text{H}_{29}$ ), 1.38–1.02 (m, 10H,  $\text{H}_{7b}$ ,  $\text{H}_{8b}$ ,  $\text{H}_{15}$ ,  $\text{H}_{19}$ ,  $\text{H}_{25b}$ ,  $\text{H}_{28b}$ ), 0.85 (d,  $J$  = 6.8 Hz, 3H,  $\text{H}_{17}$ ), 0.65 (dd,  $J$  = 16.0, 7.0 Hz, 3H,  $\text{H}_{16}$ ).  $^{13}\text{C}$  NMR (150 MHz,  $\text{CDCl}_3$ )  $\delta$  170.2 (C), 155.2 (C), 119.4 (C), 97.2 ( $\text{CH}_2$ ), 83.1 (CH), 79.6 (C), 74.4 (CH), 71.8 (CH), 64.2 ( $\text{CH}_2$ ), 61.7 ( $\text{CH}_2$ ), 55.8 ( $\text{CH}_3$ ), 52.7 (CH), 52.0 (CH), 47.8 (CH), 44.3 (C), 44.2 (CH), 40.6 (C), 40.5 ( $\text{CH}_2$ ), 37.1 (CH), 36.5 ( $\text{CH}_2$ ), 35.7 (CH), 33.1 ( $\text{CH}_2$ ), 32.9 ( $\text{CH}_2$ ), 29.6 ( $\text{CH}_2$ ), 29.4 ( $\text{CH}_2$ ), 28.5 (3  $\times$   $\text{CH}_3$ ), 28.1 ( $\text{CH}_2$ ), 27.6 ( $\text{CH}_2$ ), 17.9 ( $\text{CH}_3$ ), 16.1 ( $\text{CH}_3$ ), 14.0 ( $\text{CH}_3$ ), 13.2 ( $\text{CH}_3$ ). IR (ATR-FTIR),  $\text{cm}^{-1}$ : HRMS-ESI ( $m/z$ ):  $[\text{M} + \text{Na}]^+$  calcd for  $[\text{C}_{34}\text{H}_{57}\text{NNaO}_9\text{S}]^+$  678.3652; found 678.3648.  $[\alpha]_D^{20} = +27.1$  ( $c$  = 0.031,  $\text{CHCl}_3$ ).

Synthesis of the lefamulin derivative **59**.

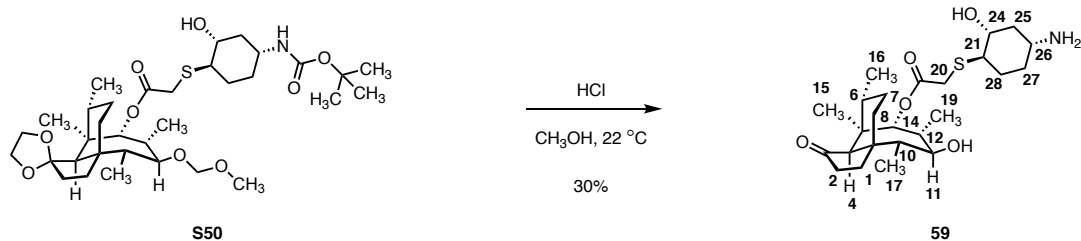

Aqueous hydrochloric acid solution (12 N, 7.50  $\mu\text{L}$ , 91.0  $\mu\text{mol}$ , 10.0 equiv) was added to a solution of the thioglycolic ester **S50** (6.00 mg, 9.10  $\mu\text{mol}$ , 1 equiv) in methanol (200  $\mu\text{L}$ ) at 22  $^\circ\text{C}$ . The reaction mixture was stirred for 72 h at 22  $^\circ\text{C}$ . The product mixture was concentrated to provide the analytically pure analog **59** as a fine, white solid (1.30 mg, 30%). The product obtained in this way was judged to be of >95% purity (600 MHz  $^1\text{H}$  NMR analysis) and was used in susceptibility testing without further purification.

$R_f = 0.05$  (80% acetone–hexanes; PAA).  $^1\text{H}$  NMR (500 MHz,  $\text{CD}_2\text{Cl}_2$ )  $\delta = 5.44$  (d,  $J = 5.0$  Hz, 1H, H<sub>14</sub>), 3.55 – 3.36 (m, 2H, H<sub>20a</sub>, H<sub>24</sub>), 3.29 (td,  $J = 15.4, 14.0, 8.8$  Hz, 2H, H<sub>11</sub>, H<sub>20b</sub>), 2.90 (s, 1H, H<sub>26</sub>), 2.58 (s, 1H, H<sub>21</sub>), 2.30 – 2.05 (m, 3H, H<sub>1</sub>, H<sub>10</sub>), 2.05 – 1.79 (m, 2H, H<sub>4</sub>, H<sub>12</sub>), 1.71 – 1.40 (m, 10H, H<sub>2</sub>, H<sub>6</sub>, H<sub>7</sub>, H<sub>15</sub>, H<sub>27</sub>), 1.35 – 1.06 (m, 9H, H<sub>8</sub>, H<sub>19</sub>, H<sub>25</sub>, H<sub>28</sub>), 0.96 (d,  $J = 6.7$  Hz, 3H, H<sub>17</sub>), 0.68 (d,  $J = 5.8$  Hz, 3H, H<sub>16</sub>).  $^{13}\text{C}$  NMR (125 MHz,  $\text{CD}_2\text{Cl}_2$ )  $\delta$  216.0 (C), 170.6 (C), 76.3 (CH), 72.6 (CH), 71.9 (CH), 58.9 (CH), 56.2 (CH), 48.7 (CH), 46.5 (CH), 44.0 (C), 40.6 (C), 37.9 (CH), 36.9 (CH), 34.9 (CH<sub>2</sub>), 33.4 (CH<sub>2</sub>), 30.1 (CH<sub>2</sub>), 29.9 (CH<sub>2</sub>), 29.9 (CH<sub>2</sub>), 28.3 (CH<sub>2</sub>), 27.7 (CH<sub>2</sub>), 26.4 (CH<sub>2</sub>), 17.8 (CH<sub>3</sub>), 16.1 (CH<sub>3</sub>), 15.0 (CH<sub>3</sub>), 12.4 (CH<sub>3</sub>). IR (ATR-FTIR),  $\text{cm}^{-1}$ : 3728 (w), 2361 (s), 2341 (s), 669 (w). HRMS-ESI ( $m/z$ ):  $[\text{M} + \text{H}]^+$  calcd for  $[\text{C}_{25}\text{H}_{42}\text{NO}_5\text{S}]^+$  468.2784; found 468.2783.  $[\alpha]_D^{20} = +16.0$  ( $c = 0.025$ ,  $\text{CH}_3\text{OH}$ ).



Synthesis of the hydrogenated derivative **S52**.

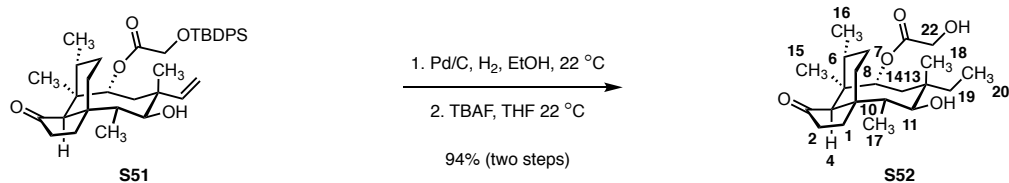

Palladium on carbon (5% w/w, 20.0 mg) was added to a solution of *O*22-[(*tert*-butyldiphenyl)silyl]-12-*epi*-pleuromutilin (**S51**, 400 mg, 648  $\mu\text{mol}$ , 1 equiv) in ethanol (4.1 mL) at 22 °C. The reaction vessel was sparged using a balloon of dihydrogen. The reaction mixture was stirred for 12 h at 22 °C. The product mixture was filtered through a pad of Celite. The Celite pad was rinsed with dichloromethane ( $2 \times 10$  mL). The filtrates were combined and the combined filtrates were concentrated. The residue obtained was used directly in the following step.

A solution of tetra-*n*-butylammonium fluoride in tetrahydrofuran (1.0 M, 840  $\mu\text{L}$ , 840  $\mu\text{mol}$ , 1.30 equiv) was added to a solution of the residue obtained in the preceding step (nominally 648  $\mu\text{mol}$ , 1 equiv) in tetrahydrofuran (6.5 mL) at 22 °C. The reaction mixture was stirred for 15 min at 22 °C. The product mixture was diluted sequentially with ethyl acetate (15 mL), water (10 mL), and saturated aqueous sodium bicarbonate solution (15 mL). The resulting biphasic mixture was transferred to a separatory funnel and the layers that formed were separated. The aqueous layer was extracted with ethyl acetate ( $3 \times 15$  mL). The organic layers were combined and the combined organic layers were washed sequentially with water (10 mL) and saturated aqueous sodium chloride solution (10 mL). The washed organic layer was dried over magnesium sulfate. The dried solution was filtered and the filtrate was concentrated. The residue obtained was purified by flash-column chromatography (eluting with 30% ethyl acetate–hexanes) to provide the hydrogenated product **S52** as an amorphous white solid (230 mg, 94% over two steps).

$R_f = 0.30$  (50% ethyl acetate–hexanes; PAA).  $^1\text{H NMR}$  (600 MHz,  $\text{CDCl}_3$ )  $\delta$  5.70 (d,  $J = 8.3$  Hz, 1H,  $\text{H}_{14}$ ), 4.06 (d,  $J = 17.0$  Hz, 1H,  $\text{H}_{22a}$ ), 3.99 (d,  $J = 17.0$  Hz, 1H,  $\text{H}_{22b}$ ), 3.40 (d,  $J = 6.1$  Hz, 1H,  $\text{H}_{11}$ ), 2.39 (p,  $J = 7.0$  Hz, 1H,  $\text{H}_{10}$ ), 2.28 – 2.12 (m, 2H,  $\text{H}_2$ ), 2.09 (s, 1H,  $\text{H}_4$ ), 1.81 – 1.68 (m, 3H,  $\text{H}_{8a}$ ,  $\text{H}_{13a}$ ,  $\text{H}_{19a}$ ), 1.68 – 1.41 (m, 5H,  $\text{H}_1$ ,  $\text{H}_6$ ,  $\text{H}_{7a}$ ,  $\text{H}_{19b}$ ), 1.41 – 1.28 (m, 5H,  $\text{H}_{7b}$ ,  $\text{H}_{13b}$ ,  $\text{H}_{18}$ ), 1.11 (td,  $J = 14.0$ , 4.4 Hz, 1H,  $\text{H}_{8b}$ ), 0.98 – 0.91 (m, 6H,  $\text{H}_{15}$ ,  $\text{H}_{17}$ ), 0.74 (t,  $J = 7.4$  Hz, 3H,  $\text{H}_{20}$ ), 0.66 (d,  $J = 7.0$  Hz, 3H,  $\text{H}_{16}$ ).  $^{13}\text{C NMR}$  (150 MHz,  $\text{CDCl}_3$ )  $\delta$  217.0 (C), 172.3 (C), 76.4 (CH), 70.1 (CH), 61.3 ( $\text{CH}_2$ ), 58.4 (CH), 45.5 (C), 41.8 (C), 41.0 ( $\text{CH}_2$ ), 40.9 (C), 36.5 (CH), 34.4 ( $\text{CH}_2$ ), 34.3 (CH), 30.2 ( $\text{CH}_2$ ), 26.8 ( $\text{CH}_2$ ), 26.3 ( $\text{CH}_3$ ), 24.9 ( $\text{CH}_2$ ), 20.6 ( $\text{CH}_2$ ), 16.4 ( $\text{CH}_3$ ), 14.7 ( $\text{CH}_3$ ), 11.1 ( $\text{CH}_3$ ), 8.2 ( $\text{CH}_3$ ). IR (ATR-FTIR),  $\text{cm}^{-1}$ : 3460 (w), 2961 (m), 1731 (s), 1221 (m), 1099 (m), 756 (w). HRMS-ESI ( $m/z$ ):  $[\text{M} + \text{H}]^+$  calcd for  $[\text{C}_{22}\text{H}_{37}\text{O}_5]^+$  381.2641; found 381.2636.  $[\alpha]_D^{20} = +11.9$  ( $c = 0.850$ ,  $\text{CHCl}_3$ ).

### Synthesis of the sulfonate **S53**.

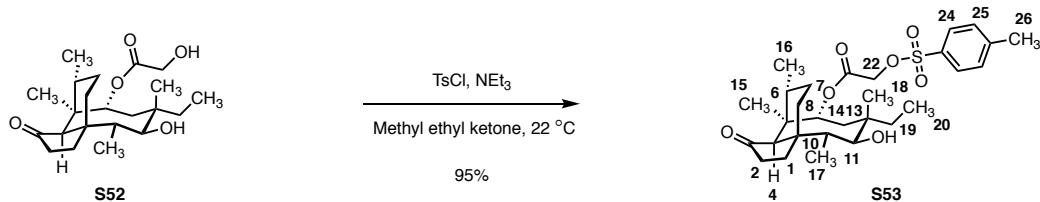

4-Toluenesulfonyl chloride (48.6 mg, 255  $\mu\text{mol}$ , 1.00 equiv) was added to a solution of triethylamine (39.0  $\mu\text{L}$ , 280  $\mu\text{mol}$ , 1.10 equiv) and the glycolic ester **S52** (97.0 mg, 255  $\mu\text{mol}$ , 1 equiv) in methyl ethyl ketone (2.0 mL) at 22  $^\circ\text{C}$ . The reaction mixture was stirred for 24 h at 22  $^\circ\text{C}$ . The product mixture was diluted sequentially with ethyl acetate (10 mL), water (5.0 mL) and saturated aqueous ammonium chloride solution (5.0 mL). The resulting biphasic mixture was transferred to a separatory funnel and the layers that formed were separated. The aqueous layer was extracted with ethyl acetate (2  $\times$  10 mL). The organic layers were combined and the combined organic layers were washed sequentially with water (10 mL) and saturated aqueous sodium chloride solution (10 mL). The washed organic layer was dried over magnesium sulfate. The dried solution was filtered and the filtrate was concentrated. The residue obtained was purified by flash-column chromatography (eluting with 5% ethyl acetate–hexanes initially, grading to 30% ethyl acetate–hexanes, three steps) to provide the sulfonate **S53** as an amorphous white solid (130 mg, 95%).

$R_f = 0.31$  (50% ethyl acetate–hexanes; PAA).  $^1\text{H NMR}$  (600 MHz,  $\text{CDCl}_3$ )  $\delta$  7.82 (d,  $J = 8.4$  Hz, 2H,  $\text{H}_{24}$ ), 7.35 (d,  $J = 8.0$  Hz, 2H,  $\text{H}_{25}$ ), 5.60 (d,  $J = 8.6$  Hz, 1H,  $\text{H}_{14}$ ), 4.48 (s, 2H,  $\text{H}_{22}$ ), 3.49 (d,  $J = 6.2$  Hz, 1H,  $\text{H}_{11}$ ), 2.45 (s, 3H,  $\text{H}_{26}$ ), 2.34 – 2.14 (m, 3H,  $\text{H}_2$ ,  $\text{H}_{10}$ ), 2.06 – 1.97 (m, 2H,  $\text{H}_4$ ,  $\text{H}_{13a}$ ), 1.75 (dd,  $J = 14.6, 3.2$  Hz, 1H,  $\text{H}_{8a}$ ), 1.64 – 1.43 (m, 5H,  $\text{H}_1$ ,  $\text{H}_6$ ,  $\text{H}_{7a}$ ,  $\text{H}_{19a}$ ), 1.41 – 1.23 (m, 5H,  $\text{H}_{7b}$ ,  $\text{H}_{18}$ ,  $\text{H}_{19b}$ ), 1.10 (td,  $J = 14.1, 4.3$  Hz, 1H,  $\text{H}_{8b}$ ), 0.98 (s, 3H,  $\text{H}_{15}$ ), 0.96 – 0.90 (m, 4H,  $\text{H}_{13b}$ ,  $\text{H}_{17}$ ), 0.86 (t,  $J = 7.5$  Hz, 3H,  $\text{H}_{20}$ ), 0.61 (d,  $J = 7.1$  Hz, 3H,  $\text{H}_{16}$ ).  $^{13}\text{C NMR}$  (150 MHz,  $\text{CDCl}_3$ )  $\delta$  217.1 (C), 165.0 (C), 145.5 (C), 132.8 (C), 130.1 (2  $\times$  CH), 128.3 (2  $\times$  CH), 72.0 (CH), 71.1 (CH), 65.2 ( $\text{CH}_2$ ), 58.2 ( $\text{CH}_2$ ), 45.5 (C), 42.0 (C), 41.6 ( $\text{CH}_2$ ), 40.4 (C), 36.7 (CH), 34.8 (CH), 34.6 ( $\text{CH}_2$ ), 34.6 ( $\text{CH}_2$ ), 30.4 ( $\text{CH}_2$ ), 26.9 ( $\text{CH}_2$ ), 25.1 ( $\text{CH}_2$ ), 21.8 ( $\text{CH}_3$ ), 17.7 ( $\text{CH}_3$ ), 16.8 ( $\text{CH}_3$ ), 15.0 ( $\text{CH}_3$ ), 11.1 ( $\text{CH}_3$ ), 8.0 ( $\text{CH}_3$ ). IR (ATR-FTIR),  $\text{cm}^{-1}$ : 3568 (w), 2957 (m), 2365 (w), 1732 (s), 1371 (m), 1176 (s), 1042 (m), 760 (w). HRMS-ESI ( $m/z$ ):  $[\text{M} + \text{Na}]^+$  calcd for  $[\text{C}_{29}\text{H}_{42}\text{NaO}_7\text{S}]^+$  557.2549; found 557.2541.  $[\alpha]_D^{20} = +4.48$  ( $c = 0.530$ ,  $\text{CHCl}_3$ ).

## Synthesis of the lefamulin derivative **60**.

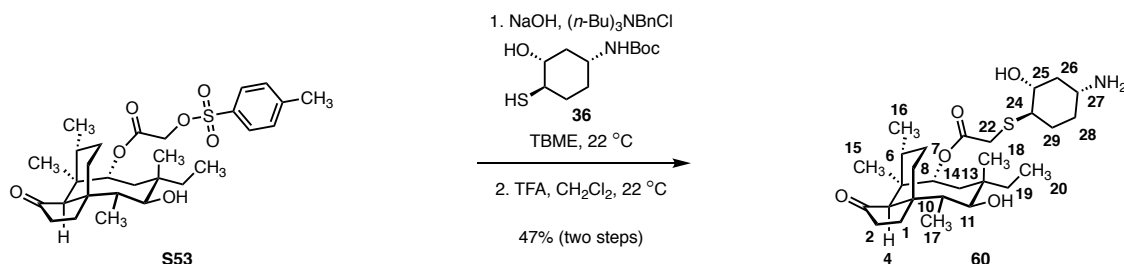

Aqueous sodium hydroxide solution (1 N, 49.0  $\mu$ L, 48.6  $\mu$ mol, 1.30 equiv) was added to a solution of the thiol **36** (12.0 mg, 48.6  $\mu$ mol, 1.30 equiv), benzyl tri-*n*-butylammonium chloride (2.30 mg, 7.50  $\mu$ mol, 0.20 equiv), and the sulfonate **S53** (20.0 mg, 37.4  $\mu$ mol, 1 equiv) in *tert*-butyl methyl ether (410  $\mu$ L) at 22 °C. The reaction mixture was stirred for 5 h at 22 °C. The product mixture was diluted sequentially with ethyl acetate (3.0 mL) and 1 N aqueous sodium hydroxide solution (1.0 mL). The resulting biphasic mixture was transferred to a separatory funnel and the layers that formed were separated. The aqueous layer was extracted with ethyl acetate (3  $\times$  2.0 mL). The organic layers were combined and the combined organic layers were washed sequentially with 0.1 N aqueous phosphoric acid solution (3.0 mL), saturated aqueous sodium bicarbonate solution (3.0 mL), and saturated aqueous sodium chloride solution (3.0 mL). The washed organic layer was dried over magnesium sulfate. The dried solution was filtered and the filtrate was concentrated. The residue obtained was eluted over a plug of silica gel (1.0 cm  $\times$  1.0 cm, eluting with 80% ethyl acetate–hexanes). The filtrates were combined and the combined filtrates were concentrated. The residue obtained was used directly in the following step.

Trifluoroacetic acid (40.0  $\mu$ L, 525  $\mu$ mol, 16.0 equiv) was added to a solution of the thioglycolic ester obtained in the preceding step (nominally 37.4  $\mu$ mol, 1 equiv) in dichloromethane (330  $\mu$ L) at 22 °C. The reaction mixture was stirred for 4 h at 22 °C. The product mixture was concentrated to provide the analytically lefamulin derivative **60** as a fine, white solid (8.90 mg, 47% over two steps). The product obtained in this way was judged to be of >95% purity (600 MHz <sup>1</sup>H NMR analysis) and was used in susceptibility testing without further purification.

$R_f$  = 0.05 (95% ethyl acetate–hexanes; PAA). <sup>1</sup>H NMR (600 MHz, CD<sub>2</sub>Cl<sub>2</sub>)  $\delta$  5.58 (d,  $J$  = 8.6 Hz, 1H, H<sub>14</sub>), 3.51 (d,  $J$  = 6.2 Hz, 1H, H<sub>11</sub>), 3.43 (ddd,  $J$  = 12.9, 7.7, 3.6 Hz, 1H, H<sub>25</sub>), 3.31 (d,  $J$  = 15.7 Hz, 1H, H<sub>22a</sub>), 3.21 (d,  $J$  = 15.6 Hz, 1H, H<sub>22b</sub>), 2.92 (d,  $J$  = 11.1 Hz, 2H, H<sub>27</sub>, NH), 2.61 – 2.52 (m, 1H, H<sub>24</sub>), 2.34 (p,  $J$  = 6.9 Hz, 1H, H<sub>10</sub>), 2.28 – 2.04 (m, 6H, H<sub>2</sub>, H<sub>4</sub>, H<sub>13a</sub>, H<sub>26a</sub>, H<sub>29a</sub>), 1.94 – 1.86 (m, 1H, H<sub>28a</sub>), 1.78 (dq,  $J$  = 14.5, 3.2 Hz, 1H, H<sub>8a</sub>), 1.65 – 1.40 (m, 10H, H<sub>1</sub>, H<sub>6</sub>, H<sub>7a</sub>, H<sub>18</sub>, H<sub>19a</sub>, H<sub>29b</sub>), 1.39 – 1.22 (m, 4H, H<sub>7b</sub>, H<sub>19b</sub>, H<sub>26b</sub>, H<sub>28b</sub>), 1.19 – 1.08 (m, 1H, H<sub>8b</sub>), 1.00 (s, 3H, H<sub>15</sub>), 0.93 (d,  $J$  = 7.1 Hz, 3H, H<sub>17</sub>), 0.87 (t,  $J$  = 7.5 Hz, 3H, H<sub>20</sub>), 0.71 (d,  $J$  = 6.9 Hz, 3H, H<sub>16</sub>). <sup>13</sup>C NMR (150 MHz, CD<sub>2</sub>Cl<sub>2</sub>)  $\delta$  216.9 (C), 169.9 (C), 71.7 (CH), 71.1 (CH), 70.5 (CH), 57.9 (CH), 51.9 (CH), 48.3 (CH), 45.4 (C), 41.8 (C), 41.5 (CH<sub>2</sub>), 40.8 (CH<sub>2</sub>), 40.1 (C), 36.8 (CH), 34.7 (CH), 34.5 (CH<sub>2</sub>), 34.4 (CH<sub>2</sub>), 33.3 (broad, CH<sub>2</sub>), 33.3 (CH<sub>2</sub>), 30.2 (CH<sub>2</sub>), 27.9 (CH<sub>2</sub>), 26.9 (CH<sub>2</sub>), 24.9 (CH<sub>2</sub>), 17.4 (CH<sub>3</sub>), 16.7 (CH<sub>3</sub>), 14.6 (CH<sub>3</sub>), 10.7 (CH<sub>3</sub>), 7.6 (CH<sub>3</sub>). IR (ATR-FTIR), cm<sup>-1</sup>: 3436 (w), 2940 (m), 1694 (s), 1282 (m), 1167 (m), 754 (s). HRMS-ESI (m/z): [M + H]<sup>+</sup> calcd for [C<sub>28</sub>H<sub>48</sub>NO<sub>5</sub>S]<sup>+</sup> 510.3253; found 510.3248.

### Synthesis of the aminoamide **61**.

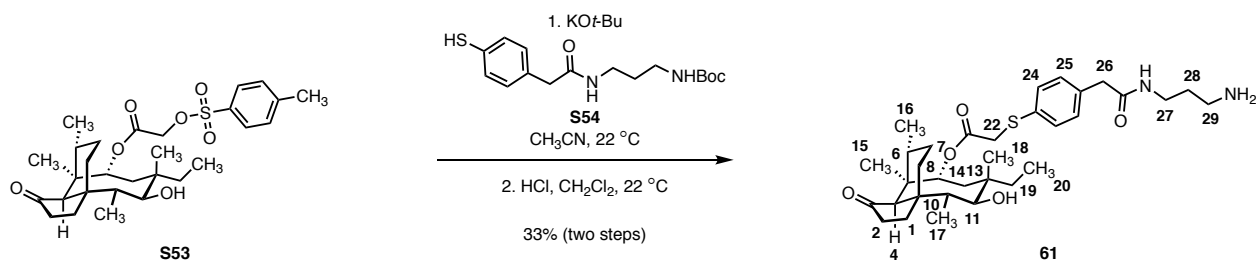

A solution of potassium *tert*-butoxide solution in tetrahydrofuran (50.0 mM, 33.0  $\mu$ L, 16.7  $\mu$ mol, 0.80 equiv) was added dropwise to a solution of the was added to a solution of the thiol **S54** (5.40 mg, 16.7  $\mu$ mol, 0.80 equiv), and the sulfonate **S53** (11.1 mg, 20.8  $\mu$ mol, 1 equiv) in acetonitrile (200  $\mu$ L) at 22 °C. The reaction mixture was stirred for 2 h at 22 °C. The product mixture was diluted sequentially with dichloromethane (1.0 mL) and 1 N aqueous sodium hydroxide solution (1.0 mL). The resulting biphasic mixture was transferred to a separatory funnel and the layers that formed were separated. The aqueous layer was extracted with ethyl acetate (2  $\times$  1.0 mL). The organic layers were combined and the combined organic layers were washed sequentially with aqueous sodium thiosulfate solution (10% w/v, 1.0 mL), saturated aqueous sodium bicarbonate solution (1.0 mL), and saturated aqueous sodium chloride solution (1.0 mL). The washed organic layer was dried over magnesium sulfate. The dried solution was filtered and the filtrate was concentrated. The residue obtained was eluted over a plug of silica gel (1.0 cm  $\times$  1.0 cm, eluting with 85% ethyl acetate–hexanes). The filtrates were combined and the combined filtrates were concentrated. The residue obtained was used directly in the following step.

A solution of hydrogen chloride in dioxane (4.0 M, 83.0  $\mu$ L, 333  $\mu$ mol, 16.0 equiv) was added to a solution of the unpurified ester obtained in the preceding step (nominally 20.8  $\mu$ mol, 1 equiv) in dichloromethane (190  $\mu$ L) at 22 °C. The reaction mixture was stirred for 4 h at 22 °C. The product mixture was concentrated to provide the aminoamide **61** as a fine, white solid (4.30 mg, 33% over two steps). The product obtained in this way was judged to be of >95% purity (600 MHz <sup>1</sup>H NMR analysis) and was used in susceptibility testing without further purification.

$R_f$  = 0.05 (95% ethyl acetate–hexanes; PAA). <sup>1</sup>H NMR (600 MHz, CD<sub>3</sub>OD)  $\delta$  7.36 (d,  $J$  = 7.8 Hz, 2H, H<sub>25</sub>), 7.26 (d,  $J$  = 7.9 Hz, 2H, H<sub>24</sub>), 5.57 (d,  $J$  = 8.4 Hz, 1H, H<sub>14</sub>), 3.68 (d,  $J$  = 15.3 Hz, 1H, H<sub>22a</sub>), 3.61 (d,  $J$  = 15.3 Hz, 1H, H<sub>22b</sub>), 3.48 (d,  $J$  = 9.7 Hz, 3H, H<sub>11</sub>, H<sub>26</sub>), 3.28 (m, 2H, H<sub>27</sub>), 2.88 (t,  $J$  = 7.2 Hz, 2H, H<sub>29</sub>), 2.26 (dq,  $J$  = 17.3, 10.7, 8.4 Hz, 2H, H<sub>2a</sub>, H<sub>10</sub>), 2.14 (q,  $J$  = 9.8, 9.0 Hz, 2H, H<sub>2b</sub>, H<sub>4</sub>), 1.99 (dd,  $J$  = 15.7, 8.4 Hz, 1H, H<sub>13a</sub>), 1.81 (dt,  $J$  = 19.5, 9.8 Hz, 3H, H<sub>8a</sub>, H<sub>28</sub>), 1.73 – 1.64 (m, 1H, H<sub>1a</sub>), 1.63 – 1.40 (m, 4H, H<sub>1b</sub>, H<sub>6</sub>, H<sub>7a</sub>, H<sub>19a</sub>), 1.38 – 1.20 (m, 5H, H<sub>7b</sub>, H<sub>18</sub>, H<sub>19b</sub>), 1.12 (td,  $J$  = 13.9, 4.2 Hz, 1H, H<sub>8b</sub>), 0.91 (d,  $J$  = 6.9 Hz, 3H, H<sub>17</sub>), 0.87 (s, 3H, H<sub>15</sub>), 0.84 – 0.79 (m, 4H, H<sub>13b</sub>, H<sub>20</sub>), 0.67 (d,  $J$  = 6.9 Hz, 3H, H<sub>16</sub>). <sup>13</sup>C NMR (150 MHz, CD<sub>3</sub>OD)  $\delta$  219.6 (C), 174.7 (C), 170.1 (C), 135.6 (C), 135.2 (C), 130.9 (2  $\times$  CH), 130.8 (2  $\times$  CH), 72.4 (CH), 71.7 (CH), 59.1 (CH), 46.7 (C), 43.2 (CH<sub>2</sub>), 43.0 (CH<sub>2</sub>), 42.8 (C), 41.1 (C), 38.2 (CH<sub>2</sub>), 38.1 (CH), 37.5 (CH<sub>2</sub>), 37.0 (CH<sub>2</sub>), 36.4 (CH), 35.6 (CH<sub>2</sub>), 35.3 (CH<sub>2</sub>), 31.5 (CH<sub>2</sub>), 28.8 (CH<sub>2</sub>), 28.1 (CH<sub>2</sub>), 25.8 (CH<sub>2</sub>), 18.2 (CH<sub>3</sub>), 17.3 (CH<sub>3</sub>), 15.5 (CH<sub>3</sub>), 11.6 (CH<sub>3</sub>), 8.2 (CH<sub>3</sub>). IR (ATR-FTIR), cm<sup>-1</sup>: 2952 (w), 2360 (s), 2341 (m), 1729 (w), 1523 (w), 1277 (w), 1169 (w), 669 (w). HRMS-ESI (m/z): [M + H]<sup>+</sup> calcd for [C<sub>33</sub>H<sub>51</sub>N<sub>2</sub>O<sub>5</sub>S]<sup>+</sup> 587.3519; found 587.3515.

Synthesis of the pyridyl sulfide **62**.

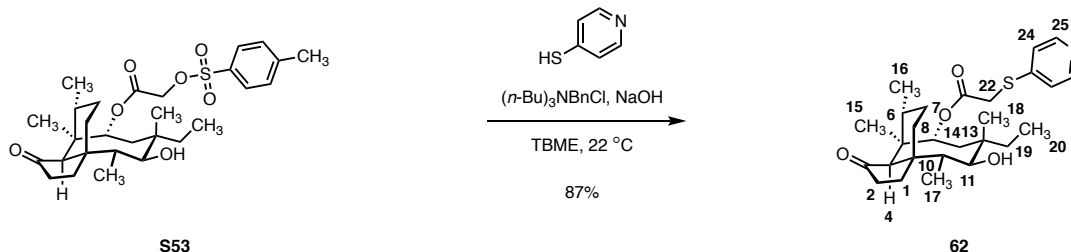

Aqueous sodium hydroxide solution (1 N, 49.0  $\mu\text{L}$ , 48.6  $\mu\text{mol}$ , 1.30 equiv) was added to a solution of 4-mercaptopyridine (5.40 mg, 48.6  $\mu\text{mol}$ , 1.30 equiv), benzyl tri-*n*-butylammonium chloride (2.30 mg, 7.50  $\mu\text{mol}$ , 0.20 equiv), and the sulfonate **S53** (20.0 mg, 37.4  $\mu\text{mol}$ , 1 equiv) in *tert*-butyl methyl ether (370  $\mu\text{L}$ ) at 22 °C. The reaction mixture was stirred for 5 h at 22 °C. The product mixture was diluted sequentially with ethyl acetate (3.0 mL) and 1 N aqueous sodium hydroxide solution (1.0 mL). The resulting biphasic mixture was transferred to a separatory funnel and the layers that formed were separated. The aqueous layer was extracted with ethyl acetate (3  $\times$  2.0 mL). The organic layers were combined and the combined organic layers were washed sequentially with 0.1 N aqueous phosphoric acid solution (3.0 mL), saturated aqueous sodium bicarbonate solution (3.0 mL), and saturated aqueous sodium chloride solution (3.0 mL). The washed organic layer was dried over magnesium sulfate. The dried solution was filtered and the filtrate was concentrated. The residue obtained was purified by flash-column chromatography (eluting with 50% ethyl acetate–hexanes initially, grading to 80% ethyl acetate–hexanes, three steps) to provide the pyridyl sulfide **62** as a white solid (15.3 mg, 87%).

$R_f = 0.15$  (75% ethyl acetate–hexanes; PAA).  $^1\text{H NMR}$  (600 MHz,  $\text{CDCl}_3$ )  $\delta$  8.41 (s, 2H, H<sub>25</sub>), 7.17 (d,  $J = 5.2$  Hz, 2H, H<sub>24</sub>), 5.58 (d,  $J = 8.5$  Hz, 1H, H<sub>14</sub>), 3.70 – 3.62 (m, 2H, H<sub>22</sub>), 3.45 (d,  $J = 6.2$  Hz, 1H, H<sub>11</sub>), 2.29 (t,  $J = 6.9$  Hz, 1H, H<sub>10</sub>), 2.25 – 2.13 (m, 2H, H<sub>2</sub>), 2.02 – 1.95 (m, 2H, H<sub>4</sub>, H<sub>13a</sub>), 1.75 (dq,  $J = 14.6, 3.2$  Hz, 1H, H<sub>8a</sub>), 1.68 – 1.54 (m, 2H, H<sub>1a</sub>, H<sub>6</sub>), 1.53 – 1.39 (m, 6H, H<sub>1b</sub>, H<sub>7a</sub>, H<sub>18</sub>, H<sub>19a</sub>), 1.34 (dq,  $J = 14.5, 3.7$  Hz, 1H, H<sub>7b</sub>), 1.30 – 1.17 (m, 1H, H<sub>19b</sub>), 1.10 (td,  $J = 14.1, 4.4$  Hz, 1H, H<sub>8b</sub>), 0.93 – 0.88 (m, 6H, H<sub>15</sub>, H<sub>17</sub>), 0.85 (d,  $J = 15.9$  Hz, 1H, H<sub>13b</sub>), 0.79 (t,  $J = 7.5$  Hz, 3H, H<sub>20</sub>), 0.69 (d,  $J = 7.1$  Hz, 3H, H<sub>16</sub>).  $^{13}\text{C NMR}$  (150 MHz,  $\text{CDCl}_3$ )  $\delta$  216.9 (C), 167.1 (C), 149.0 (2  $\times$  CH), 147.9 (C), 120.8 (2  $\times$  CH), 72.0 (CH), 71.1 (CH), 58.0 (CH), 45.4 (C), 41.8 (C), 41.7 (CH<sub>2</sub>), 40.1 (C), 36.6 (CH), 34.7 (CH), 34.5 (CH<sub>2</sub>), 34.4 (CH<sub>2</sub>), 34.0 (CH<sub>2</sub>), 30.2 (CH<sub>2</sub>), 26.8 (CH<sub>2</sub>), 25.0 (CH<sub>2</sub>), 17.4 (CH<sub>3</sub>), 16.9 (CH<sub>3</sub>), 14.9 (CH<sub>3</sub>), 10.9 (CH<sub>3</sub>), 7.8 (CH<sub>3</sub>). IR (ATR-FTIR),  $\text{cm}^{-1}$ : 3422 (w), 2956 (m), 2362 (m), 1727 (s), 1580 (m), 1276 (m), 1116 (m), 755 (w). HRMS-ESI ( $m/z$ ):  $[\text{M} + \text{H}]^+$  calcd for  $[\text{C}_{27}\text{H}_{40}\text{NO}_4\text{S}]^+$  474.2678; found 474.2677.  $[\alpha]_D^{20} = +10.1$  ( $c = 0.975$ ,  $\text{CHCl}_3$ ).

### Synthesis of the lactol **S55**.

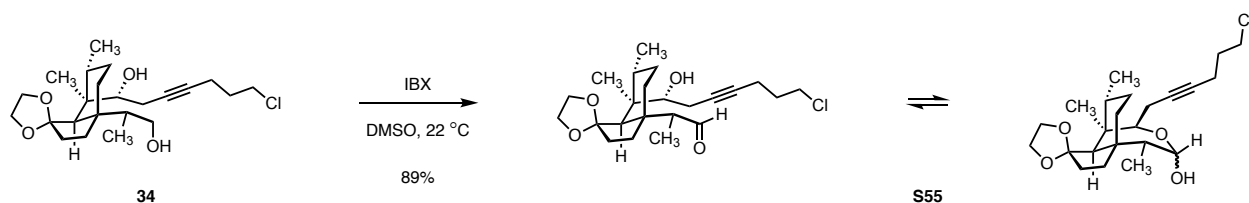

2-Iodoxybenzoic acid (199 mg, 674  $\mu\text{mol}$ , 1.05 equiv) was added in one portion to a solution of the homopropargyl alcohol **34** (265 mg, 642  $\mu\text{mol}$ , 1 equiv) in dimethylsulfoxide (8.2 mL) at 22 °C. The reaction mixture was stirred for 3 h at 22 °C. The product mixture was diluted sequentially with ether (20 mL), saturated aqueous sodium bicarbonate solution (10 mL), and saturated aqueous sodium thiosulfate solution (10 mL) at 22 °C. The resulting biphasic mixture was stirred vigorously for 30 min at 22 °C. The stirred biphasic mixture was transferred to a separatory funnel and the layers that formed were separated. The aqueous layer was extracted with ether ( $3 \times 20$  mL). The organic layers were combined and the combined organic layers were washed with saturated aqueous sodium chloride solution (50 mL). The washed organic layer was dried over magnesium sulfate. The dried solution was filtered and the filtrate was concentrated. The residue obtained was purified by flash-column chromatography (eluting with 5% ethyl acetate–hexanes initially, grading to 20% ethyl acetate–hexanes, three steps) to provide the product **S55** as a white foam (229 mg, 89%). The product **S55** was used immediately in the following step.

$^1\text{H}$  NMR analysis (400 MHz) of the purified product mixture indicated the presence of a 1:1 mixture of hydroxyaldehyde and hemiketal.

Synthesis of the allylic silyl ether **S56**.

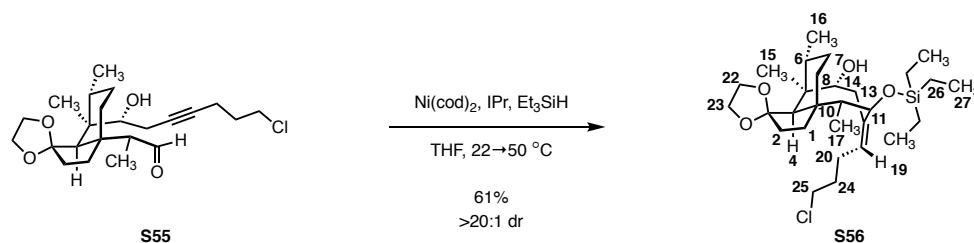

A solution of bis(cyclooctadiene)nickel(0) (10.3 mg, 34.1  $\mu\text{mol}$ , 1.00 equiv) and 1,3-bis(2,6-diisopropylphenyl)imidazol-2-ylidene (IPr, 13.2 mg, 34.1  $\mu\text{mol}$ , 1.00 equiv) in tetrahydrofuran (300  $\mu\text{L}$ ) was stirred for 30 min at 22 °C in a nitrogen-filled glovebox. A portion of this solution (60.0  $\mu\text{L}$ , 6.82  $\mu\text{mol}$ , 0.20 equiv of nickel and ligand) was added to a solution of triethylsilane (16.3  $\mu\text{L}$ , 102  $\mu\text{mol}$ , 3.00 equiv) and the alkynyl aldehyde **S55** (14.0 mg, 34.1  $\mu\text{mol}$ , 1 equiv) in tetrahydrofuran (1.1 mL) in a round-bottomed flask fused to a Teflon-coated valve at 22 °C in a nitrogen-filled glovebox. The reaction vessel was sealed and the sealed reaction vessel was removed from the glovebox. The sealed vessel was placed in an oil bath that had been preheated to 50 °C. The reaction mixture was stirred for 3 h at 50 °C. The product mixture was cooled to 22 °C over 20 min. The cooled product mixture was eluted over a short pad of silica gel (2.0 cm  $\times$  2.0 cm, eluting with 30% ether–hexanes). The filtrates were combined and the combined filtrates were concentrated. The residue obtained was purified by flash-column chromatography (eluting with 5% ether–hexanes initially, grading to 30% ether–hexanes, three steps) to provide the allylic silyl ether **S56** as a clear oil (11.0 mg, 61%).

Within the limits of detection (600 MHz,  $^1\text{H}$  NMR analysis), the allylic silyl ether **S56** was formed as a single diastereomer. The relative stereochemistry was assigned by comparison of  $^3J_{\text{H-H}}$  coupling constants to the allylic silyl ether **S6**.

$R_f = 0.73$  (30% ether–hexanes; PAA).  $^1\text{H}$  NMR (600 MHz,  $\text{CDCl}_3$ )  $\delta$  5.17 (t,  $J = 7.1$  Hz, 1H,  $\text{H}_{19}$ ), 4.78 (dt,  $J = 11.1, 5.2$  Hz, 1H,  $\text{H}_{14}$ ), 3.97 (dt,  $J = 8.9, 6.0$  Hz, 1H,  $\text{H}_{22a}$  or  $\text{H}_{23a}$ ), 3.90 (d,  $J = 8.6$  Hz, 1H,  $\text{H}_{11}$ ), 3.87–3.78 (m, 2H,  $\text{H}_{22b}, \text{H}_{23b}$ ), 3.66 (ddd,  $J = 7.9, 5.7, 2.1$  Hz, 1H,  $\text{H}_{22a}$  or  $\text{H}_{23a}$ ), 3.56 (tdd,  $J = 6.8, 4.2, 2.1$  Hz, 2H,  $\text{H}_{25}$ ), 3.12 (s, 1H,  $\text{H}_4$ ), 2.69–2.54 (m, 1H,  $\text{H}_{13a}$ ), 2.38 (d,  $J = 15.0$  Hz, 1H,  $\text{H}_{13b}$ ), 2.30–2.13 (m, 4H,  $\text{H}_6, \text{H}_{10}, \text{H}_{20}$ ), 1.97–1.87 (m, 2H,  $\text{H}_{24}$ ), 1.75 (dddd,  $J = 13.5, 11.1, 9.0, 2.0$  Hz, 1H,  $\text{H}_{2a}$ ), 1.69–1.62 (m, 1H,  $\text{H}_{2b}$ ), 1.62–1.39 (m, 4H,  $\text{H}_7, \text{H}_8$ ), 1.38–1.30 (m, 1H,  $\text{H}_{1a}$ ), 1.29–1.20 (m, 1H,  $\text{H}_{1b}$ ), 1.04–0.99 (m, 6H,  $\text{H}_{15}, \text{H}_{16}$  or  $\text{H}_{17}$ ), 0.97–0.88 (m, 12H,  $\text{H}_{16}$  or  $\text{H}_{17}, \text{H}_{27}$ ), 0.55 (qd,  $J = 8.1, 1.6$  Hz, 6H,  $\text{H}_{26}$ ).  $^{13}\text{C}$  NMR (150 MHz,  $\text{CDCl}_3$ )  $\delta$  142.9 (C), 125.0 (CH), 119.8 (C), 84.9 (CH), 69.0 (CH), 63.7 (CH<sub>2</sub>), 61.3 (CH<sub>2</sub>), 50.7 (CH), 45.6 (C), 45.0 (CH<sub>2</sub>), 43.2 (C), 42.1 (CH), 36.0 (CH<sub>2</sub>), 36.0 (CH), 33.9 (CH<sub>2</sub>), 31.6 (CH<sub>2</sub>), 28.9 (CH<sub>2</sub>), 28.5 (CH<sub>2</sub>), 27.8 (CH<sub>2</sub>), 25.2 (CH<sub>2</sub>), 18.6 (CH<sub>3</sub>), 15.9 (CH<sub>3</sub>), 14.1 (CH<sub>3</sub>), 7.0 (3  $\times$  CH<sub>3</sub>), 5.2 (3  $\times$  CH<sub>2</sub>). IR(ATR-FTIR),  $\text{cm}^{-1}$ : 2953 (s), 2875 (s), 1036 (m). HRMS-ESI ( $m/z$ ):  $[\text{M} + \text{H}]^+$  calcd for  $[\text{C}_{29}\text{H}_{52}\text{ClNO}_4\text{Si}]^+$  527.3325; found 527.3318.  $[\alpha]_D^{20} = -10.9$  ( $c = 0.760$ ,  $\text{CHCl}_3$ ).

### Synthesis of the ester **S57**.

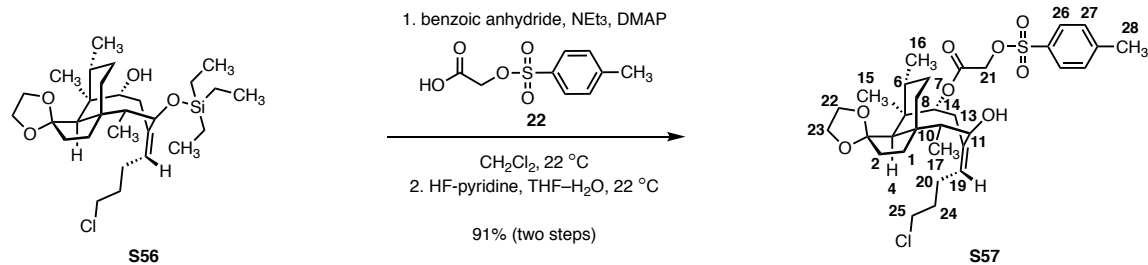

4-Dimethylaminepyridine (5.80 mg, 47.4  $\mu\text{mol}$ , 0.10 equiv) was added to a solution of the sulfonate **22** (600 mg, 2.61 mmol, 5.50 equiv), benzoic anhydride (590 mg, 2.61 mmol, 5.50 equiv), triethylamine (429  $\mu\text{L}$ , 3.08 mmol, 6.50 equiv), and the allylic silyl ether **S56** [250 mg, 474  $\mu\text{mol}$ , 1 equiv; dried by azeotropic distillation with benzene ( $3 \times 1.0 \text{ mL}$ )] in dichloromethane (4.7 mL) at 22 °C. The reaction mixture was stirred for 2 h at 22 °C. The product mixture was diluted sequentially with ether (6.0 mL) and 1 N aqueous sodium hydroxide solution (4.0 mL). The resulting biphasic mixture was transferred to a separatory funnel and the layers that formed were separated. The aqueous layer was extracted with ether ( $4 \times 6.0 \text{ mL}$ ). The organic layers were combined and the combined organic layers were washed with saturated aqueous sodium chloride solution (12 mL). The washed organic layer was dried over magnesium sulfate. The dried solution was filtered and the filtrate was concentrated. The residue obtained was used directly in the following step.

Hydrogen fluoride–pyridine complex (119  $\mu\text{L}$ , 948  $\mu\text{mol}$ , 2.00 equiv) was added to a solution of the unpurified product obtained in the preceding step (nominally 474  $\mu\text{mol}$ , 1 equiv) in 2:1 tetrahydrofuran–water (9.5 mL) at 22 °C. The reaction mixture was stirred for 16 h at 22 °C. The product mixture was diluted sequentially with ethyl acetate (10 mL) and saturated aqueous sodium bicarbonate solution (6.0 mL). The resulting biphasic mixture was transferred to a separatory funnel and the layers that formed were separated. The aqueous layer was extracted with ethyl acetate ( $3 \times 10 \text{ mL}$ ). The organic layers were combined and the combined organic layers were washed with saturated aqueous sodium chloride solution (20 mL). The washed organic layer was dried over magnesium sulfate. The dried solution was filtered and the filtrate was concentrated. The residue obtained was purified by flash-column chromatography (eluting with 10% ethyl acetate–hexanes initially, grading to 50% ethyl acetate–hexanes, three steps) to provide the ester **S57** as a white foam (271 mg, 91% over two steps).

$R_f = 0.45$  (50% ethyl acetate–hexanes; PAA).  $^1\text{H NMR}$  (600 MHz,  $\text{CDCl}_3$ )  $\delta$  7.83 (d,  $J = 8.4 \text{ Hz}$ , 2H, H<sub>26</sub>), 7.35 (d,  $J = 8.0 \text{ Hz}$ , 2H, H<sub>27</sub>), 5.93 (dd,  $J = 11.7, 4.5 \text{ Hz}$ , 1H, H<sub>14</sub>), 5.30 (ddd,  $J = 7.7, 6.5, 2.6$ , 1H, H<sub>19</sub>), 4.58–4.47 (m, 2H, H<sub>21</sub>), 4.00–3.93 (m, 1H, H<sub>22a</sub> or H<sub>23a</sub>), 3.89 (d,  $J = 9.2 \text{ Hz}$ , 1H, H<sub>11</sub>), 3.88–3.76 (m, 2H, H<sub>22b</sub>, H<sub>23b</sub>), 3.70–3.63 (m, 1H, H<sub>22a</sub> or H<sub>23a</sub>), 3.60–3.50 (m, 2H, H<sub>25</sub>), 3.03 (s, 1H, H<sub>4</sub>), 2.68 (dd,  $J = 15.4, 11.7 \text{ Hz}$ , 1H, H<sub>13a</sub>), 2.45 (s, 3H, H<sub>28</sub>), 2.34–2.12 (m, 5H, H<sub>6</sub>, H<sub>10</sub>, H<sub>13b</sub>, H<sub>20</sub>), 1.98–1.83 (m, 2H, H<sub>24</sub>), 1.76 (ddd,  $J = 14.0, 11.4, 8.9 \text{ Hz}$ , 1H, H<sub>2a</sub>), 1.69 (ddd,  $J = 14.0, 10.0, 1.5 \text{ Hz}$ , 1H, H<sub>2b</sub>), 1.52–1.43 (m, 3H, H<sub>7</sub>, H<sub>8a</sub>), 1.40–1.33 (m, 2H, H<sub>1a</sub>, H<sub>8b</sub>), 1.29–1.21 (m, 1H, H<sub>1b</sub>), 1.10–1.07 (m, 6H, H<sub>15</sub>, H<sub>17</sub>), 0.61 (d,  $J = 7.2 \text{ Hz}$ , 3H, H<sub>16</sub>).  $^{13}\text{C NMR}$  (150 MHz,  $\text{CDCl}_3$ )  $\delta$  165.4 (C), 145.3 (C), 141.4 (C), 132.6 (C), 129.9 (2  $\times$  CH), 127.9 (2  $\times$  CH), 126.7 (CH), 119.5 (C), 83.7 (CH), 73.2 (CH), 65.0 (CH<sub>2</sub>), 63.7 (CH<sub>2</sub>), 61.4 (CH<sub>2</sub>), 50.6 (CH), 45.5 (C), 44.8 (CH<sub>2</sub>),



42.4 (C), 41.5 (CH), 35.9 (CH<sub>2</sub>), 35.6 (CH), 31.5 (CH<sub>2</sub>), 29.7 (CH<sub>2</sub>), 28.6 (CH<sub>2</sub>), 28.5 (CH<sub>2</sub>), 27.4 (CH<sub>2</sub>), 25.2 (CH<sub>2</sub>), 21.7 (CH<sub>3</sub>), 17.1 (CH<sub>3</sub>), 15.9 (CH<sub>3</sub>), 15.3 (CH<sub>3</sub>). IR (ATR-FTIR), cm<sup>-1</sup>: 2949 (w), 2361 (w), 2337 (w), 1757 (w), 1372 (m), 1190 (m), 1177 (s), 1037 (m). HRMS-ESI (m/z): [M + Na]<sup>+</sup> calcd for [C<sub>32</sub>H<sub>45</sub>ClNaO<sub>8</sub>S]<sup>+</sup> 647.2421; found 647.2416. [α]<sub>D</sub><sup>20</sup> = -73.6 (c = 0.205, CHCl<sub>3</sub>).

Synthesis of the hydrogenation product **S58**.

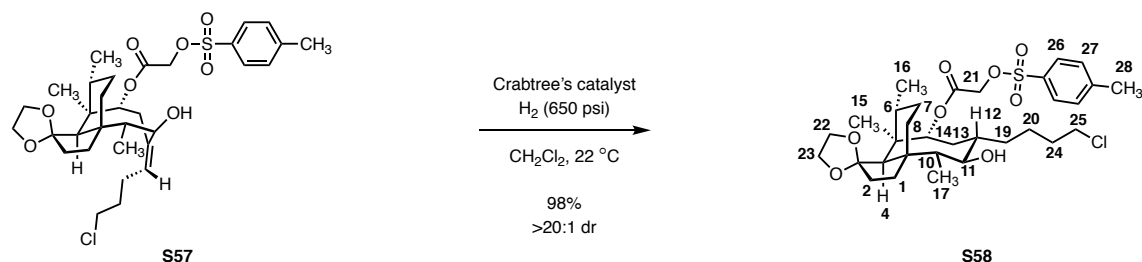

Crabtree's catalyst (1.00 mg, 1.20  $\mu\text{mol}$ , 5 mol%) was added to a solution of the allylic alcohol **S57** (15.0 mg, 24.0  $\mu\text{mol}$ , 1 equiv) in dichloromethane (2.4 mL) at 22 °C in a nitrogen-filled drybox. The reaction vessel was then transferred to a stainless-steel hydrogenation apparatus. The apparatus was sealed and removed from the drybox. The apparatus was purged with dihydrogen by pressurizing to 200 psi and venting. This process was repeated three times. The vessel was then pressurized to 650 psi dihydrogen and sealed. The reaction mixture was stirred at 22 °C for 15 h. The apparatus was then slowly vented. The product mixture was concentrated and the residue was purified by flash-column chromatography (eluting with 20% ethyl acetate–hexanes) to provide the alcohol **S58** as a colorless oil (14.8 mg, 98%).

Within the limits of detection (600 MHz,  $^1\text{H}$  NMR analysis), the hydrogenation product **S56** was formed as a single diastereomer. The relative stereochemistry was assigned by comparison of  $^3J_{\text{H-H}}$  coupling constants to the hydrogenation product **35**.

$R_f = 0.45$  (50% ethyl acetate–hexanes; PAA).  $^1\text{H}$  NMR (600 MHz,  $\text{CDCl}_3$ )  $\delta$  7.83 (d,  $J = 8.3$  Hz, 2H, H<sub>26</sub>), 7.35 (d,  $J = 8.2$  Hz, 2H, H<sub>27</sub>), 5.33 (dd,  $J = 7.9$ , 1H, H<sub>14</sub>), 4.50 (d,  $J = 1.7$  Hz, 2H, H<sub>21</sub>), 4.08 – 3.98 (m, 1H, H<sub>22a</sub> or <sub>23a</sub>), 3.90 (tq,  $J = 13.7$ , 6.6 Hz, 2H, H<sub>22b</sub>, H<sub>23b</sub>), 3.81 – 3.71 (m, 1H, H<sub>22a</sub> or <sub>23a</sub>), 3.53 (t,  $J = 6.7$  Hz, 2H, H<sub>25</sub>), 3.32 (dd,  $J = 9.7$ , 6.7 Hz, 1H, H<sub>11</sub>), 2.45 (s, 3H, H<sub>28</sub>), 2.23 (dh,  $J = 9.4$ , 6.8 Hz, 1H, H<sub>6</sub>), 2.12 (p,  $J = 7.1$  Hz, 1H, H<sub>10</sub>), 1.95 (s, 1H, H<sub>4</sub>), 1.89 – 1.67 (m, 7H, H<sub>2</sub>, H<sub>12</sub>, H<sub>13</sub>, H<sub>24</sub>), 1.61 – 1.42 (m, 3H, H<sub>7</sub>, H<sub>19a</sub>), 1.50 – 1.22 (m, 7H, H<sub>1</sub>, H<sub>8</sub>, H<sub>19b</sub>, H<sub>20</sub>), 1.04 (s, 3H, H<sub>15</sub>), 0.90 (d,  $J = 7.0$  Hz, 3H, H<sub>17</sub>), 0.62 (d,  $J = 7.1$  Hz, 3H, H<sub>16</sub>).  $^{13}\text{C}$  NMR (150 MHz,  $\text{CDCl}_3$ )  $\delta$  165.7 (C), 145.2 (C), 132.6 (C), 129.9 (2  $\times$  CH), 128.1 (2  $\times$  CH), 120.3 (C), 76.1 (CH), 71.9 (CH), 65.1 (CH<sub>2</sub>), 63.8 (CH<sub>2</sub>), 61.5 (CH<sub>2</sub>), 50.9 (CH), 46.4 (CH), 46.1 (C), 45.0 (CH<sub>2</sub>), 41.6 (C), 40.1 (CH), 37.0 (CH<sub>2</sub>), 35.8 (CH<sub>2</sub>), 35.3 (CH), 32.8 (CH<sub>2</sub>), 32.4 (CH<sub>2</sub>), 29.2 (CH<sub>2</sub>), 28.7 (CH<sub>2</sub>), 28.7 (CH<sub>2</sub>), 23.4 (CH<sub>2</sub>), 21.7 (CH<sub>3</sub>), 17.5 (CH<sub>3</sub>), 14.6 (CH<sub>3</sub>), 11.5 (CH<sub>3</sub>). IR (ATR-FTIR),  $\text{cm}^{-1}$ : 2936 (m), 1754 (w), 1372 (m), 1199 (m), 1177 (s), 1035 (m). HRMS-ESI ( $m/z$ ):  $[\text{M} + \text{Na}]^+$  calcd for  $[\text{C}_{32}\text{H}_{47}\text{ClNaO}_8\text{S}]^+$  649.2578; found 649.2590.  $[\alpha]_D^{20} = -15.6$  ( $c = 0.440$ ,  $\text{CHCl}_3$ ).

### Synthesis of the thioglycolic ester **S59**.

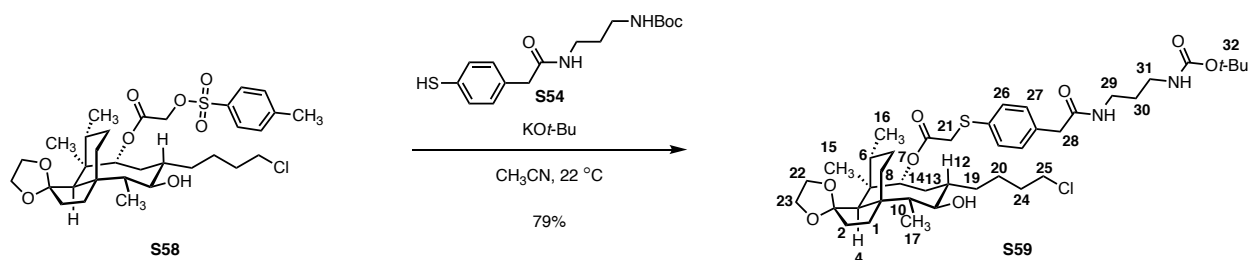

A solution potassium *tert*-butoxide in tetrahydrofuran (1.0 M, 22.0  $\mu\text{L}$ , 21.9  $\mu\text{mol}$ , 1.72 equiv) and the thiol **S54** (7.10 mg, 21.9  $\mu\text{mol}$ , 1.72 equiv) in acetonitrile (200  $\mu\text{L}$ ) was stirred for 5 min at 22  $^\circ\text{C}$ . A portion of this solution (116  $\mu\text{L}$ , 12.8  $\mu\text{mol}$ , 1.00 equiv) was added to a solution of the sulfonate **S58** [8.00 mg, 12.8  $\mu\text{mol}$ , 1 equiv; dried by azeotropic distillation with benzene ( $3 \times 1.0$  mL)] in acetonitrile (200  $\mu\text{L}$ ) at 22  $^\circ\text{C}$ . The reaction mixture was stirred for 1 h at 22  $^\circ\text{C}$ . The product mixture was diluted sequentially with ethyl acetate (1.0 mL) and 1 N aqueous sodium hydroxide solution (1.0 mL). The resulting biphasic mixture was stirred for 5 min at 22  $^\circ\text{C}$ . The stirred biphasic mixture was transferred to a borosilicate test tube and the layers that formed were separated. The aqueous phase was extracted with ethyl acetate ( $3 \times 1.0$  mL). The organic layers were combined and the combined organic layers were washed sequentially with aqueous sodium thiosulfate solution (10% w/v, 2.0 mL) and saturated aqueous sodium chloride solution (2.0 mL). The washed organic layer was dried over sodium sulfate. The dried solution was filtered and the filtrate was concentrated. The residue obtained was purified by flash-column chromatography (eluting with 15% acetone–hexanes initially, grading to 60% acetone–hexanes, four steps) to provide the sulfide **S59** as a fine, white solid (7.90 mg, 79%).

$R_f = 0.15$  (80% ethyl acetate–hexanes; PAA).  $^1\text{H}$  NMR (600 MHz,  $\text{CDCl}_3$ )  $\delta$  7.36 (d,  $J = 8.0$  Hz, 2H,  $\text{H}_{27}$ ), 7.21 (d,  $J = 7.8$  Hz, 2H,  $\text{H}_{26}$ ), 6.07 (s, 1H, NH), 5.29 (d,  $J = 7.9$  Hz, 1H,  $\text{H}_{14}$ ), 4.90 (s, 1H, NH), 4.03 (p,  $J = 6.8$  Hz, 1H,  $\text{H}_{22a}$  or  $\text{H}_{23a}$ ), 3.89 (tt,  $J = 13.7, 7.2$  Hz, 2H,  $\text{H}_{22b}$ ,  $\text{H}_{23b}$ ), 3.76 (q,  $J = 7.3, 6.8$  Hz, 1H,  $\text{H}_{22a}$  or  $\text{H}_{23a}$ ), 3.63 – 3.54 (m, 2H,  $\text{H}_{28}$ ), 3.53 – 3.46 (m, 4H,  $\text{H}_{21}$ ,  $\text{H}_{25}$ ), 3.31 (dd,  $J = 9.7, 6.8$  Hz, 1H,  $\text{H}_{11}$ ), 3.25 (q,  $J = 6.4$  Hz, 2H,  $\text{H}_{31}$ ), 3.09 (q,  $J = 6.4$  Hz, 2H,  $\text{H}_{29}$ ), 2.23 (ddd,  $J = 17.5, 13.5, 8.8$  Hz, 1H,  $\text{H}_6$ ), 2.18 – 2.10 (m, 1H,  $\text{H}_{10}$ ), 1.94 (s, 1H,  $\text{H}_4$ ), 1.88 – 1.66 (m, 5H,  $\text{H}_2$ ,  $\text{H}_{12}$ ,  $\text{H}_{13}$ ), 1.57 (dt,  $J = 12.5, 7.2$  Hz, 2H,  $\text{H}_{30}$ ), 1.45 – 1.19 (m, 21H,  $\text{H}_1$ ,  $\text{H}_7$ ,  $\text{H}_8$ ,  $\text{H}_{19}$ ,  $\text{H}_{20}$ ,  $\text{H}_{24}$ ,  $\text{H}_{32}$ ), 1.04 (s, 3H,  $\text{H}_{15}$ ), 0.90 (d,  $J = 7.1$  Hz, 3H,  $\text{H}_{17}$ ), 0.68 (d,  $J = 7.1$  Hz, 3H,  $\text{H}_{16}$ ).  $^{13}\text{C}$  NMR (150 MHz,  $\text{CDCl}_3$ )  $\delta$  171.0 (C), 169.1 (C), 156.5 (C), 134.3 (C), 133.6 (C), 130.0 ( $2 \times \text{CH}$ ), 129.9 ( $2 \times \text{CH}$ ), 120.4 (C), 79.3 (C), 75.5 (CH), 72.1 (CH), 63.8 ( $\text{CH}_2$ ), 61.5 ( $\text{CH}_2$ ), 51.0 (CH), 46.5 (CH), 46.1 (C), 45.0 ( $\text{CH}_2$ ), 43.3 ( $\text{CH}_2$ ), 41.5 (C), 40.1 (CH), 37.1 ( $\text{CH}_2$ ), 37.1 ( $\text{CH}_2$ ), 37.0 ( $\text{CH}_2$ ), 36.1 ( $\text{CH}_2$ ), 35.8 ( $\text{CH}_2$ ), 35.4 (CH), 32.7 ( $\text{CH}_2$ ), 32.4 ( $\text{CH}_2$ ), 30.1 ( $\text{CH}_2$ ), 29.3 ( $\text{CH}_2$ ), 28.7 ( $\text{CH}_2$ ), 28.4 ( $3 \times \text{CH}_3$ ), 27.2 ( $\text{CH}_2$ ), 23.5 ( $\text{CH}_2$ ), 17.7 ( $\text{CH}_3$ ), 14.7 ( $\text{CH}_3$ ), 11.5 ( $\text{CH}_3$ ). IR (ATR-FTIR),  $\text{cm}^{-1}$ : 3303 (w), 2937 (w), 2359 (m). HRMS-ESI ( $m/z$ ):  $[\text{M} + \text{Na}]^+$  calcd for  $[\text{C}_{41}\text{H}_{63}\text{N}_2\text{NaO}_8\text{S}]^+$  801.3891; found 801.3886.  $[\alpha]_D^{20} = +4.29$  ( $c = 0.190$ ,  $\text{CHCl}_3$ ).

### Synthesis of the amino amide **63**.

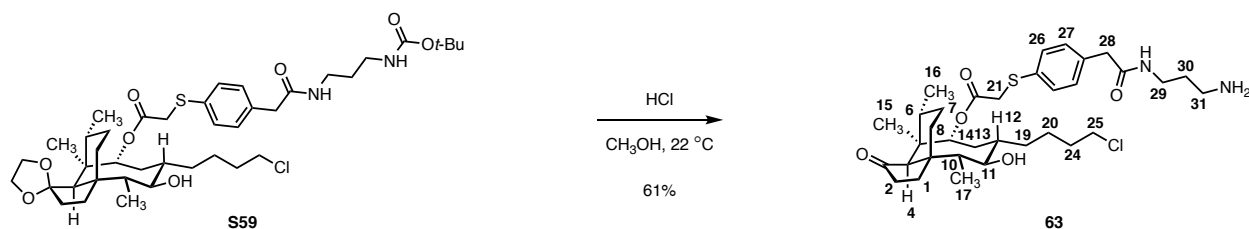

Aqueous hydrochloric acid solution (12 N, 3.20  $\mu$ L, 38.0  $\mu$ mol, 10.0 equiv) was added to a solution of the thioglycolic ester **S59** (1.00 mg, 3.80  $\mu$ mol, 1 equiv) in methanol (200  $\mu$ L) at 22 °C. The reaction mixture was stirred for 72 h at 22 °C. The product mixture was concentrated to provide the amino amide **63** as a fine, white solid (1.58 mg, 61%). The product obtained in this way was judged to be of >95% purity (600 MHz <sup>1</sup>H NMR analysis) and was used in susceptibility testing without further purification.

$R_f$  = 0.05 (95% ethyl acetate–hexanes; PAA). <sup>1</sup>H NMR (600 MHz, CD<sub>3</sub>OD)  $\delta$  7.36 (d,  $J$  = 8.3 Hz, 2H, H<sub>27</sub>), 7.25 (d,  $J$  = 8.2 Hz, 2H, H<sub>26</sub>), 5.32 (d,  $J$  = 6.5 Hz, 1H, H<sub>14</sub>), 3.69 (d,  $J$  = 15.1 Hz, 1H, H<sub>21a</sub>), 3.60 (d,  $J$  = 15.2 Hz, 1H, H<sub>21b</sub>), 3.51 (t,  $J$  = 6.7 Hz, 2H, H<sub>25</sub>), 3.48 (s, 2H, H<sub>28</sub>), 3.31 (m, 1H, H<sub>11</sub>; detected by HSQC), 3.26 (t,  $J$  = 6.7 Hz, 2H, H<sub>29</sub>), 2.87 (dd,  $J$  = 8.5, 6.1 Hz, 2H, H<sub>31</sub>), 2.33 – 2.07 (m, 4H, H<sub>2</sub>, H<sub>4</sub>, H<sub>10</sub>), 1.86 – 1.62 (m, 7H, H<sub>8a</sub>, H<sub>12</sub>, H<sub>13a</sub>, H<sub>24</sub>, H<sub>30</sub>), 1.58 (ddt,  $J$  = 11.5, 7.1, 3.5 Hz, 1H, H<sub>6</sub>), 1.49 – 1.23 (m, 11H, H<sub>1</sub>, H<sub>7</sub>, H<sub>13b</sub>, H<sub>15</sub>, H<sub>19a</sub>, H<sub>20</sub>), 1.23 – 1.07 (m, 2H, H<sub>8b</sub>, H<sub>19b</sub>), 0.95 (d,  $J$  = 7.0 Hz, 3H, H<sub>17</sub>), 0.70 (d,  $J$  = 7.1 Hz, 3H, H<sub>16</sub>). <sup>13</sup>C NMR (150 MHz, CD<sub>3</sub>OD)  $\delta$  218.3 (C), 173.2 (C), 169.7 (C), 134.1 (C), 133.8 (C), 129.4 (2  $\times$  CH), 129.4 (2  $\times$  CH), 74.0 (CH), 71.2 (CH), 57.7 (CH), 45.8 (CH), 45.3 (C), 44.4 (CH<sub>2</sub>), 41.8 (CH<sub>2</sub>), 41.3 (C), 41.3 (CH), 36.7 (CH<sub>2</sub>), 36.7 (CH), 36.4 (CH<sub>2</sub>), 35.9 (CH<sub>2</sub>), 35.6 (CH<sub>2</sub>), 33.8 (CH<sub>2</sub>), 32.6 (CH<sub>2</sub>), 31.9 (CH<sub>2</sub>), 30.3 (CH<sub>2</sub>), 27.4 (CH<sub>2</sub>), 26.8 (CH<sub>2</sub>), 24.8 (CH<sub>2</sub>), 23.2 (CH<sub>2</sub>), 16.5 (CH<sub>3</sub>), 14.1 (CH<sub>3</sub>), 10.3 (CH<sub>3</sub>). IR (ATR-FTIR), cm<sup>-1</sup>: 3285 (m), 1643 (w), 1014 (s) 514 (m). HRMS-ESI (m/z): [M + Na]<sup>+</sup> calcd for [C<sub>34</sub>H<sub>51</sub>ClN<sub>2</sub>NaO<sub>5</sub>S]<sup>+</sup> 657.3105; found 657.3099.  $[\alpha]_D^{20}$  = +74.4 ( $c$  = 0.063, CH<sub>3</sub>OH).

### Synthesis of the azide **S60**.

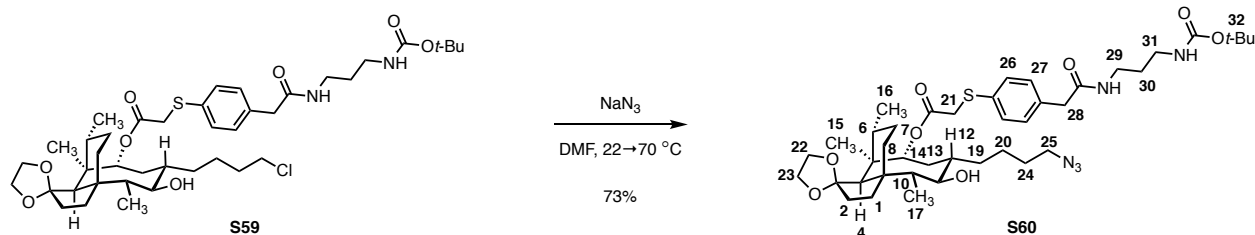

Sodium azide (2.40 mg, 37.6  $\mu\text{mol}$ , 3.00 equiv) was added to a solution of the alkyl chloride **S59** (12.2 mg, 12.5  $\mu\text{mol}$ , 1 equiv) in *N,N*-dimethylformamide (200  $\mu\text{L}$ ) at 22  $^{\circ}\text{C}$ . The reaction vessel was sealed and the sealed reaction vessel was placed in an oil bath that had been preheated to 70  $^{\circ}\text{C}$ . The reaction mixture was stirred at 3 h at 70  $^{\circ}\text{C}$ . The product mixture was cooled to 22  $^{\circ}\text{C}$  over 10 min. The cooled product mixture was diluted sequentially with ethyl acetate (2.0 mL) and water (1.0 mL). The resulting biphasic mixture was transferred to a borosilicate test tube and the layers that formed were separated. The organic layer was washed sequentially with water ( $2 \times 1.0$  mL) and saturated aqueous sodium chloride solution (2.0 mL). The washed organic layer was dried over sodium sulfate. The dried solution was filtered and the filtrate was concentrated. The residue obtained was purified by flash-column chromatography (eluting with 40% acetone–hexanes) to provide the azide **S60** as a fine, white solid (7.20 mg, 73%).

$R_f$  = 0.15 (80% ethyl acetate–hexanes; PAA).  $^1\text{H}$  NMR (500 MHz,  $\text{CDCl}_3$ )  $\delta$  7.36 (d,  $J$  = 8.2 Hz, 2H,  $\text{H}_{26}$ ), 7.20 (d,  $J$  = 7.9 Hz, 2H,  $\text{H}_{27}$ ), 6.08 (s, 1H, NH), 5.29 (d,  $J$  = 7.7 Hz, 1H,  $\text{H}_{14}$ ), 4.89 (s, 1H, NH), 4.03 (q,  $J$  = 6.0, 4.8 Hz, 1H,  $\text{H}_{22\text{a}}$  or  $\text{H}_{23\text{a}}$ ), 3.94 – 3.82 (m, 2H  $\text{H}_{22\text{b}}$ ,  $\text{H}_{23\text{b}}$ ), 3.80 – 3.72 (m, 1H,  $\text{H}_{22\text{a}}$  or  $\text{H}_{23\text{a}}$ ), 3.64 – 3.54 (m, 2H,  $\text{H}_{21}$ ), 3.51 (s, 2H,  $\text{H}_{28}$ ), 3.31 (dd,  $J$  = 9.6, 6.7, 1H,  $\text{H}_{11}$ ), 3.24 (p,  $J$  = 6.7 Hz, 4H,  $\text{H}_{25}$ ,  $\text{H}_{31}$ ), 3.09 (q,  $J$  = 6.4 Hz, 2H,  $\text{H}_{29}$ ), 2.23 (q,  $J$  = 8.3, 6.8 Hz, 1H,  $\text{H}_6$ ), 2.15 (p,  $J$  = 6.7 Hz, 1H,  $\text{H}_{10}$ ), 1.95 (s, 1H,  $\text{H}_4$ ), 1.89 – 1.69 (m, 5H,  $\text{H}_2$ ,  $\text{H}_{12}$ ,  $\text{H}_{13\text{a}}$ ,  $\text{H}_{8\text{a}}$ ), 1.65 – 1.16 (m, 23H,  $\text{H}_1$ ,  $\text{H}_7$ ,  $\text{H}_{8\text{b}}$ ,  $\text{H}_{13\text{b}}$ ,  $\text{H}_{19}$ ,  $\text{H}_{20}$ ,  $\text{H}_{24}$ ,  $\text{H}_{30}$ ,  $\text{H}_{32}$ ), 1.04 (s, 3H,  $\text{H}_{15}$ ), 0.90 (d,  $J$  = 6.9 Hz, 3H,  $\text{H}_{17}$ ), 0.67 (d,  $J$  = 7.1 Hz, 3H,  $\text{H}_{16}$ ).  $^{13}\text{C}$  NMR (150 MHz,  $\text{CDCl}_3$ )  $\delta$  171.0 (C), 169.1 (C), 156.5 (C), 134.3 (C), 133.6 (C), 130.0 ( $2 \times \text{CH}$ ), 129.9 ( $2 \times \text{CH}$ ), 120.4 (C), 79.3 (C), 75.5 (CH), 72.0 (CH), 63.8 ( $\text{CH}_2$ ), 61.5 ( $\text{CH}_2$ ), 51.3 ( $\text{CH}_2$ ), 51.0 (CH), 46.6 (CH), 46.1 (C), 43.3 ( $\text{CH}_2$ ), 41.5 (C), 40.1 (CH), 37.2 ( $\text{CH}_2$ ), 37.1 ( $\text{CH}_2$ ), 37.0 ( $\text{CH}_2$ ), 36.1 ( $\text{CH}_2$ ), 35.8 ( $\text{CH}_2$ ), 35.4 (CH), 32.7 ( $\text{CH}_2$ ), 30.1 ( $\text{CH}_2$ ), 29.3 ( $\text{CH}_2$ ), 29.0 ( $\text{CH}_2$ ), 28.7 ( $\text{CH}_2$ ), 28.4 ( $3 \times \text{CH}_3$ ), 27.2 ( $\text{CH}_2$ ), 23.3 ( $\text{CH}_2$ ), 17.7 ( $\text{CH}_3$ ), 14.7 ( $\text{CH}_3$ ), 11.5 ( $\text{CH}_3$ ). IR (ATR-FTIR),  $\text{cm}^{-1}$ : 2931 (m), 2359 (s), 2341 (m), 2096 (m), 1695 (m). HRMS-ESI ( $m/z$ ):  $[\text{M} + \text{Na}]^+$  calcd for  $[\text{C}_{41}\text{H}_{63}\text{N}_5\text{NaO}_8\text{S}]^+$  808.4295; found 808.4290.  $[\alpha]_D^{20} = +7.04$  ( $c = 0.112$ ,  $\text{CHCl}_3$ ).

### Synthesis of the triazole **S61**.

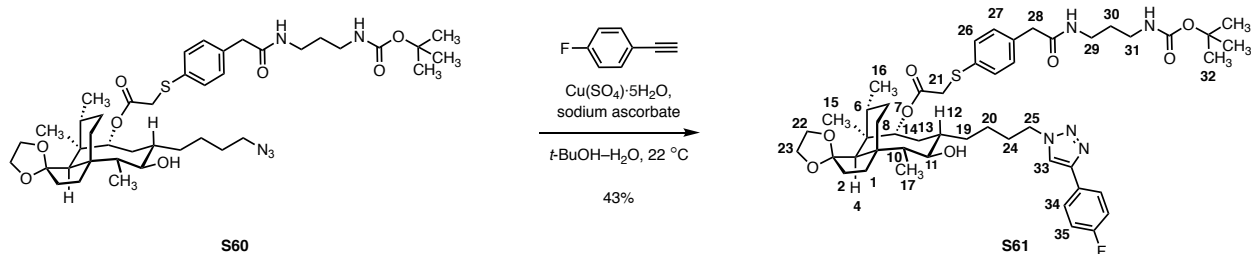

A solution of copper sulfate in water (2.5 mM, 61.0  $\mu\text{L}$ , 150 nmol, 3.0 mol%) and a solution of sodium ascorbate in water (25.0 mM, 61.0  $\mu\text{L}$ , 1.50  $\mu\text{mol}$ , 0.30 equiv) were added to a solution of 1-ethynyl-4-fluorobenzene (1.00 mg, 8.70  $\mu\text{mol}$ , 1.70 equiv) and the azide **S60** (4.00 mg, 5.10  $\mu\text{mol}$ , 1 equiv) in *tert*-butanol (200  $\mu\text{L}$ ) at 22  $^\circ\text{C}$ . The reaction mixture was stirred for 2 d at 22  $^\circ\text{C}$ . The product mixture was diluted sequentially with ethyl acetate (2.0 mL) and water (1.0 mL). The resulting biphasic mixture was transferred to a borosilicate test tube and the layers that formed were separated. The aqueous layer was extracted with ethyl acetate (2  $\times$  2.0 mL). The organic layers were combined and the combined organic layers were washed sequentially with water (2  $\times$  1.0 mL) and saturated aqueous sodium chloride solution (2.0 mL). The washed organic layer was dried over magnesium sulfate. The dried solution was filtered and the filtrate was concentrated. The residue obtained was purified by flash-column chromatography (eluting with 80% ethyl acetate–hexanes) to provide the triazole **S61** as a fine white solid (2.00 mg, 43%).

$R_f = 0.25$  (90% ethyl acetate–hexanes; PAA).  $^1\text{H NMR}$  (600 MHz,  $\text{CD}_2\text{Cl}_2$ )  $\delta$  7.85 (s, 1H, H<sub>33</sub>), 7.82 (dd,  $J = 8.6, 5.5$  Hz, 2H, H<sub>34</sub>), 7.31 (d,  $J = 8.2$  Hz, 2H, H<sub>27</sub>), 7.20 (d,  $J = 7.9$  Hz, 2H, H<sub>26</sub>), 7.13 (t,  $J = 8.8$  Hz, 2H, H<sub>35</sub>), 6.32 (s, 1H, NH), 5.25 (d,  $J = 7.8$  Hz, 1H, H<sub>14</sub>), 5.05 (s, 1H, NH), 4.38 – 4.26 (m, 2H, H<sub>25</sub>), 4.01 (td,  $J = 7.3, 5.8$  Hz, 1H, H<sub>22a</sub> or <sub>23a</sub>), 3.92 – 3.80 (m, 2H, H<sub>22b</sub>, H<sub>23b</sub>), 3.72 (td,  $J = 7.6, 5.8$  Hz, 1H, H<sub>22a</sub> or <sub>23a</sub>), 3.59 (q,  $J = 15.4$  Hz, 2H, H<sub>21</sub>), 3.47 (s, 2H, H<sub>28</sub>), 3.29 (dt,  $J = 9.7, 6.6$  Hz, 1H, H<sub>11</sub>), 3.23 (q,  $J = 6.3$  Hz, 2H, H<sub>29</sub>), 3.07 (q,  $J = 6.3$  Hz, 2H, H<sub>31</sub>), 2.24 (tt,  $J = 13.4, 6.1$  Hz, 1H, H<sub>6</sub>), 2.16 – 2.09 (m, 1H, H<sub>10</sub>), 2.00 – 1.89 (m, 2H, H<sub>4</sub>, H<sub>24a</sub>), 1.88 – 1.19 (m, 27H, H<sub>1</sub>, H<sub>2</sub>, H<sub>7</sub>, H<sub>8</sub>, H<sub>12</sub>, H<sub>13</sub>, H<sub>19</sub>, H<sub>20</sub>, H<sub>24b</sub>, H<sub>30</sub>, H<sub>32</sub>), 1.04 (s, 3H, H<sub>15</sub>), 0.89 (d,  $J = 7.0$  Hz, 3H, H<sub>17</sub>), 0.68 (d,  $J = 7.2$  Hz, 3H, H<sub>16</sub>).  $^{13}\text{C NMR}$  (125 MHz,  $\text{CD}_2\text{Cl}_2$ )  $\delta$  171.1 (C), 169.5 (C), 163.9 (C), 156.7 (broad, C), 147.0 (C), 134.6 (C), 134.4 (C), 130.3 (2  $\times$  CH), 129.9 (2  $\times$  CH), 127.8 (2  $\times$  CH), 120.7 (C), 120.2 (CH), 116.1 (d,  $J = 21.8$  Hz, 2  $\times$  CH), 79.3 (C), 75.9 (CH), 72.2 (CH), 64.2 (CH<sub>2</sub>), 61.9 (CH<sub>2</sub>), 51.3 (CH), 50.5 (CH<sub>2</sub>), 46.8 (CH), 46.5 (C), 43.5 (CH<sub>2</sub>), 42.0 (C), 40.7 (CH), 37.5 (CH<sub>2</sub>), 37.3 (CH<sub>2</sub>), 36.5 (CH<sub>2</sub>), 36.1 (CH<sub>2</sub>), 35.8 (CH<sub>2</sub>), 35.4 (broad, CH), 32.6 (CH<sub>2</sub>), 31.0 (CH<sub>2</sub>), 30.6 (CH<sub>2</sub>), 30.5 (CH<sub>2</sub>), 29.7 (CH<sub>2</sub>), 29.1 (CH<sub>2</sub>), 28.5 (3  $\times$  CH<sub>3</sub>), 27.7 (CH<sub>2</sub>), 23.4 (CH<sub>2</sub>), 17.9 (CH<sub>3</sub>), 14.9 (CH<sub>3</sub>), 11.7 (CH<sub>3</sub>).  $^{19}\text{F NMR}$  (470 MHz,  $\text{CD}_2\text{Cl}_2$ )  $\delta$  –114.8. IR (ATR-FTIR),  $\text{cm}^{-1}$ : 2931 (w), 2360 (m), 2339 (w), 1714 (m). HRMS-ESI ( $m/z$ ):  $[\text{M} + \text{Na}]^+$  calcd for  $[\text{C}_{49}\text{H}_{68}\text{FN}_5\text{NaO}_8\text{S}]^+$  928.4670; found 928.4665.  $[\alpha]_D^{20} = +14.8$  ( $c = 0.027$ ,  $\text{CHCl}_3$ ).

### Synthesis of the triazole **64**.

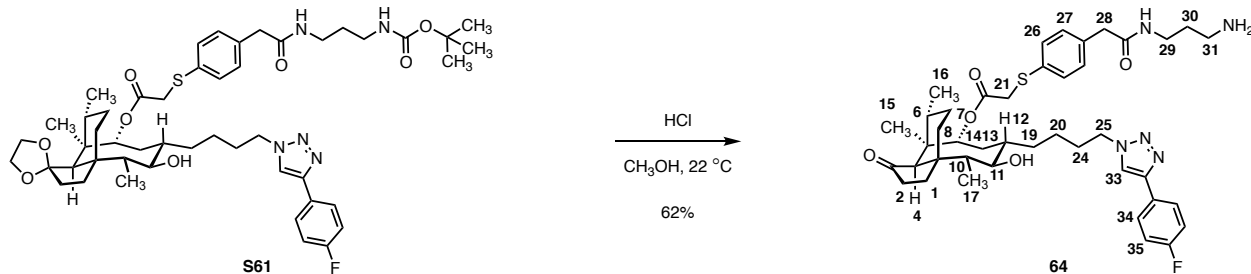

Aqueous hydrochloric acid solution (12 N, 2.80  $\mu\text{L}$ , 33.1  $\mu\text{mol}$ , 20.0 equiv) was added to a solution of the ketal **S61** (1.50 mg, 1.70  $\mu\text{mol}$ , 1 equiv) in methanol (200  $\mu\text{L}$ ) at 22  $^\circ\text{C}$ . The reaction mixture was stirred for 2 d at 22  $^\circ\text{C}$ . The product mixture was concentrated to provide the triazole **64** as a fine, white solid (810  $\mu\text{g}$ , 62%). The product obtained in this way was judged to be of >95% purity (600 MHz  $^1\text{H}$  NMR analysis) and was used in susceptibility testing without further purification.

$R_f = 0.05$  (95% ethyl acetate–hexanes; PAA).  $^1\text{H}$  NMR (600 MHz,  $\text{CD}_3\text{OD}$ )  $\delta$  8.36 (s, 1H, H<sub>33</sub>), 7.82 (dd,  $J = 8.7, 5.4$  Hz, 2H, H<sub>34</sub>), 7.29 (d,  $J = 8.3$  Hz, 2H, H<sub>27</sub>), 7.21 (d,  $J = 8.3$  Hz, 2H, H<sub>26</sub>), 7.17 (t,  $J = 8.8$  Hz, 2H, H<sub>35</sub>), 5.29 (d,  $J = 6.4$  Hz, 1H, H<sub>14</sub>), 4.45 – 4.33 (m, 2H, H<sub>25</sub>), 3.68 – 3.53 (m, 2H, H<sub>21</sub>), 3.46 (s, 2H, H<sub>28</sub>), 3.29 (1H, H<sub>11</sub>; detected by HSQC), 3.25 (t,  $J = 6.7$  Hz, 2H, H<sub>29</sub>), 2.88 (t,  $J = 7.3$  Hz, 2H, H<sub>31</sub>), 2.26 – 2.18 (m, 2H, H<sub>2a</sub>, H<sub>4</sub>), 2.18 – 2.06 (m, 2H, H<sub>2b</sub>, H<sub>10</sub>), 1.97 – 1.53 (m, 10H, H<sub>1a</sub>, H<sub>6</sub>, H<sub>8a</sub>, H<sub>12</sub>, H<sub>13a</sub>, H<sub>19a</sub>, H<sub>24</sub>, H<sub>30</sub>), 1.50 – 1.17 (m, 10H, H<sub>1b</sub>, H<sub>7</sub>, H<sub>13b</sub>, H<sub>15</sub>, H<sub>19b</sub>, H<sub>20</sub>), 1.10 (td,  $J = 14.0, 4.5$  Hz, 1H, H<sub>8b</sub>), 0.95 (d,  $J = 7.0$  Hz, 3H, H<sub>17</sub>), 0.69 (d,  $J = 7.1$  Hz, 3H, H<sub>16</sub>).  $^{13}\text{C}$  NMR (150 MHz,  $\text{CD}_3\text{OD}$ )  $\delta$  218.3 (C), 173.1 (C), 169.8 (C), 163.7 (C), 162.0 (C), 146.1 (C), 134.1 (C), 133.8 (C), 129.4 (2  $\times$  CH), 129.3 (2  $\times$  CH), 127.4 (d,  $J = 8.2$  Hz, 2  $\times$  CH), 121.2 (CH), 115.5 (d,  $J = 22.0$  Hz, 2  $\times$  CH), 74.2 (CH), 71.2 (CH), 57.6 (CH), 50.3 (CH<sub>2</sub>), 45.7 (CH), 45.3 (C), 41.8 (CH<sub>2</sub>), 41.3 (CH), 41.2 (C), 36.8 (CH<sub>2</sub>), 36.6 (CH), 36.3 (CH<sub>2</sub>), 35.8 (CH<sub>2</sub>), 35.6 (CH<sub>2</sub>), 33.8 (CH<sub>2</sub>), 31.8 (CH<sub>2</sub>), 30.3 (CH<sub>2</sub>), 29.7 (CH<sub>2</sub>), 27.4 (CH<sub>2</sub>), 26.8 (CH<sub>2</sub>), 24.8 (CH<sub>2</sub>), 22.8 (CH<sub>2</sub>), 16.6 (CH<sub>3</sub>), 14.1 (CH<sub>3</sub>), 10.3 (CH<sub>3</sub>).  $^{19}\text{F}$  NMR (375 MHz,  $\text{CD}_3\text{OD}$ )  $\delta$  –115.5 IR (ATR-FTIR),  $\text{cm}^{-1}$ : 3317 (w), 2369 (m), 2340 (w), 1014 (s). HRMS-ESI ( $m/z$ ):  $[\text{M} + \text{H}]^+$  calcd for  $[\text{C}_{42}\text{H}_{57}\text{FN}_5\text{O}_5\text{S}]^+$  762.4064; found 762.4059.  $[\alpha]_D^{20} = +127.7$  ( $c = 0.031$ ,  $\text{CH}_3\text{OH}$ ).

## Synthesis of the amine **65**.

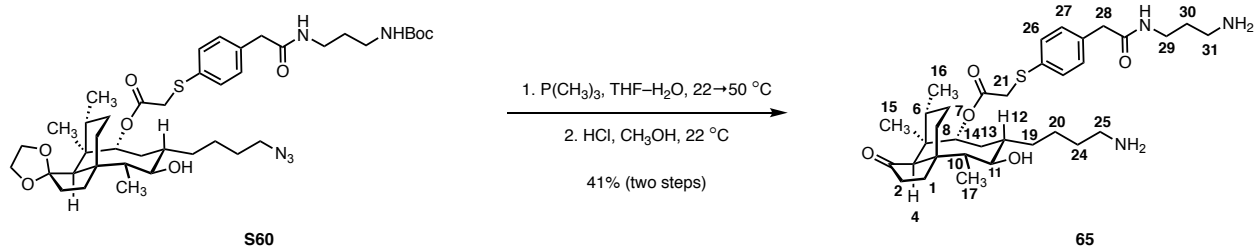

A solution of trimethylphosphine in tetrahydrofuran (100 mM, 10.0  $\mu\text{L}$ , 12.7  $\mu\text{mol}$ , 5.00 equiv) was added to a solution of the azide **S60** (2.00 mg, 2.50  $\mu\text{mol}$ , 1 equiv) in tetrahydrofuran–water (4:1 v/v, 200  $\mu\text{L}$ ) at 22  $^\circ\text{C}$ . The reaction vessel was sealed and the sealed reaction vessel was placed in an oil bath that had been preheated to 50  $^\circ\text{C}$ . The reaction mixture was stirred and heated for 3 h at 50  $^\circ\text{C}$ . The product mixture was cooled to 22  $^\circ\text{C}$  over 10 min. The cooled product mixture was diluted sequentially with dichloromethane (1.0 mL) and aqueous sodium thiosulfate solution (10% w/v, 1.0 mL). The resulting biphasic mixture was transferred to a borosilicate test tube and the layers that formed were separated. The aqueous layer was extracted with dichloromethane ( $2 \times 1.0$  mL). The organic layers were combined and the combined organic layers were washed sequentially with water (2.0 mL) and saturated aqueous sodium chloride solution (2.0 mL). The washed organic layer was dried over magnesium sulfate. The dried solution was filtered and the filtrate was concentrated. The residue obtained was used directly in the following step.

Aqueous hydrochloric acid solution (12 N, 2.10  $\mu\text{L}$ , 25.0  $\mu\text{mol}$ , 10.0 equiv) was added to a solution of the unpurified product obtained in the preceding step (nominally 2.50  $\mu\text{mol}$ , 1 equiv) in methanol (200  $\mu\text{L}$ ) at 22  $^\circ\text{C}$ . The reaction mixture was stirred for 2 d at 22  $^\circ\text{C}$ . The product mixture was concentrated to provide the amine **65** as a fine, white solid (700  $\mu\text{g}$ , 41% over two steps). The product obtained in this way was judged to be of >95% purity (600 MHz  $^1\text{H}$  NMR analysis) and was used in susceptibility testing without further purification.

$R_f = 0.05$  (95% ethyl acetate–hexanes; PAA).  $^1\text{H}$  NMR (600 MHz,  $\text{CD}_3\text{OD}$ )  $\delta$  7.37 (d,  $J = 7.7$  Hz, 2H, H<sub>26</sub>), 7.27 (dd,  $J = 8.4, 3.2$  Hz, 2H, H<sub>27</sub>), 5.36 – 5.29 (m, 1H, H<sub>14</sub>), 3.77 – 3.59 (m, 2H, H<sub>21</sub>), 3.51 (d,  $J = 5.7$  Hz, 2H, H<sub>28</sub>), 3.35 (s, 1H, H<sub>11</sub>; detected by HSQC), 3.28 (s, 2H, H<sub>29</sub>; detected by HSQC), 2.92 – 2.82 (m, 4H, H<sub>25</sub>, H<sub>31</sub>), 2.34 – 2.09 (m, 4H, H<sub>2</sub>, H<sub>4</sub>, H<sub>10</sub>), 1.97 – 1.56 (m, 10H, H<sub>1a</sub>, H<sub>6</sub>, H<sub>8a</sub>, H<sub>12</sub>, H<sub>13a</sub>, H<sub>19a</sub>, H<sub>24</sub>, H<sub>30</sub>), 1.54 – 1.06 (m, 11H, H<sub>1b</sub>, H<sub>7</sub>, H<sub>8b</sub>, H<sub>13b</sub>, H<sub>15</sub>, H<sub>19b</sub>, H<sub>20</sub>), 0.98 (d,  $J = 7.0$  Hz, 3H, H<sub>17</sub>), 0.71 (d,  $J = 7.1$  Hz, 3H, H<sub>16</sub>).  $^{13}\text{C}$  NMR (150 MHz,  $\text{CD}_3\text{OD}$ )  $\delta$  218.2 (C), 173.1 (C), 169.9 (C), 134.2 (C), 133.7 (C), 129.5 (2  $\times$  CH), 129.3 (2  $\times$  CH), 74.3 (CH), 71.0 (CH), 57.7 (CH), 45.6 (CH), 45.3 (C), 41.8 (CH<sub>2</sub>), 41.4 (CH), 41.3 (C), 39.3 (CH<sub>2</sub>), 36.8 (CH<sub>2</sub>), 36.7 (CH), 36.4 (CH<sub>2</sub>), 36.0 (CH<sub>2</sub>), 35.7 (CH<sub>2</sub>), 33.8 (CH<sub>2</sub>), 32.0 (CH<sub>2</sub>), 30.3 (CH<sub>2</sub>), 27.4 (CH<sub>2</sub>), 27.2 (CH<sub>2</sub>), 26.8 (CH), 24.8 (CH<sub>2</sub>), 22.7 (CH<sub>2</sub>), 16.6 (CH<sub>3</sub>), 14.1 (CH<sub>3</sub>), 10.3 (CH<sub>3</sub>). IR (ATR-FTIR),  $\text{cm}^{-1}$ : 3734 (w), 2359 (s), 2341 (m), 668 (w). HRMS-ESI ( $m/z$ ):  $[\text{M} + \text{H}]^+$  calcd for  $[\text{C}_{34}\text{H}_{54}\text{N}_3\text{O}_5\text{S}]^+$ , 616.3784; found 616.3795.  $[\alpha]_D^{20} = +44.6$  ( $c = 0.044$ ,  $\text{CH}_3\text{OH}$ ).



### Synthesis of the aldehyde **S62**.

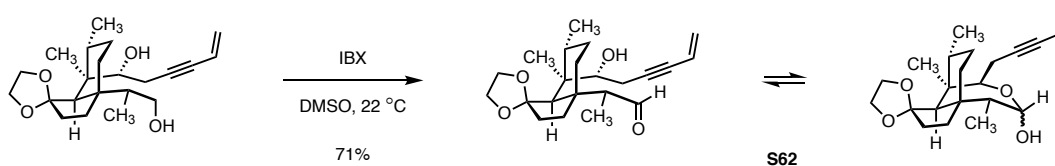

2-Iodoxybenzoic acid (171 mg, 579  $\mu\text{mol}$ , 1.05 equiv) was added in one portion to a solution of the homopropargyl alcohol **28** (200 mg, 552  $\mu\text{mol}$ , 1 equiv) in dimethylsulfoxide (5.5 mL) at 22 °C. The reaction mixture was stirred for 3 h at 22 °C. The product mixture was diluted sequentially with ether (20 mL), saturated aqueous sodium bicarbonate solution (10 mL), and saturated aqueous sodium thiosulfate solution (10 mL) at 22 °C. The resulting biphasic mixture was stirred vigorously for 30 min at 22 °C. The stirred biphasic mixture was transferred to a separatory funnel and the layers that formed were separated. The aqueous phase was extracted with ether ( $3 \times 20$  mL). The organic layers were combined and the combined organic layers were washed with saturated aqueous sodium chloride solution (50 mL). The washed organic layer was dried over magnesium sulfate. The dried solution was filtered, and the filtrate was concentrated. The residue obtained was purified by flash-column chromatography (eluting with 5% ethyl acetate–hexanes initially, grading to 20% ethyl acetate–hexanes, three steps) to provide the product **S62** as a white foam (142 mg, 71%). The product **S62** was used immediately in the following step.

$^1\text{H}$  NMR analysis (400 MHz) of the purified product indicated the presence of a 1:1 mixture of hydroxyaldehyde and hemiketal. The product was used immediately in the following step.

Synthesis of allylic silyl ether **S63**.

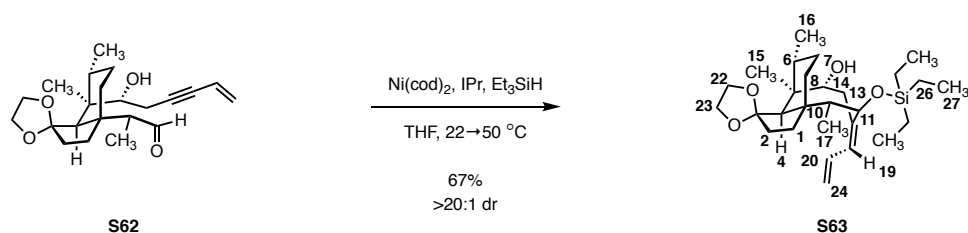

A solution of bis(cyclooctadiene)nickel(0) (19.5 mg, 70.9  $\mu\text{mol}$ , 0.20 equiv) and 1,3-bis(2,6-diisopropylphenyl)imidazol-2-ylidene (IPr, 27.6 mg, 70.9  $\mu\text{mol}$ , 0.20 equiv) in tetrahydrofuran (600  $\mu\text{L}$ ) was stirred for 30 min at 22 °C in a nitrogen-filled glovebox. The resulting solution was added to a solution of triethylsilane (169  $\mu\text{L}$ , 102  $\mu\text{mol}$ , 3.00 equiv) and the alkynyl aldehyde **S62** (142 mg, 355  $\mu\text{mol}$ , 1 equiv) in tetrahydrofuran (6.5 mL) in a round-bottomed flask fused to a Teflon-coated valve at 22 °C in a nitrogen-filled glovebox. The reaction vessel was sealed and the sealed reaction vessel was removed from the glovebox. The reaction vessel was placed in an oil bath that had been preheated to 50 °C. The reaction mixture was stirred for 3 h at 50 °C. The product mixture was cooled to 22 °C over 20 min. The cooled product mixture was eluted over a short pad of silica gel (2.0 cm  $\times$  2.0 cm, eluting with 30% ether–hexanes). The filtrates were combined and the combined filtrates were concentrated. The residue obtained was purified by flash-column chromatography (eluting with 5% ether–hexanes initially, grading to 30% ether–hexanes, three steps) to provide the allylic silyl ether **S63** as a clear oil (114 mg, 67%).

Within the limits of detection (600 MHz  $^1\text{H}$  NMR analysis), the allylic silyl ether **S63** was formed as a single diastereomer. The relative stereochemistry was assigned by comparison of  $^3J_{\text{H-H}}$  coupling constants to the allylic silyl ether **S6**.

$R_f = 0.71$  (30% ether–hexanes; PAA).  $^1\text{H}$  NMR (600 MHz,  $\text{CDCl}_3$ )  $\delta$  6.65 (dt,  $J = 16.8, 10.5$  Hz, 1H,  $\text{H}_{20}$ ), 5.84 (d,  $J = 10.7$  Hz, 1H,  $\text{H}_{19}$ ), 5.21 (d,  $J = 16.7$  Hz, 1H,  $\text{H}_{24a}$ ), 5.14 (d,  $J = 10.1$  Hz, 1H,  $\text{H}_{24b}$ ), 4.77 (dt,  $J = 10.7, 5.0$  Hz, 1H,  $\text{H}_{14}$ ), 4.06 – 3.94 (m, 1H,  $\text{H}_{22a}$  or  $\text{H}_{23b}$ ), 3.91 (d,  $J = 8.7$  Hz, 1H,  $\text{H}_{11}$ ), 3.81 (dq,  $J = 13.6, 6.9$ , 2H,  $\text{H}_{22b}, \text{H}_{23b}$ ), 3.65 (q,  $J = 7.4, 6.8$  Hz, 1H,  $\text{H}_{22a}$  or  $\text{H}_{23a}$ ), 3.02 (s, 1H,  $\text{H}_4$ ), 2.76 (dd,  $J = 15.4, 11.2$  Hz, 1H,  $\text{H}_{13a}$ ), 2.48 (dt,  $J = 15.4, 3.4$  Hz, 1H,  $\text{H}_{13b}$ ), 2.30 – 2.10 (m, 2H,  $\text{H}_6, \text{H}_{10}$ ), 1.86 – 1.66 (m, 2H,  $\text{H}_2$ ), 1.64 – 1.20 (m, 6H,  $\text{H}_1, \text{H}_7, \text{H}_8$ ), 1.01 (s, 6H,  $\text{H}_{15}, \text{H}_{16}$  or  $\text{H}_{17}$ ), 0.95 – 0.88 (m, 12H,  $\text{H}_{16}$  or  $\text{H}_{17}, \text{H}_{27}$ ), 0.56 (q,  $J = 7.9$  Hz, 6H,  $\text{H}_{26}$ ).  $^{13}\text{C}$  NMR (150 MHz,  $\text{CDCl}_3$ )  $\delta$  143.3 (C), 132.3 (CH), 127.1 (CH), 119.8 (C), 117.9 (CH<sub>2</sub>), 84.3 (CH), 69.3 (CH), 63.6 (CH<sub>2</sub>), 61.4 (CH<sub>2</sub>), 51.0 (CH), 45.5 (C), 43.1 (C), 42.5 (CH), 35.9 (CH<sub>2</sub>), 35.9 (CH), 34.3 (CH<sub>2</sub>), 28.9 (CH<sub>2</sub>), 28.6 (CH<sub>2</sub>), 27.8 (CH<sub>2</sub>), 18.6 (CH<sub>3</sub>), 15.7 (CH<sub>3</sub>), 13.9 (CH<sub>3</sub>), 7.0 (3  $\times$  CH<sub>3</sub>), 5.1 (3  $\times$  CH<sub>2</sub>). IR (ATR-FTIR),  $\text{cm}^{-1}$ : 2953 (m), 2876 (m), 2360 (s), 2340 (m), 1035 (w). HRMS-ESI ( $m/z$ ):  $[\text{M} + \text{H}]^+$  calcd for  $[\text{C}_{28}\text{H}_{49}\text{O}_4\text{Si}]^+$  477.3400; found 477.3468.  $[\alpha]_D^{20} = +23.5$  ( $c = 0.255$ ,  $\text{CHCl}_3$ ).

### Synthesis of ester **S64**.

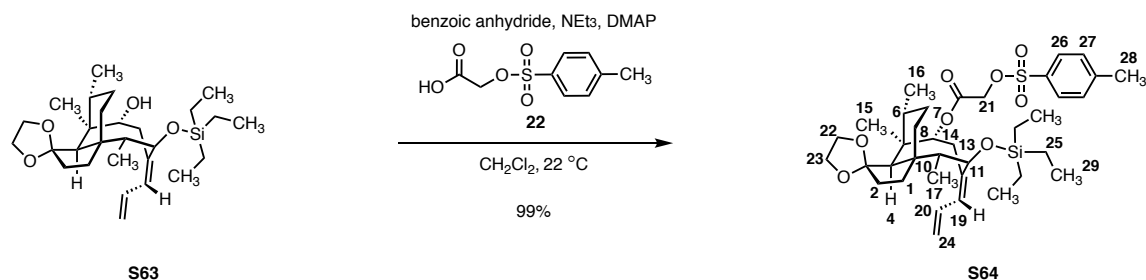

(4-Dimethylamino)pyridine (600  $\mu\text{g}$ , 5.20  $\mu\text{mol}$ , 0.10 equiv) was added to a solution of the sulfonate **22** (60.4 mg, 262  $\mu\text{mol}$ , 5.00 equiv), benzoic anhydride (59.3 mg, 262  $\mu\text{mol}$ , 5.00 equiv), triethylamine (44.0  $\mu\text{L}$ , 315  $\mu\text{mol}$ , 6.00 equiv), and the allylic silyl ether **S63** [25.0 mg, 52.4  $\mu\text{mol}$ , 1 equiv; dried by azeotropic distillation with benzene ( $3 \times 1.0\text{ mL}$ )] in dichloromethane (350  $\mu\text{L}$ ) at 22  $^\circ\text{C}$ . The reaction mixture was stirred for 2 h at 22  $^\circ\text{C}$ . The product mixture was diluted sequentially with ether (1.0 mL) and 1 N aqueous sodium hydroxide solution (1.0 mL). The resulting biphasic mixture was transferred to a separatory funnel and the layers that formed were separated. The aqueous layer was extracted with ether ( $2 \times 1.0\text{ mL}$ ). The organic layers were combined and the combined organic layers were washed with saturated aqueous sodium chloride solution (3.0 mL). The washed organic layer was dried over magnesium sulfate. The dried solution was filtered and the filtrate was concentrated. The residue obtained was purified by flash-column chromatography (eluting with 10% ether–hexanes initially, grading to 50% ether–hexanes, three steps) to provide the ester **S64** as a clear oil (36.0 mg, 99%).

$R_f = 0.71$  (30% ether–hexanes; PAA).  $^1\text{H NMR}$  (600 MHz,  $\text{CDCl}_3$ )  $\delta$  7.83 (d,  $J = 8.4\text{ Hz}$ , 2H,  $\text{H}_{26}$ ), 7.34 (d,  $J = 7.8\text{ Hz}$ , 2H,  $\text{H}_{27}$ ), 6.57 (dt,  $J = 16.7, 10.5\text{ Hz}$ , 1H,  $\text{H}_{20}$ ), 5.91 (dd,  $J = 11.3, 4.8\text{ Hz}$ , 1H,  $\text{H}_{14}$ ), 5.87 (dd,  $J = 10.9, 2.3\text{ Hz}$ , 1H,  $\text{H}_{19}$ ), 5.31 – 5.05 (m, 2H,  $\text{H}_{24}$ ), 4.56 – 4.47 (m, 2H,  $\text{H}_{21}$ ), 3.94 (q,  $J = 6.6, 6.2\text{ Hz}$ , 1H,  $\text{H}_{22\text{a}}$  or  $\text{H}_{23\text{a}}$ ), 3.90 (d,  $J = 8.7\text{ Hz}$ , 1H,  $\text{H}_{11}$ ), 3.85 – 3.75 (m, 2H,  $\text{H}_{22\text{a}}$  or  $\text{H}_{23\text{a}}$ ,  $\text{H}_{22\text{b}}$  or  $\text{H}_{23\text{b}}$ ), 3.69 – 3.62 (m, 1H,  $\text{H}_{22\text{b}}$  or  $\text{H}_{23\text{b}}$ ), 3.04 (d,  $J = 2.3\text{ Hz}$ , 1H,  $\text{H}_4$ ), 2.71 (dd,  $J = 15.1, 11.3\text{ Hz}$ , 1H,  $\text{H}_{13\text{a}}$ ), 2.43 (s, 3H,  $\text{H}_{28}$ ), 2.37 (ddd,  $J = 15.2, 4.8, 2.5\text{ Hz}$ , 1H,  $\text{H}_{13\text{b}}$ ), 2.26 – 2.14 (m, 2H,  $\text{H}_6, \text{H}_{10}$ ), 1.77 – 1.66 (m, 2H,  $\text{H}_2$ ), 1.55 – 1.40 (m, 3H,  $\text{H}_{7\text{a}}, \text{H}_8$ ), 1.37 – 1.31 (m, 2H,  $\text{H}_{1\text{a}}, \text{H}_{7\text{b}}$ ), 1.29 – 1.20 (m, 1H,  $\text{H}_{1\text{b}}$ ), 1.07 (s, 3H,  $\text{H}_{15}$ ), 1.01 (d,  $J = 6.4\text{ Hz}$ , 3H,  $\text{H}_{17}$ ), 0.90 (t,  $J = 7.9\text{ Hz}$ , 9H,  $\text{H}_{29}$ ), 0.59 (d,  $J = 7.2\text{ Hz}$ , 3H,  $\text{H}_{16}$ ), 0.53 (q,  $J = 8.0\text{ Hz}$ , 6H,  $\text{H}_{25}$ ).  $^{13}\text{C NMR}$  (150 MHz,  $\text{CDCl}_3$ )  $\delta$  164.8 (C), 145.1 (C), 142.1 (C), 132.8 (C), 131.9 (2  $\times$  CH), 129.8 (2  $\times$  CH), 128.1 (CH), 127.5 (CH), 119.7 (C), 118.4 ( $\text{CH}_2$ ), 83.6 (CH), 73.6 (CH), 65.1 ( $\text{CH}_2$ ), 63.7 ( $\text{CH}_2$ ), 61.4 ( $\text{CH}_2$ ), 50.7 (CH), 45.4 (C), 42.4 (C), 42.4 (CH), 35.9 ( $\text{CH}_2$ ), 35.5 (CH), 30.3 ( $\text{CH}_2$ ), 28.7 ( $\text{CH}_2$ ), 28.6 ( $\text{CH}_2$ ), 27.4 ( $\text{CH}_2$ ), 21.7 ( $\text{CH}_3$ ), 17.0 ( $\text{CH}_3$ ), 15.7 ( $\text{CH}_3$ ), 15.4 ( $\text{CH}_3$ ), 7.0 (3  $\times$   $\text{CH}_3$ ), 5.0 (3  $\times$   $\text{CH}_2$ ). IR (ATR-FTIR),  $\text{cm}^{-1}$ : 2953 (m), 2877 (m), 2362 (m), 2340 (m), 1761 (m), 1372 (m), 1190 (m), 1043 (s). HRMS-ESI ( $m/z$ ):  $[\text{M} + \text{Na}]^+$  calcd for  $[\text{C}_{37}\text{H}_{56}\text{NaO}_8\text{SSi}]^+$  711.3363; found 711.3348.  $[\alpha]_D^{20} = -21.5$  ( $c = 0.981, \text{CHCl}_3$ ).

Synthesis of the enal **S65**.

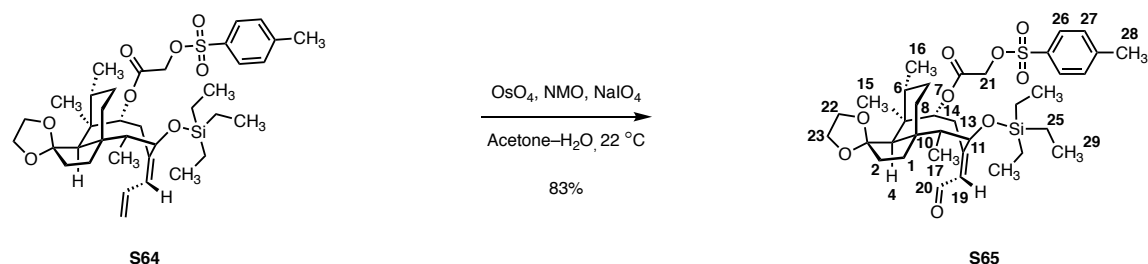

Aqueous osmium tetroxide solution (80 mM, 11.0  $\mu\text{L}$ , 870 nmol, 2.0 mol%) was added to a solution of 4-methylmorpholine *N*-oxide (10.5 mg, 87.1  $\mu\text{mol}$ , 2.00 equiv) and the diene **S64** (30.0 mg, 43.5  $\mu\text{mol}$ , 1 equiv) in acetone–water (2:1 v/v, 1.0 mL) at 22  $^\circ\text{C}$ . The reaction mixture was stirred for 16 h at 22  $^\circ\text{C}$ . Sodium metaperiodate (18.6 mg, 87.1  $\mu\text{mol}$ , 2.00 equiv) was added to the reaction mixture at 22  $^\circ\text{C}$  and the resulting solution was stirred for 3 h at 22  $^\circ\text{C}$ . The product mixture was diluted sequentially with ethyl acetate (2.0 mL) and water (1.0 mL). The resulting biphasic mixture was transferred to a separatory funnel and the layers that formed were separated. The aqueous layer was extracted with ethyl acetate (2  $\times$  1.0 mL). The organic layers were combined and the combined organic layers were washed sequentially with aqueous sodium thiosulfate solution (10% w/v, 2.0 mL) and saturated aqueous sodium chloride solution (3.0 mL). The washed organic layer was dried over magnesium sulfate. The dried solution was filtered and the filtrate was concentrated. The residue obtained was purified by flash-column chromatography (eluting with 10% ether–hexanes initially, grading to 50% ether–hexanes, three steps) to provide the enal **S65** as a clear oil (25.0 mg, 83%).

$R_f$  = 0.41 (30% ether–hexanes; UV).  $^1\text{H NMR}$  (400 MHz,  $\text{C}_6\text{D}_6$ )  $\delta$  10.08 (dd,  $J$  = 7.2, 1.9 Hz, 1H, H<sub>20</sub>), 7.79 (dd,  $J$  = 8.4, 2.0 Hz, 2H, H<sub>26</sub>), 6.72 – 6.64 (m, 2H, H<sub>27</sub>), 6.11 – 5.97 (m, 2H, H<sub>14</sub>, H<sub>19</sub>), 4.40 – 4.19 (m, 2H, H<sub>21</sub>), 3.91 (d,  $J$  = 7.9 Hz, 1H, H<sub>11</sub>), 3.52 – 3.25 (m, 4H, H<sub>13a</sub>, H<sub>22a</sub> or 23a, H<sub>22b</sub>, H<sub>23b</sub>), 3.16 (qd,  $J$  = 6.3, 5.2, 2.6 Hz, 1H, H<sub>22a</sub> or 23a), 2.96 – 2.81 (m, 2H, H<sub>4</sub>, H<sub>13b</sub>), 2.39 (dd,  $J$  = 18.7, 11.8 Hz, 2H, H<sub>6</sub>, H<sub>10</sub>), 1.81 (s, 3H, H<sub>28</sub>), 1.67 – 1.06 (m, 11H, H<sub>1</sub>, H<sub>2</sub>, H<sub>7</sub>, H<sub>8</sub>, H<sub>15</sub>), 0.96 (td,  $J$  = 7.9, 1.9 Hz, 12H, H<sub>17</sub>, H<sub>29</sub>), 0.78 (dd,  $J$  = 7.2, 2.0 Hz, 3H, H<sub>16</sub>), 0.56 (qd,  $J$  = 7.9, 1.9 Hz, 6H, H<sub>25</sub>).  $^{13}\text{C NMR}$  (100 MHz,  $\text{C}_6\text{D}_6$ )  $\delta$  189.5 (CH), 165.2 (C), 162.4 (C), 144.3 (C), 133.5 (C), 129.5 (2  $\times$  CH), 128.0 (2  $\times$  CH), 126.5 (CH), 119.3 (C), 81.9 (CH), 72.9 (CH), 64.6 (CH<sub>2</sub>), 63.4 (CH<sub>2</sub>), 61.1 (CH<sub>2</sub>), 51.9 (CH), 45.3 (C), 43.3 (CH), 42.4 (C), 35.6 (CH), 35.6 (CH<sub>2</sub>), 30.6 (CH<sub>2</sub>), 29.8 (CH<sub>2</sub>), 28.7 (CH<sub>2</sub>), 28.5 (CH<sub>2</sub>), 27.3 (CH<sub>2</sub>), 20.7 (CH<sub>3</sub>), 17.0 (CH<sub>3</sub>), 15.3 (CH<sub>3</sub>), 15.0 (CH<sub>3</sub>), 6.8 (3  $\times$  CH<sub>3</sub>), 5.0 (3  $\times$  CH<sub>2</sub>). IR (ATR-FTIR),  $\text{cm}^{-1}$ : 2953 (m), 2877 (m), 2362 (m), 2341 (m), 1762 (m), 1372 (m), 1178 (m), 1043 (s). HRMS-ESI ( $m/z$ ):  $[\text{M} + \text{Na}]^+$  calcd for  $[\text{C}_{37}\text{H}_{54}\text{NaO}_9\text{SSi}]^+$  713.3156; found 713.3153.  $[\alpha]_D^{20}$  =  $-26.0$  ( $c$  = 0.769,  $\text{CHCl}_3$ ).

### Synthesis of the aldehyde **S66**.

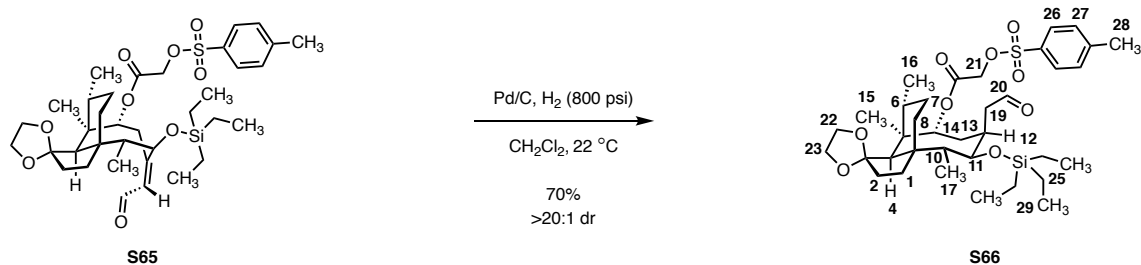

Palladium on carbon (10% w/w, 600  $\mu\text{g}$ ) was added to a solution of the enal **S65** (6.00 mg, 10.4  $\mu\text{mol}$ , 1 equiv) in dichloromethane (800  $\mu\text{L}$ ) at 22  $^{\circ}\text{C}$ . The reaction vessel was then transferred to a stainless-steel hydrogenation apparatus. The apparatus was purged with dihydrogen by pressurizing to 200 psi and venting. This process was repeated three times. The vessel was then pressurized to 800 psi dihydrogen and sealed. The reaction mixture was stirred at 22  $^{\circ}\text{C}$  for 15 h. The apparatus was then slowly vented. The product mixture was filtered over a pad of Celite. The Celite pad was rinsed with dichloromethane (5.0 mL). The filtrates were combined and the combined filtrates were concentrated. The residue obtained was purified by flash-column chromatography (eluting with 20% ether–hexanes) to provide the aldehyde **S66** as a colorless oil (4.20 mg, 70%).

Within the limits of detection (400 MHz  $^1\text{H}$  NMR analysis), the hydrogenation product **S66** was formed as a single diastereomer. The relative stereochemistry of the hydrogenation product was determined by NOE correlations between H11 and H12.

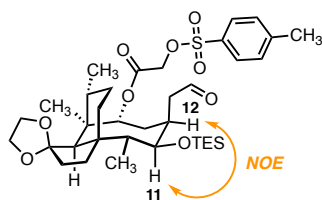

$R_f = 0.48$  (50% ether–hexanes; PAA).  $^1\text{H}$  NMR (400 MHz,  $\text{CD}_2\text{Cl}_2$ )  $\delta$  9.72 (s, 1H, H<sub>20</sub>), 7.77 (d,  $J = 8.3$  Hz, 2H, H<sub>26</sub>), 7.38 (d,  $J = 8.1$  Hz, 2H, H<sub>27</sub>), 5.28 (d,  $J = 8.9$  Hz, 1H, H<sub>14</sub>), 4.41 (d,  $J = 0.7$  Hz, 2H, H<sub>21</sub>), 4.01 (q,  $J = 6.3, 5.3$  Hz, 1H, H<sub>22a</sub> or 23a), 3.86 (qt,  $J = 12.5, 5.9$  Hz, 2H, H<sub>22b</sub>, H<sub>23b</sub>), 3.79 – 3.68 (m, 2H, H<sub>11</sub>, H<sub>22a</sub> or 23a), 2.95 (dd,  $J = 18.0, 9.3$  Hz, 1H, H<sub>19a</sub>), 2.79 (dd,  $J = 18.1, 3.8$  Hz, 1H, H<sub>19b</sub>), 2.52 (dt,  $J = 8.7, 3.9$  Hz, 1H, H<sub>12</sub>), 2.45 (s, 3H, H<sub>28</sub>), 2.31 – 2.15 (m, 2H, H<sub>6</sub>, H<sub>13a</sub>), 1.99 (q,  $J = 6.8$  Hz, 2H, H<sub>4</sub>, H<sub>10</sub>), 1.82 (td,  $J = 11.2, 10.5, 3.3$  Hz, 2H, H<sub>2</sub>), 1.58 – 1.52 (m, 2H, H<sub>8</sub>), 1.44 – 1.17 (m, 5H, H<sub>1</sub>, H<sub>7</sub>, H<sub>13b</sub>), 1.02 (s, 3H, H<sub>15</sub>), 0.93 (t,  $J = 7.9$  Hz, 9H, H<sub>29</sub>), 0.80 (d,  $J = 7.0$  Hz, 3H, H<sub>17</sub>), 0.63 – 0.54 (m, 9H, H<sub>16</sub>, H<sub>25</sub>).  $^{13}\text{C}$  NMR (100 MHz,  $\text{CD}_2\text{Cl}_2$ )  $\delta$  202.0 (CH), 165.2 (C), 145.6 (C), 132.4 (C), 130.0 (2  $\times$  CH), 127.9 (2  $\times$  CH), 120.3 (C), 72.0 (CH), 70.9 (CH), 65.3 (CH<sub>2</sub>), 63.7 (CH<sub>2</sub>), 61.5 (CH<sub>2</sub>), 50.6 (CH), 45.9 (C), 41.8 (C), 40.4 (CH<sub>2</sub>), 38.7 (CH), 35.6 (CH<sub>2</sub>), 35.2 (CH), 35.1 (CH), 34.0 (CH<sub>2</sub>), 29.1 (CH<sub>2</sub>), 28.4 (CH<sub>2</sub>), 28.4 (CH<sub>2</sub>), 27.2 (CH<sub>2</sub>), 21.4 (CH<sub>3</sub>), 16.9 (CH<sub>3</sub>), 14.4 (CH<sub>3</sub>), 12.0 (CH<sub>3</sub>), 6.7 (3  $\times$  CH<sub>3</sub>), 4.9 (3  $\times$  CH<sub>2</sub>). IR (ATR-FTIR),  $\text{cm}^{-1}$ : 2952 (m), 2878 (w), 2365 (w), 1732 (s), 1178 (m), 1047 (w). HRMS-ESI ( $m/z$ ):  $[\text{M} + \text{Na}]^+$  calcd for  $[\text{C}_{37}\text{H}_{56}\text{NaO}_9\text{SSi}]^+$  715.3312; found 715.3300.  $[\alpha]_D^{20} = -5.11$  ( $c = 0.219$ ,  $\text{CHCl}_3$ ).

Synthesis of the pyridyl sulfide **S67**.

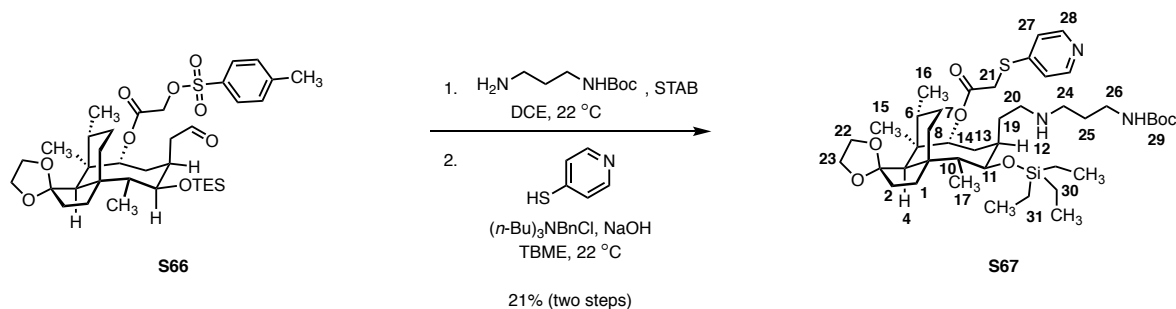

*N*-(*tert*-Butoxycarbonyl)-1,3-propanediamine (2.10 mg, 12.1  $\mu\text{mol}$ , 2.00 equiv) was added to a suspension of magnesium sulfate (1.46 mg, 12.1  $\mu\text{mol}$ , 2.00 equiv) and the aldehyde **S66** (4.20 mg, 6.11  $\mu\text{mol}$ , 1 equiv) in dichloroethane (250  $\mu\text{L}$ ) at 22 °C. The reaction mixture was stirred for 16 h at 22 °C. Sodium triacetoxyborohydride (2.60 mg, 24.2  $\mu\text{mol}$ , 2.00 equiv) was then added at 22 °C. The reaction mixture was stirred for 8 h at 22 °C. The product mixture was diluted sequentially with dichloromethane (2.0 mL) and water (1.0 mL). The resulting biphasic mixture was transferred to a separatory funnel and the layers that formed were separated. The aqueous layer was extracted with dichloromethane (2  $\times$  1.0 mL). The organic layers were combined and the combined organic layers were washed with saturated aqueous sodium chloride solution (3.0 mL). The washed organic layer was dried over magnesium sulfate. The dried solution was filtered and the filtrate was concentrated. The residue obtained was used directly in the following step.

Aqueous sodium hydroxide solution (0.1 N, 8.00  $\mu\text{L}$ , 7.90  $\mu\text{mol}$ , 1.30 equiv) was added to a solution of 4-mercaptopyridine (900  $\mu\text{g}$ , 7.90  $\mu\text{mol}$ , 1.30 equiv), benzyl tri-*n*-butylammonium chloride (100  $\mu\text{g}$ , 610 nmol, 0.10 equiv), and the unpurified product obtained in the preceding step (nominally 6.10  $\mu\text{mol}$ , 1 equiv) in *tert*-butyl methyl ether (230  $\mu\text{L}$ ) at 22 °C. The reaction mixture was stirred for 5 h at 22 °C. The product mixture was diluted sequentially with ethyl acetate (3.0 mL) and 1 N aqueous sodium hydroxide solution (1.0 mL). The resulting biphasic mixture was transferred to a separatory funnel and the layers that formed were separated. The aqueous layer was extracted with ethyl acetate (3  $\times$  2.0 mL). The organic layers were combined and the combined organic layers were washed sequentially with 0.1 N aqueous phosphoric acid solution (3.0 mL), saturated aqueous sodium bicarbonate solution (3.0 mL), and saturated aqueous sodium chloride solution (3.0 mL). The washed organic layer was dried over magnesium sulfate. The dried solution was filtered and the filtrate was concentrated. The residue obtained was purified by flash-column chromatography (eluting with 50% ethyl acetate–hexanes initially, grading to 80% ethyl acetate–hexanes, three steps) to provide the pyridyl sulfide **S67** as a white solid (1.00 mg, 21% over two steps).

$R_f$  = 0.15 (70% ethyl acetate–hexanes; PAA).  $^1\text{H}$  NMR (400 MHz,  $\text{CD}_2\text{Cl}_2$ )  $\delta$  8.39 (d,  $J$  = 6.3 Hz, 2H, H<sub>28</sub>), 7.18 (d,  $J$  = 6.3 Hz, 2H, H<sub>27</sub>), 5.44 (d,  $J$  = 8.8 Hz, 1H, H<sub>14</sub>), 4.05 – 3.95 (m, 1H, H<sub>22a</sub> or 23a), 3.94 – 3.80 (m, 2H, H<sub>22b</sub>, H<sub>23b</sub>), 3.77 – 3.56 (m, 4H, H<sub>11</sub>, H<sub>21</sub>, H<sub>22a</sub> or 23a), 3.17 – 3.10 (m, 2H, H<sub>26</sub>), 2.51 (s, 2H, H<sub>24</sub>), 2.36 (s, 2H, H<sub>20</sub>), 2.23 (ddd,  $J$  = 11.5, 7.1, 4.1 Hz, 1H, H<sub>6</sub>), 2.15 – 1.98 (m, 4H, H<sub>4</sub>, H<sub>10</sub>, H<sub>13</sub>), 1.92 – 1.48 (m, 7H, H<sub>2</sub>, H<sub>12</sub>, H<sub>19</sub>, H<sub>25</sub>), 1.45 – 1.20 (m, 16H, H<sub>1</sub>, H<sub>7</sub>, H<sub>8</sub>, H<sub>13b</sub>, H<sub>29</sub>), 1.06 (s, 3H, H<sub>15</sub>), 0.95 (td,  $J$  = 8.0, 5.0 Hz, 9H, H<sub>31</sub>), 0.78 (d,  $J$  = 7.1 Hz, 3H, H<sub>17</sub>), 0.65 (d,  $J$  = 7.2 Hz, 3H, H<sub>16</sub>), 0.58 (q,  $J$  = 7.9 Hz, 6H, H<sub>30</sub>).  $^{13}\text{C}$  NMR (150 MHz,  $\text{CD}_2\text{Cl}_2$ )  $\delta$  168.0 (C), 156.4

(C), 149.8 (2 × CH), 147.8 (C), 121.0 (2 × CH), 120.8 (C), 78.9 (C), 72.5 (CH), 72.1 (CH), 64.1 (CH<sub>2</sub>), 61.9 (CH<sub>2</sub>), 51.2 (CH), 49.4 (CH<sub>2</sub>), 48.1 (CH<sub>2</sub>), 46.4 (C), 43.2 (CH), 42.3 (C), 39.8 (CH<sub>2</sub>), 36.1 (CH<sub>2</sub>), 35.8 (CH), 35.0 (CH), 34.3 (CH<sub>2</sub>), 33.9 (CH<sub>2</sub>), 29.9 (CH<sub>2</sub>), 29.6 (CH<sub>2</sub>), 28.8 (CH<sub>2</sub>), 28.6 (3 × CH<sub>3</sub>), 27.7 (CH<sub>2</sub>), 24.6 (CH<sub>2</sub>), 17.3 (CH<sub>3</sub>), 15.0 (CH<sub>3</sub>), 12.5 (CH<sub>3</sub>), 7.3 (3 × CH<sub>3</sub>), 5.5 (3 × CH<sub>3</sub>). IR (ATR-FTIR), cm<sup>-1</sup>: 2949 (m), 2876 (m), 2360 (m), 2339 (w), 1714 (m). HRMS-ESI (m/z): [M + H]<sup>+</sup> calcd for [C<sub>42</sub>H<sub>72</sub>NaN<sub>3</sub>O<sub>7</sub>SSi]<sup>+</sup> 790.4860; found 790.4842. [α]<sub>D</sub><sup>20</sup> = +1.50 (c = 0.080, CHCl<sub>3</sub>).

Synthesis of the amine **66**.

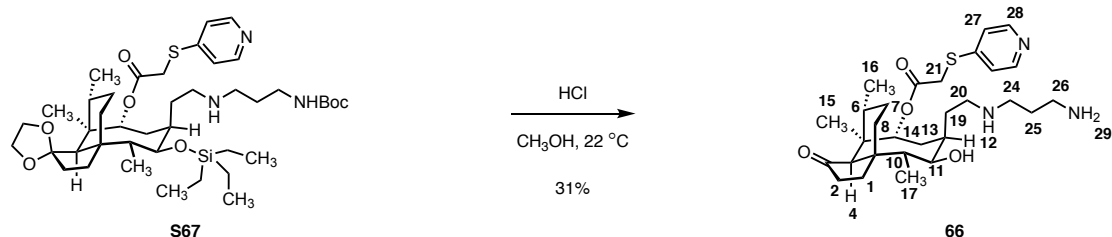

Aqueous hydrochloric acid solution (12 N, 2.10  $\mu\text{L}$ , 25.3  $\mu\text{mol}$ , 20.0 equiv) was added to a solution of the ketal **S67** (1.00 mg, 1.30  $\mu\text{mol}$ , 1 equiv) in methanol (200  $\mu\text{L}$ ) at 22  $^{\circ}\text{C}$ . The reaction mixture was stirred for 4 d at 22  $^{\circ}\text{C}$ . The product mixture was concentrated to provide the amine **66** as a fine, white solid (240  $\mu\text{g}$ , 31%). The product obtained in this way was judged to be of >95% purity (600 MHz  $^1\text{H}$  NMR analysis) and was used in susceptibility testing without further purification.

$R_f = 0.15$  (70% ethyl acetate–hexanes; PAA).  $^1\text{H}$  NMR (600 MHz,  $\text{CD}_3\text{OD}$ )  $\delta$  8.57 (d,  $J = 6.2$  Hz, 2H,  $\text{H}_{28}$ ), 7.95 (d,  $J = 6.3$  Hz, 2H,  $\text{H}_{27}$ ), 5.47 (d,  $J = 8.5$  Hz, 1H,  $\text{H}_{14}$ ), 4.38 – 4.15 (m, 2H,  $\text{H}_{21}$ ), 3.90 (t,  $J = 8.4$  Hz, 1H,  $\text{H}_{11}$ ), 3.17 – 3.10 (m, 2H,  $\text{H}_{24}$ ), 3.06 (q,  $J = 8.7, 8.2$  Hz, 2H,  $\text{H}_{26}$ ), 2.45 – 2.22 (m, 4H,  $\text{H}_4, \text{H}_{13}, \text{H}_{20a}$ ), 2.17 – 1.96 (m, 8H,  $\text{H}_2, \text{H}_{10}, \text{H}_{12}, \text{H}_{19a}, \text{H}_{20b}, \text{H}_{25}$ ), 1.79 – 1.58 (m, 3H,  $\text{H}_6, \text{H}_{8a}, \text{H}_{19b}$ ), 1.53 – 1.23 (m, 7H,  $\text{H}_1, \text{H}_7, \text{H}_{15}$ ), 1.14 (qd,  $J = 14.0, 12.2, 3.8$  Hz, 1H,  $\text{H}_{8b}$ ), 0.95 (d,  $J = 7.1$  Hz, 3H,  $\text{H}_{17}$ ), 0.73 (d,  $J = 7.0$  Hz, 3H,  $\text{H}_{16}$ ).  $^{13}\text{C}$  NMR (150 MHz,  $\text{CD}_3\text{OD}$ )  $\delta$  218.9 (C), 168.4 (C), 165.2 (C), 140.9 (2  $\times$  CH), 123.8 (2  $\times$  CH), 72.8 (CH), 70.5 (CH), 58.6 (CH), 46.6 (C), 45.7 ( $\text{CH}_2$ ), 43.2 (C), 42.8 (CH), 38.0 (CH), 38.0 ( $\text{CH}_2$ ), 36.2 ( $\text{CH}_2$ ), 35.4 ( $\text{CH}_2$ ), 35.1 ( $\text{CH}_2$ ), 35.0 ( $\text{CH}_2$ ), 35.0 (CH), 31.2 ( $\text{CH}_2$ ), 30.3 ( $\text{CH}_2$ ), 28.2 ( $\text{CH}_2$ ), 25.8 ( $\text{CH}_2$ ), 25.4 ( $\text{CH}_2$ ), 17.9 ( $\text{CH}_3$ ), 15.3 ( $\text{CH}_3$ ), 11.8 ( $\text{CH}_3$ ). IR (ATR-FTIR),  $\text{cm}^{-1}$ : 2924 (m), 2360 (s), 2341 (m), 1725 (w), 1624 (w). HRMS-ESI ( $m/z$ ):  $[\text{M} + \text{H}]^+$  calcd for  $[\text{C}_{29}\text{H}_{46}\text{N}_3\text{O}_5\text{S}]^+$  531.3131; found 531.3192.  $[\alpha]_D^{20} = -906.7$  ( $c = 0.015$ ,  $\text{CH}_3\text{OH}$ ).



Synthesis of the ketone **S68**.

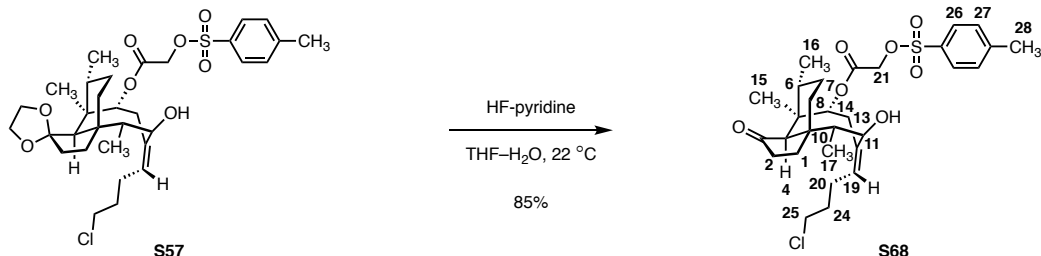

Hydrogen fluoride–pyridine complex (120  $\mu\text{L}$  811  $\mu\text{mol}$ , 2.00 equiv) was added to a solution of the ester **S57** (253 mg, 406  $\mu\text{mol}$ , 1 equiv) in tetrahydrofuran–water (2:1 v/v, 24 mL) at 22  $^\circ\text{C}$ . The reaction mixture was stirred for 16 h at 22  $^\circ\text{C}$ . A second portion of hydrogen fluoride–pyridine complex (376 mg, 811  $\mu\text{mol}$ , 2.00 equiv) was then added at 22  $^\circ\text{C}$ . The reaction mixture was stirred at 22  $^\circ\text{C}$  for 4 d. The product mixture was diluted with ethyl acetate (20 mL). The diluted product mixture was cooled to 0  $^\circ\text{C}$  over 20 min. Saturated aqueous sodium bicarbonate solution (20 mL) was then added dropwise over 5 min at 0  $^\circ\text{C}$ . The resulting biphasic mixture was warmed to 22  $^\circ\text{C}$  over 10 min. The warmed biphasic mixture was transferred to a separatory funnel and the layers that formed were separated. The aqueous later was extracted with ethyl acetate (3  $\times$  20 mL). The organic layers were combined and the combined organic layers were washed with saturated aqueous sodium chloride solution (40 mL). The washed organic layer was dried over magnesium sulfate. The dried solution was filtered and the filtrate was concentrated. The residue obtained was purified by flash-column chromatography (eluting with 15% ethyl acetate–hexanes initially, grading to 50% ethyl acetate–hexanes, four steps) to provide the ketone **S68** as a white solid (200 mg, 85%).

$R_f$  = 0.45 (50% ethyl acetate–hexanes; PAA).  $^1\text{H}$  NMR (600 MHz,  $\text{CDCl}_3$ )  $\delta$  7.83 (d,  $J$  = 8.1 Hz, 2H,  $\text{H}_{26}$ ), 7.36 (d,  $J$  = 8.0 Hz, 2H,  $\text{H}_{27}$ ), 6.00 (dd,  $J$  = 11.6, 5.1 Hz, 1H,  $\text{H}_{14}$ ), 5.38 (td,  $J$  = 7.0, 2.4, 1H,  $\text{H}_{19}$ ), 4.57–4.47 (m, 2H,  $\text{H}_{21}$ ), 3.99 (d,  $J$  = 9.4 Hz, 1H,  $\text{H}_{11}$ ), 3.52 (t,  $J$  = 6.3 Hz, 2H,  $\text{H}_{25}$ ), 3.14 (s, 1H,  $\text{H}_4$ ), 2.67 (dd,  $J$  = 15.3, 11.5 Hz, 1H,  $\text{H}_{13a}$ ), 2.45 (s, 3H,  $\text{H}_{28}$ ), 2.41 (ddd,  $J$  = 15.3, 5.0, 2.6 Hz, 1H,  $\text{H}_{13b}$ ), 2.30 (dq,  $J$  = 9.3, 6.4 Hz, 1H,  $\text{H}_{10}$ ), 2.24 (q,  $J$  = 7.5 Hz, 2H,  $\text{H}_{20}$ ), 2.11 (dd,  $J$  = 10.0, 5.8 Hz, 2H,  $\text{H}_2$ ), 1.85 (p,  $J$  = 6.9 Hz, 2H,  $\text{H}_{24}$ ), 1.71–1.46 (m, 5H,  $\text{H}_1$ ,  $\text{H}_6$ ,  $\text{H}_{7a}$ ,  $\text{H}_{8a}$ ), 1.44 (s, 3H,  $\text{H}_{15}$ ), 1.43–1.33 (m, 1H,  $\text{H}_{7b}$ ), 1.17 (d,  $J$  = 6.3 Hz, 3H,  $\text{H}_{17}$ ), 1.03 (td,  $J$  = 14.0, 4.6 Hz, 1H,  $\text{H}_{8b}$ ), 0.65 (d,  $J$  = 7.0 Hz, 3H,  $\text{H}_{16}$ ).  $^{13}\text{C}$  NMR (150 MHz,  $\text{CDCl}_3$ )  $\delta$  215.5 (C), 165.4 (C), 145.3 (C), 141.5 (C), 132.6 (C), 129.9 (2  $\times$  CH), 128.3 (2  $\times$  CH), 128.1 (CH), 83.3 (CH), 71.7 (CH), 64.8 (CH<sub>2</sub>), 59.5 (CH), 44.7 (C), 44.3 (CH<sub>2</sub>), 42.1 (C), 41.5 (CH), 36.7 (CH), 34.2 (CH<sub>2</sub>), 31.6 (CH<sub>2</sub>), 30.3 (CH<sub>2</sub>), 29.1 (CH<sub>2</sub>), 27.1 (CH<sub>2</sub>), 25.4 (CH<sub>2</sub>), 25.2 (CH<sub>2</sub>), 21.7 (CH<sub>3</sub>), 16.9 (CH<sub>3</sub>), 15.8 (CH<sub>3</sub>), 15.1 (CH<sub>3</sub>). IR (ATR-FTIR),  $\text{cm}^{-1}$ : 2924 (w), 1729 (w), 1190 (w), 1368 (w), 1024 (w). HRMS-ESI ( $m/z$ ):  $[\text{M} + \text{Na}]^+$  calcd for  $[\text{C}_{30}\text{H}_{41}\text{ClNaO}_7\text{S}]^+$  603.2159 found 603.2154.  $[\alpha]_D^{20}$  = +9.15 ( $c$  = 0.260,  $\text{CHCl}_3$ ).

### Synthesis of the epoxide **S69**.

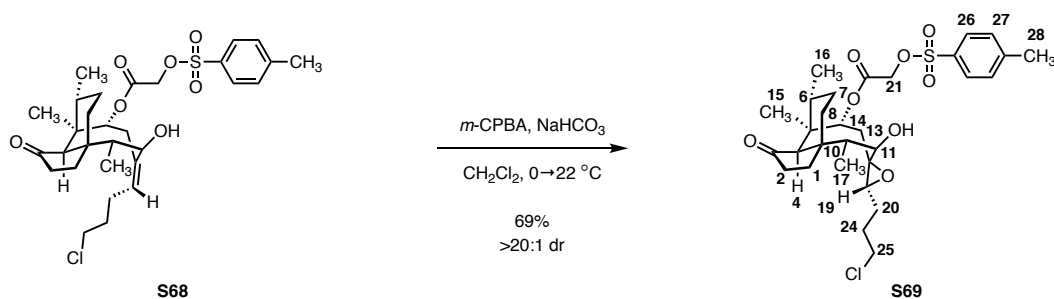

*Meta*-chloroperbenzoic acid (5.20 mg, 30.3  $\mu\text{mol}$ , 1.10 equiv) was added to a solution of sodium bicarbonate (4.60 mg, 55.1  $\mu\text{mol}$ , 2.00 equiv) and the alkene **S68** (16.0 mg, 27.5  $\mu\text{mol}$ , 1 equiv) in dichloromethane (1.1 mL) at 0  $^\circ\text{C}$ . The reaction mixture was stirred for 30 min at 0  $^\circ\text{C}$  and was then allowed to warm to 22  $^\circ\text{C}$  over 1 h. The warmed reaction mixture was stirred for 16 h at 22  $^\circ\text{C}$ . The product mixture was diluted sequentially with ether (3.0 mL) and saturated aqueous sodium bicarbonate solution (1.0 mL). The resulting biphasic mixture was transferred to a borosilicate test tube and the layers that formed were separated. The aqueous layer was extracted with ether (3  $\times$  1.0 mL). The organic layers were combined and the combined organic layers were washed sequentially with water (2.0 mL) and saturated aqueous sodium chloride solution (2.0 mL). The washed organic layer was dried over magnesium sulfate. The dried solution was filtered and the filtrate was concentrated. The residue obtained was purified by flash-column chromatography (eluting with 20% ethyl acetate–hexanes initially, grading to 50% ethyl acetate–hexanes, three steps) to provide the epoxide **S69** as a colorless oil (11.4 mg, 69%).

Within the limits of detection (600 MHz  $^1\text{H}$  analysis), the epoxide **S69** was formed as a single diastereomer. The relative stereochemistry of the C12 epoxide was determined by NOE correlations between H19 and H4 and NOE correlations between H19 and H1.

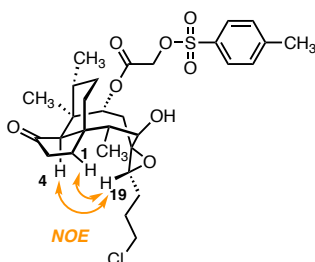

$R_f = 0.42$  (50% ethyl acetate–hexanes; PAA).  $^1\text{H}$  NMR (600 MHz,  $\text{CDCl}_3$ )  $\delta$  7.82 (d,  $J = 8.2$  Hz, 2H, H<sub>26</sub>), 7.35 (d,  $J = 8.0$  Hz, 2H, H<sub>27</sub>), 5.99 (dd,  $J = 11.3, 4.8$  Hz, 1H, H<sub>14</sub>), 4.52 (s, 2H, H<sub>21</sub>), 3.68 – 3.57 (m, 2H, H<sub>25</sub>), 3.07 (dd,  $J = 9.4, 3.2$  Hz, 1H, H<sub>11</sub>), 2.98 (dd,  $J = 9.0, 3.0$  Hz, 1H, H<sub>19</sub>), 2.46 (d,  $J = 6.4$  Hz, 4H, H<sub>4</sub>, H<sub>28</sub>), 2.41 (dq,  $J = 9.4, 6.5$  Hz, 1H, H<sub>10</sub>), 2.32 – 2.24 (m, 2H, H<sub>13a</sub>, OH), 2.21 (dd,  $J = 10.1, 5.9$  Hz, 2H, H<sub>2</sub>), 2.05 – 1.93 (m, 2H, H<sub>24</sub>), 1.89 (dddd,  $J = 14.6, 8.9, 5.9, 3.1$  Hz, 1H, H<sub>20a</sub>), 1.75 – 1.50 (m, 6H, H<sub>1a</sub>, H<sub>6</sub>, H<sub>7a</sub>, H<sub>8a</sub>, H<sub>13b</sub>, H<sub>20b</sub>), 1.50 – 1.42 (m, 4H, H<sub>1b</sub>, H<sub>15</sub>), 1.42 – 1.37 (m, 1H, H<sub>7b</sub>), 1.12 (d,  $J = 6.4$  Hz, 3H, H<sub>17</sub>), 1.08 (td,  $J = 14.0, 4.4$  Hz, 1H, H<sub>8b</sub>), 0.67 (d,  $J = 7.1$  Hz, 3H, H<sub>16</sub>).  $^{13}\text{C}$  NMR (150 MHz,  $\text{CDCl}_3$ )  $\delta$  214.9 (C), 165.0 (C), 145.4 (C), 132.5 (C), 129.9 (2  $\times$  CH), 128.1 (2  $\times$  CH), 81.0 (CH), 71.0 (CH), 67.5 (CH), 64.8 (CH<sub>2</sub>), 64.5 (C), 60.0

(CH), 44.5 (C), 44.1 (CH<sub>2</sub>), 41.3 (C), 40.7 (CH), 36.7 (CH), 34.2 (CH<sub>2</sub>), 30.2 (CH<sub>2</sub>), 29.6 (CH<sub>2</sub>), 29.4 (CH<sub>2</sub>), 26.9 (CH<sub>2</sub>), 26.4 (CH<sub>2</sub>), 25.3 (CH<sub>2</sub>), 21.7 (CH<sub>3</sub>), 16.7 (CH<sub>3</sub>), 15.6 (CH<sub>3</sub>), 14.9 (CH<sub>3</sub>). IR (ATR-FTIR), cm<sup>-1</sup>: 2917 (w), 2356 (w), 2341 (w), 1733 (w), 1041 (m), 800 (m). HRMS-ESI (m/z): [M + H]<sup>+</sup> calcd for [C<sub>30</sub>H<sub>42</sub>ClO<sub>8</sub>S]<sup>+</sup> 597.2289; found 597.2283.  $[\alpha]_D^{20} = +5.83$  ( $c = 0.096$ , CHCl<sub>3</sub>).

Synthesis of the pyridyl sulfide **67**.

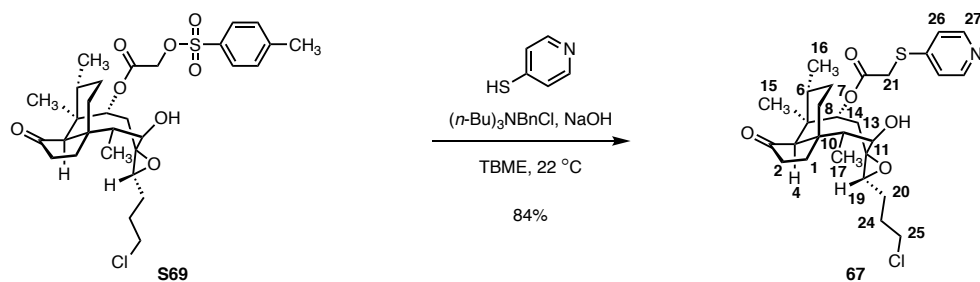

Aqueous sodium hydroxide solution (1 N, 22.0  $\mu\text{L}$ , 21.8  $\mu\text{mol}$ , 1.30 equiv) was added to a solution of 4-mercaptopyridine (2.40 mg, 21.8  $\mu\text{mol}$ , 1.30 equiv), benzyl tri-*n*-butylammonium chloride (400  $\mu\text{g}$ , 1.70  $\mu\text{mol}$ , 0.10 equiv), and the sulfonate **S69** (10.0 mg, 16.7  $\mu\text{mol}$ , 1 equiv) in *tert*-butyl methyl ether (260  $\mu\text{L}$ ) at 22  $^{\circ}\text{C}$ . The reaction mixture was stirred for 5 h at 22  $^{\circ}\text{C}$ . The product mixture was diluted sequentially with ethyl acetate (3.0 mL) and 1 N aqueous sodium hydroxide solution (1.0 mL). The resulting biphasic mixture was transferred to a separatory funnel and the layers that formed were separated. The aqueous layer was extracted with ethyl acetate (3  $\times$  2.0 mL). The organic layers were combined and the combined organic layers were washed sequentially with 0.1 N aqueous phosphoric acid solution (3.0 mL), saturated aqueous sodium bicarbonate solution (3.0 mL), and saturated aqueous sodium chloride solution (3.0 mL). The washed organic layer was dried over magnesium sulfate. The dried solution was filtered and the filtrate was concentrated. The residue obtained was purified by flash-column chromatography (eluting with 50% ethyl acetate–hexanes initially, grading to 80% ethyl acetate–hexanes, three steps) to provide the pyridyl sulfide **67** as a colorless foam (7.70 mg, 84%).

$R_f$  = 0.36 (80% ethyl acetate–hexanes; PAA).  $^1\text{H}$  NMR (400 MHz,  $\text{CD}_2\text{Cl}_2$ )  $\delta$  8.39 (d,  $J$  = 6.4 Hz, 2H, H<sub>27</sub>), 7.17 (d,  $J$  = 6.4 Hz, 2H, H<sub>26</sub>), 5.93 (dd,  $J$  = 11.4, 4.9 Hz, 1H, H<sub>14</sub>), 3.71 (d,  $J$  = 2.4 Hz, 2H, H<sub>21</sub>), 3.69 – 3.55 (m, 2H, H<sub>25</sub>), 3.06 (dd,  $J$  = 9.4, 3.1 Hz, 1H, H<sub>11</sub>), 2.98 (dd,  $J$  = 9.1, 3.0 Hz, 1H, H<sub>19</sub>), 2.45 (d,  $J$  = 3.0 Hz, 1H, H<sub>4</sub>), 2.42 – 2.31 (m, 2H, H<sub>10</sub>, OH), 2.28 – 2.13 (m, 3H, H<sub>13a</sub>, H<sub>2</sub>), 2.04 – 1.90 (m, 2H, H<sub>24</sub>), 1.90 – 1.77 (m, 1H, H<sub>20a</sub>), 1.75 – 1.60 (m, 3H, H<sub>1a</sub>, H<sub>6</sub>, H<sub>8a</sub>), 1.60 – 1.33 (m, 8H, H<sub>1b</sub>, H<sub>7</sub>, H<sub>13b</sub>, H<sub>15</sub>, H<sub>20b</sub>), 1.14 – 1.01 (m, 4H, H<sub>8b</sub>, H<sub>17</sub>), 0.73 (d,  $J$  = 7.0 Hz, 3H, H<sub>16</sub>).  $^{13}\text{C}$  NMR (100 MHz,  $\text{CD}_2\text{Cl}_2$ )  $\delta$  214.7 (C), 167.5 (C), 149.5 (2  $\times$  CH), 147.0 (C), 120.7 (2  $\times$  CH), 81.0 (CH), 71.1 (CH), 67.6 (CH), 64.3 (C), 59.9 (CH), 44.4 (C), 44.4 (CH<sub>2</sub>), 41.3 (C), 40.7 (CH), 36.8 (CH), 34.1 (CH<sub>2</sub>), 33.7 (CH<sub>2</sub>), 30.1 (CH<sub>2</sub>), 29.7 (CH<sub>2</sub>), 29.3 (CH<sub>2</sub>), 27.0 (CH<sub>2</sub>), 26.2 (CH<sub>2</sub>), 25.4 (CH<sub>2</sub>), 16.8 (CH<sub>3</sub>), 15.4 (CH<sub>3</sub>), 14.6 (CH<sub>3</sub>). IR (ATR-FTIR),  $\text{cm}^{-1}$ : 2926 (m), 1730 (m), 1276 (w). HRMS-ESI ( $m/z$ ):  $[\text{M} + \text{H}]^+$  calcd for  $[\text{C}_{28}\text{H}_{39}\text{ClNO}_5\text{S}]^+$  536.2237; found 536.2232.  $[\alpha]_D^{20}$  = +8.60 ( $c$  = 0.272,  $\text{CHCl}_3$ ).

Synthesis of the azide **S70**.

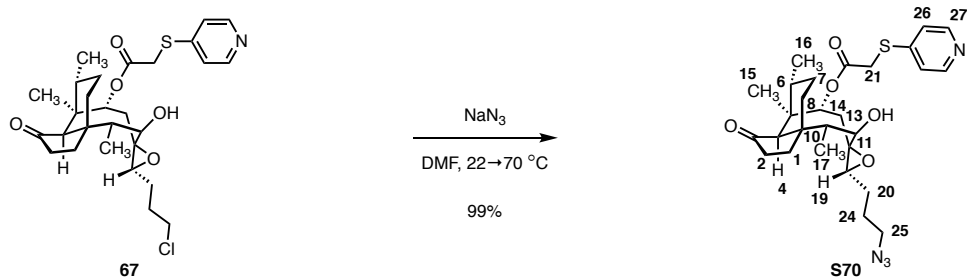

Sodium azide (1.00 mg, 15.4  $\mu\text{mol}$ , 3.40 equiv) was added to a solution of alkyl chloride **67** (3.00 mg, 4.50  $\mu\text{mol}$ , 1 equiv) in *N,N*-dimethylformamide (200  $\mu\text{L}$ ) at 22  $^{\circ}\text{C}$ . The reaction vessel was sealed and the sealed reaction vessel was placed in an oil bath that had been preheated to 70  $^{\circ}\text{C}$ . The reaction mixture was stirred for 3 h at 70  $^{\circ}\text{C}$ . The product mixture was cooled to 22  $^{\circ}\text{C}$  over 20 min. The cooled product mixture was diluted sequentially with ethyl acetate (3.0 mL) and water (1.0 mL). The resulting biphasic mixture was transferred to a borosilicate test tube and the layers that formed were separated. The organic layer was washed sequentially with water ( $2 \times 1.0$  mL) and saturated aqueous sodium chloride solution (2.0 mL). The washed organic layer was dried over sodium sulfate. The dried solution was filtered and the filtrate was concentrated. The residue obtained was purified by flash-column chromatography (eluting with 40% acetone–hexanes) to provide the azide **S70** as a fine white solid (2.50 mg, 99%).

$R_f = 0.36$  (80% ethyl acetate–hexanes; PAA).  $^1\text{H}$  NMR (600 MHz,  $\text{CD}_2\text{Cl}_2$ )  $\delta$  8.40 (d,  $J = 4.4$  Hz, 2H,  $\text{H}_{27}$ ), 7.18 (d,  $J = 4.4$  Hz, 2H,  $\text{H}_{26}$ ), 5.94 (dd,  $J = 11.5, 4.8$  Hz, 1H,  $\text{H}_{14}$ ), 3.72 (dd,  $J = 5.7, 1.7$  Hz, 2H,  $\text{H}_{21}$ ), 3.43 – 3.31 (m, 2H,  $\text{H}_{25}$ ), 3.06 (d,  $J = 9.4$  Hz, 1H,  $\text{H}_{11}$ ), 2.97 (d,  $J = 9.06$ , 1H,  $\text{H}_{19}$ ), 2.45 (d,  $J = 2.9$  Hz, 1H,  $\text{H}_4$ ), 2.40 – 2.34 (m, 2H,  $\text{H}_{10}$ , OH), 2.29 – 2.15 (m, 3H,  $\text{H}_2$ ,  $\text{H}_{13a}$ ), 1.86 – 1.62 (m, 5H,  $\text{H}_{1a}$ ,  $\text{H}_6$ ,  $\text{H}_{8a}$ ,  $\text{H}_{24}$ ), 1.56 – 1.36 (m, 9H,  $\text{H}_{1b}$ ,  $\text{H}_7$ ,  $\text{H}_{13b}$ ,  $\text{H}_{15}$ ,  $\text{H}_{20}$ ), 1.17 – 1.04 (m, 4H,  $\text{H}_{8b}$ ,  $\text{H}_{17}$ ), 0.74 (d,  $J = 7.1$  Hz, 3H,  $\text{H}_{16}$ ).  $^{13}\text{C}$  NMR (150 MHz,  $\text{CD}_2\text{Cl}_2$ )  $\delta$  214.7 (C), 167.5 (C), 149.4 ( $2 \times \text{CH}$ ), 147.0 (C), 120.7 ( $2 \times \text{CH}$ ), 81.1 (CH), 71.1 (CH), 67.8 (CH), 64.3 (C), 59.9 (CH), 50.9 ( $\text{CH}_2$ ), 44.4 (C), 41.3 (C), 40.7 (CH), 36.8 (CH), 34.1 ( $\text{CH}_2$ ), 33.7 ( $\text{CH}_2$ ), 30.1 ( $\text{CH}_2$ ), 29.3 ( $\text{CH}_2$ ), 27.0 ( $\text{CH}_2$ ), 26.3 ( $\text{CH}_2$ ), 26.2 ( $\text{CH}_2$ ), 25.3 ( $\text{CH}_2$ ), 16.8 ( $\text{CH}_3$ ), 15.4 ( $\text{CH}_3$ ), 14.6 ( $\text{CH}_3$ ). IR (ATR-FTIR),  $\text{cm}^{-1}$ : 2361 (w), 2341 (w), 1731 (w), 772 (s). HRMS-ESI ( $m/z$ ):  $[\text{M} + \text{H}]^+$  calcd for  $[\text{C}_{28}\text{H}_{39}\text{N}_4\text{O}_5\text{S}]^+$  543.2641; found 543.2636.  $[\alpha]_D^{20} = +8.53$  ( $c = 0.150$ ,  $\text{CHCl}_3$ ).

Synthesis of the triazole **68**.

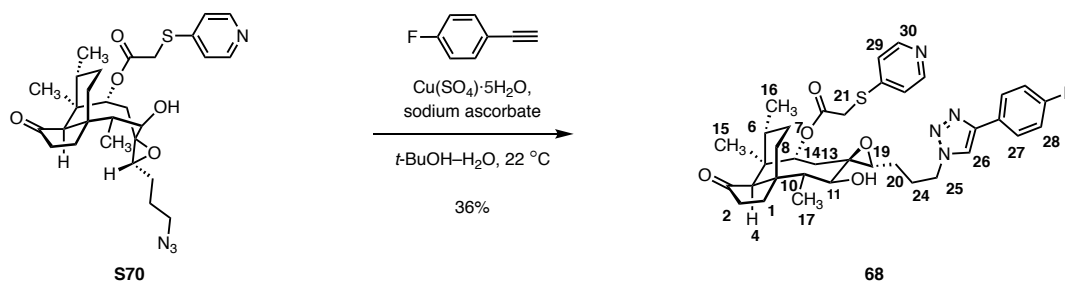

A solution of copper sulfate in water (10.0 mM, 13.0  $\mu\text{L}$ , 130 nmol, 3.0 mol%) and a solution of sodium ascorbate in water (100 mM, 13.0  $\mu\text{L}$ , 1.30  $\mu\text{mol}$ , 0.30 equiv) were added in sequence to a solution of 1-ethynyl-4-fluorobenzene (1.50 mg, 12.7  $\mu\text{mol}$ , 3.00 equiv) and the azide **S70** (2.30 mg, 4.20  $\mu\text{mol}$ , 1 equiv) in *tert*-butanol (200  $\mu\text{L}$ ) at 22  $^\circ\text{C}$ . The reaction mixture was stirred for 2 d at 22  $^\circ\text{C}$ . The product mixture was diluted sequentially with ethyl acetate (2.0 mL) and water (1.0 mL). The resulting biphasic mixture was transferred to a borosilicate test tube and the layers that formed were separated. The aqueous layer was extracted with ethyl acetate (2  $\times$  2.0 mL). The organic layers were combined and the combined organic layers were washed sequentially with water (2  $\times$  1.0 mL) and saturated aqueous sodium chloride solution (2.0 mL). The washed organic layer was dried over magnesium sulfate. The dried solution was filtered and the filtrate was concentrated. The residue obtained was purified by flash-column chromatography (eluting with 80 % ethyl acetate–hexanes) to provide the triazole **68** as a fine white solid (1.00 mg, 36%).

$R_f = 0.37$  (80% ethyl acetate–hexanes; PAA).  $^1\text{H NMR}$  (600 MHz,  $\text{CD}_2\text{Cl}_2$ )  $\delta$  8.39 (d,  $J = 6.3$  Hz, 2H, H<sub>30</sub>), 7.86 – 7.80 (m, 3H, H<sub>26</sub>, H<sub>27</sub>), 7.19 – 7.11 (m, 4H, H<sub>28</sub>, H<sub>29</sub>), 5.90 (dd,  $J = 11.3, 4.7$  Hz, 1H, H<sub>14</sub>), 4.51 (dt,  $J = 13.9, 7.0$  Hz, 1H, H<sub>25a</sub>), 4.42 (dt,  $J = 14.1, 7.2$  Hz, 1H, H<sub>25b</sub>), 3.73 – 3.63 (m, 2H, H<sub>21</sub>), 3.08 (dd,  $J = 9.3, 2.3$  Hz, 1H, H<sub>11</sub>), 3.02 (dd,  $J = 9.0, 3.0$  Hz, 1H, H<sub>19</sub>), 2.40 – 2.32 (m, 2H, H<sub>4</sub>, H<sub>10</sub>), 2.26 – 2.09 (m, 5H, H<sub>2</sub>, H<sub>13a</sub>, H<sub>24</sub>), 1.80 – 1.51 (m, 5H, H<sub>1a</sub>, H<sub>6</sub>, H<sub>8a</sub>, H<sub>13b</sub>, H<sub>20a</sub>), 1.50 – 1.36 (m, 7H, H<sub>1a</sub>, H<sub>7</sub>, H<sub>15</sub>, H<sub>20b</sub>), 1.13 – 1.04 (m, 4H, H<sub>8b</sub>, H<sub>17</sub>), 0.72 (d,  $J = 7.1$  Hz, 3H, H<sub>16</sub>).  $^{13}\text{C NMR}$  (150 MHz,  $\text{CD}_2\text{Cl}_2$ )  $\delta$  214.8 (C), 167.4 (C), 163.4 (C), 161.7 (C), 149.4 (2  $\times$  CH), 147.0 (C), 146.6 (C), 127.3 (d,  $J = 8.1$  Hz, 2  $\times$  CH), 120.8 (2  $\times$  CH), 119.7 (CH), 115.7 (d,  $J = 21.9$  Hz, 2  $\times$  CH), 80.6 (CH), 71.0 (CH), 67.2 (CH), 64.4 (C), 59.9 (CH), 49.4 (CH<sub>2</sub>), 44.5 (C), 41.3 (C), 40.6 (CH), 36.8 (CH), 34.1 (CH<sub>2</sub>), 33.7 (CH<sub>2</sub>), 30.1 (CH<sub>2</sub>), 29.4 (CH<sub>2</sub>), 27.7 (CH<sub>2</sub>), 26.9 (CH<sub>2</sub>), 26.2 (CH<sub>2</sub>), 24.9 (CH<sub>2</sub>), 16.8 (CH<sub>3</sub>), 15.4 (CH<sub>3</sub>), 14.4 (CH<sub>3</sub>).  $^{19}\text{F NMR}$  (470 MHz,  $\text{CD}_2\text{Cl}_2$ )  $\delta$  –114.7. IR (ATR-FTIR),  $\text{cm}^{-1}$ : 2362 (m), 2341 (m), 1732 (w), 773 (w). HRMS-ESI ( $m/z$ ): [ $\text{M} + \text{H}$ ] $^+$  calcd for  $[\text{C}_{36}\text{H}_{44}\text{FN}_4\text{O}_5\text{S}]^+$  663.3016; found 663.3015.  $[\alpha]_D^{20} = +18.0$  ( $c = 0.051$ ,  $\text{CHCl}_3$ ).

Synthesis of the pyridyl sulfide **69**.

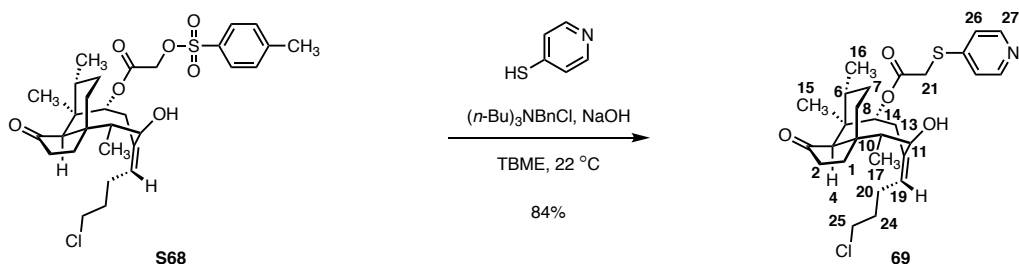

Aqueous sodium hydroxide solution (1 N, 54.0  $\mu\text{L}$ , 53.7  $\mu\text{mol}$ , 1.30 equiv) was added to a solution of 4-mercaptopyridine (6.00 mg, 53.7  $\mu\text{mol}$ , 1.30 equiv), benzyl tri-*n*-butylammonium chloride (900  $\mu\text{g}$ , 4.10  $\mu\text{mol}$ , 0.10 equiv) and the sulfonate **S68** (24.0 mg, 41.3  $\mu\text{mol}$ , 1 equiv) in *tert*-butyl methyl ether (1.0 mL) at 22 °C. The reaction mixture was stirred for 5 h at 22 °C. The product mixture was diluted sequentially with ethyl acetate (3.0 mL) and 1 N aqueous sodium hydroxide solution (1.0 mL). The resulting biphasic mixture was transferred to a separatory funnel and the layers that formed were separated. The aqueous layer was extracted with ethyl acetate ( $3 \times 2.0$  mL). The organic layers were combined and the combined organic layers were washed sequentially with 0.1 N aqueous phosphoric acid solution (3.0 mL), saturated aqueous sodium bicarbonate solution (3.0 mL), and saturated aqueous sodium chloride solution (3.0 mL). The washed organic layer was dried over magnesium sulfate. The dried solution was filtered and the filtrate was concentrated. The residue obtained was purified by flash-column chromatography (eluting with 50% ethyl acetate–hexanes initially, grading to 80% ethyl acetate–hexanes, three steps) to provide the pyridyl sulfide **69** as a colorless foam (18.0 mg, 84 %).

$R_f = 0.25$  (70% ethyl acetate–hexanes; PAA).  $^1\text{H NMR}$  (600 MHz,  $\text{CD}_2\text{Cl}_2$ )  $\delta$  8.40 (d,  $J = 6.3$  Hz, 2H,  $\text{H}_{27}$ ), 7.19 (d,  $J = 6.3$  Hz, 2H,  $\text{H}_{26}$ ), 5.95 (dd,  $J = 11.5, 5.2$  Hz, 1H,  $\text{H}_{14}$ ), 5.36 (td,  $J = 6.9, 2.6$  Hz, 1H,  $\text{H}_{19}$ ), 3.99 (d,  $J = 9.5$  Hz, 1H,  $\text{H}_{11}$ ), 3.82 – 3.68 (m, 2H,  $\text{H}_{21}$ ), 3.53 (t,  $J = 6.4$  Hz, 2H,  $\text{H}_{25}$ ), 3.12 (d,  $J = 2.9$  Hz, 1H,  $\text{H}_4$ ), 2.57 (dd,  $J = 15.2, 11.5$  Hz, 1H,  $\text{H}_{13a}$ ), 2.35 (dd,  $J = 16.2, 4.1$  Hz, 1H,  $\text{H}_{13b}$ ), 2.28 (dq,  $J = 9.5, 6.5$  Hz, 1H,  $\text{H}_{10}$ ), 2.23 – 2.13 (m, 2H,  $\text{H}_{20}$ ), 2.08 (dd,  $J = 9.8, 6.0$  Hz, 2H,  $\text{H}_2$ ), 1.95 (s, 1H, OH), 1.87 – 1.76 (m, 2H,  $\text{H}_{24}$ ), 1.72 – 1.48 (m, 5H,  $\text{H}_1, \text{H}_6, \text{H}_{7a}, \text{H}_{8a}$ ), 1.45 (s, 3H,  $\text{H}_{15}$ ), 1.44 – 1.32 (m, 1H,  $\text{H}_{7b}$ ), 1.15 (d,  $J = 6.3$  Hz, 3H,  $\text{H}_{17}$ ), 1.10 – 0.97 (m, 1H,  $\text{H}_{8b}$ ), 0.73 (d,  $J = 6.8$  Hz, 3H,  $\text{H}_{16}$ ).  $^{13}\text{C NMR}$  (150 MHz,  $\text{CD}_2\text{Cl}_2$ )  $\delta$  215.2 (C), 167.8 (C), 149.4 ( $2 \times \text{CH}$ ), 147.2 (C), 141.6 (C), 128.2 ( $2 \times \text{CH}$ ), 120.7 (CH), 83.1 (CH), 71.7 (CH), 59.3 (CH), 44.6 ( $\text{CH}_2$ ), 44.6 (C), 42.1 (C), 41.2 (CH), 36.8 (CH), 34.1 ( $\text{CH}_2$ ), 33.8 ( $\text{CH}_2$ ), 31.6 ( $\text{CH}_2$ ), 30.2 ( $\text{CH}_2$ ), 28.9 ( $\text{CH}_2$ ), 27.1 ( $\text{CH}_2$ ), 25.3 ( $\text{CH}_2$ ), 25.2 ( $\text{CH}_2$ ), 16.9 ( $\text{CH}_3$ ), 15.6 ( $\text{CH}_3$ ), 14.7 ( $\text{CH}_3$ ). IR (ATR-FTIR),  $\text{cm}^{-1}$ : 2360 (s), 2341 (m), 669 (w). HRMS-ESI ( $m/z$ ):  $[\text{M} + \text{H}]^+$  calcd for  $[\text{C}_{28}\text{H}_{39}\text{ClNO}_4\text{S}]^+$ , 520.2288 found 520.2283.  $[\alpha]_D^{20} = -725.2$  ( $c = 0.260$ ,  $\text{CHCl}_3$ ).

Synthesis of the azide **S71**.

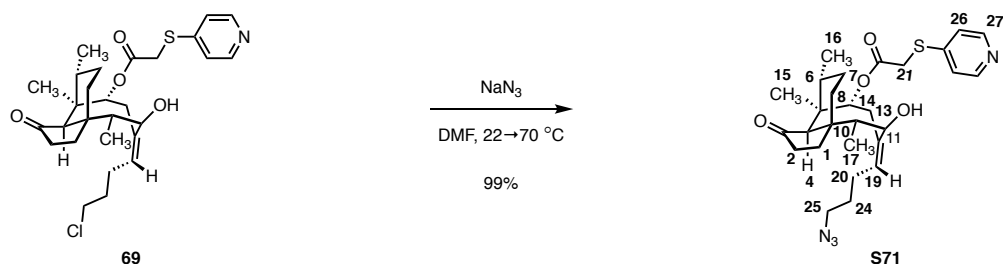

Sodium azide (3.00 mg, 46.1  $\mu\text{mol}$ , 5.00 equiv) was added to a solution of alkyl chloride **69** (6.00 mg, 9.20  $\mu\text{mol}$ , 1 equiv) in *N,N*-dimethylformamide (200  $\mu\text{L}$ ) at 22  $^\circ\text{C}$ . The reaction vessel was sealed and the sealed reaction vessel was placed in an oil bath that had been preheated to 70  $^\circ\text{C}$ . The reaction mixture was stirred at 3 h at 70  $^\circ\text{C}$ . The product mixture was cooled to 22  $^\circ\text{C}$  over 10 min. The cooled product mixture was diluted sequentially with ethyl acetate (4.0 mL) and water (1.0 mL). The resulting biphasic mixture was transferred to a borosilicate test tube and the layers that formed were separated. The organic layer was washed sequentially with water (1.0 mL) and saturated aqueous sodium chloride solution (1.5 mL). The washed organic layer was dried over sodium sulfate. The dried solution was filtered and the filtrate was concentrated. The residue obtained was purified by flash-column chromatography (eluting with 40% acetone–hexanes) to provide the azide **S71** as a fine, white solid (4.90 mg, 99%).

$R_f = 0.25$  (70% ethyl acetate–hexanes; PAA).  $^1\text{H}$  NMR (400 MHz,  $\text{CD}_2\text{Cl}_2$ )  $\delta$  8.41 (s, 2H, H<sub>27</sub>), 7.19 (d,  $J = 5.4$  Hz, 2H, H<sub>26</sub>), 5.95 (dd,  $J = 11.4, 5.3$  Hz, 1H, H<sub>14</sub>), 5.37 (td,  $J = 7.0, 2.6$  Hz 1H, H<sub>19</sub>), 3.99 (d,  $J = 9.5$  Hz, 1H, H<sub>11</sub>), 3.81 – 3.67 (m, 2H, H<sub>21</sub>), 3.26 (td,  $J = 6.6, 3.0$  Hz, 2H, H<sub>25</sub>), 3.12 (d,  $J = 2.9$  Hz, 1H, H<sub>4</sub>), 2.62 – 2.49 (m, 1H, H<sub>13a</sub>), 2.41 – 2.31 (m, 1H, H<sub>13b</sub>), 2.27 (dq,  $J = 9.5, 6.5$  Hz, 1H, H<sub>10</sub>), 2.10 (ddd,  $J = 15.9, 10.0, 7.2$  Hz, 4H, H<sub>2</sub>, H<sub>20</sub>), 1.76 – 1.20 (m, 7H, H<sub>1</sub>, H<sub>6</sub>, H<sub>7a</sub>, H<sub>8a</sub>, H<sub>24</sub>), 1.48 – 1.20 (m, 4H, H<sub>7b</sub>, H<sub>15</sub>), 1.15 (d,  $J = 6.4$  Hz, 3H, H<sub>17</sub>), 1.03 (td,  $J = 6.8$  Hz, 1H, H<sub>8b</sub>), 0.73 (d,  $J = 6.8$  Hz, 3H, H<sub>16</sub>).  $^{13}\text{C}$  NMR (150 MHz,  $\text{CD}_2\text{Cl}_2$ )  $\delta$  215.3 (C), 167.8 (C), 149.4 (2  $\times$  CH), 147.2 (C), 141.4 (C), 128.5 (2  $\times$  CH), 120.8 (CH), 83.1 (CH), 71.7 (CH), 59.3 (CH), 51.0 (CH<sub>2</sub>), 44.6 (C), 42.1 (C), 41.1 (CH), 36.8 (CH), 34.1 (CH<sub>2</sub>), 33.8 (CH<sub>2</sub>), 30.2 (CH<sub>2</sub>), 28.9 (CH<sub>2</sub>), 28.0 (CH<sub>2</sub>), 27.1 (CH<sub>2</sub>), 25.3 (CH<sub>2</sub>), 25.1 (CH<sub>2</sub>), 16.9 (CH<sub>3</sub>), 15.6 (CH<sub>3</sub>), 14.7 (CH<sub>3</sub>). IR (ATR-FTIR),  $\text{cm}^{-1}$ : 2936 (w), 2360 (s), 2340 (m). HRMS-ESI ( $m/z$ ):  $[\text{M} + \text{H}]^+$  calcd for  $[\text{C}_{28}\text{H}_{39}\text{N}_4\text{O}_4\text{S}]$  527.2692; found 527.2687.  $[\alpha]_D^{20} = -25.3$  ( $c = 0.117$ ,  $\text{CHCl}_3$ ).



Synthesis of the amine **70**.

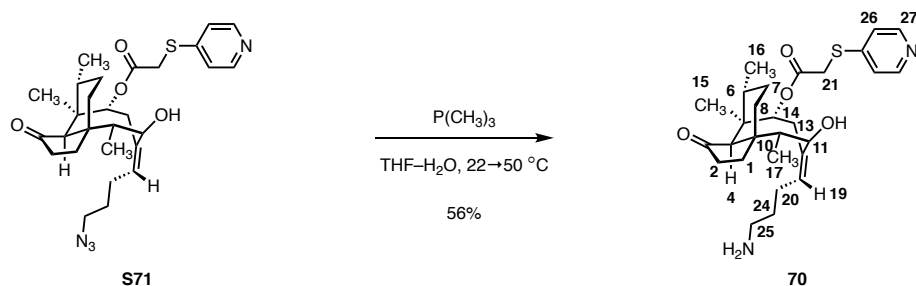

A solution trimethylphosphine in tetrahydrofuran (1.0 M, 19.0  $\mu\text{L}$ , 18.6  $\mu\text{mol}$ , 2.00 equiv) was added to a solution of the azide **S71** (4.90 mg, 9.30  $\mu\text{mol}$ , 1 equiv) in tetrahydrofuran–water (4:1 v/v, 200  $\mu\text{L}$ ) at 22  $^{\circ}\text{C}$ . The reaction vessel was sealed and the sealed reaction vessel was placed in an oil bath that had been preheated to 50  $^{\circ}\text{C}$ . The reaction mixture was stirred for 3 h at 50  $^{\circ}\text{C}$ . The product mixture was cooled to 22  $^{\circ}\text{C}$  over 5 min. The cooled product mixture was diluted sequentially with ethyl acetate (1.0 mL) and aqueous sodium thiosulfate solution (10% w/v, 1.0 mL). The resulting biphasic mixture was transferred to a borosilicate test tube and the layers that formed were separated. The aqueous layer was extracted with ethyl acetate ( $2 \times 1.0$  mL). The organic layers were combined and the combined organic layers were washed sequentially with water (2.0 mL) and saturated aqueous sodium chloride solution (2.0 mL). The washed organic layer was dried over magnesium sulfate. The dried solution was filtered and the filtrate was concentrated to provide the amine **70** as a fine white solid (2.60 mg, 56%). The product obtained in this way was judged to be of >95% purity (400 MHz  $^1\text{H}$  NMR analysis) and was used in susceptibility testing without further purification.

$R_f = 0.05$  (95% ethyl acetate–hexanes; PAA).  $^1\text{H}$  NMR (400 MHz,  $\text{CD}_2\text{Cl}_2$ )  $\delta$  8.39 (d,  $J = 6.3$  Hz, 2H,  $\text{H}_{27}$ ), 7.19 (d,  $J = 6.3$  Hz, 2H,  $\text{H}_{26}$ ), 5.95 (dd,  $J = 11.5, 5.2$  Hz, 1H,  $\text{H}_{14}$ ), 5.38 (td,  $J = 7.1, 2.7$  Hz, 1H,  $\text{H}_{19}$ ), 3.98 (d,  $J = 9.5$  Hz, 1H,  $\text{H}_{11}$ ), 3.80 – 3.67 (m, 2H,  $\text{H}_{21}$ ), 3.18 (d,  $J = 2.9$  Hz, 1H,  $\text{H}_4$ ), 2.62 (t,  $J = 7.0$  Hz, 2H,  $\text{H}_{25}$ ), 2.54 (dd,  $J = 5.1, 11.5$  Hz, 1H,  $\text{H}_{13a}$ ), 2.39 – 2.14 (m, 2H,  $\text{H}_{10}, \text{H}_{13b}$ ), 2.11 – 1.98 (m, 4H,  $\text{H}_2, \text{H}_{20}$ ), 1.86 – 1.21 (m, 11H,  $\text{H}_1, \text{H}_6, \text{H}_7, \text{H}_{8a}, \text{H}_{15}, \text{H}_{24}$ ), 1.15 (d,  $J = 6.4$  Hz, 3H,  $\text{H}_{17}$ ), 1.09 – 0.96 (m, 1H,  $\text{H}_{8b}$ ), 0.72 (d,  $J = 6.6$  Hz, 3H,  $\text{H}_{16}$ ).  $^{13}\text{C}$  NMR (150 MHz,  $\text{CD}_2\text{Cl}_2$ )  $\delta$  215.4 (C), 167.8 (C), 149.4 ( $2 \times \text{CH}$ ), 147.3 (C), 140.4 (C), 129.8 (CH), 120.7 ( $2 \times \text{CH}$ ), 83.2 (CH), 71.8 (CH), 59.2 (CH), 44.6 (C), 42.1 (C), 41.7 ( $\text{CH}_2$ ), 41.1 (CH), 36.8 (CH), 34.1 ( $\text{CH}_2$ ), 33.8 ( $\text{CH}_2$ ), 32.7 ( $\text{CH}_2$ ), 30.2 ( $\text{CH}_2$ ), 28.9 ( $\text{CH}_2$ ), 27.2 ( $\text{CH}_2$ ), 25.3 ( $\text{CH}_2$ ), 25.3 ( $\text{CH}_2$ ), 16.9 ( $\text{CH}_3$ ), 15.6 ( $\text{CH}_3$ ), 14.7 ( $\text{CH}_3$ ). IR (ATR-FTIR),  $\text{cm}^{-1}$ : 2921 (w), 2360 (s), 2341 (m), 1732 (w), 1219 (w), 772 (s). HRMS-ESI ( $m/z$ ):  $[\text{M} + \text{H}]^+$  calcd for  $[\text{C}_{28}\text{H}_{41}\text{N}_2\text{O}_4\text{S}]^+$  501.2787; found 501.2775.  $[\alpha]_D^{20} = -5.71$  ( $c = 0.063$ ,  $\text{CHCl}_3$ ).

Synthesis of the ketone **71**.

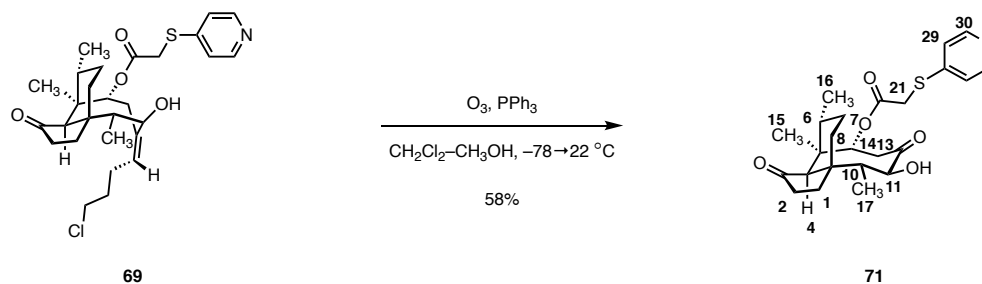

Ozone was passed through a solution of the allylic alcohol **69** (4.00 mg, 7.72  $\mu\text{mol}$ , 1 equiv) in dichloromethane–methanol (2:1 v/v, 800  $\mu\text{L}$ ) at  $-78 \text{ }^\circ\text{C}$ . The addition of ozone was continued until a blue color persisted. Dioxygen was then passed through the solution to remove any dissolved ozone, resulting in a colorless solution. Triphenylphosphine (4.04 mg, 15.4  $\mu\text{mol}$ , 2.00 equiv) was then added to the cold mixture. Upon completion of the addition, the cooling bath was removed and the product mixture was allowed to warm to  $22 \text{ }^\circ\text{C}$  over 1 h. The warmed product mixture was concentrated. The residue obtained was purified by flash-column chromatography (eluting with 70% ethyl acetate–hexanes) to provide the ketone **71** as a white solid (2.00 mg, 58%).

$R_f = 0.25$  (80% ethyl acetate–hexanes; PAA).  $^1\text{H NMR}$  (600 MHz,  $\text{CD}_2\text{Cl}_2$ )  $\delta$  8.41 (d,  $J = 6.3 \text{ Hz}$ , 2H, H<sub>30</sub>), 7.18 (d,  $J = 6.4 \text{ Hz}$ , 2H, H<sub>29</sub>), 5.81 (dd,  $J = 10.3, 3.2 \text{ Hz}$ , 1H, H<sub>14</sub>), 3.97 (dd,  $J = 9.8, 4.9 \text{ Hz}$ , 1H, H<sub>11</sub>), 3.74 (d,  $J = 5.2 \text{ Hz}$ , 2H, H<sub>21</sub>), 3.16 (d,  $J = 5.5 \text{ Hz}$ , 1H, OH), 2.82 – 2.66 (m, 2H, H<sub>13</sub>), 2.42 (dd,  $J = 9.7, 6.7 \text{ Hz}$ , 1H, H<sub>10</sub>), 2.21 (dr,  $J = 19.6, 10.6 \text{ Hz}$ , 2H, H<sub>2</sub>), 2.07 (d,  $J = 3.0 \text{ Hz}$ , 1H, H<sub>4</sub>), 1.88 – 1.62 (m, 3H, H<sub>1a</sub>, H<sub>6</sub>, H<sub>8a</sub>), 1.61 – 1.57 (m, 1H, H<sub>1b</sub>), 1.45 (s, 5H, H<sub>7</sub>, H<sub>15</sub>), 1.20 – 1.12 (m, 1H, H<sub>8b</sub>), 1.06 (d,  $J = 6.7 \text{ Hz}$ , 3H, H<sub>17</sub>), 0.76 (d,  $J = 7.1 \text{ Hz}$ , 3H, H<sub>16</sub>).  $^{13}\text{C NMR}$  (150 MHz,  $\text{CD}_2\text{Cl}_2$ )  $\delta$  215.1 (C), 207.6 (C), 168.1 (C), 149.9 (C), 147.7 (2  $\times$  CH), 121.1 (2  $\times$  CH), 78.3 (CH), 70.1 (CH), 59.8 (CH), 45.3 (C), 44.6 (CH<sub>2</sub>), 42.4 (C), 39.5 (CH), 37.1 (CH), 34.5 (CH<sub>2</sub>), 34.1 (CH<sub>2</sub>), 30.5 (CH<sub>2</sub>), 27.3 (CH<sub>2</sub>), 25.6 (CH<sub>2</sub>), 17.5 (CH<sub>3</sub>), 15.1 (CH<sub>3</sub>), 12.8 (CH<sub>3</sub>). IR (ATR-FTIR),  $\text{cm}^{-1}$ : 2919 (m), 2367 (s), 1736 (m), 1190 (m), 1044 (w), 772 (m). HRMS-ESI ( $m/z$ ):  $[\text{M} + \text{H}]^+$  calcd for  $[\text{C}_{24}\text{H}_{32}\text{NO}_5\text{S}]^+$  446.2001; found 446.1996.  $[\alpha]_D^{20} = +45.0$  ( $c = 0.016$ ,  $\text{CHCl}_3$ ).

### Synthesis of the sulfide **S72**.

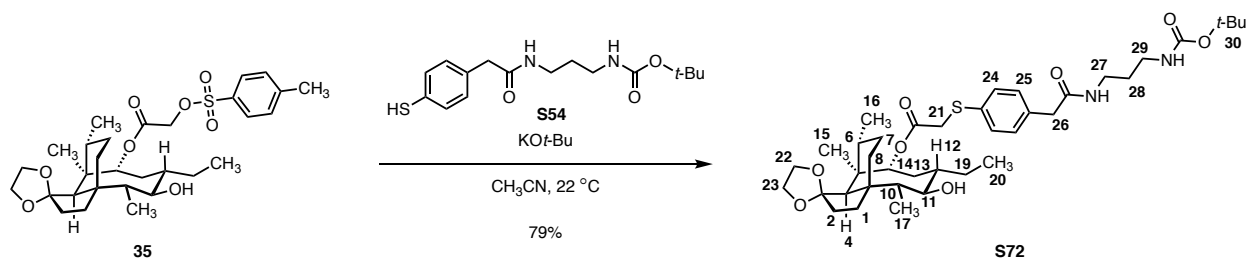

A solution of potassium *tert*-butoxide in tetrahydrofuran (50 mM, 28.0  $\mu$ L, 14.2  $\mu$ mol, 0.80 equiv) was added dropwise to a solution of the thiol **S54** (4.60 mg, 14.2  $\mu$ mol, 0.80 equiv), and the sulfonate **35** (14.0 mg, 24.8  $\mu$ mol, 1 equiv) in acetonitrile (200  $\mu$ L) at 22 °C. The reaction mixture was stirred for 2 h at 22 °C. The product mixture was diluted sequentially with dichloromethane (1.0 mL) and 1 N aqueous sodium hydroxide solution (1.0 mL). The resulting biphasic mixture was transferred to a separatory funnel and the layers that formed were separated. The aqueous layer was extracted with ethyl acetate (2  $\times$  1.0 mL). The organic layers were combined and the combined organic layers were washed sequentially with aqueous sodium thiosulfate solution (10% w/v, 1.0 mL), saturated aqueous sodium bicarbonate solution (1.0 mL), and saturated aqueous sodium chloride solution (1.0 mL). The washed organic layer was dried over magnesium sulfate. The dried solution was filtered and the filtrate was concentrated. The residue obtained was purified by flash-column chromatography (eluting with 30% acetone–hexanes initially, grading to 80% acetone–hexanes, three steps) to provide the sulfide **S72** as a white foam (8.00 mg, 79%).

$R_f$  = 0.25 (65% acetone–hexanes; PAA). <sup>1</sup>H NMR (600 MHz, CDCl<sub>3</sub>)  $\delta$  7.35 (d,  $J$  = 7.7 Hz, 2H, H<sub>24</sub>), 7.19 (d,  $J$  = 7.8 Hz, 2H, H<sub>25</sub>), 6.11 (s, 1H, NH), 5.29 (d,  $J$  = 8.1 Hz, 1H, H<sub>14</sub>), 4.88 (s, 1H, NH), 4.02 (q,  $J$  = 6.6, 5.9 Hz, 1H, H<sub>22a</sub> or <sub>23a</sub>), 3.88 (tq,  $J$  = 13.7, 6.9 Hz, 2H, H<sub>22b</sub>, H<sub>23b</sub>), 3.77 – 3.71 (m, 1H, H<sub>22a</sub> or <sub>23a</sub>), 3.58 (s, 2H, H<sub>21</sub>), 3.51 (s, 2H, H<sub>26</sub>), 3.31 (dd,  $J$  = 10.1, 6.9 Hz, 1H, H<sub>11</sub>), 3.24 (q,  $J$  = 6.3 Hz, 2H, H<sub>27</sub>), 3.08 (d,  $J$  = 6.5 Hz, 2H, H<sub>29</sub>), 2.21 (ddd,  $J$  = 11.7, 7.2, 4.9 Hz, 1H, H<sub>6</sub>), 2.18 – 2.07 (m, 1H, H<sub>10</sub>), 1.95 (s, 1H, H<sub>4</sub>), 1.81 (qtd,  $J$  = 14.5, 9.4, 5.1 Hz, 3H, H<sub>2</sub>, H<sub>13a</sub>), 1.76 – 1.64 (m, 2H, H<sub>12</sub>, H<sub>19a</sub>), 1.56 (dp,  $J$  = 10.4, 5.8, 5.2 Hz, 5H, H<sub>1</sub>, H<sub>7a</sub>, H<sub>28</sub>), 1.49 – 1.20 (m, 14H, H<sub>7b</sub>, H<sub>8</sub>, H<sub>13b</sub>, H<sub>19b</sub>, H<sub>30</sub>), 1.03 (s, 3H, H<sub>15</sub>), 0.88 (d,  $J$  = 6.8 Hz, 3H, H<sub>17</sub>), 0.81 (t,  $J$  = 7.4 Hz, 3H, H<sub>20</sub>), 0.66 (d,  $J$  = 7.1 Hz, 3H, H<sub>16</sub>). <sup>13</sup>C NMR (150 MHz, CDCl<sub>3</sub>)  $\delta$  171.1 (C), 169.0 (C), 156.5 (C), 134.3 (C), 133.5 (C), 130.1 (2  $\times$  CH), 130.0 (2  $\times$  CH), 120.4 (C), 79.4 (C), 75.5 (CH), 71.7 (CH), 63.8 (CH<sub>2</sub>), 61.5 (CH<sub>2</sub>), 51.0 (CH), 47.9 (CH), 46.2 (C), 43.3 (CH<sub>2</sub>), 41.6 (C), 40.0 (CH), 37.1 (CH<sub>2</sub>), 36.6 (CH<sub>2</sub>), 36.2 (CH<sub>2</sub>), 35.8 (CH<sub>2</sub>), 35.4 (CH), 30.1 (CH<sub>2</sub>), 29.3 (CH<sub>2</sub>), 29.3 (CH<sub>2</sub>), 28.7 (CH<sub>2</sub>), 28.4 (3  $\times$  CH<sub>3</sub>), 27.2 (CH<sub>2</sub>), 25.8 (CH<sub>2</sub>), 17.7 (CH<sub>3</sub>), 14.7 (CH<sub>3</sub>), 11.5 (CH<sub>3</sub>), 10.5 (CH<sub>3</sub>). IR (AT-FTIR), cm<sup>-1</sup>: 3324 (w), 2936 (m), 2876 (w), 1695 (m), 1655 (m), 1278 (m), 1162 (m), 755 (s). HRMS-ESI (m/z): [M + Na]<sup>+</sup> calcd for [C<sub>39</sub>H<sub>60</sub>N<sub>2</sub>NaO<sub>8</sub>S]<sup>+</sup> 739.3968; found 739.3958.  $[\alpha]_D^{20}$  = +10.4 ( $c$  = 0.425, CHCl<sub>3</sub>).

## Synthesis of the amido amine **72**.

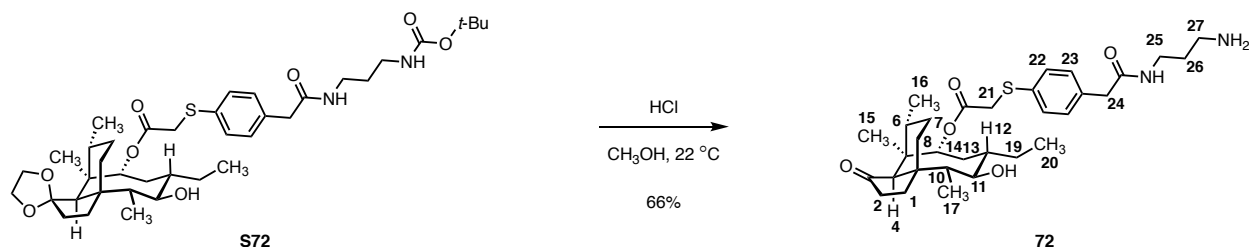

Aqueous hydrochloric acid solution (12 N, 11.8  $\mu\text{L}$ , 142  $\mu\text{mol}$ , 10.0 equiv) was added to a solution of the ester **S72** (8.00 mg, 14.2  $\mu\text{mol}$ , 1 equiv) in methanol (200  $\mu\text{L}$ ) at 22 °C. The reaction mixture was stirred for 72 h at 22 °C. The product mixture was concentrated to provide the amido amine **72** as a fine, white solid (4.20 mg, 66%). The product obtained in this way was judged to be of >95% purity (600 MHz <sup>1</sup>H NMR analysis) and was used in susceptibility testing without further purification.

$R_f = 0.05$  (95% ethyl acetate–hexanes; PAA). <sup>1</sup>H NMR (600 MHz, CD<sub>3</sub>OD)  $\delta$  7.36 (d,  $J = 8.1$  Hz, 2H, H<sub>22</sub>), 7.24 (d,  $J = 8.0$  Hz, 2H, H<sub>23</sub>), 5.33 (d,  $J = 7.5$  Hz, 1H, H<sub>14</sub>), 3.69 (d,  $J = 15.1$  Hz, 1H, H<sub>21a</sub>), 3.61 (d,  $J = 15.2$  Hz, 1H, H<sub>21b</sub>), 3.48 (s, 2H, H<sub>24</sub>), 3.35 – 3.23 (m, 3H, H<sub>11</sub>, H<sub>25</sub>), 2.87 (t,  $J = 7.3$  Hz, 2H, H<sub>27</sub>), 2.33 – 2.05 (m, 4H, H<sub>2</sub>, H<sub>4</sub>, H<sub>10</sub>), 1.88 – 1.53 (m, 8H, H<sub>1a</sub>, H<sub>6</sub>, H<sub>8a</sub>, H<sub>12</sub>, H<sub>13a</sub>, H<sub>19a</sub>, H<sub>26</sub>), 1.49 – 1.20 (m, 8H, H<sub>1b</sub>, H<sub>7</sub>, H<sub>13b</sub>, H<sub>15</sub>, H<sub>19b</sub>), 1.17 – 1.06 (m, 1H, H<sub>8b</sub>), 0.95 (d,  $J = 7.0$  Hz, 3H, H<sub>17</sub>), 0.80 (t,  $J = 7.4$  Hz, 3H, H<sub>20</sub>), 0.70 (d,  $J = 7.1$  Hz, 3H, H<sub>16</sub>). <sup>13</sup>C NMR (150 MHz, CD<sub>3</sub>OD)  $\delta$  218.3 (C), 173.2 (C), 169.6 (C), 134.2 (C), 133.7 (C), 129.6 (2  $\times$  CH), 129.4 (2  $\times$  CH), 74.0 (CH), 70.8 (CH), 57.7 (CH), 47.3 (CH), 45.3 (C), 41.8 (CH<sub>2</sub>), 41.3 (CH), 41.2 (C), 36.8 (CH<sub>2</sub>), 36.7 (CH), 36.1 (CH<sub>2</sub>), 35.9 (CH<sub>2</sub>), 35.6 (CH<sub>2</sub>), 33.8 (CH<sub>2</sub>), 30.3 (CH<sub>2</sub>), 27.4 (CH<sub>2</sub>), 26.8 (CH<sub>2</sub>), 25.3 (CH<sub>2</sub>), 24.8 (CH<sub>2</sub>), 16.5 (CH<sub>3</sub>), 14.1 (CH<sub>3</sub>), 10.3 (CH<sub>3</sub>), 9.4 (CH<sub>3</sub>). IR (AT-FTIR), cm<sup>-1</sup>: 3730 (w), 3383 (w), 2361 (s), 2341 (s), 1718 (w), 1648 (w), 669 (w). HRMS-ESI (m/z): [M + H]<sup>+</sup> calcd for [C<sub>32</sub>H<sub>49</sub>N<sub>2</sub>O<sub>5</sub>S]<sup>+</sup> 573.3362; found 573.3355.  $[\alpha]_D^{20} = +39.9$  ( $c = 0.263$ , CH<sub>3</sub>OH).

### Crystallographic analysis of the enone S3.

Single crystals of the enone **S3** suitable for X-ray analysis were obtained by the slow evaporation of a solution of compound **S3** in *n*-hexanes at 22 °C. Low-temperature diffraction data ( $\omega$ -scans) were collected on a Rigaku MicroMax-007HF diffractometer coupled to a Saturn994+ CCD detector with Cu K $\alpha$  ( $\lambda = 1.54178 \text{ \AA}$ ) for the structure of 007b-17125. The diffraction images were processed and scaled using Rigaku Oxford Diffraction software (CrysAlisPro; Rigaku OD: The Woodlands, TX, 2015). The structure was solved with SHELXT and was refined against  $F^2$  on all data by full-matrix least squares with SHELXL (Sheldrick, G. M. *Acta Cryst.* 2008, A64, 112–122). All non-hydrogen atoms were refined anisotropically. Hydrogen atoms were included in the model at geometrically calculated positions and refined using a riding model. The isotropic displacement parameters of all hydrogen atoms were fixed to 1.2 times the U value of the atoms to which they are linked (1.5 times for methyl groups). The only exception is H3, which was found in the difference map and freely refined. The full numbering scheme of compound 007b-17125 can be found in the full details of the X-ray structure determination (CIF), which is included as Supporting Information. CCDC number 2114513 (007b-17125) contains the supplementary crystallographic data for this paper. These data can be obtained free of charge from The Cambridge Crystallographic Data Center via [www.ccdc.cam.ac.uk/data\\_request/cif](http://www.ccdc.cam.ac.uk/data_request/cif).

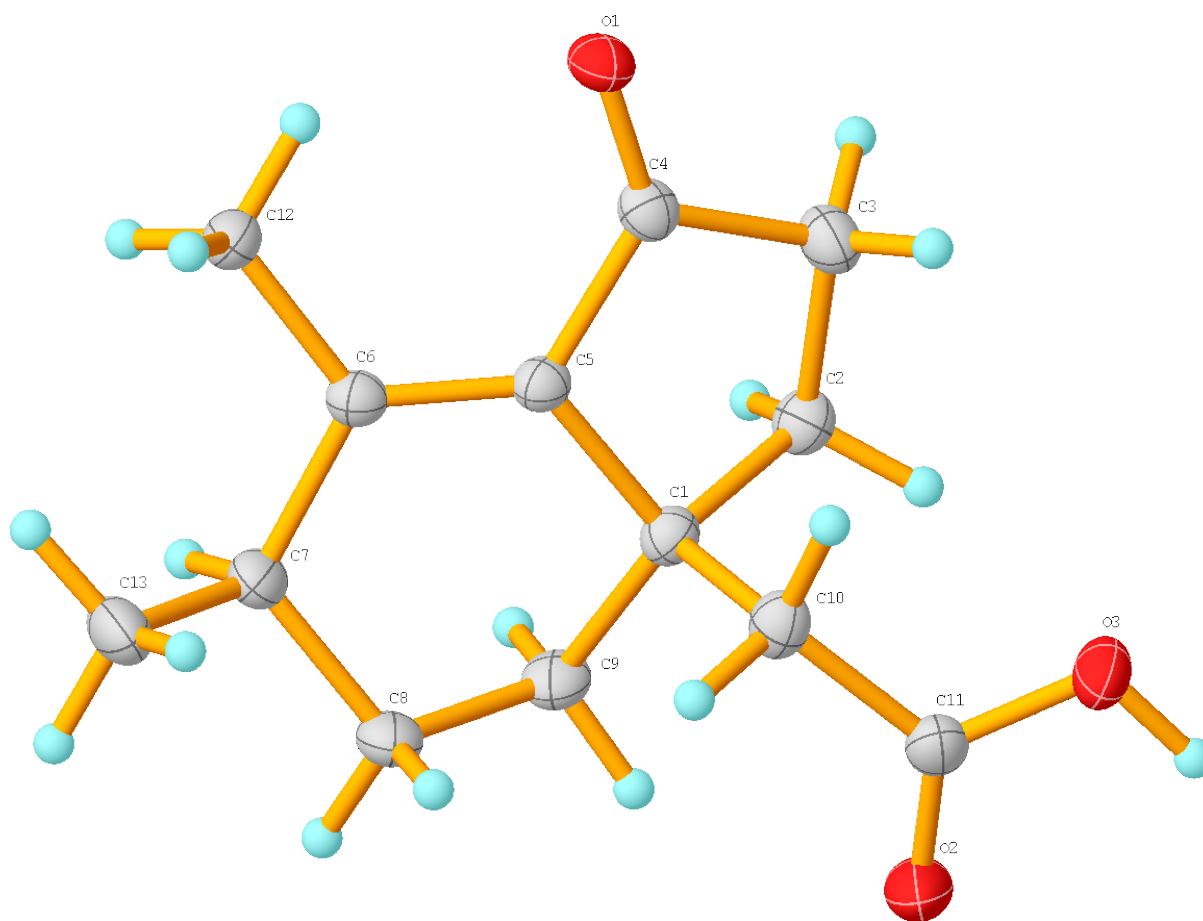

**Figure S8.** The complete numbering scheme of the enone **S3** with 50% thermal ellipsoid probability levels. The hydrogen atoms are shown as circles for clarity.

Crystal data and structure refinement for the enone **S3**:

|                                   |                                                                                                      |
|-----------------------------------|------------------------------------------------------------------------------------------------------|
| Identification code               | 007b-17125                                                                                           |
| Empirical formula                 | C13 H18 O3                                                                                           |
| Formula weight                    | 222.27                                                                                               |
| Temperature                       | 93(2) K                                                                                              |
| Wavelength                        | 1.54184 Å                                                                                            |
| Crystal system                    | Orthorhombic                                                                                         |
| Space group                       | P2 <sub>1</sub> 2 <sub>1</sub> 2 <sub>1</sub>                                                        |
| Unit cell dimensions              | a = 8.75320(10) Å      α = 90°.<br>b = 9.34860(10) Å      β = 90°.<br>c = 14.2570(2) Å      γ = 90°. |
| Volume                            | 1166.65(2) Å <sup>3</sup>                                                                            |
| Z                                 | 4                                                                                                    |
| Density (calculated)              | 1.265 Mg/m <sup>3</sup>                                                                              |
| Absorption coefficient            | 0.717 mm <sup>-1</sup>                                                                               |
| F(000)                            | 480                                                                                                  |
| Crystal size                      | 0.200 x 0.100 x 0.030 mm <sup>3</sup>                                                                |
| Crystal color and habit           | Colorless Block                                                                                      |
| Diffractometer                    | Rigaku Saturn 944+ CCD                                                                               |
| Theta range for data collection   | 5.659 to 66.585°.                                                                                    |
| Index ranges                      | -10 ≤ h ≤ 10, -11 ≤ k ≤ 11, -16 ≤ l ≤ 16                                                             |
| Reflections collected             | 41576                                                                                                |
| Independent reflections           | 2052 [R(int) = 0.0331]                                                                               |
| Observed reflections (I > 2σ(I))  | 2027                                                                                                 |
| Completeness to theta = 66.585°   | 100.0 %                                                                                              |
| Absorption correction             | Semi-empirical from equivalents                                                                      |
| Max. and min. transmission        | 1.00000 and 0.70996                                                                                  |
| Solution method                   | SHELXT-2014/5 (Sheldrick, 2014)                                                                      |
| Refinement method                 | SHELXL-2014/7 (Sheldrick, 2014)                                                                      |
| Data / restraints / parameters    | 2052 / 0 / 152                                                                                       |
| Goodness-of-fit on F <sup>2</sup> | 1.100                                                                                                |
| Final R indices [I > 2σ(I)]       | R1 = 0.0289, wR2 = 0.0724                                                                            |
| R indices (all data)              | R1 = 0.0292, wR2 = 0.0727                                                                            |
| Absolute structure parameter      | 0.03(4)                                                                                              |
| Extinction coefficient            | 0.0105(10)                                                                                           |
| Largest diff. peak and hole       | 0.261 and -0.170 e.Å <sup>-3</sup>                                                                   |

## Crystallographic analysis of the cyanoester **19**.

Single crystals of the ester **19** suitable for X-ray analysis were obtained by the slow evaporation of a solution of compound **19** in *n*-hexanes at 22 °C. Low-temperature diffraction data ( $\omega$ -scans) were collected on a Rigaku MicroMax-007HF diffractometer coupled to a Saturn994+ CCD detector with Cu K $\alpha$  ( $\lambda = 1.54178$  Å) for the structure of 007b-18129. The diffraction images were processed and scaled using Rigaku Oxford Diffraction software (CrysAlisPro; Rigaku OD: The Woodlands, TX, 2015). The structure was solved with SHELXT and was refined against  $F^2$  on all data by full-matrix least squares with SHELXL (Sheldrick, G. M. Acta Cryst. 2008, A64, 112–122). All non-hydrogen atoms were refined anisotropically. Hydrogen atoms were included in the model at geometrically calculated positions and refined using a riding model. The isotropic displacement parameters of all hydrogen atoms were fixed to 1.2 times the *U* value of the atoms to which they are linked (1.5 times for methyl groups). The full numbering scheme of compound 007b-18129 can be found in the full details of the X-ray structure determination (CIF), which is included as Supporting Information. CCDC number 2114514 (007b-18129) contains the supplementary crystallographic data for this paper. These data can be obtained free of charge from The Cambridge Crystallographic Data Center via [www.ccdc.cam.ac.uk/data\\_request/cif](http://www.ccdc.cam.ac.uk/data_request/cif).

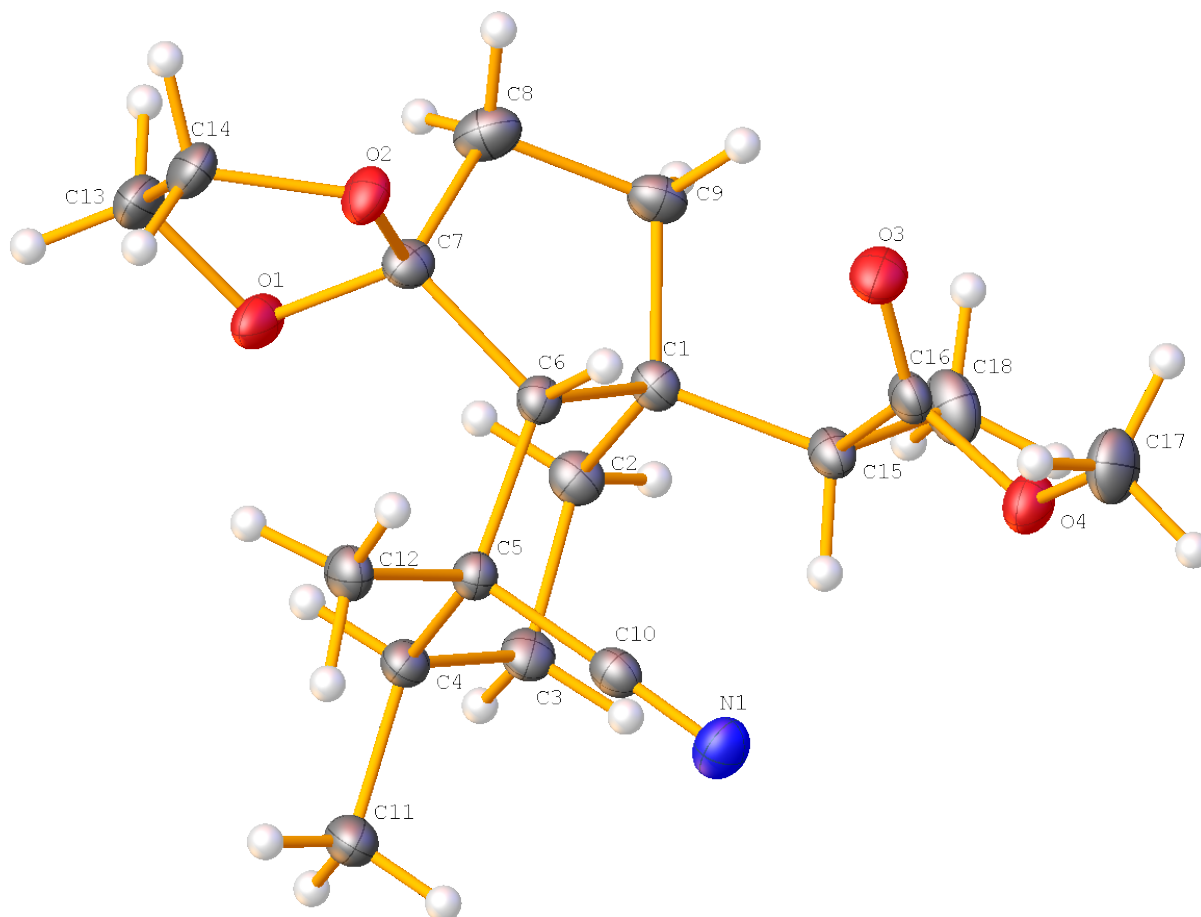

**Figure S9.** The complete numbering scheme of the cyanoester **19** with 50% thermal ellipsoid probability levels. The hydrogen atoms are shown as circles for clarity.

Crystal data and structure refinement for the cyanoester **19**.

|                                   |                                                                                                                  |
|-----------------------------------|------------------------------------------------------------------------------------------------------------------|
| Identification code               | 007b-18129                                                                                                       |
| Empirical formula                 | C <sub>18</sub> H <sub>27</sub> N O <sub>4</sub>                                                                 |
| Formula weight                    | 321.40                                                                                                           |
| Temperature                       | 93(2) K                                                                                                          |
| Wavelength                        | 1.54184 Å                                                                                                        |
| Crystal system                    | Monoclinic                                                                                                       |
| Space group                       | P2 <sub>1</sub>                                                                                                  |
| Unit cell dimensions              | a = 9.04910(10) Å      α = 90°.<br>b = 8.26590(10) Å      β = 103.3330(10)°.<br>c = 11.43230(10) Å      γ = 90°. |
| Volume                            | 832.075(16) Å <sup>3</sup>                                                                                       |
| Z                                 | 2                                                                                                                |
| Density (calculated)              | 1.283 Mg/m <sup>3</sup>                                                                                          |
| Absorption coefficient            | 0.727 mm <sup>-1</sup>                                                                                           |
| F(000)                            | 348                                                                                                              |
| Crystal size                      | 0.200 x 0.100 x 0.060 mm <sup>3</sup>                                                                            |
| Crystal color and habit           | Yellow Plate                                                                                                     |
| Diffractometer                    | Rigaku Saturn 944+ CCD                                                                                           |
| Theta range for data collection   | 3.974 to 66.576°.                                                                                                |
| Index ranges                      | -10 ≤ h ≤ 10, -9 ≤ k ≤ 9, -13 ≤ l ≤ 13                                                                           |
| Reflections collected             | 29673                                                                                                            |
| Independent reflections           | 2867 [R(int) = 0.0219]                                                                                           |
| Observed reflections (I > 2σ(I))  | 2850                                                                                                             |
| Completeness to theta = 66.576°   | 100.0 %                                                                                                          |
| Absorption correction             | Semi-empirical from equivalents                                                                                  |
| Max. and min. transmission        | 1.00000 and 0.82417                                                                                              |
| Solution method                   | SHELXT-2014/5 (Sheldrick, 2014)                                                                                  |
| Refinement method                 | SHELXL-2014/7 (Sheldrick, 2014)                                                                                  |
| Data / restraints / parameters    | 2867 / 1 / 213                                                                                                   |
| Goodness-of-fit on F <sup>2</sup> | 1.129                                                                                                            |
| Final R indices [I > 2σ(I)]       | R1 = 0.0273, wR2 = 0.0677                                                                                        |
| R indices (all data)              | R1 = 0.0275, wR2 = 0.0679                                                                                        |
| Absolute structure parameter      | -0.04(4)                                                                                                         |
| Extinction coefficient            | 0.0324(19)                                                                                                       |
| Largest diff. peak and hole       | 0.169 and -0.176 e.Å <sup>-3</sup>                                                                               |



## Crystallographic analysis of the diol **26**.

Single crystals of the diol **26** suitable for X-ray analysis were obtained by the slow evaporation of a solution of compound **26** in *n*-hexanes at 22 °C. Low-temperature diffraction data ( $\omega$ -scans) were collected on a Rigaku MicroMax-007HF diffractometer coupled to a Saturn994+ CCD detector with Cu K $\alpha$  ( $\lambda = 1.54178 \text{ \AA}$ ) for the structure of 007b-19061. The diffraction images were processed and scaled using Rigaku Oxford Diffraction software (CrysAlisPro; Rigaku OD: The Woodlands, TX, 2015). The structure was solved with SHELXT and was refined against  $F^2$  on all data by full-matrix least squares with SHELXL (Sheldrick, G. M. *Acta Cryst.* 2008, A64, 112–122). All non-hydrogen atoms were refined anisotropically. Hydrogen atoms were included in the model at geometrically calculated positions and refined using a riding model. The isotropic displacement parameters of all hydrogen atoms were fixed to 1.2 times the *U* value of the atoms to which they are linked (1.5 times for methyl and alcohol groups). The full numbering scheme of compound 007b-19061 can be found in the full details of the X-ray structure determination (CIF), which is included as Supporting Information. CCDC number 2114515 (007b-19061) contains the supplementary crystallographic data for this paper. These data can be obtained free of charge from The Cambridge Crystallographic Data Center via [www.ccdc.cam.ac.uk/data\\_request/cif](http://www.ccdc.cam.ac.uk/data_request/cif).

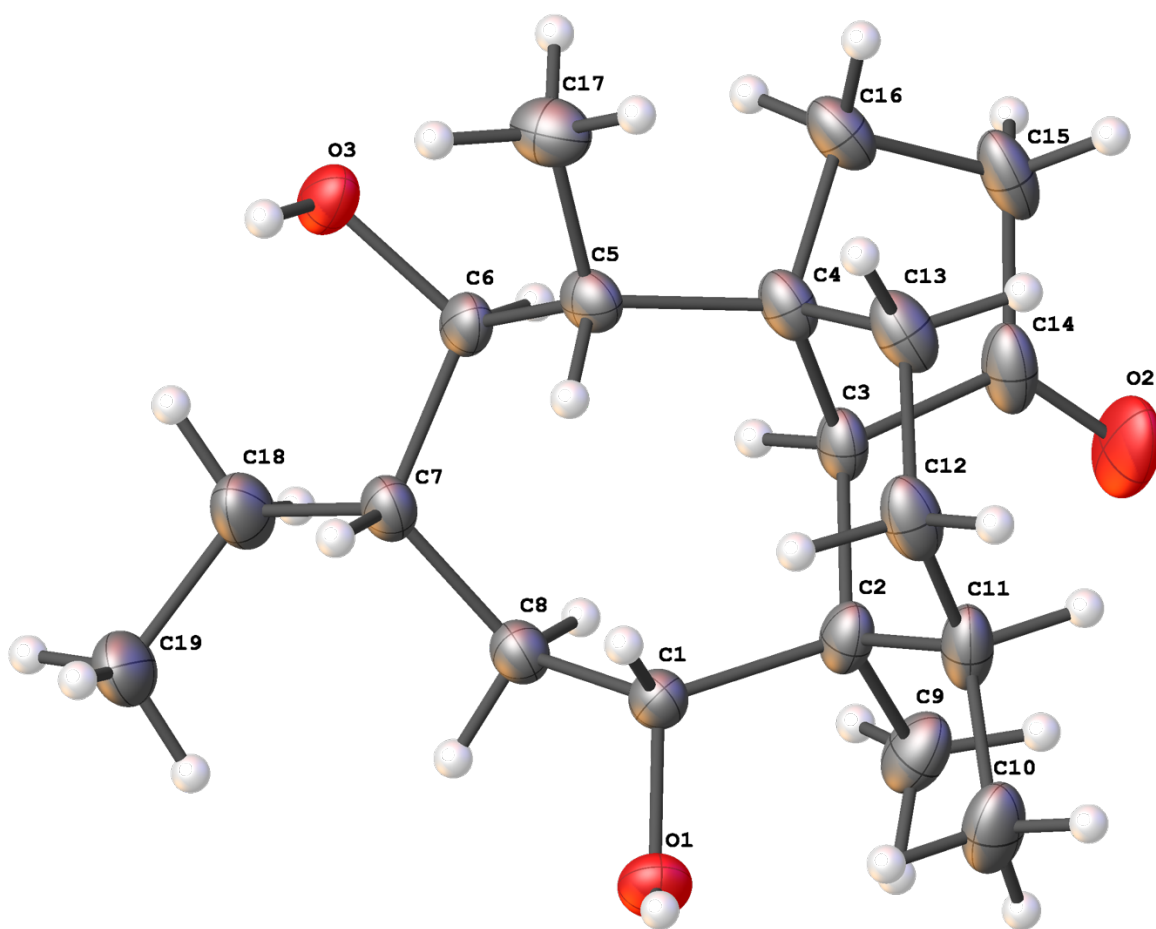

**Figure S10.** The complete numbering scheme of the diol **26** with 50% thermal ellipsoid probability levels. The hydrogen atoms are shown as circles for clarity.

Crystal data and structure refinement for the diol **26**.

|                                   |                                                   |                 |
|-----------------------------------|---------------------------------------------------|-----------------|
| Identification code               | 007b-19061                                        |                 |
| Empirical formula                 | C <sub>19</sub> H <sub>32</sub> O <sub>3</sub>    |                 |
| Formula weight                    | 308.44                                            |                 |
| Temperature                       | 93(2) K                                           |                 |
| Wavelength                        | 1.54184 Å                                         |                 |
| Crystal system                    | Monoclinic                                        |                 |
| Space group                       | P2 <sub>1</sub> /c                                |                 |
| Unit cell dimensions              | a = 8.4440(3) Å                                   | α = 90°.        |
|                                   | b = 22.9025(6) Å                                  | β = 97.093(2)°. |
|                                   | c = 8.6536(2) Å                                   | γ = 90°.        |
| Volume                            | 1660.70(8) Å <sup>3</sup>                         |                 |
| Z                                 | 4                                                 |                 |
| Density (calculated)              | 1.234 Mg/m <sup>3</sup>                           |                 |
| Absorption coefficient            | 0.636 mm <sup>-1</sup>                            |                 |
| F(000)                            | 680                                               |                 |
| Crystal size                      | 0.200 x 0.040 x 0.040 mm <sup>3</sup>             |                 |
| Crystal color and habit           | Colorless Needle                                  |                 |
| Diffractometer                    | Rigaku Saturn 944+ CCD                            |                 |
| Theta range for data collection   | 3.860 to 66.589°.                                 |                 |
| Index ranges                      | -10 ≤ h ≤ 10, -27 ≤ k ≤ 26, -10 ≤ l ≤ 10          |                 |
| Reflections collected             | 58395                                             |                 |
| Independent reflections           | 2932 [R(int) = 0.0605]                            |                 |
| Observed reflections (I > 2σ(I))  | 2568                                              |                 |
| Completeness to theta = 66.589°   | 99.9 %                                            |                 |
| Absorption correction             | Semi-empirical from equivalents                   |                 |
| Max. and min. transmission        | 1.00000 and 0.69350                               |                 |
| Solution method                   | SHELXT-2014/5 (Sheldrick, 2014)                   |                 |
| Refinement method                 | SHELXL-2014/7 (Sheldrick, 2014)                   |                 |
| Data / restraints / parameters    | 2932 / 0 / 205                                    |                 |
| Goodness-of-fit on F <sup>2</sup> | 1.062                                             |                 |
| Final R indices [I > 2σ(I)]       | R <sub>1</sub> = 0.0428, wR <sub>2</sub> = 0.1045 |                 |
| R indices (all data)              | R <sub>1</sub> = 0.0498, wR <sub>2</sub> = 0.1089 |                 |
| Extinction coefficient            | n/a                                               |                 |
| Largest diff. peak and hole       | 0.193 and -0.313 e.Å <sup>-3</sup>                |                 |

**Alert level A**

PLAT417\_ALERT\_2\_A Short Inter D-H..H-D H1 ..H1 . 1.39 Ang. -x,1-y,1-z = 3\_566 Check

Author Response: The H1 is likely disordered about the C1-O1 bond. There is a hydrogen bond between O1 and its symmetry equivalent position. The atom was placed geometrically and refined as a riding atom with the special position constraints suppressed

## Crystallographic analysis of the C7-methyl substituted cyanoester **S20**.

Single crystals of the ester **S20** suitable for X-ray analysis were obtained by the slow evaporation of a solution of compound **S20** in *n*-hexanes at 22 °C. Low-temperature diffraction data ( $\omega$ -scans) were collected on a Rigaku MicroMax-007HF diffractometer coupled to a Saturn994+ CCD detector with Cu K $\alpha$  ( $\lambda = 1.54178 \text{ \AA}$ ) for the structure of 007a-20033. The diffraction images were processed and scaled using Rigaku Oxford Diffraction software (CrysAlisPro; Rigaku OD: The Woodlands, TX, 2015). The structure was solved with SHELXT and was refined against  $F^2$  on all data by full-matrix least squares with SHELXL (Sheldrick, G. M. Acta Cryst. 2008, A64, 112–122). All non-hydrogen atoms were refined anisotropically. Hydrogen atoms were included in the model at geometrically calculated positions and refined using a riding model. The isotropic displacement parameters of all hydrogen atoms were fixed to 1.2 times the *U* value of the atoms to which they are linked (1.5 times for methyl groups). Atom C19 is disordered over two positions. The site occupancies were freely refined to values of 0.81/0.19. Due to the small amount of electron density in the minor site, the thermal parameter was restrained to be identical to its major counterpart. The full numbering scheme of compound 007a-20033 can be found in the full details of the X-ray structure determination (CIF), which is included as Supporting Information. CCDC number 2114516 (007a-20033) contains the supplementary crystallographic data for this paper. These data can be obtained free of charge from The Cambridge Crystallographic Data Center via [www.ccdc.cam.ac.uk/data\\_request/cif](http://www.ccdc.cam.ac.uk/data_request/cif).

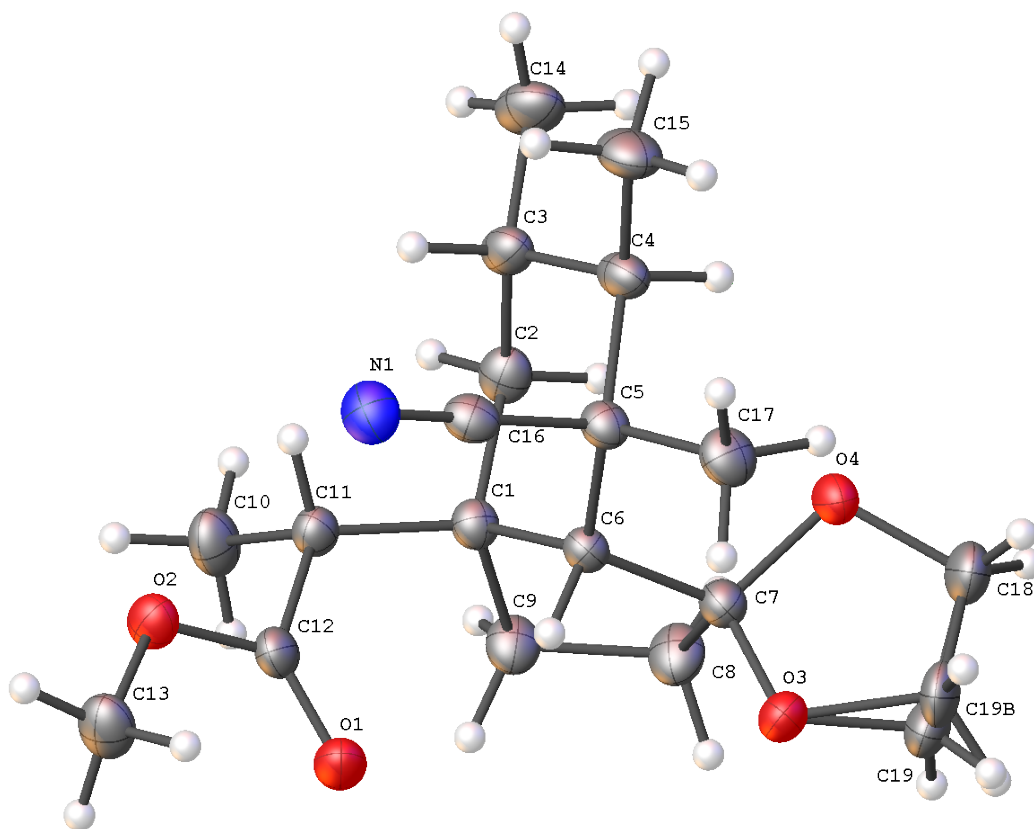

**Figure S11.** The complete numbering scheme of the cyanoester **S20** with 50% thermal ellipsoid probability levels. The hydrogen atoms are shown as circles for clarity.

Crystal data and structure refinement for the cyanoester **S20**.

|                                   |                                                  |          |
|-----------------------------------|--------------------------------------------------|----------|
| Identification code               | 007a-20033                                       |          |
| Empirical formula                 | C <sub>19</sub> H <sub>29</sub> N O <sub>4</sub> |          |
| Formula weight                    | 335.43                                           |          |
| Temperature                       | 93(2) K                                          |          |
| Wavelength                        | 1.54184 Å                                        |          |
| Crystal system                    | Orthorhombic                                     |          |
| Space group                       | P2 <sub>1</sub> 2 <sub>1</sub> 2 <sub>1</sub>    |          |
| Unit cell dimensions              | a = 8.28320(10) Å                                | α = 90°. |
|                                   | b = 10.92690(10) Å                               | β = 90°. |
|                                   | c = 19.5262(2) Å                                 | γ = 90°. |
| Volume                            | 1767.31(3) Å <sup>3</sup>                        |          |
| Z                                 | 4                                                |          |
| Density (calculated)              | 1.261 Mg/m <sup>3</sup>                          |          |
| Absorption coefficient            | 0.705 mm <sup>-1</sup>                           |          |
| F(000)                            | 728                                              |          |
| Crystal size                      | 0.100 x 0.080 x 0.040 mm <sup>3</sup>            |          |
| Crystal color and habit           | Colorless Block                                  |          |
| Diffractometer                    | Rigaku Saturn 944+ CCD                           |          |
| Theta range for data collection   | 4.529 to 66.576°.                                |          |
| Index ranges                      | -9 ≤ h ≤ 9, -13 ≤ k ≤ 13, -23 ≤ l ≤ 23           |          |
| Reflections collected             | 62899                                            |          |
| Independent reflections           | 3101 [R(int) = 0.0421]                           |          |
| Observed reflections (I > 2σ(I))  | 3071                                             |          |
| Completeness to theta = 66.576°   | 98.9 %                                           |          |
| Absorption correction             | Semi-empirical from equivalents                  |          |
| Max. and min. transmission        | 1.00000 and 0.85408                              |          |
| Solution method                   | SHELXT-2014/5 (Sheldrick, 2014)                  |          |
| Refinement method                 | SHELXL-2014/7 (Sheldrick, 2014)                  |          |
| Data / restraints / parameters    | 3101 / 0 / 232                                   |          |
| Goodness-of-fit on F <sup>2</sup> | 1.062                                            |          |
| Final R indices [I > 2σ(I)]       | R1 = 0.0245, wR2 = 0.0661                        |          |
| R indices (all data)              | R1 = 0.0247, wR2 = 0.0663                        |          |
| Absolute structure parameter      | 0.01(4)                                          |          |
| Largest diff. peak and hole       | 0.175 and -0.135 e.Å <sup>-3</sup>               |          |

### Crystallographic analysis of the ring-contracted cyanoester **S35**.

Single crystals of the ester **S35** suitable for X-ray analysis were obtained by the slow evaporation of a solution of compound **S35** in *n*-hexanes at 22 °C. Low-temperature diffraction data ( $\omega$ -scans) were collected on a Rigaku MicroMax-007HF diffractometer coupled to a Saturn994+ CCD detector with Cu K $\alpha$  ( $\lambda = 1.54178$  Å) for the structure of 007b-21112. The diffraction images were processed and scaled using Rigaku Oxford Diffraction software (CrysAlisPro; Rigaku OD: The Woodlands, TX, 2015). The structure was solved with SHELXT and was refined against  $F^2$  on all data by full-matrix least squares with SHELXL (Sheldrick, G. M. *Acta Cryst.* 2008, A64, 112–122). All non-hydrogen atoms were refined anisotropically. Hydrogen atoms were included in the model at geometrically calculated positions and refined using a riding model. The isotropic displacement parameters of all hydrogen atoms were fixed to 1.2 times the *U* value of the atoms to which they are linked (1.5 times for methyl groups). The full numbering scheme of compound 007b-21112 can be found in the full details of the X-ray structure determination (CIF), which is included as Supporting Information. CCDC number 2114517 (007b-21112) contains the supplementary crystallographic data for this paper. These data can be obtained free of charge from The Cambridge Crystallographic Data Center via [www.ccdc.cam.ac.uk/data\\_request/cif](http://www.ccdc.cam.ac.uk/data_request/cif).

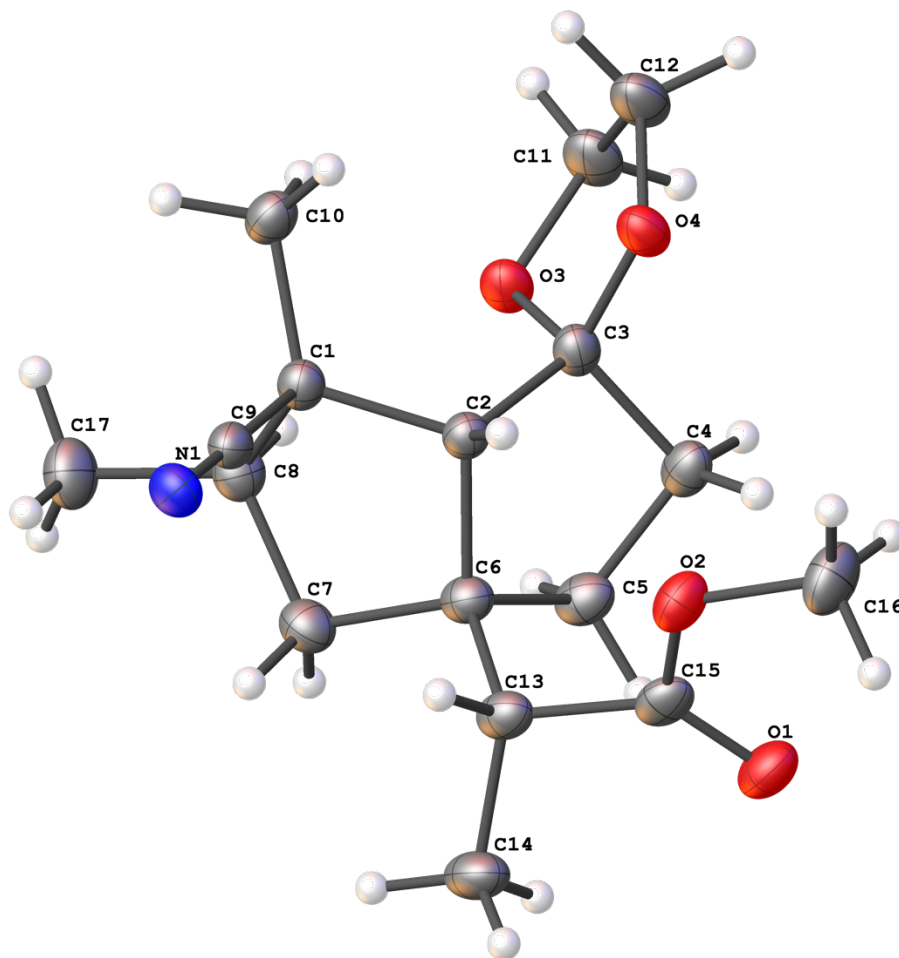

**Figure S12.** The complete numbering scheme of the cyanoester **S35** with 50% thermal ellipsoid probability levels. The hydrogen atoms are shown as circles for clarity.

Crystal data and structure refinement for the cyanoester **S35**.

|                                   |                                                  |                   |
|-----------------------------------|--------------------------------------------------|-------------------|
| Identification code               | 007b-21112                                       |                   |
| Empirical formula                 | C <sub>17</sub> H <sub>25</sub> N O <sub>4</sub> |                   |
| Formula weight                    | 307.38                                           |                   |
| Temperature                       | 93(2) K                                          |                   |
| Wavelength                        | 1.54184 Å                                        |                   |
| Crystal system                    | Monoclinic                                       |                   |
| Space group                       | P2 <sub>1</sub>                                  |                   |
| Unit cell dimensions              | a = 6.23790(10) Å                                | α = 90°.          |
|                                   | b = 8.89490(10) Å                                | β = 91.1470(10)°. |
|                                   | c = 14.8286(2) Å                                 | γ = 90°.          |
| Volume                            | 822.61(2) Å <sup>3</sup>                         |                   |
| Z                                 | 2                                                |                   |
| Density (calculated)              | 1.241 Mg/m <sup>3</sup>                          |                   |
| Absorption coefficient            | 0.713 mm <sup>-1</sup>                           |                   |
| F(000)                            | 332                                              |                   |
| Crystal size                      | 0.200 x 0.200 x 0.020 mm <sup>3</sup>            |                   |
| Crystal color and habit           | Colorless Block                                  |                   |
| Diffractometer                    | Rigaku Saturn 944+ CCD                           |                   |
| Theta range for data collection   | 2.981 to 66.584°.                                |                   |
| Index ranges                      | -7<=h<=7, -10<=k<=10, -17<=l<=17                 |                   |
| Reflections collected             | 28682                                            |                   |
| Independent reflections           | 2883 [R(int) = 0.0392]                           |                   |
| Observed reflections (I > 2σ(I))  | 2834                                             |                   |
| Completeness to theta = 66.584°   | 99.7 %                                           |                   |
| Absorption correction             | Semi-empirical from equivalents                  |                   |
| Max. and min. transmission        | 1.00000 and 0.59439                              |                   |
| Solution method                   | SHELXT-2014/5 (Sheldrick, 2014)                  |                   |
| Refinement method                 | SHELXL-2014/7 (Sheldrick, 2014)                  |                   |
| Data / restraints / parameters    | 2883 / 1 / 204                                   |                   |
| Goodness-of-fit on F <sup>2</sup> | 1.059                                            |                   |
| Final R indices [I>2σ(I)]         | R1 = 0.0268, wR2 = 0.0666                        |                   |
| R indices (all data)              | R1 = 0.0274, wR2 = 0.0672                        |                   |
| Absolute structure parameter      | -0.06(6)                                         |                   |
| Extinction coefficient            | 0.0205(13)                                       |                   |
| Largest diff. peak and hole       | 0.145 and -0.146 e.Å <sup>-3</sup>               |                   |

Catalog of nuclear magnetic resonance spectra.

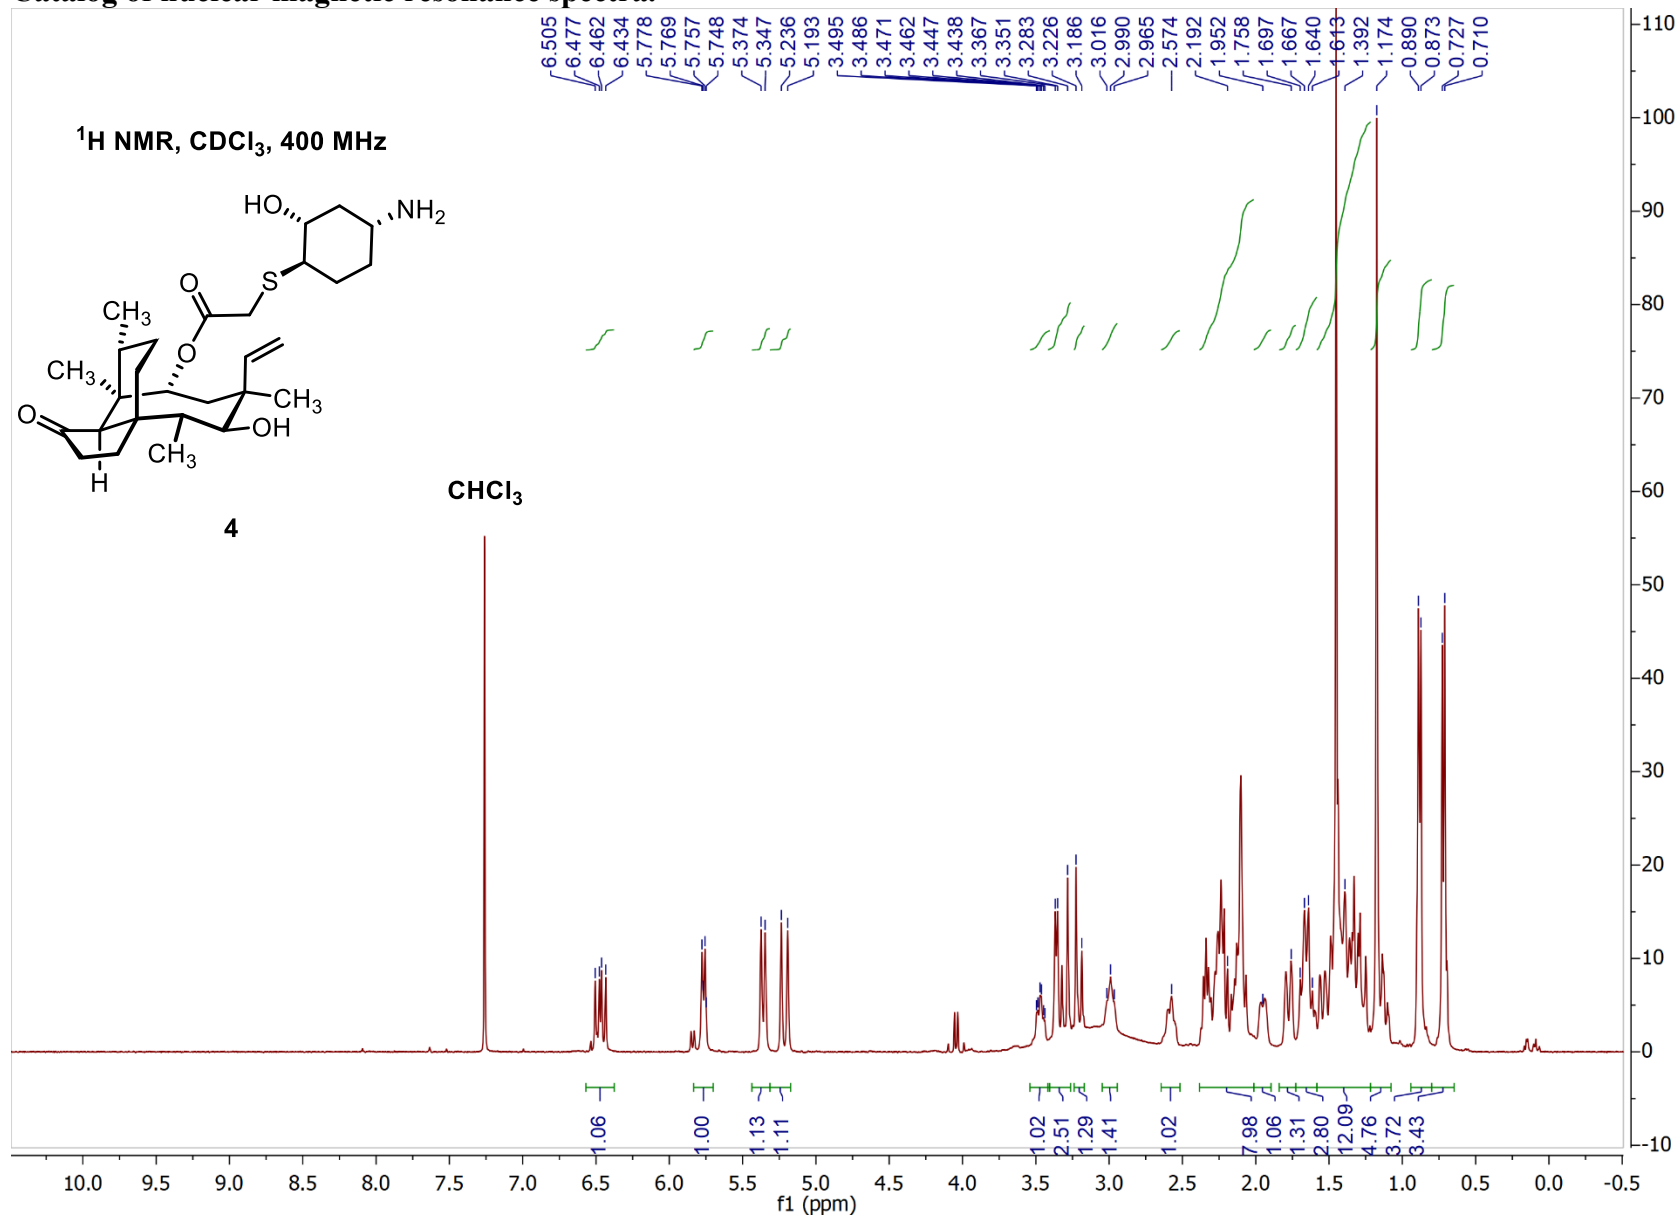

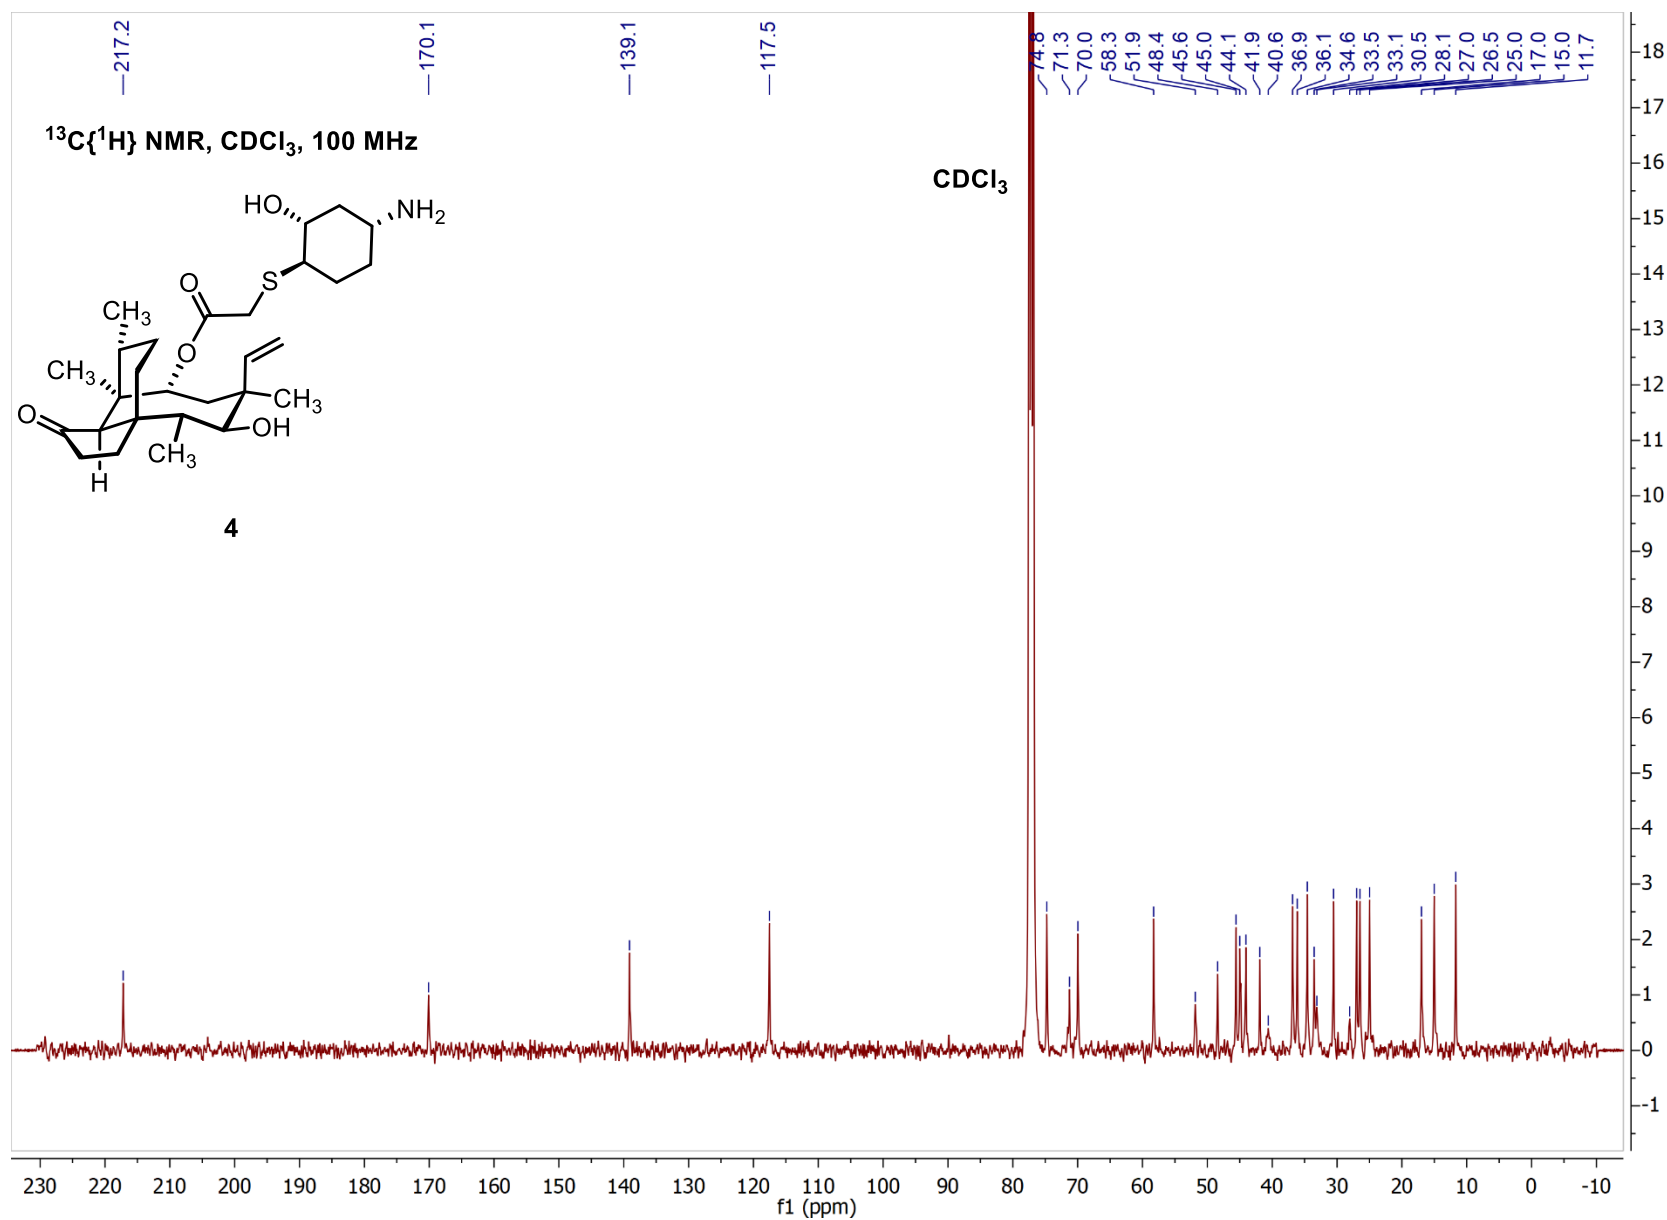



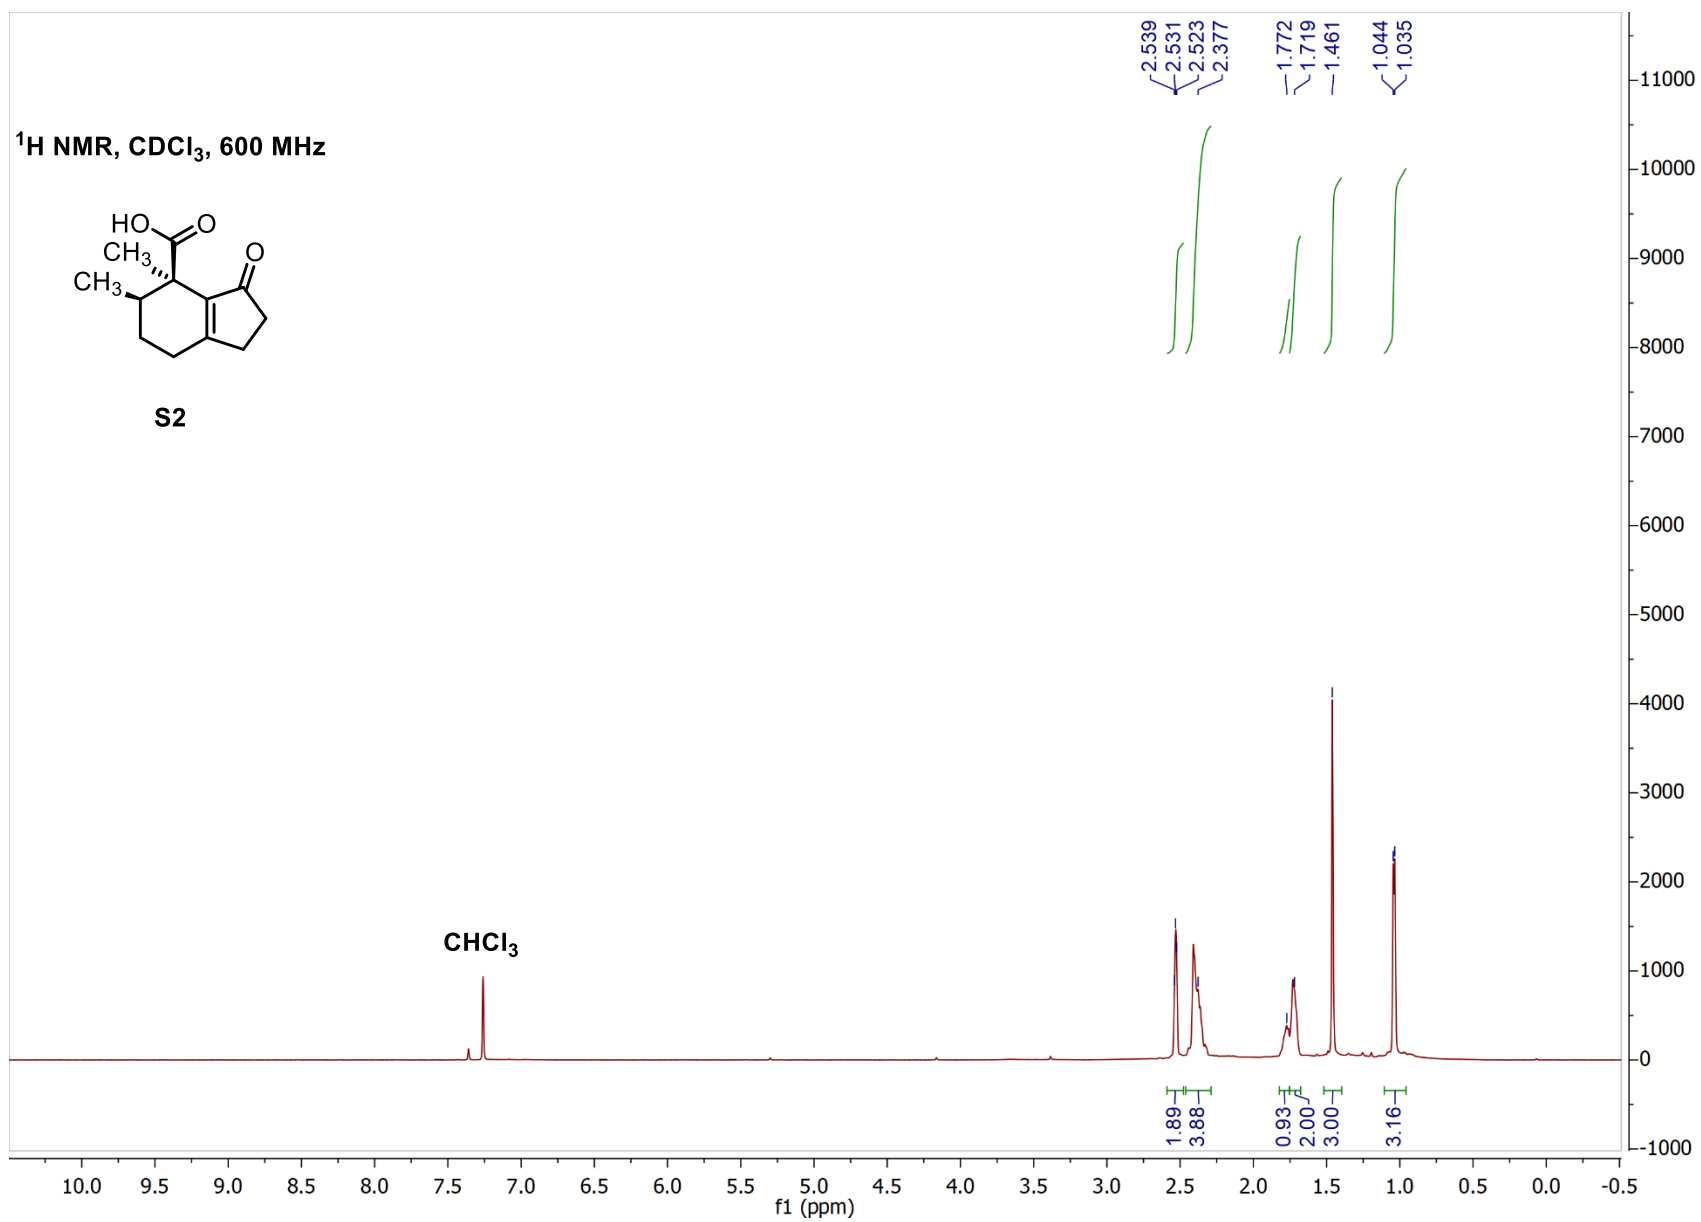

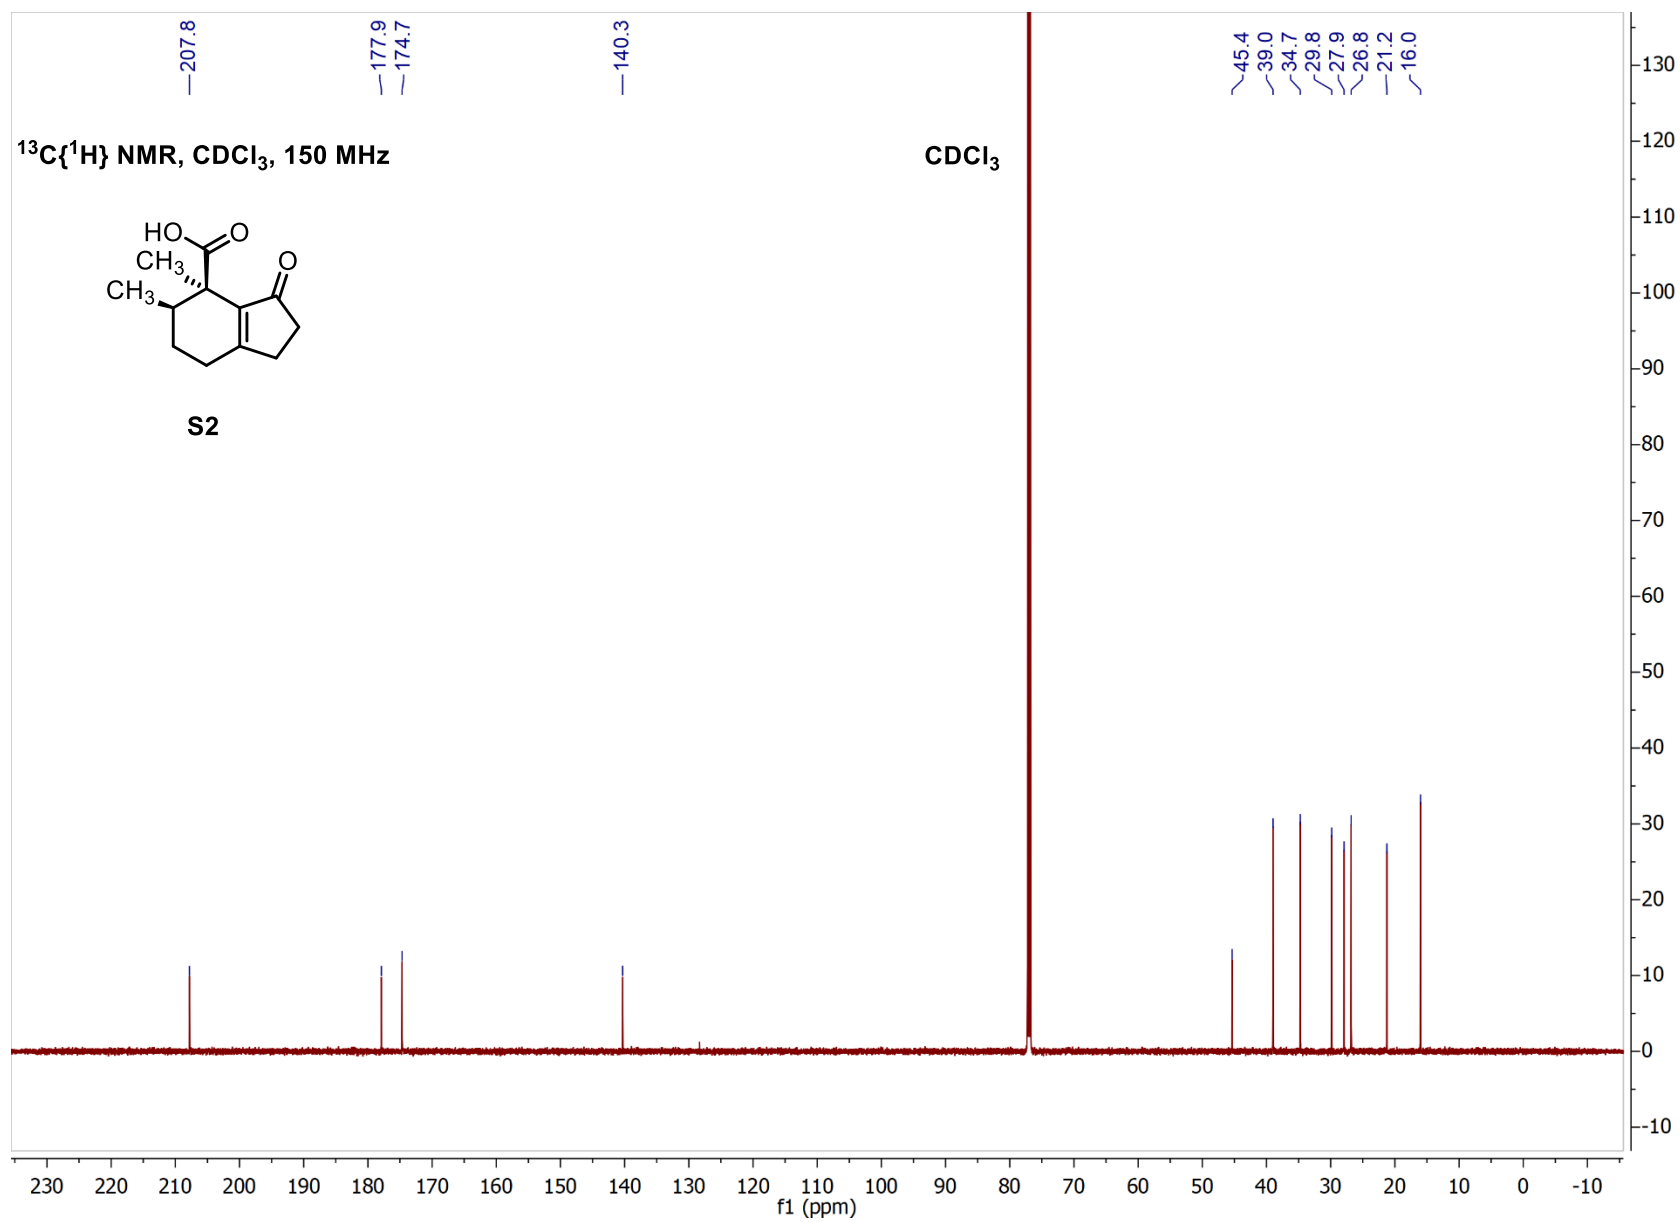

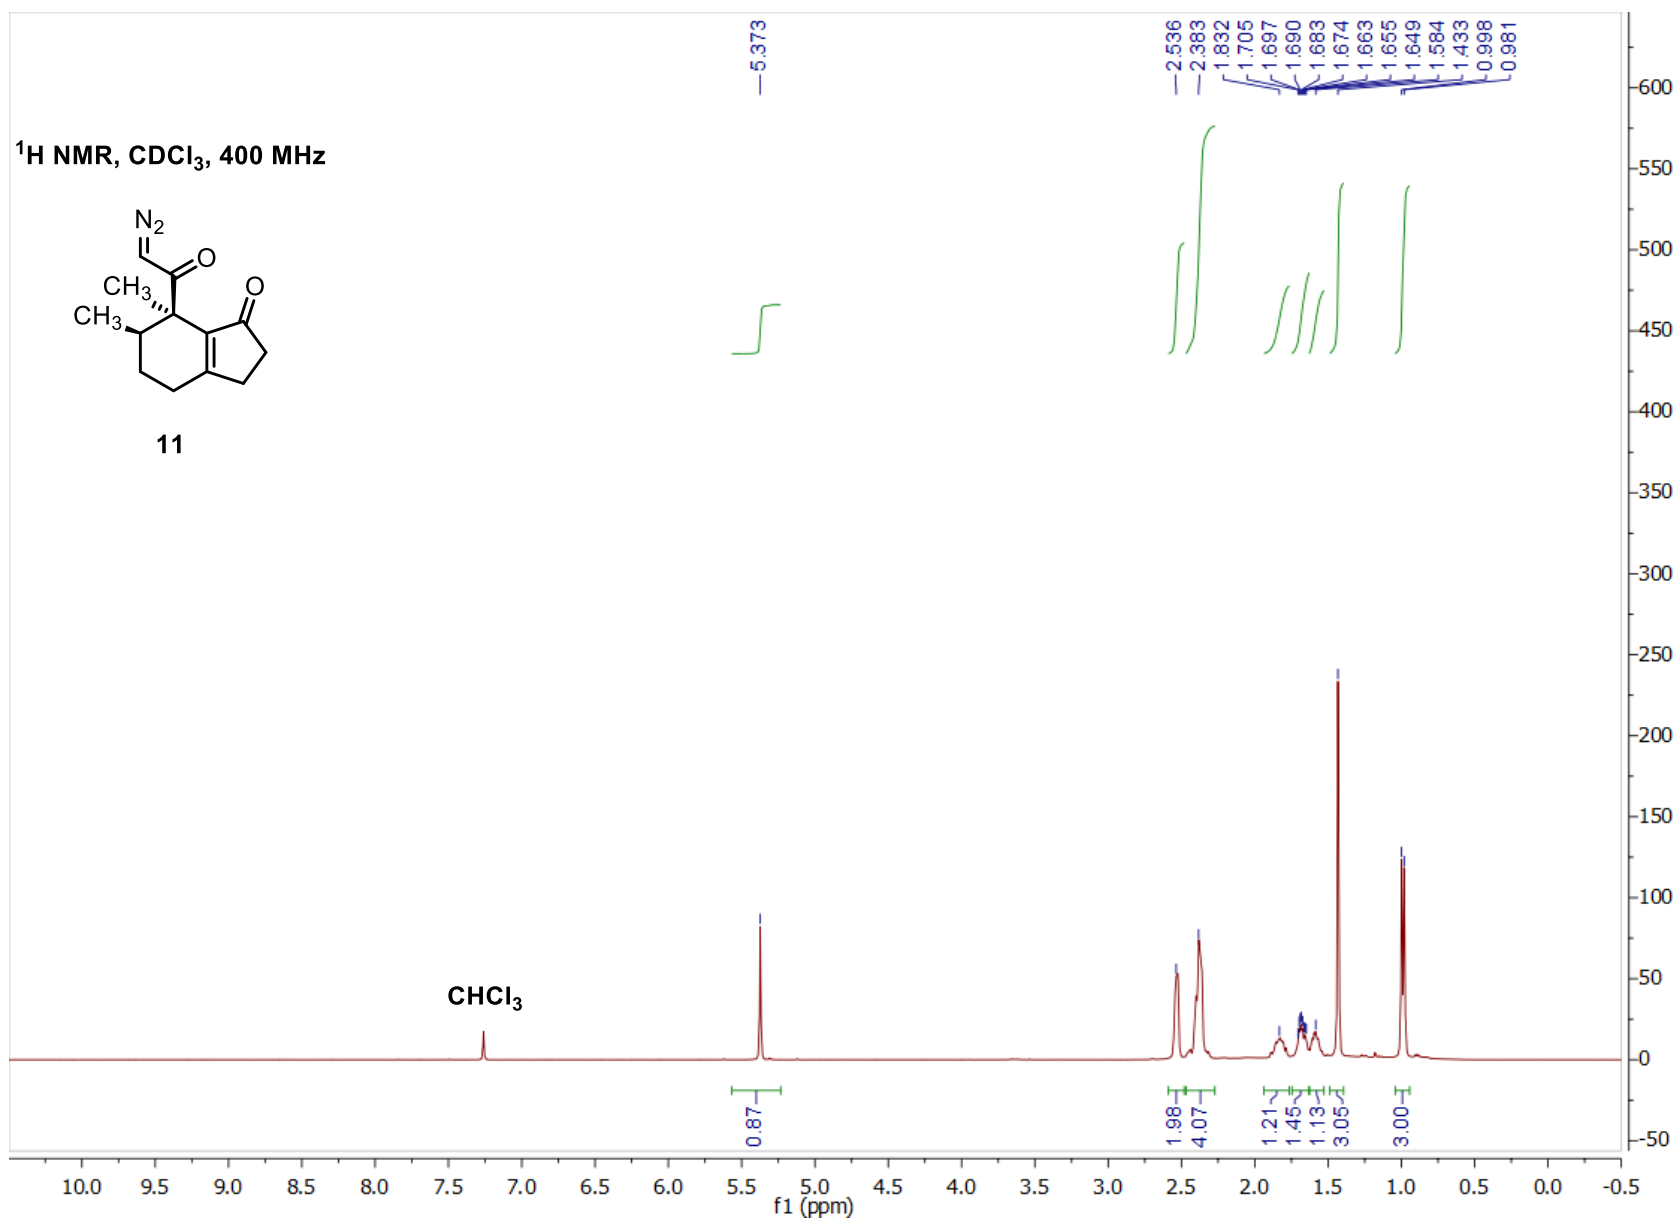

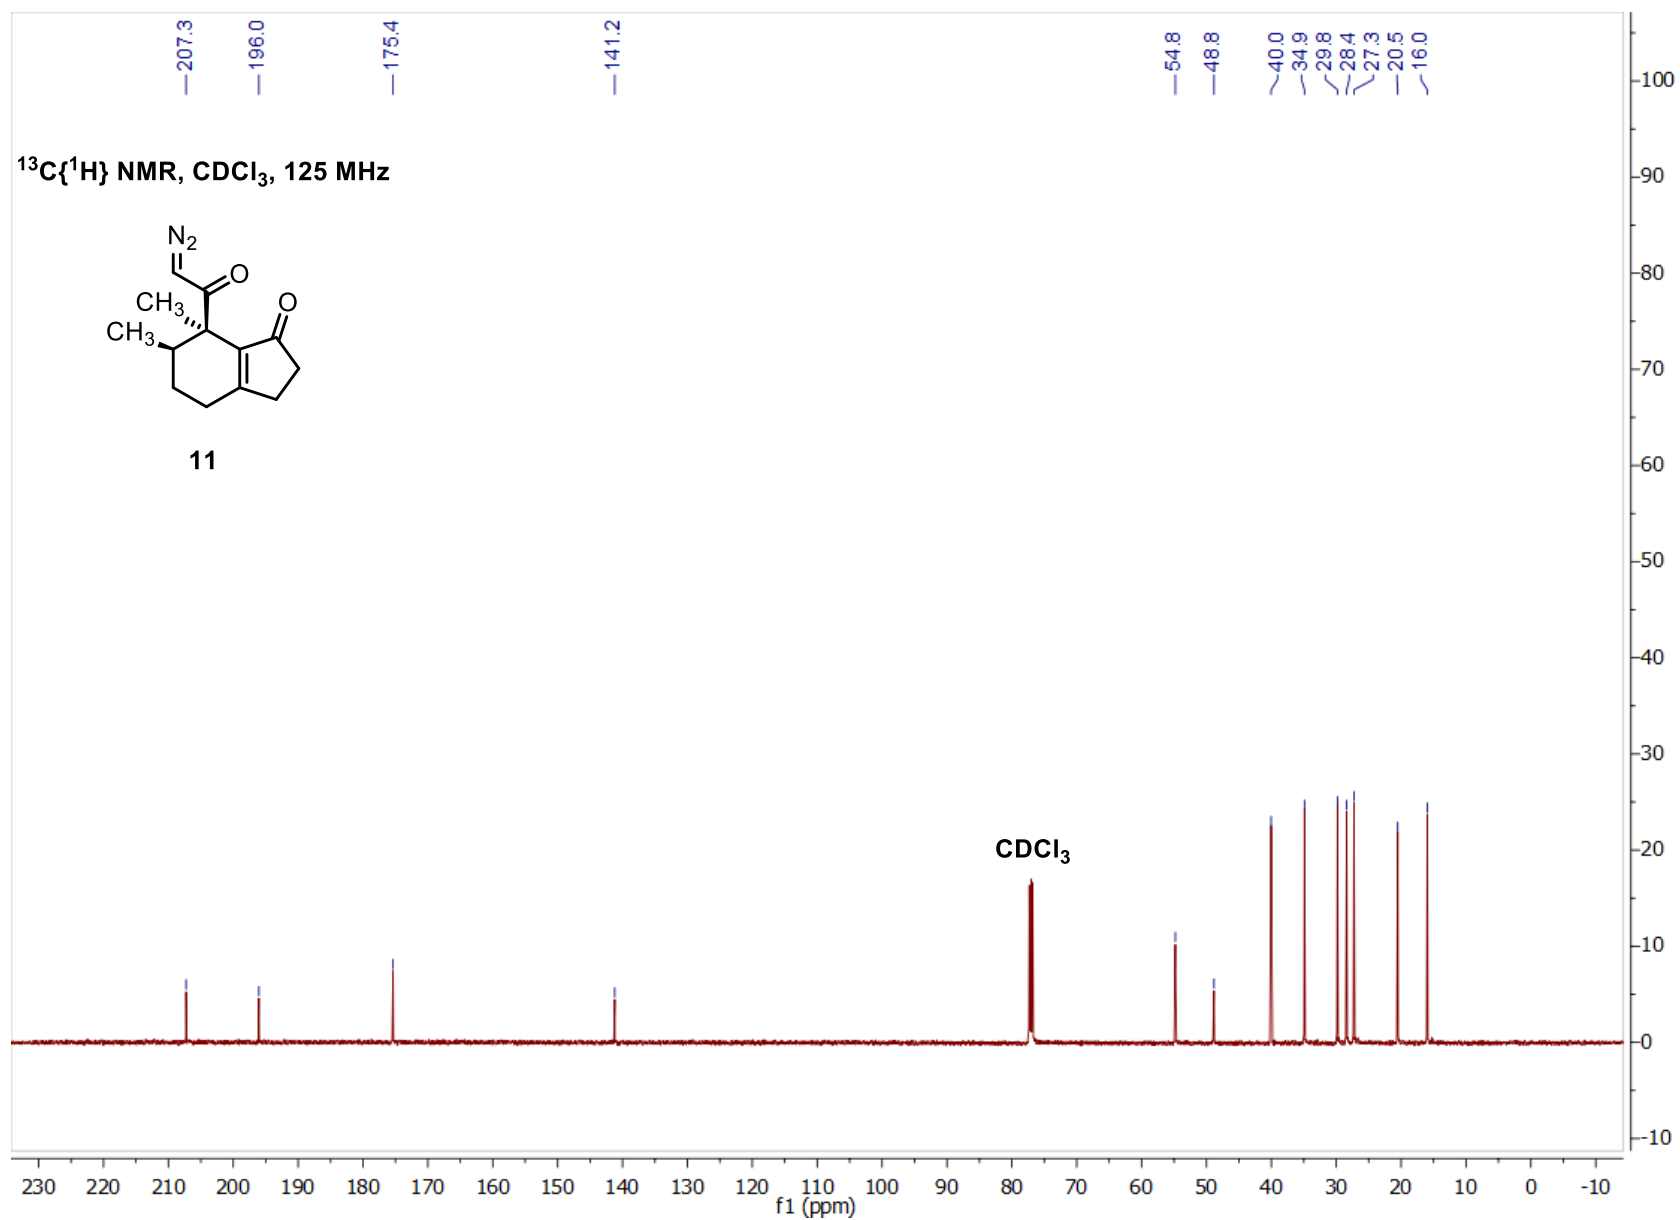

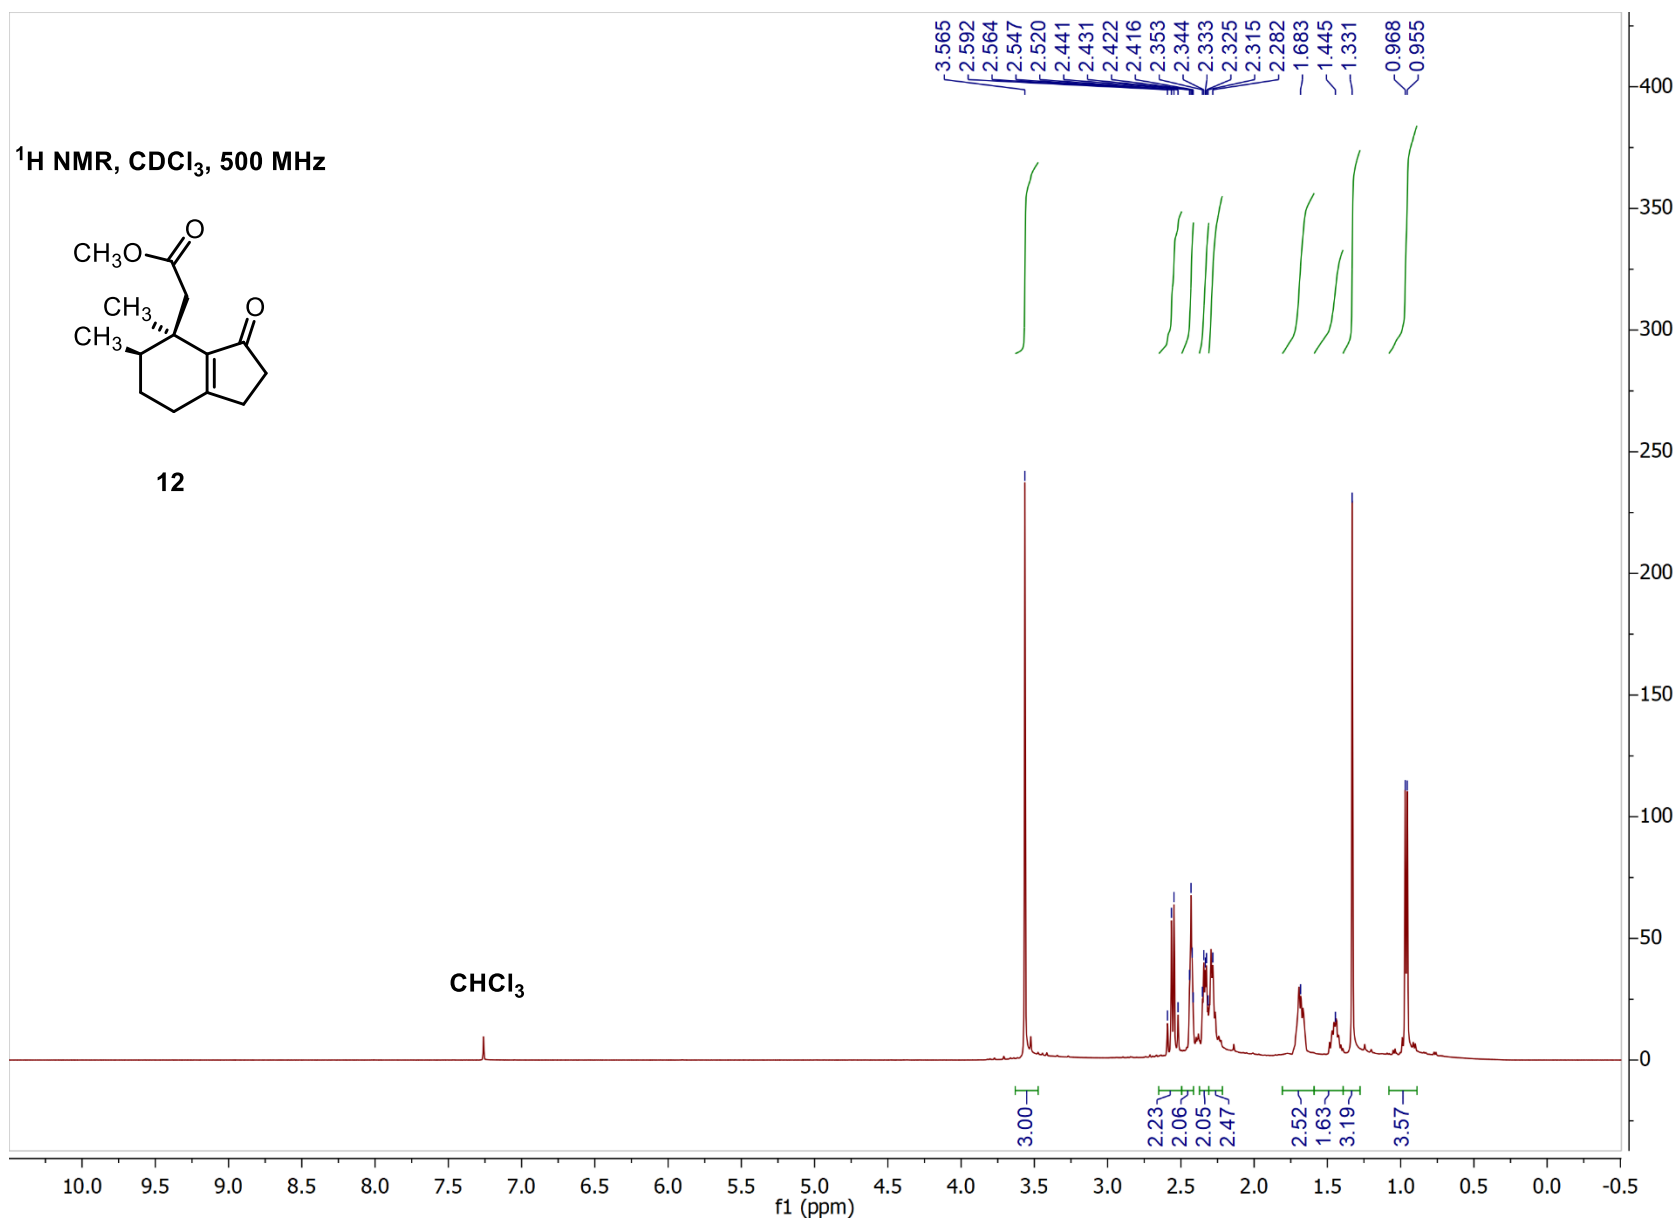

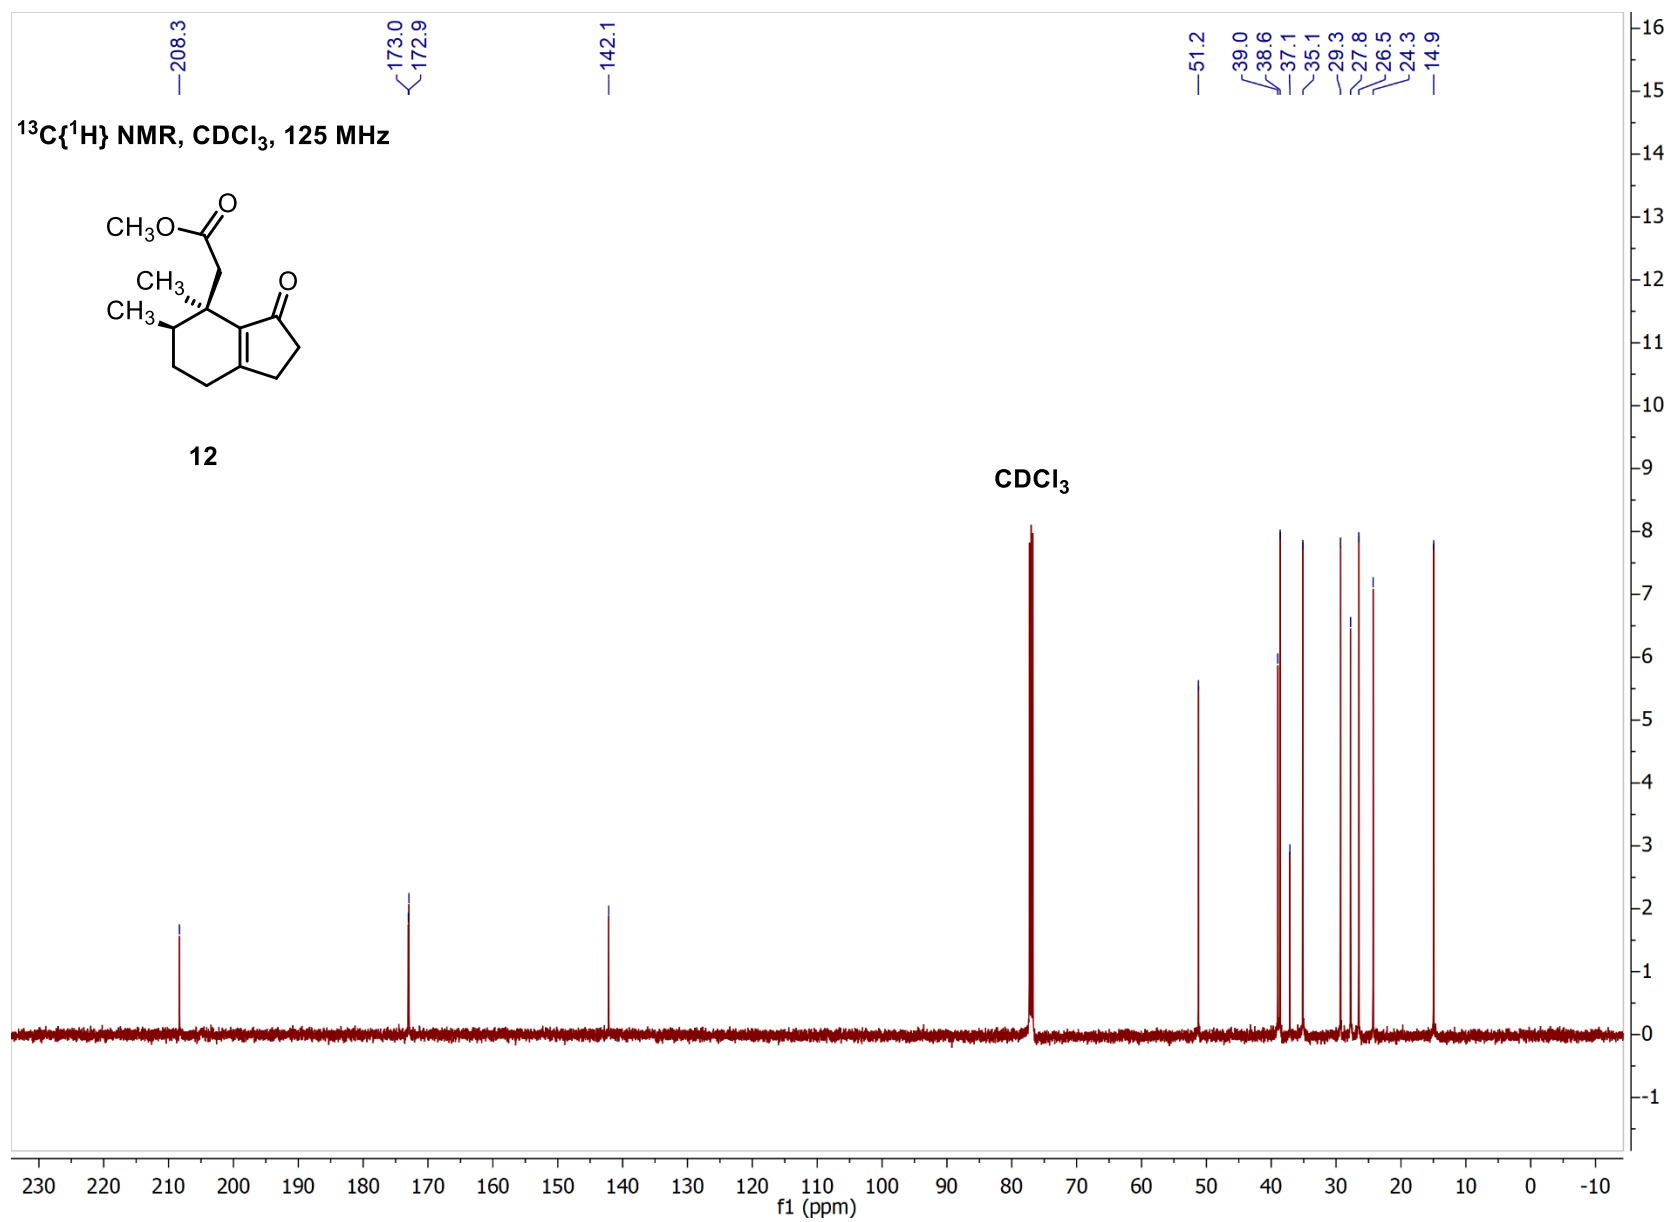

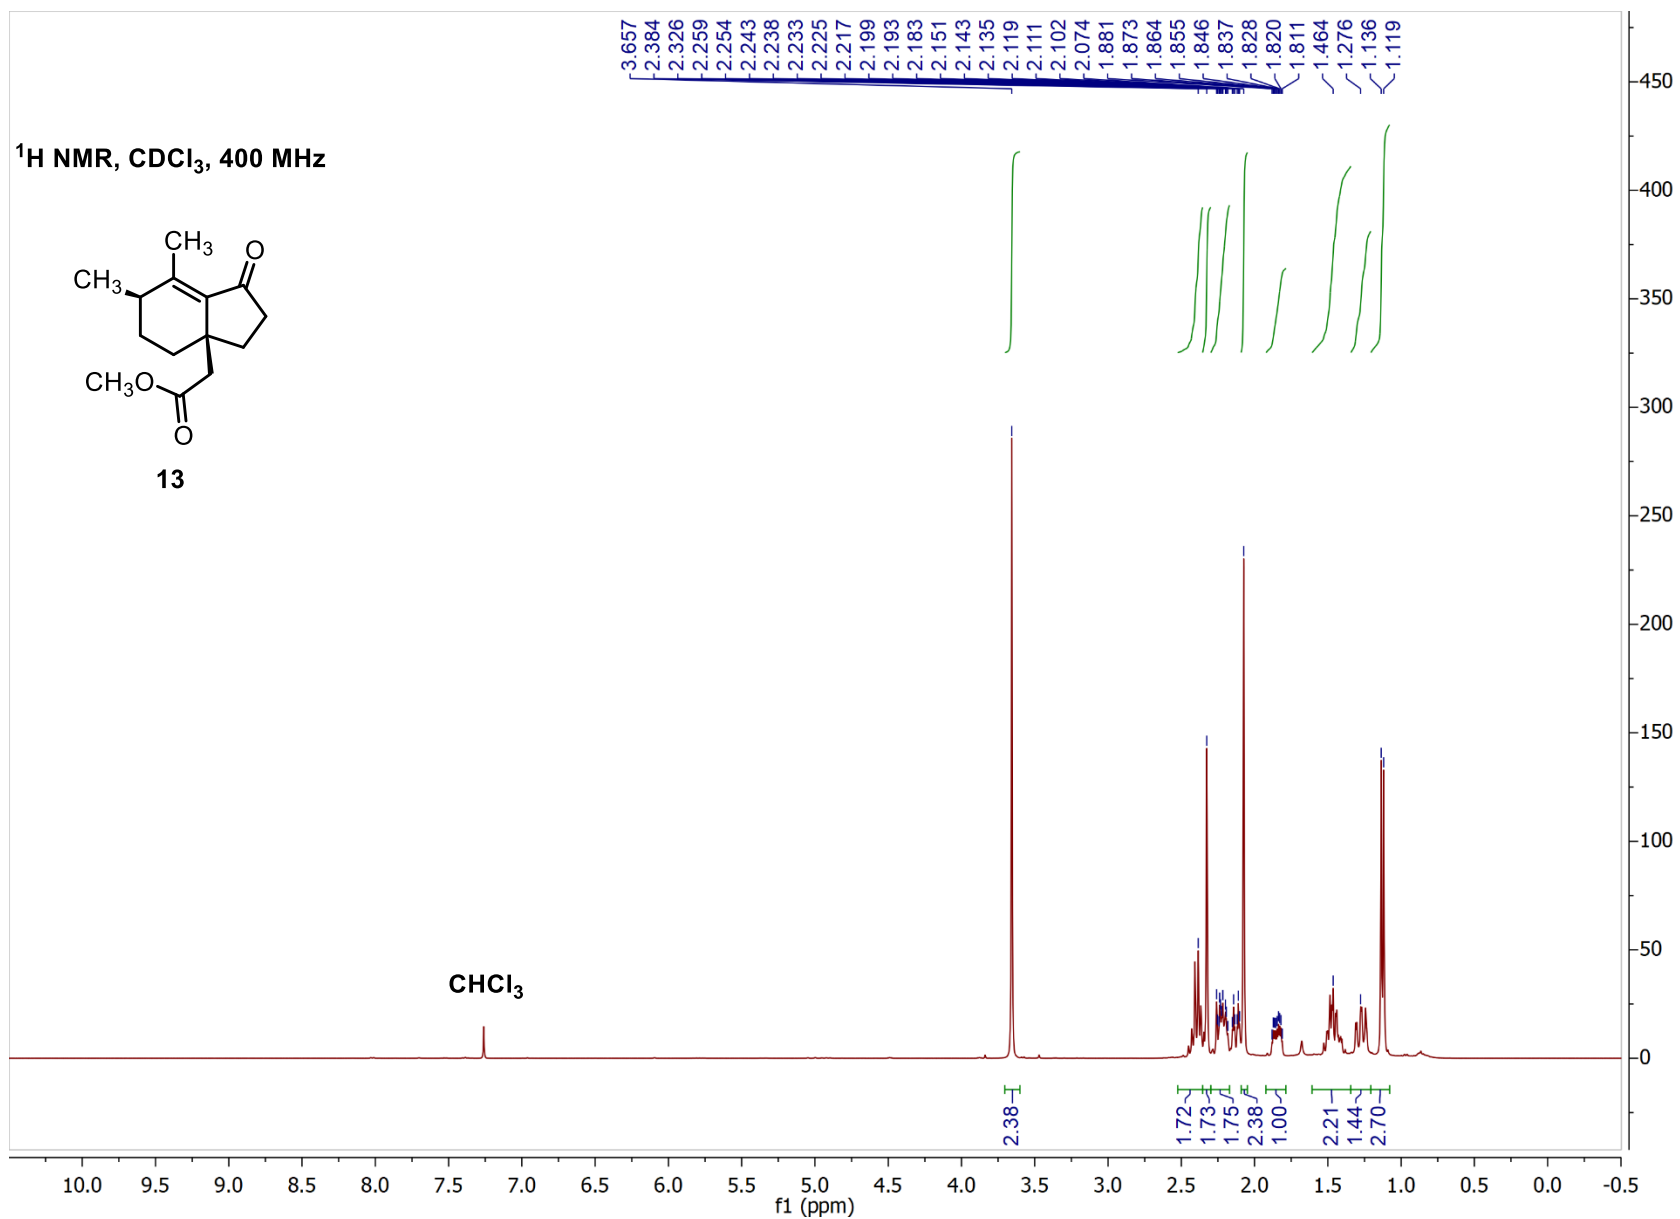

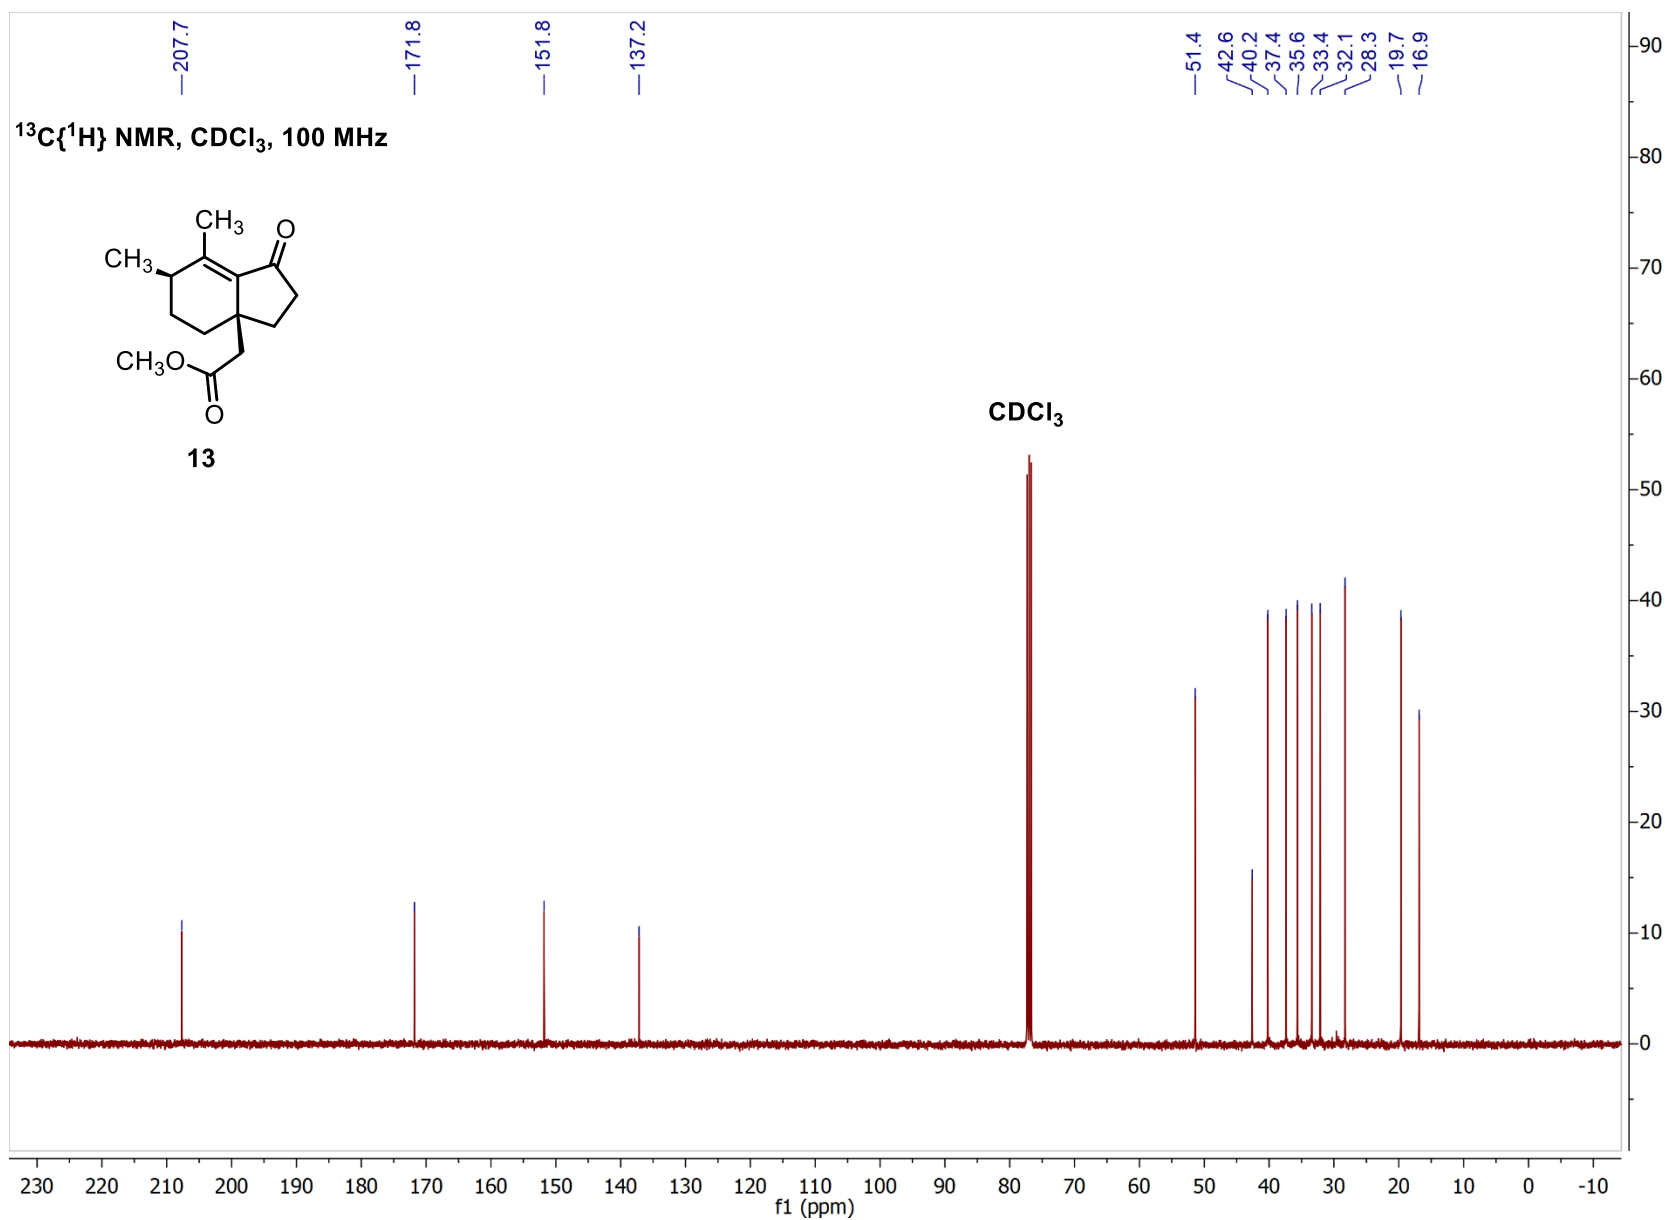



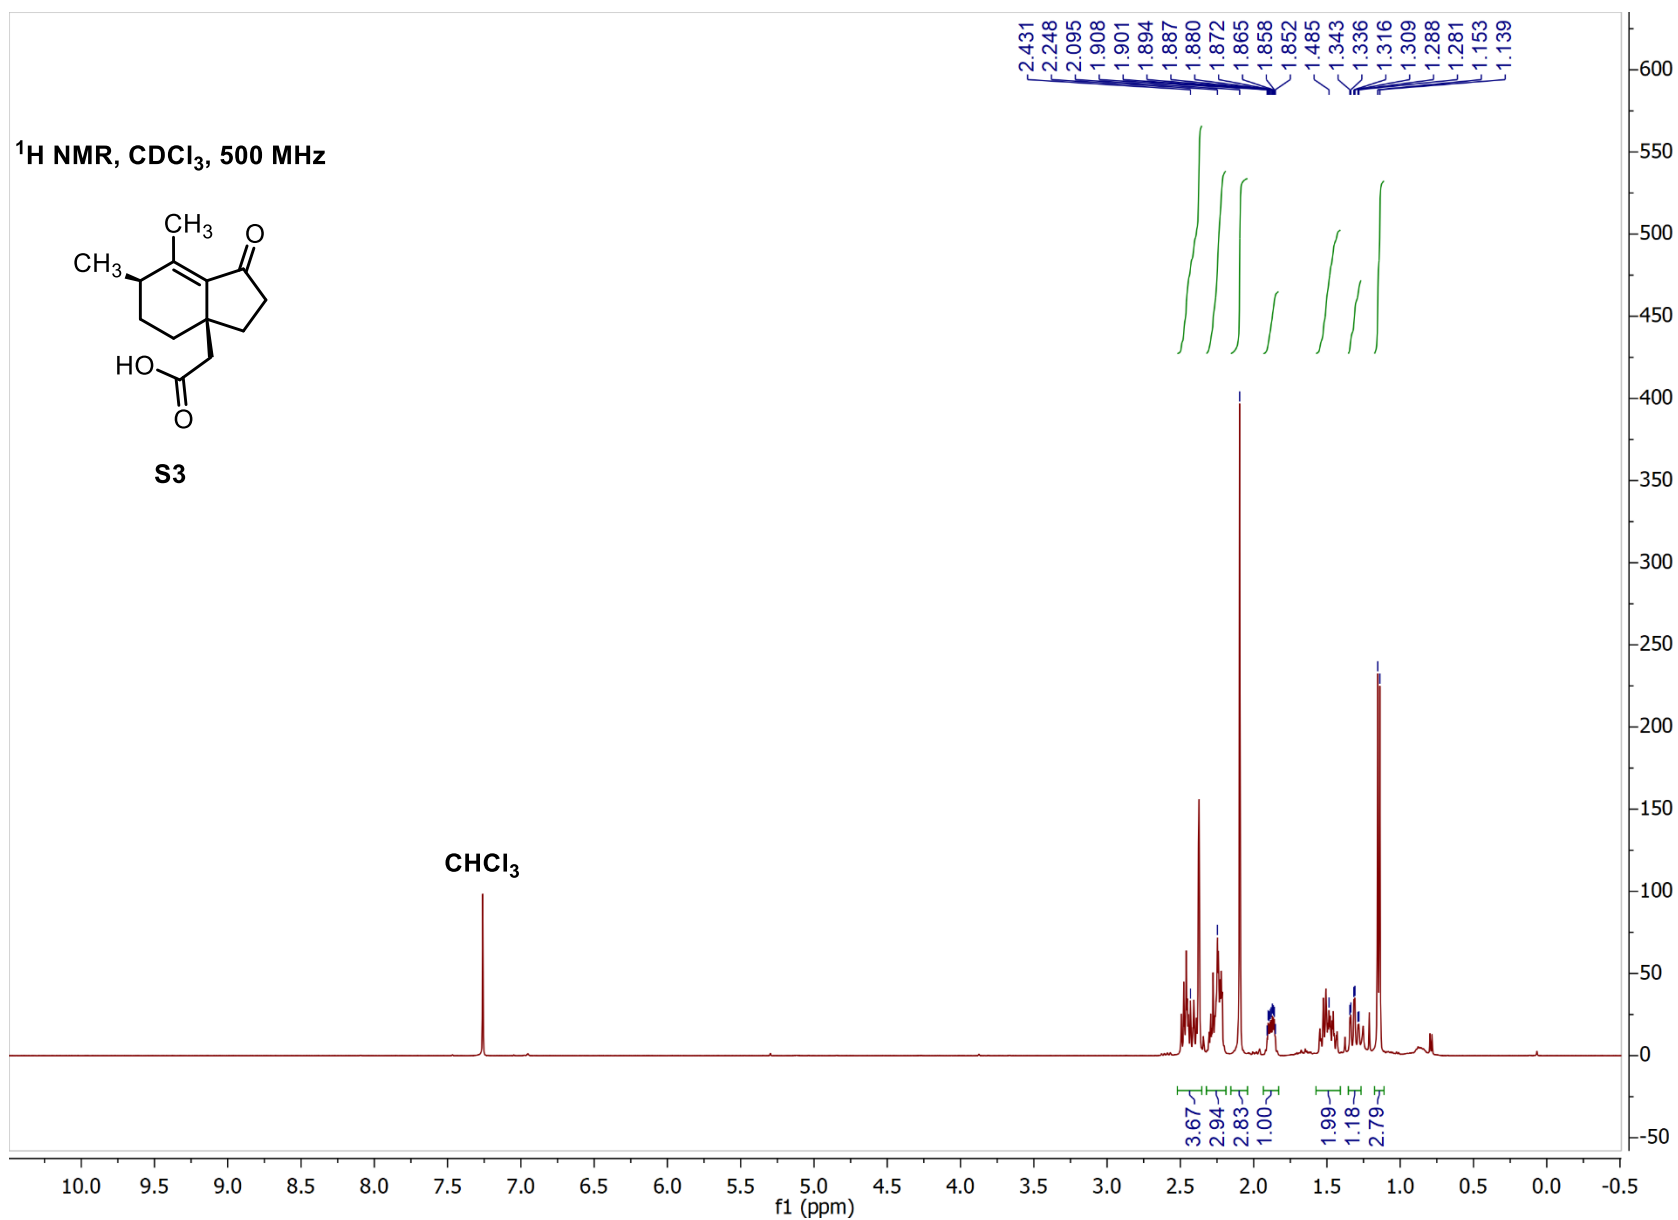

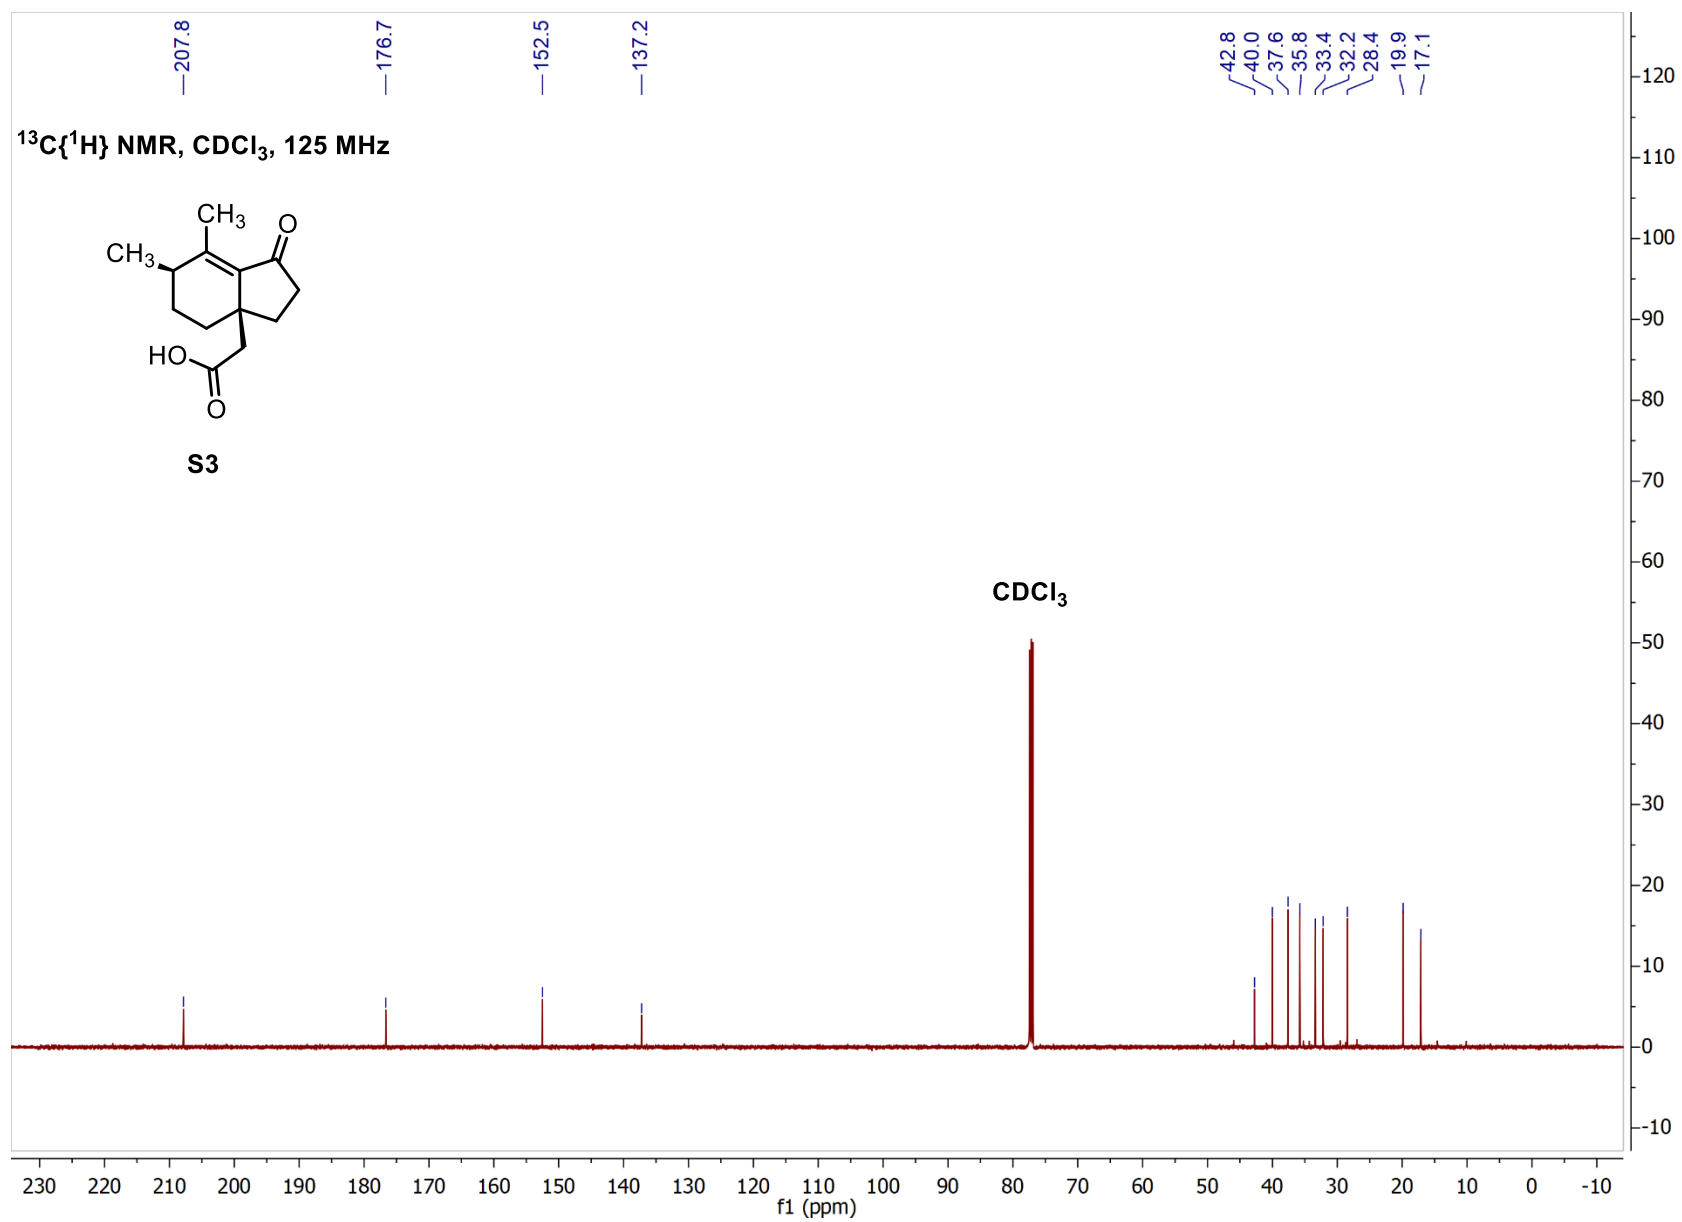

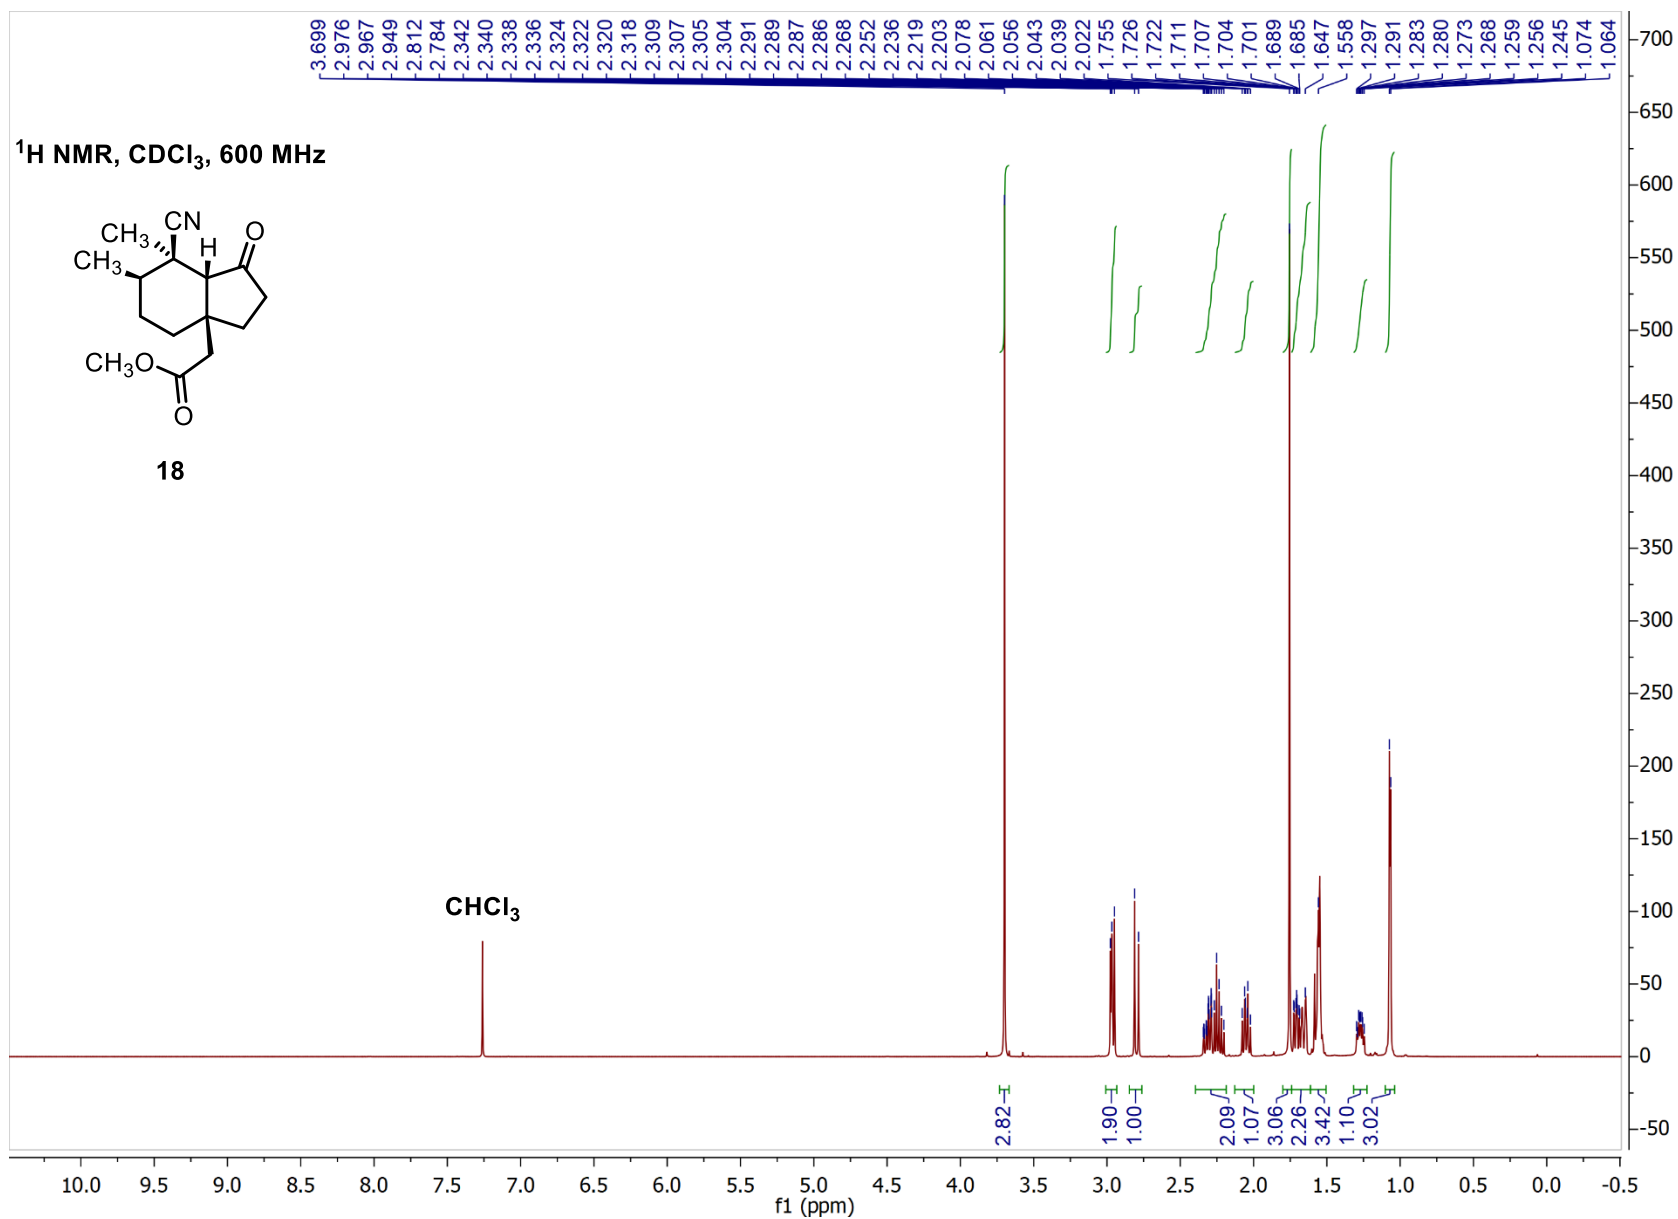

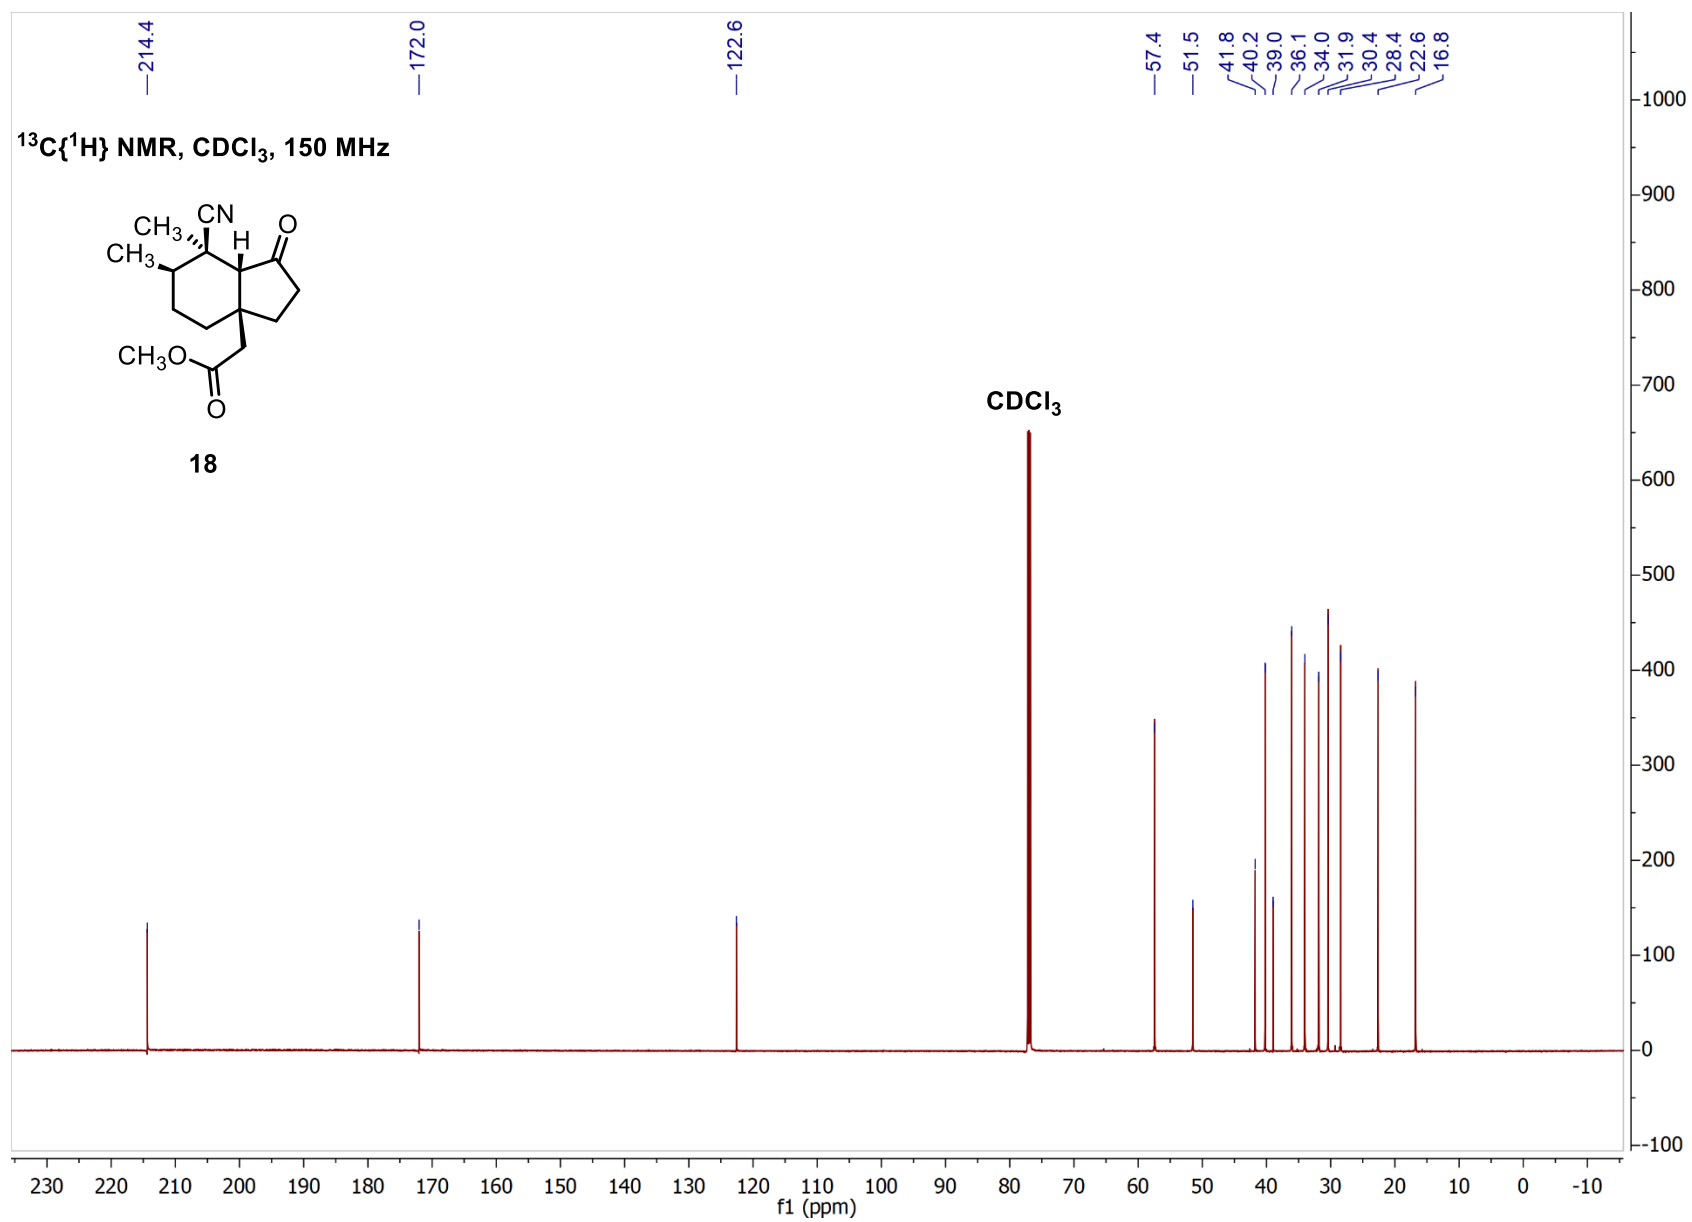

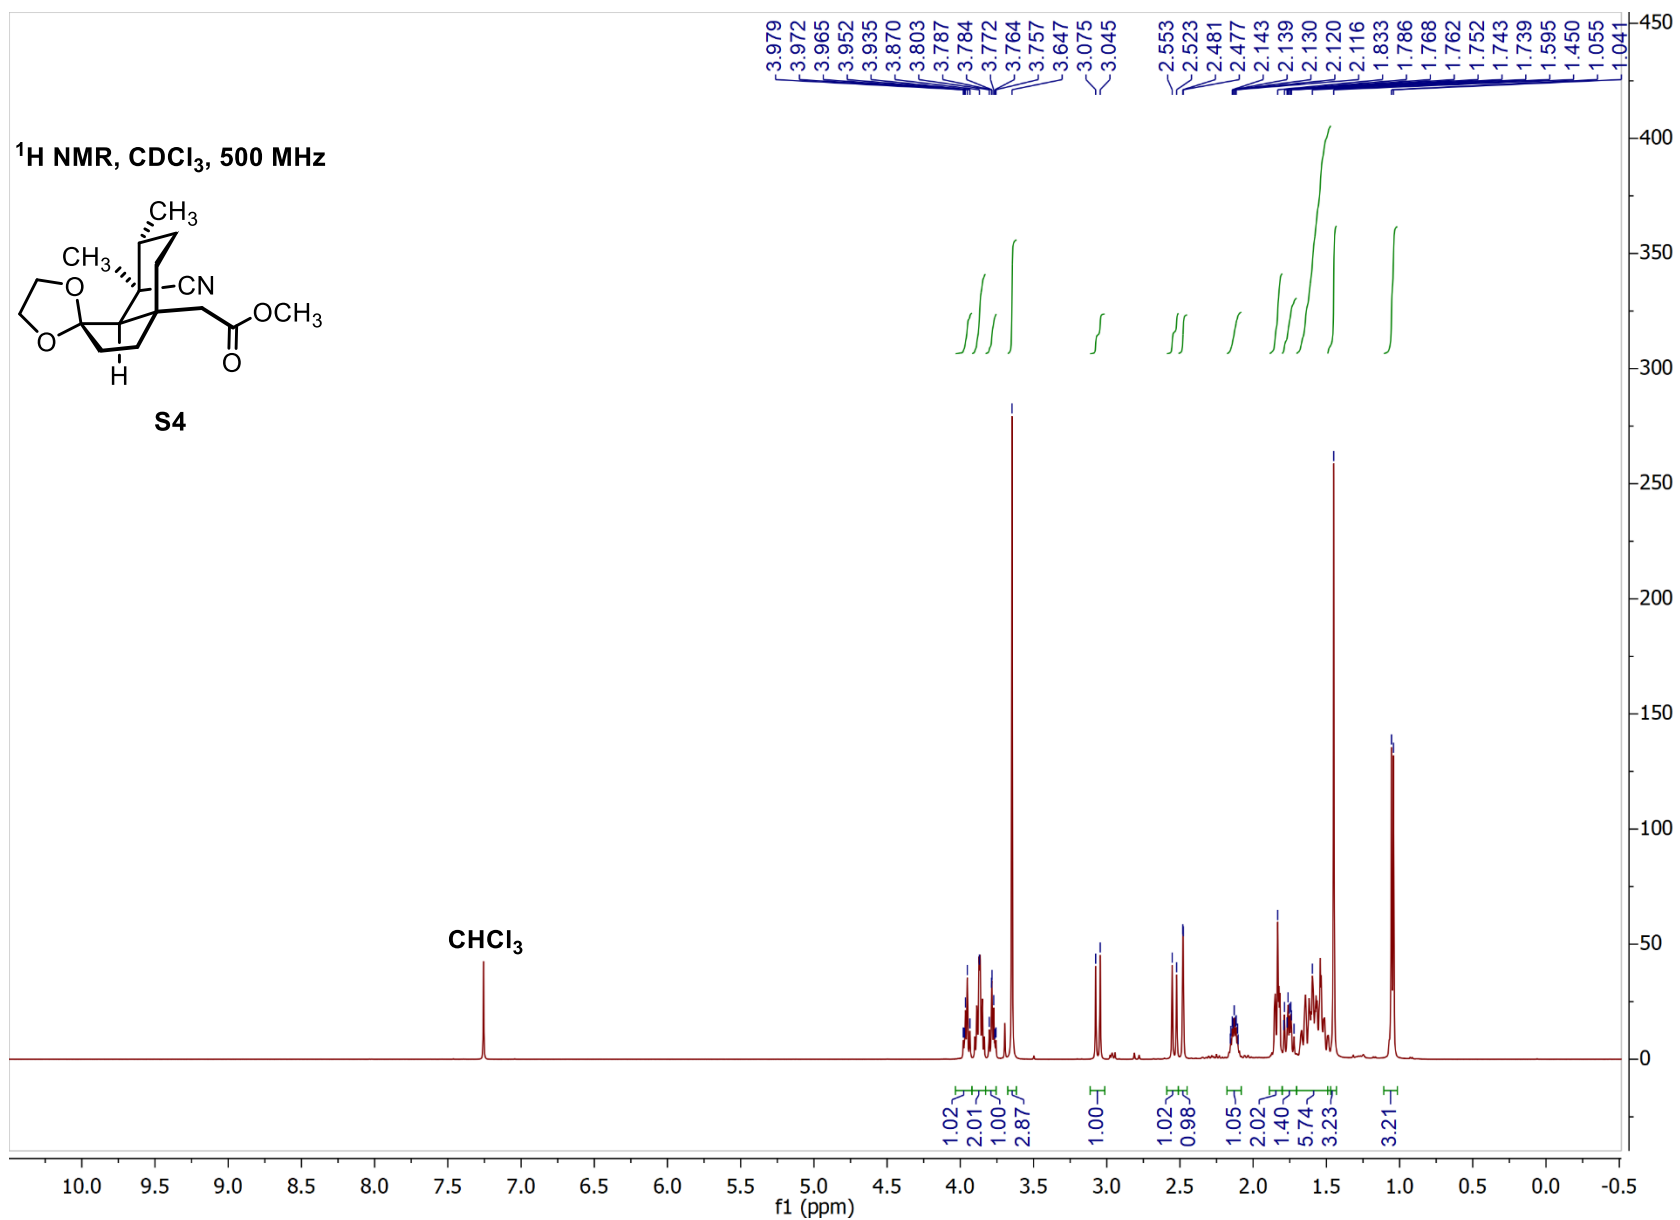

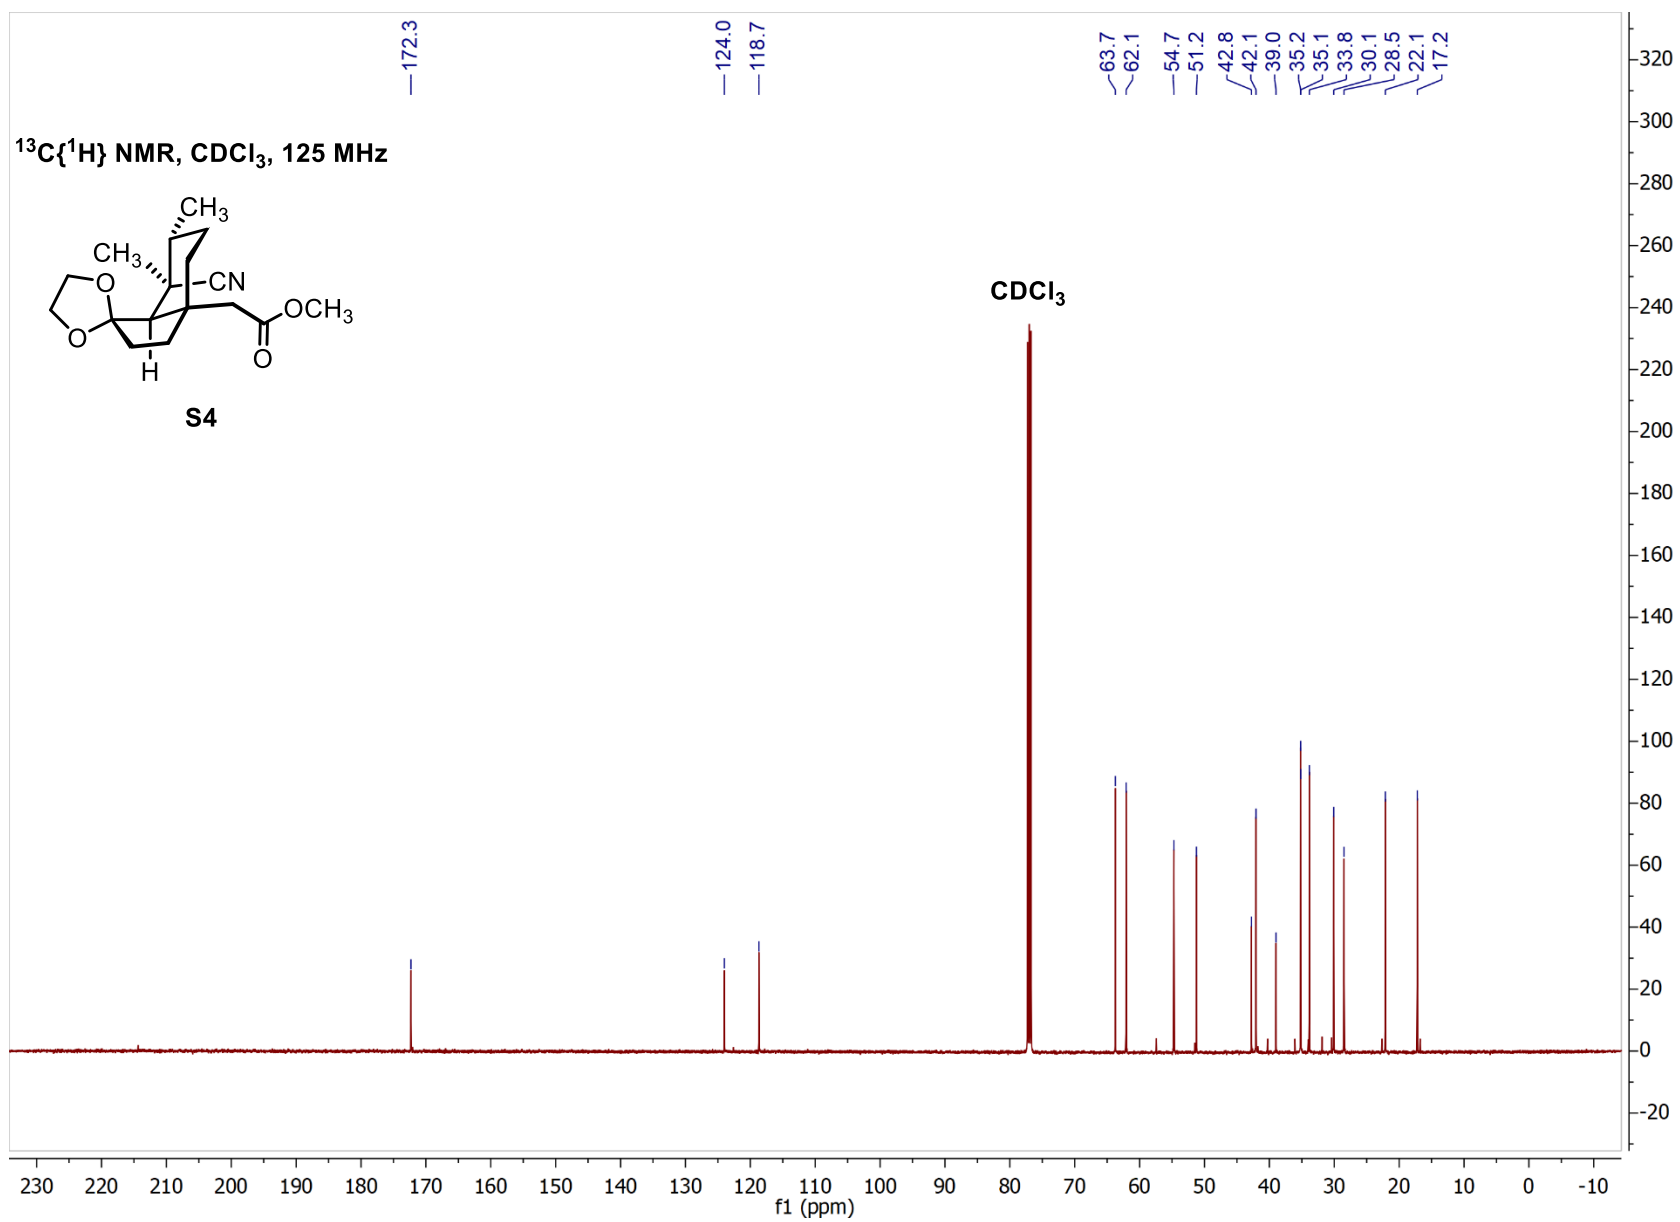

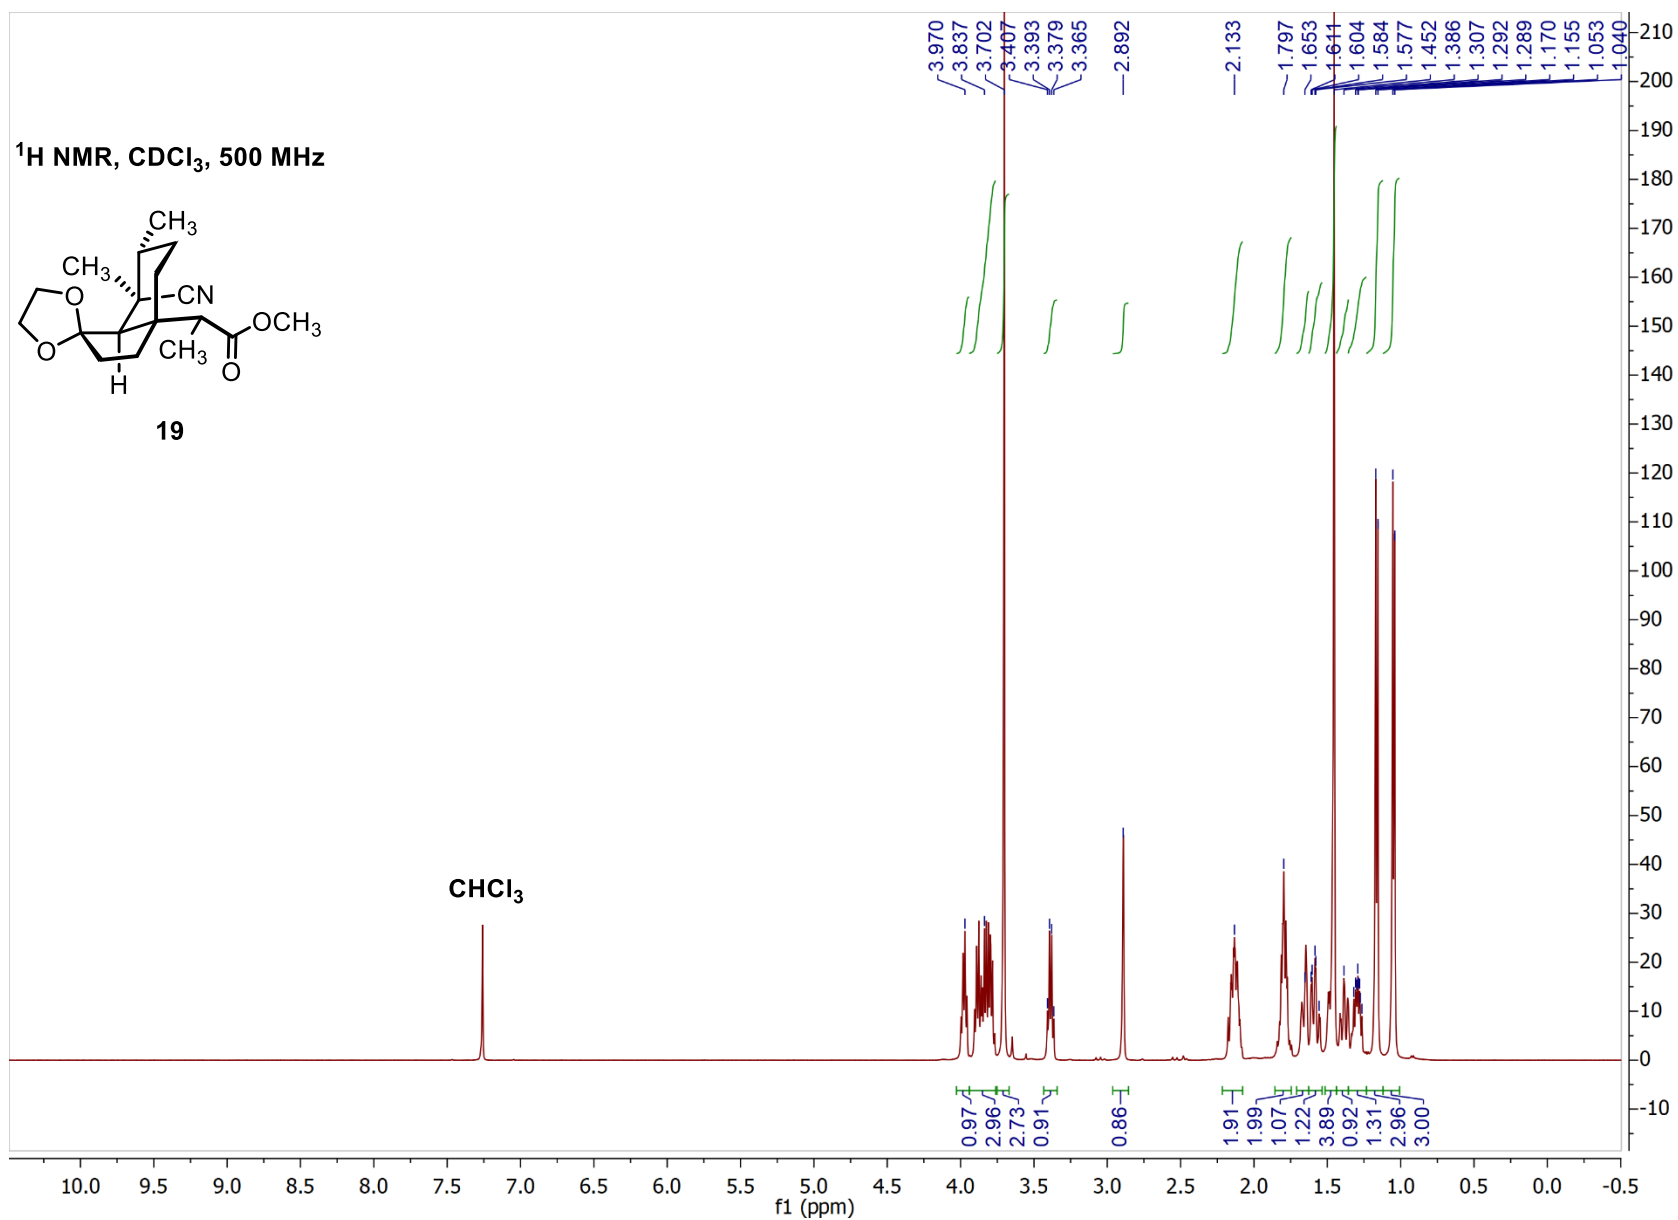

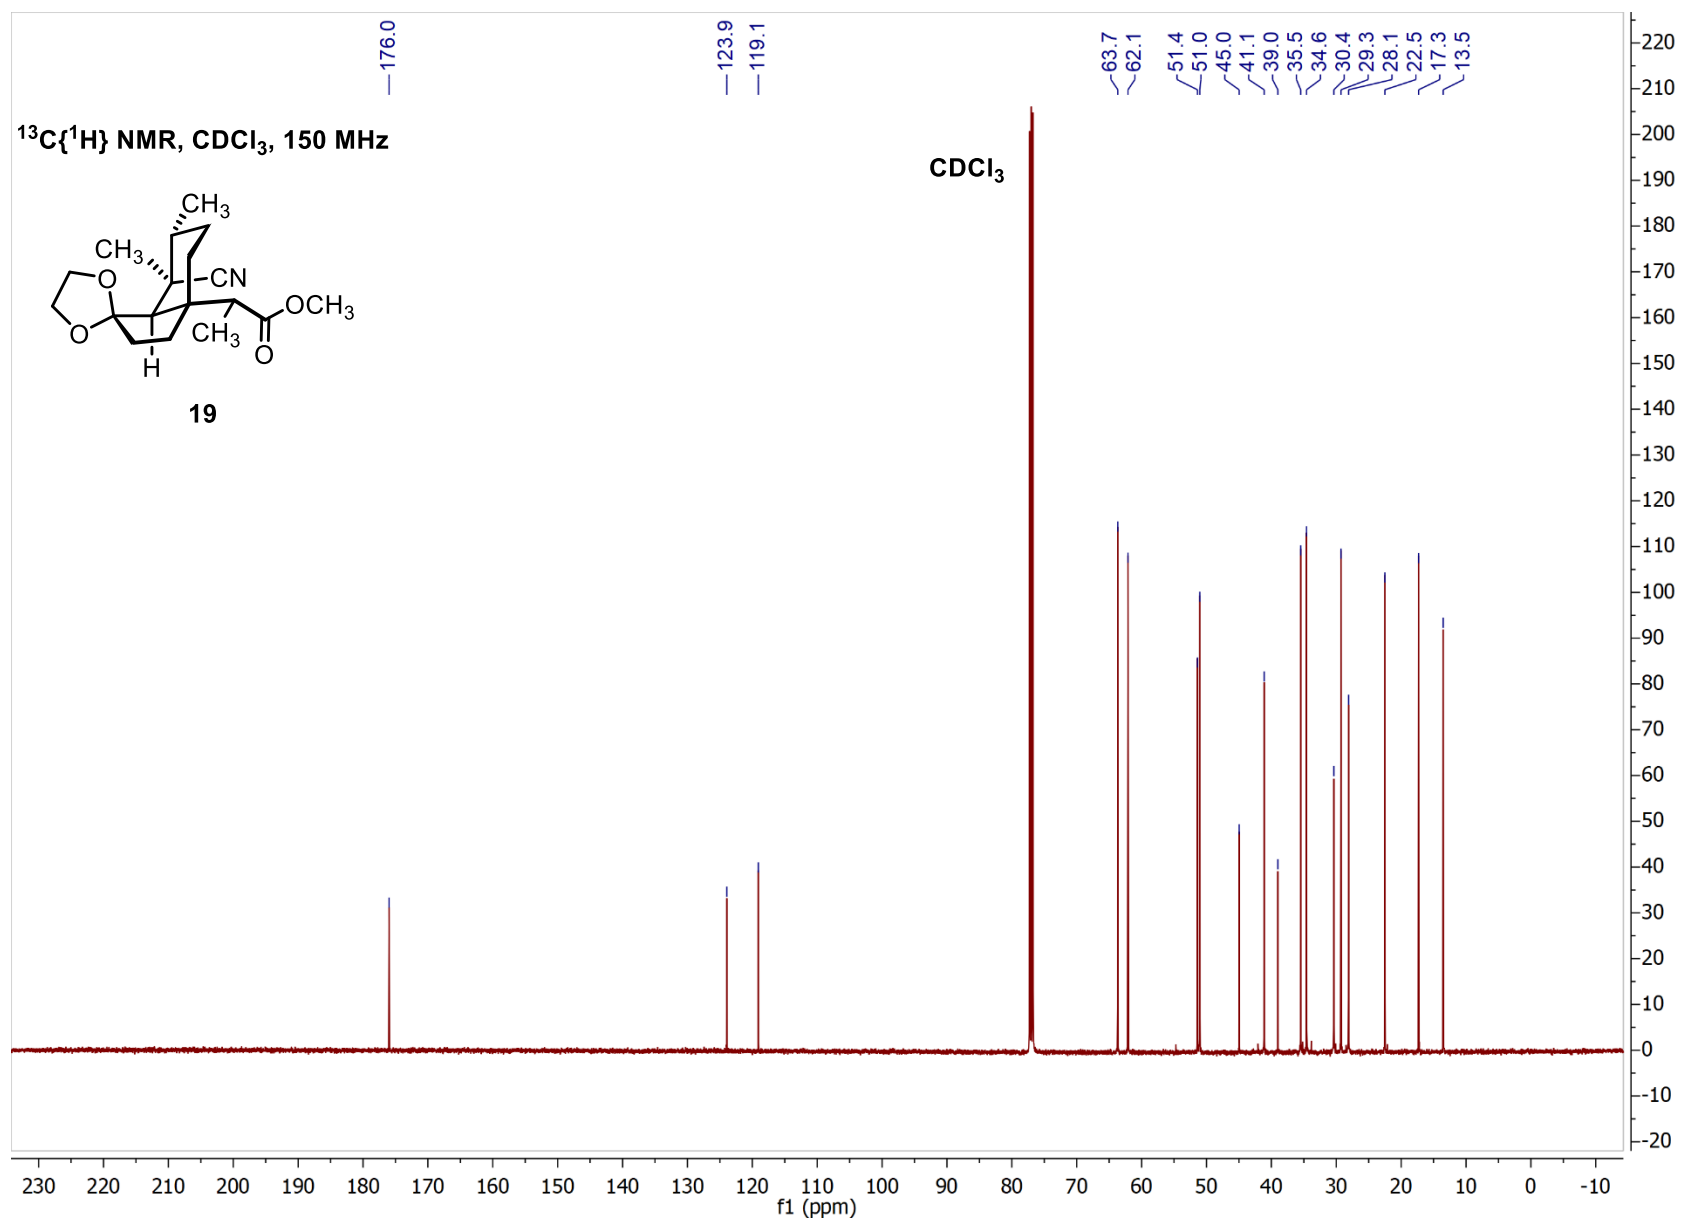



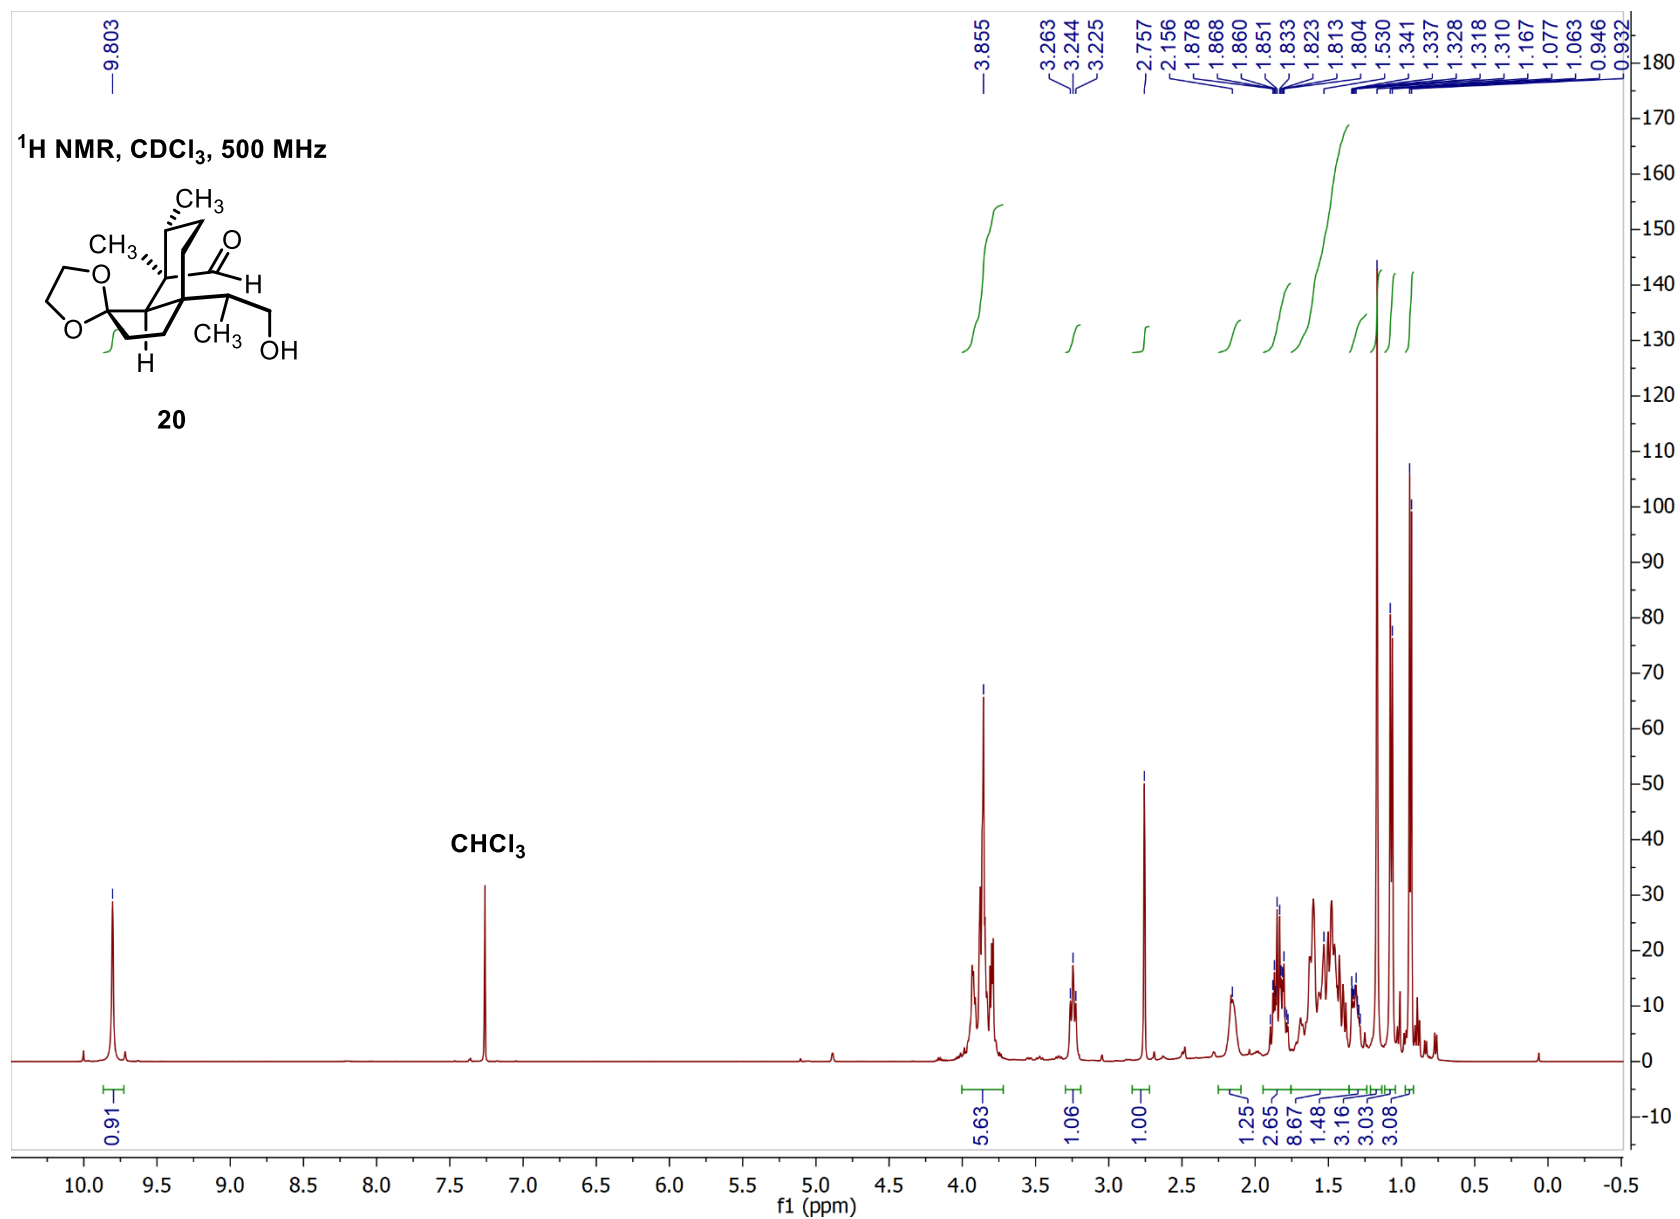

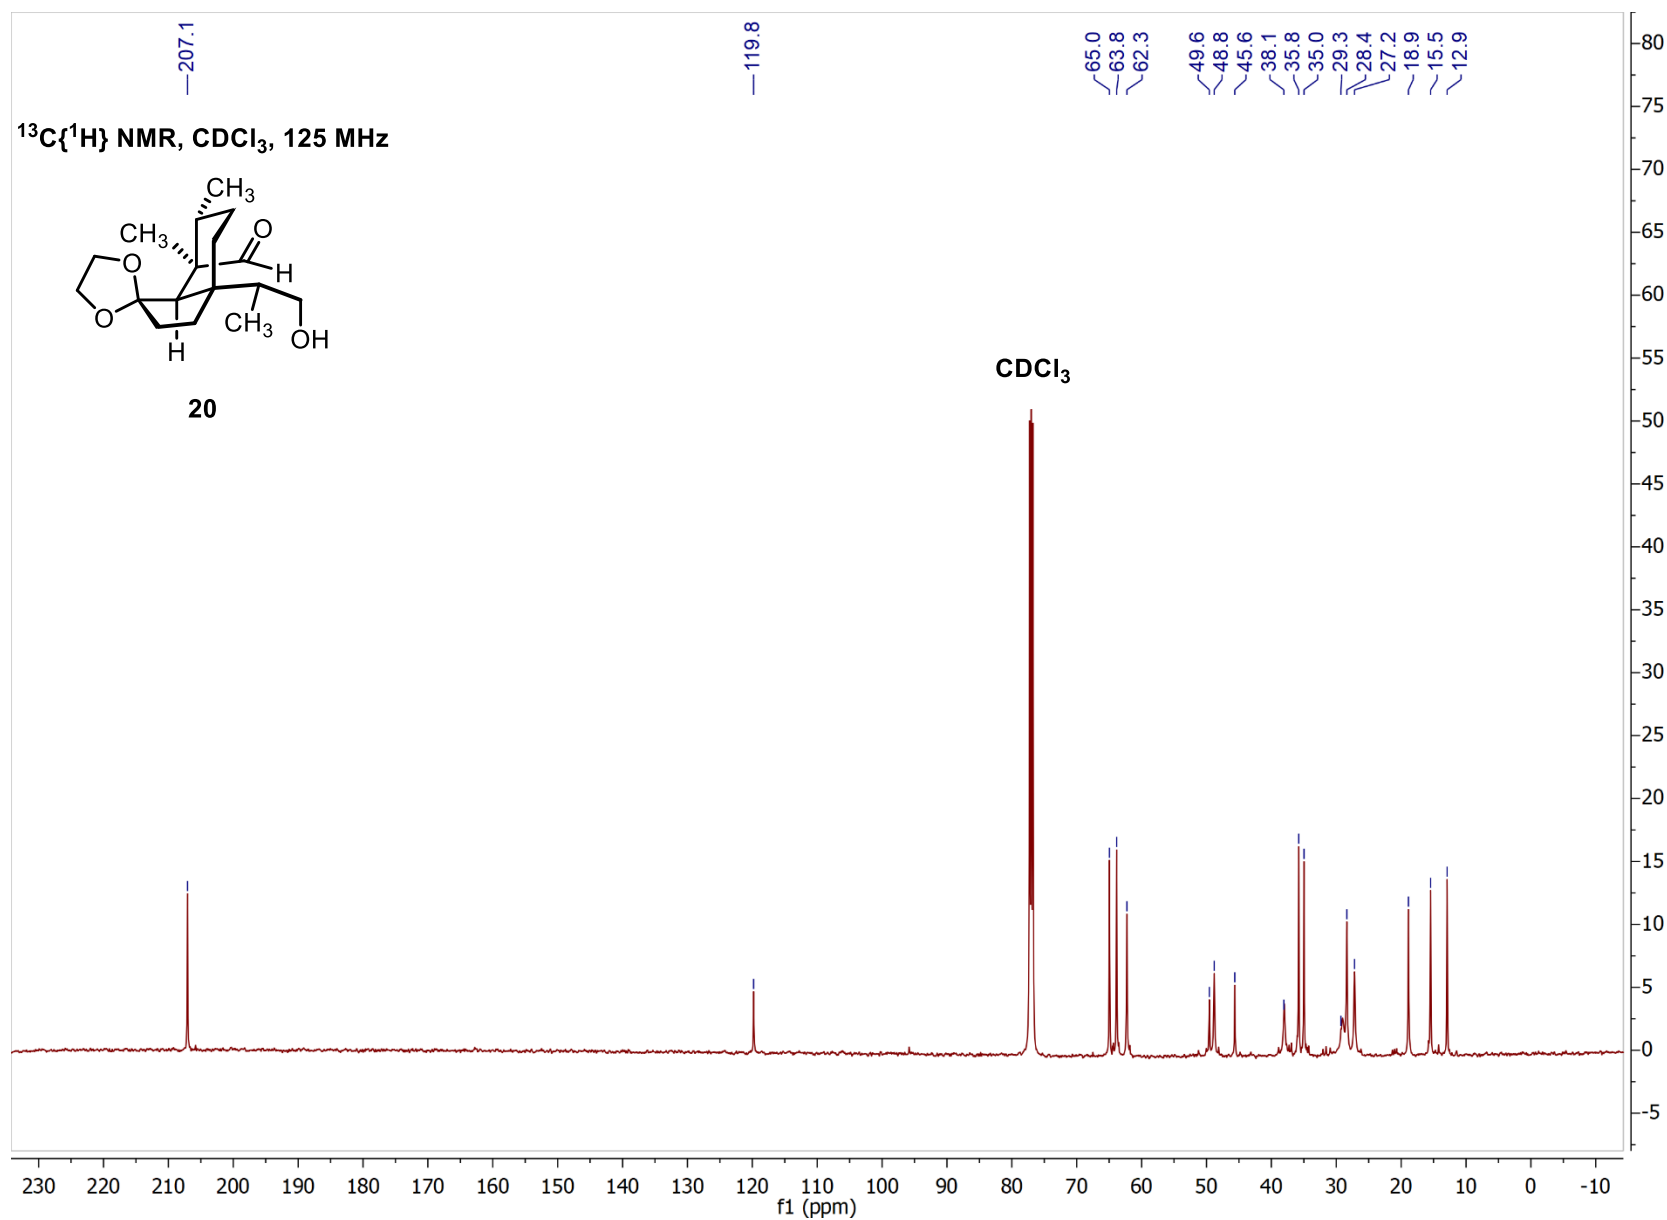

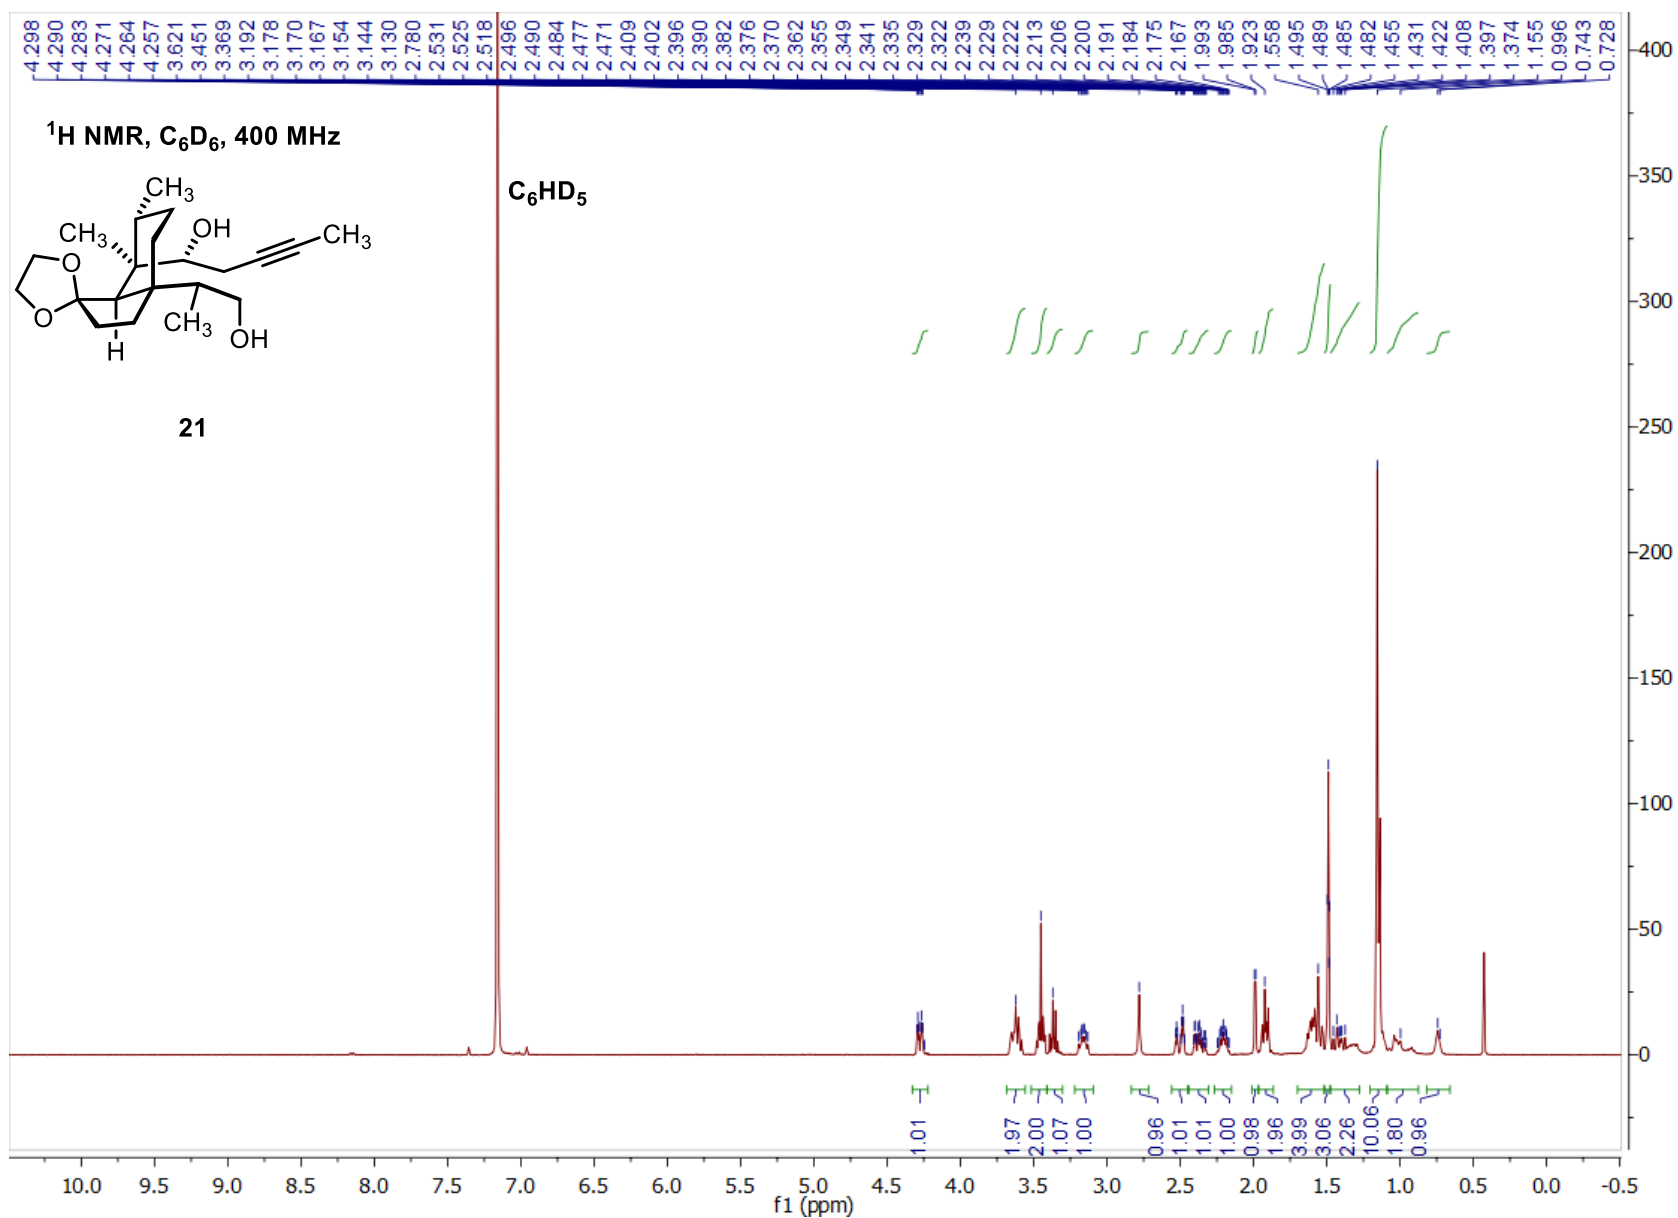

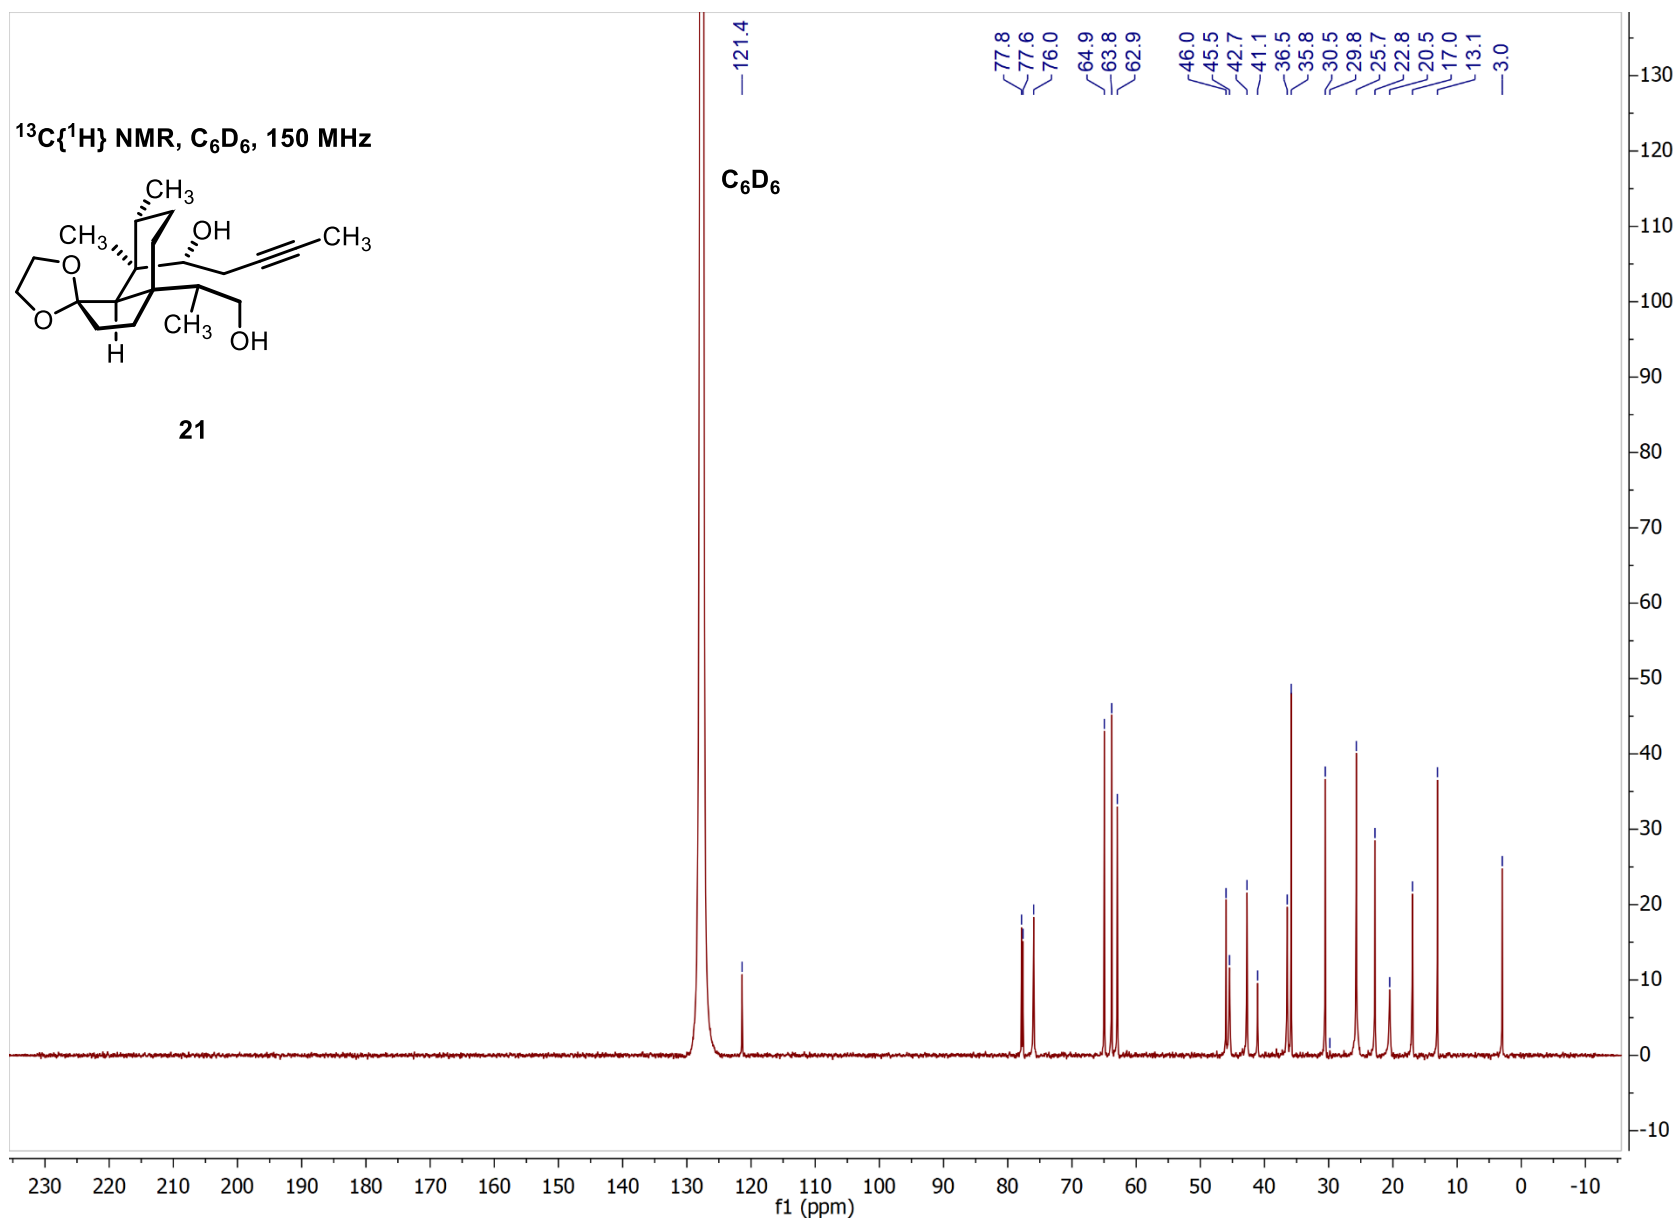

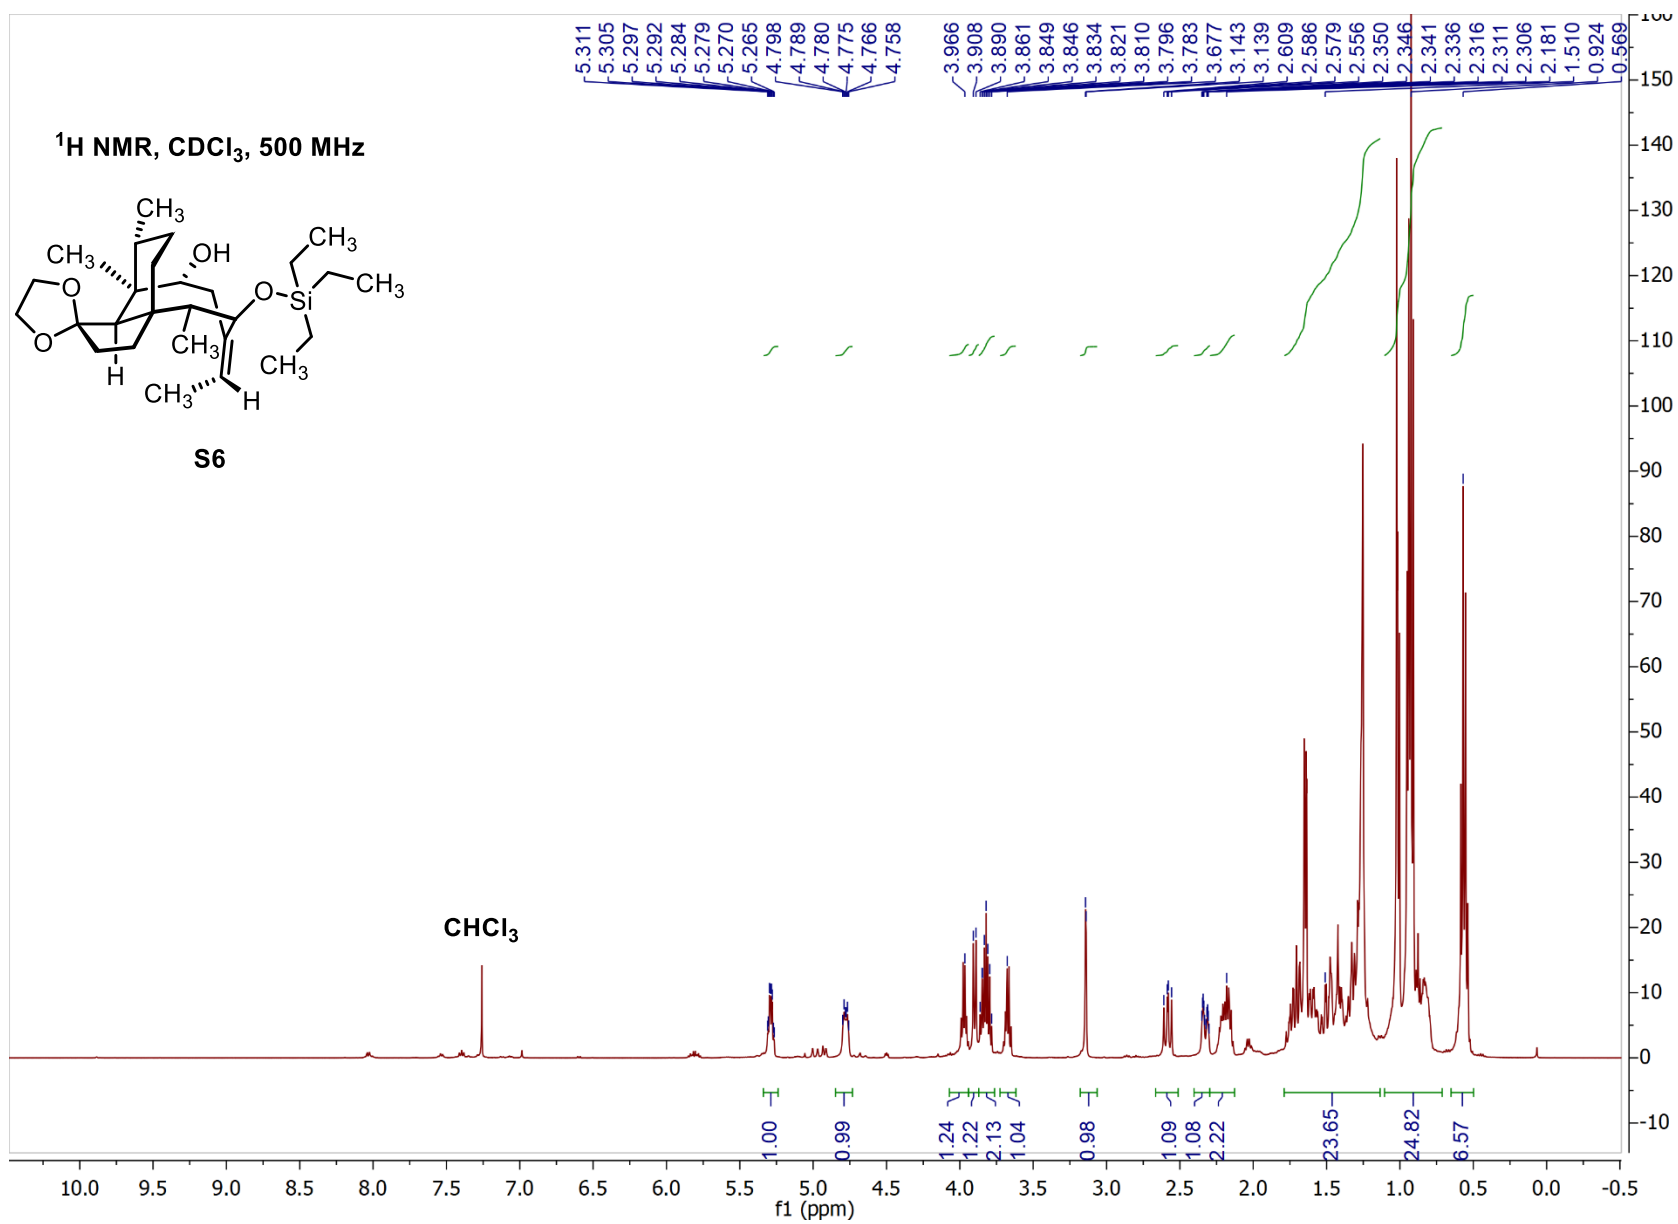

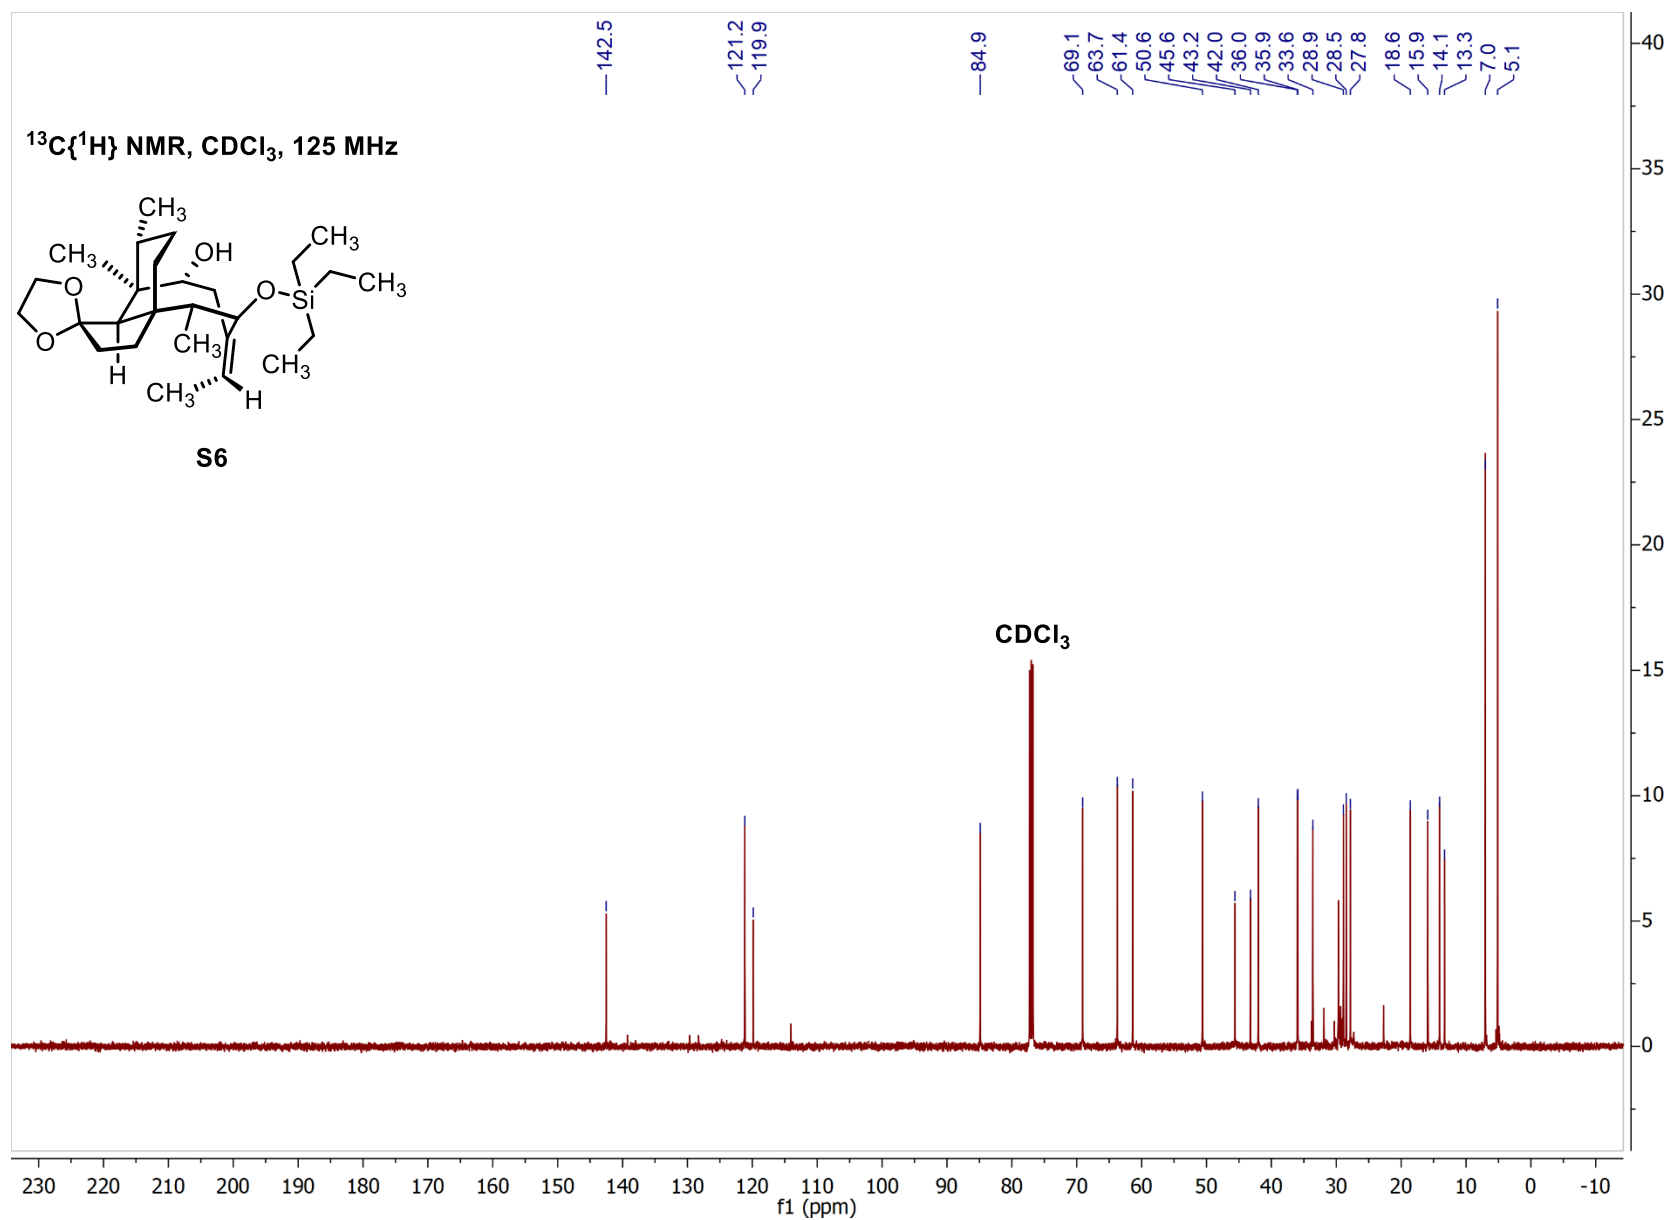

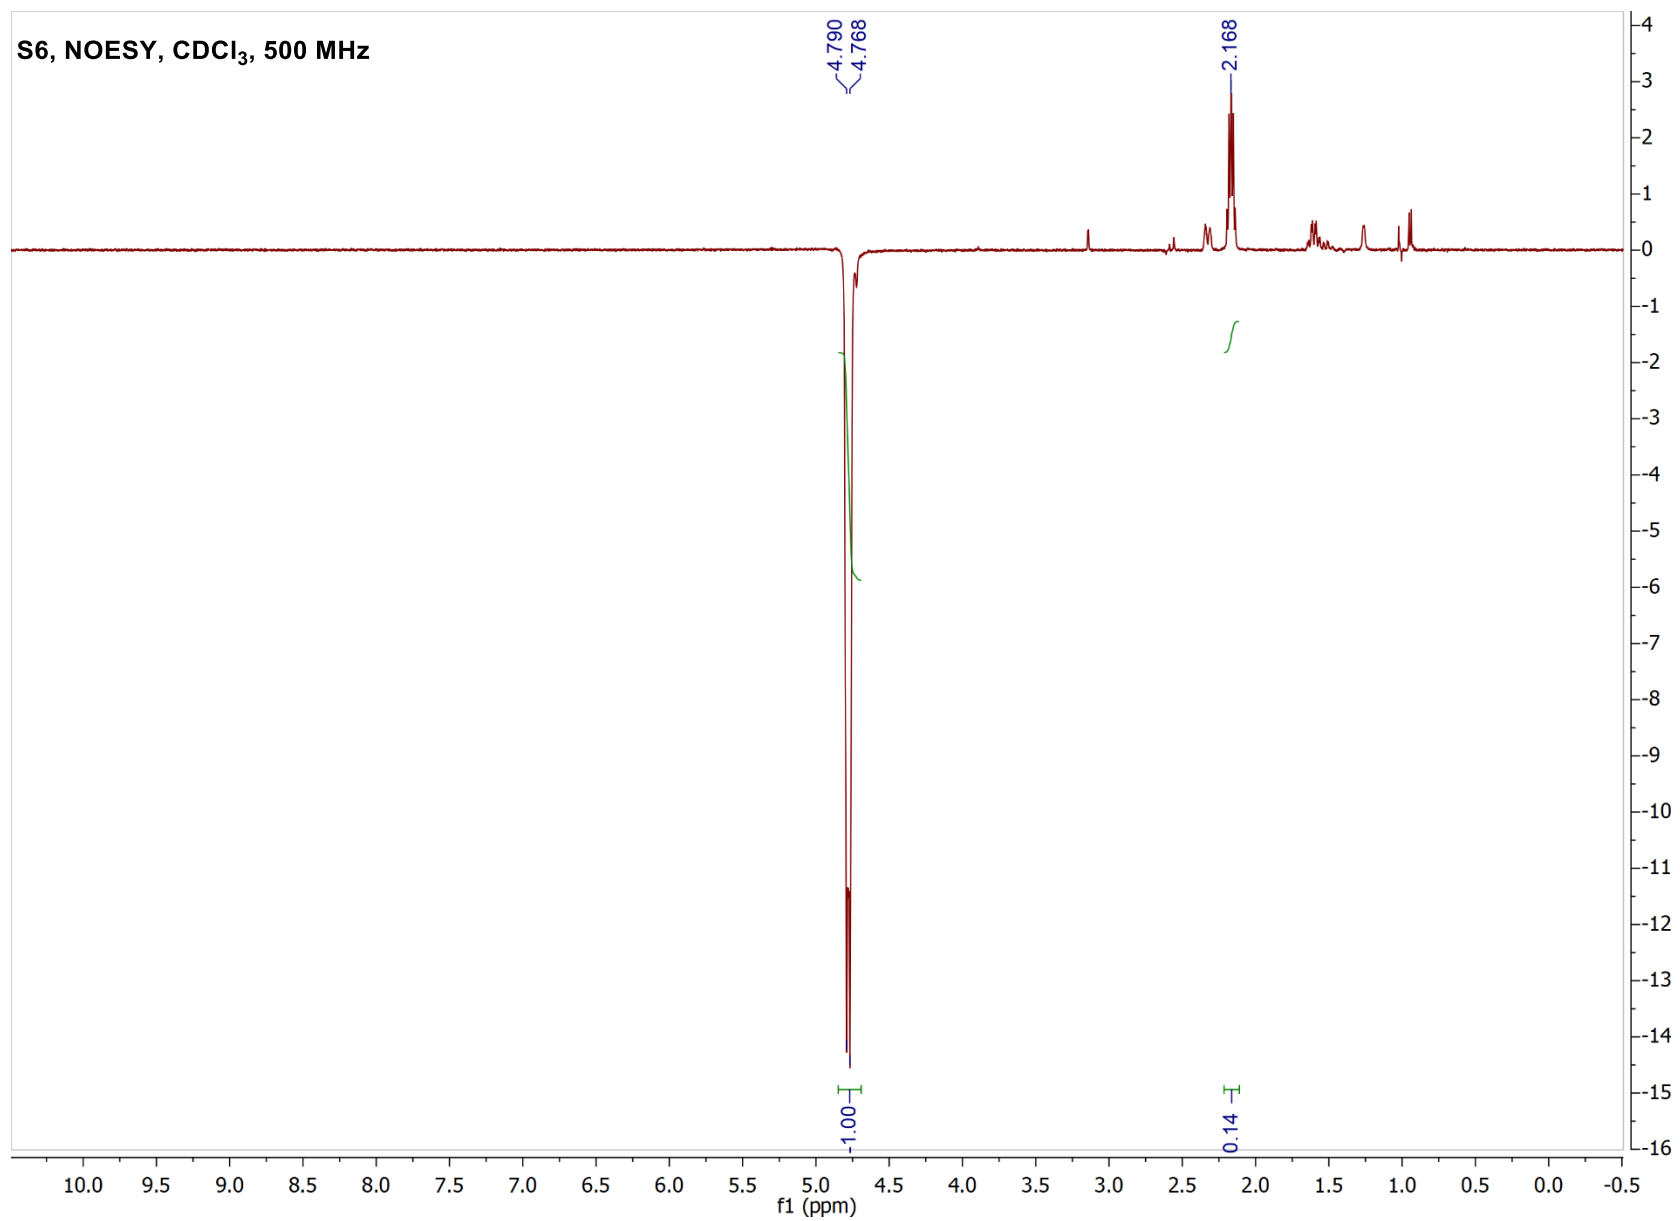

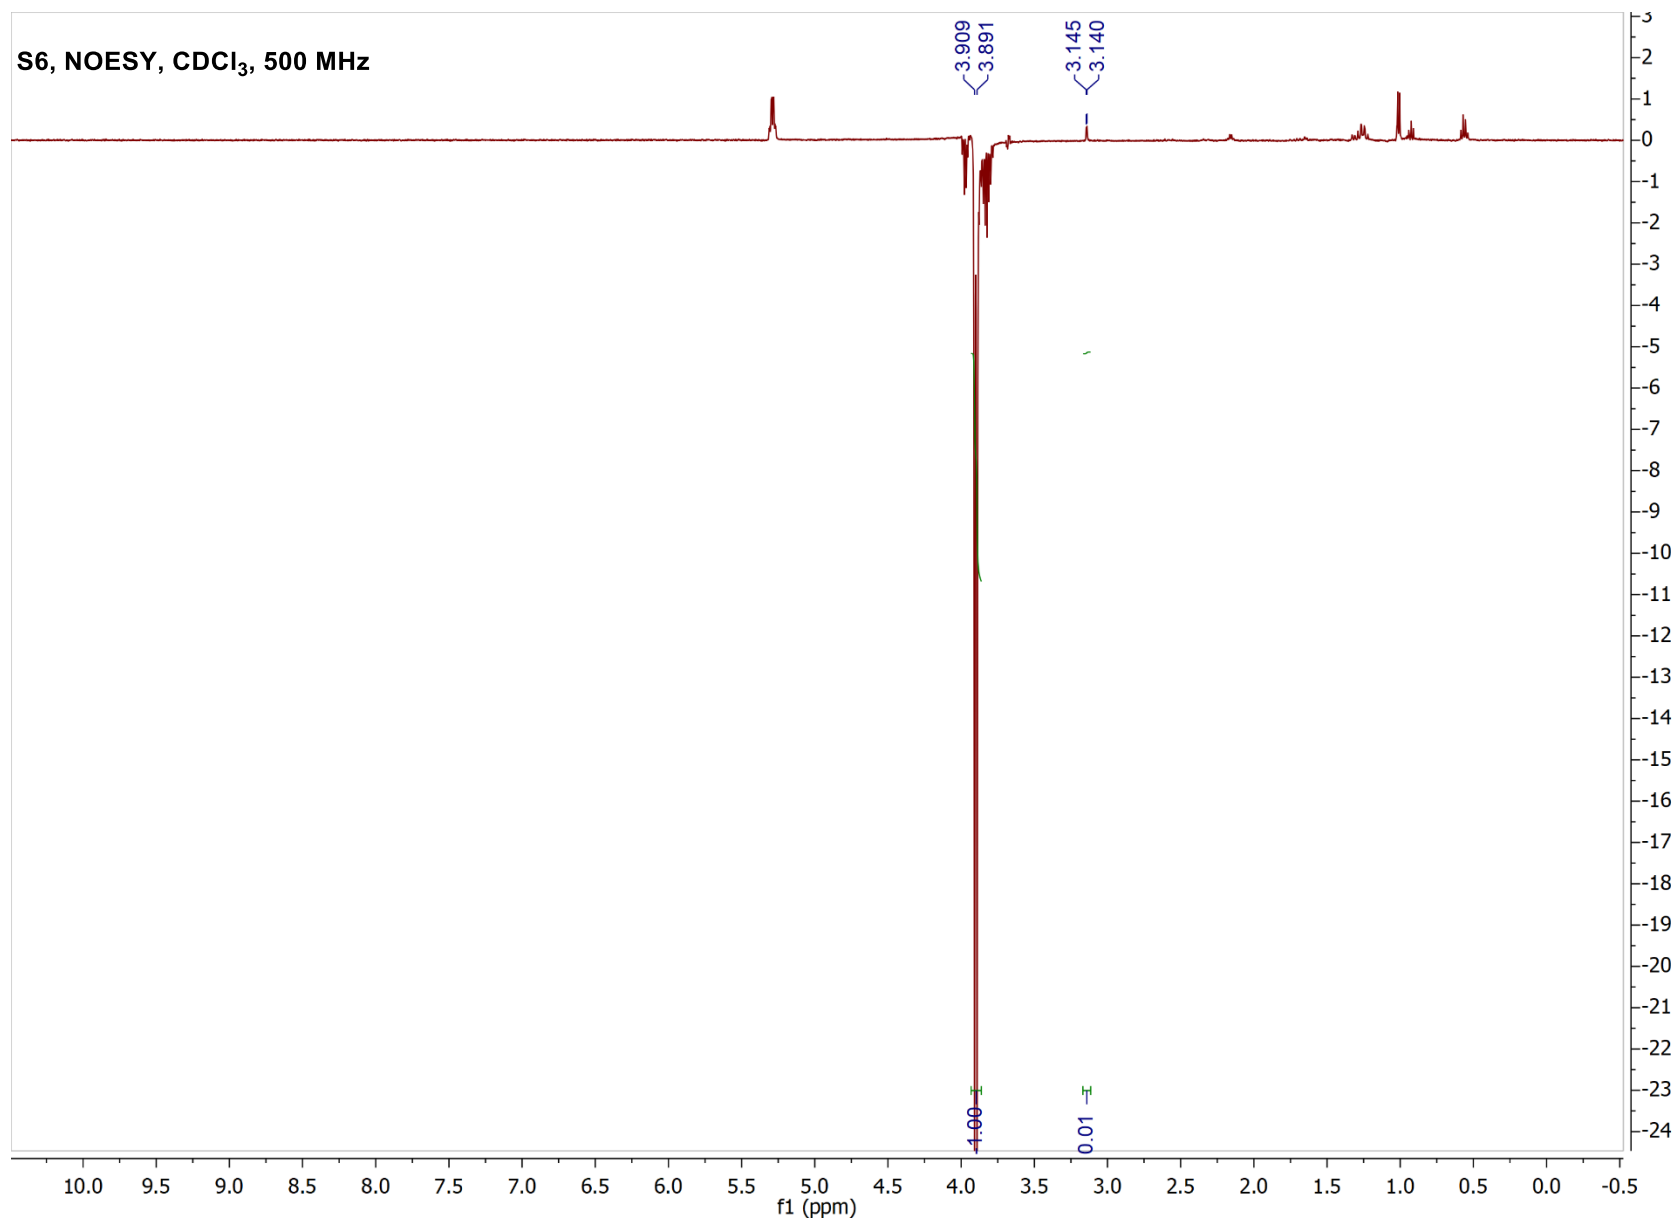



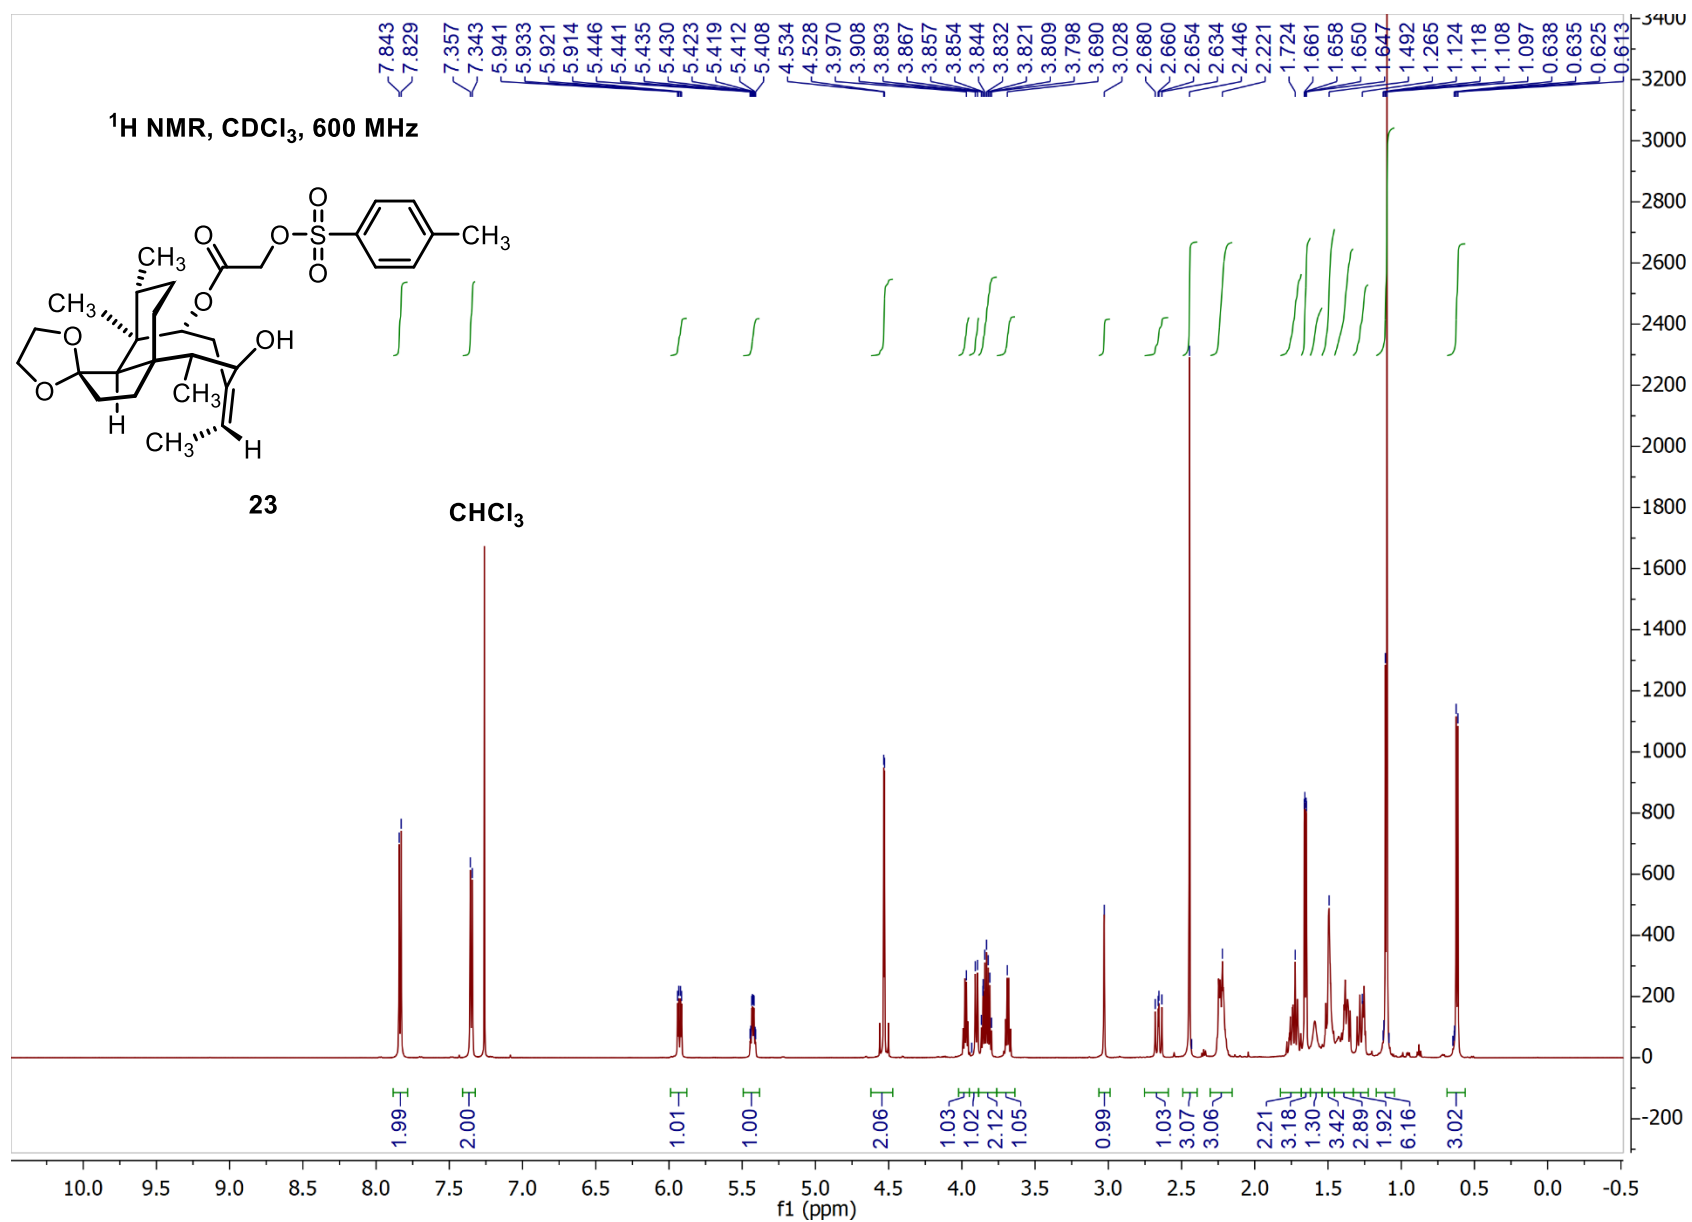

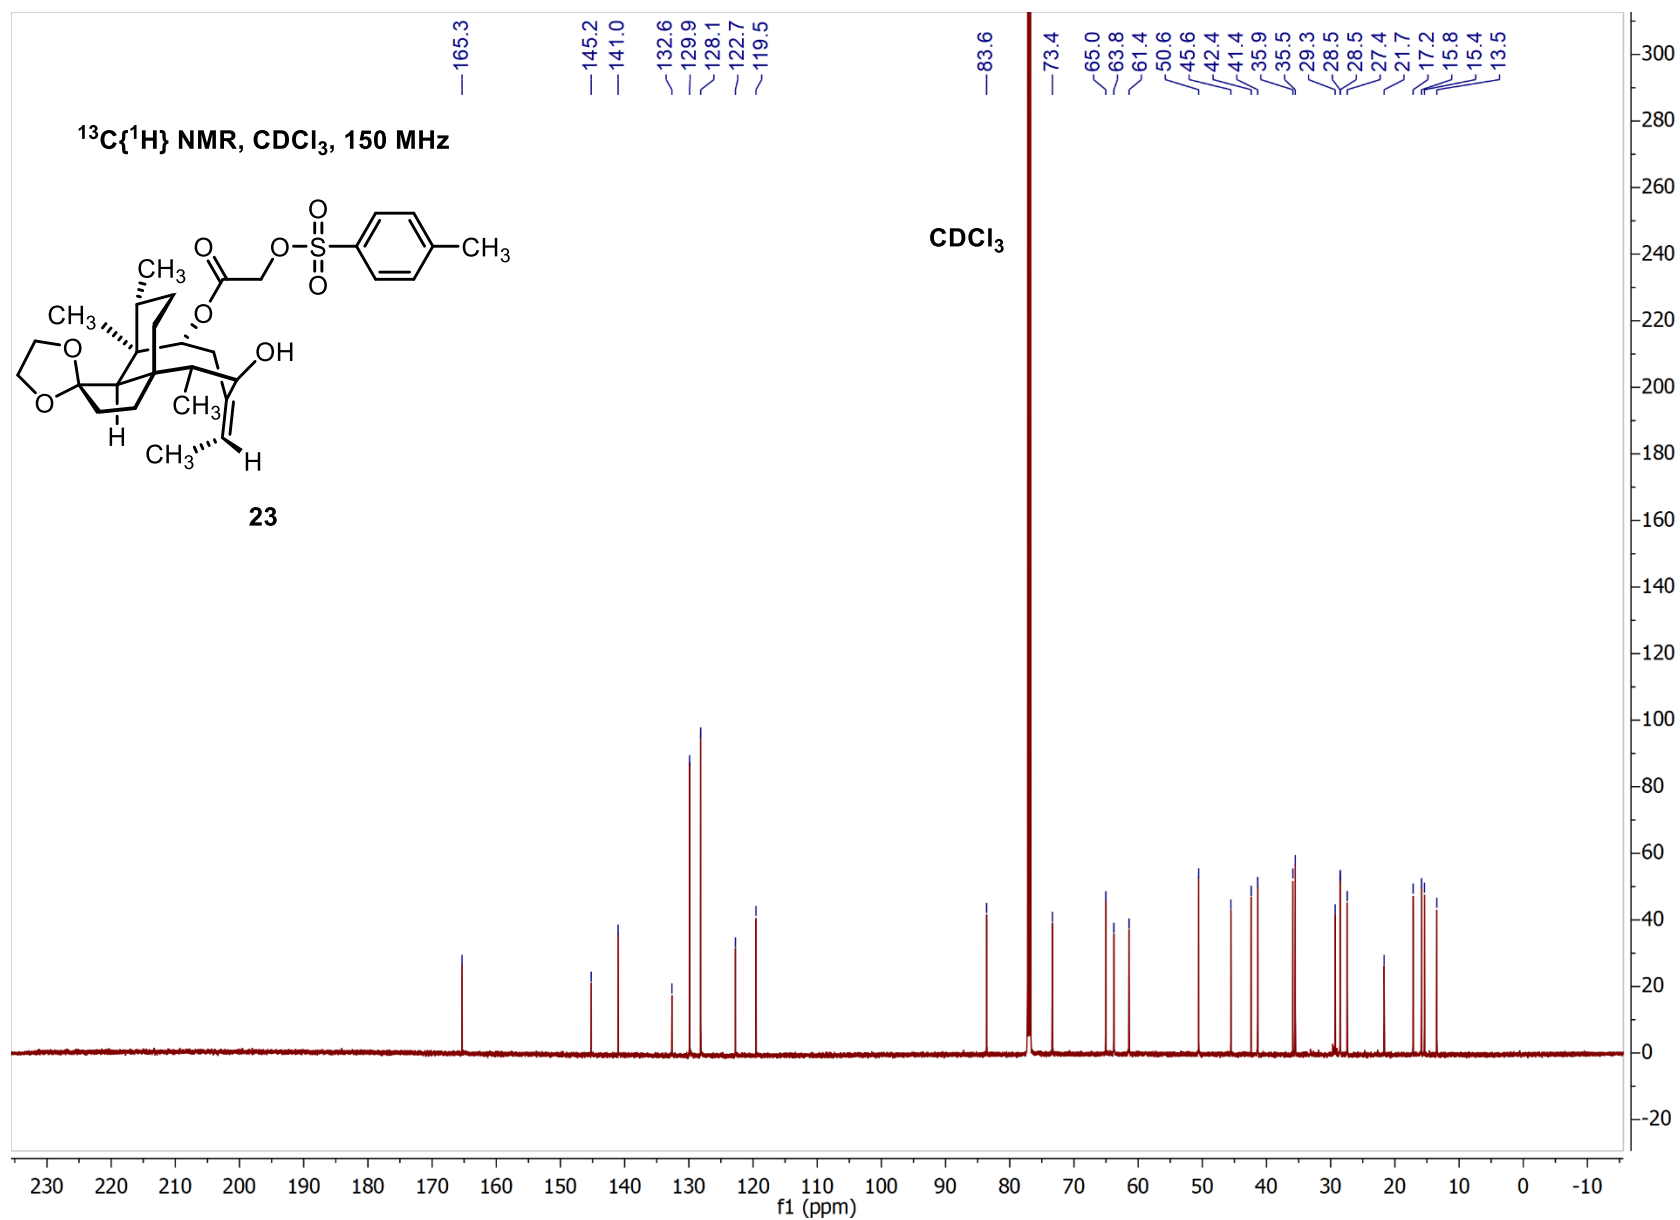

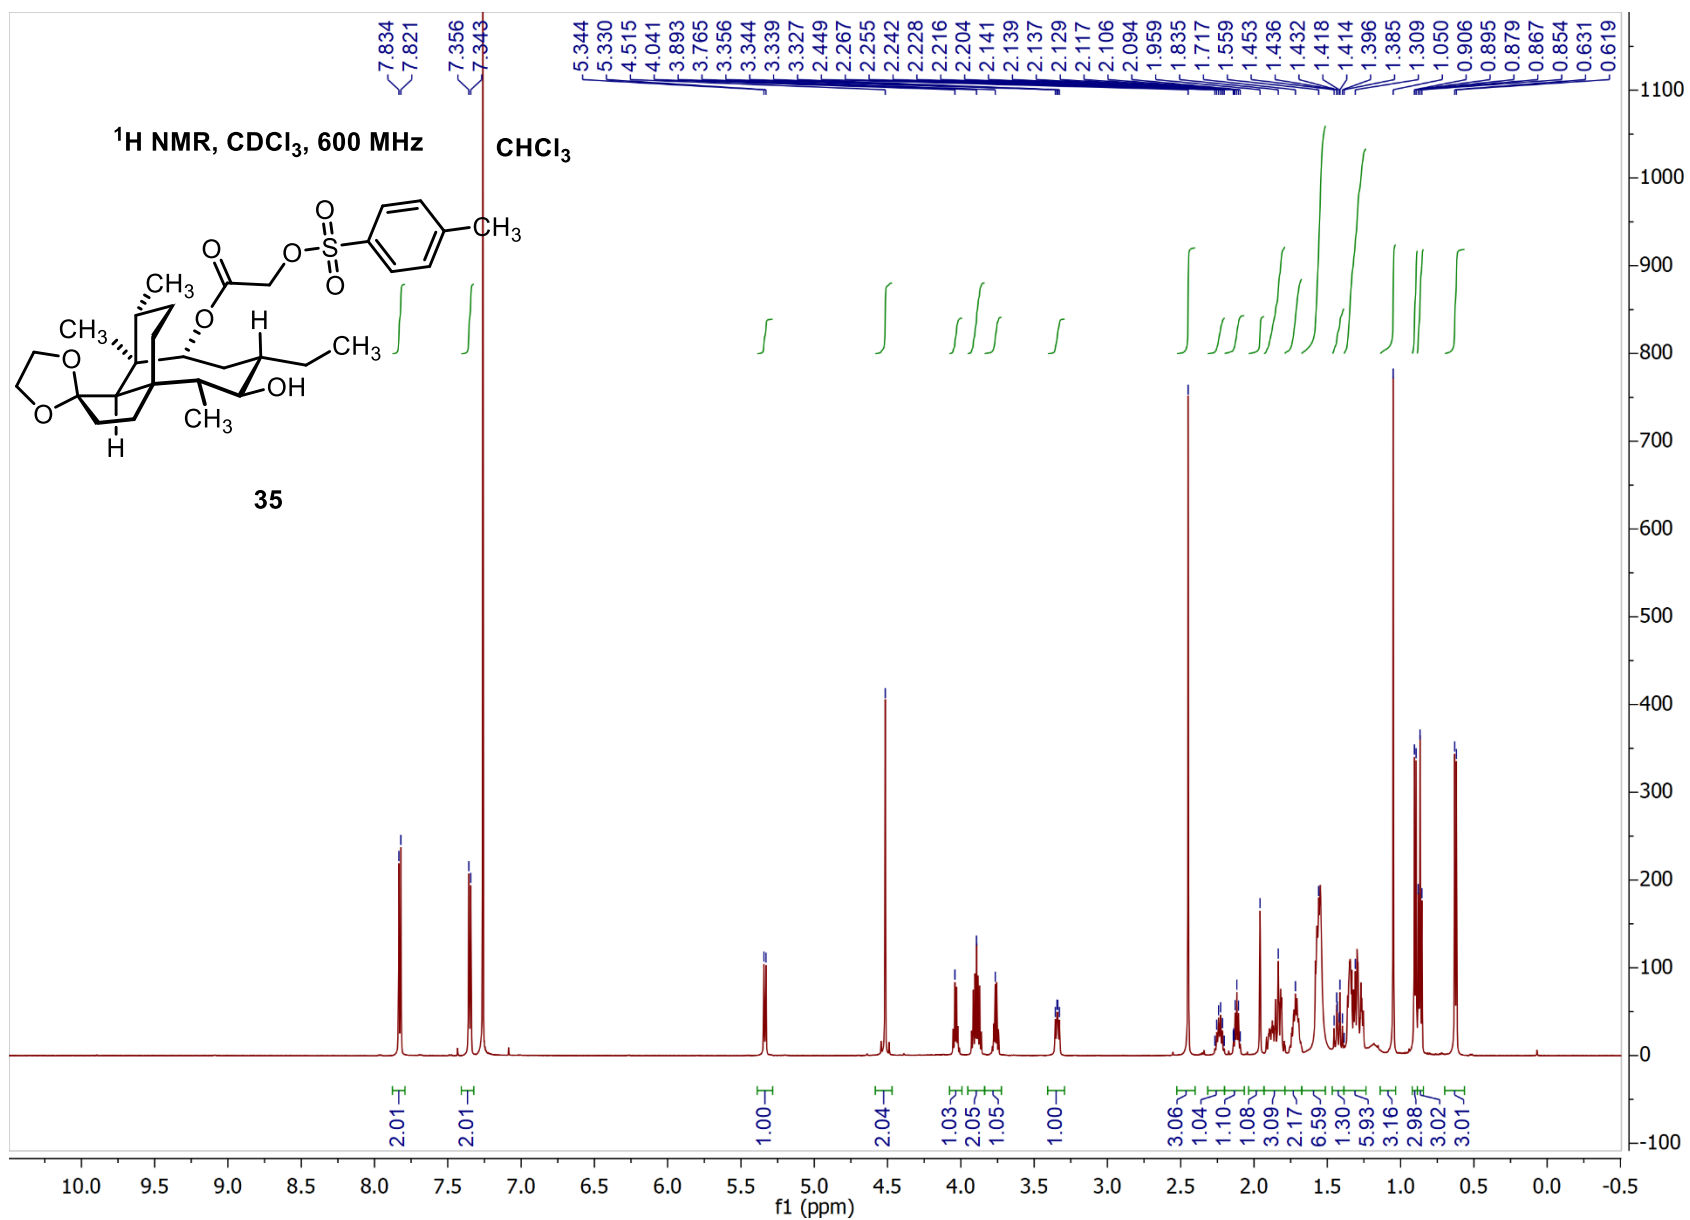

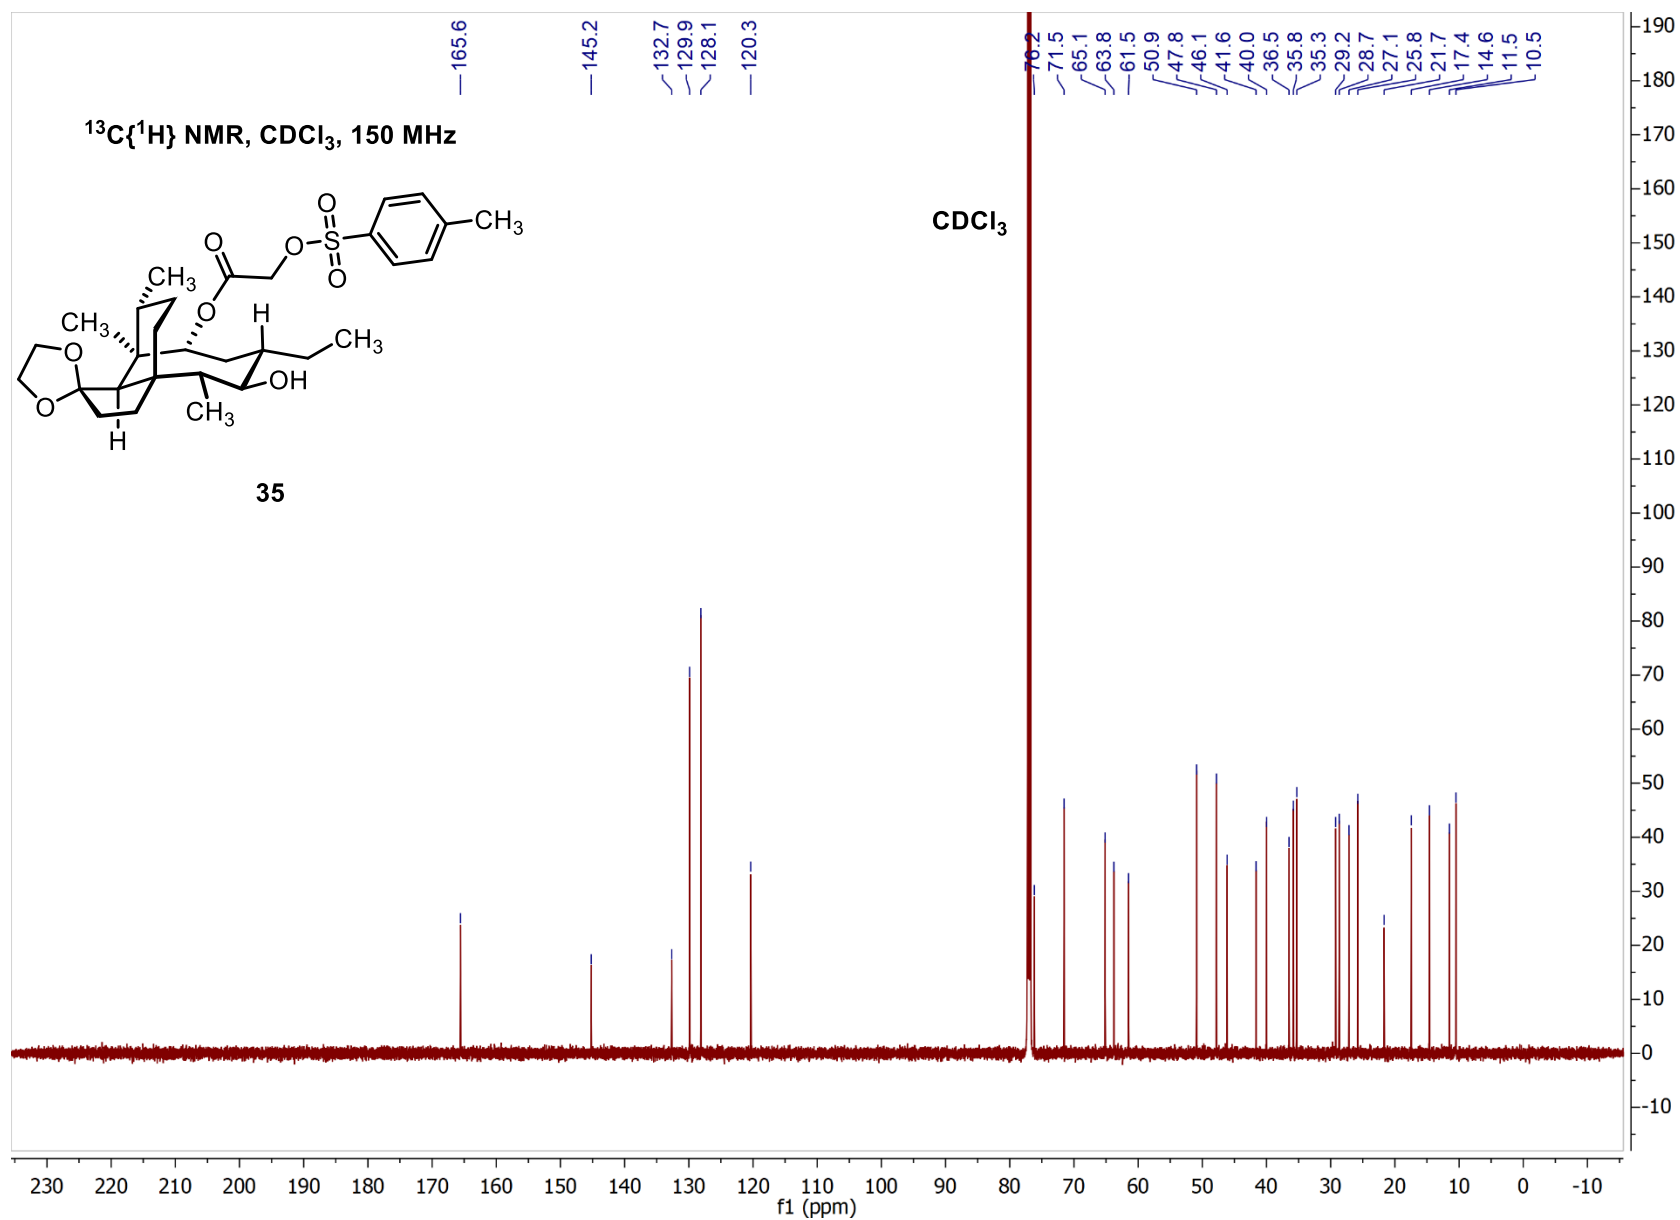

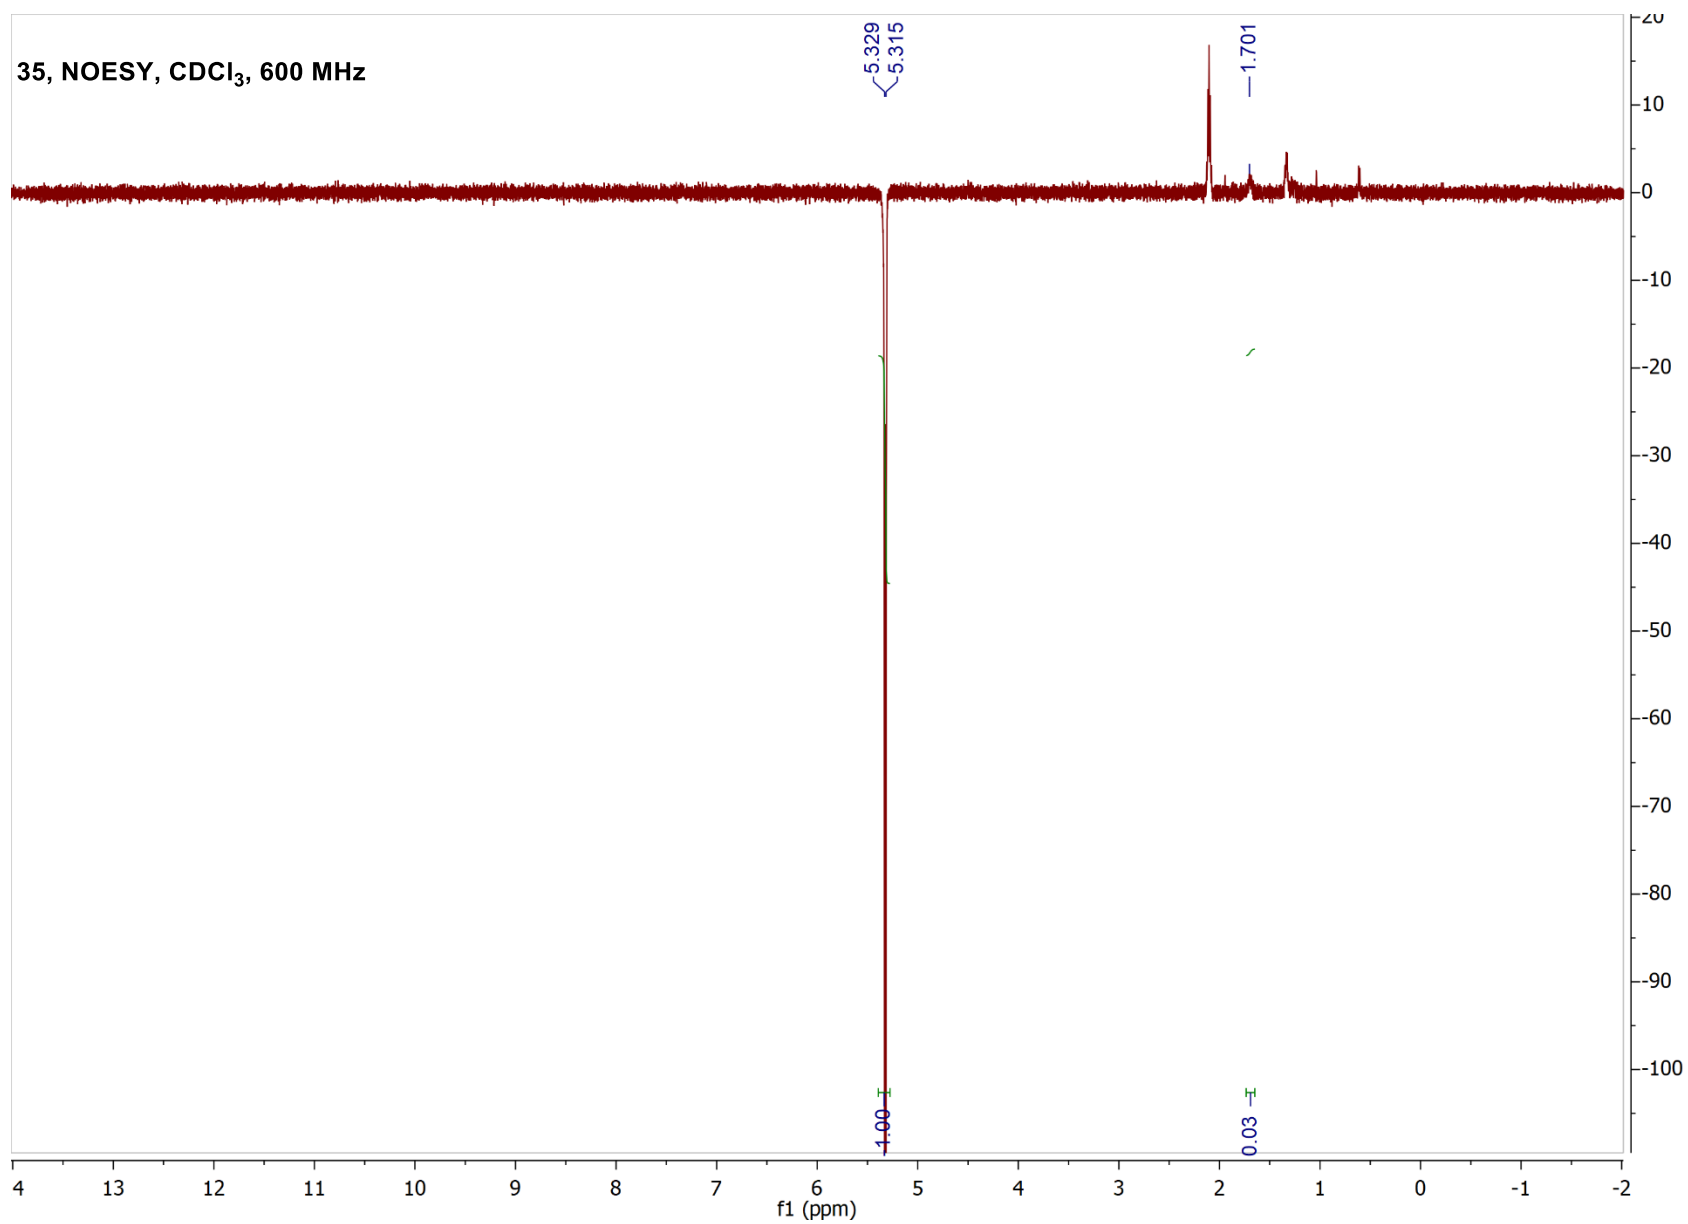

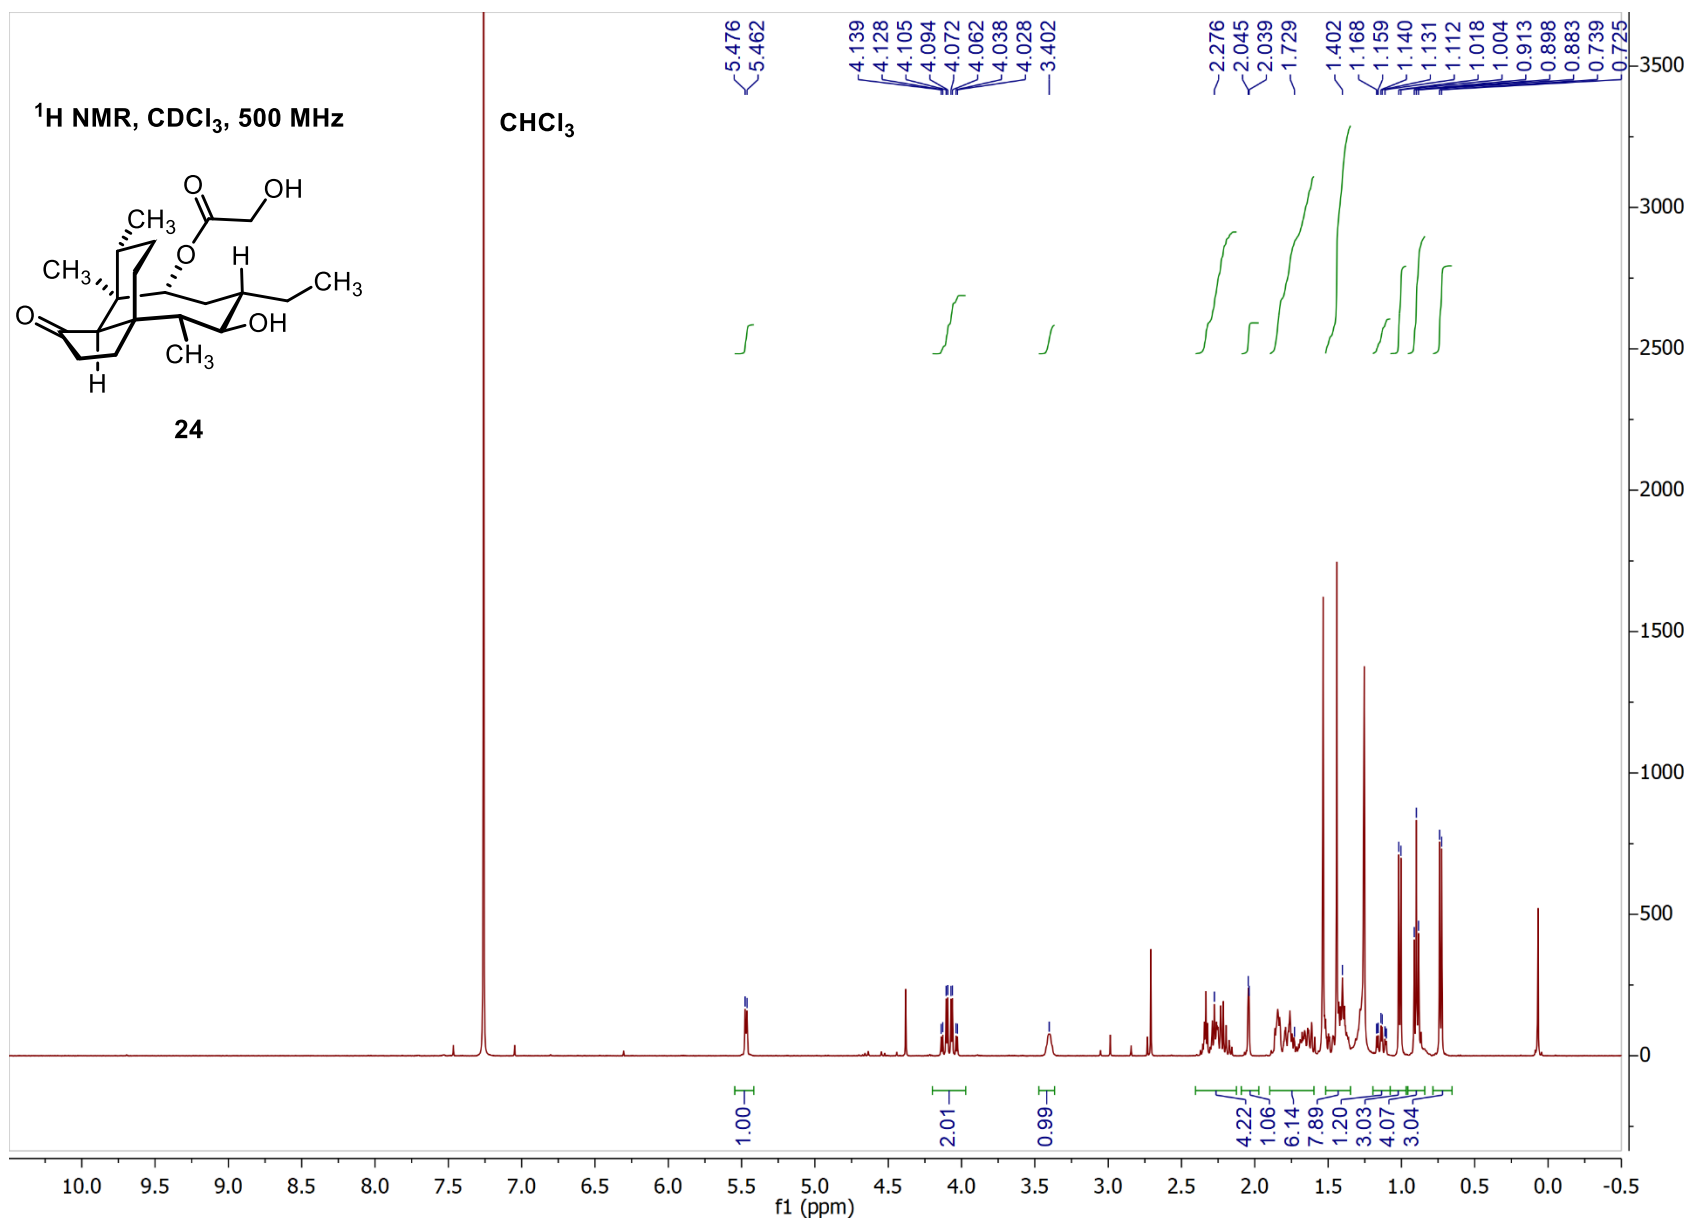

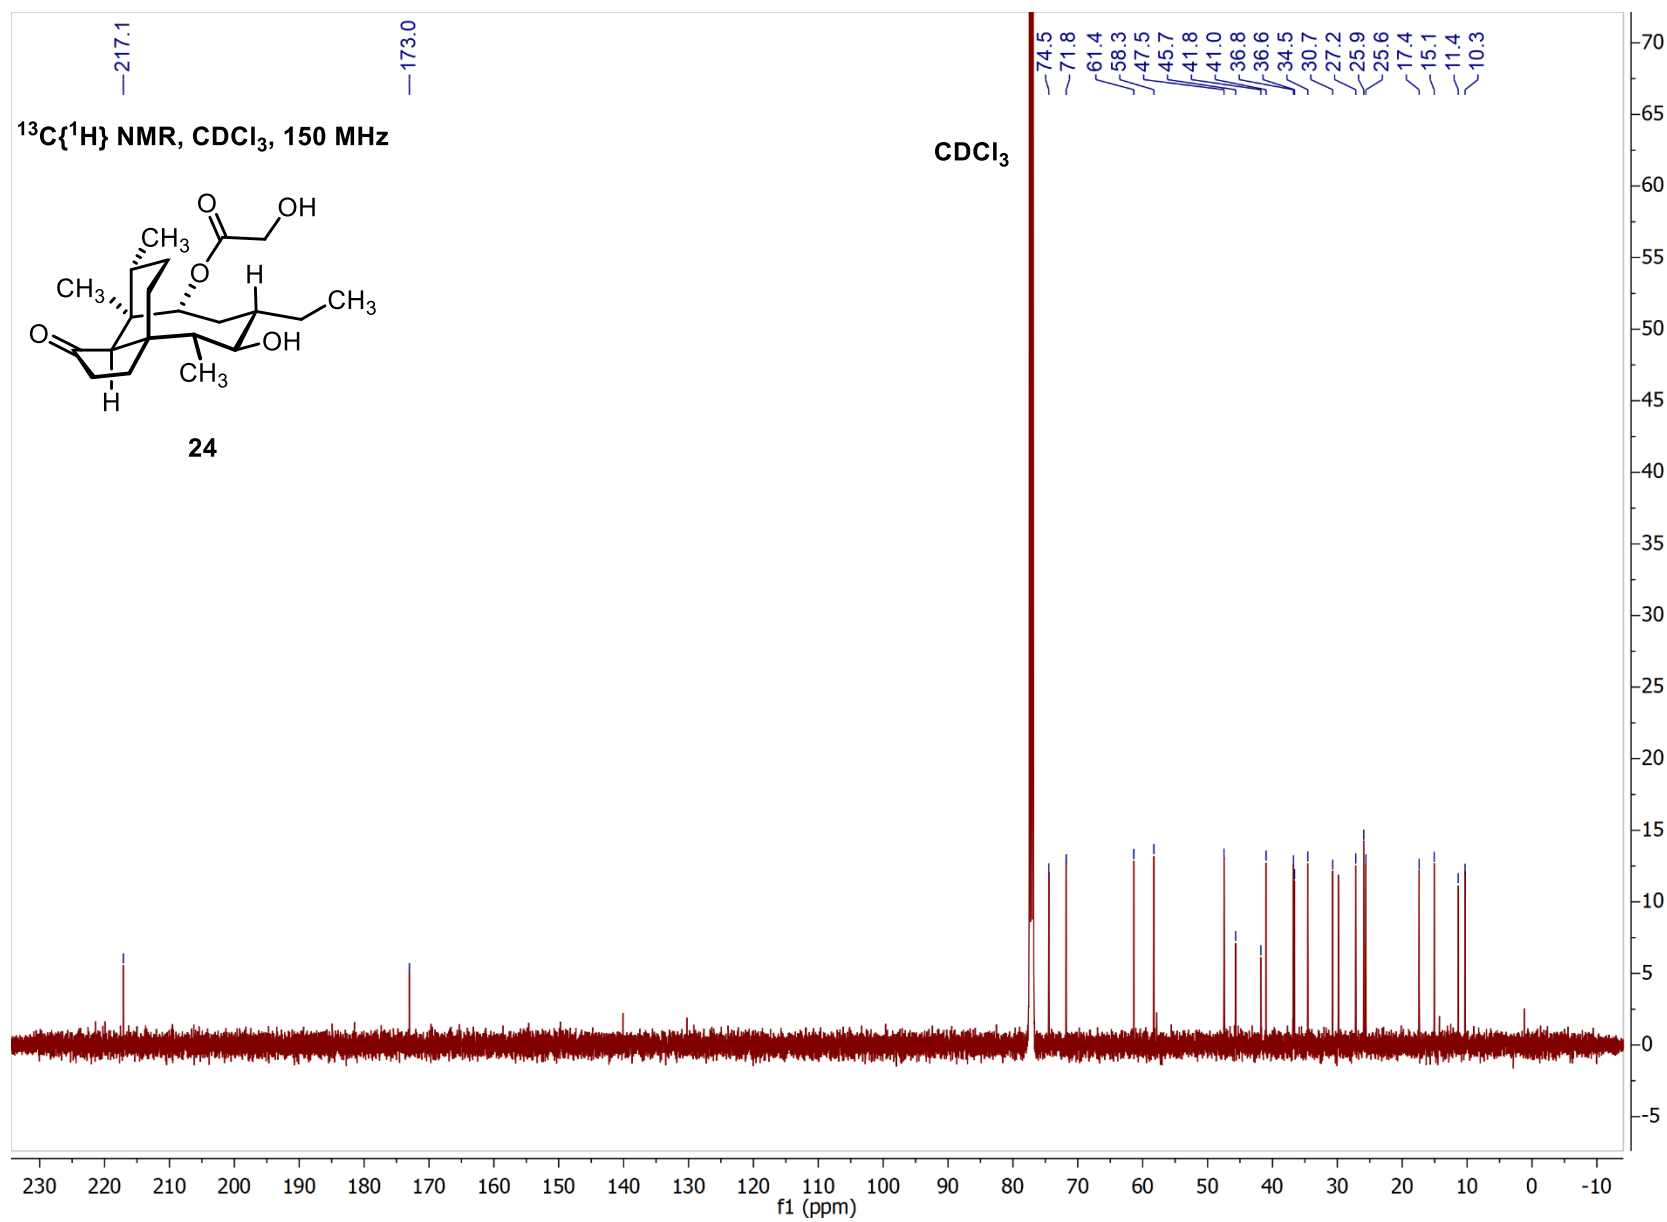

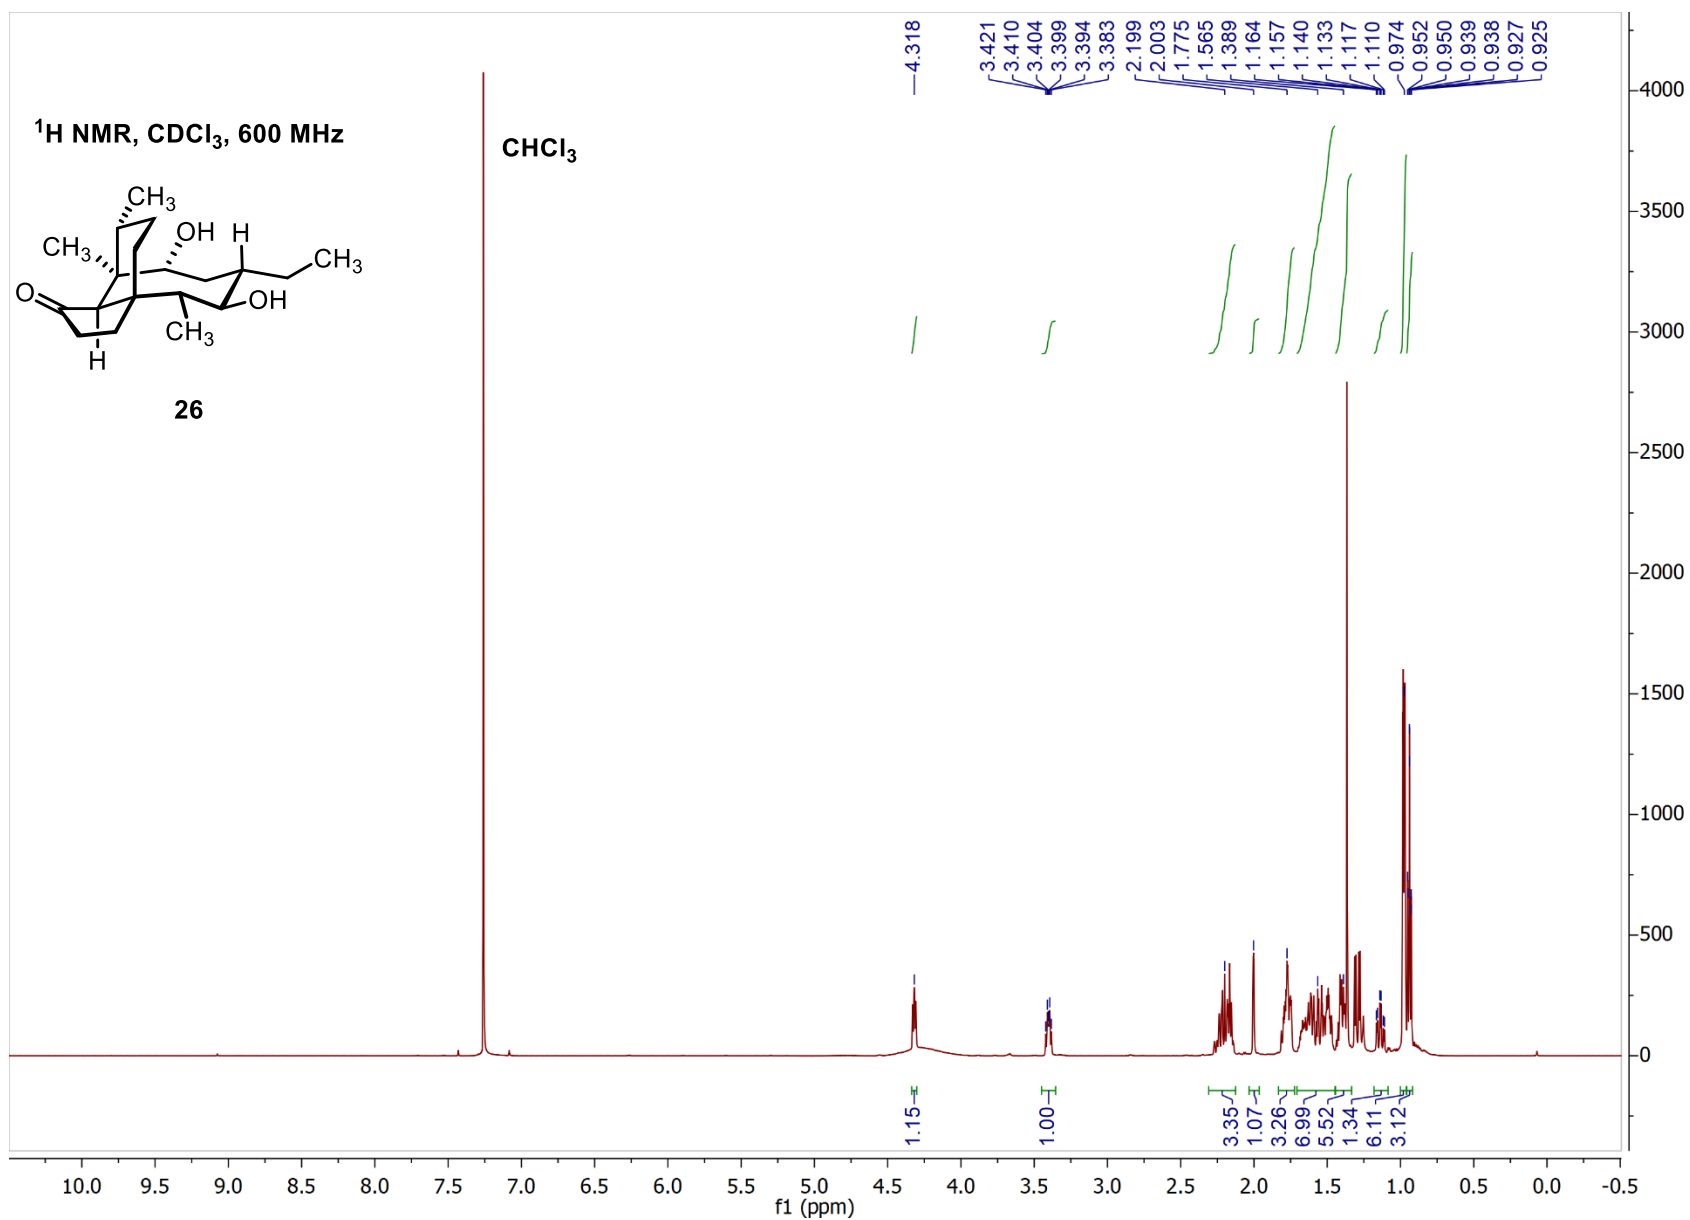



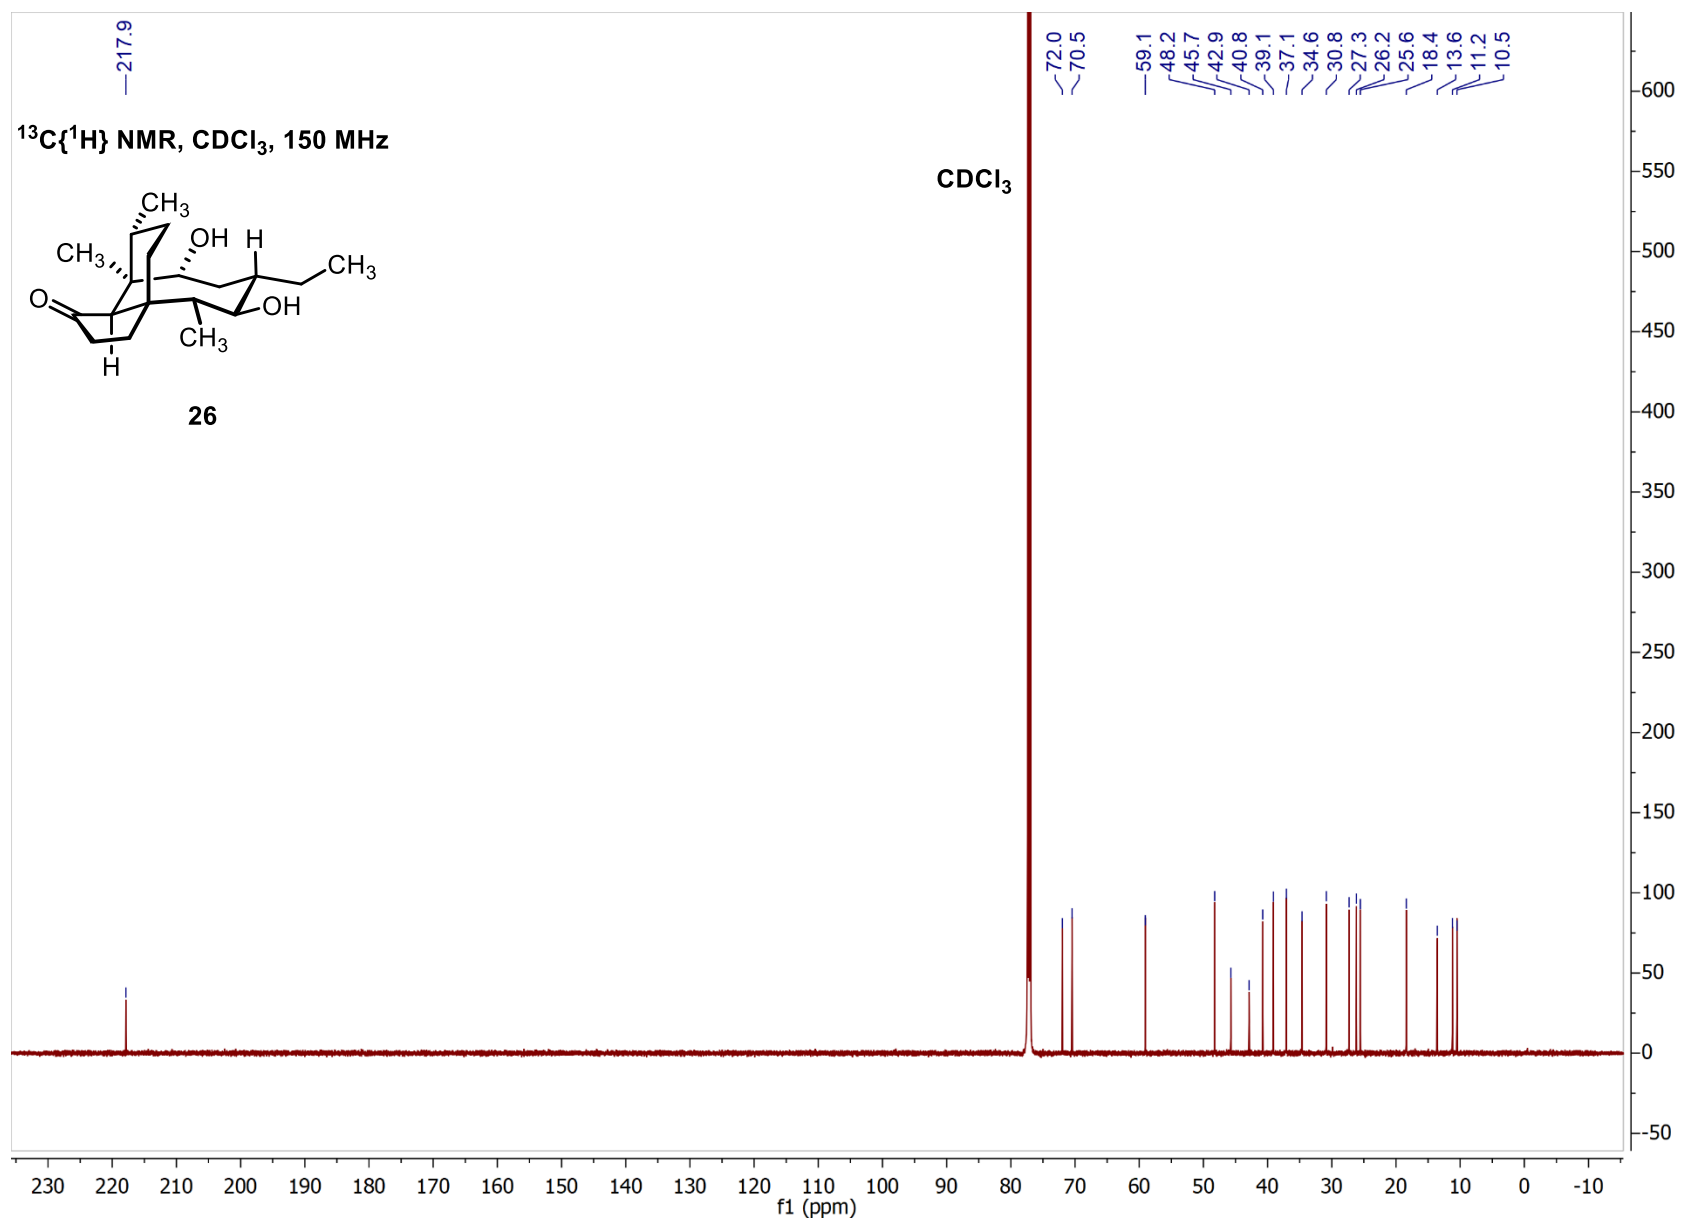

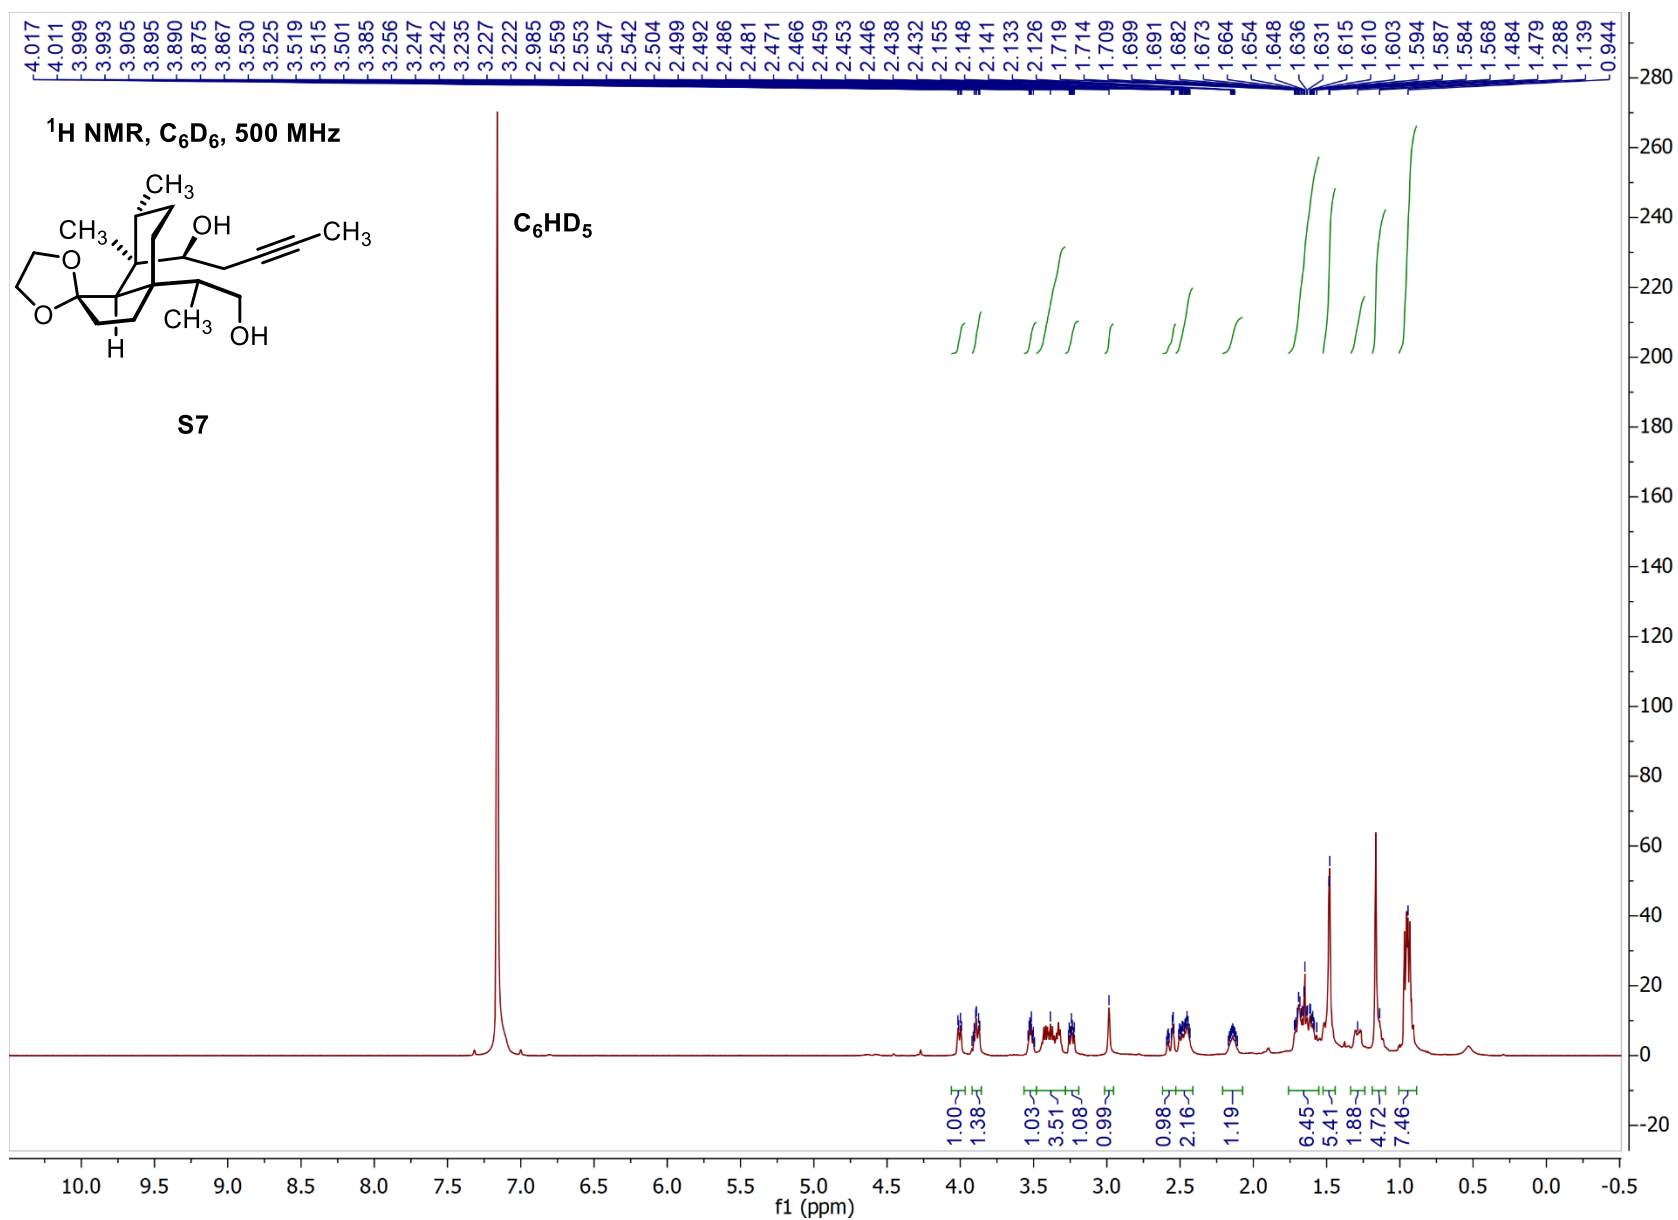

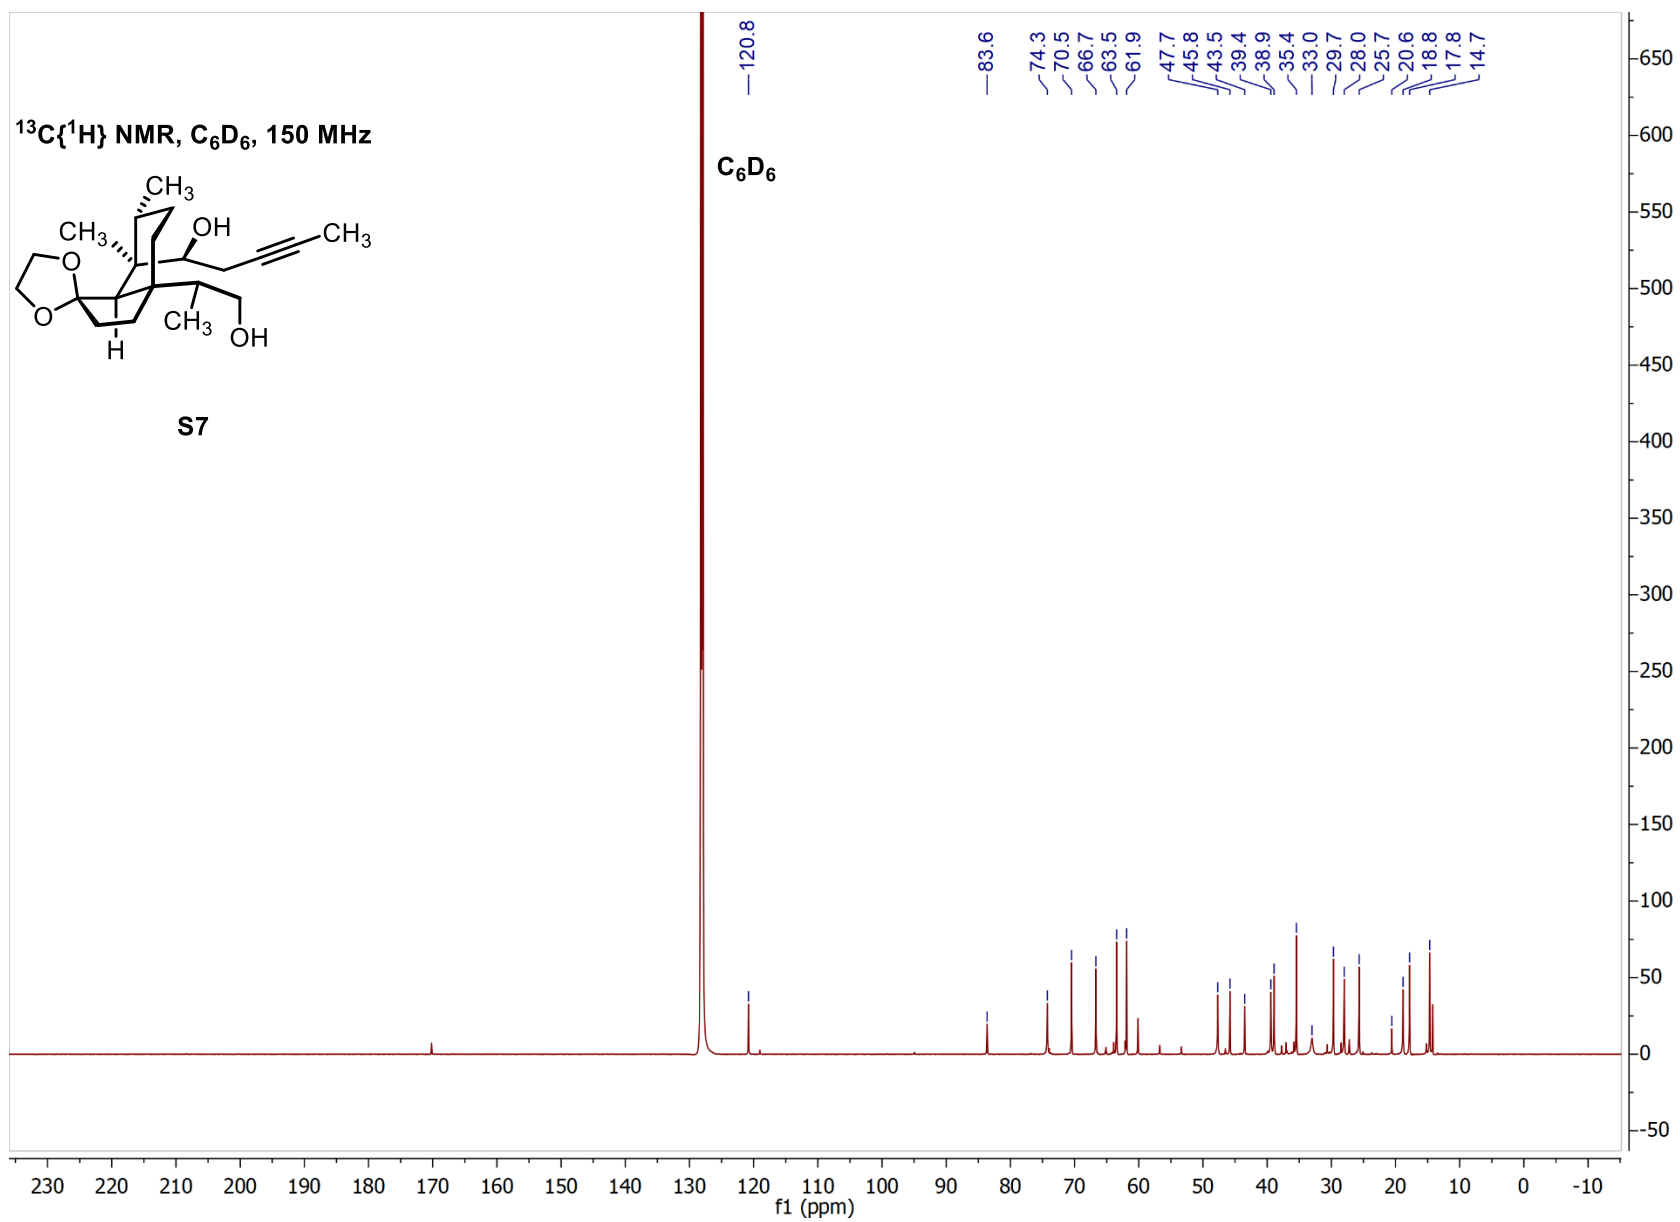

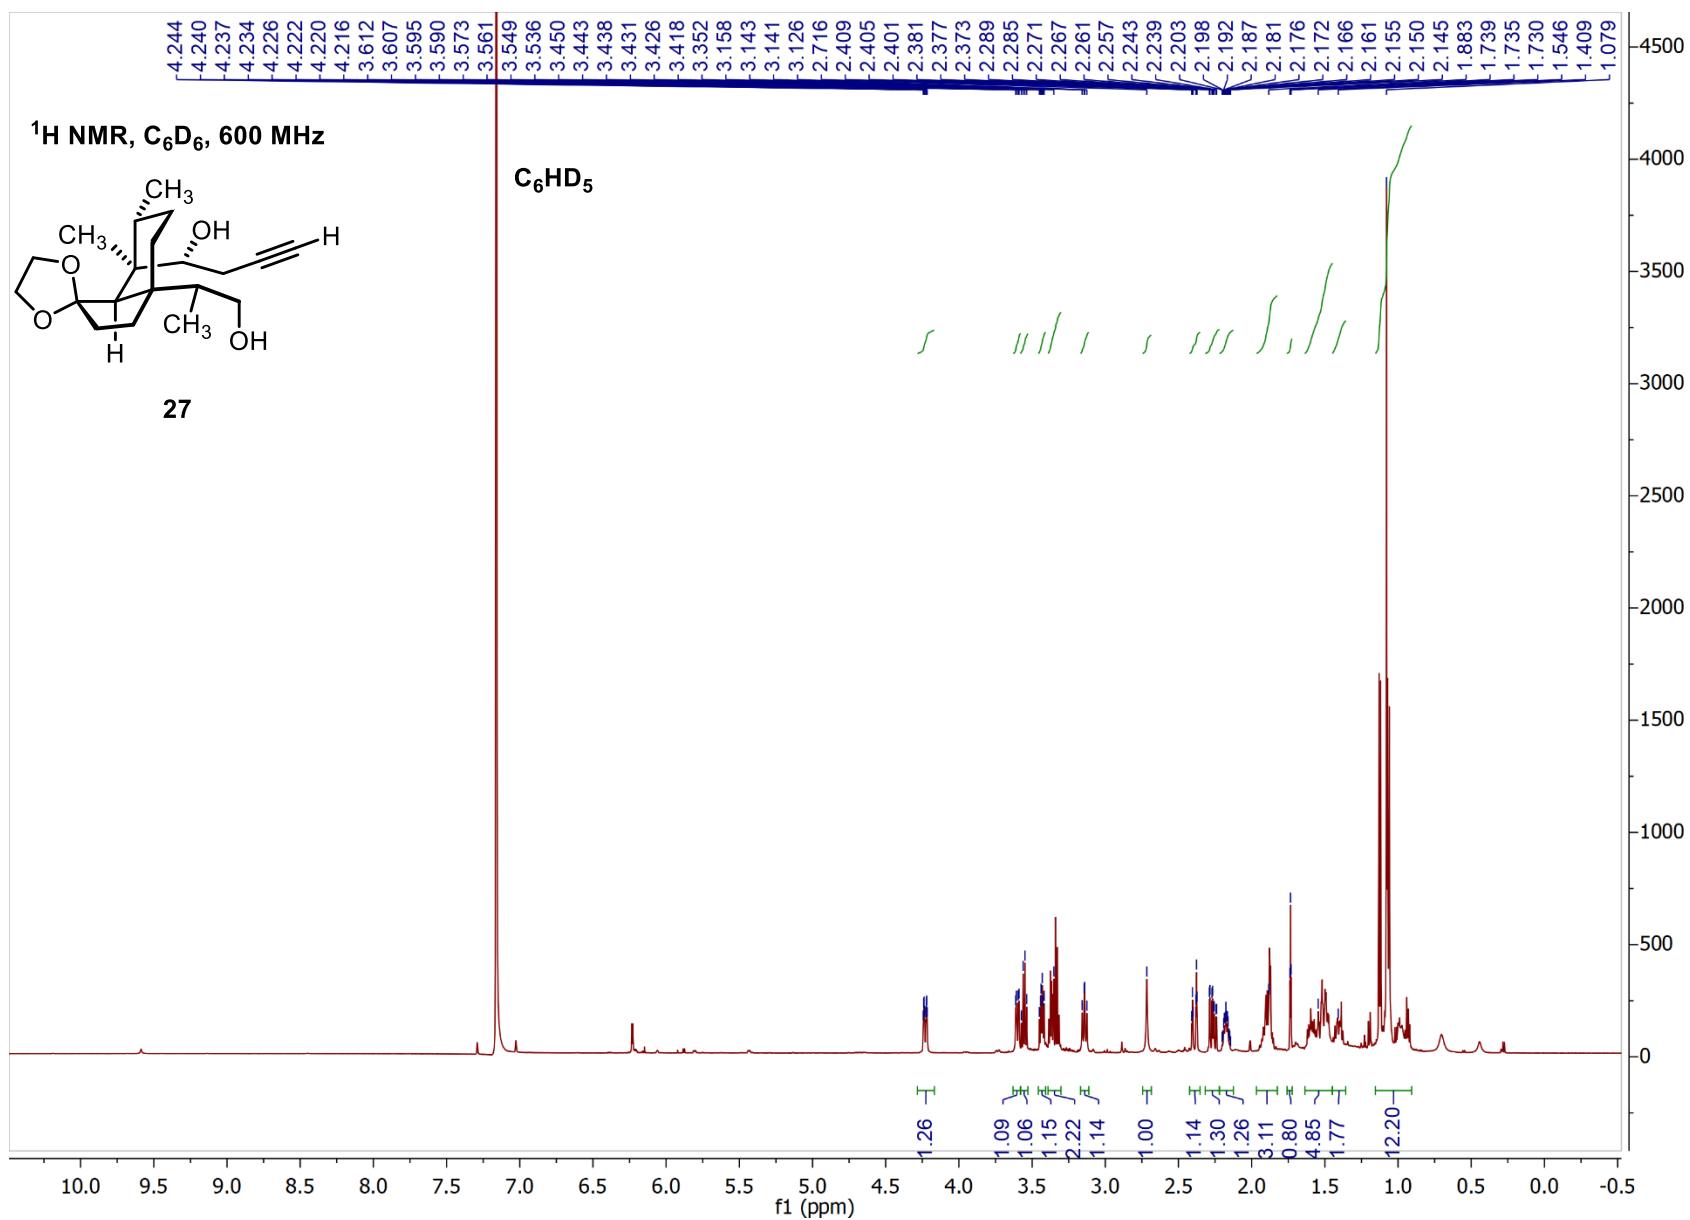

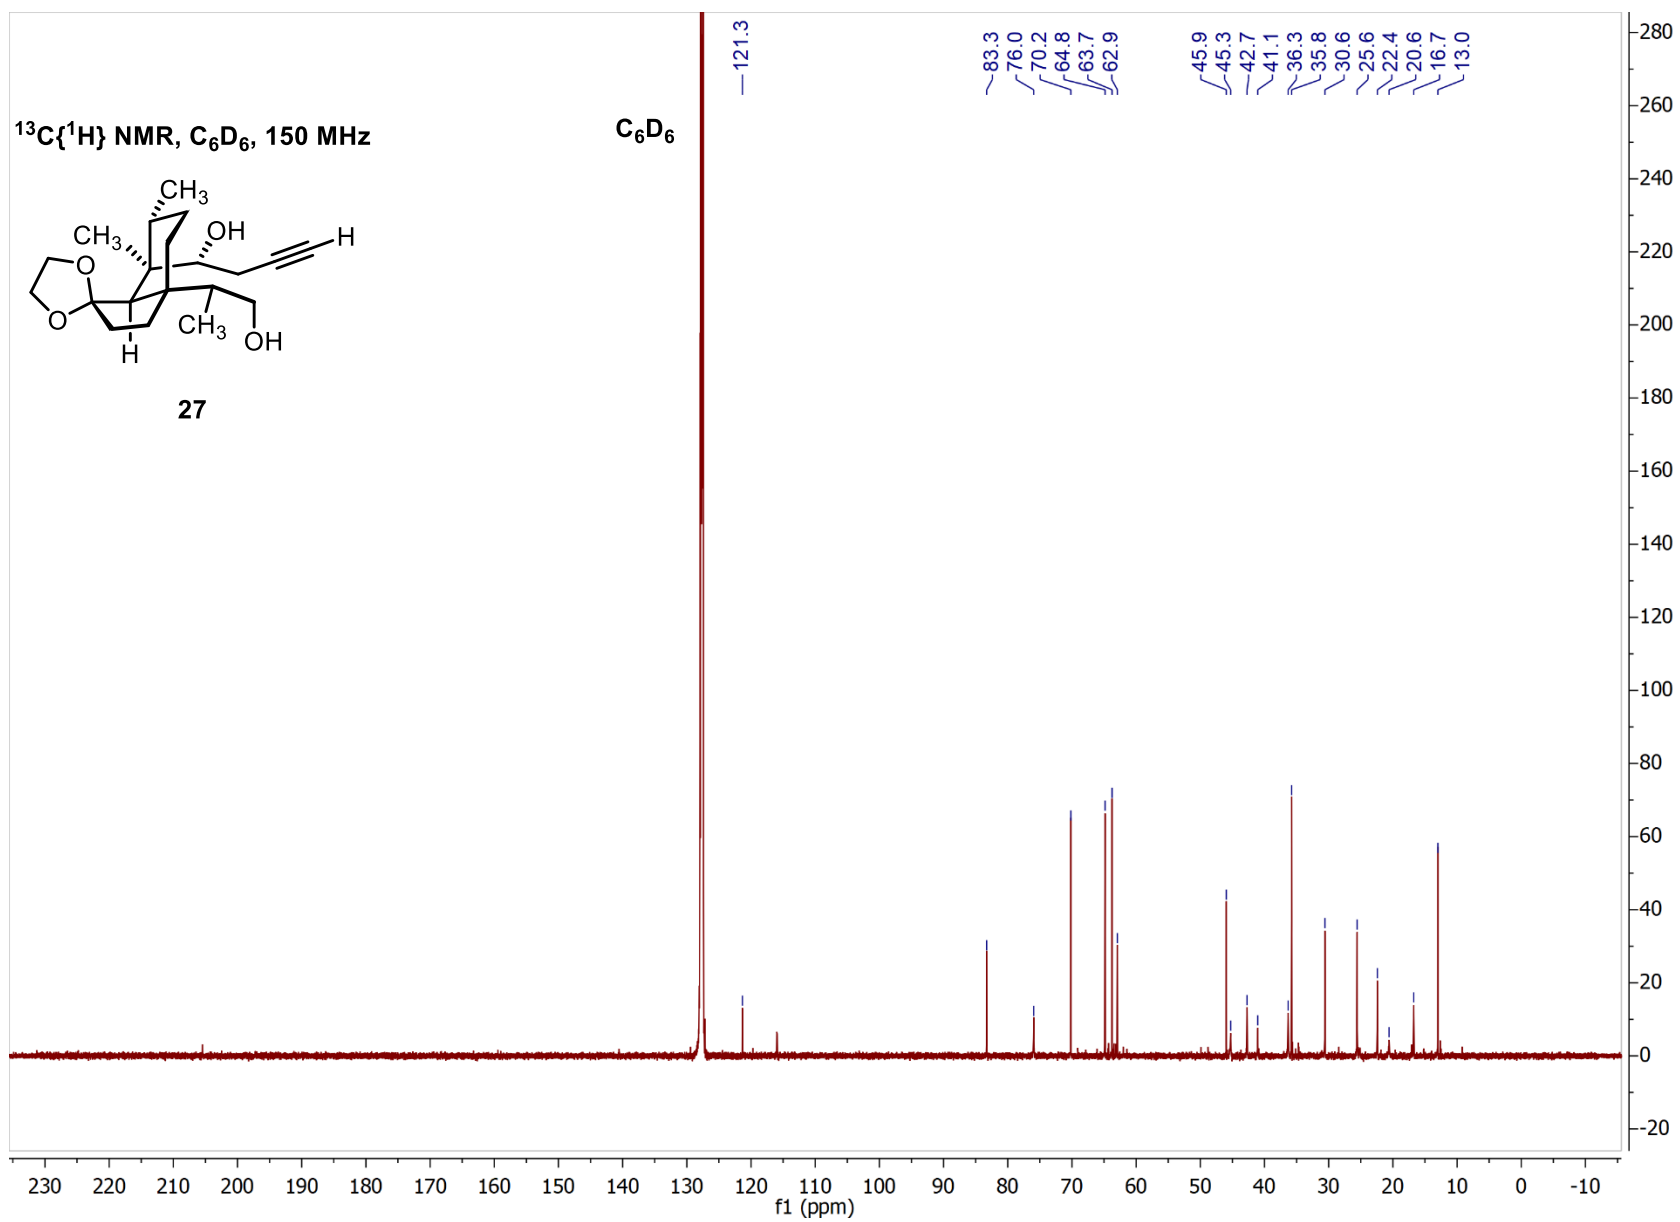

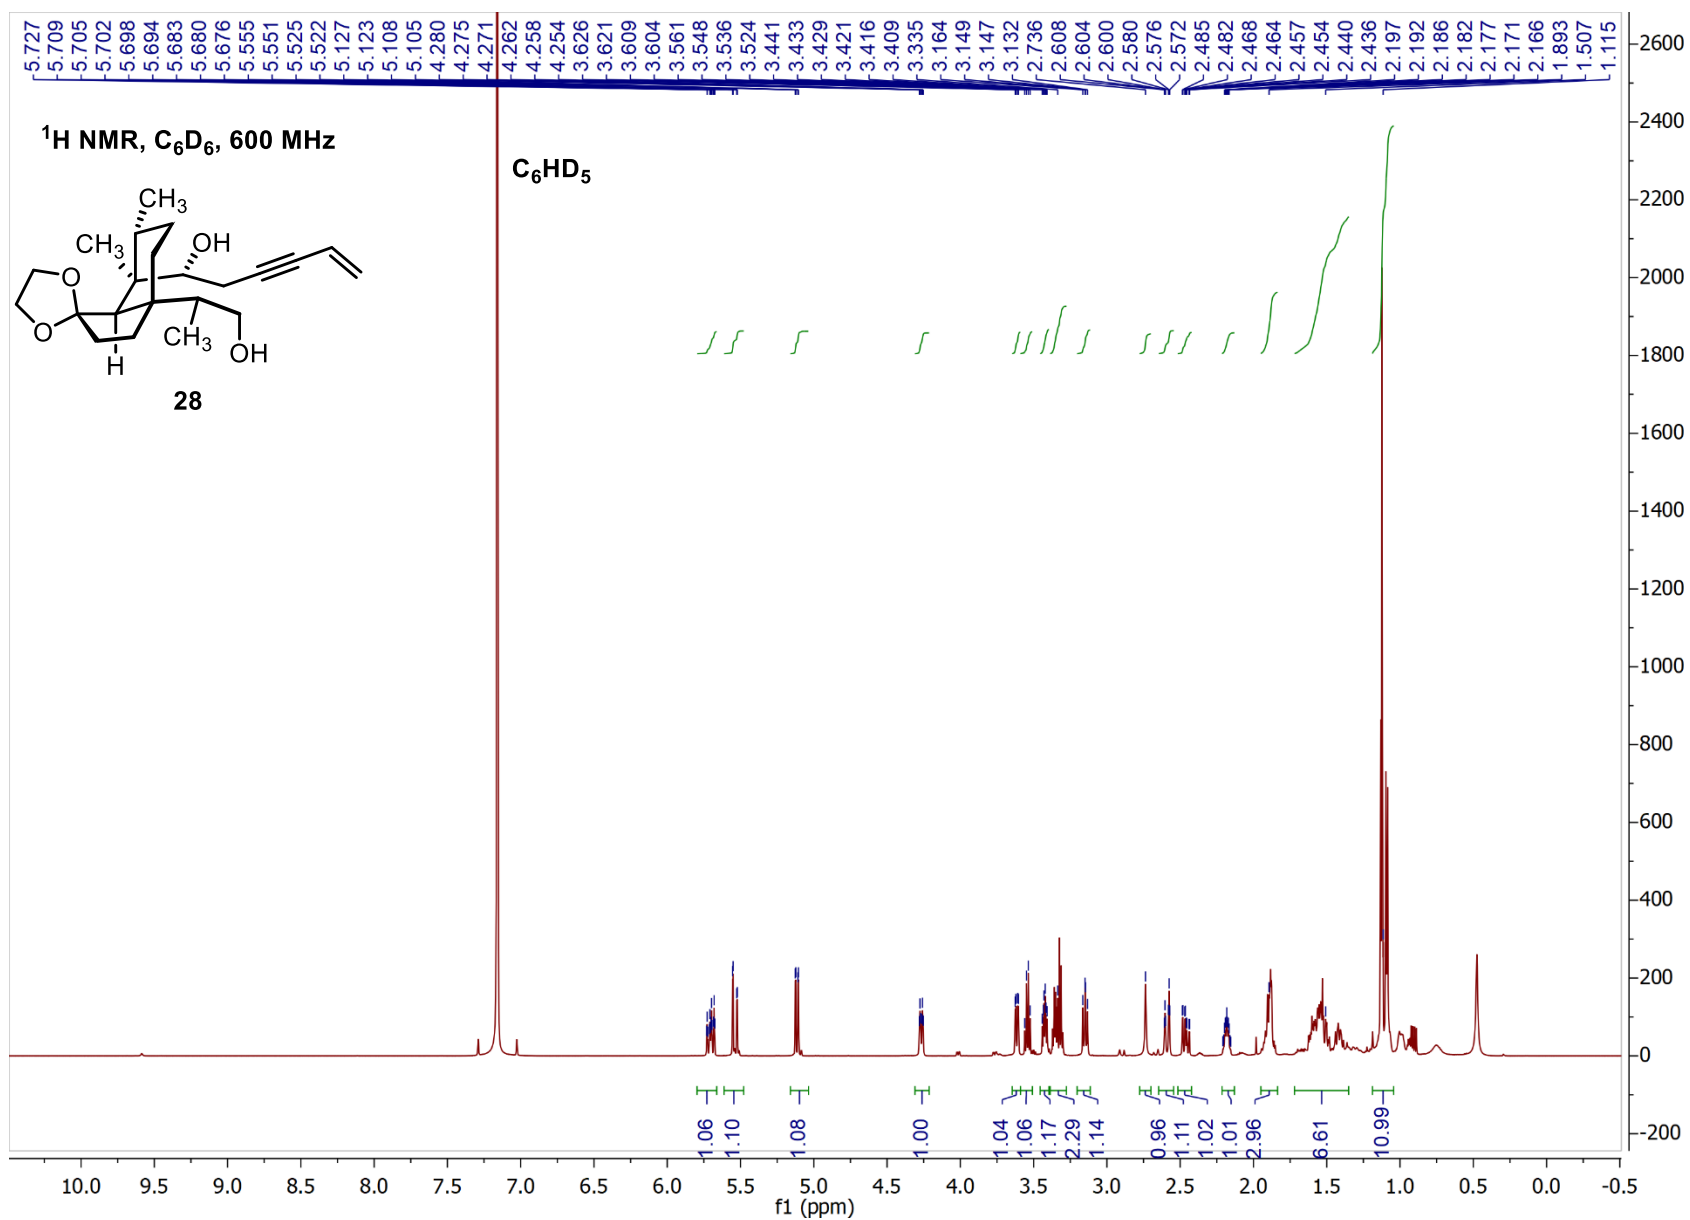

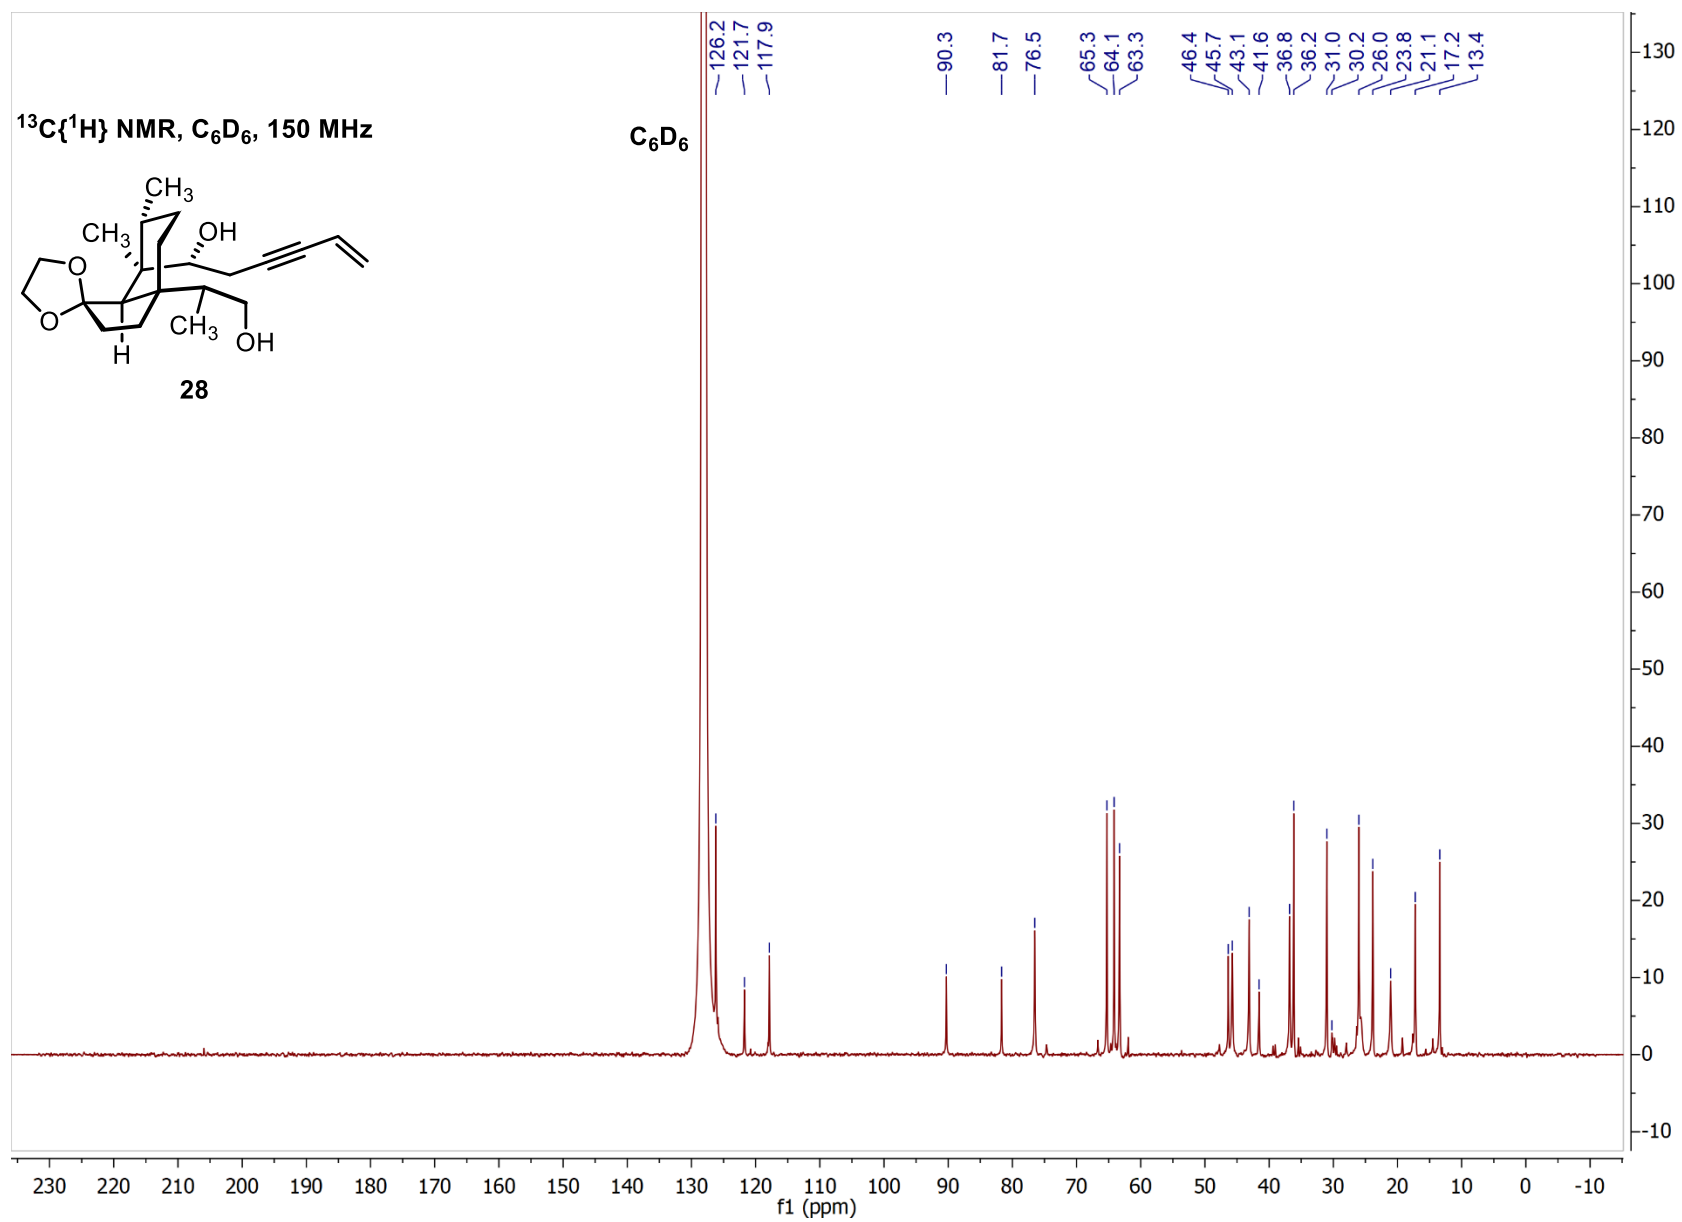

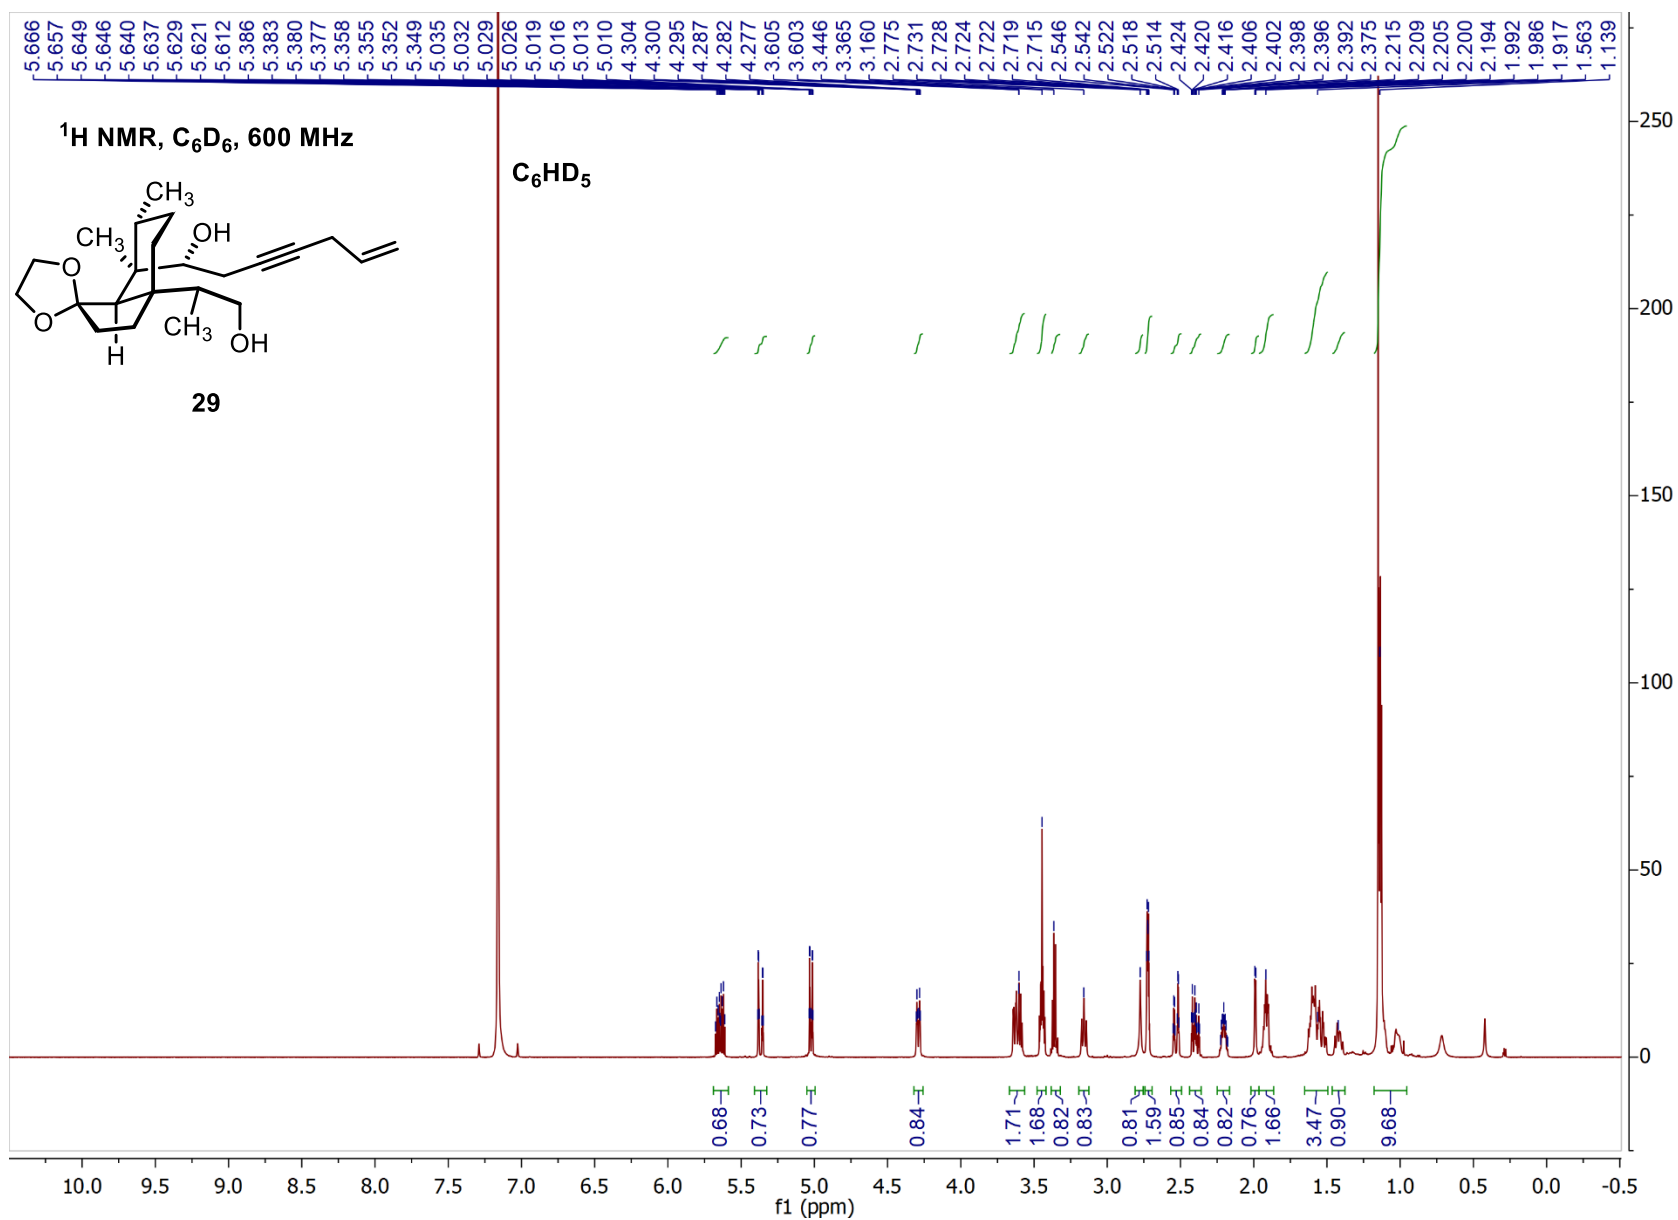



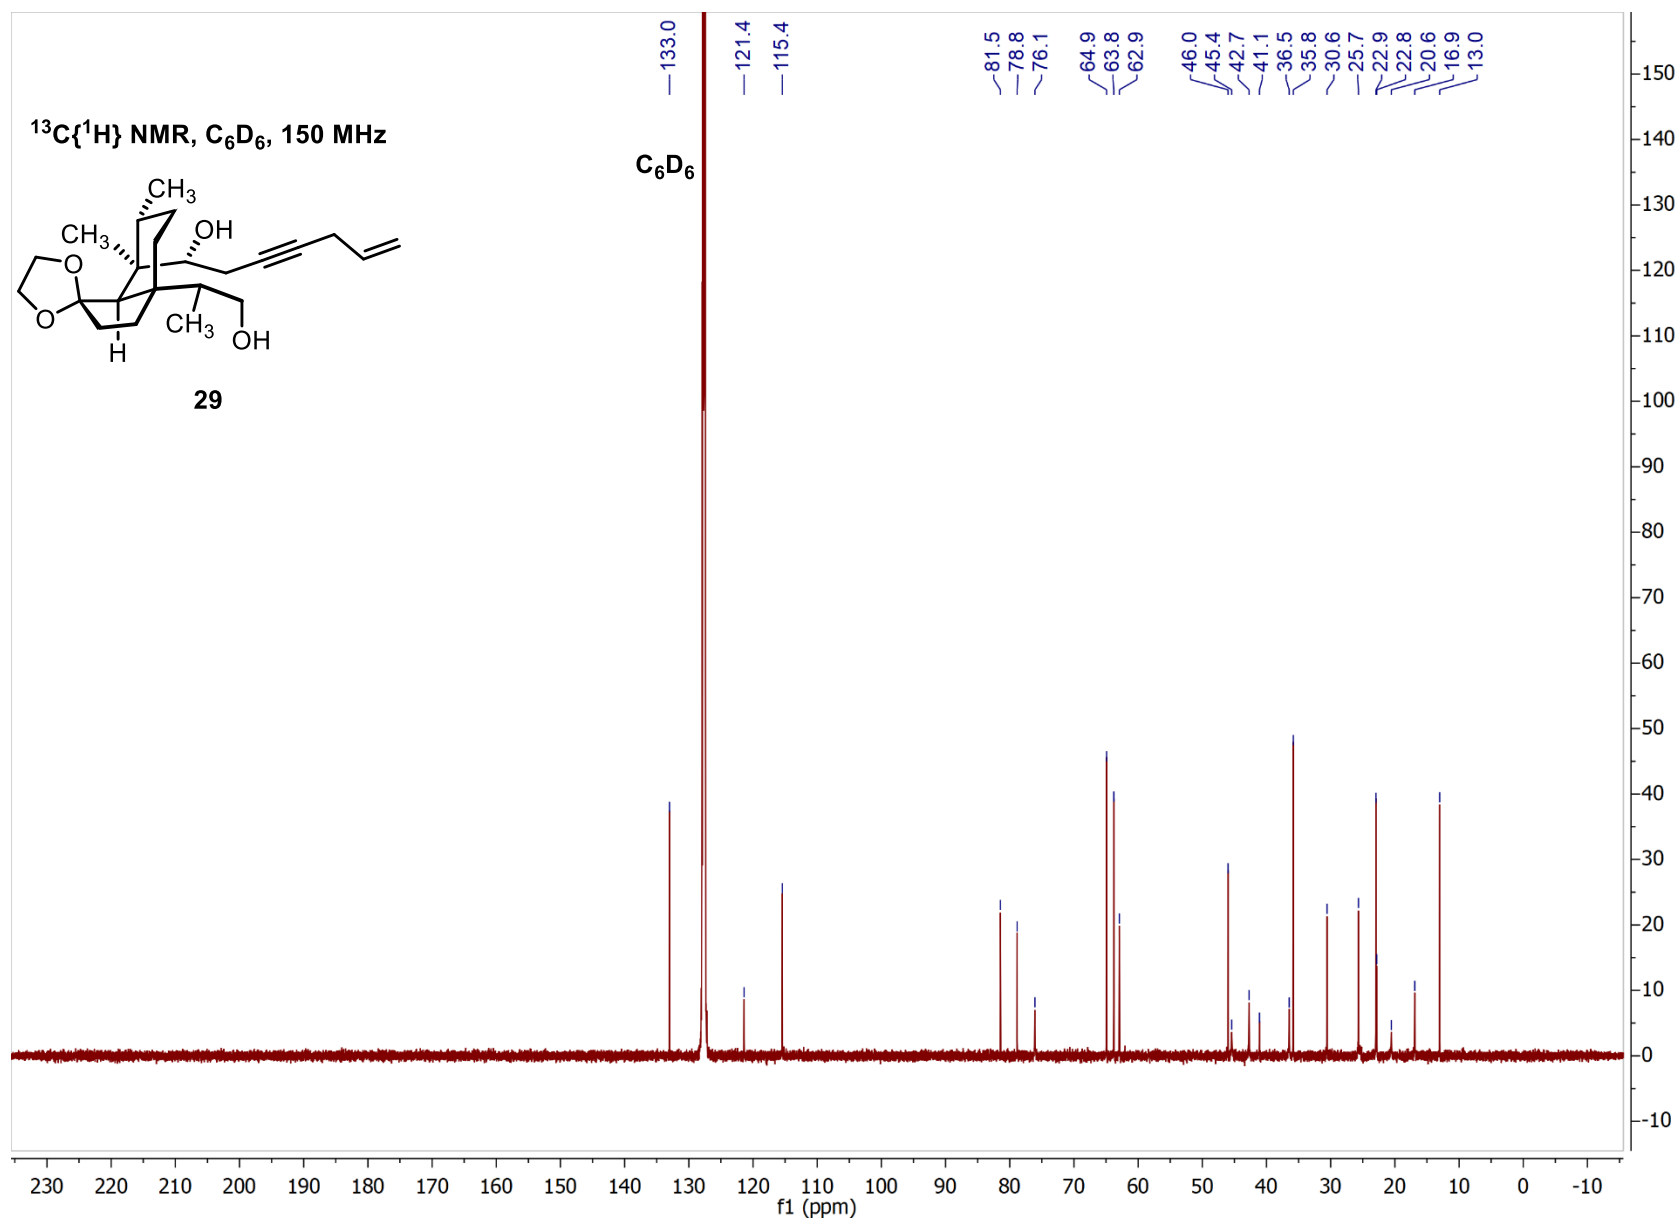

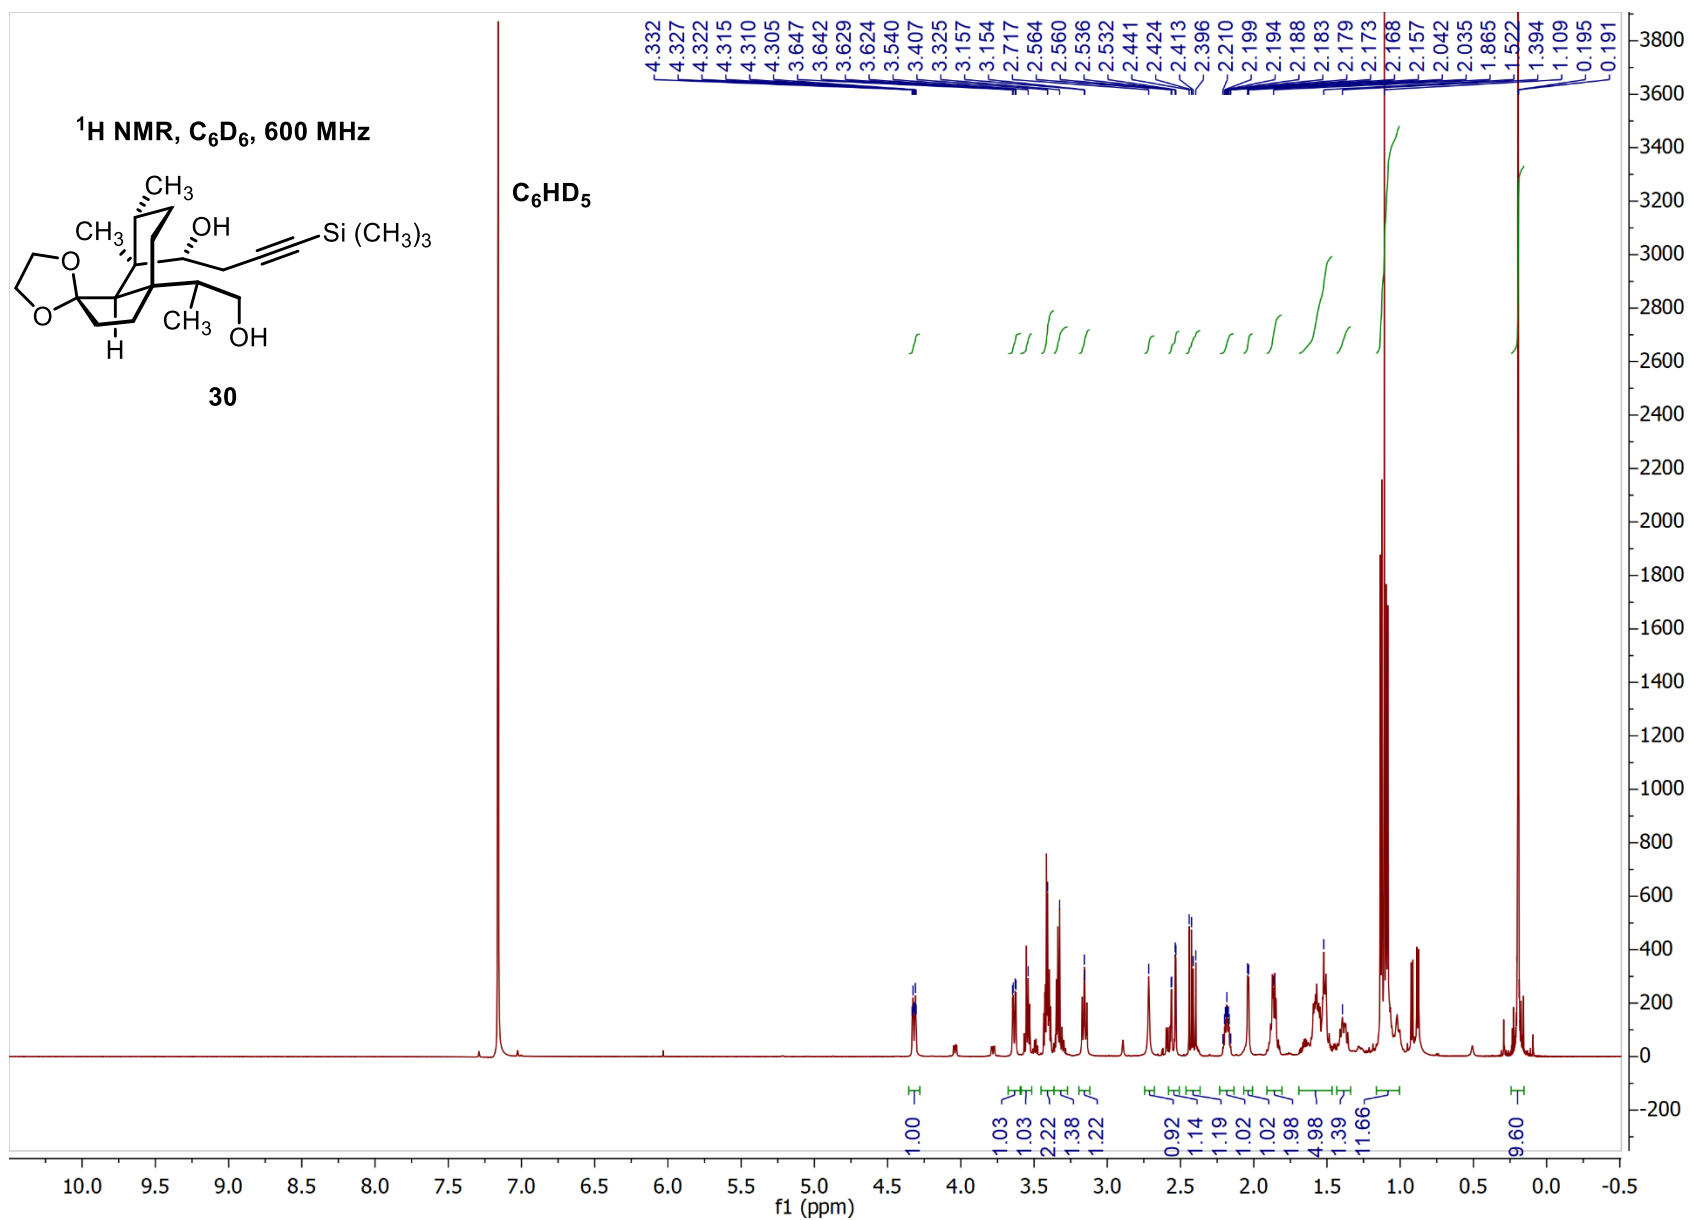

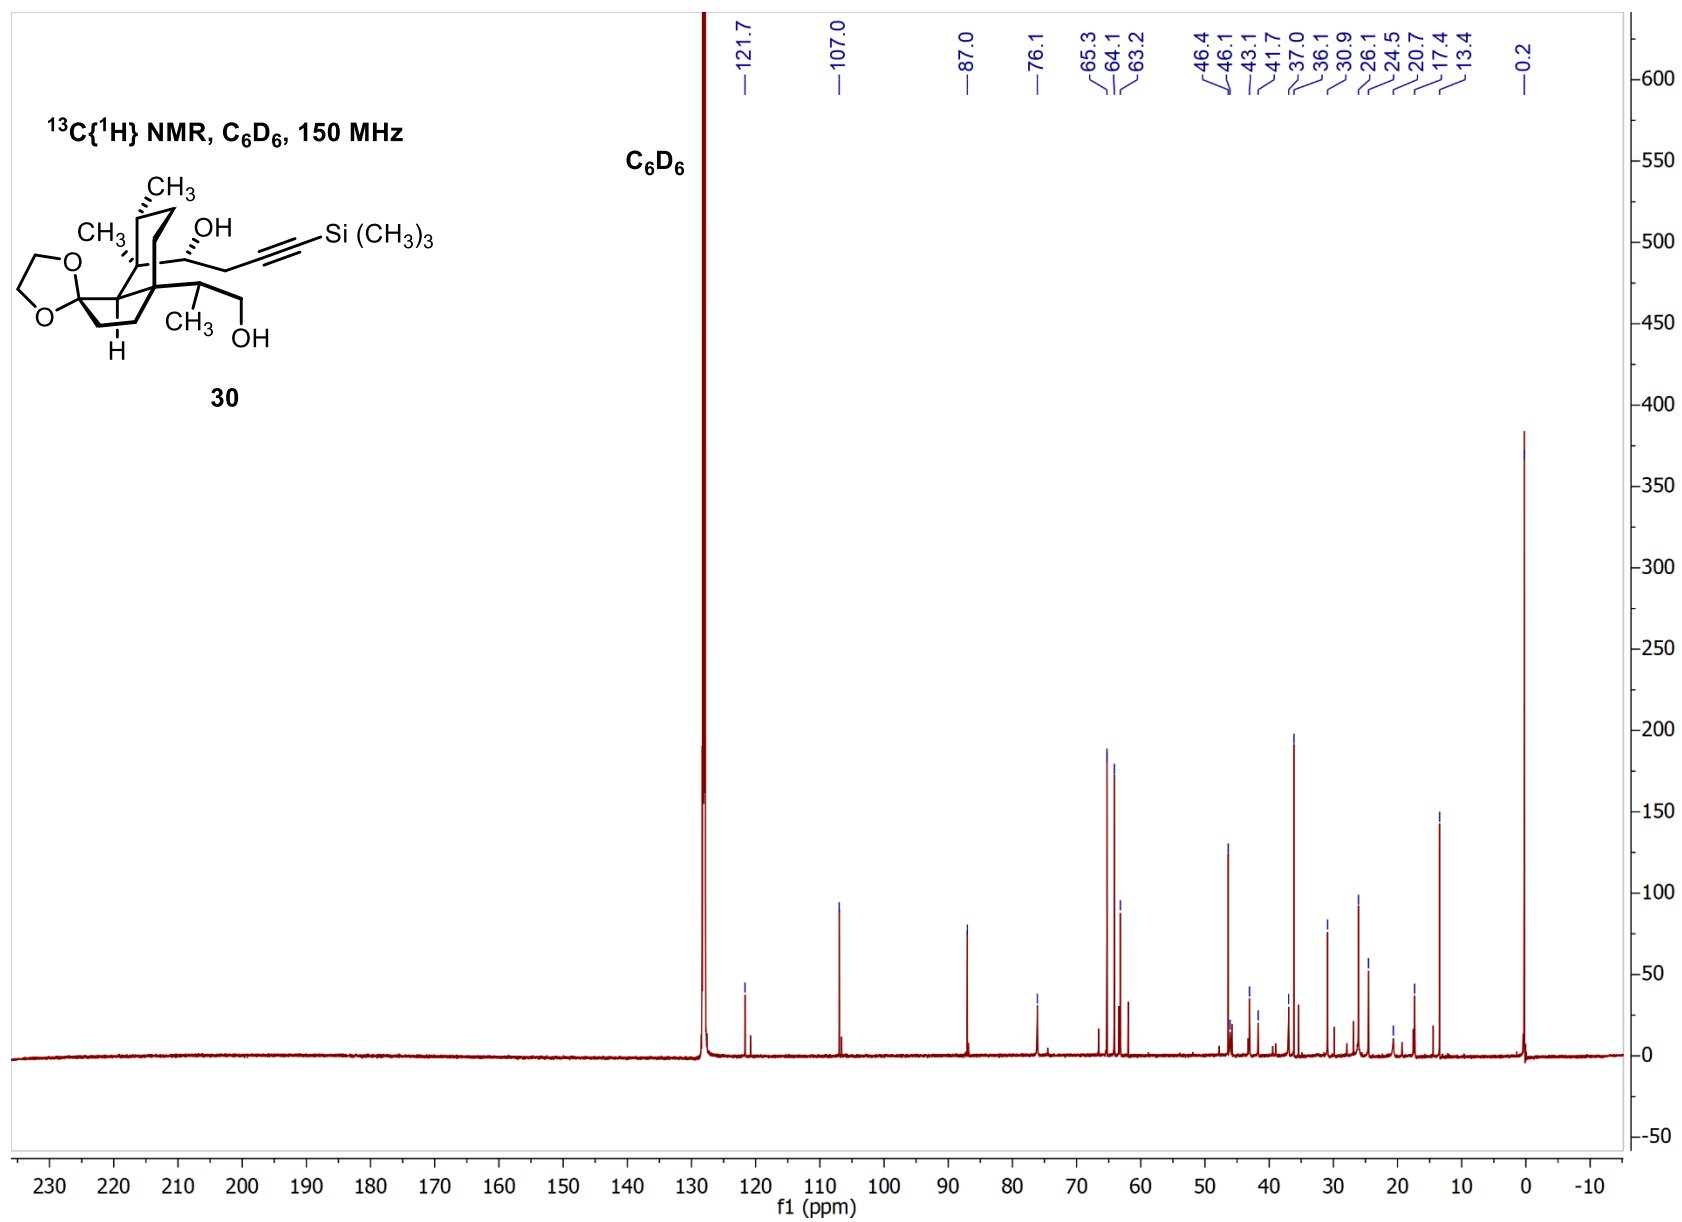

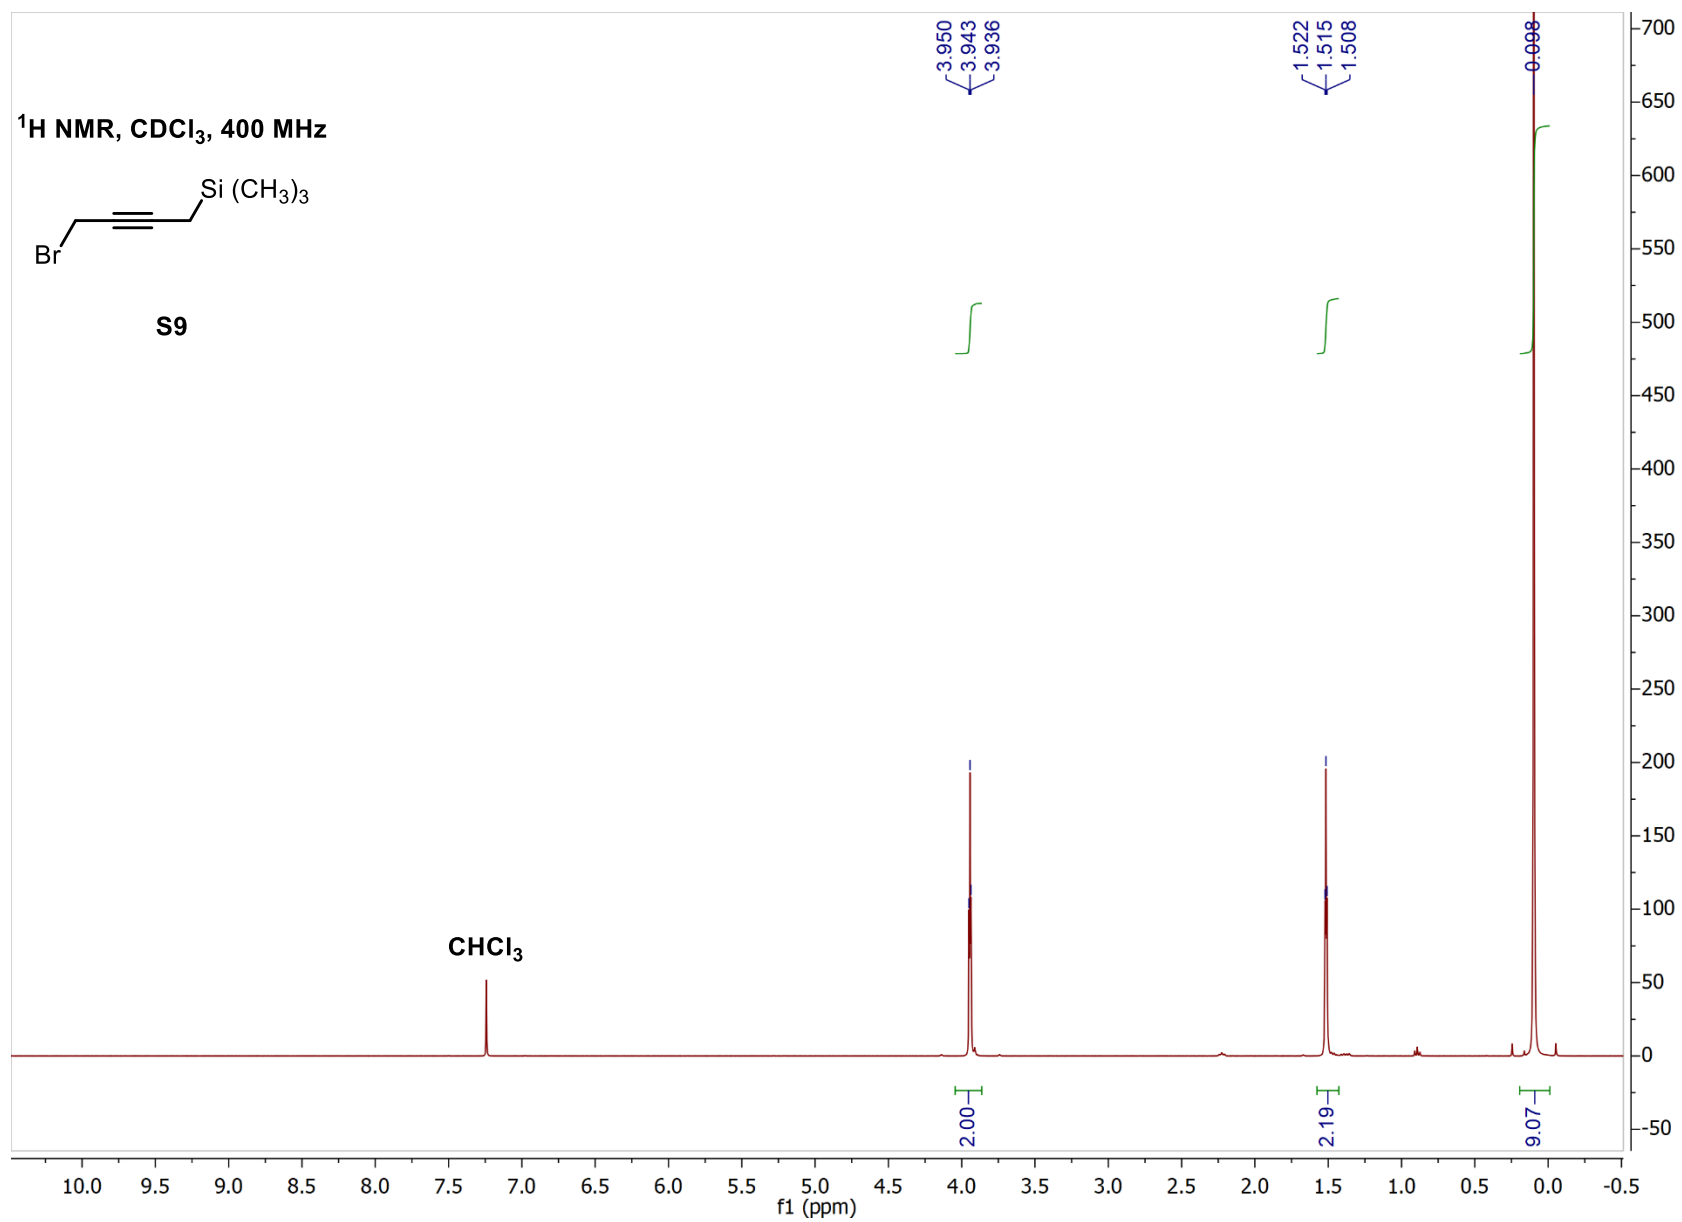

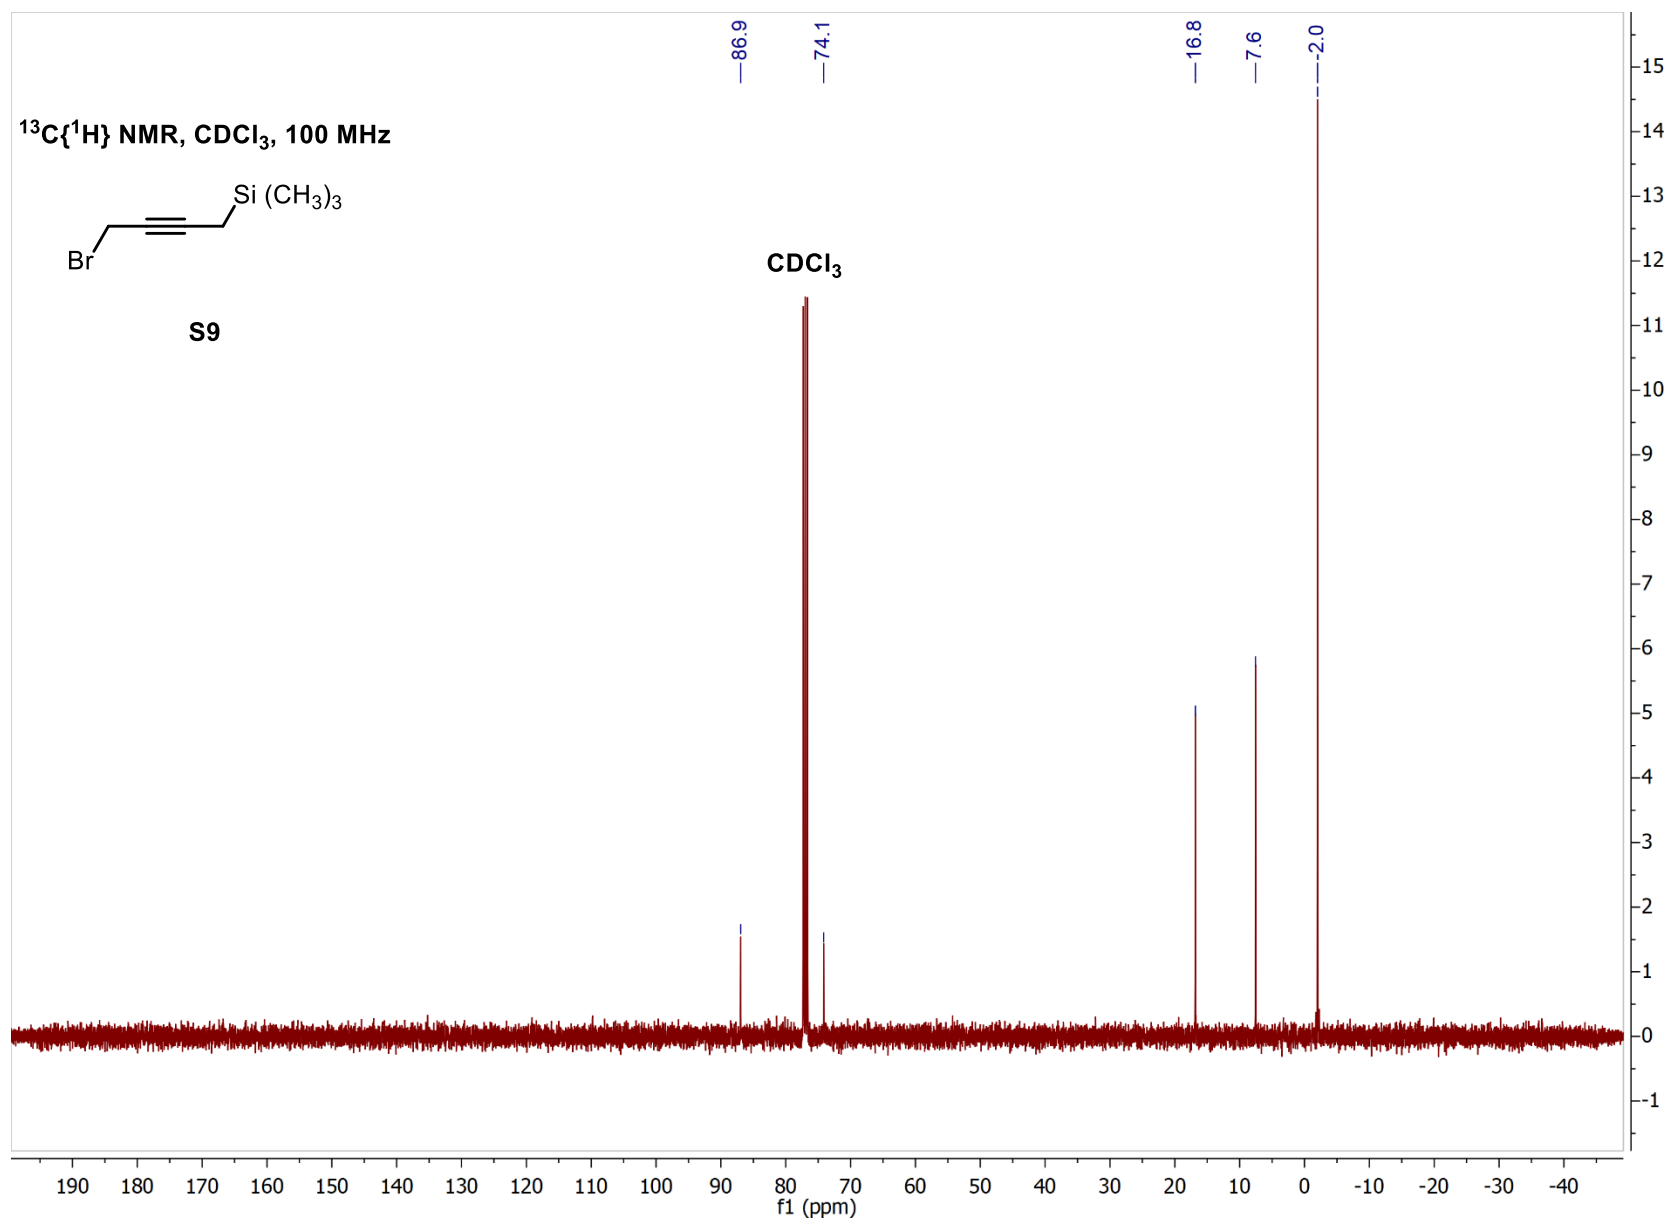

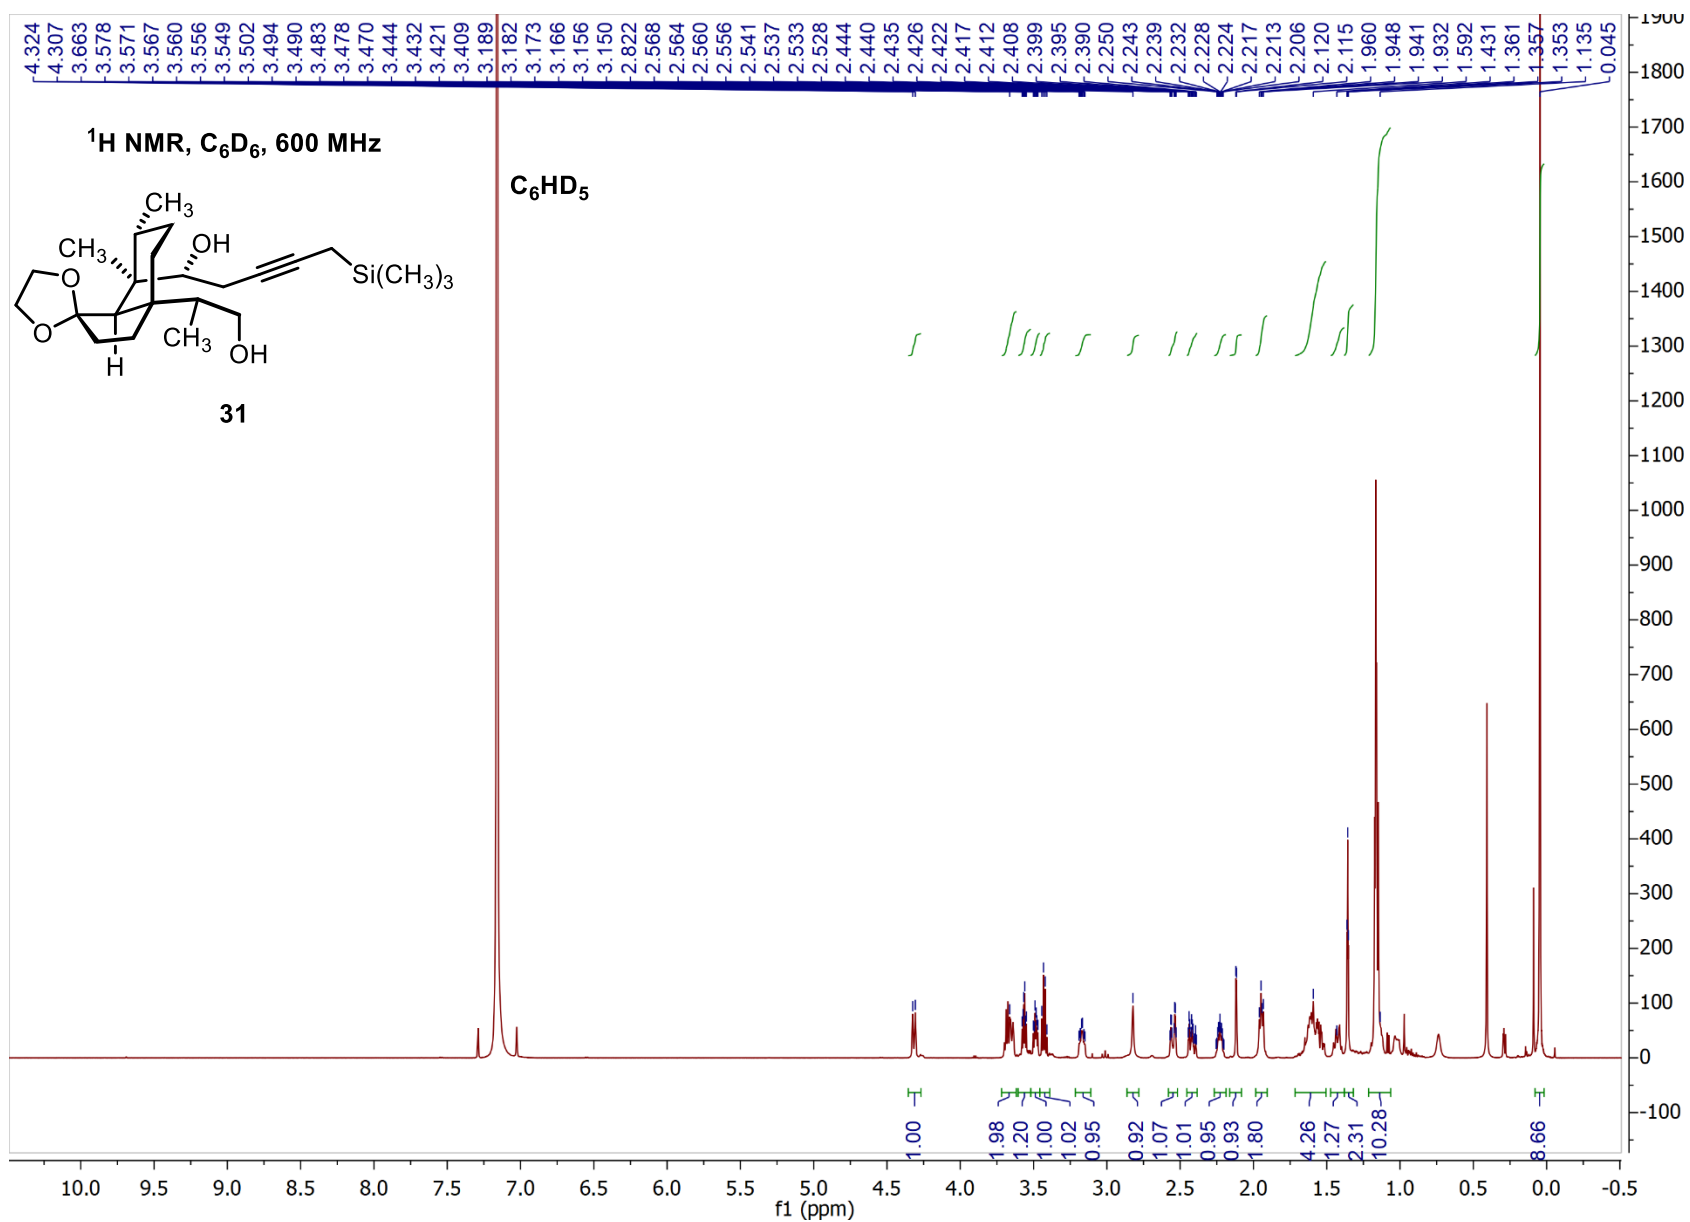

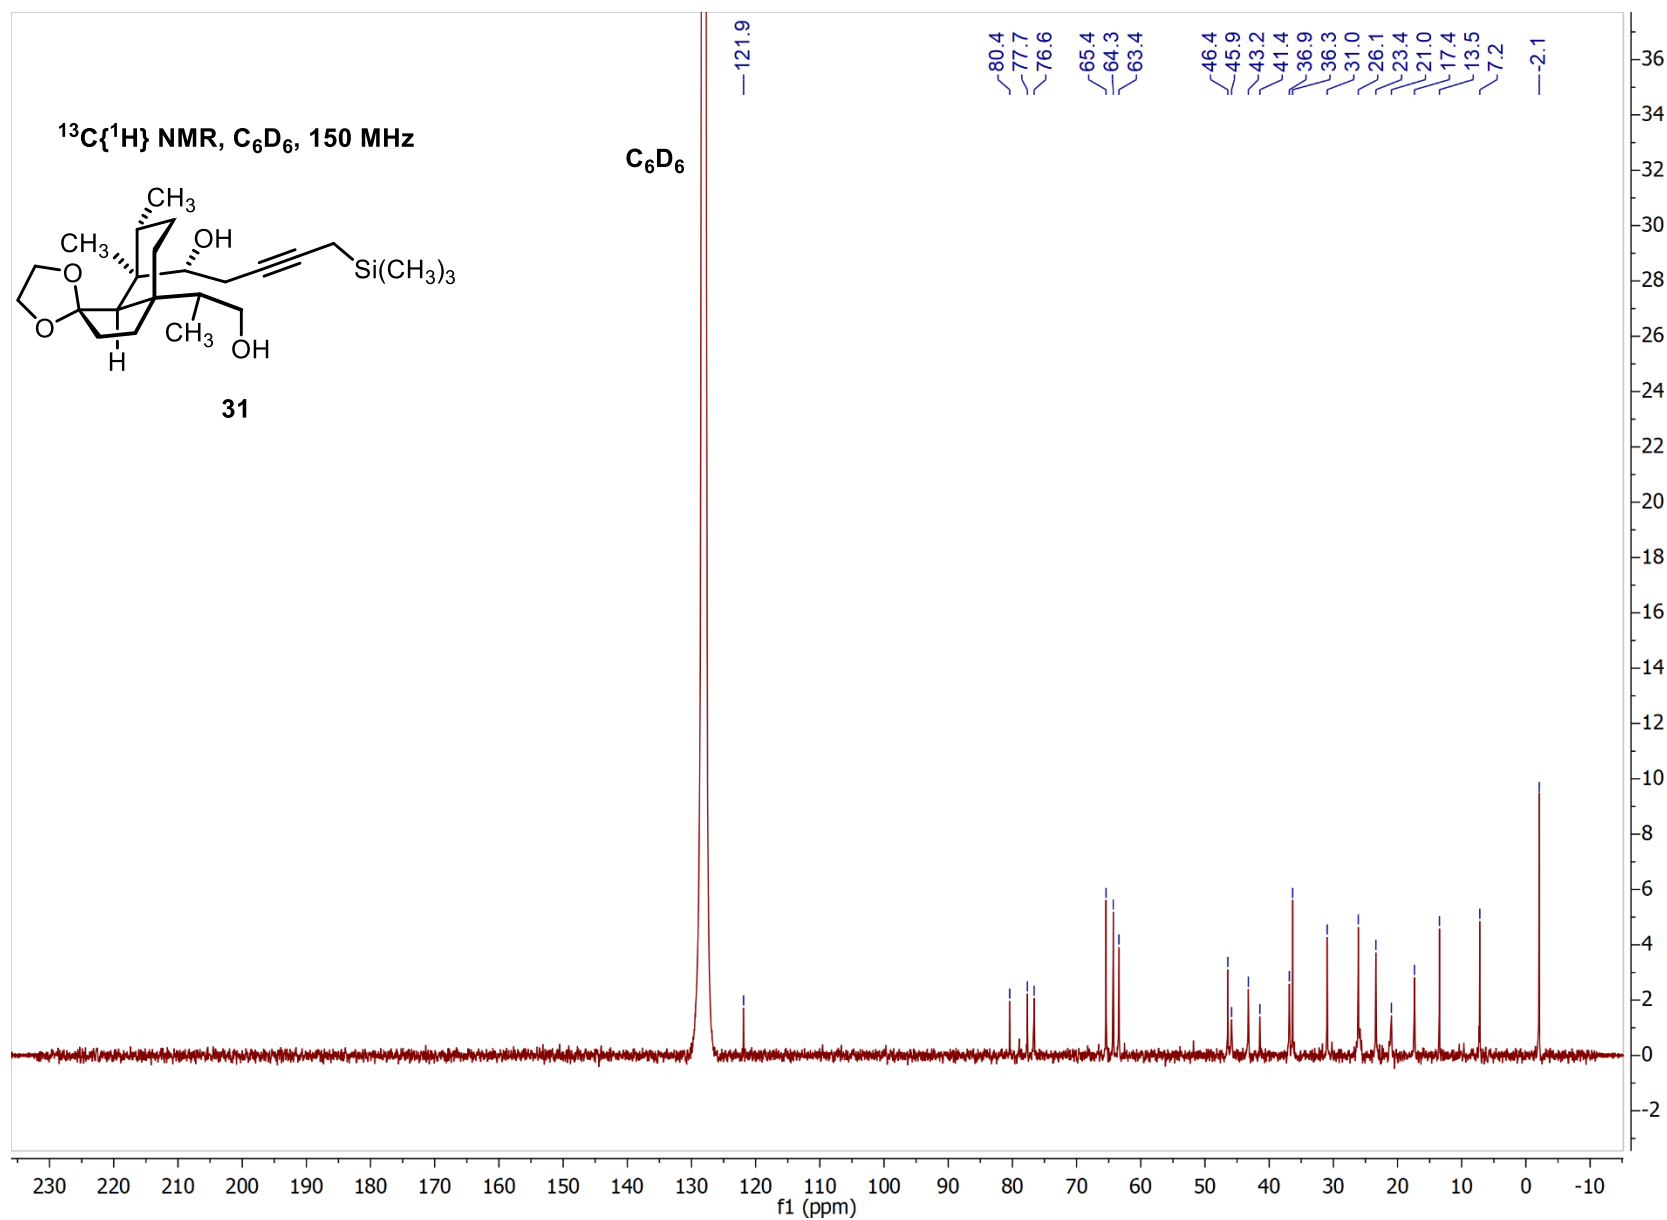

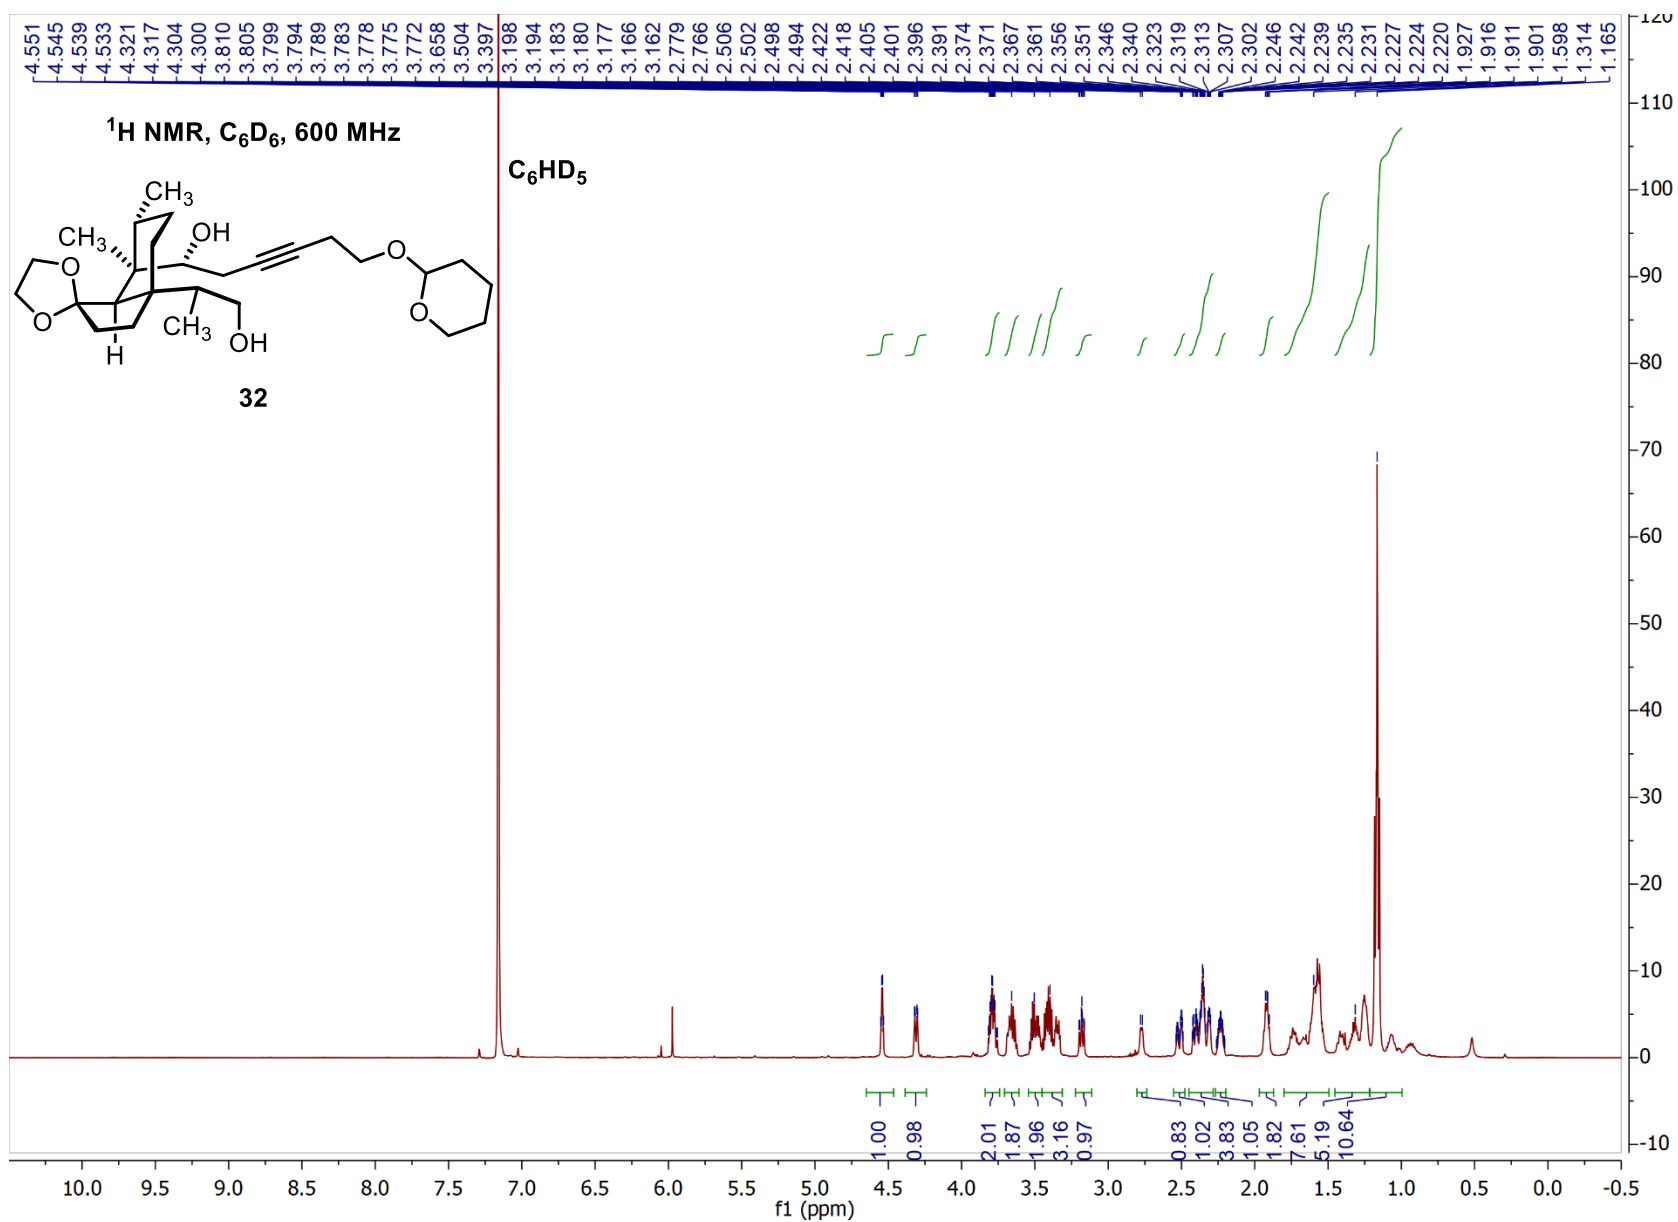



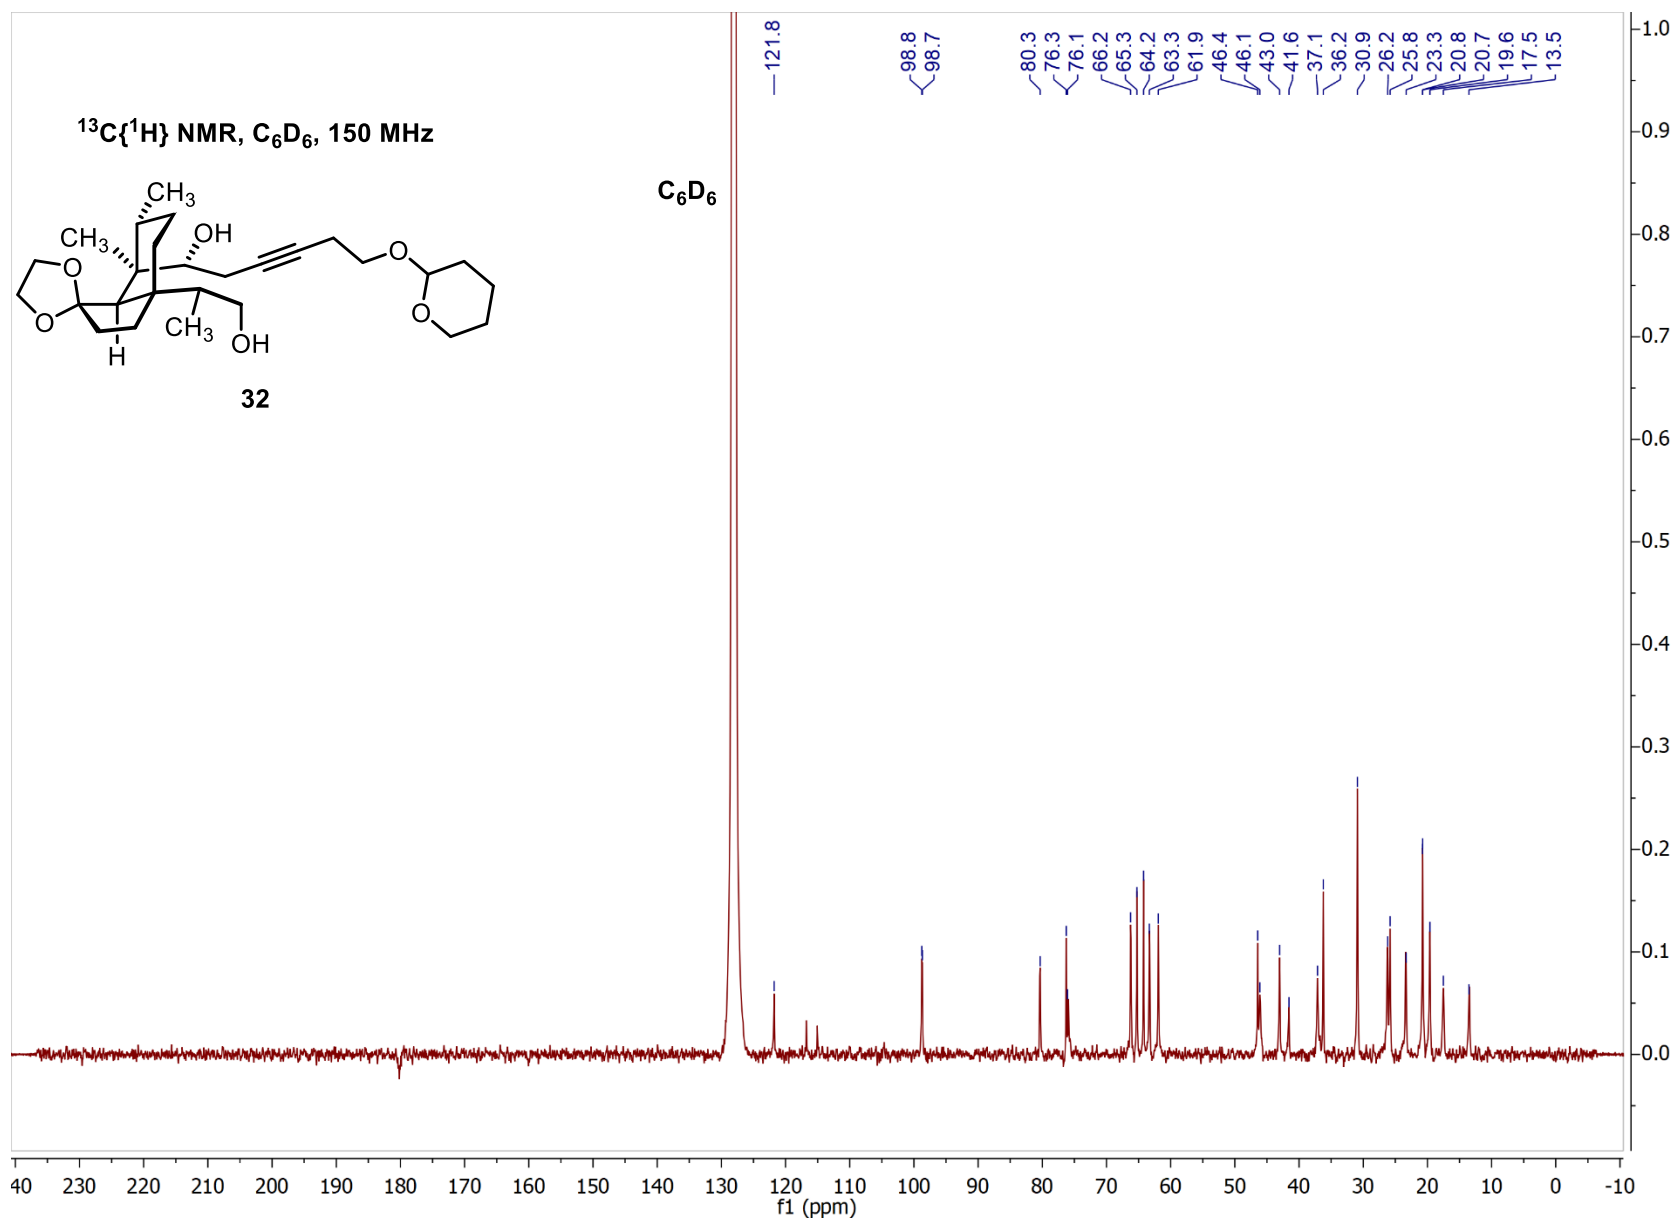

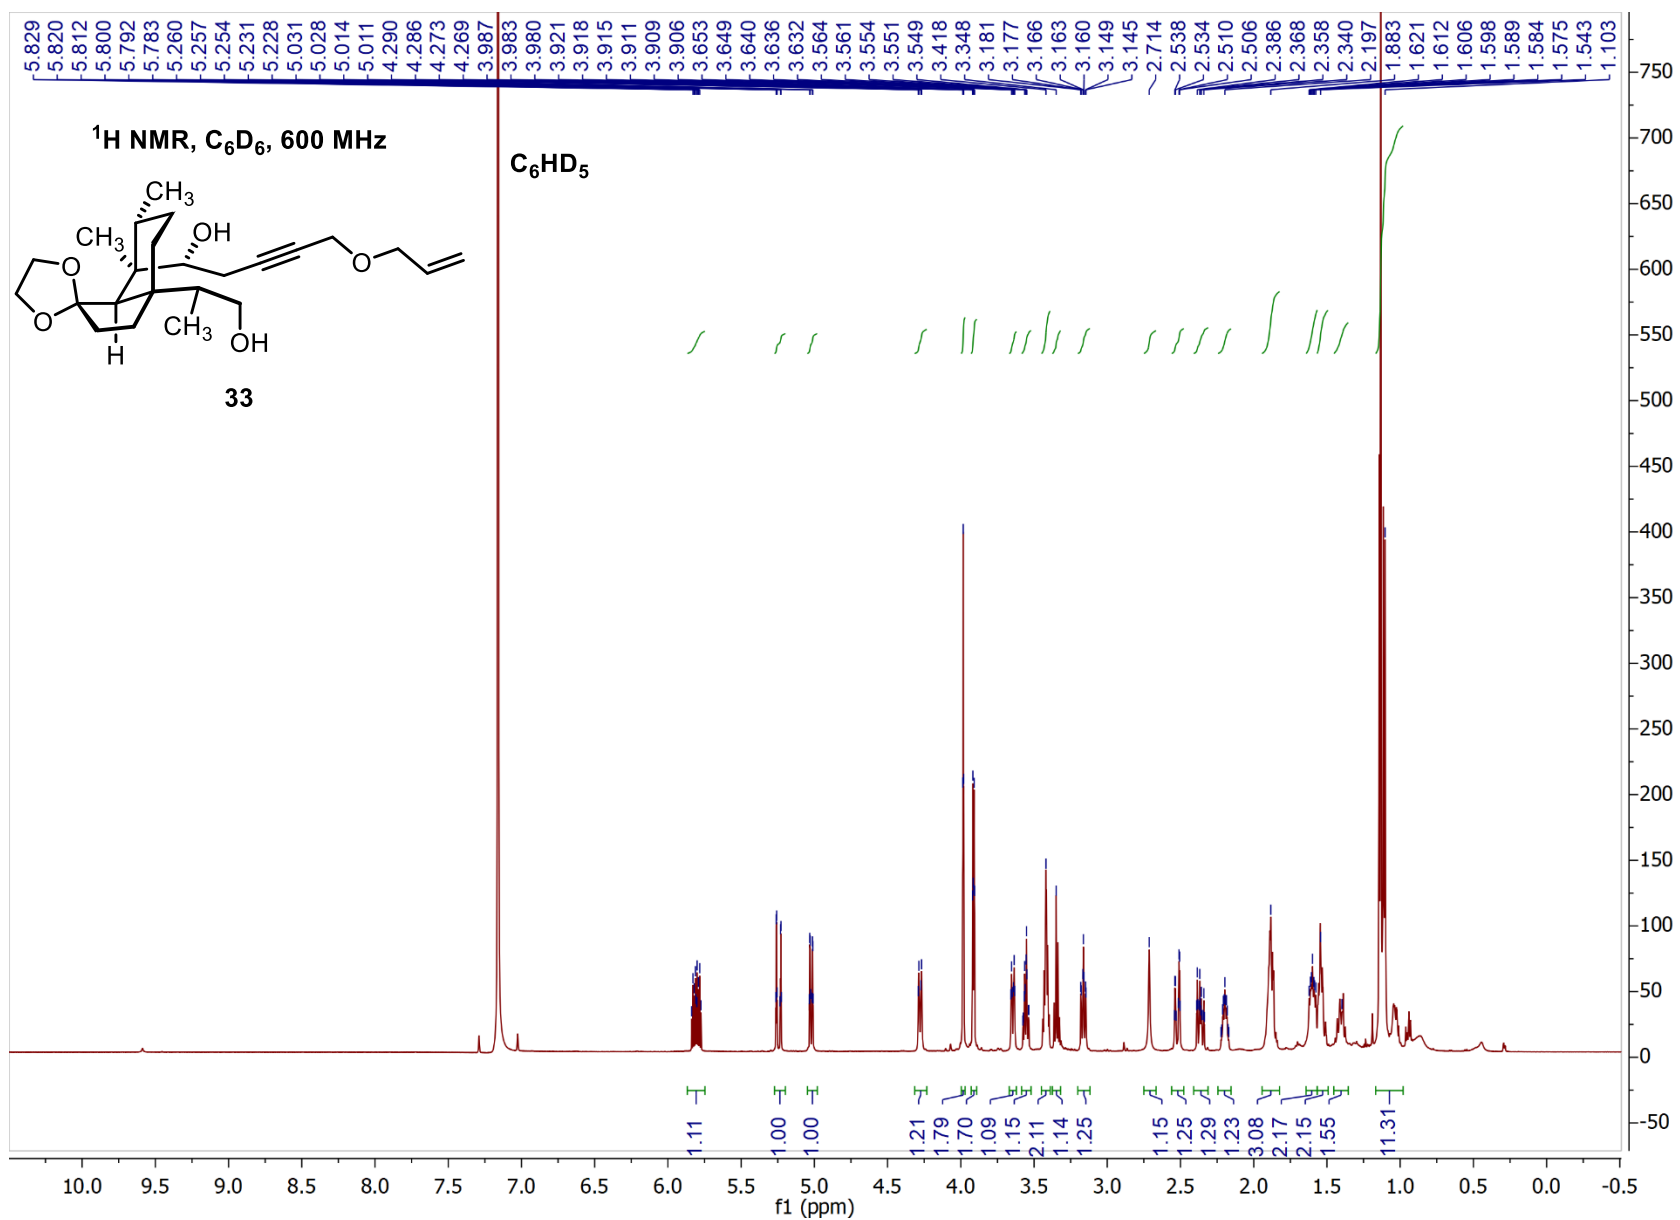

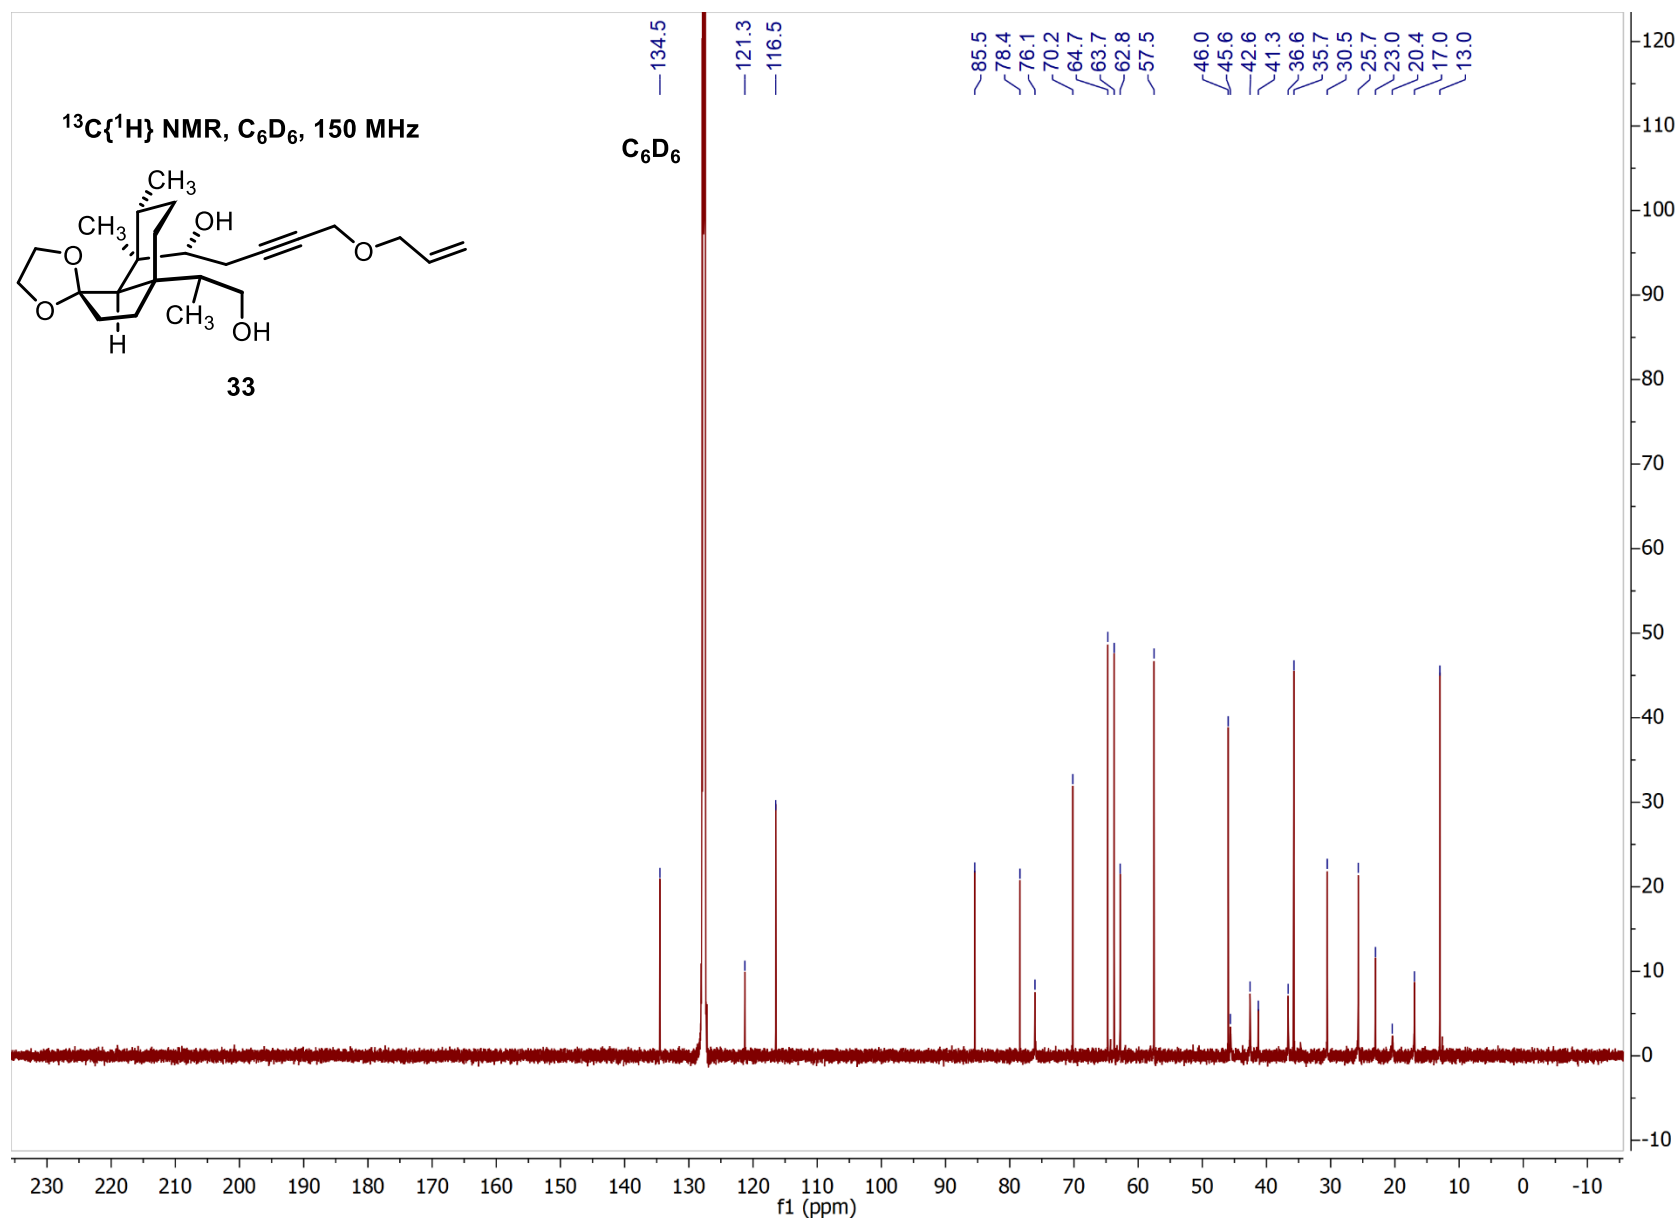

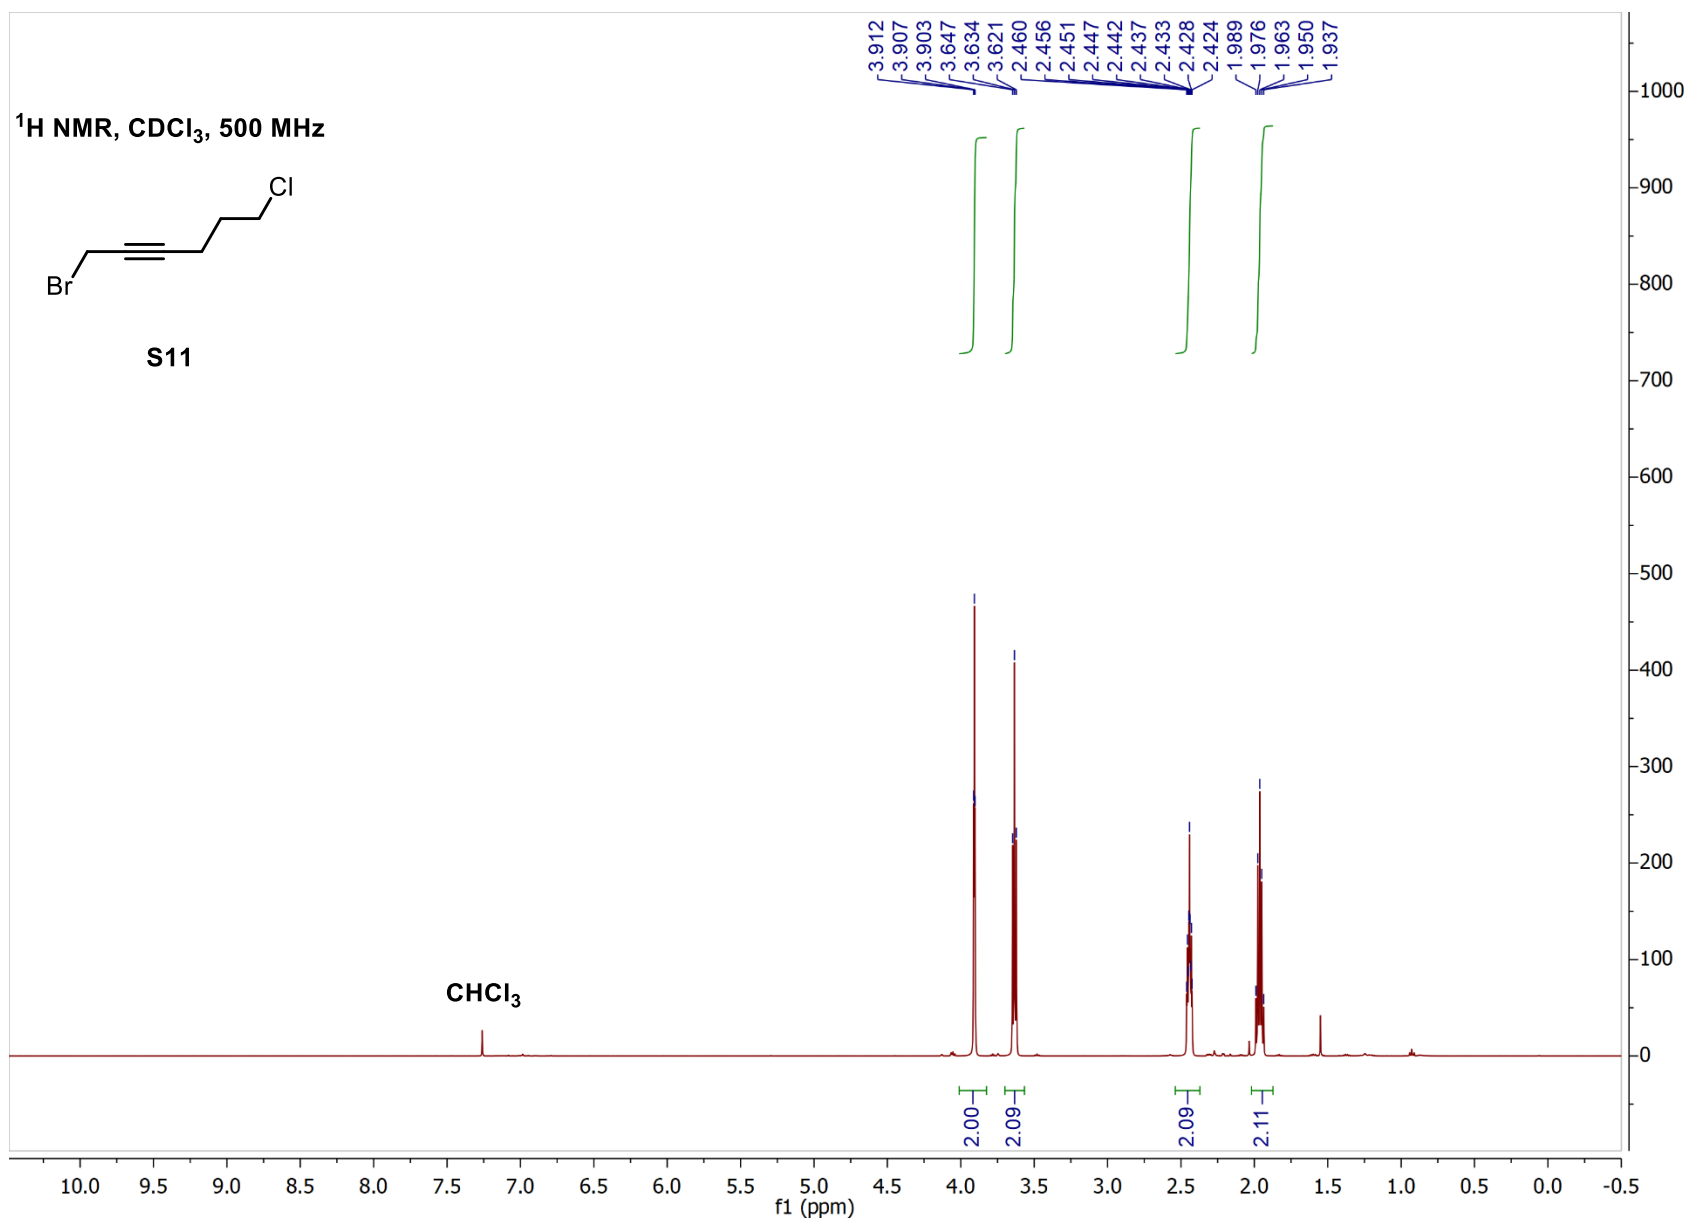

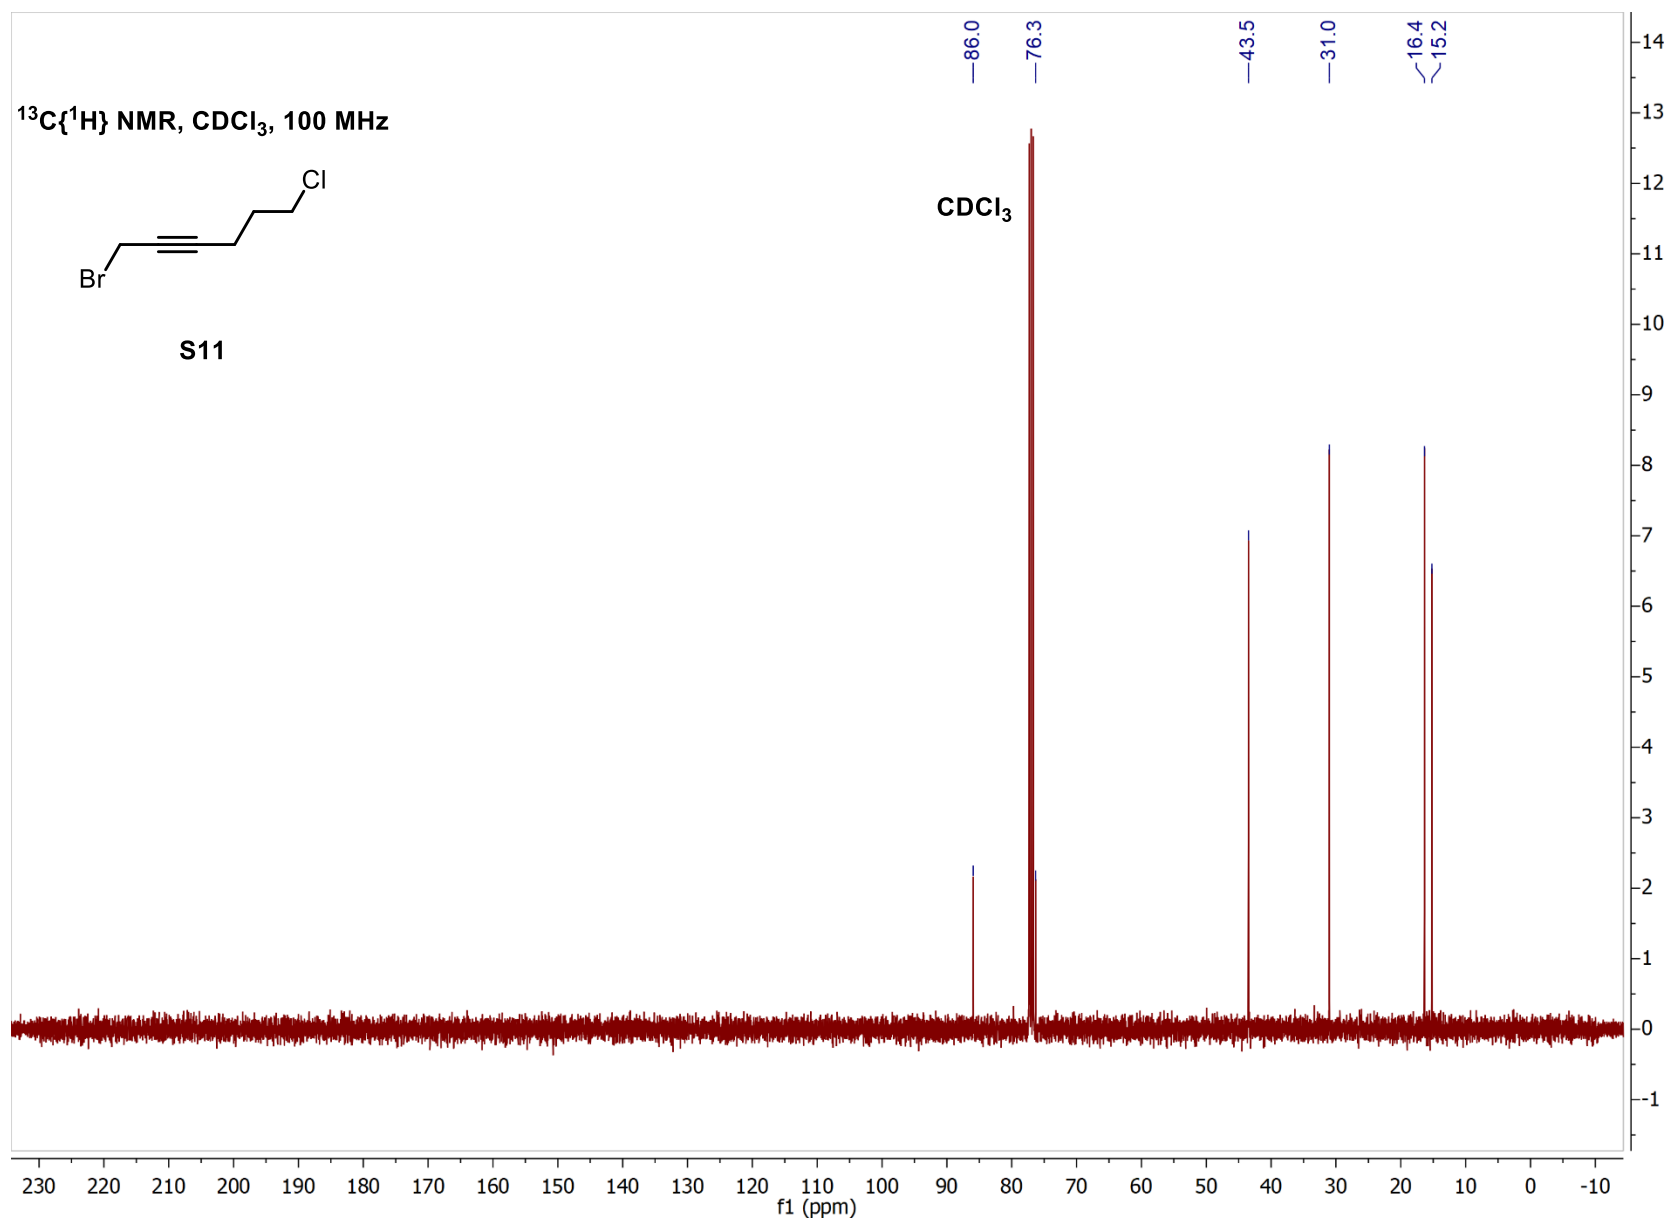

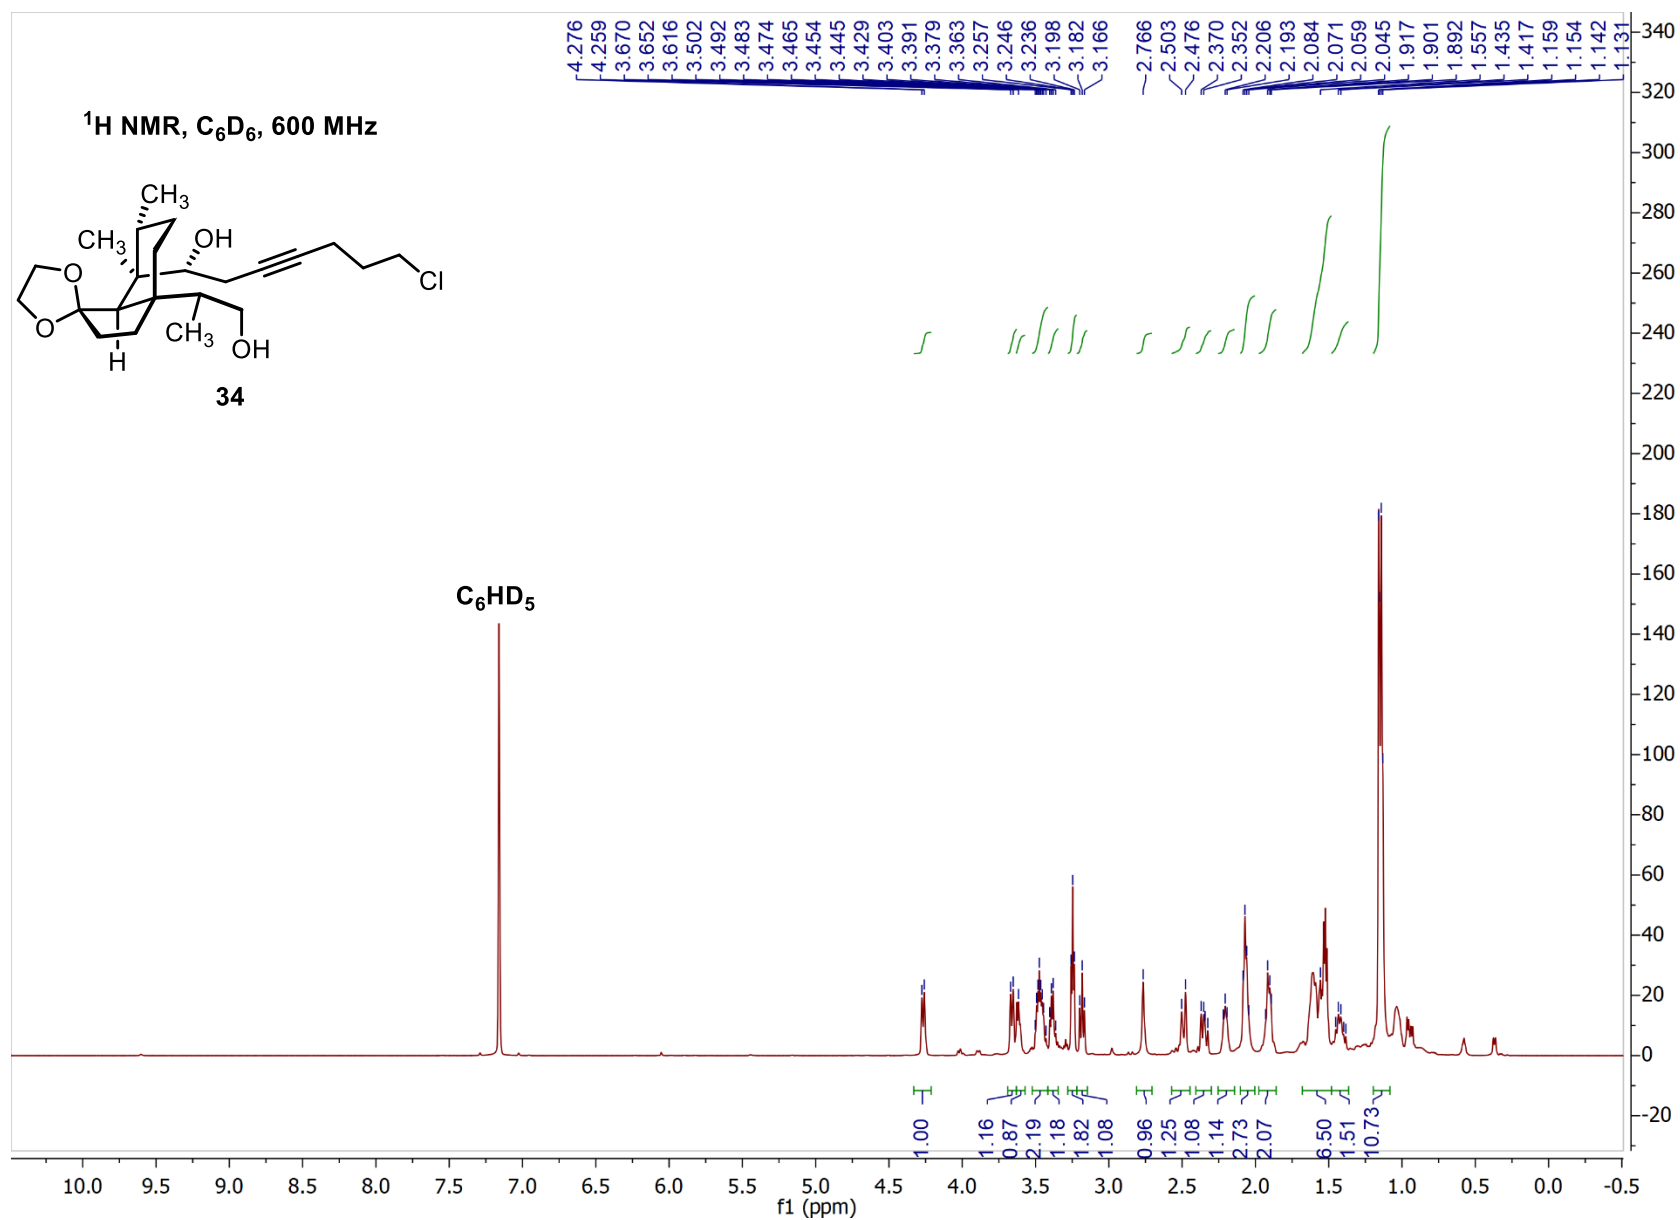

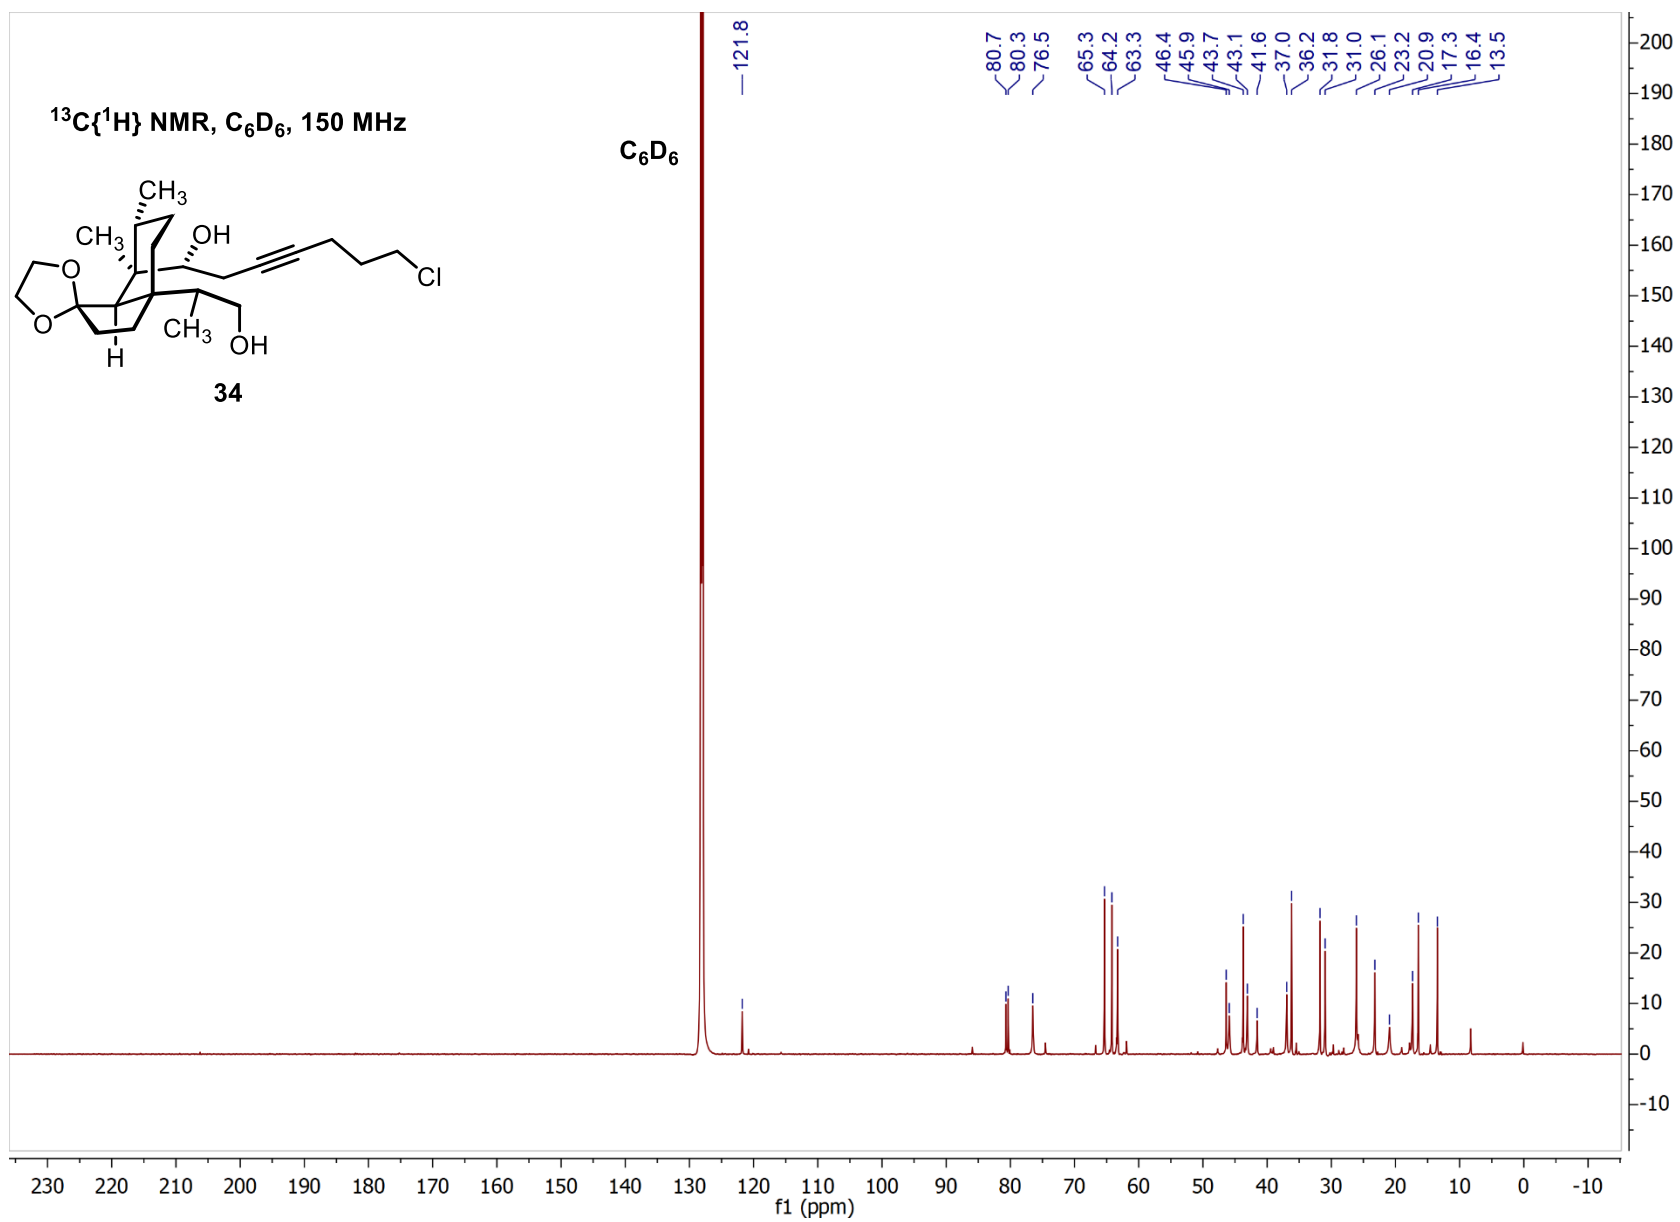

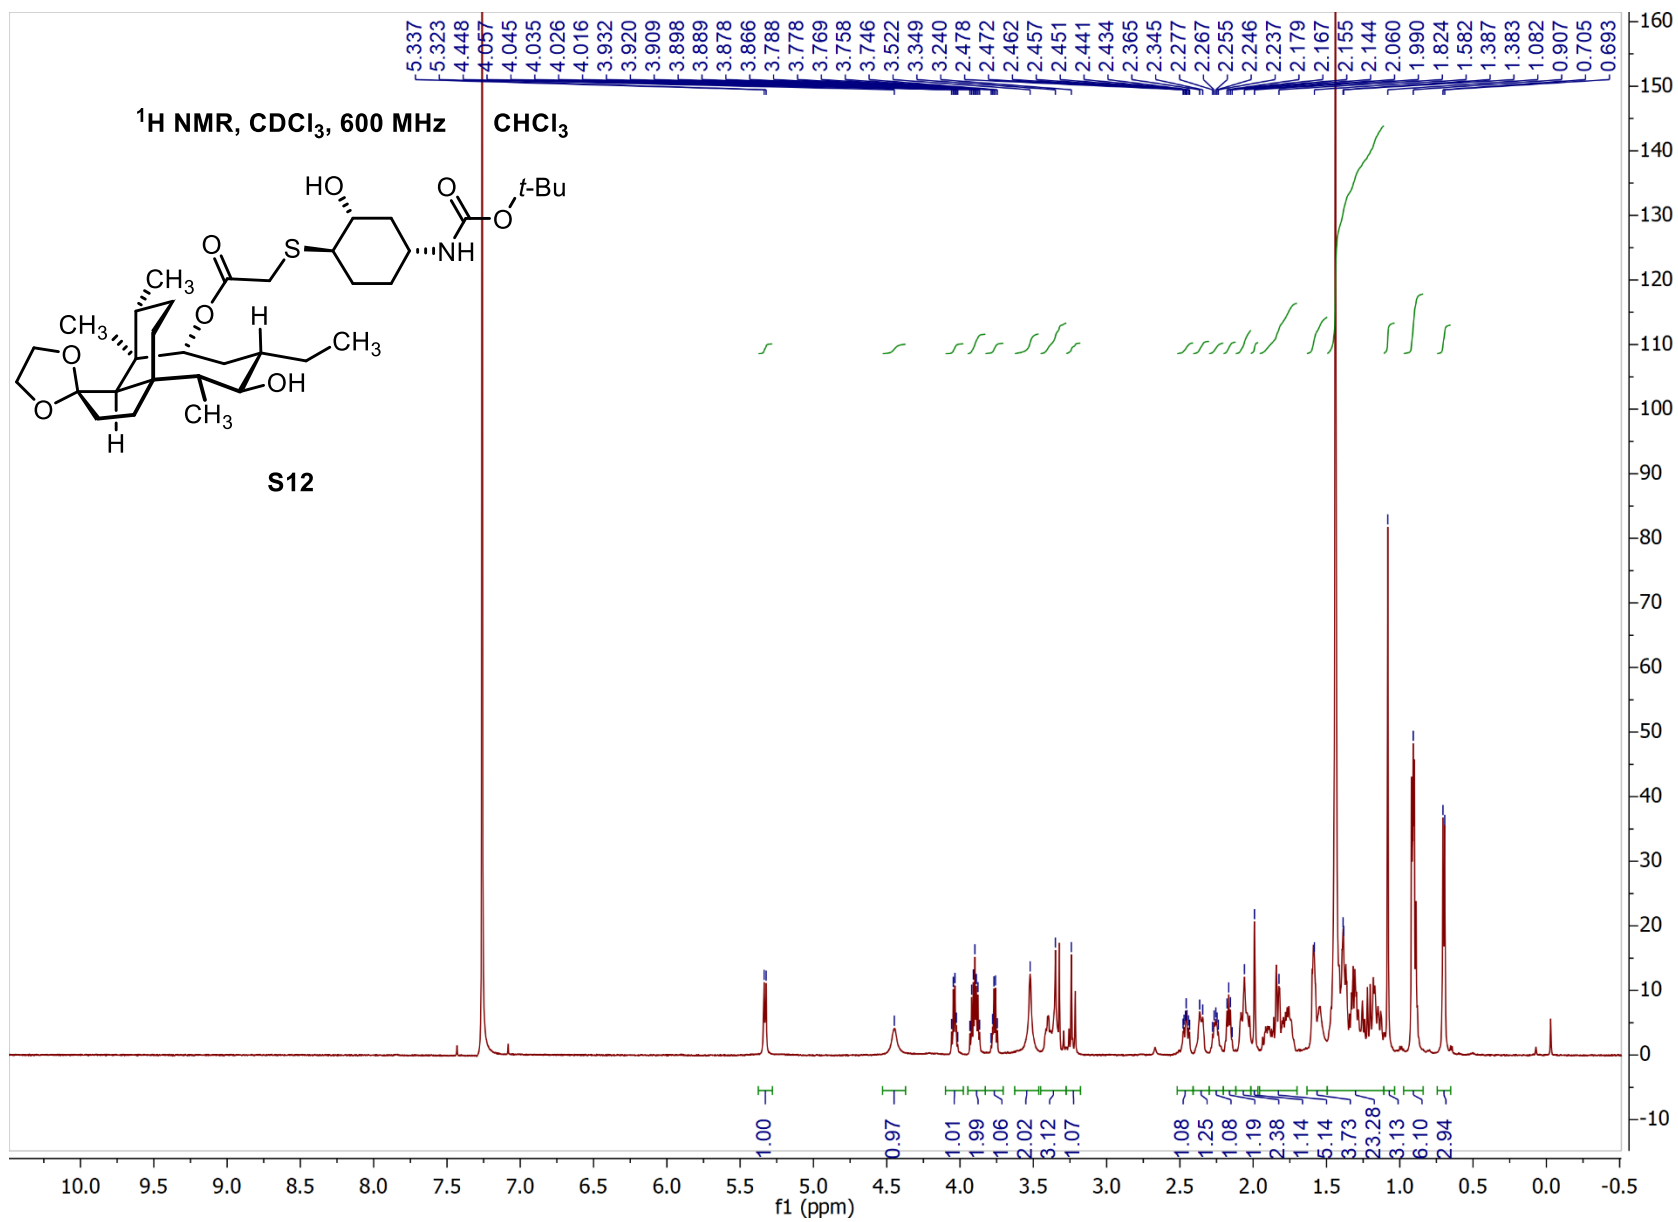



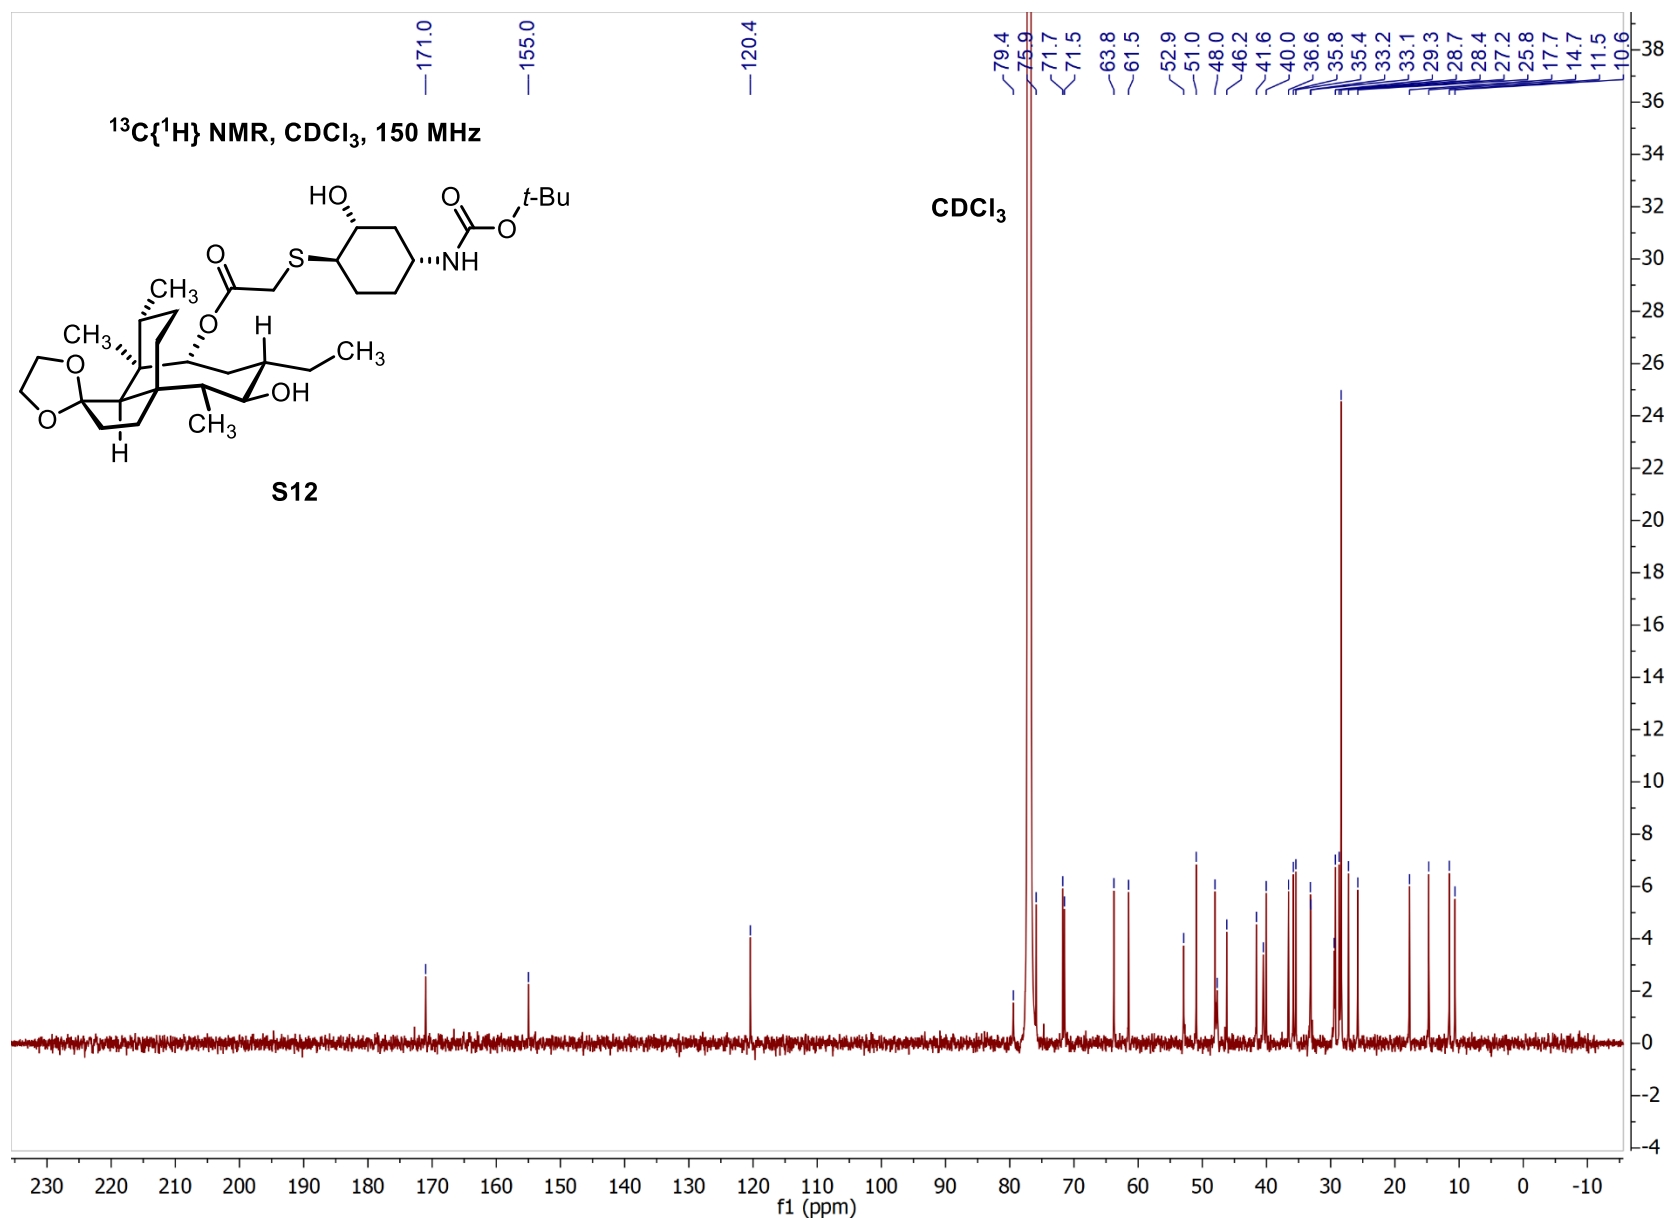

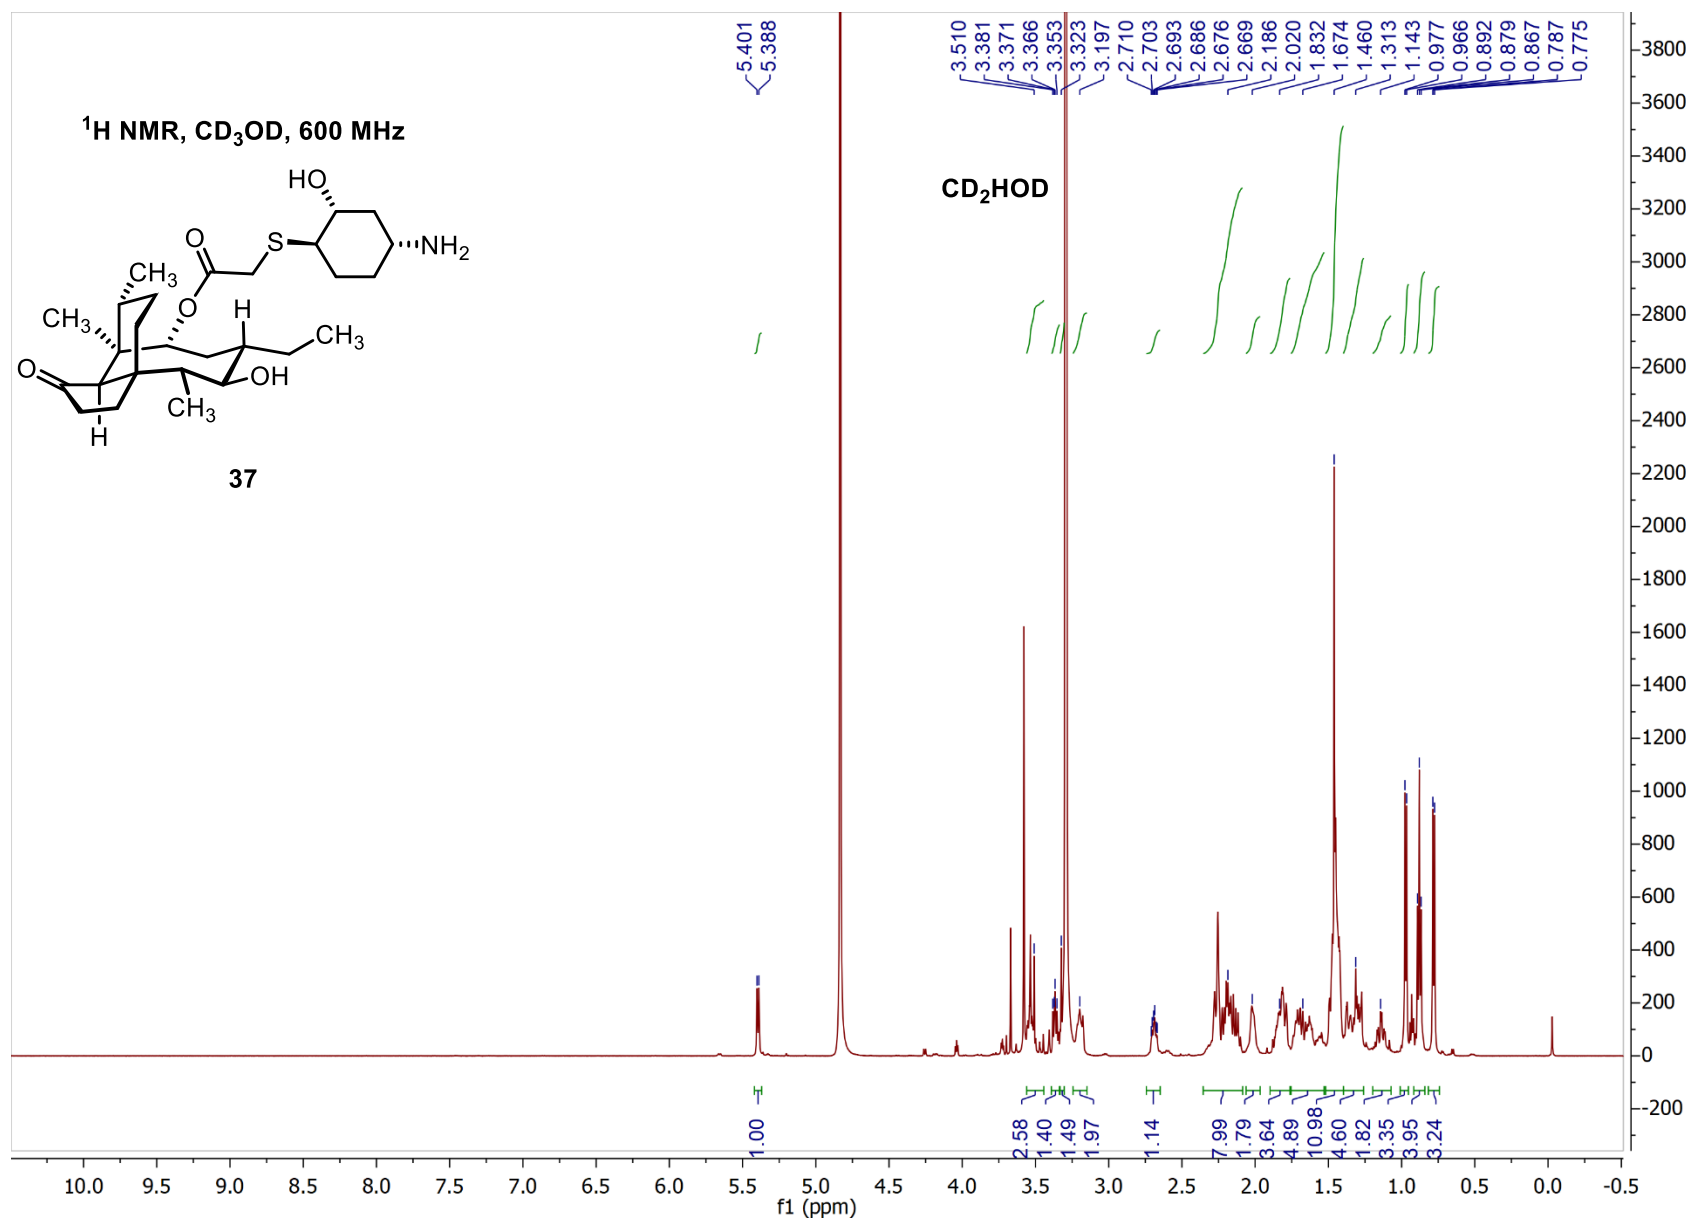

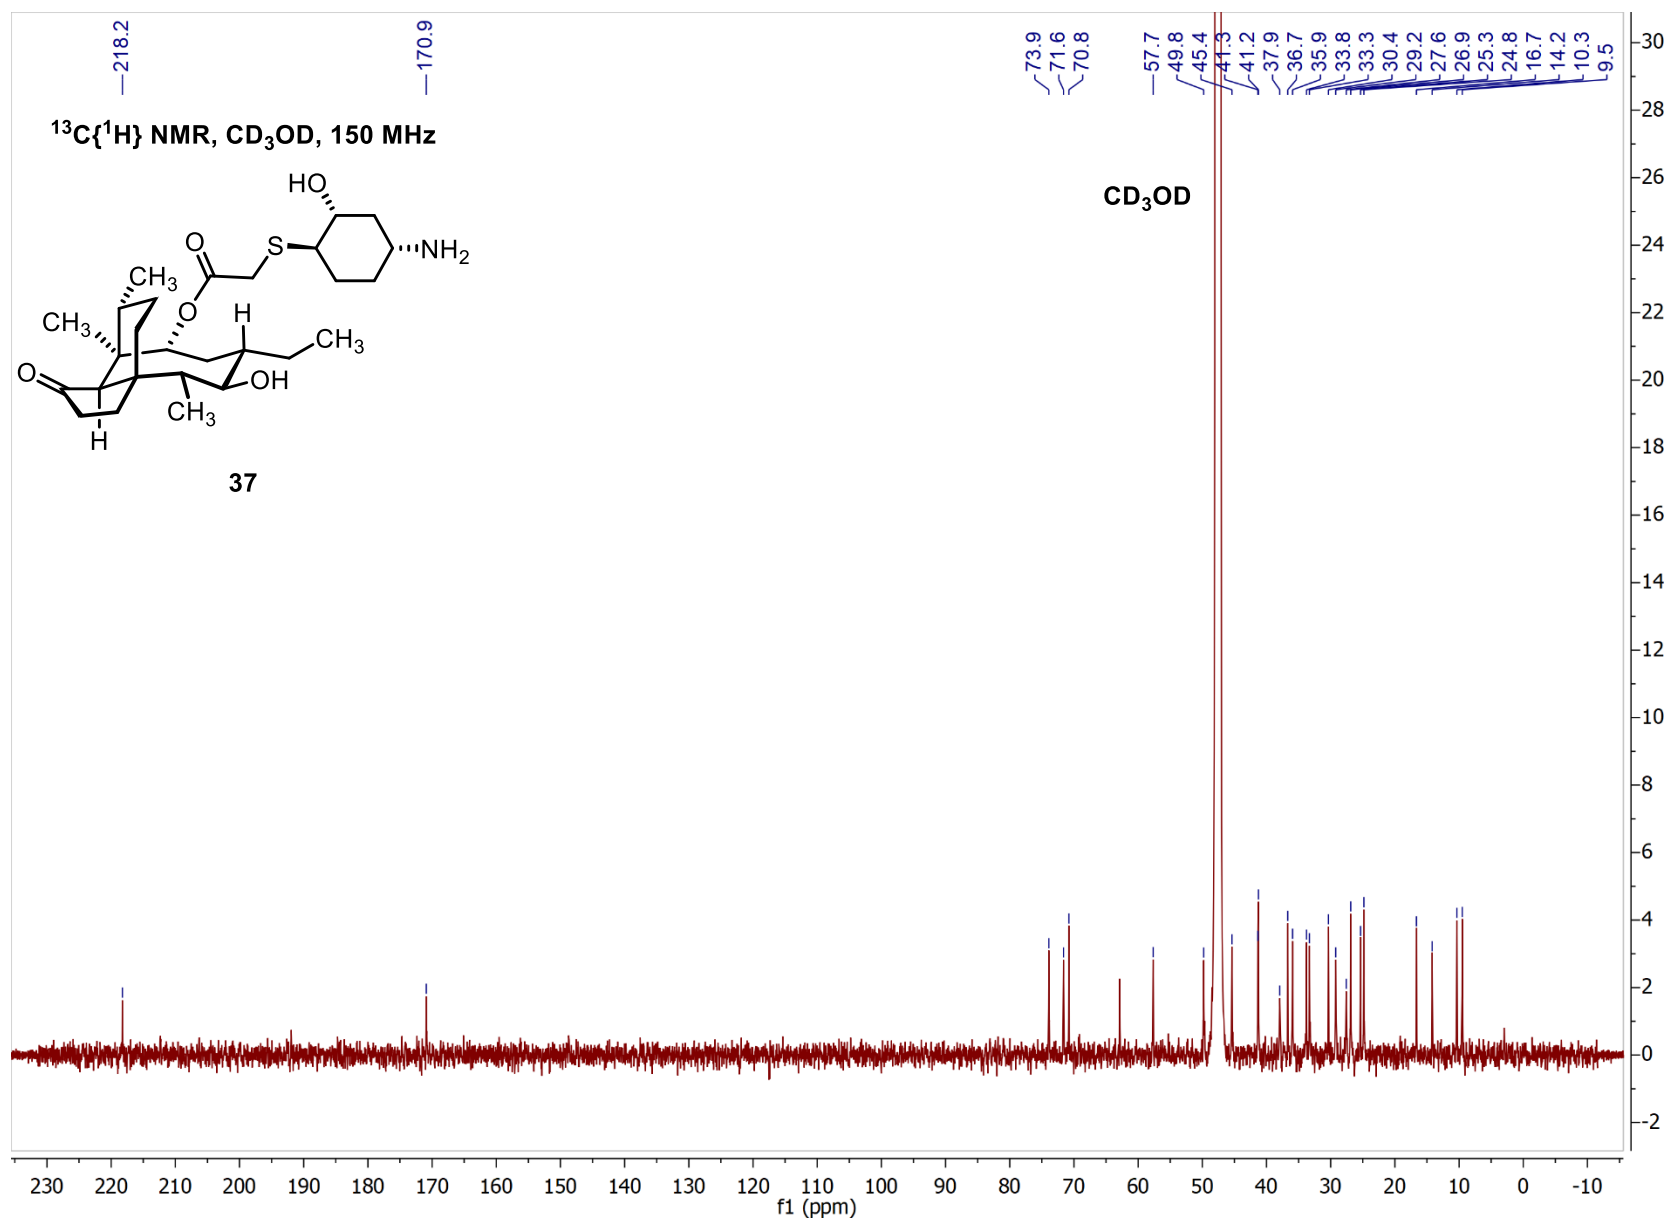

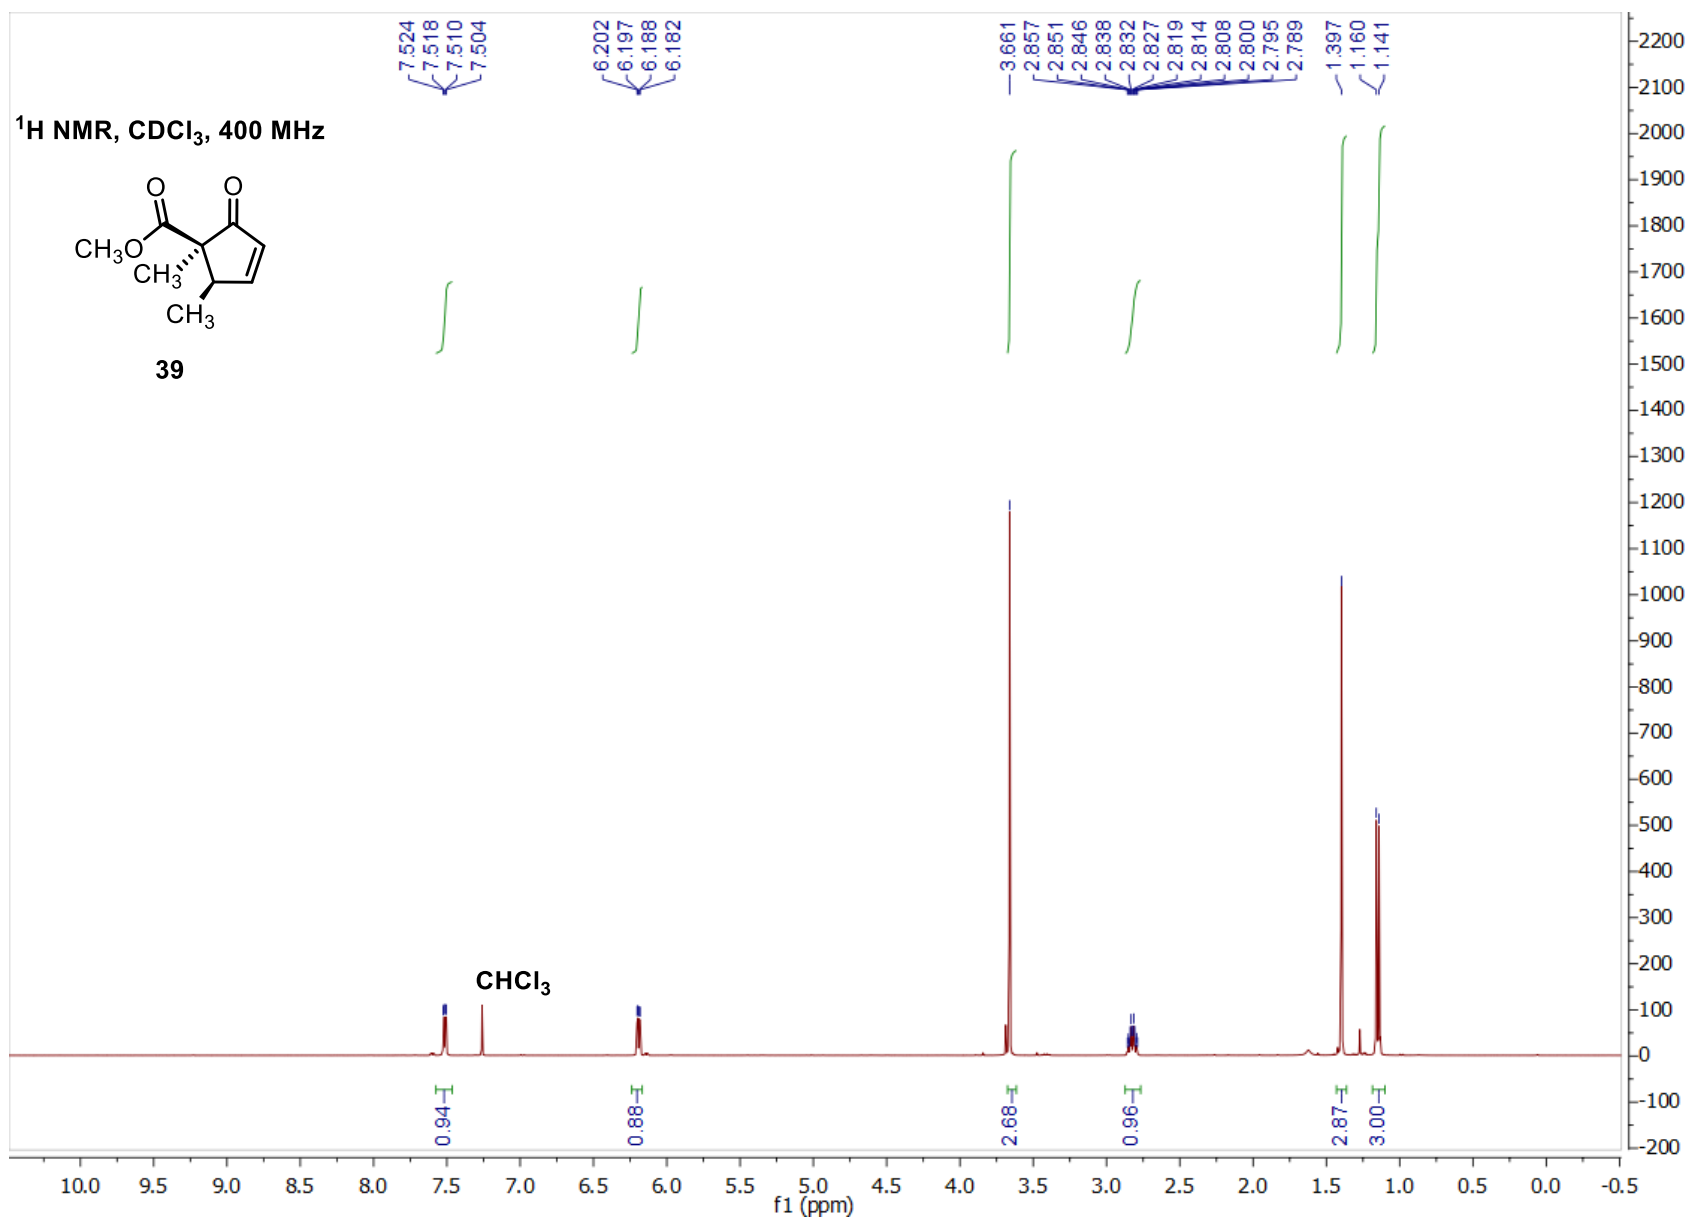

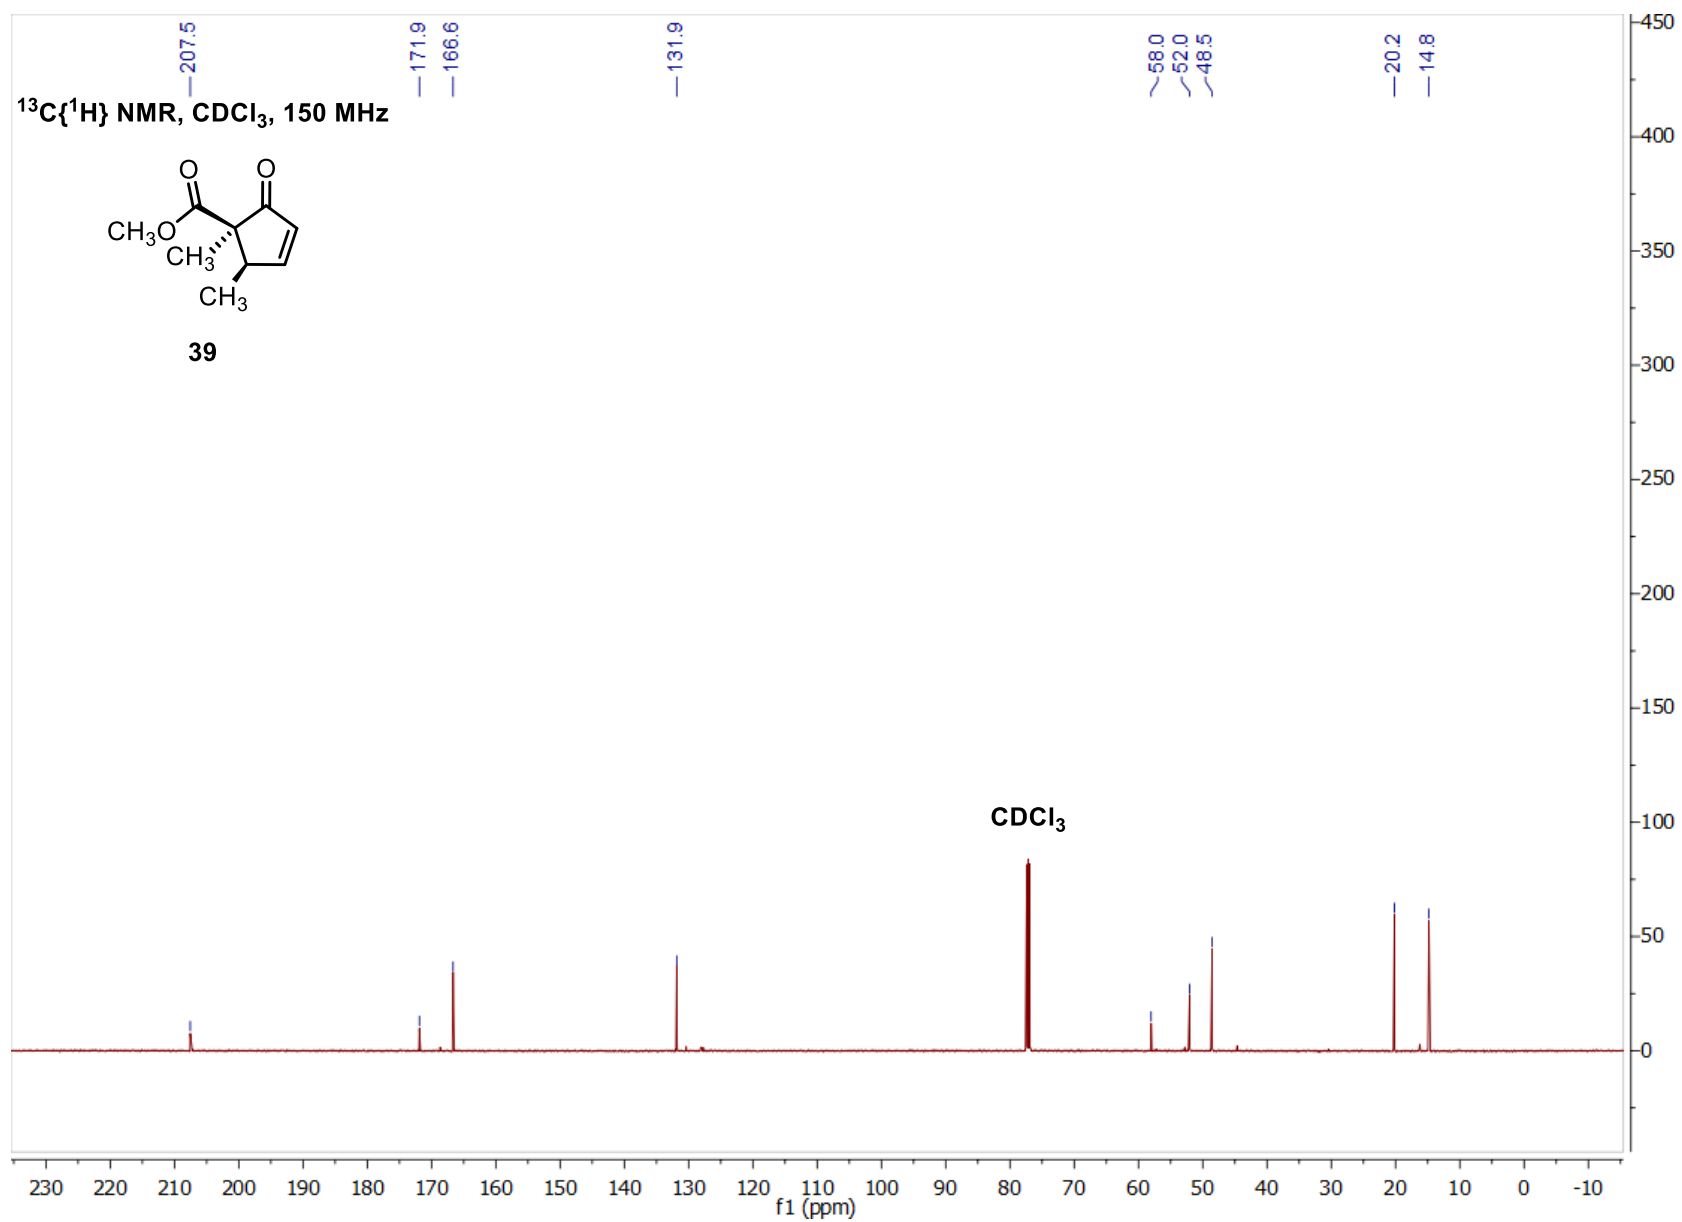

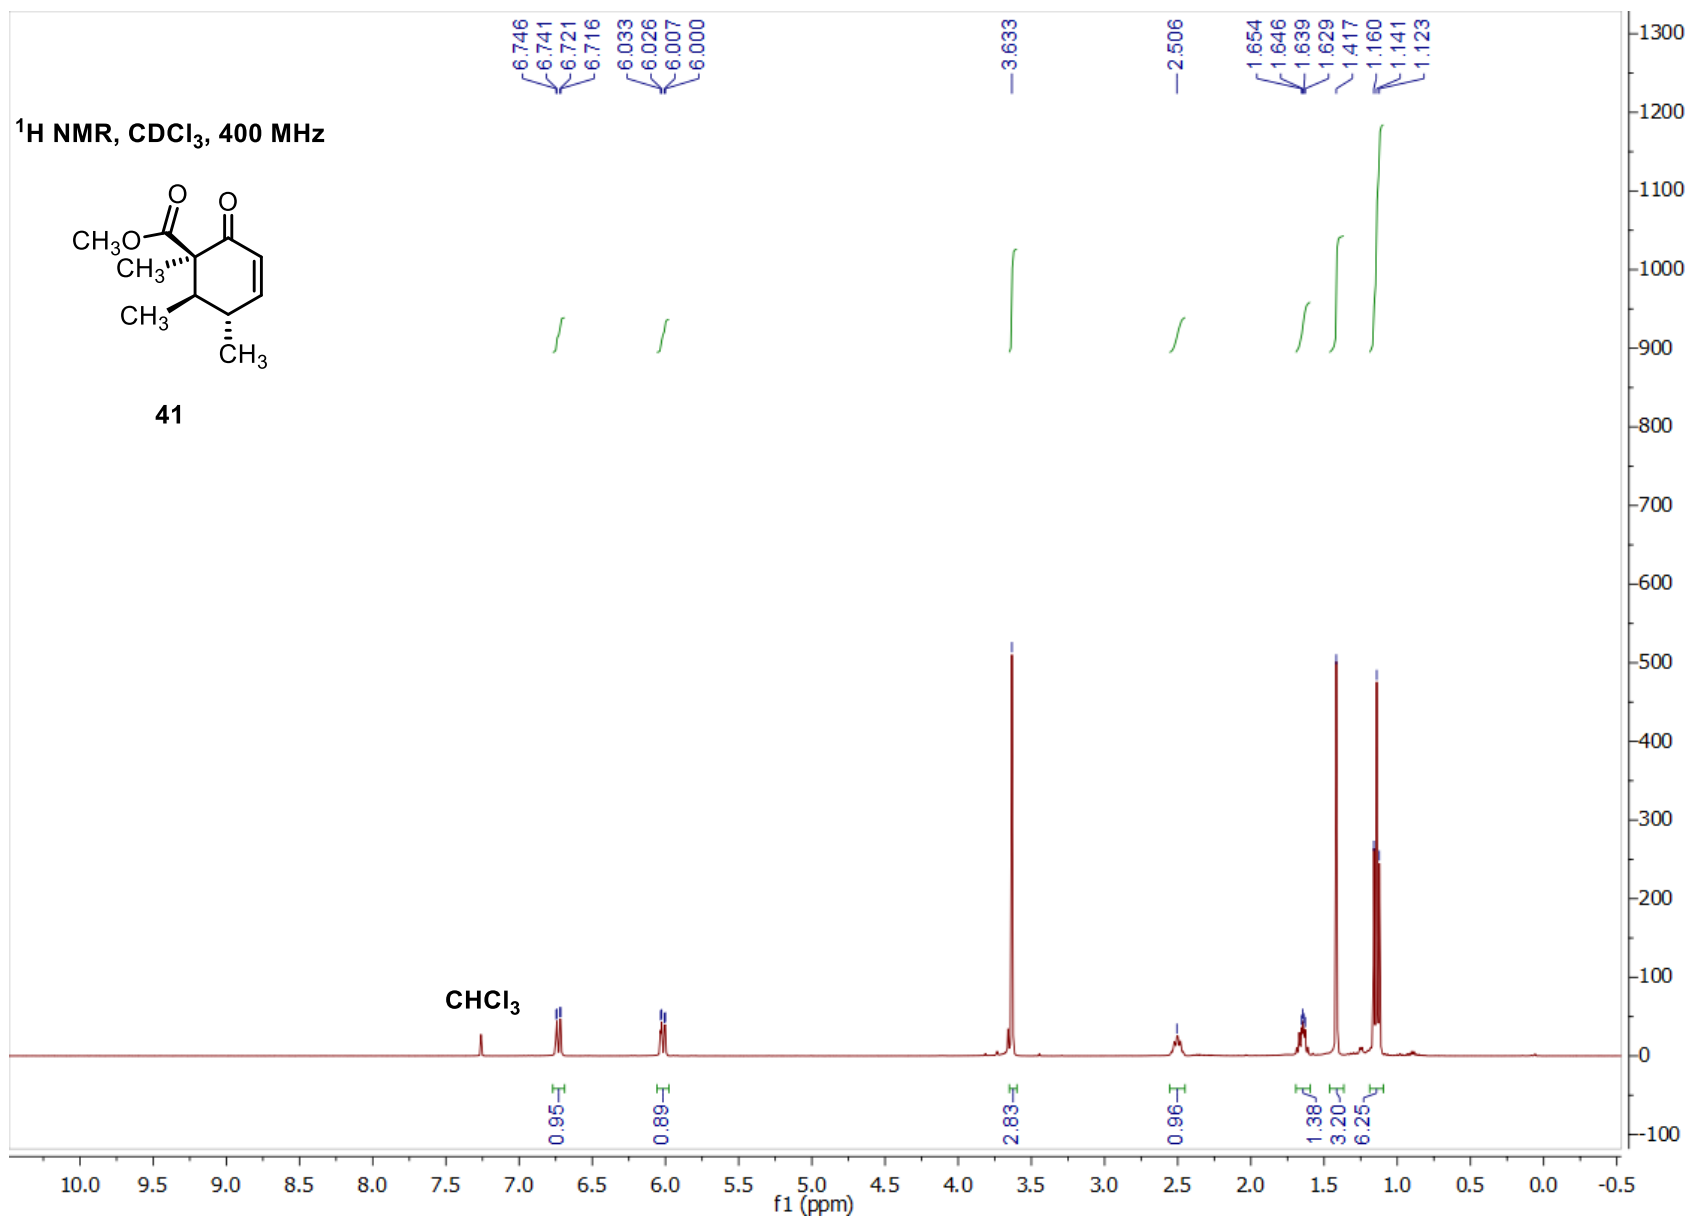

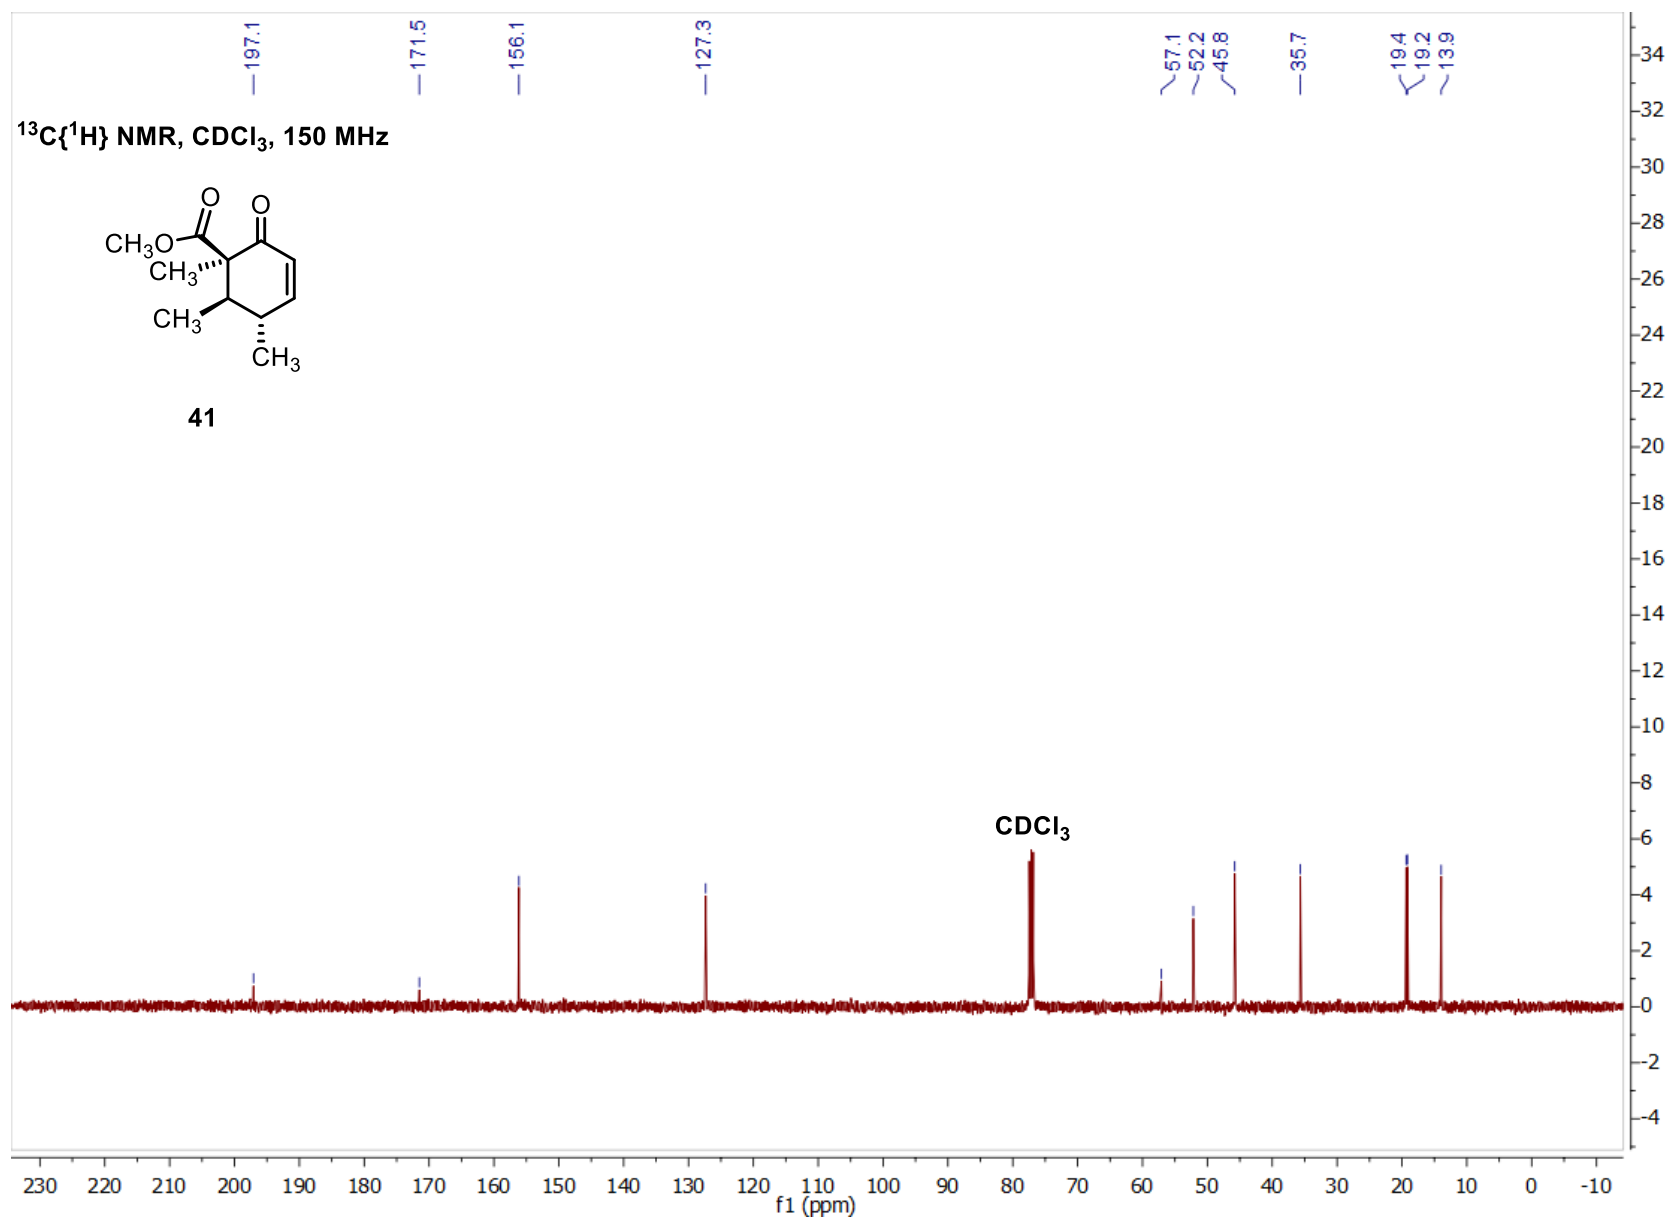

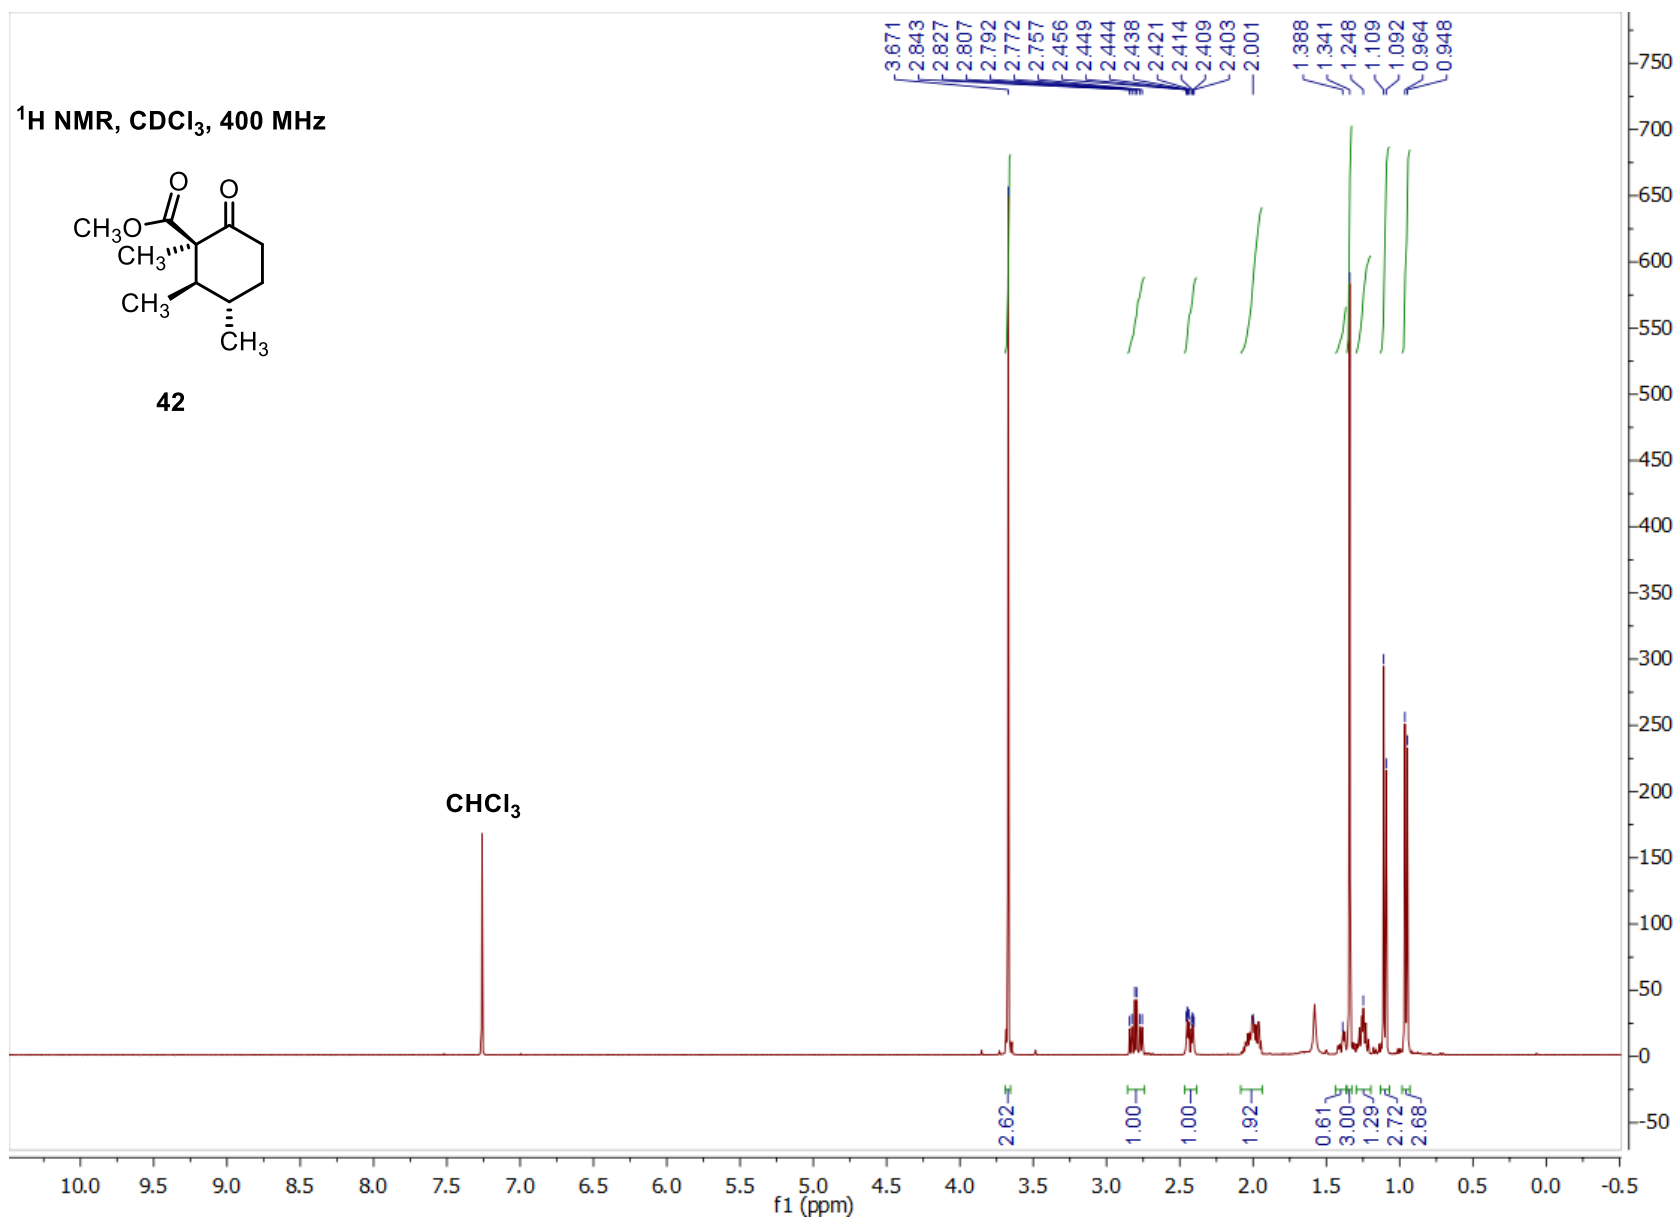



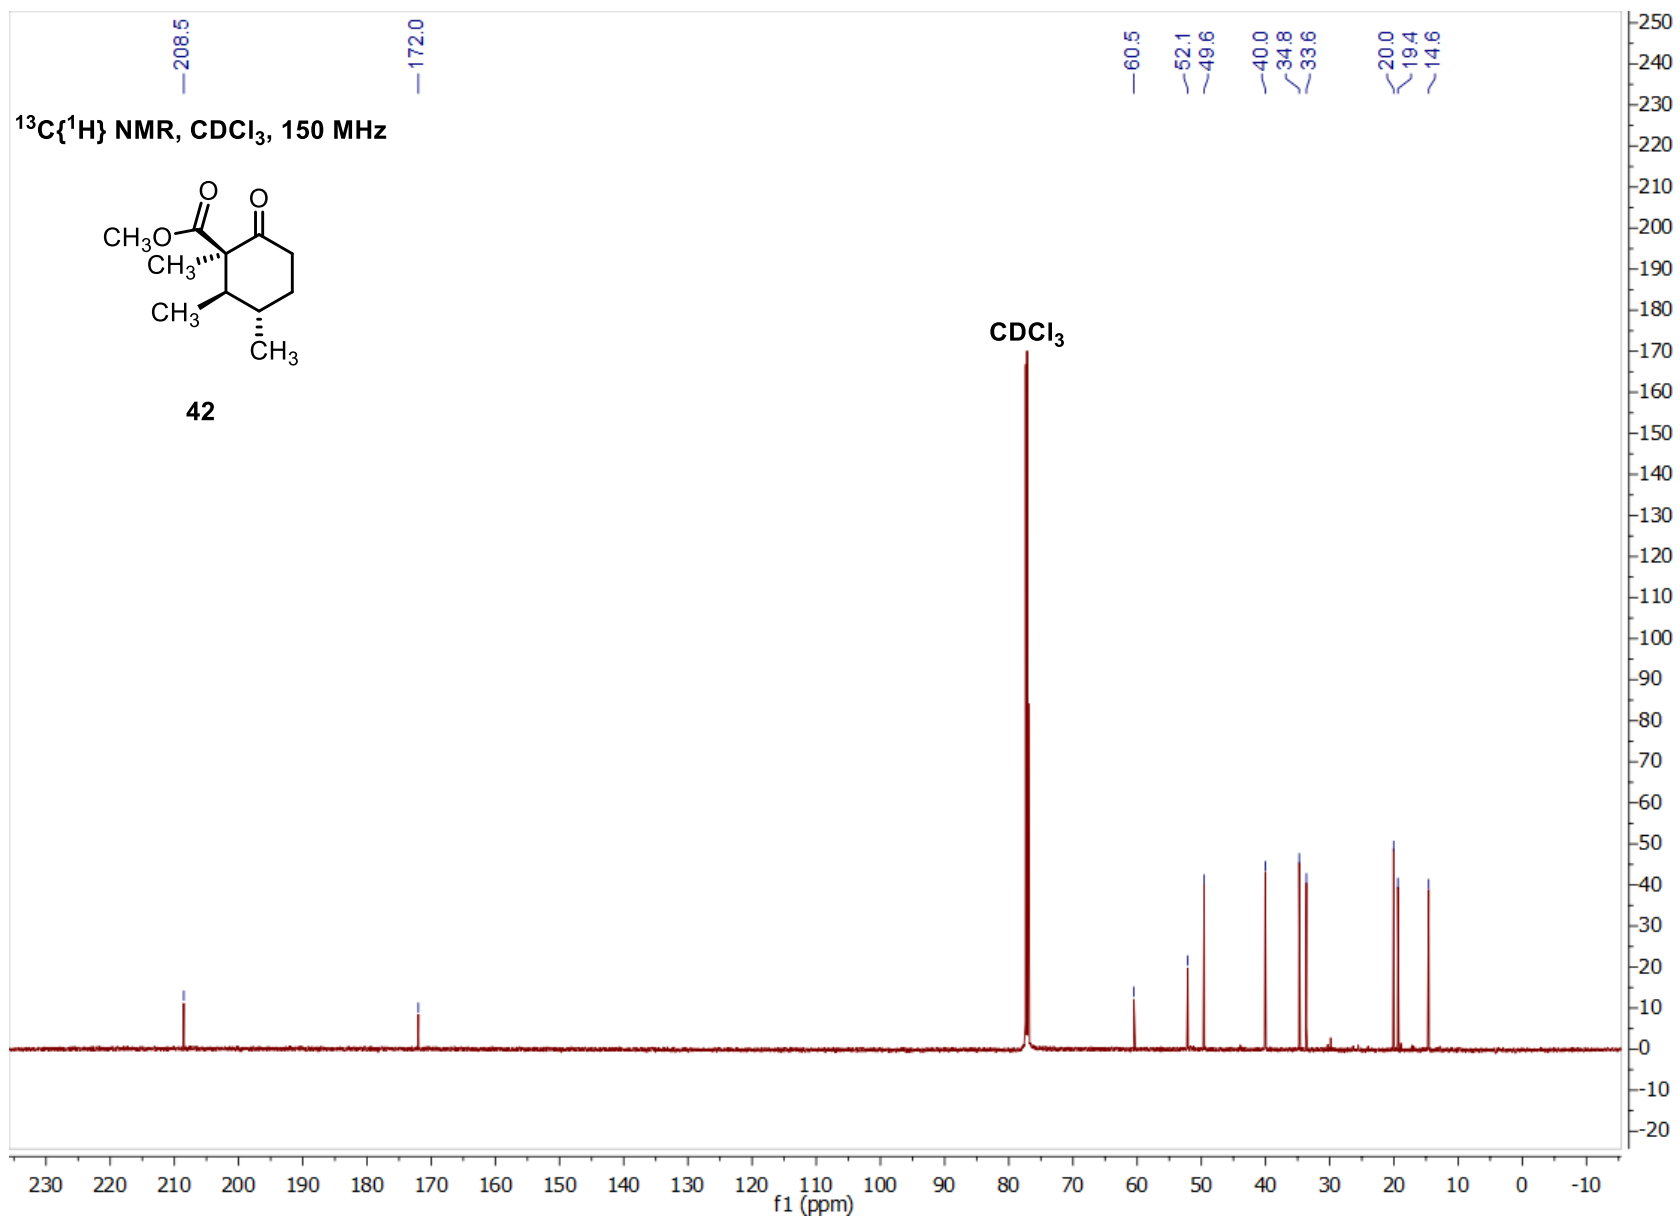

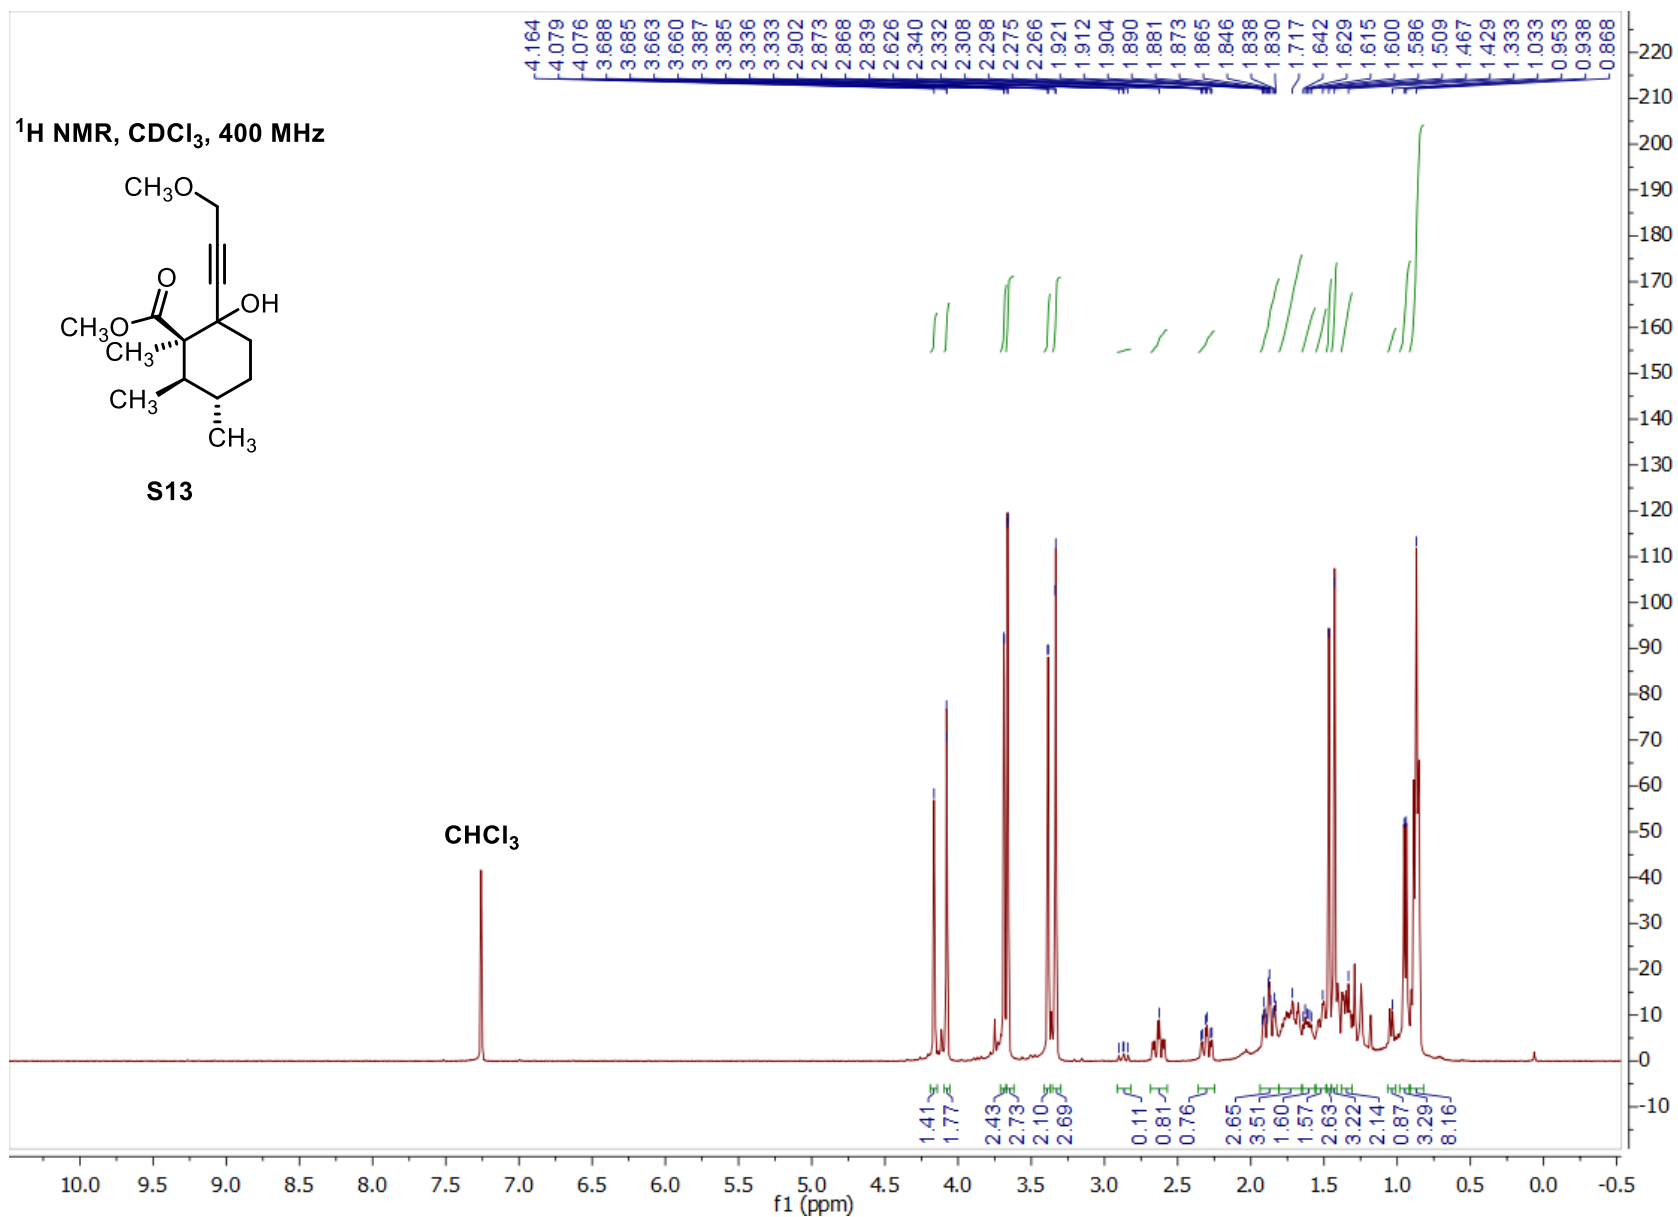

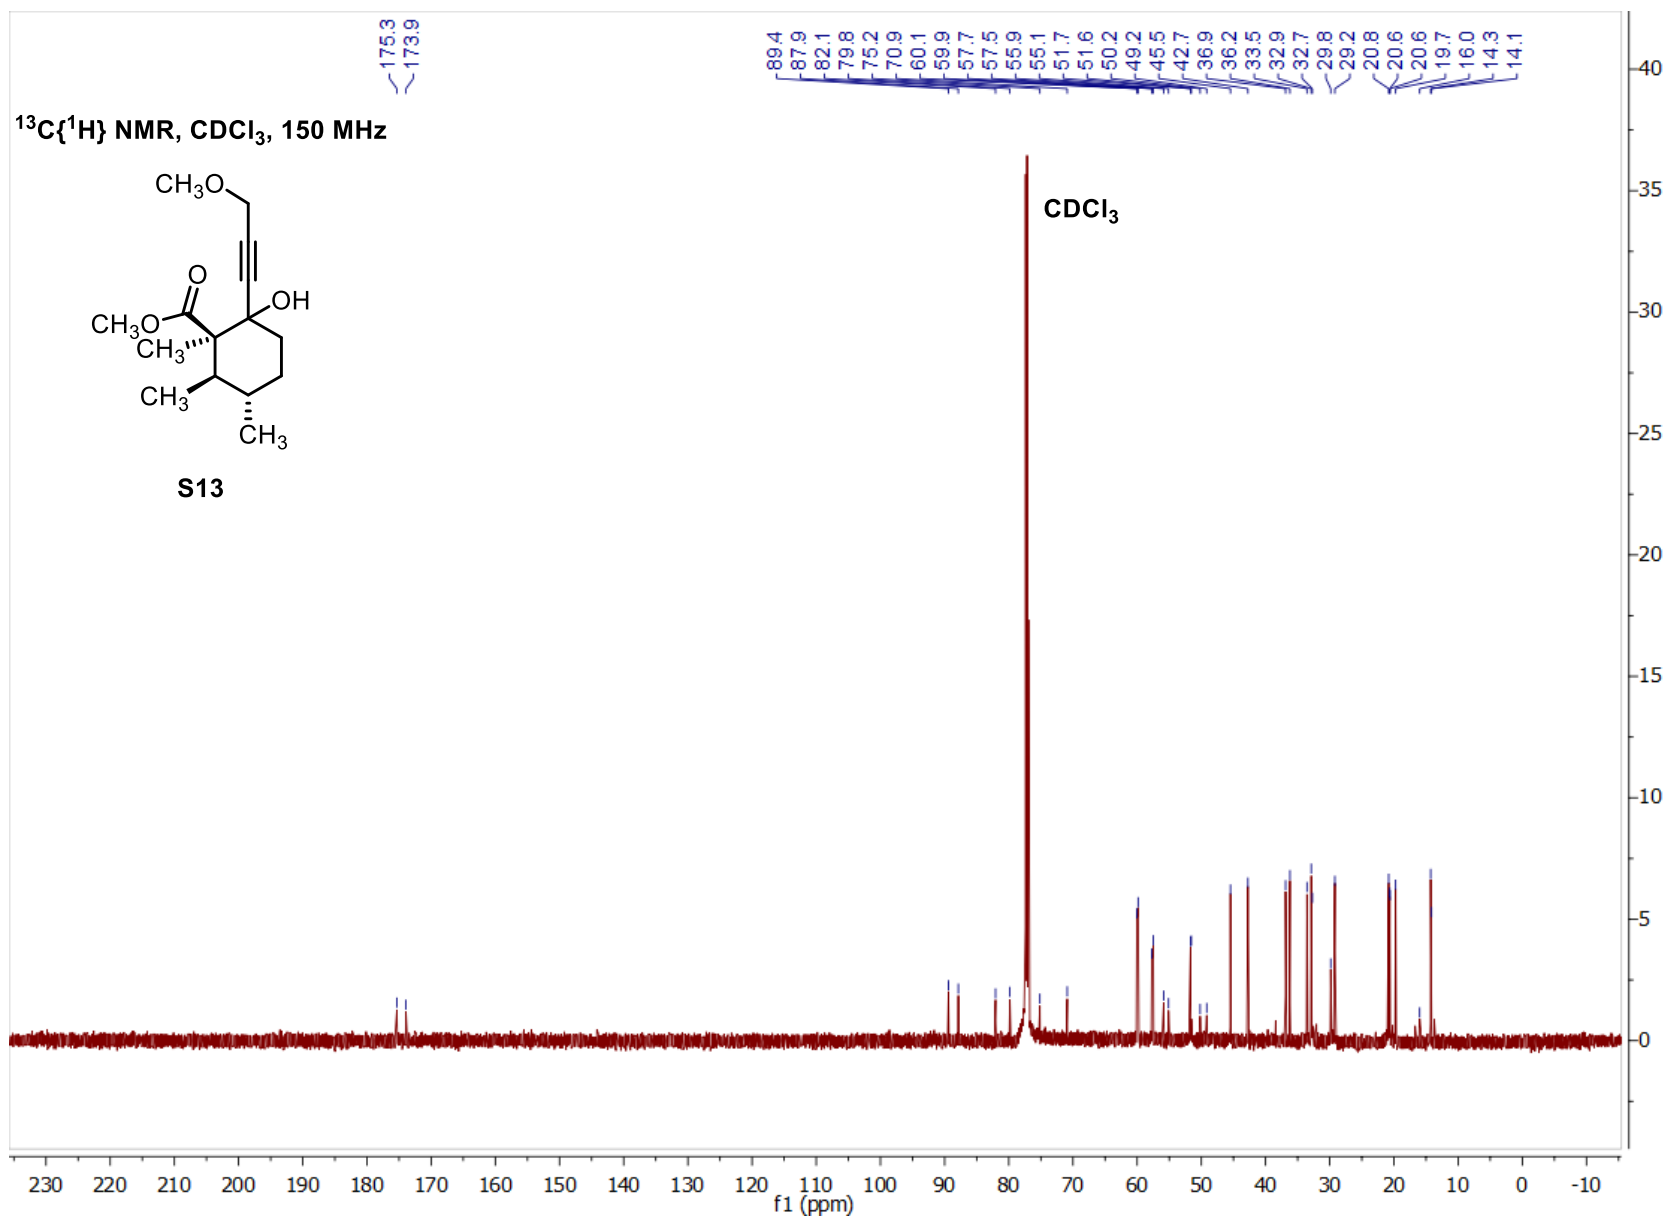

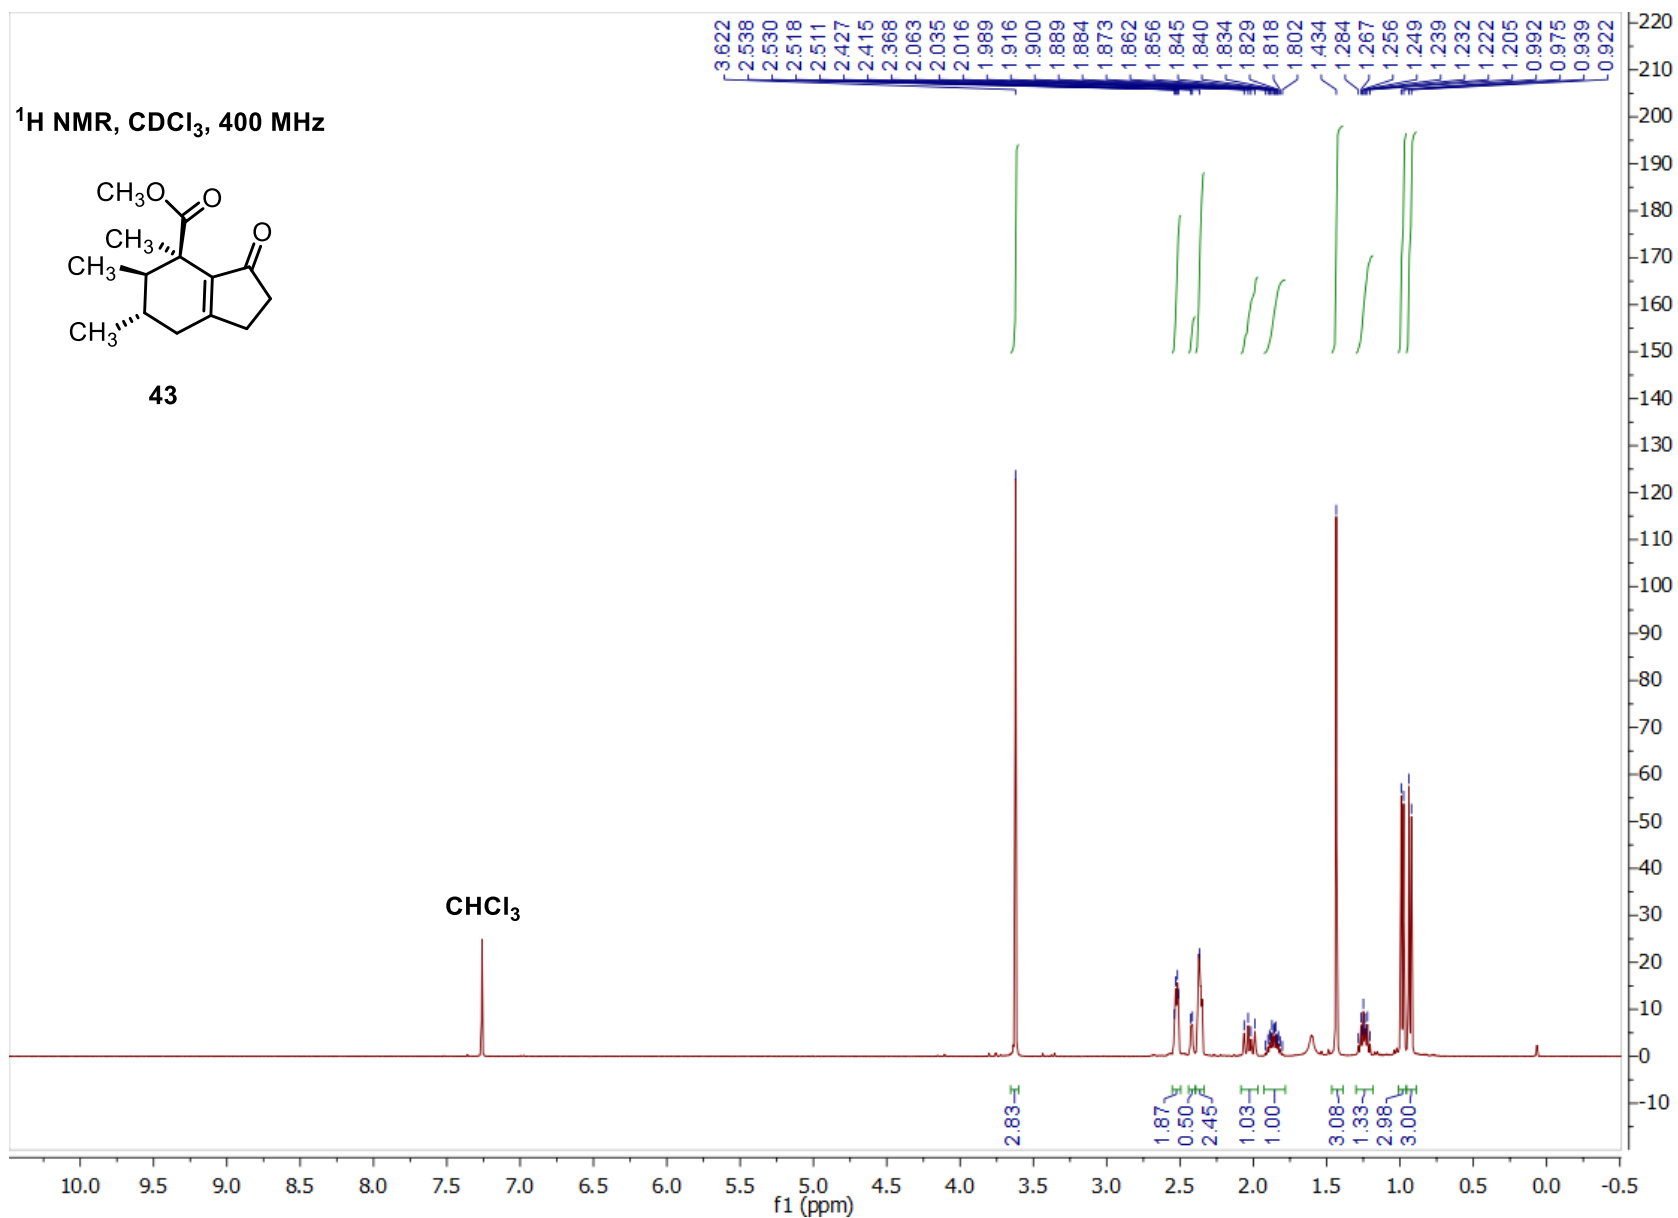

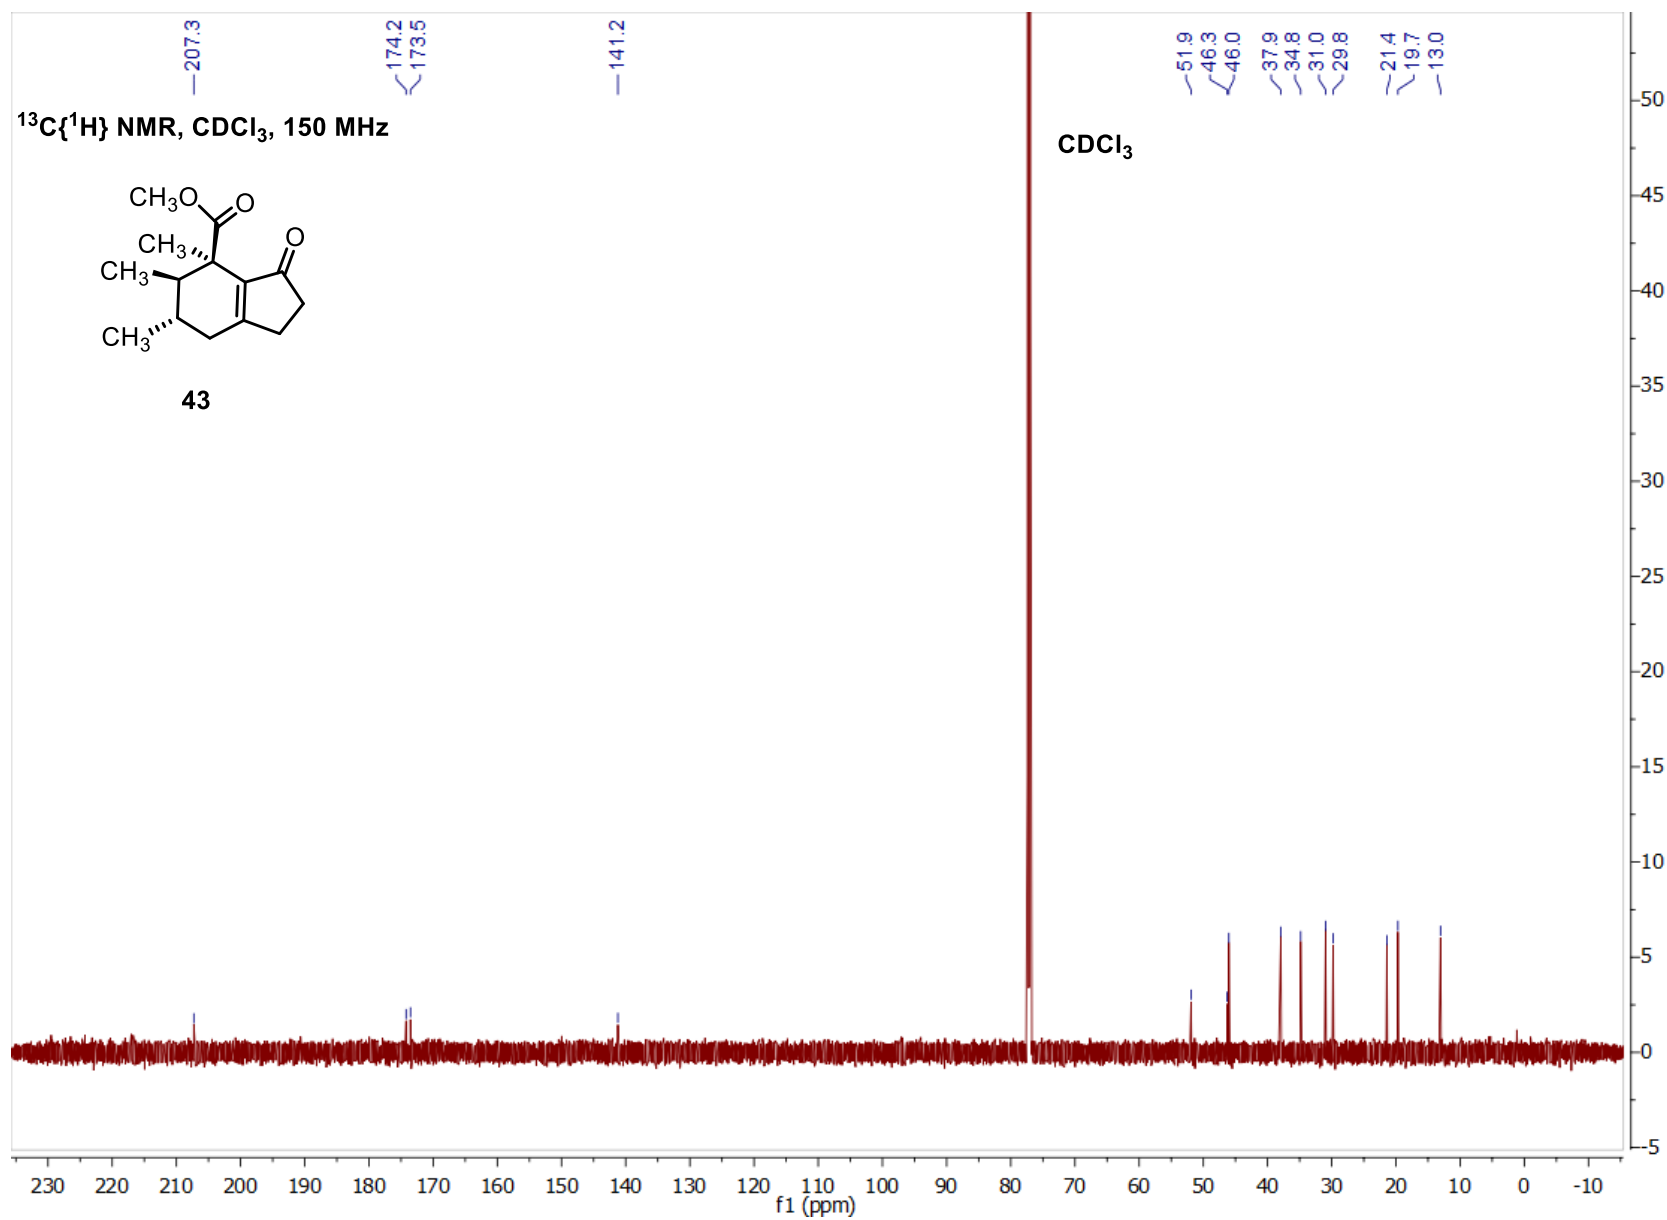

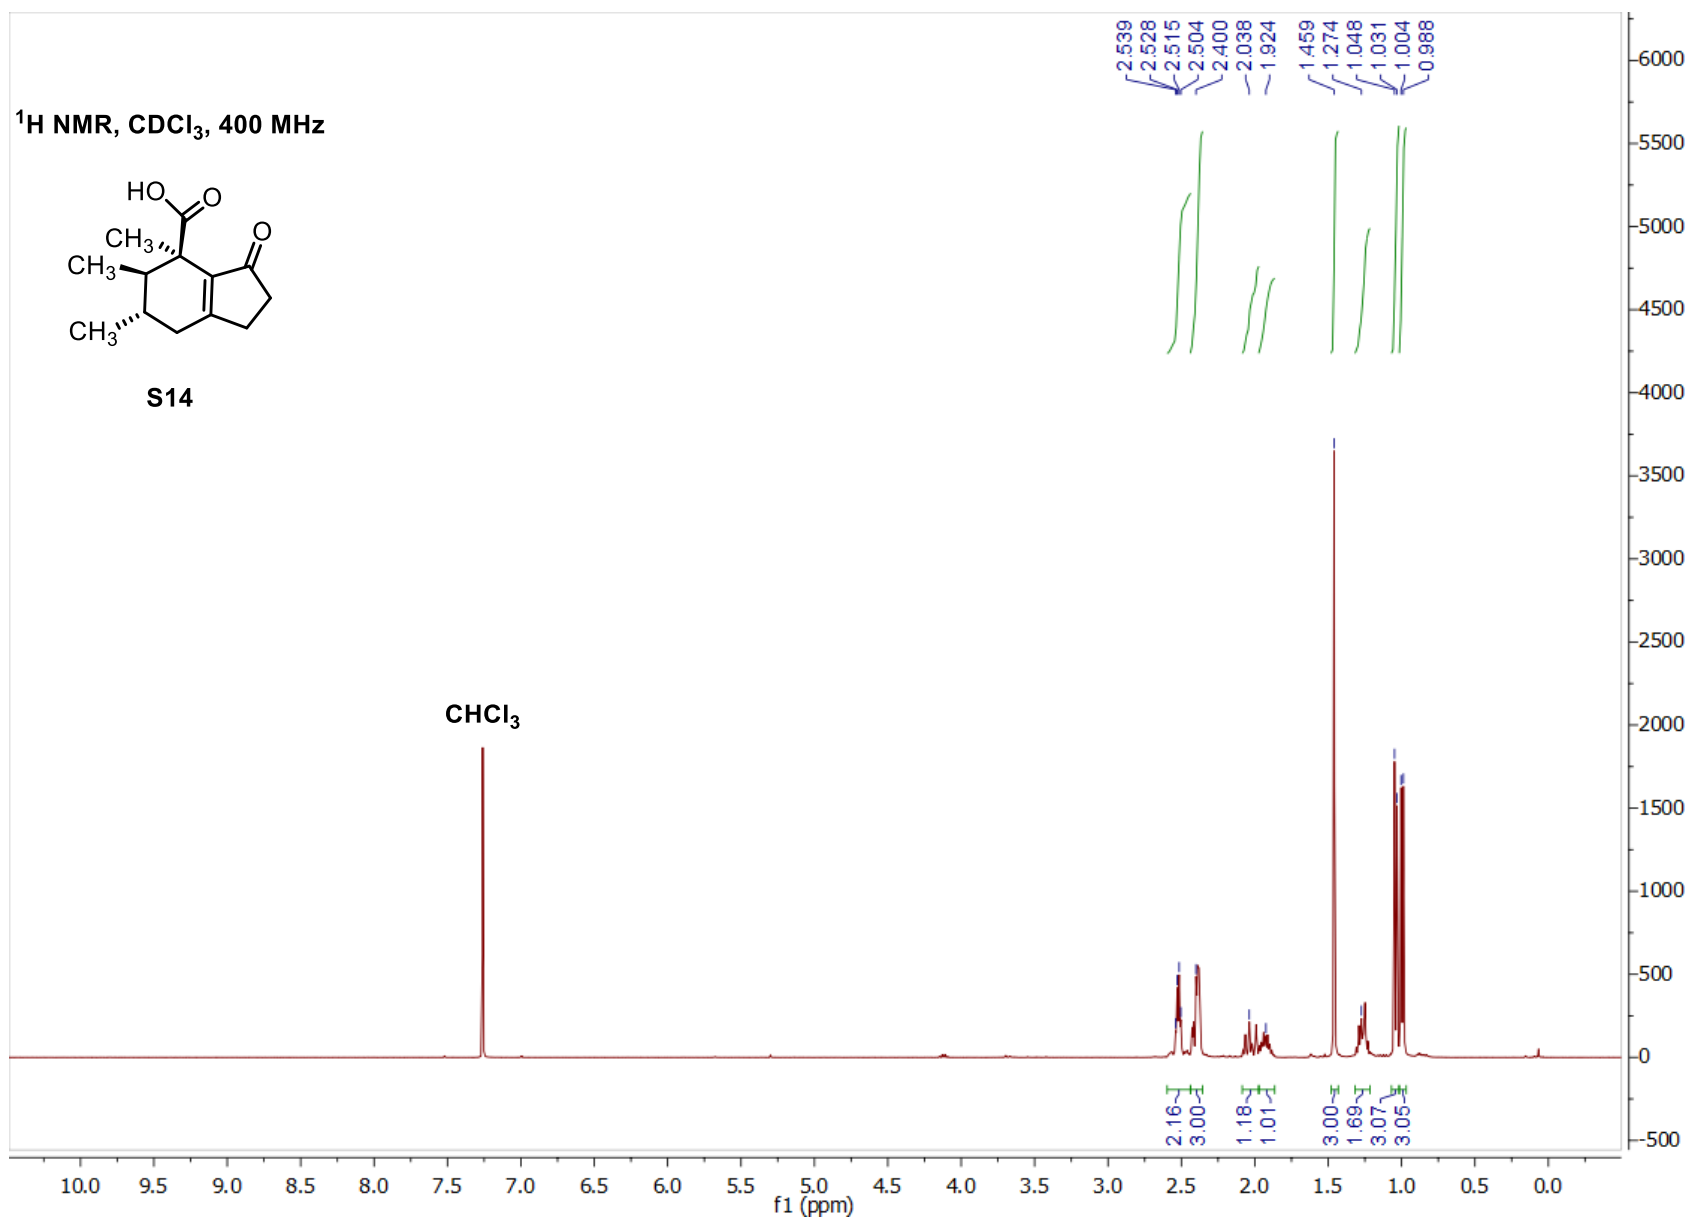

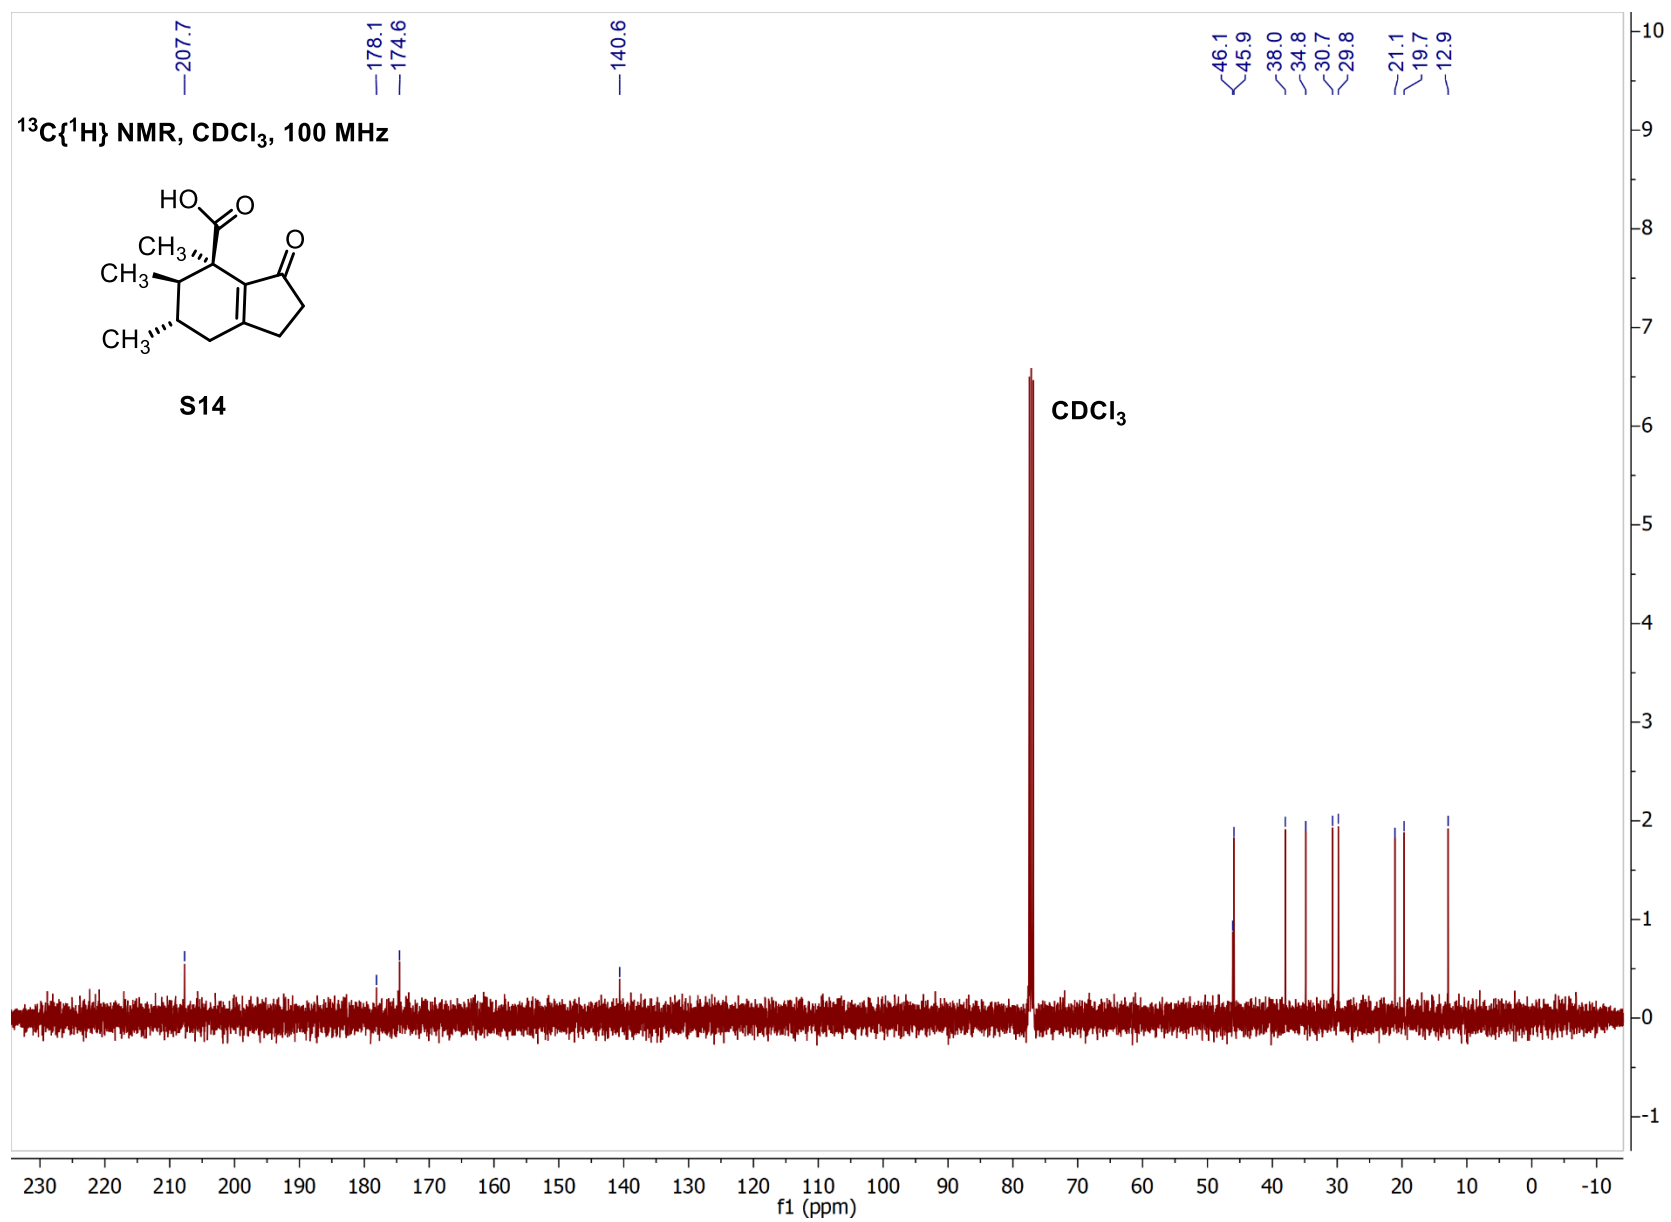

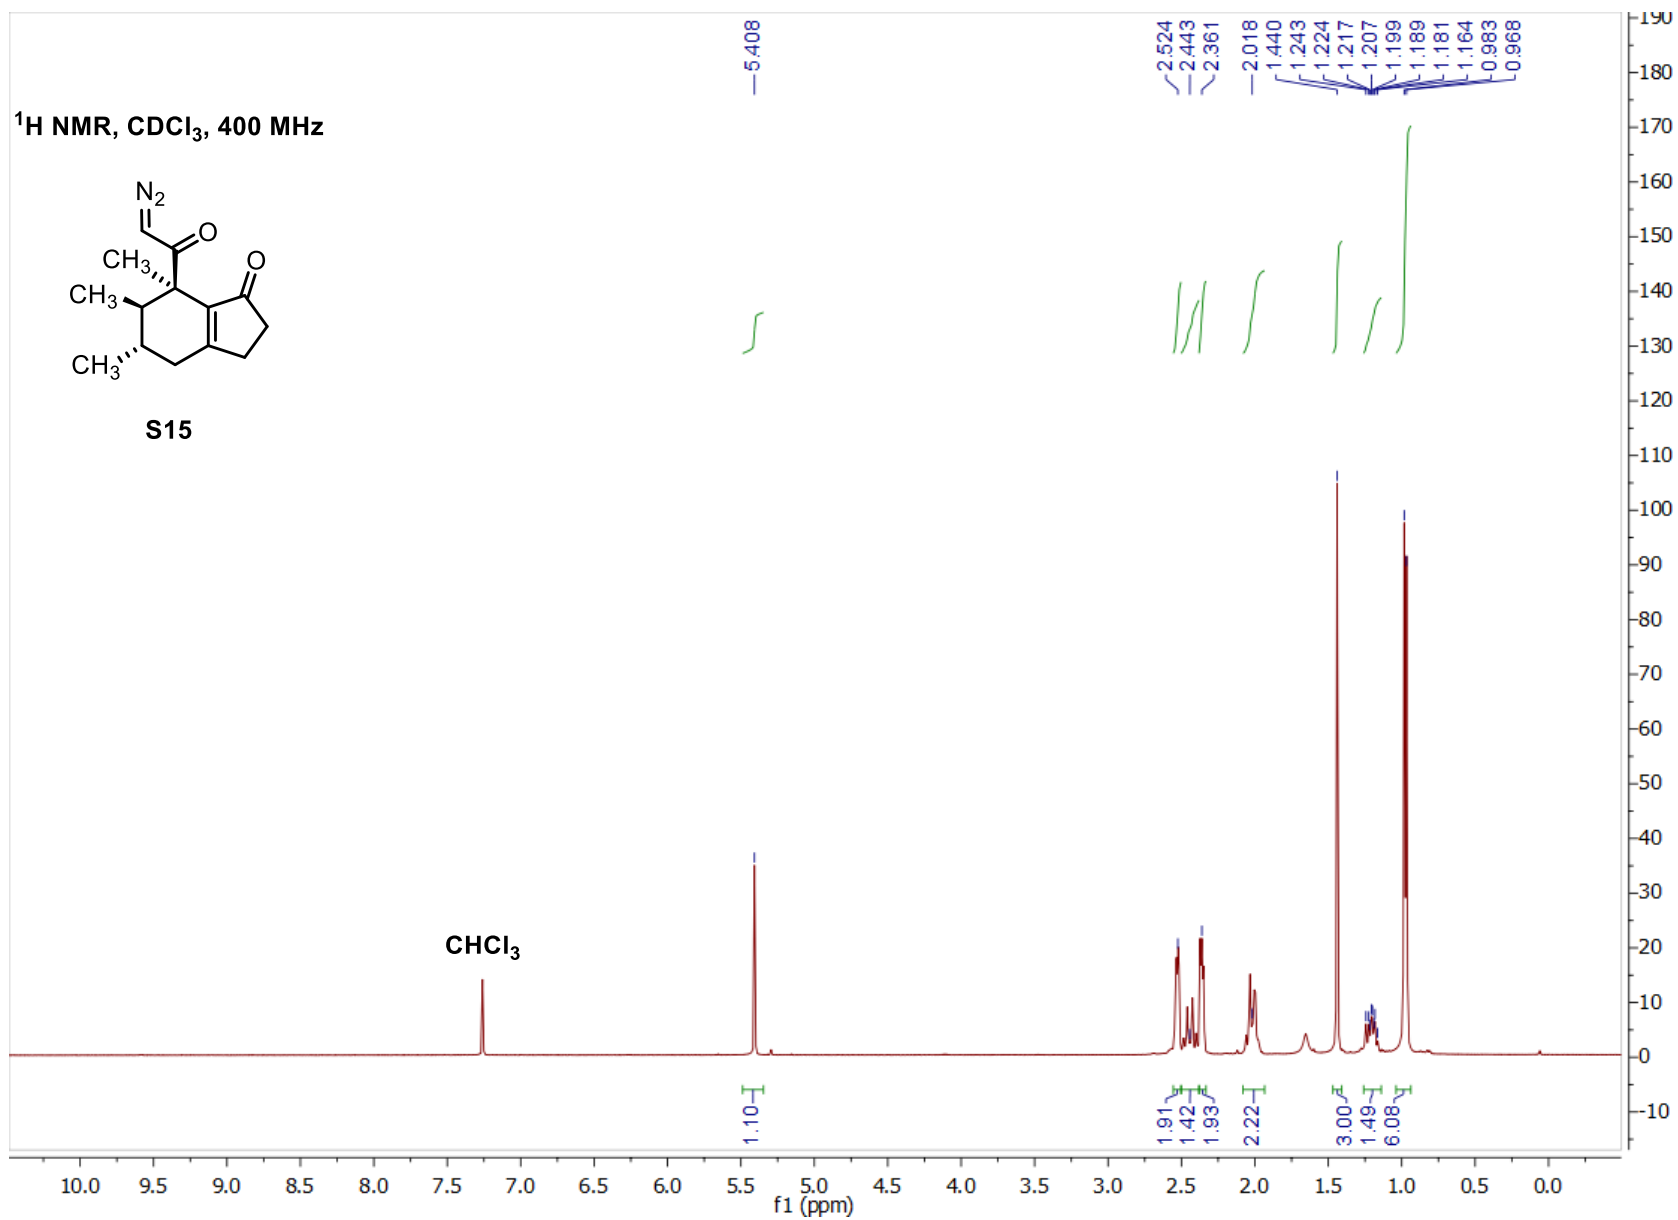



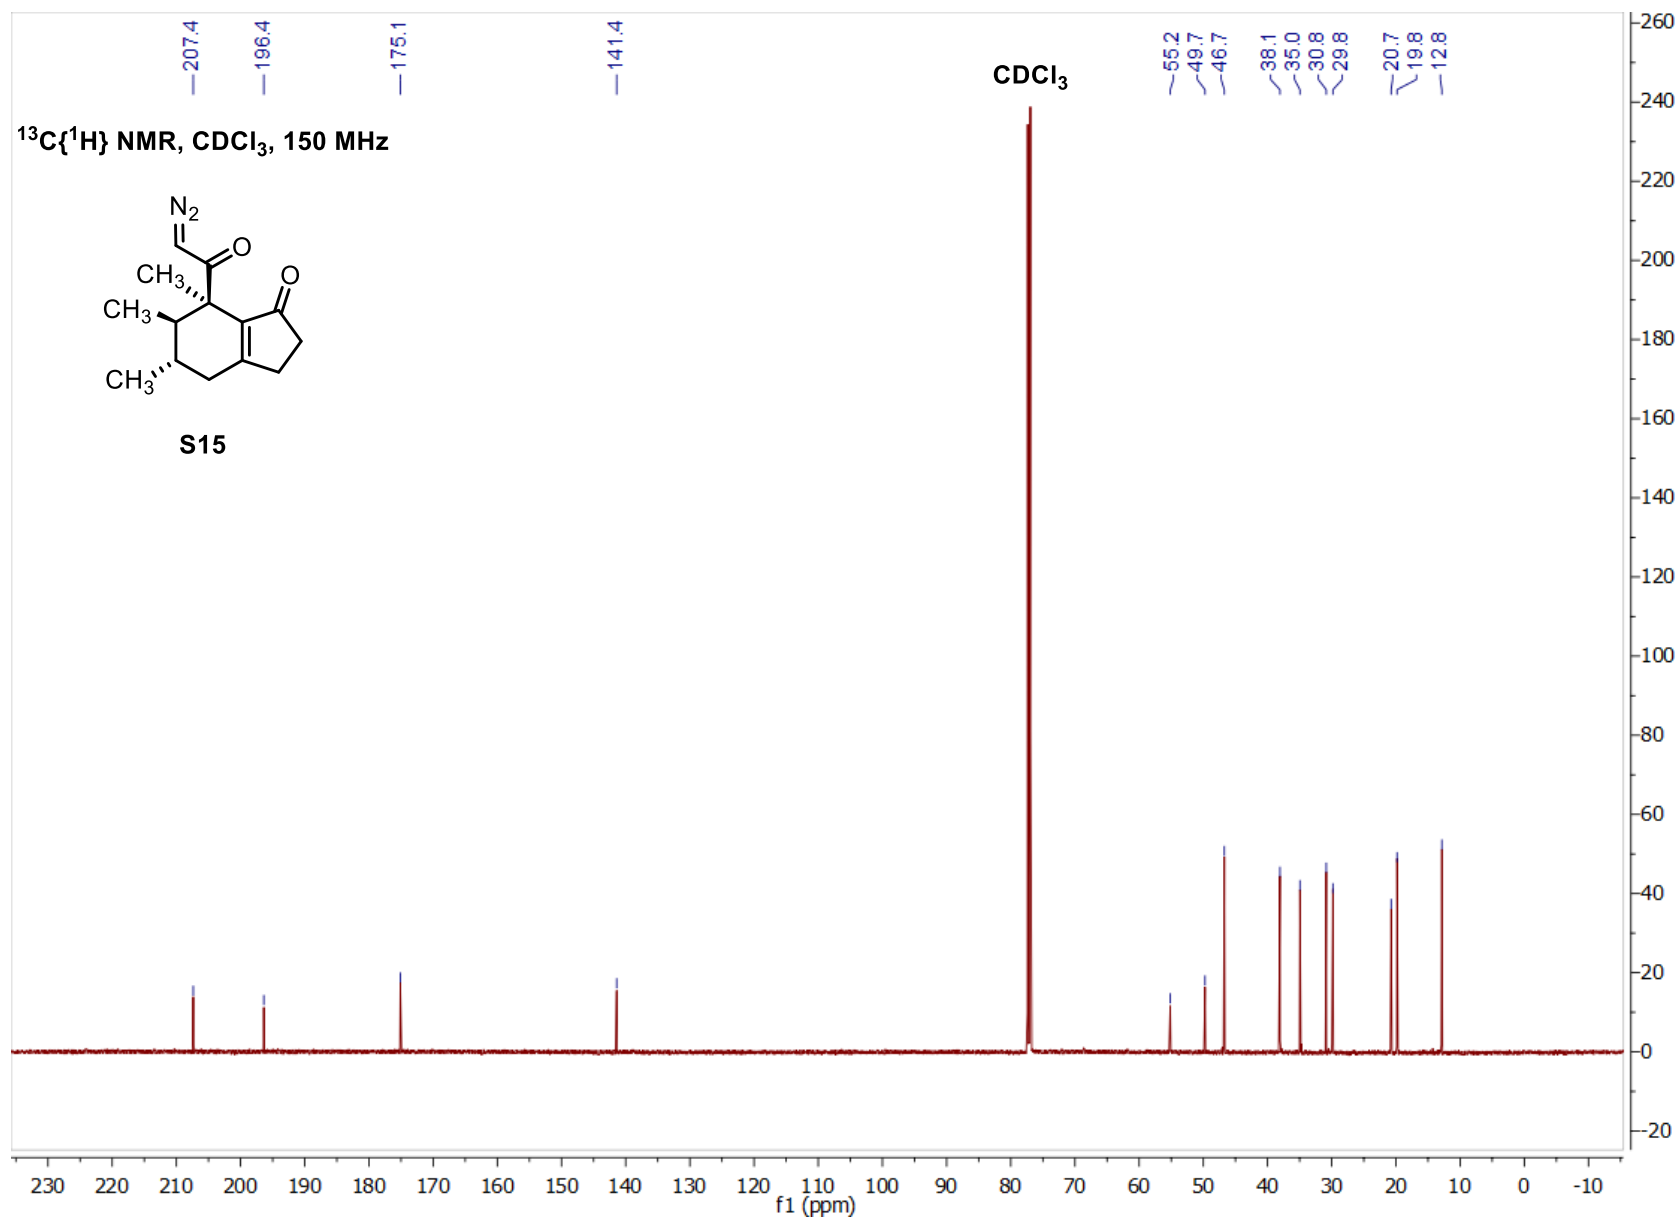

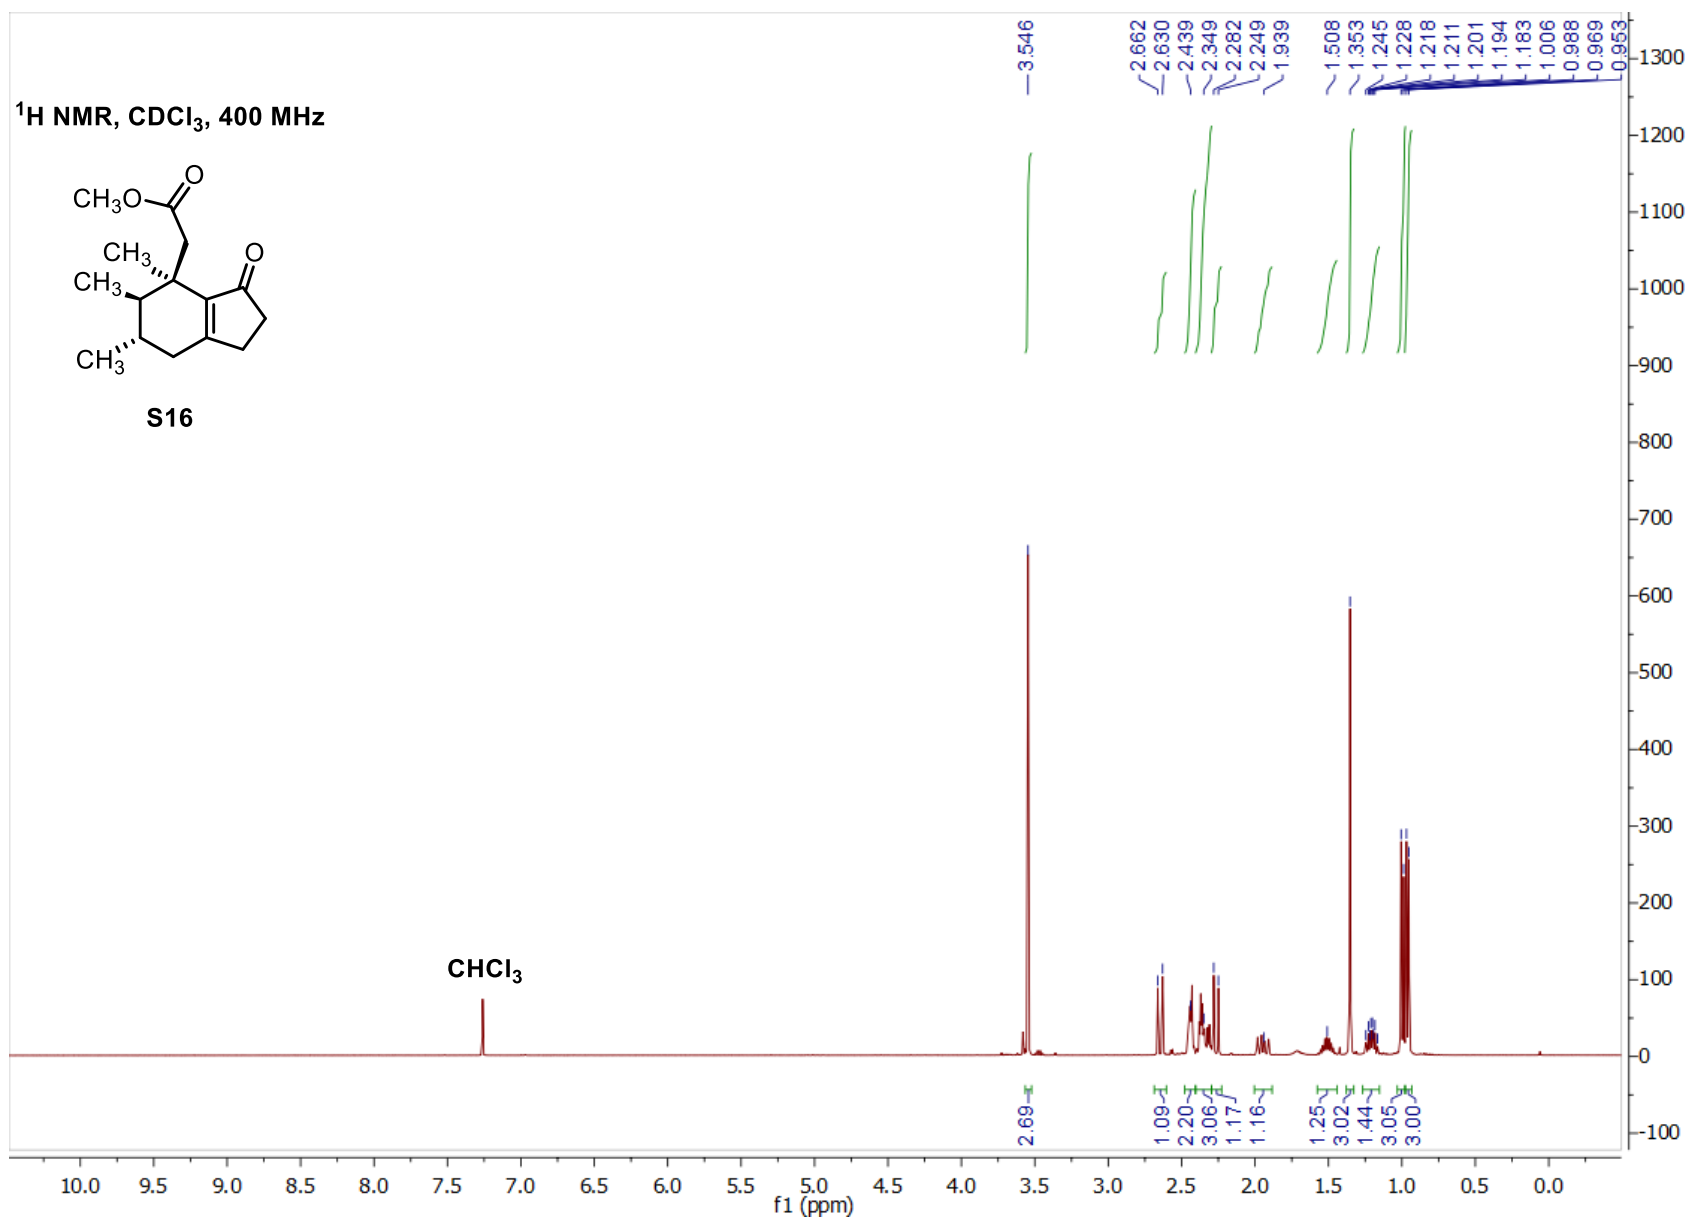

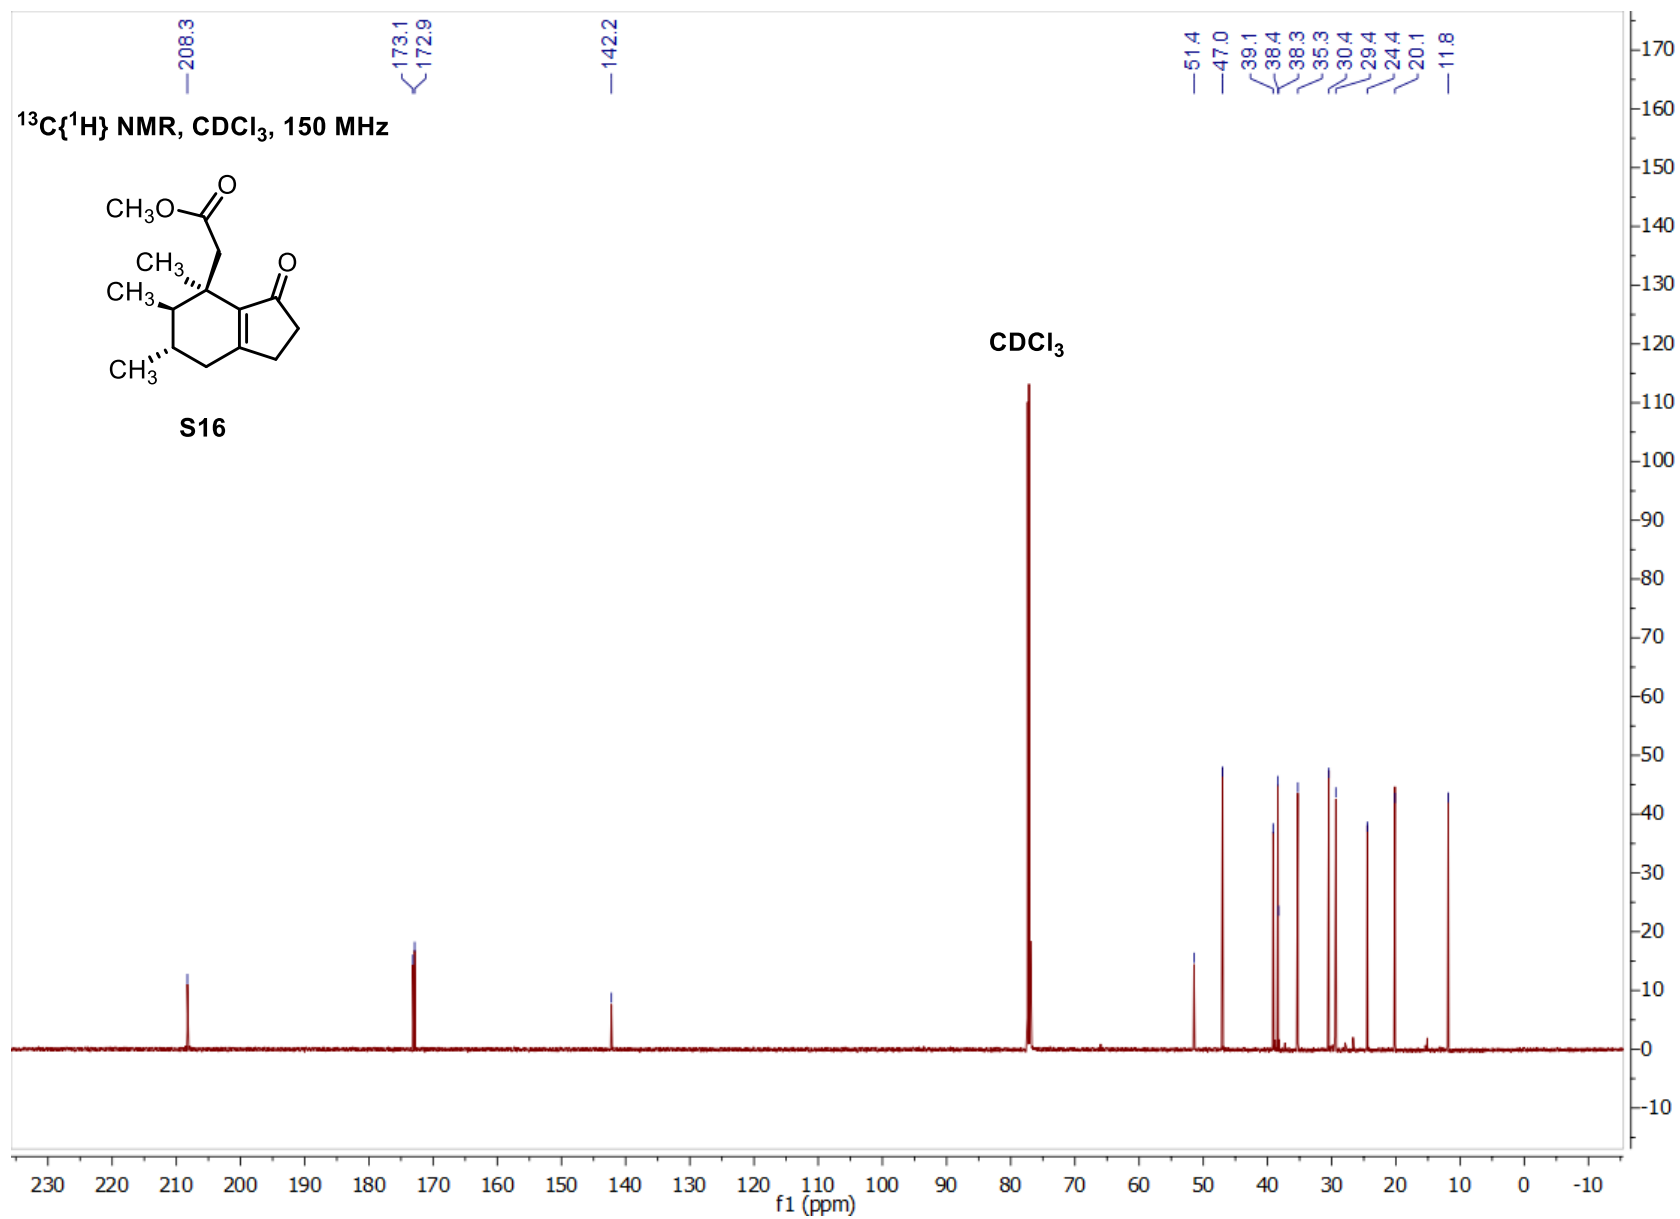

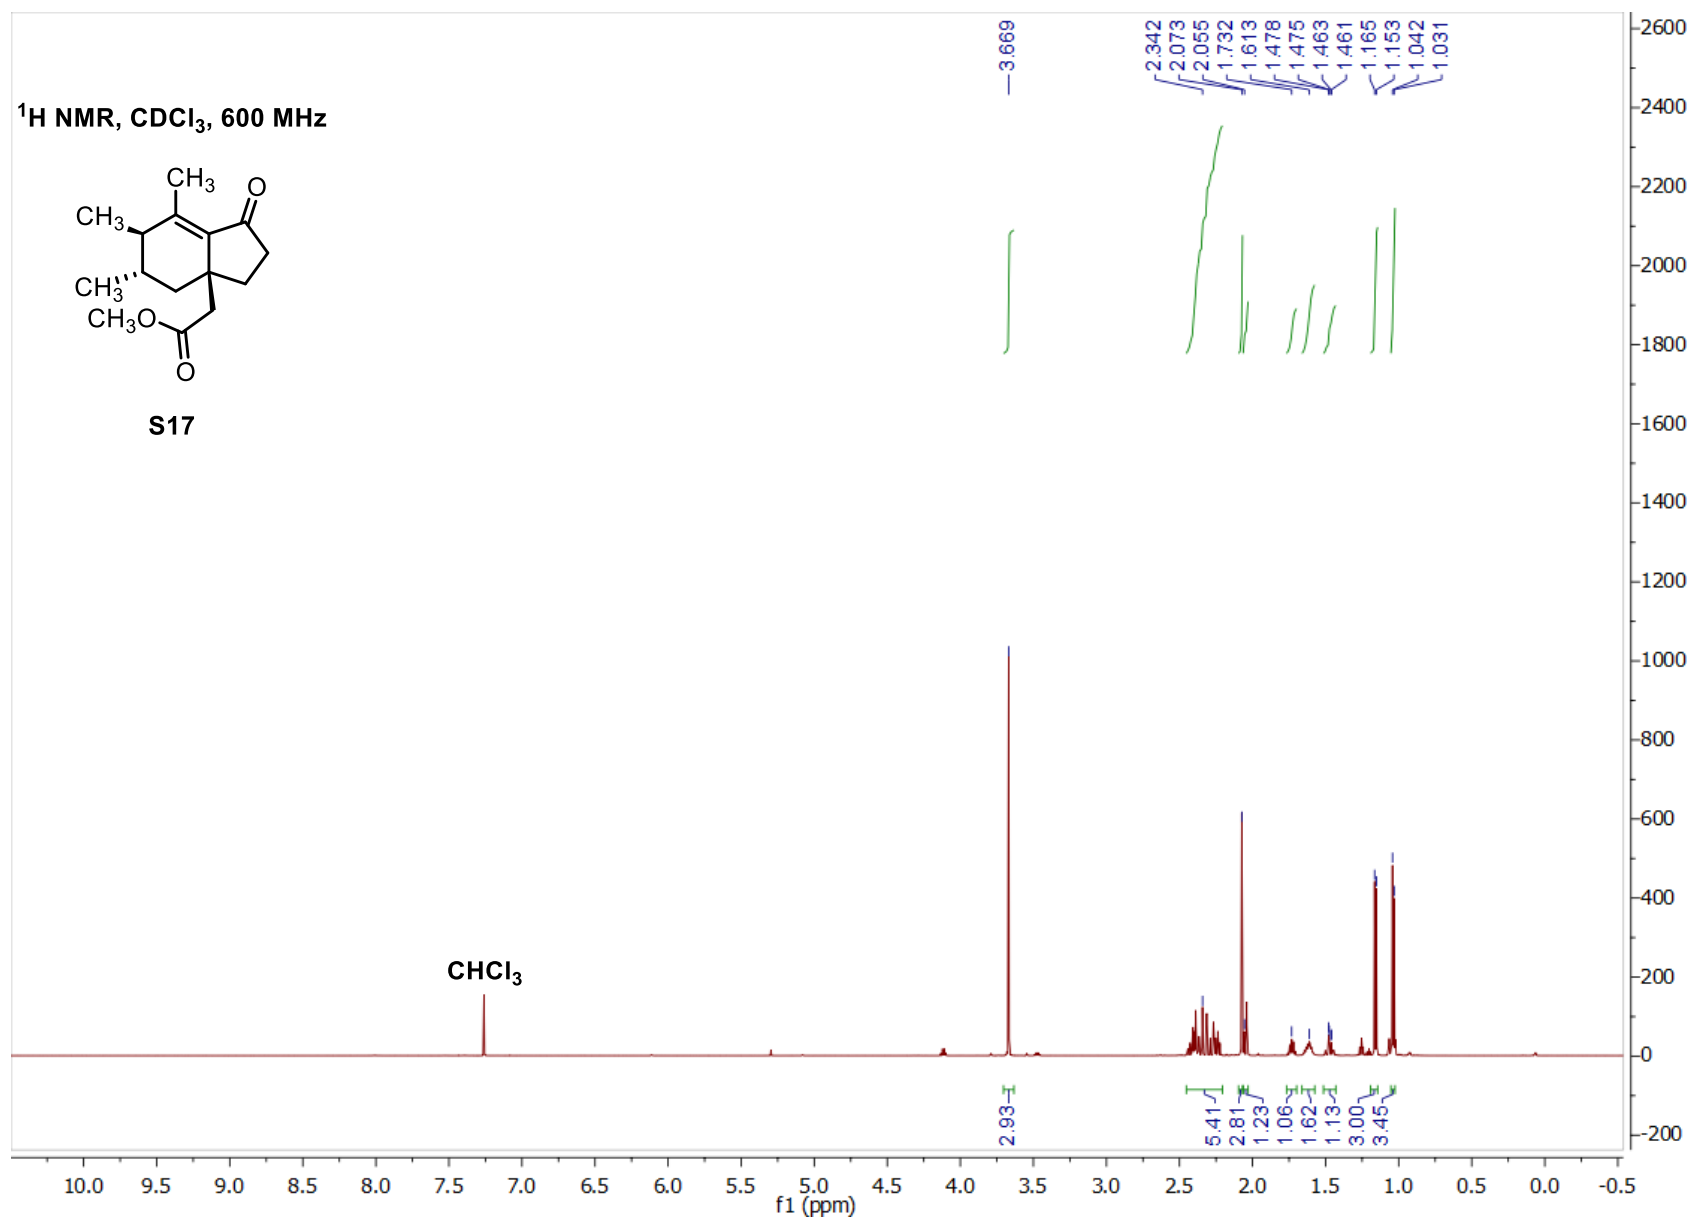

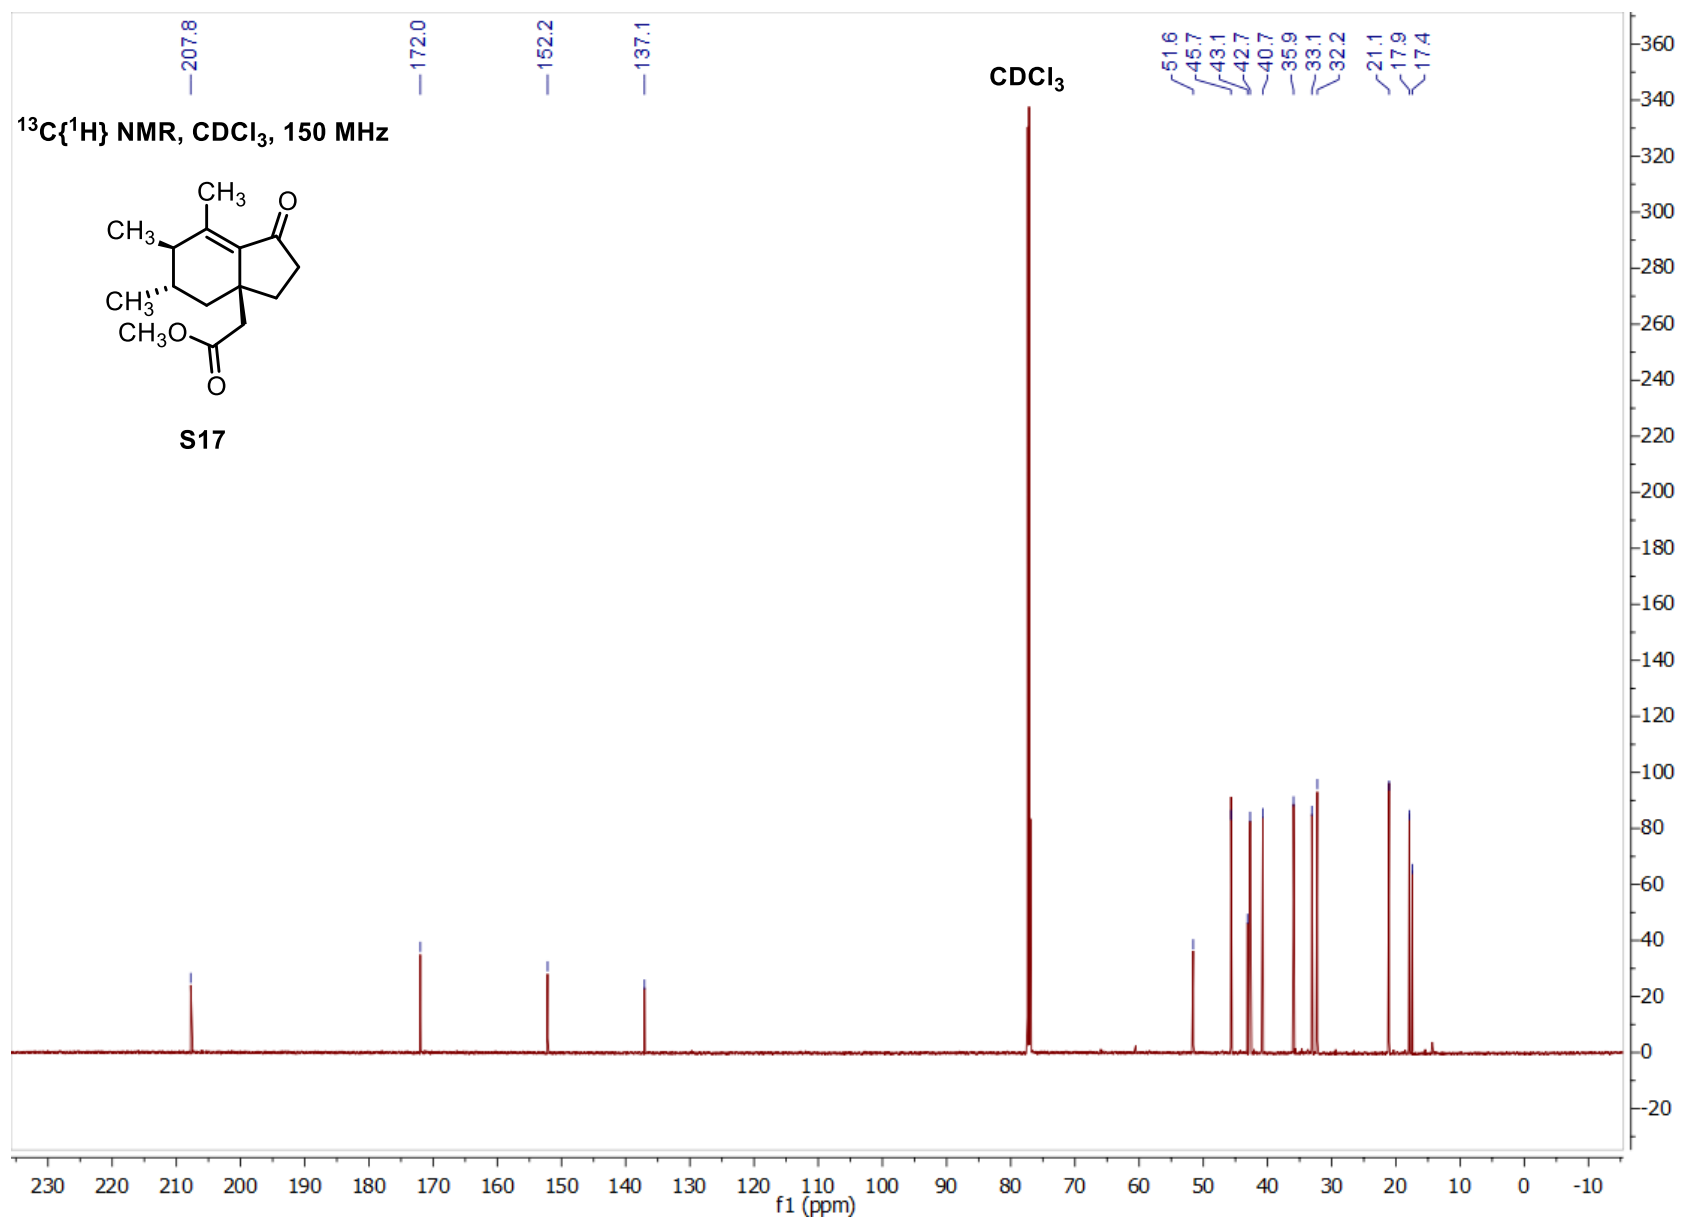

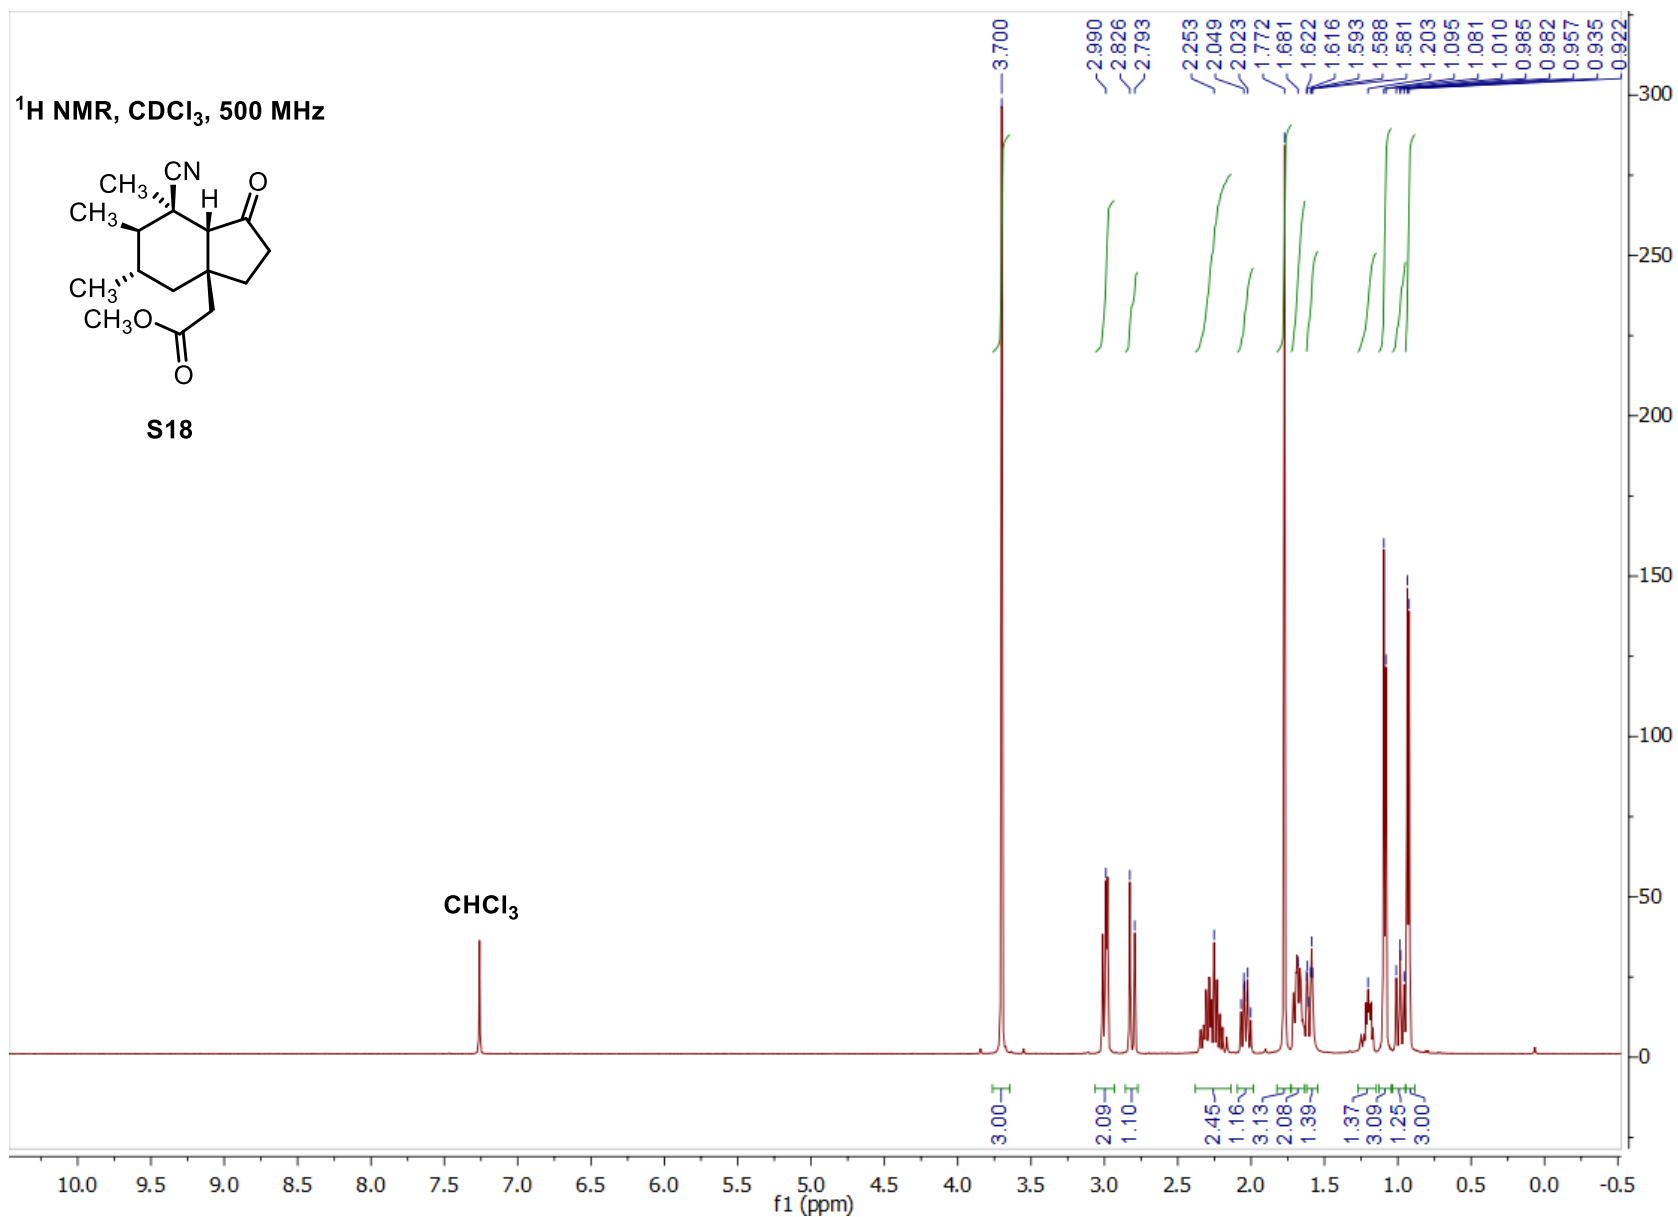

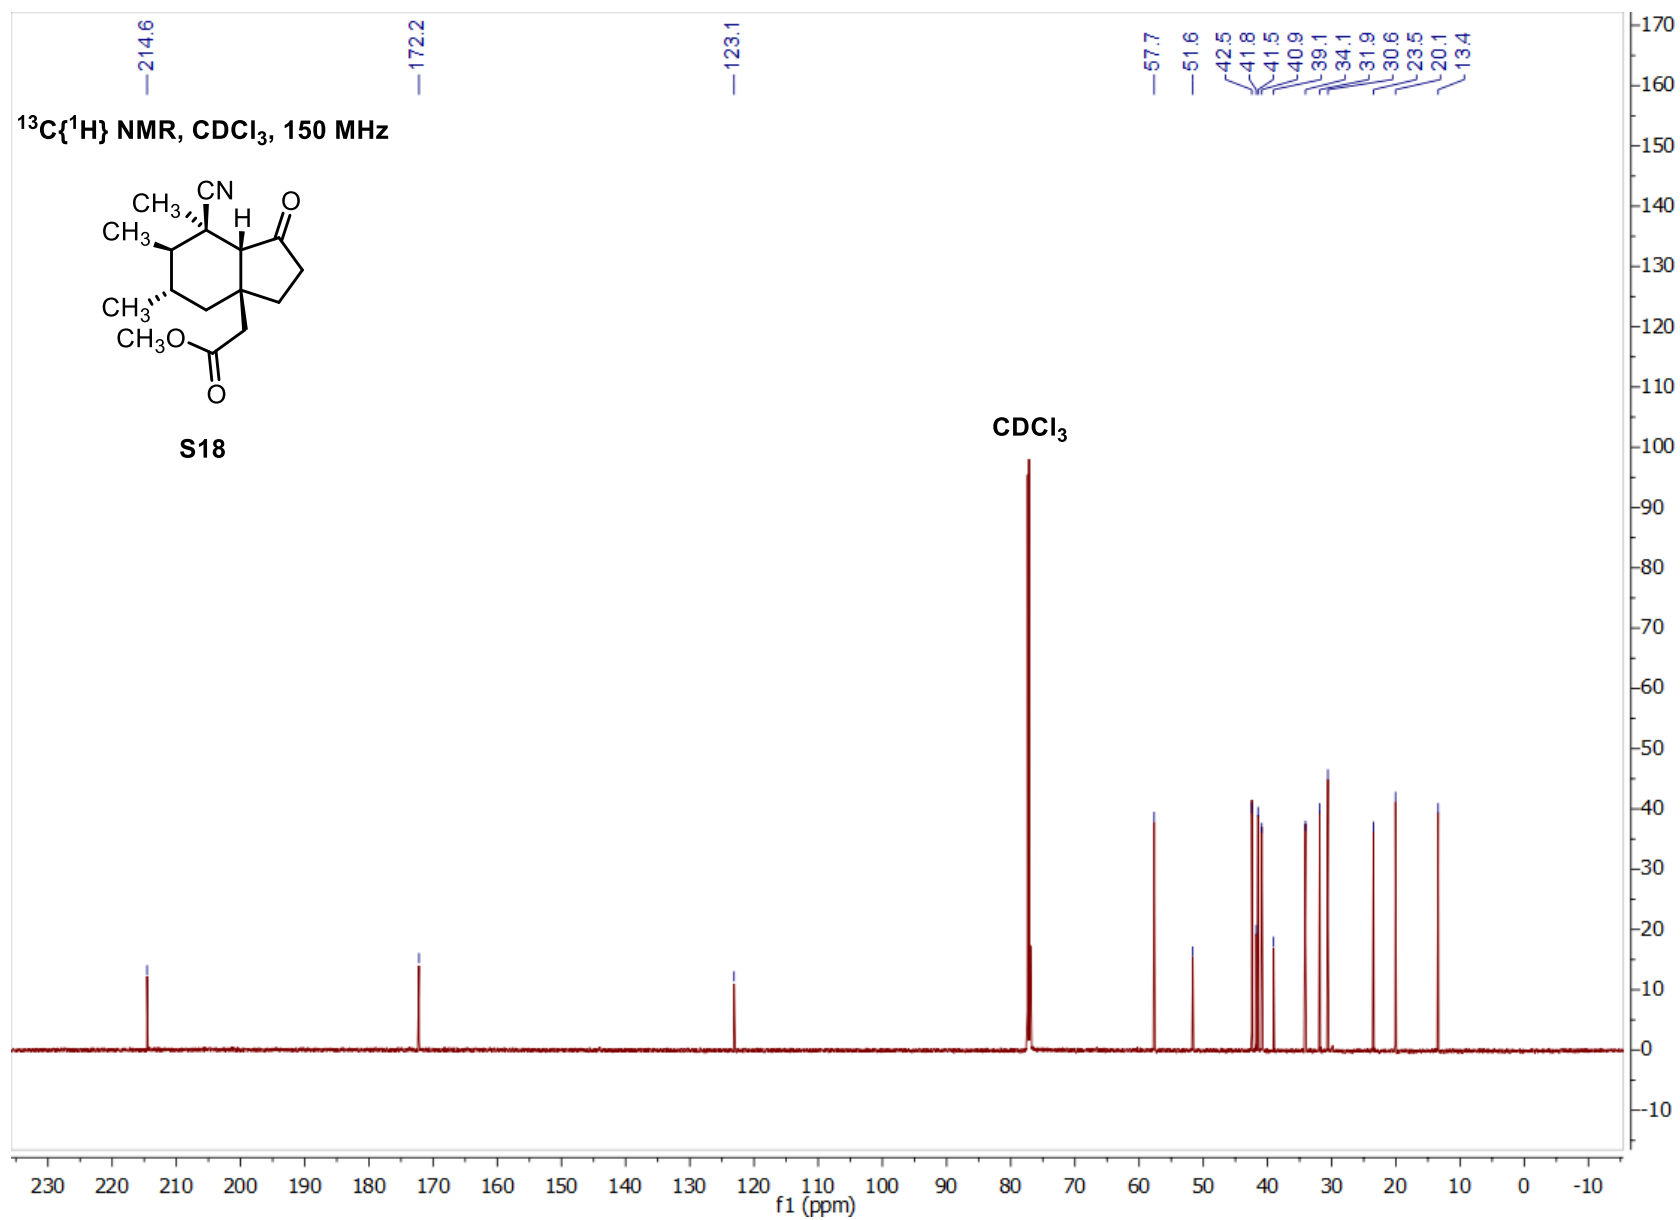

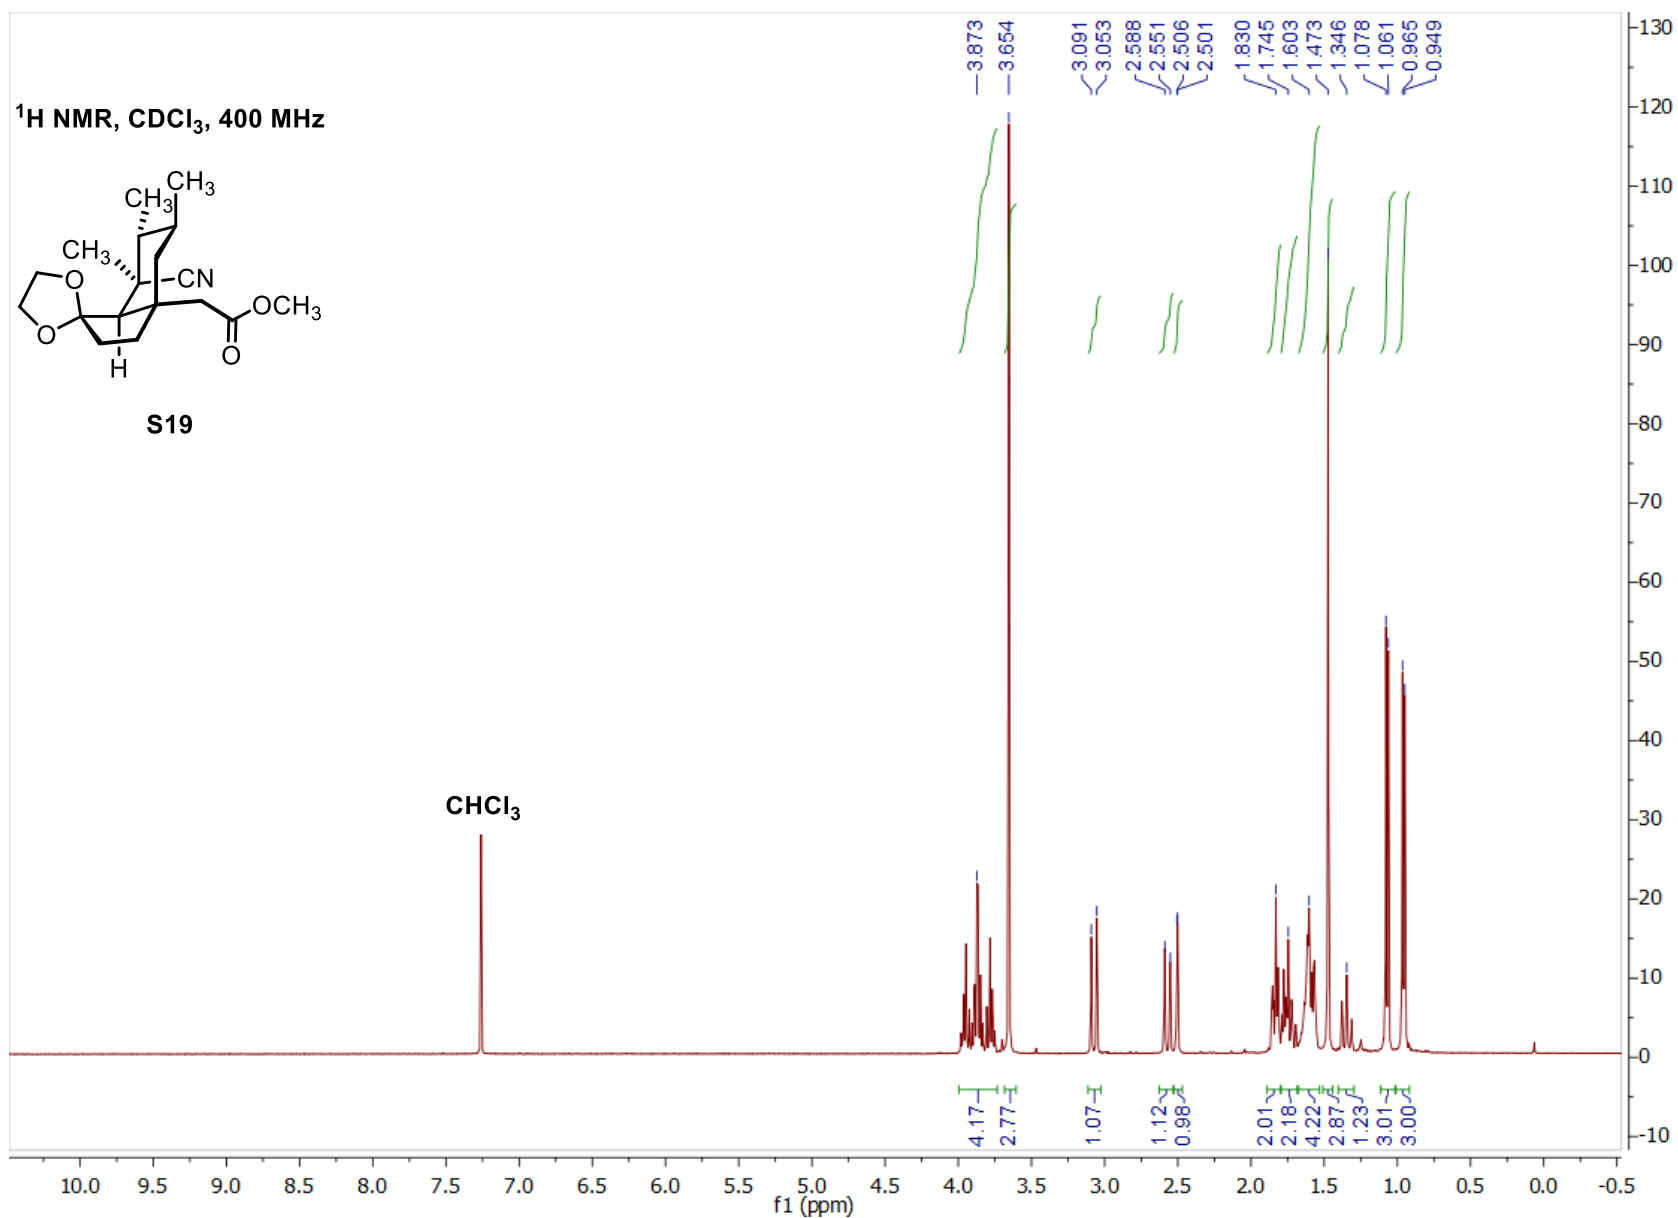



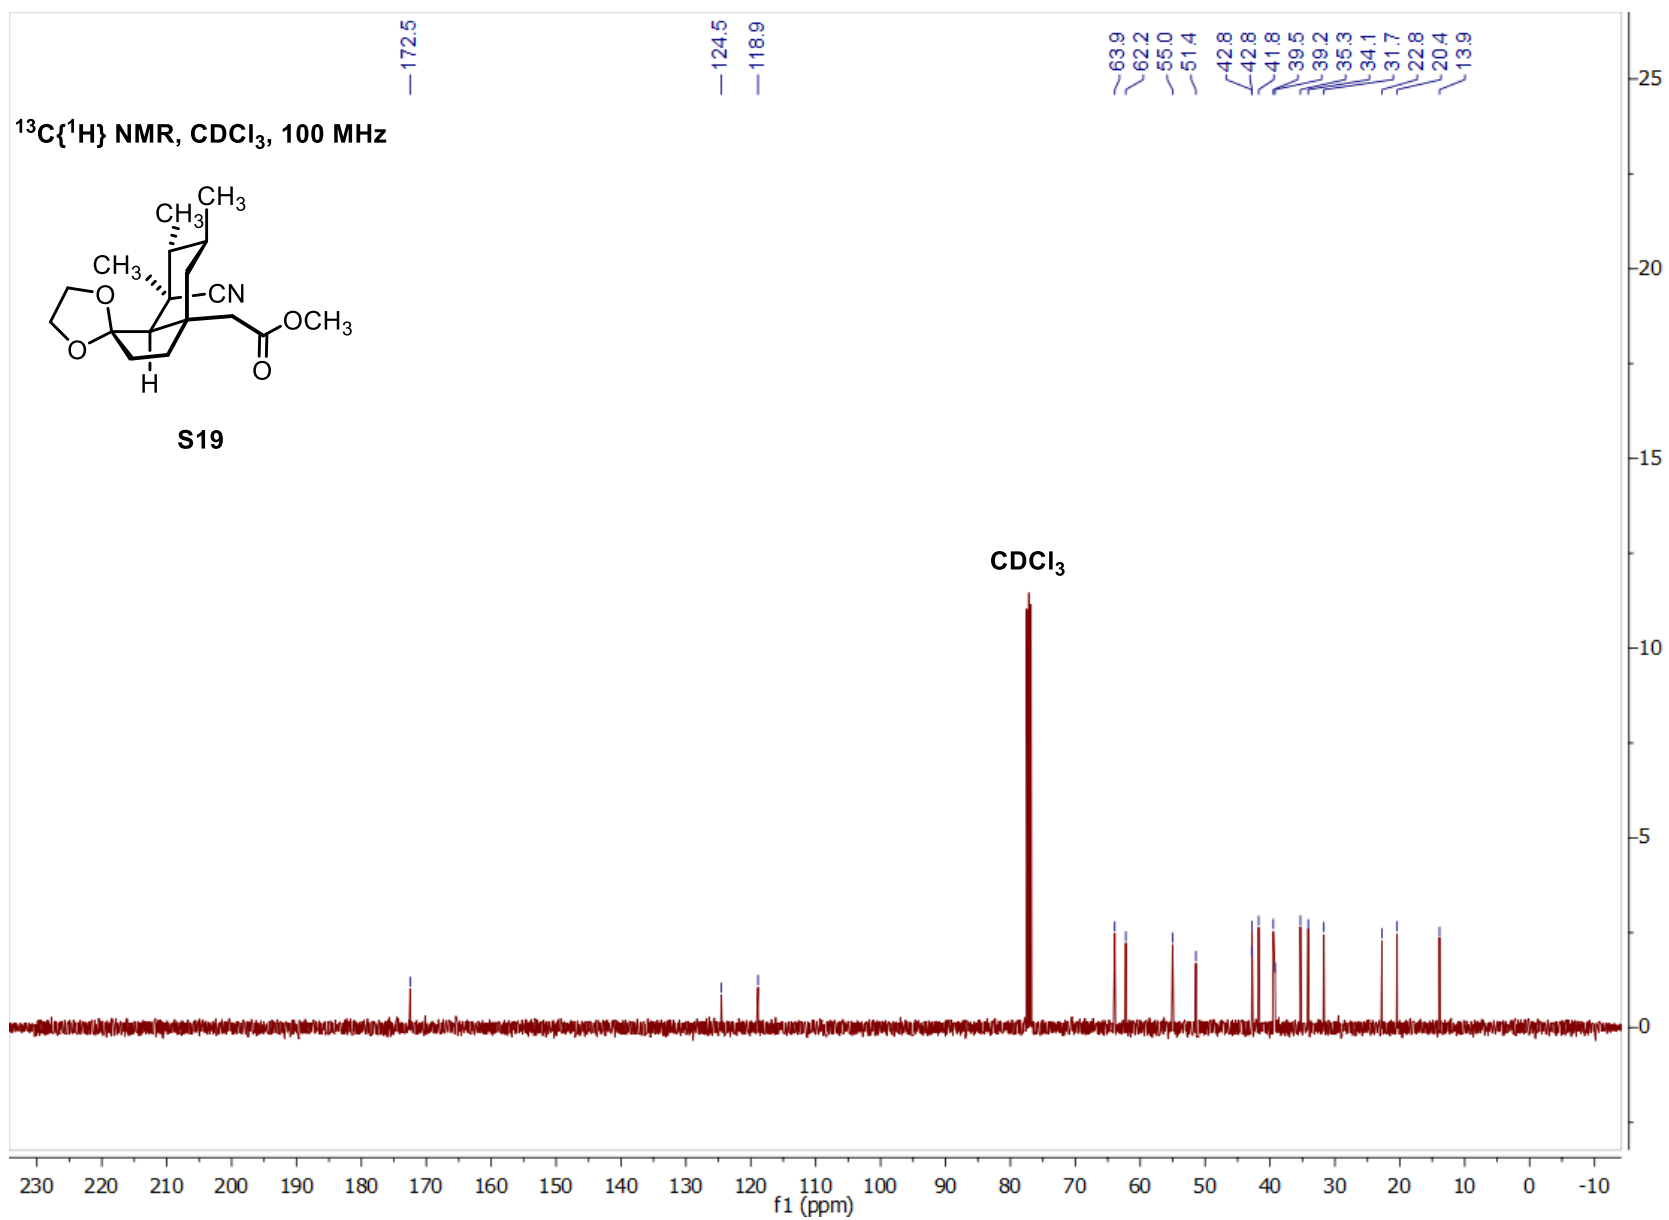

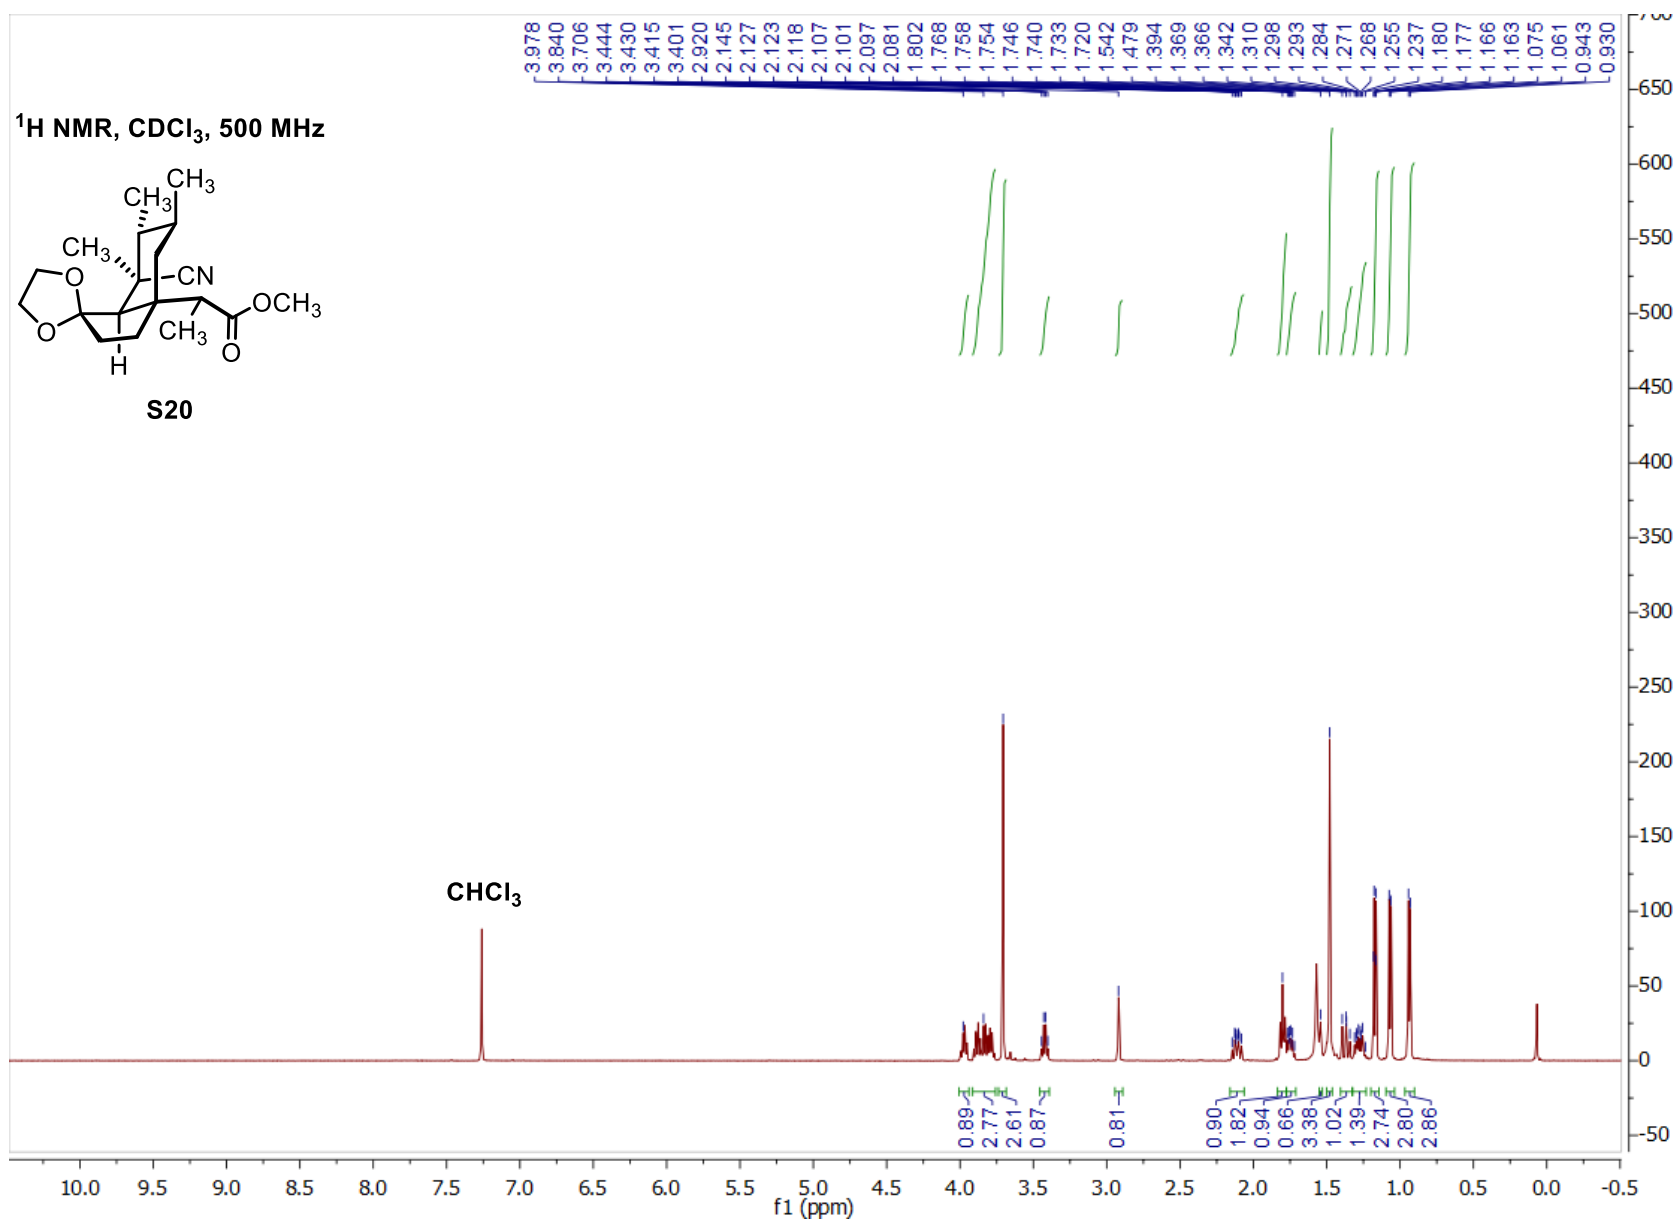

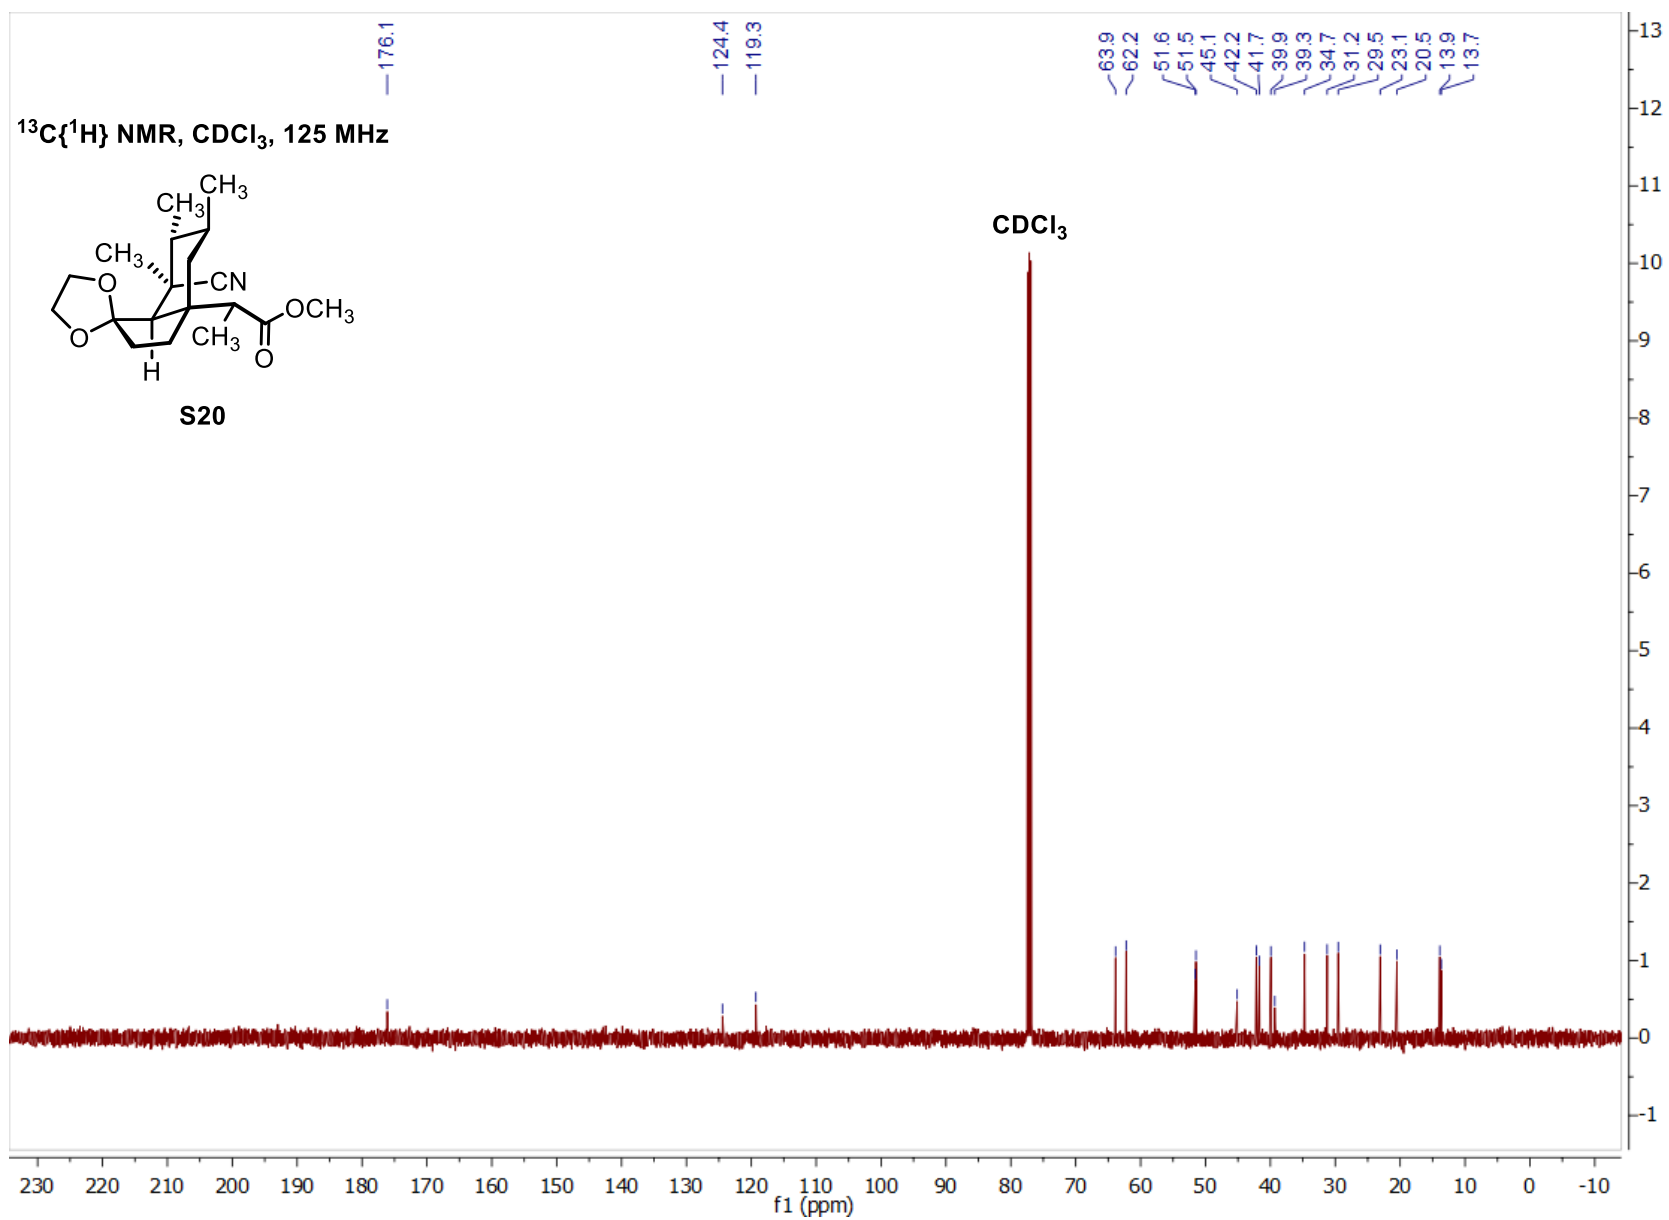

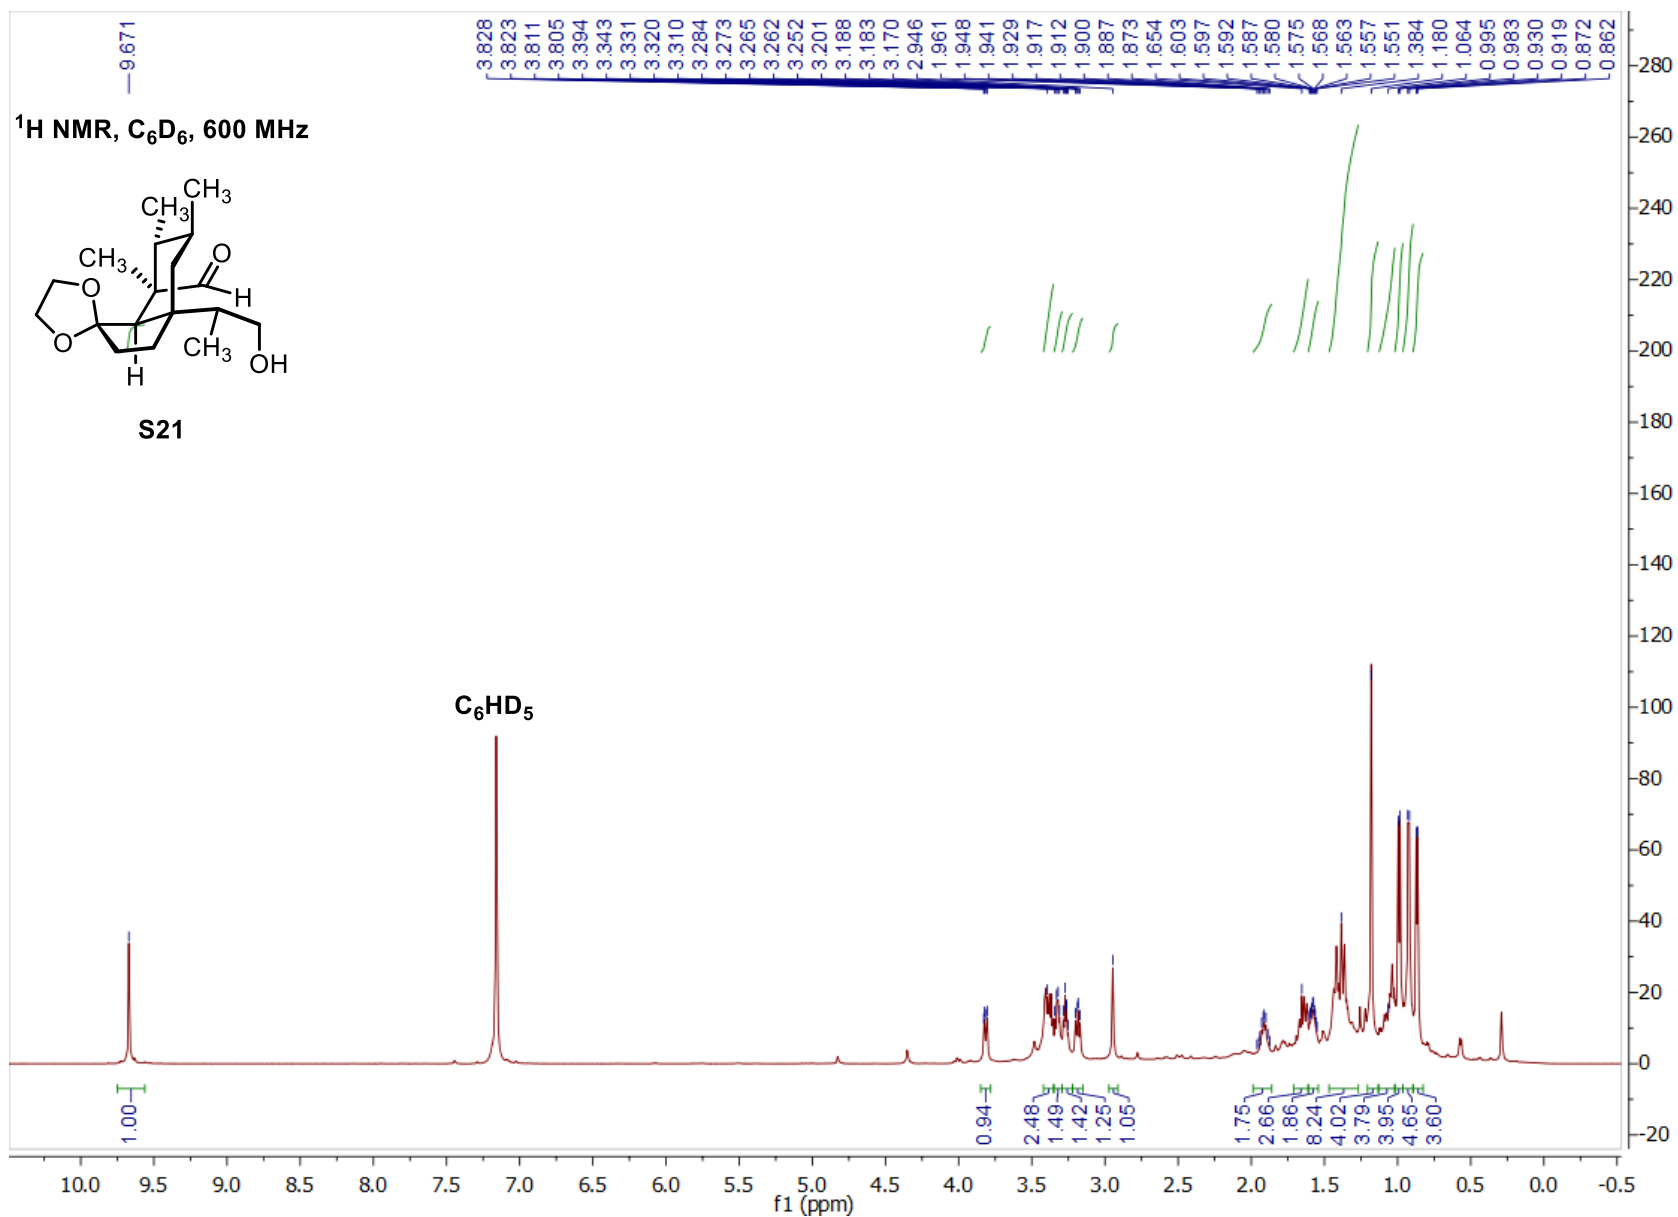

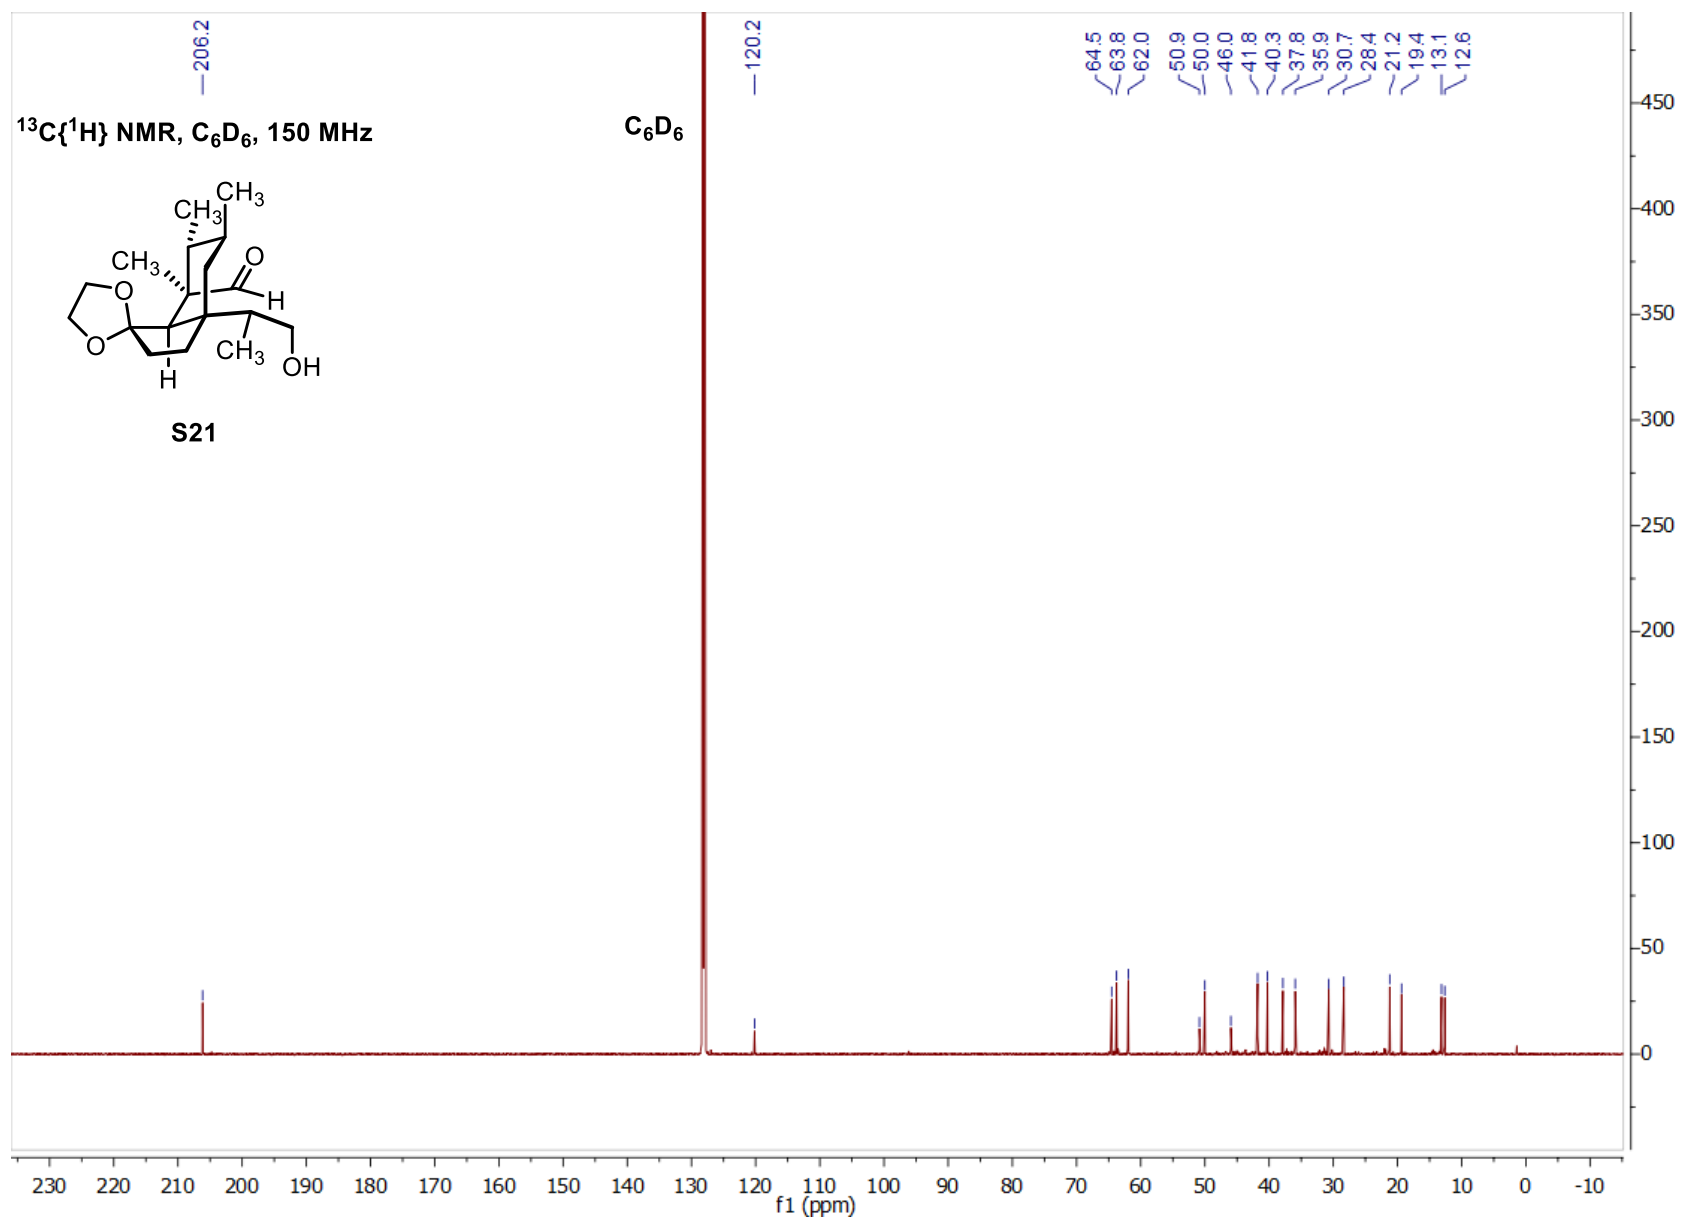

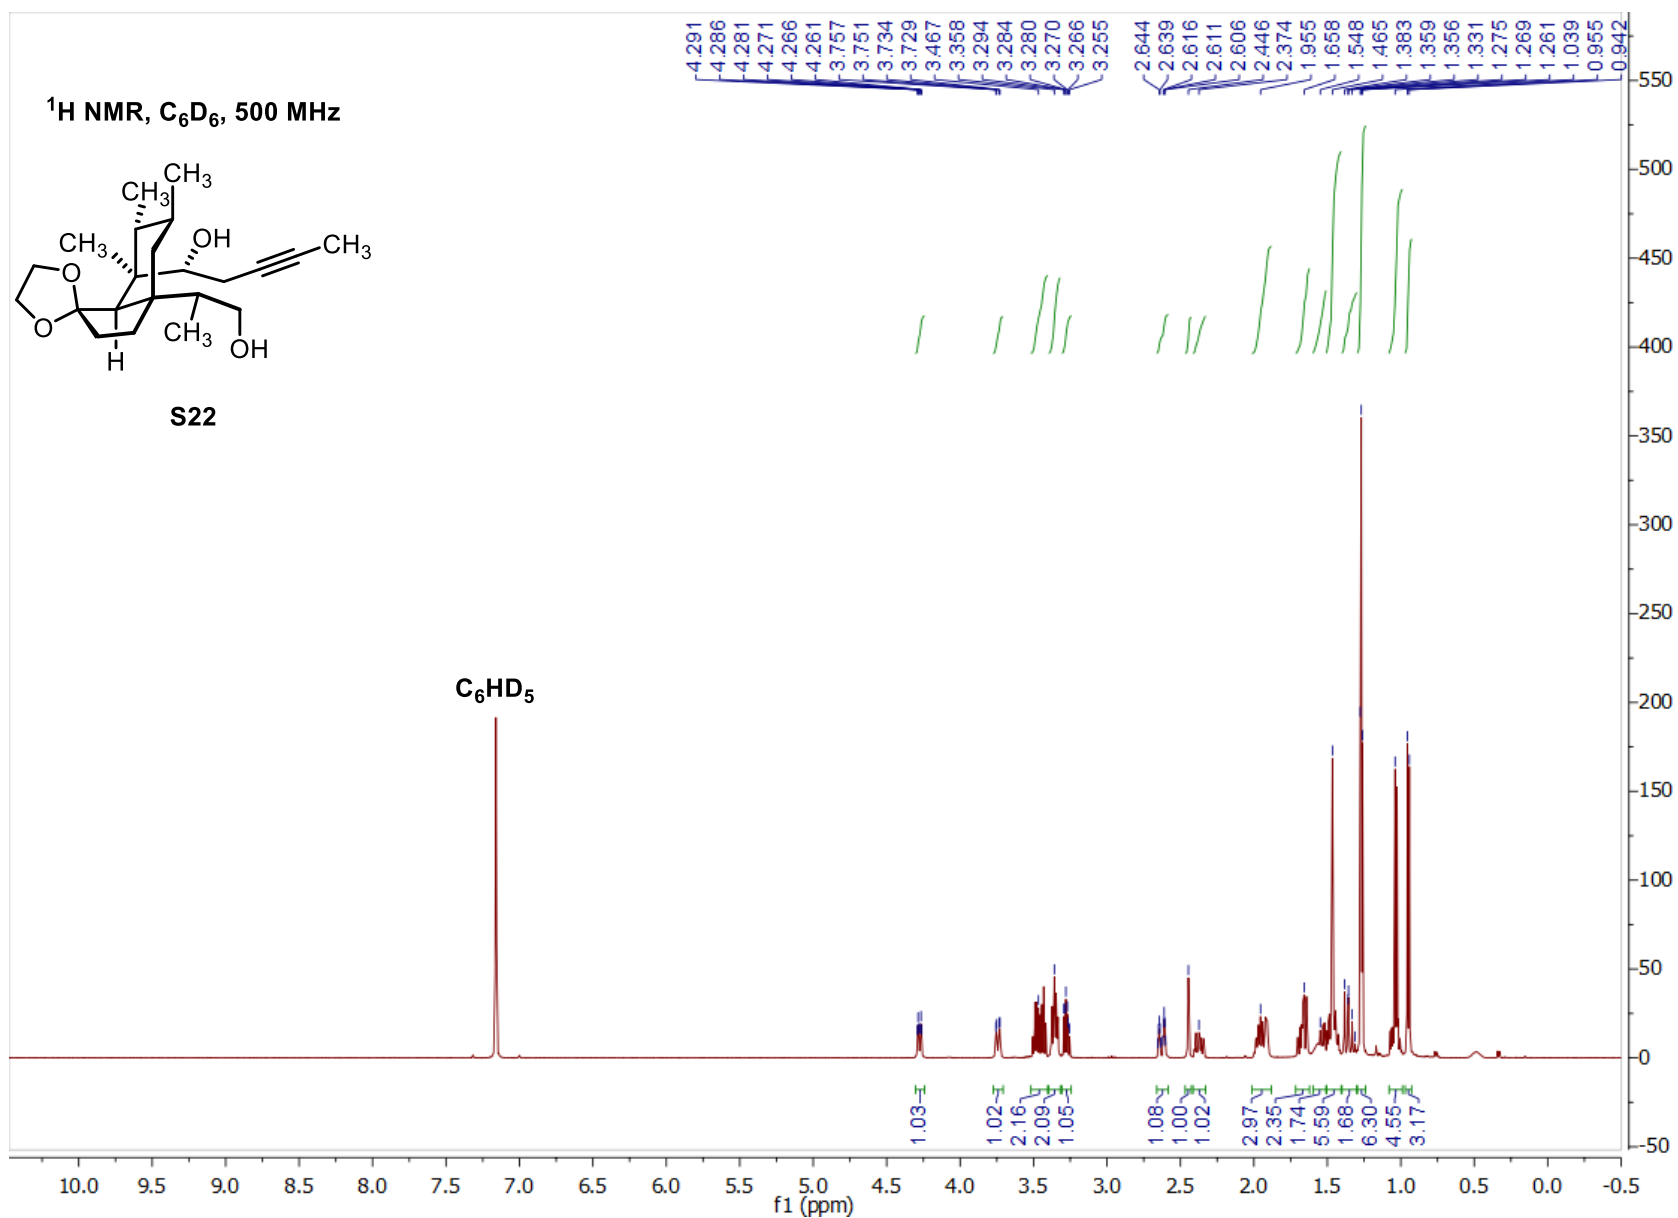

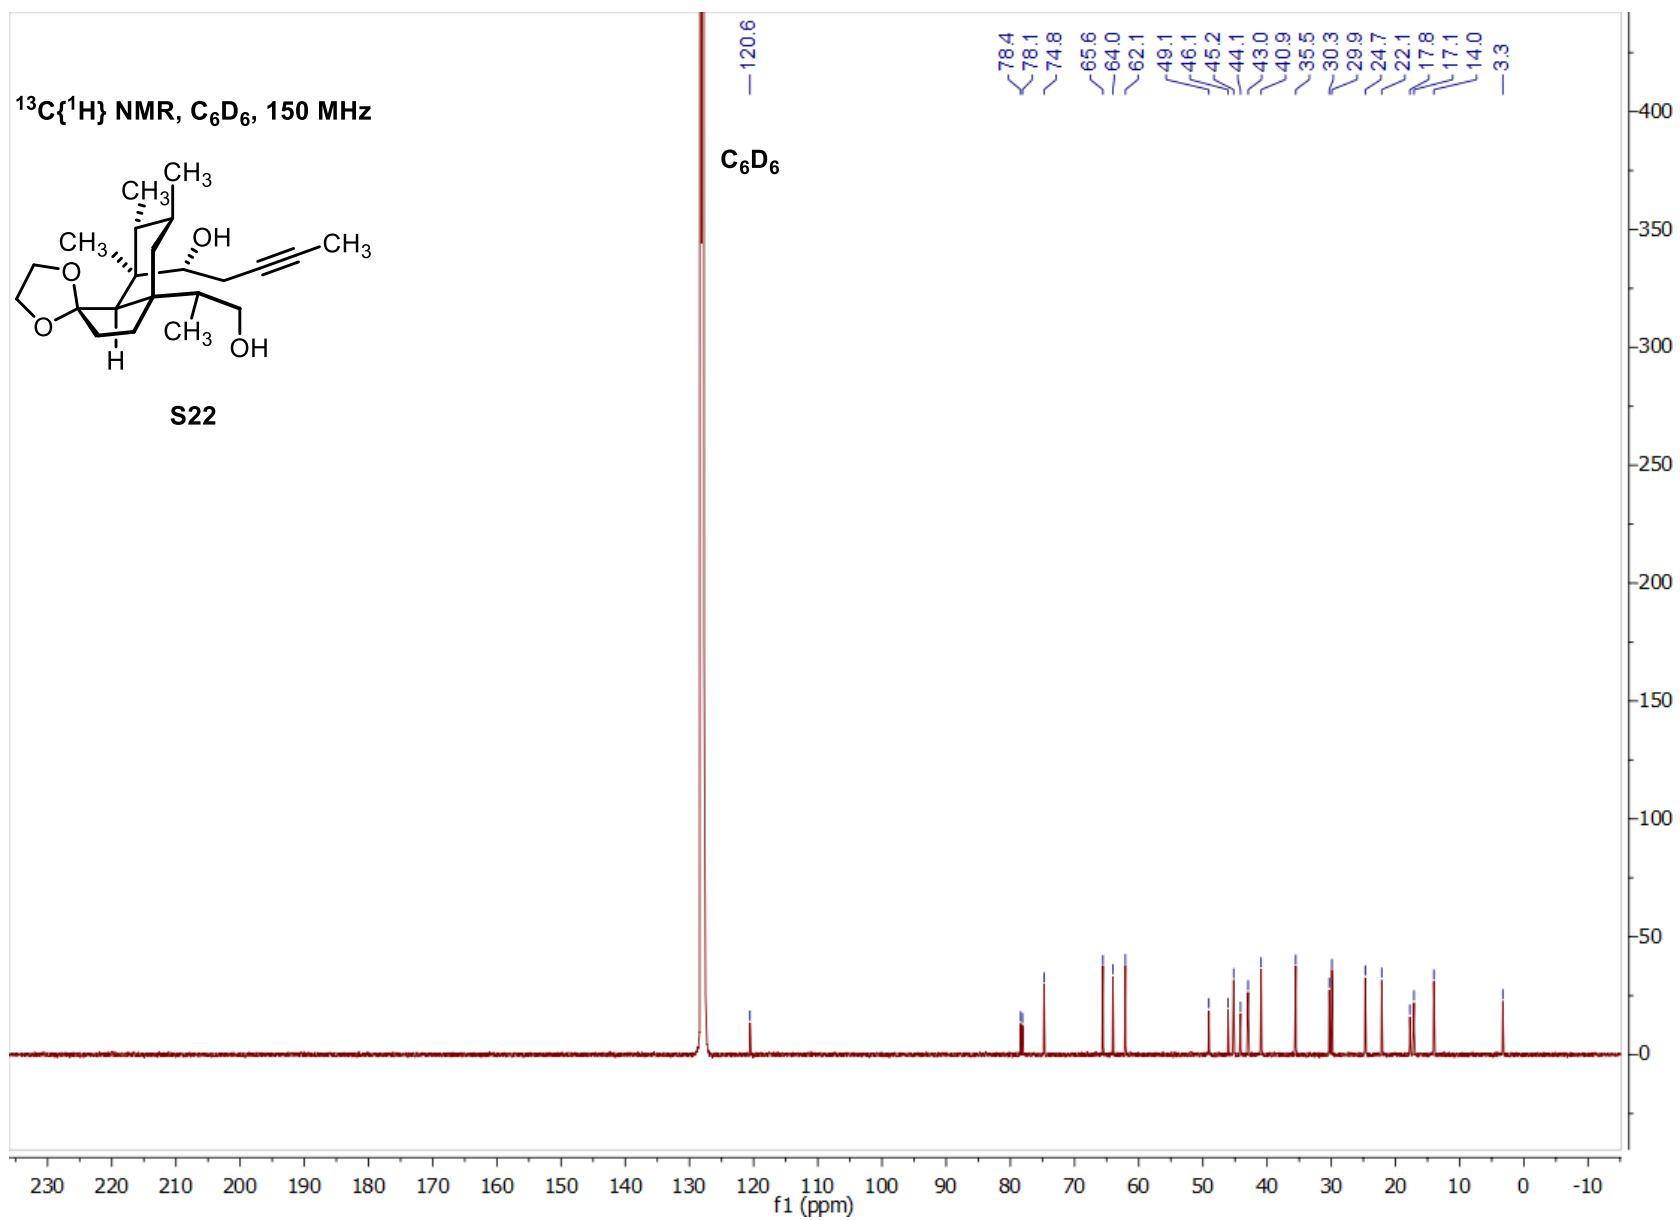

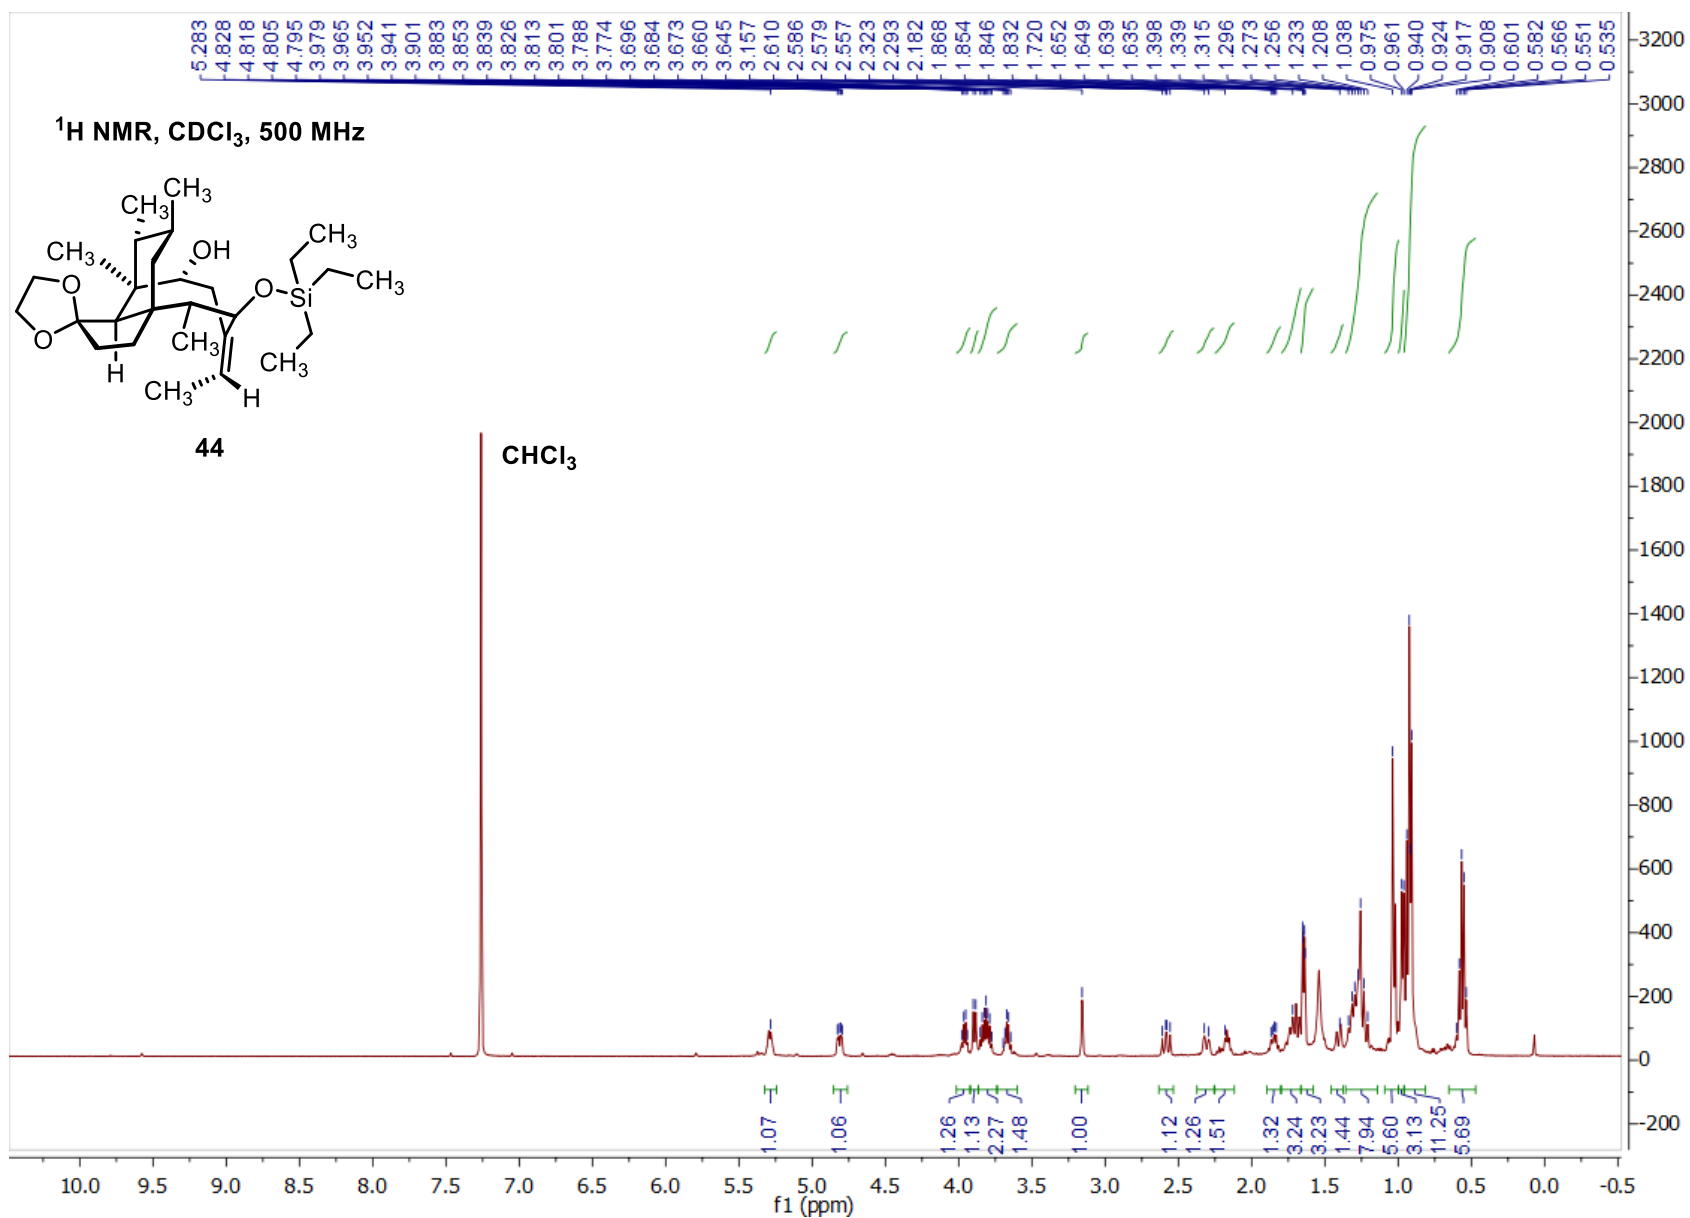



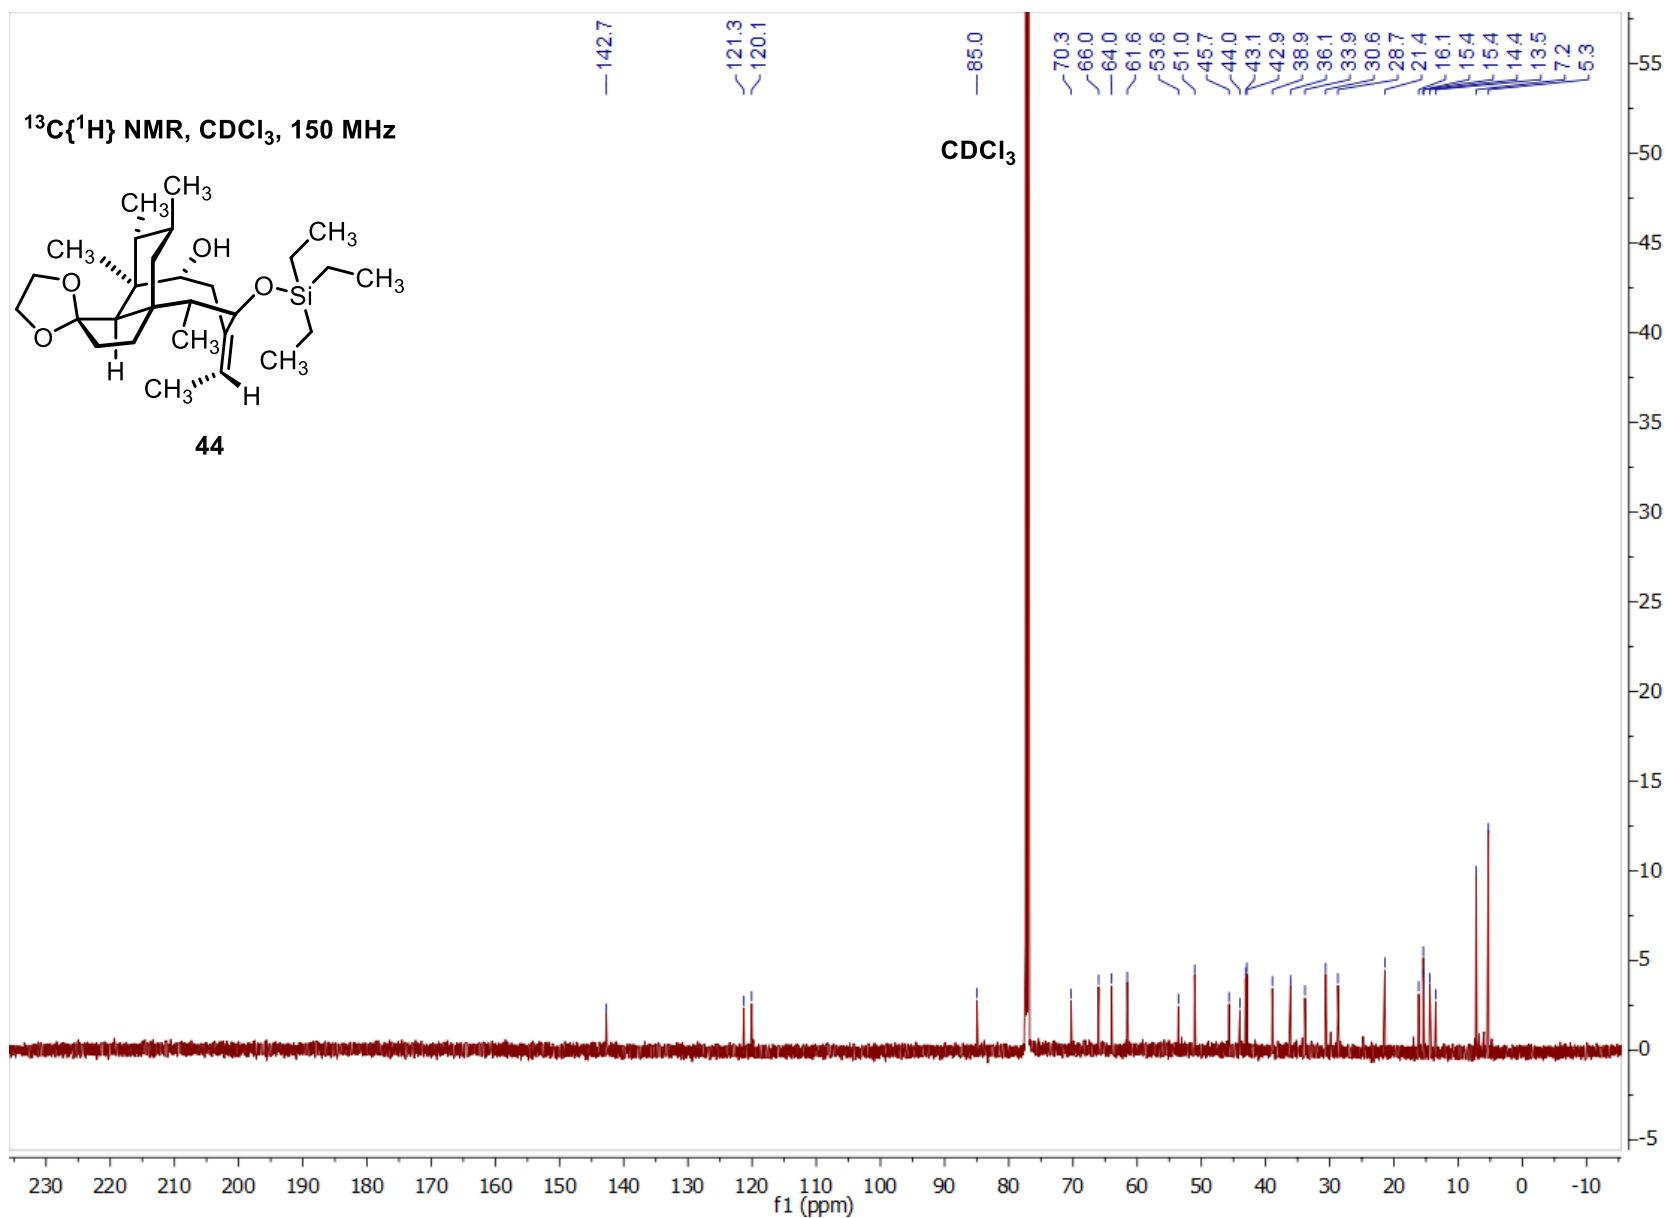

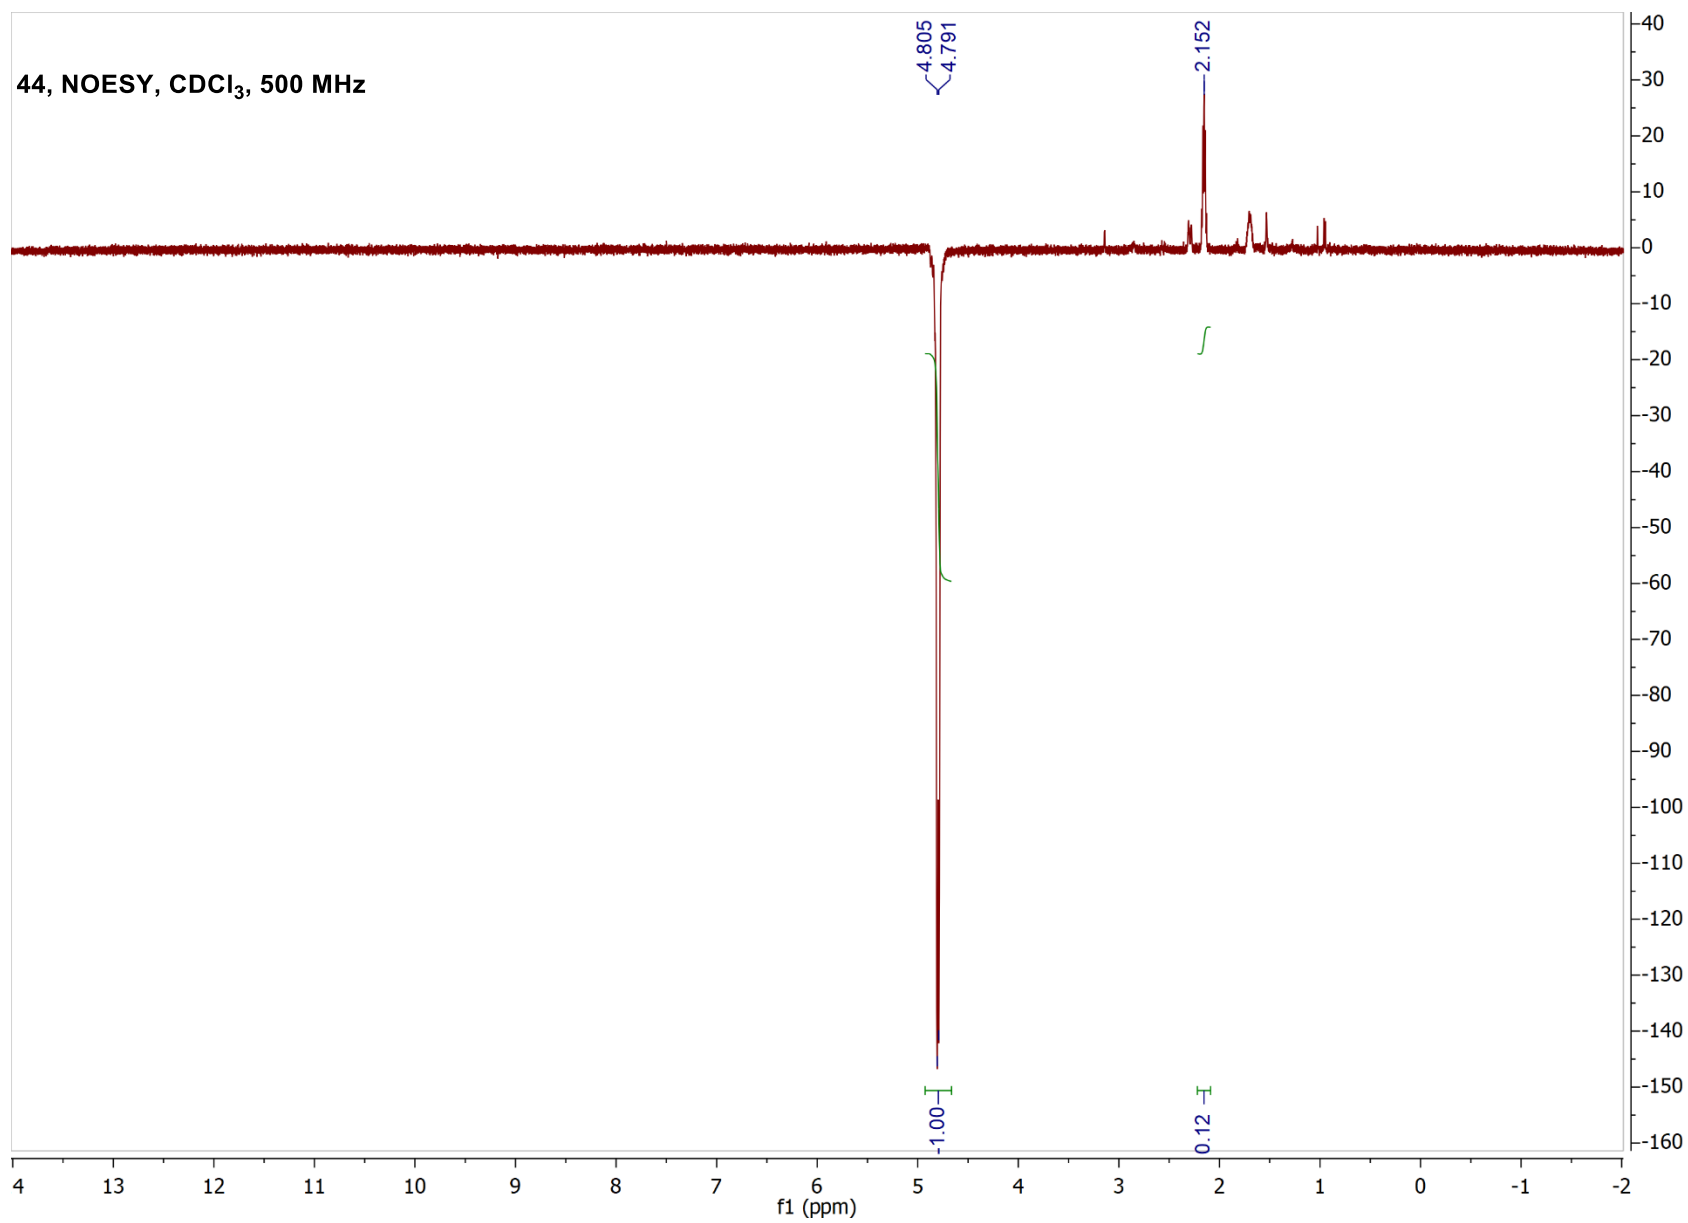

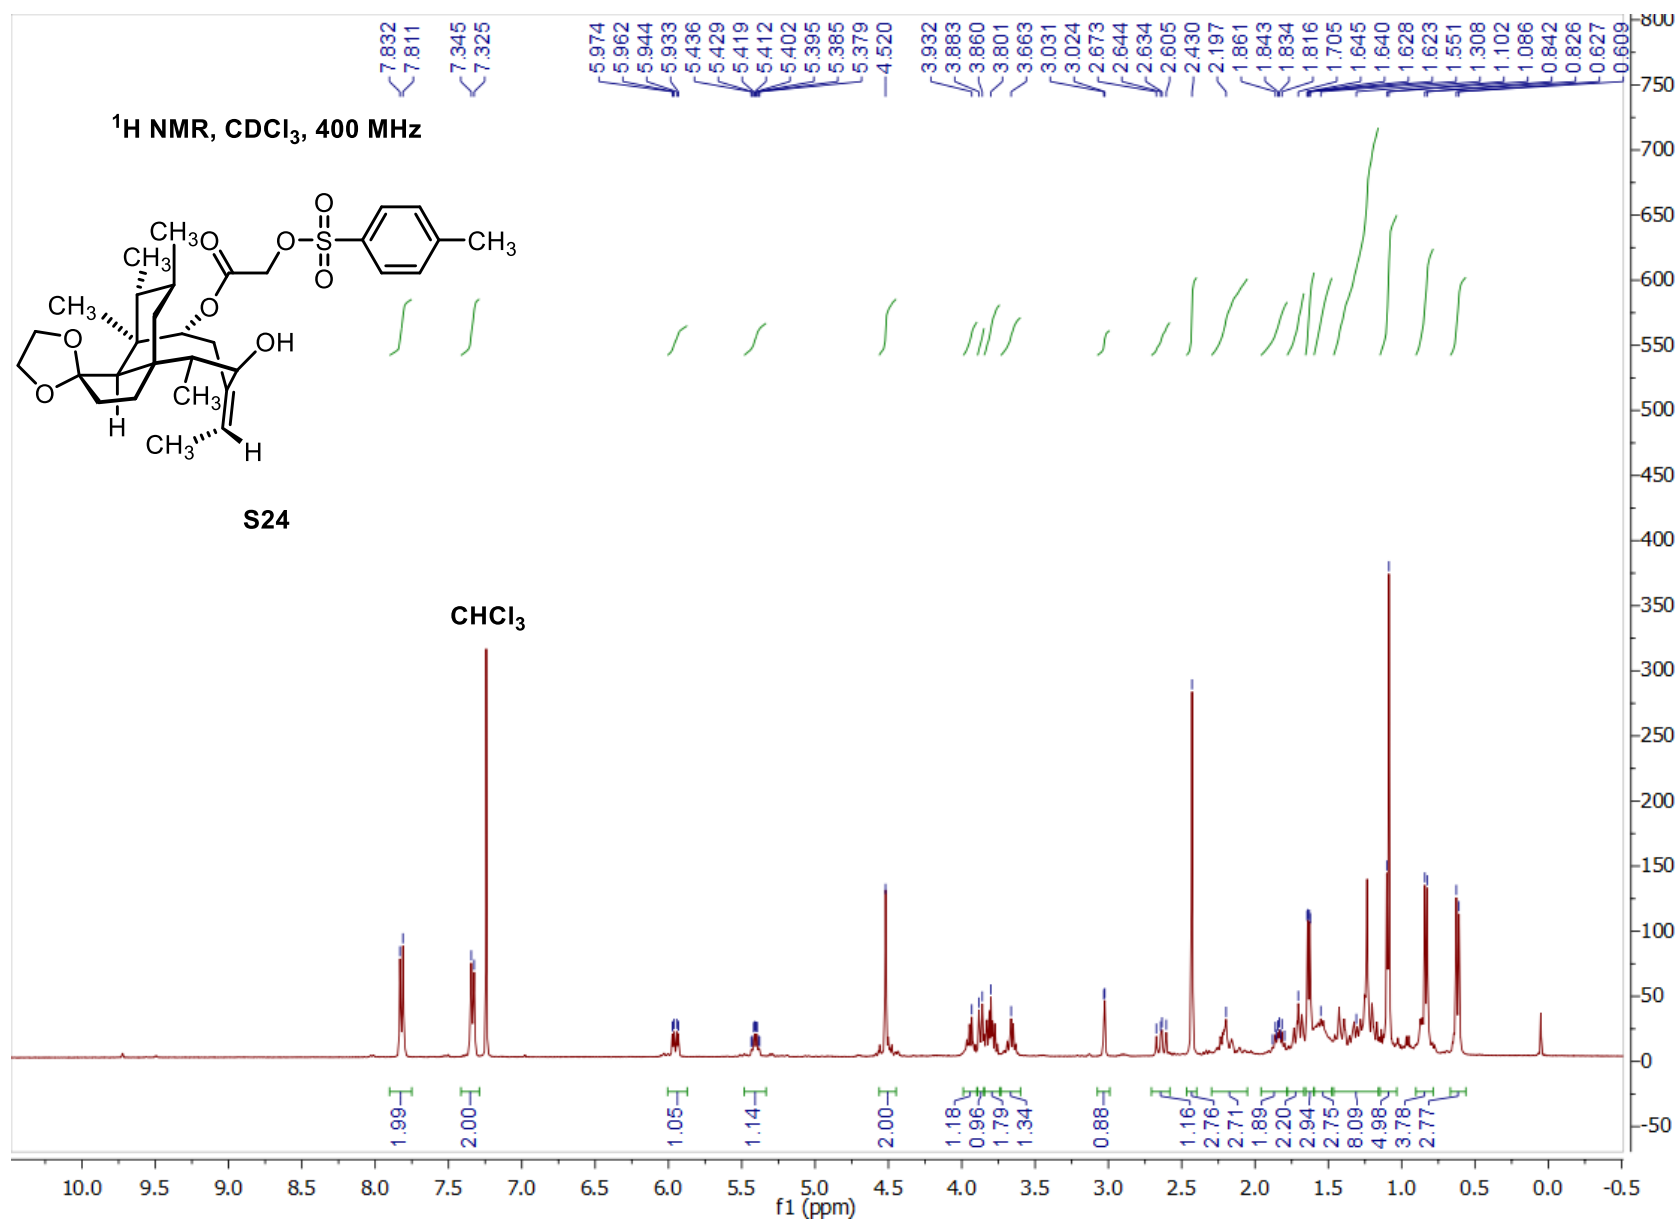

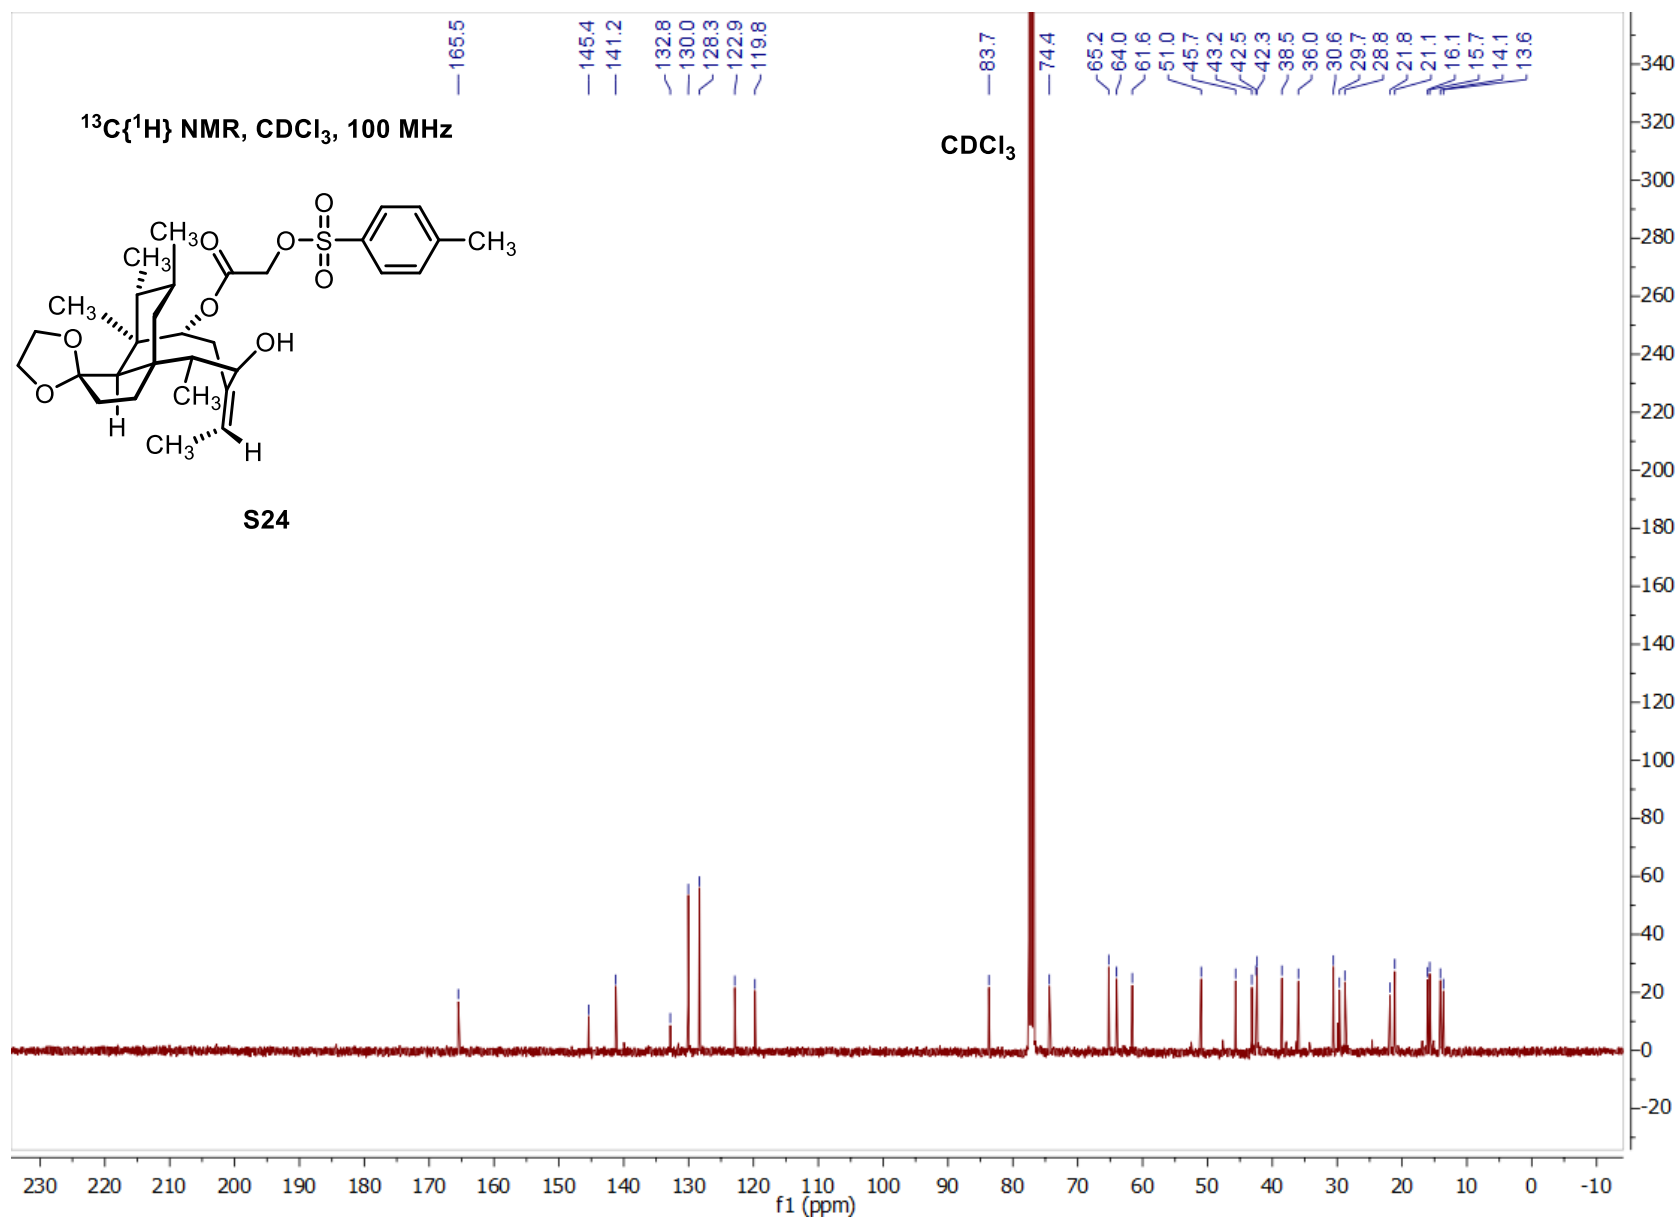

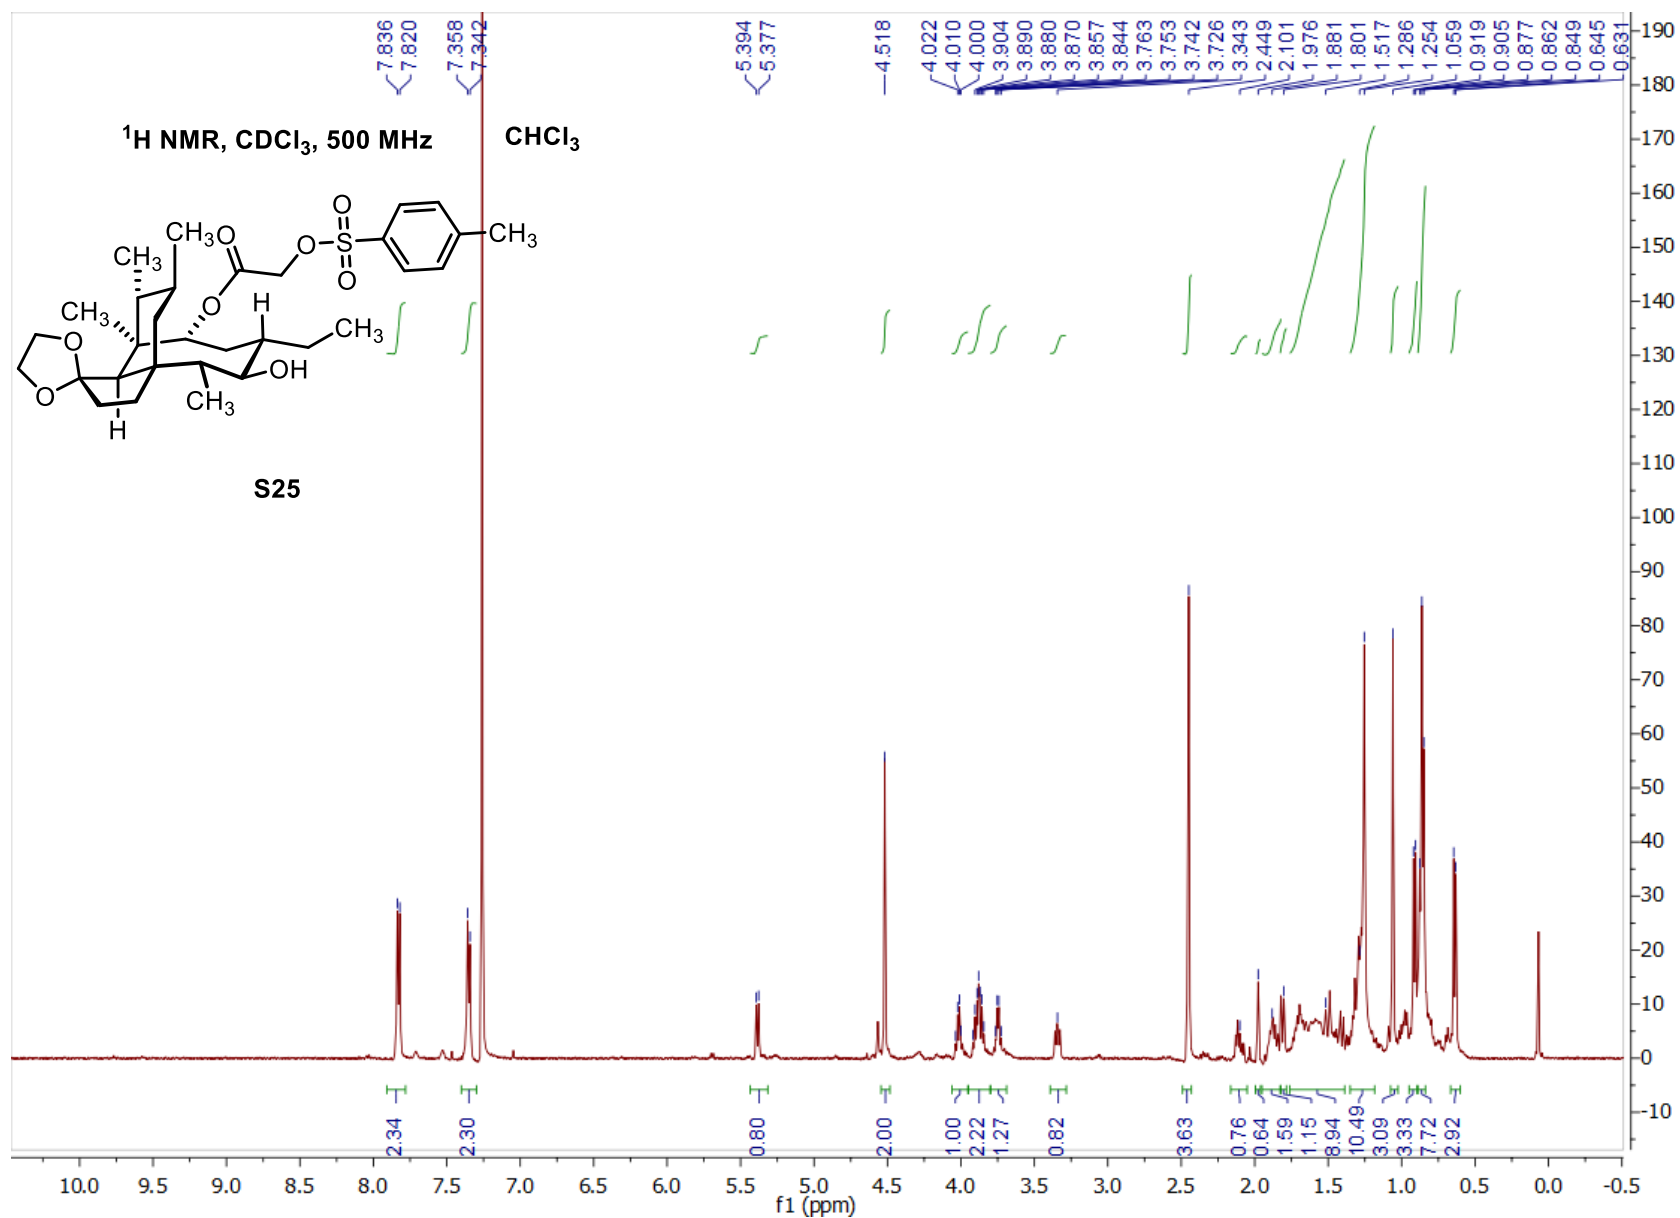

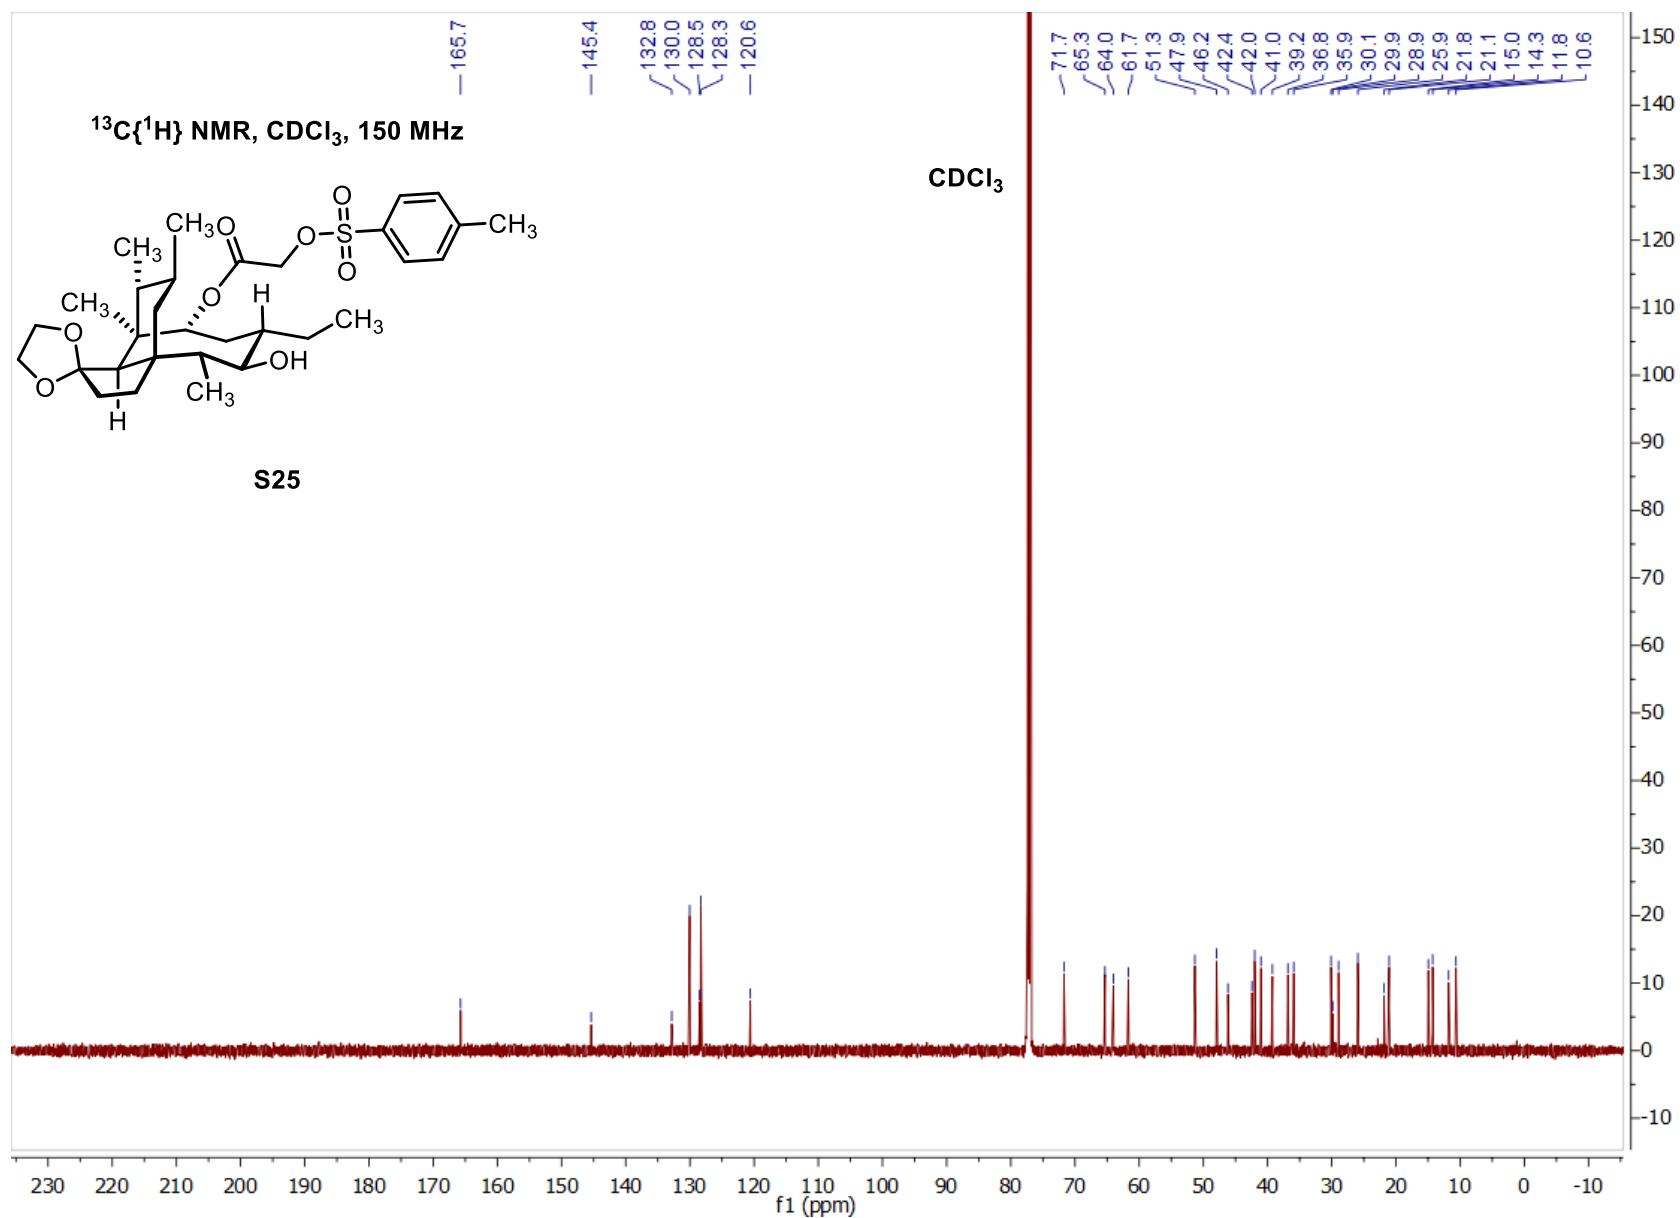

S25, NOESY, CDCl<sub>3</sub>, 500 MHz

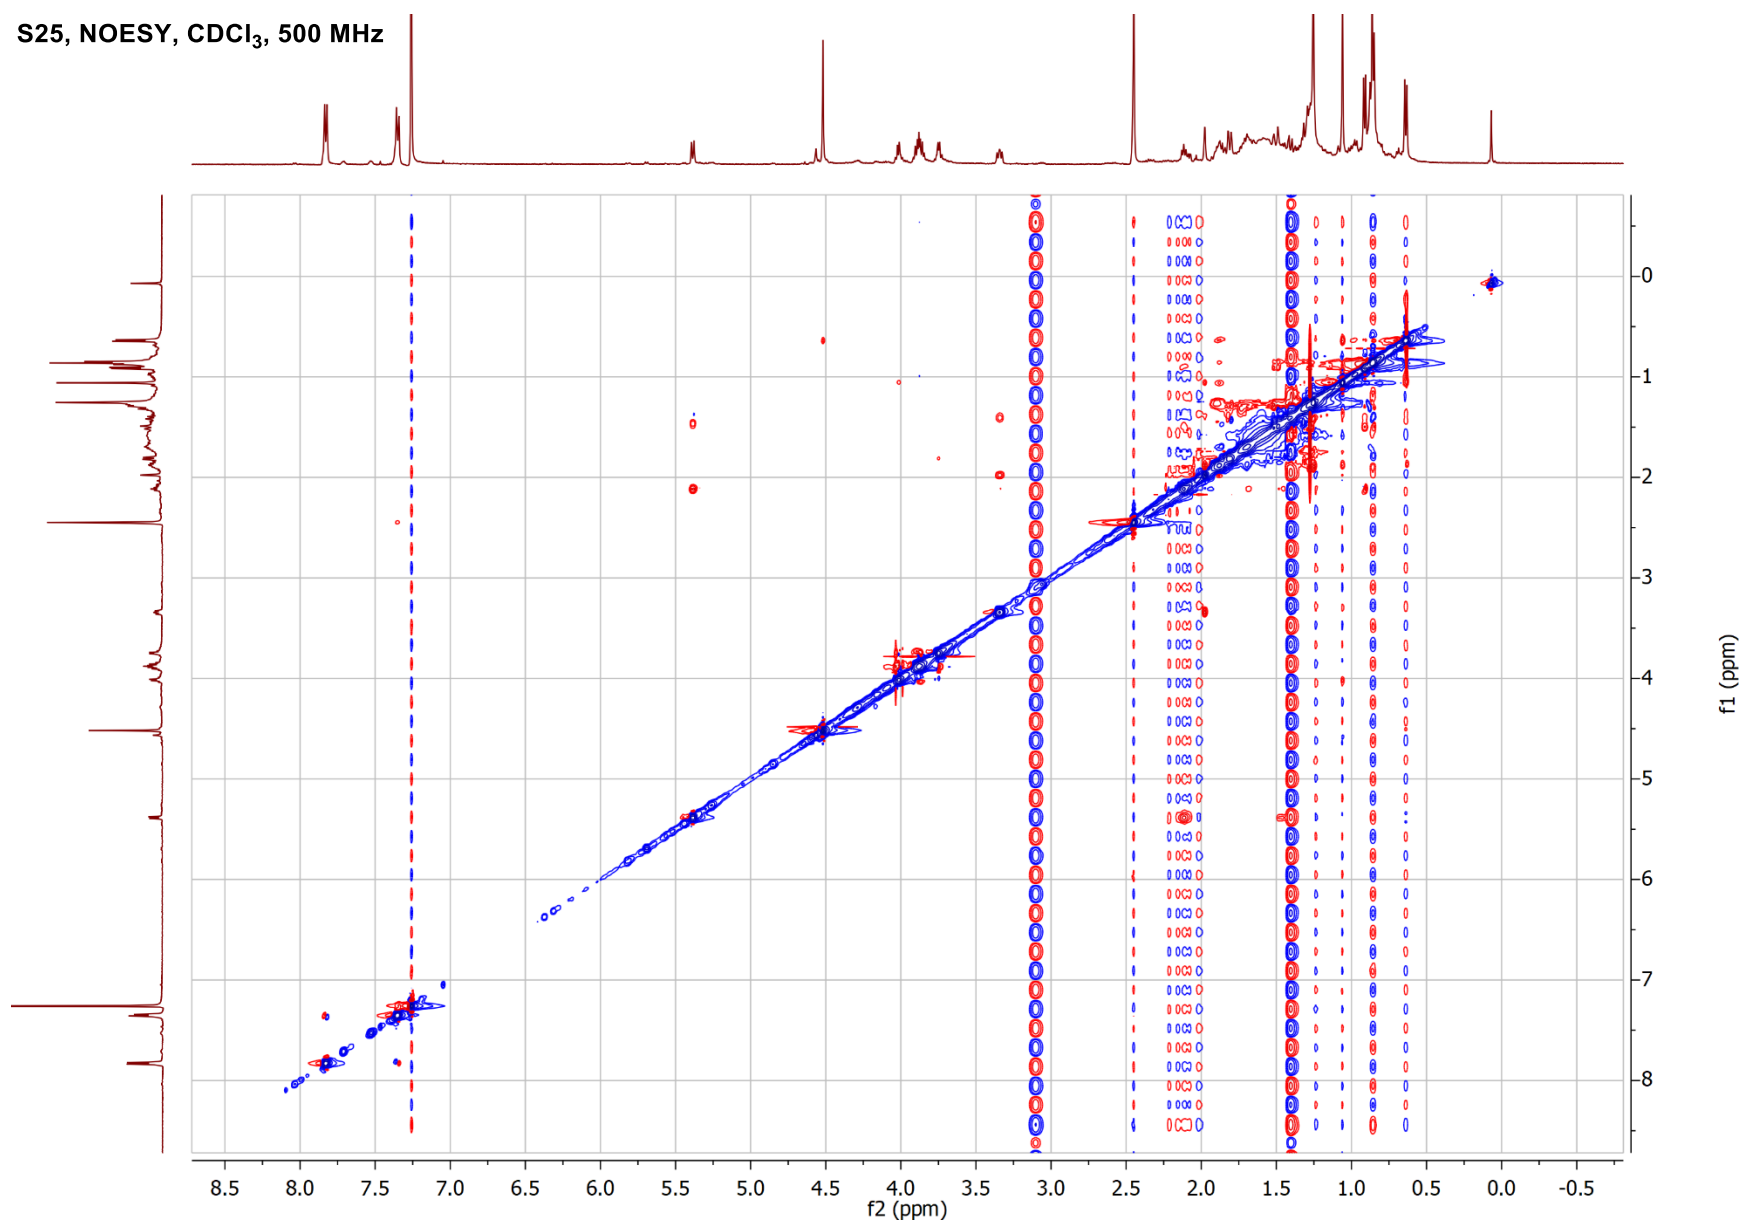

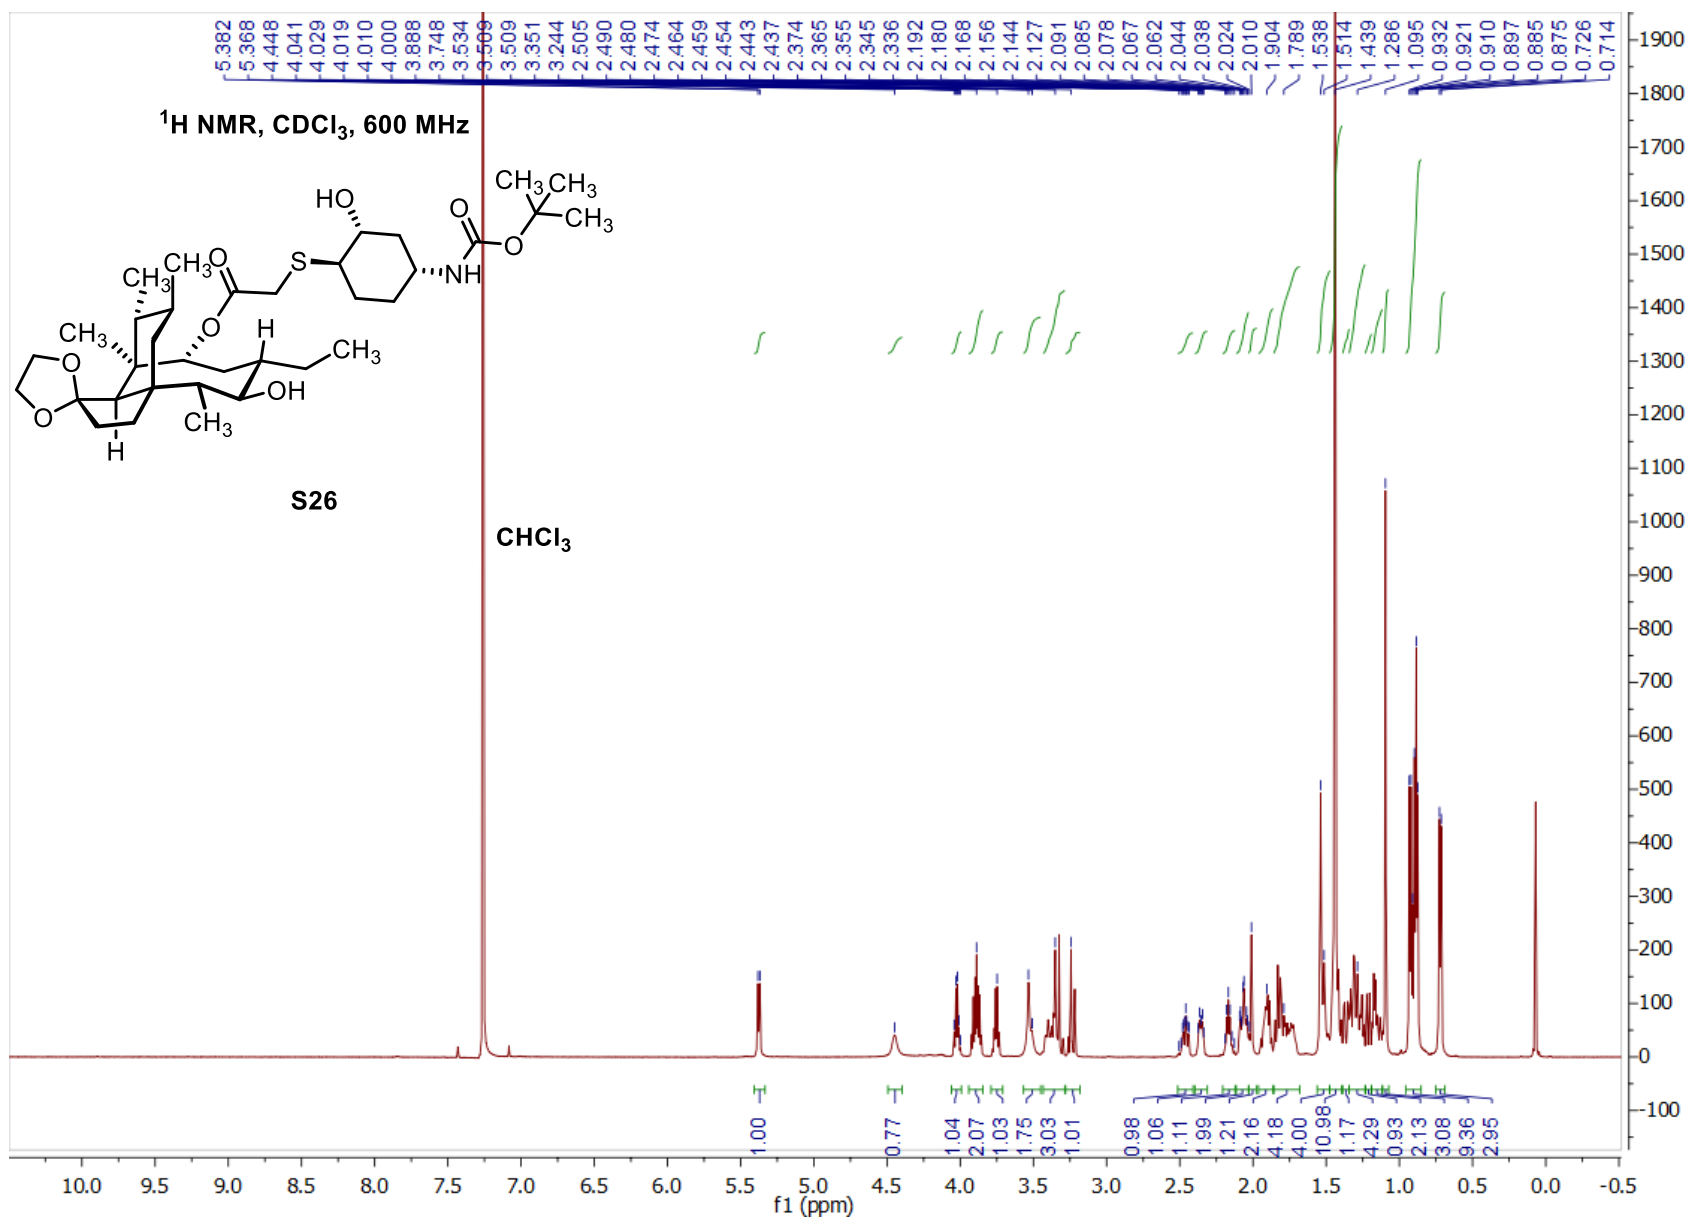



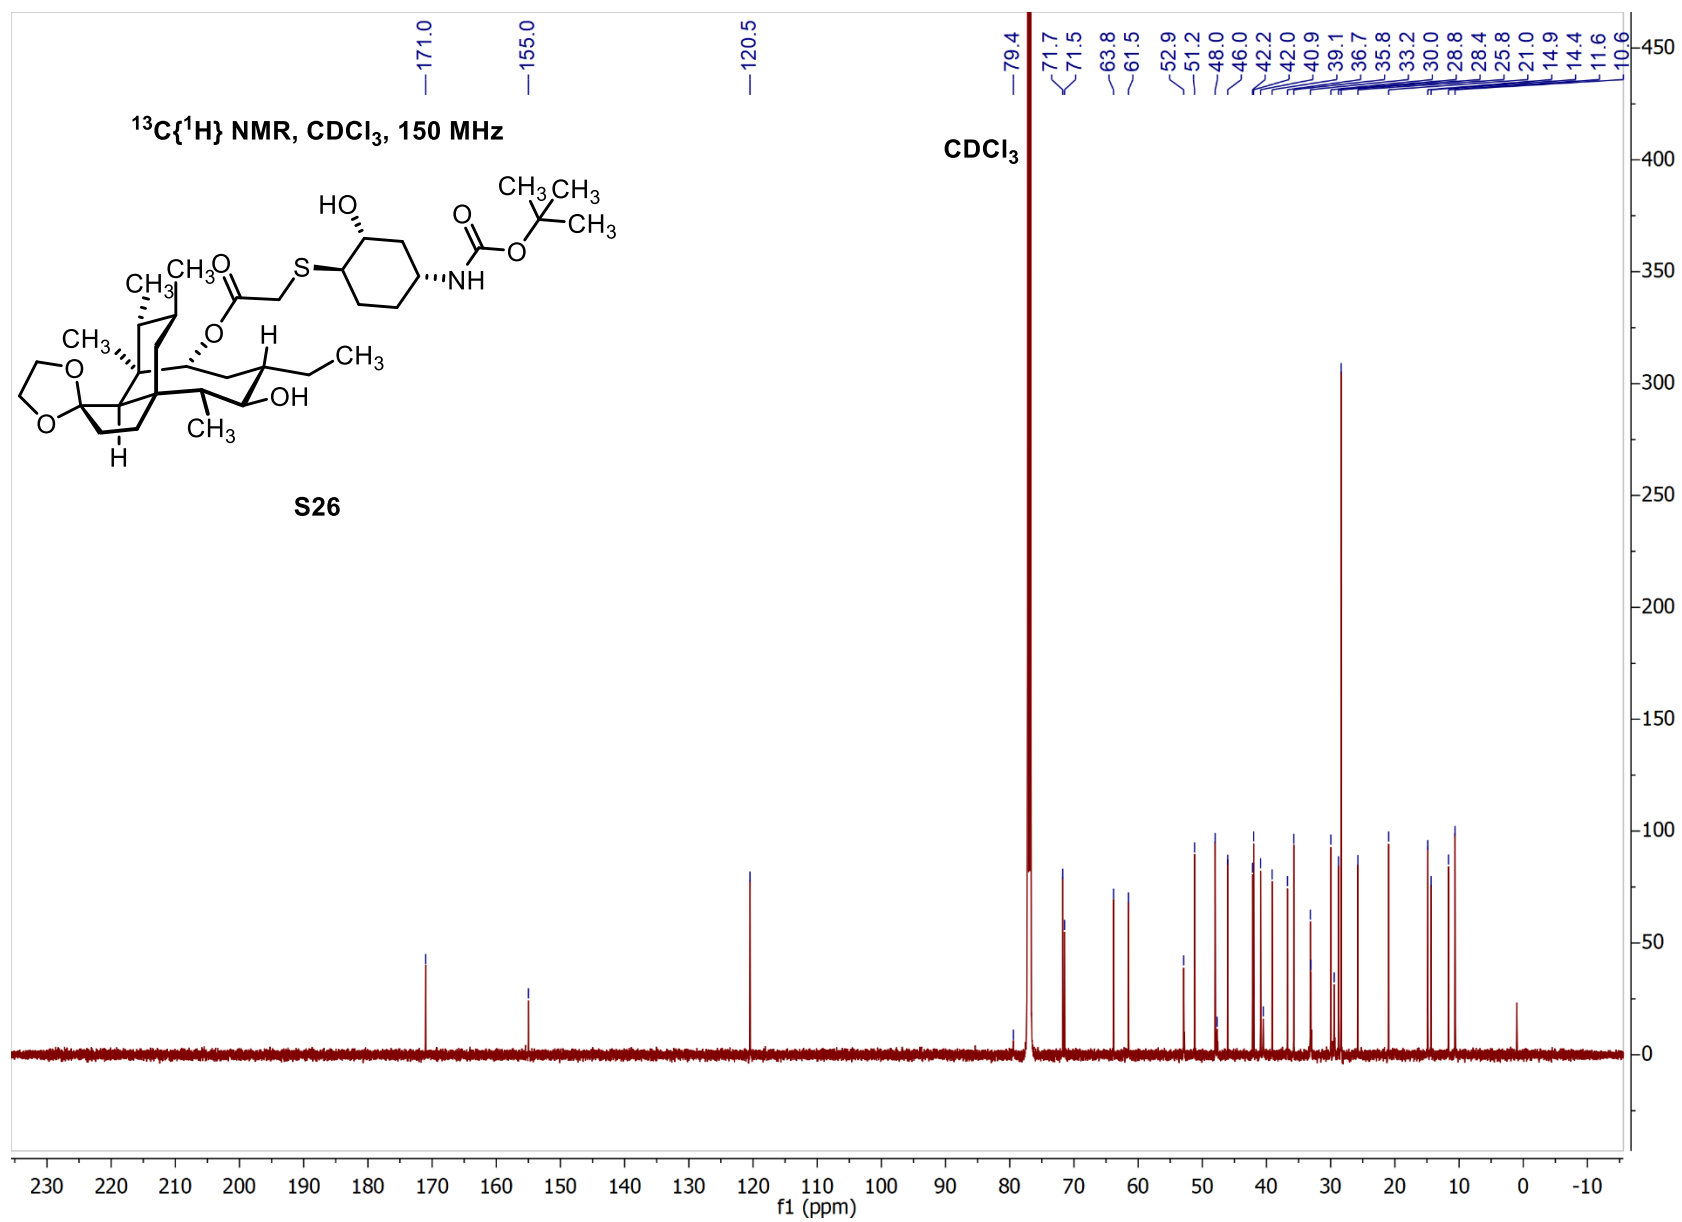

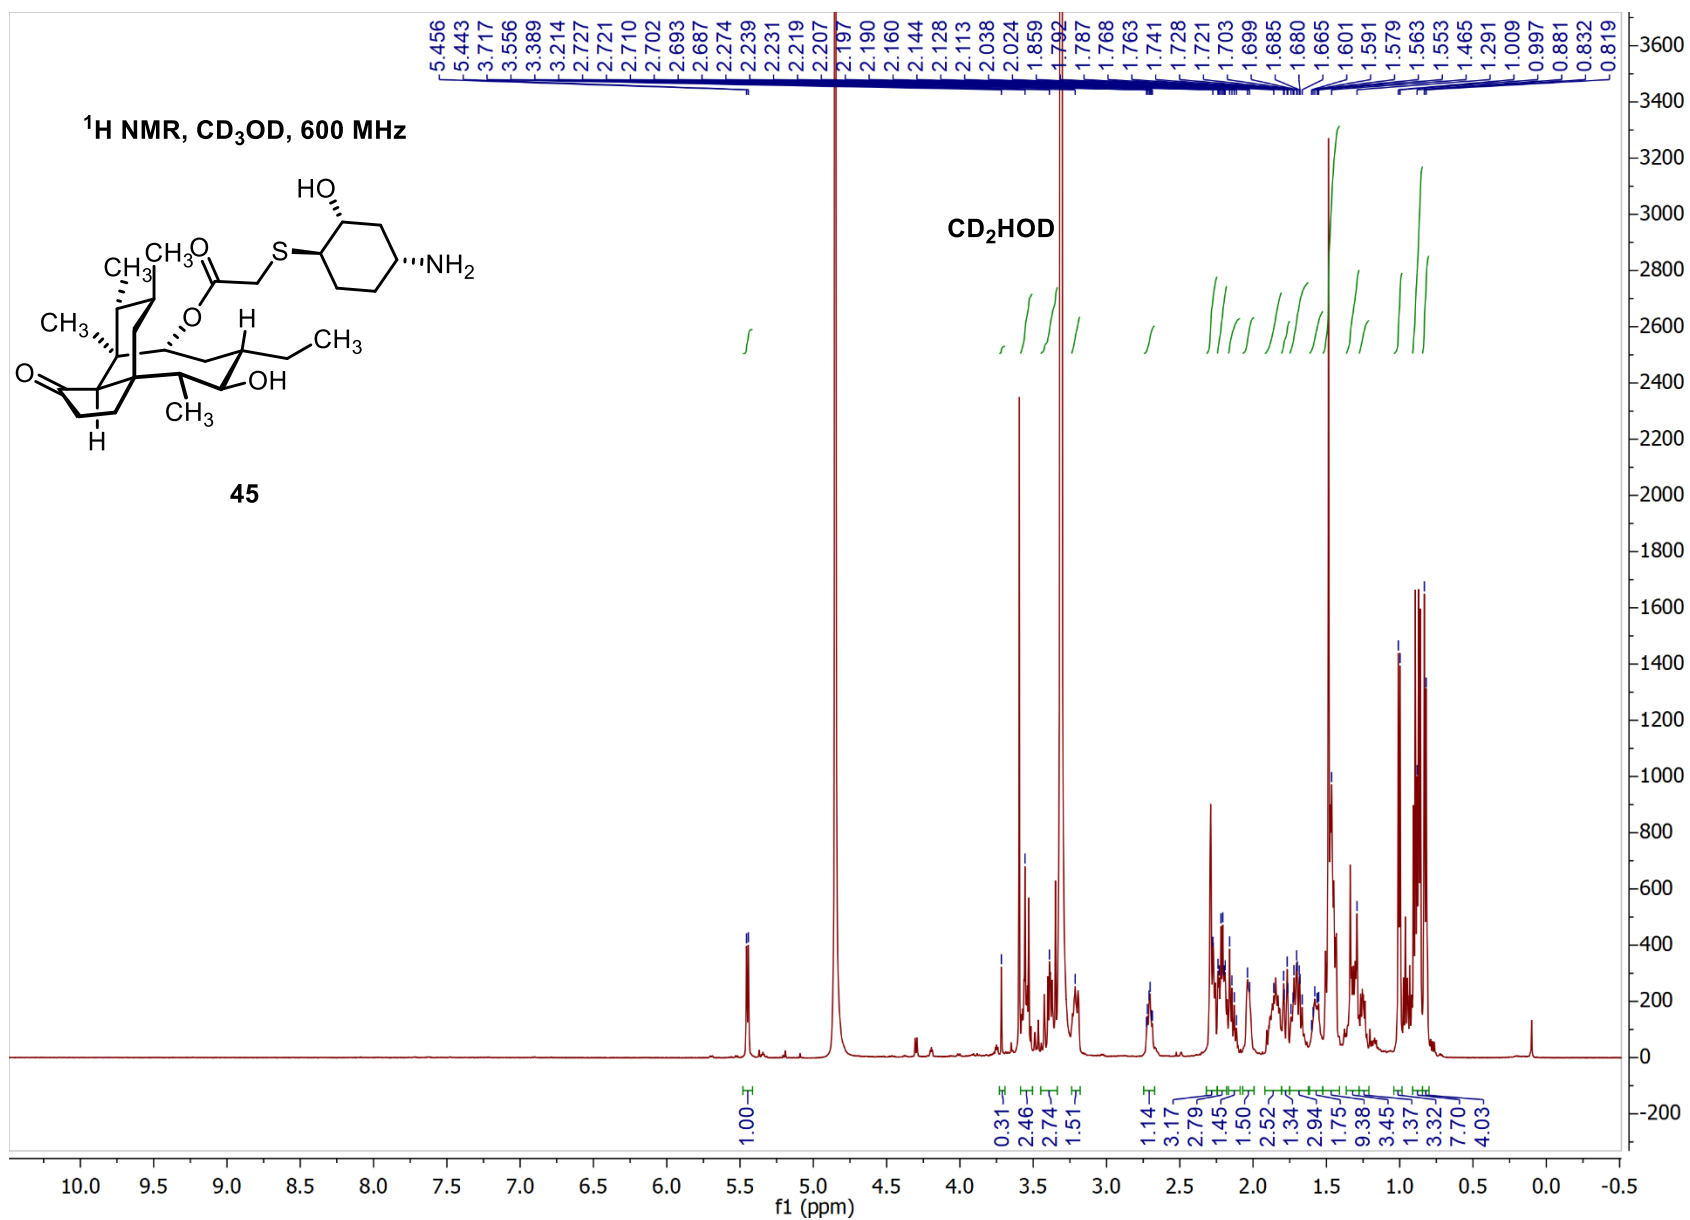

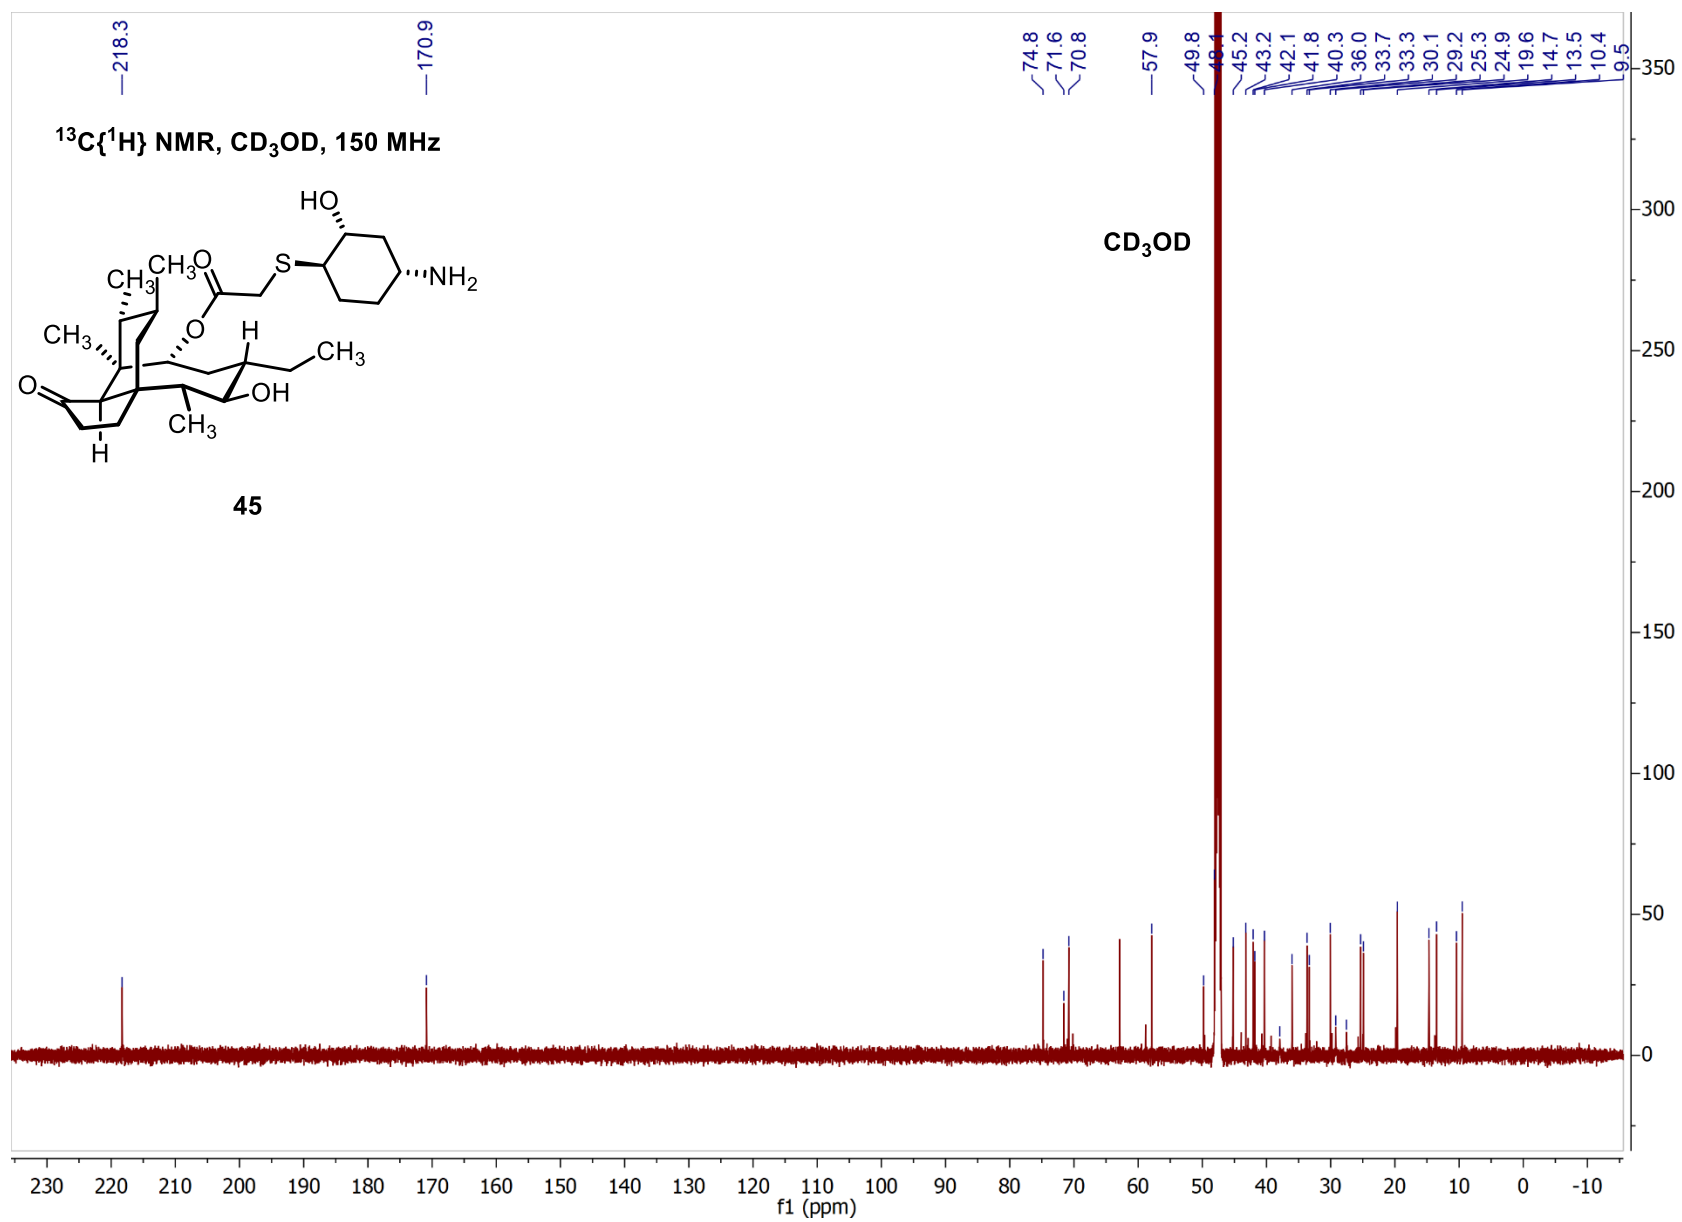

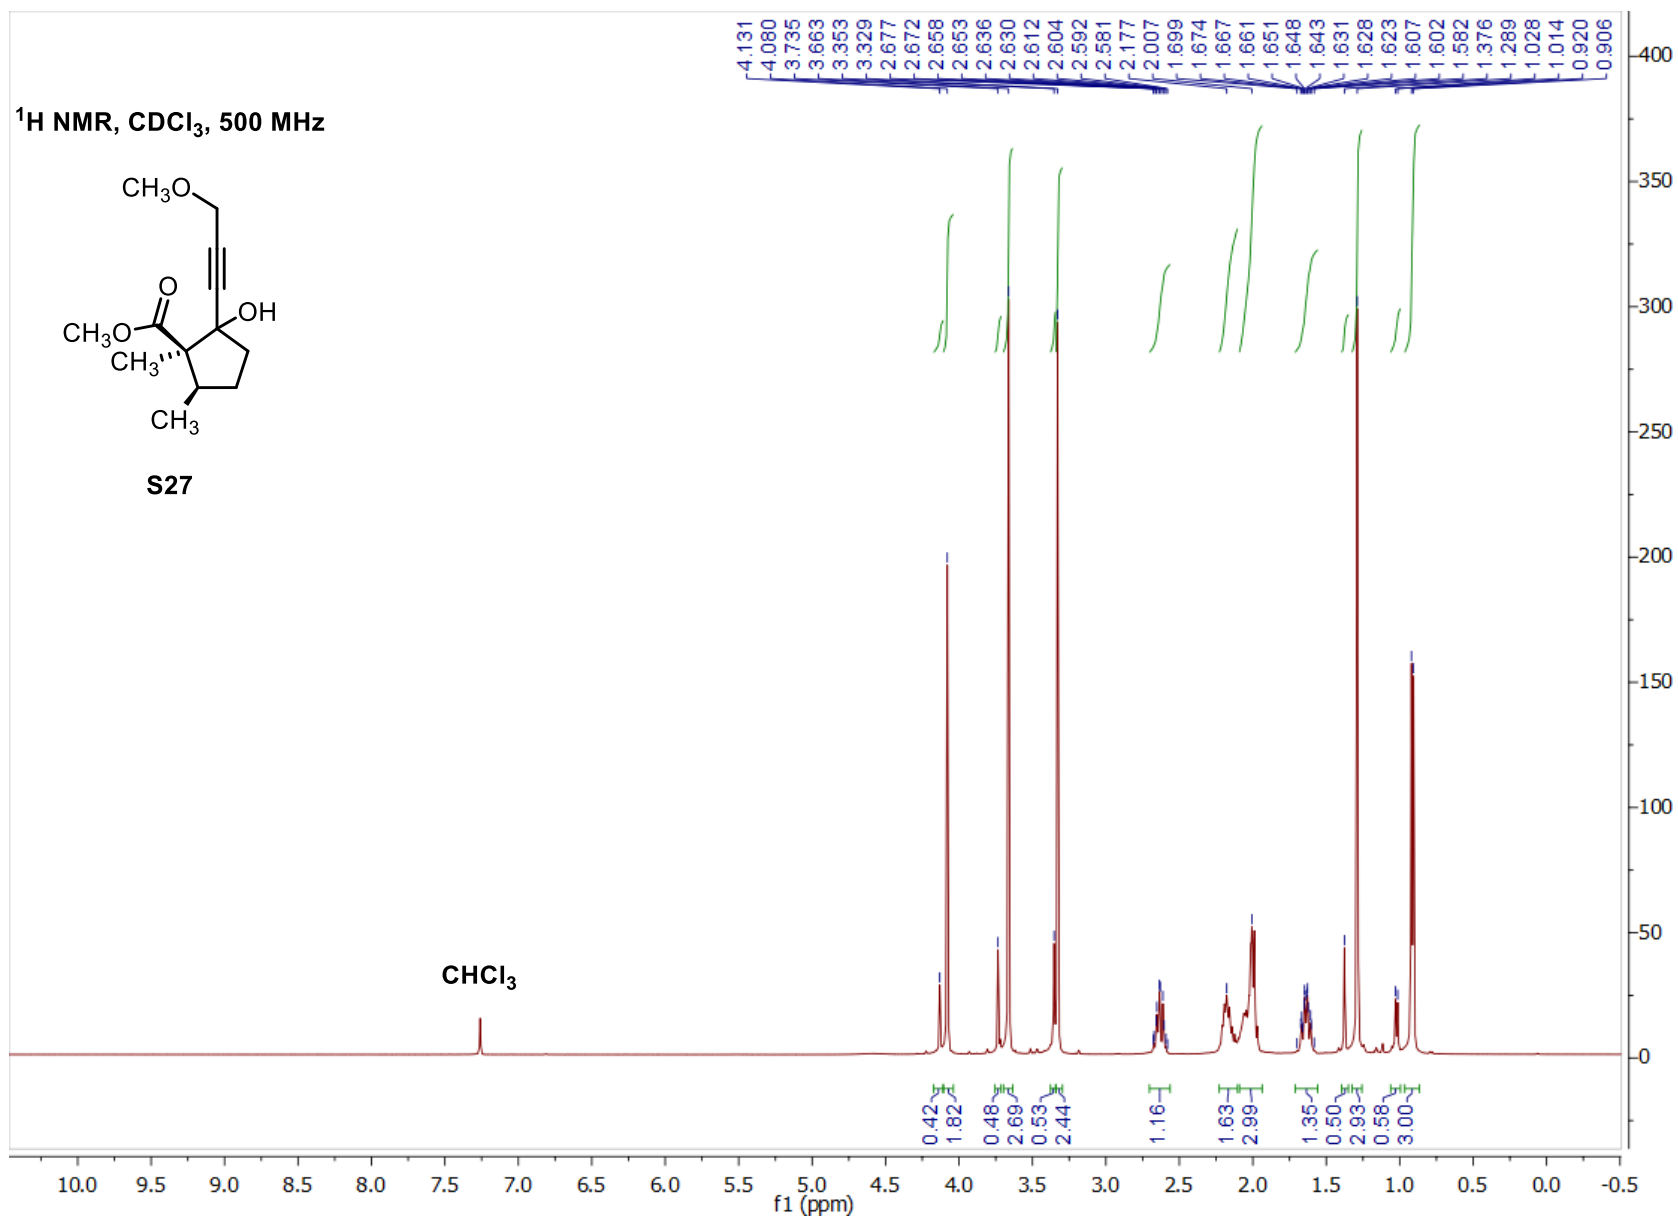

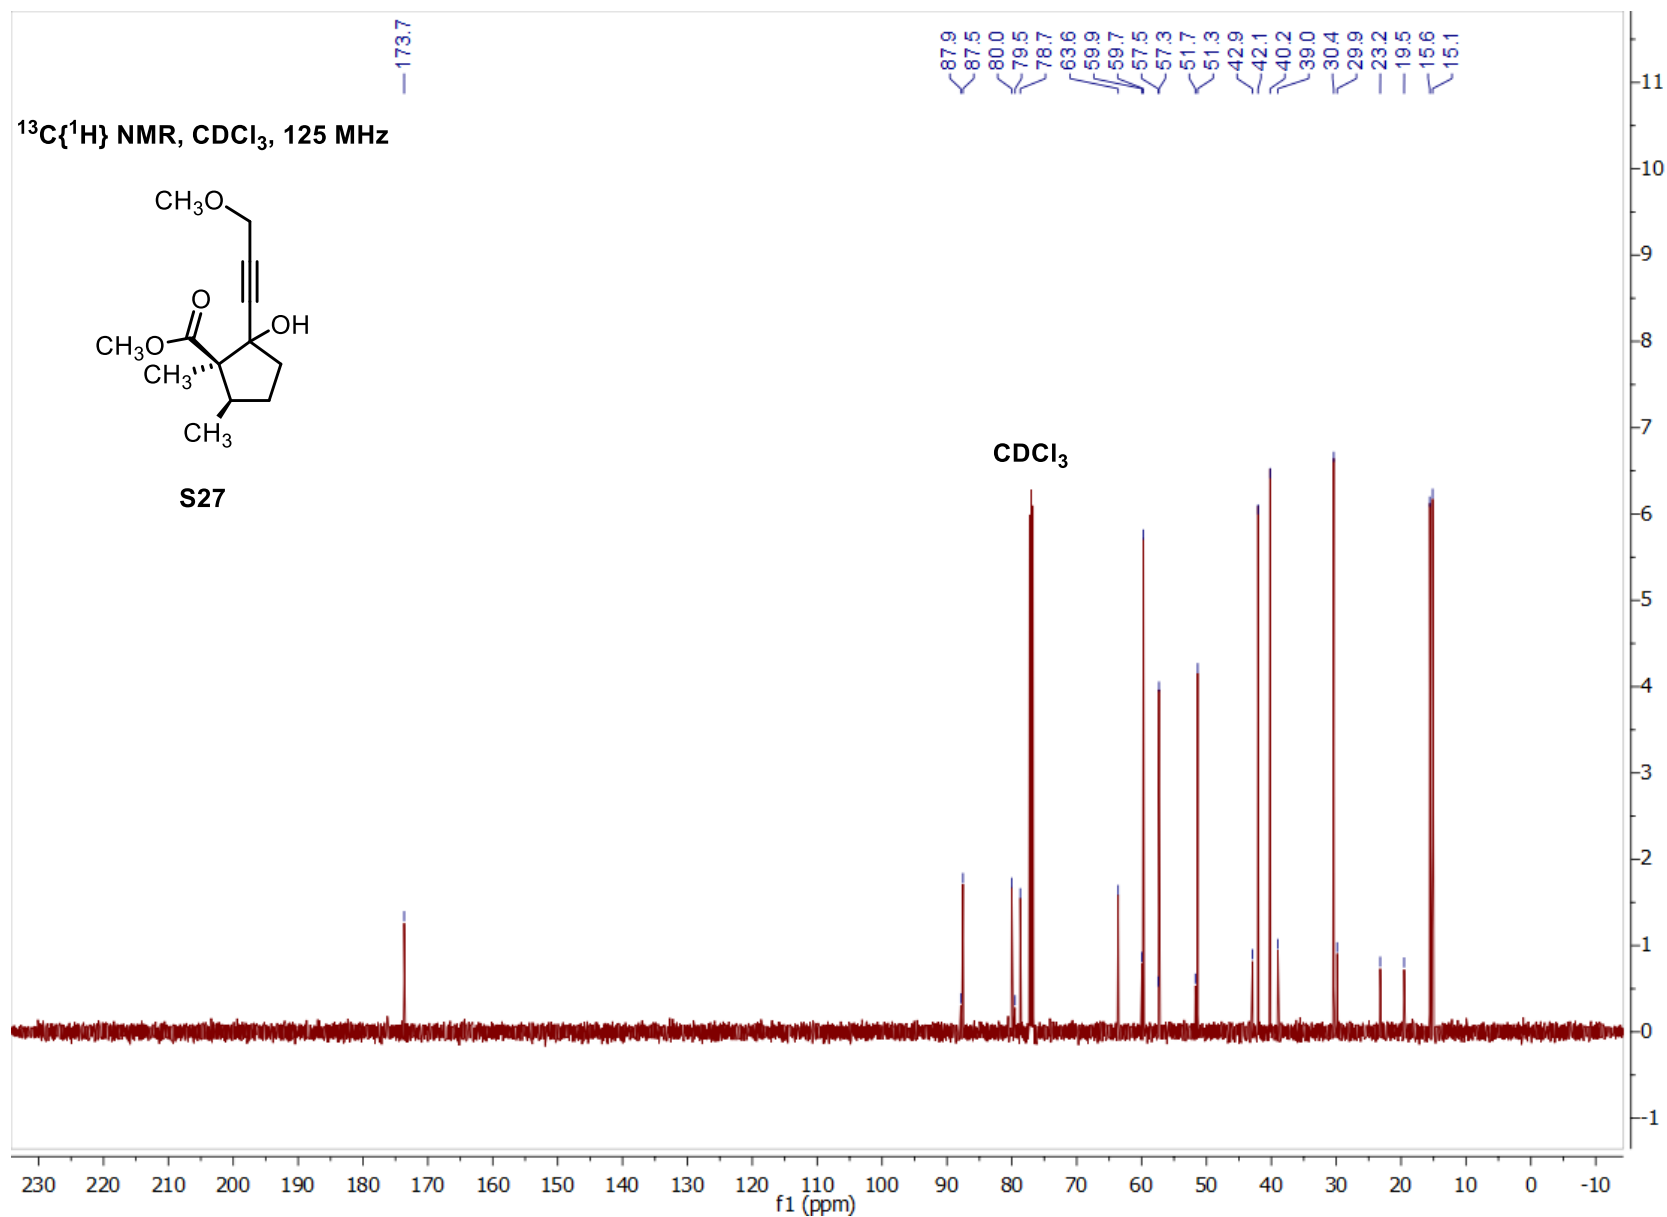

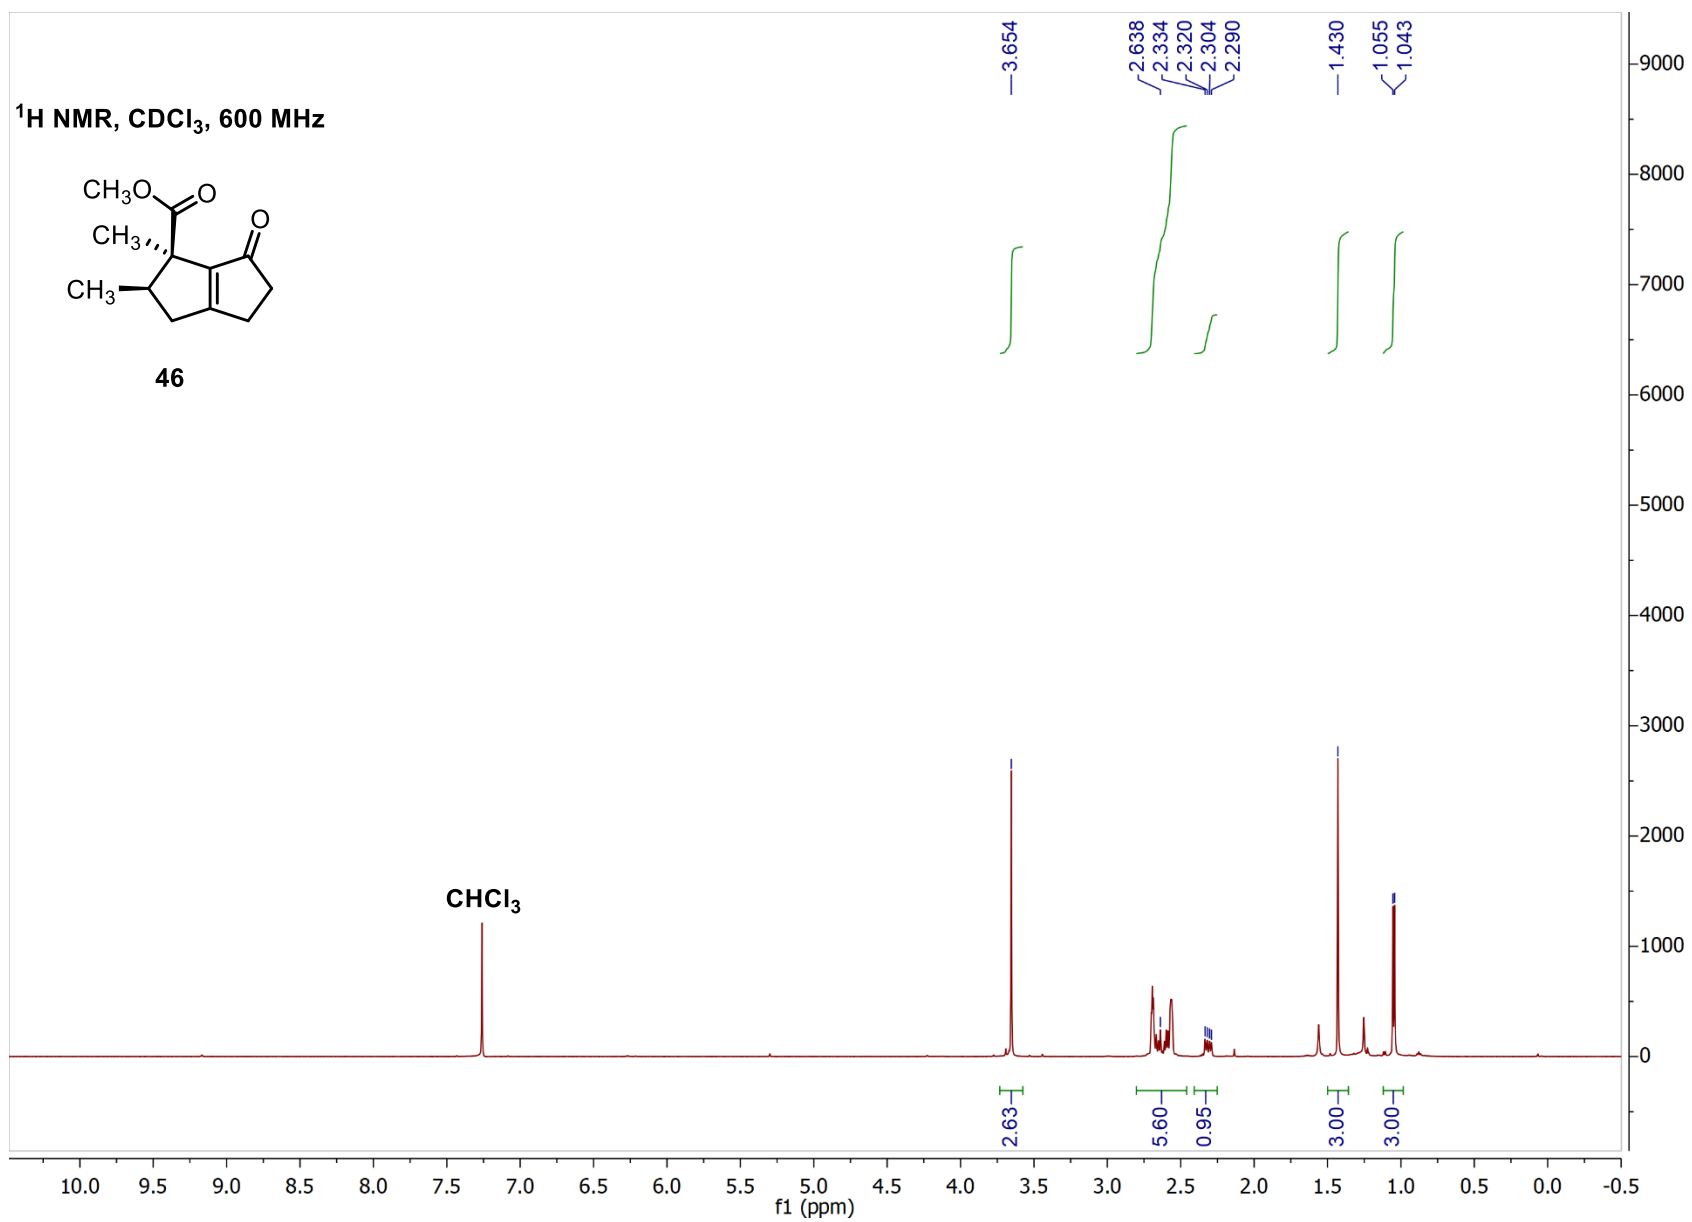

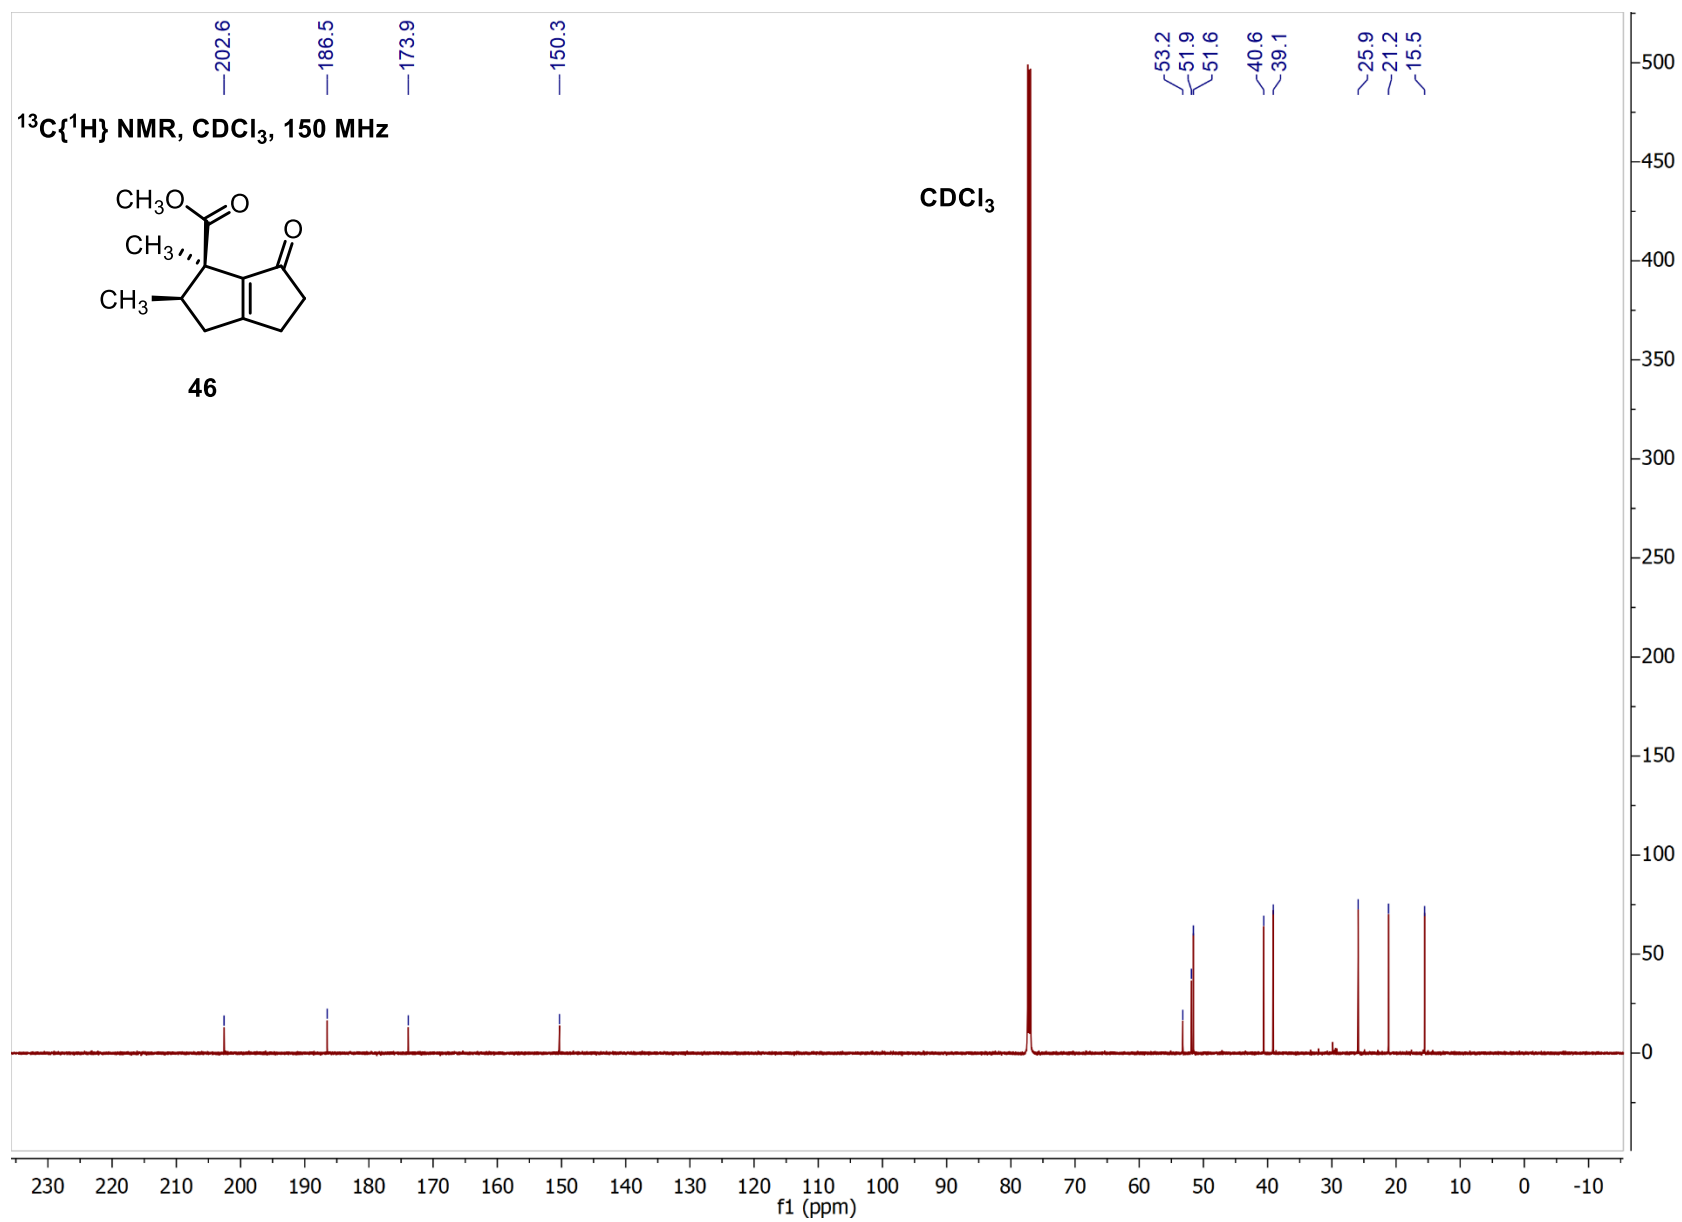

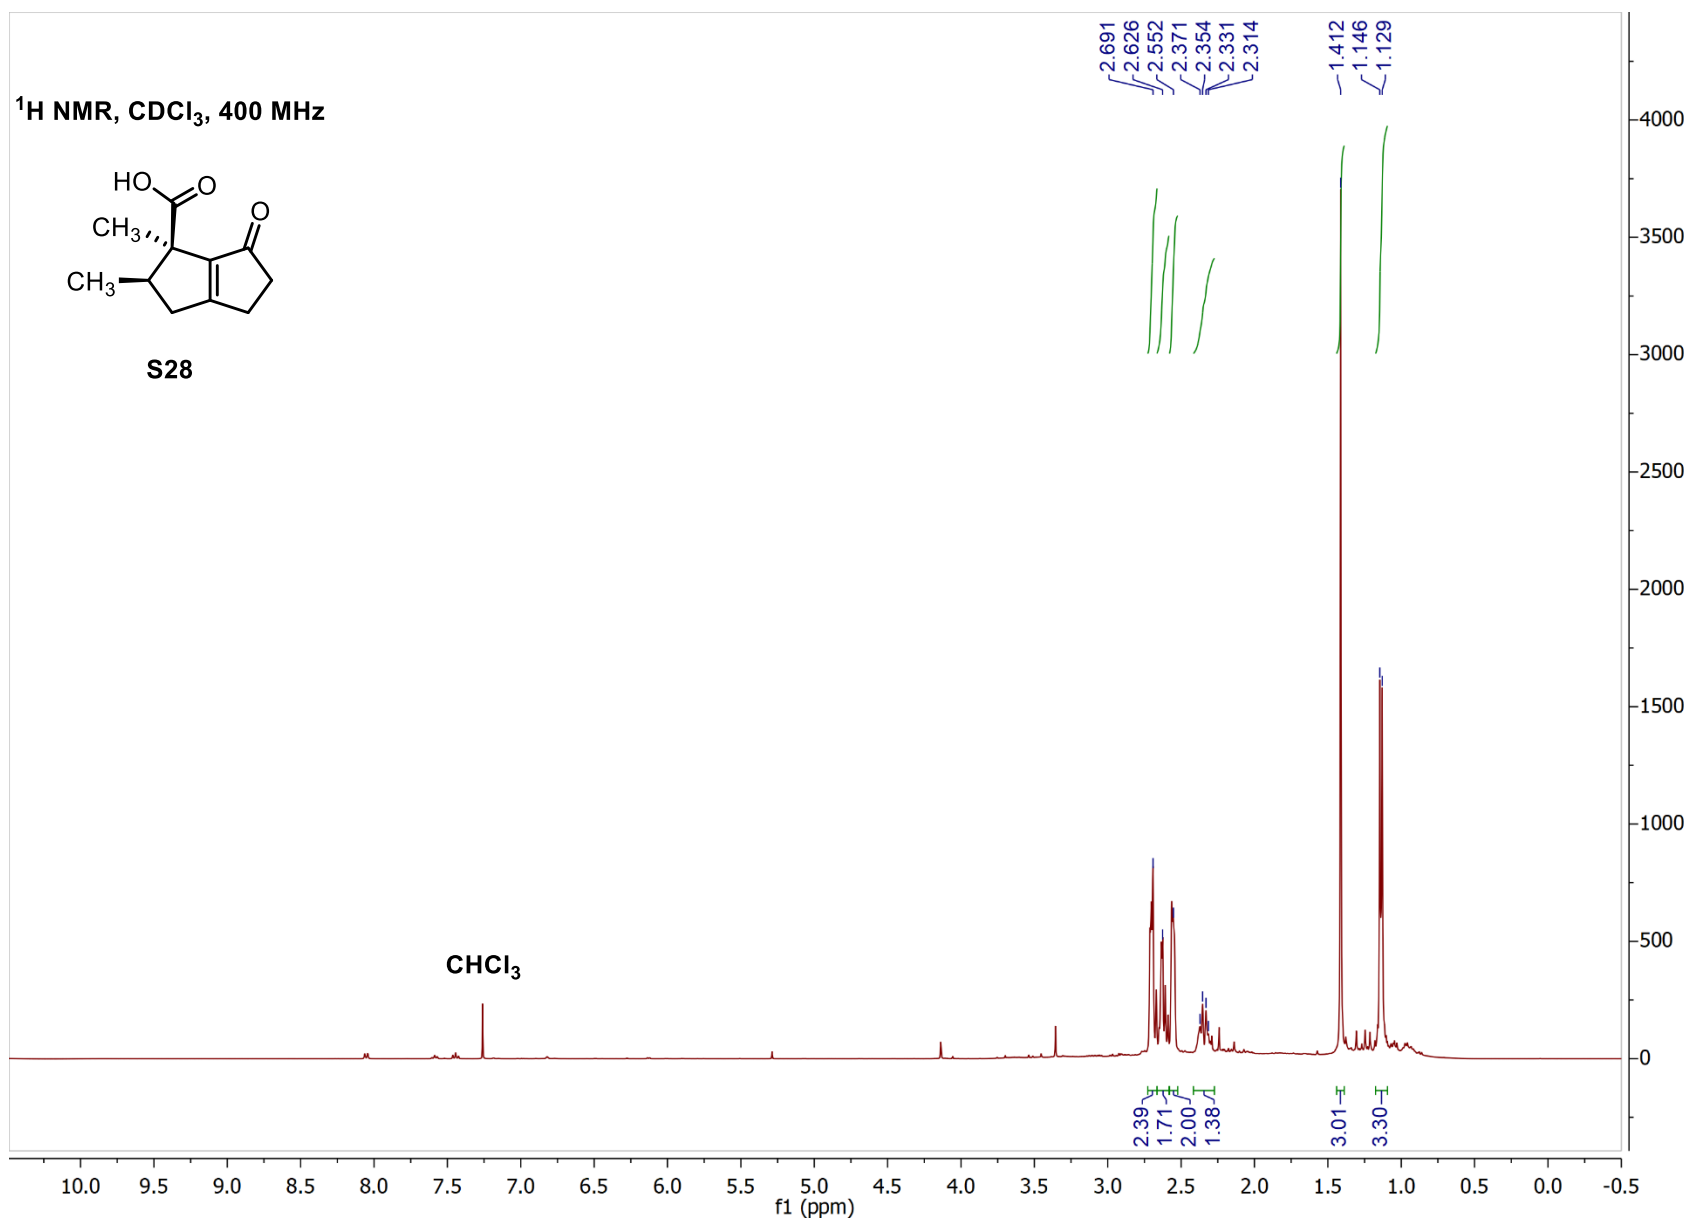



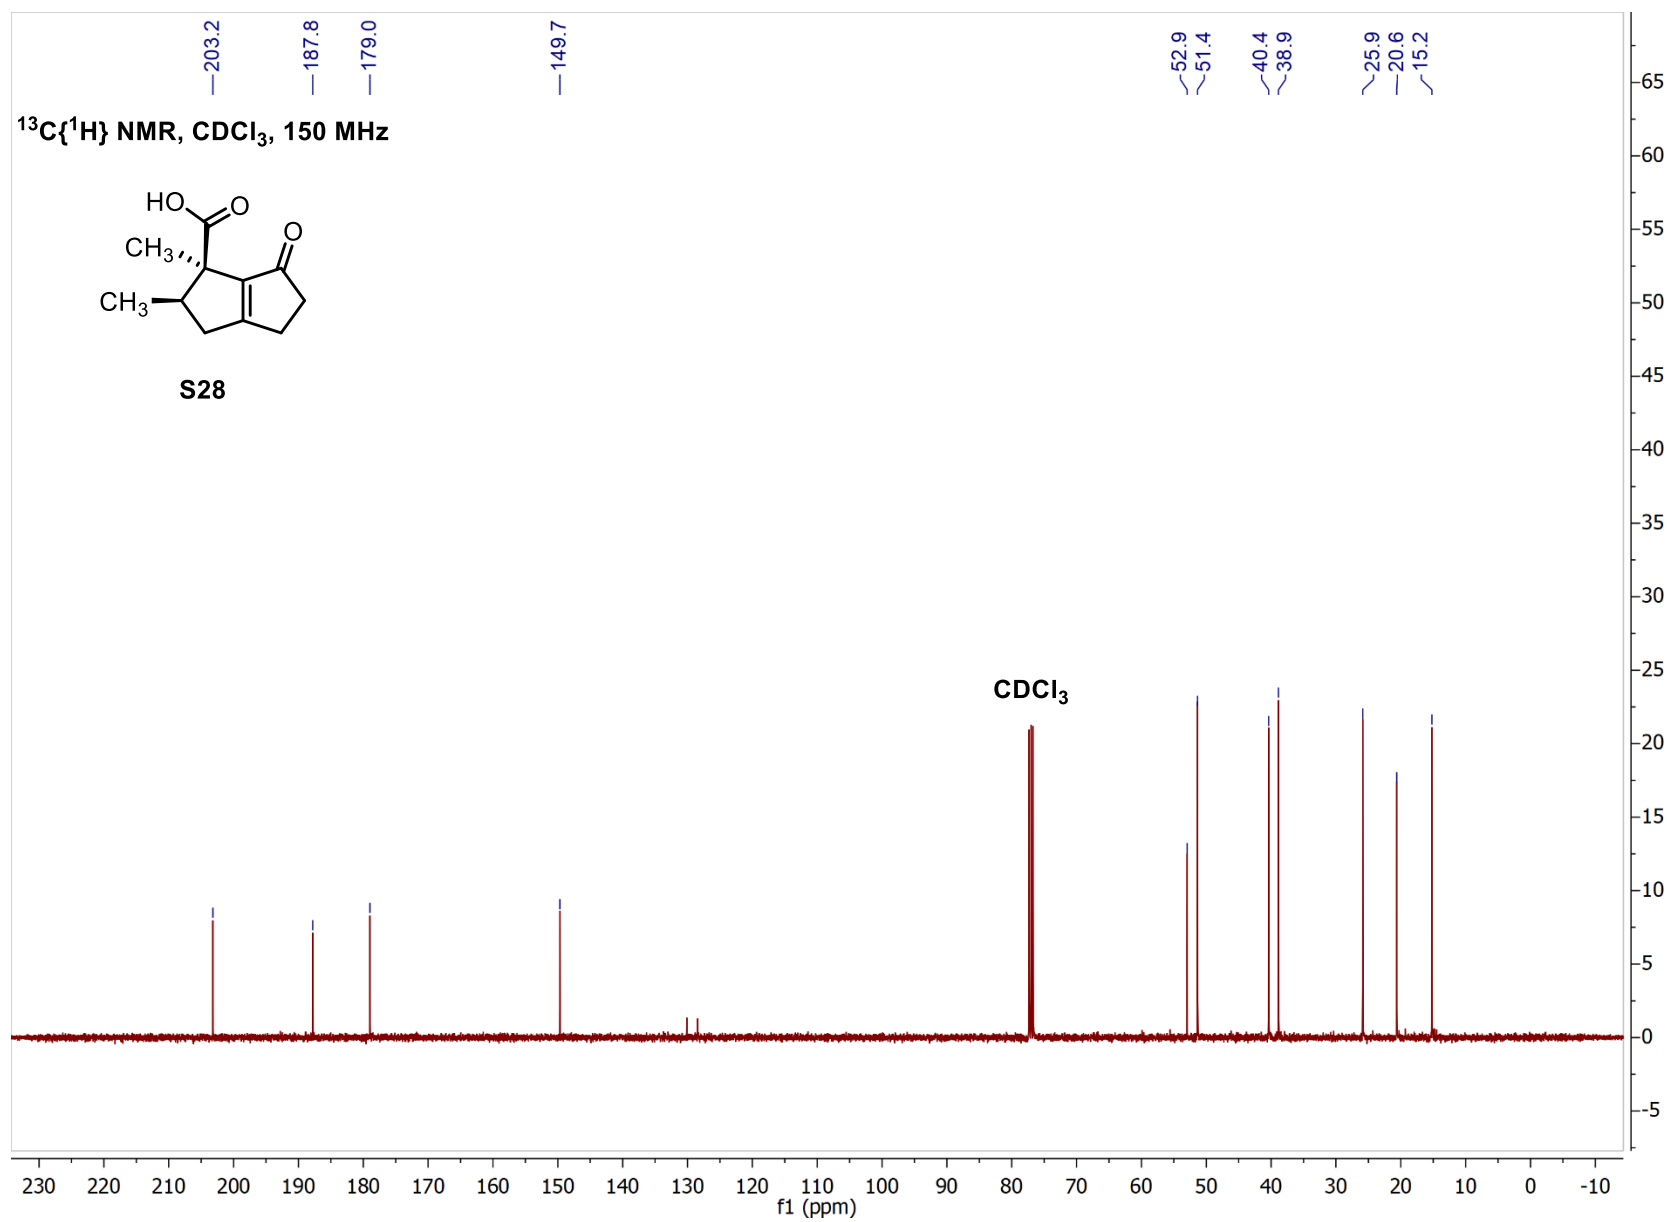

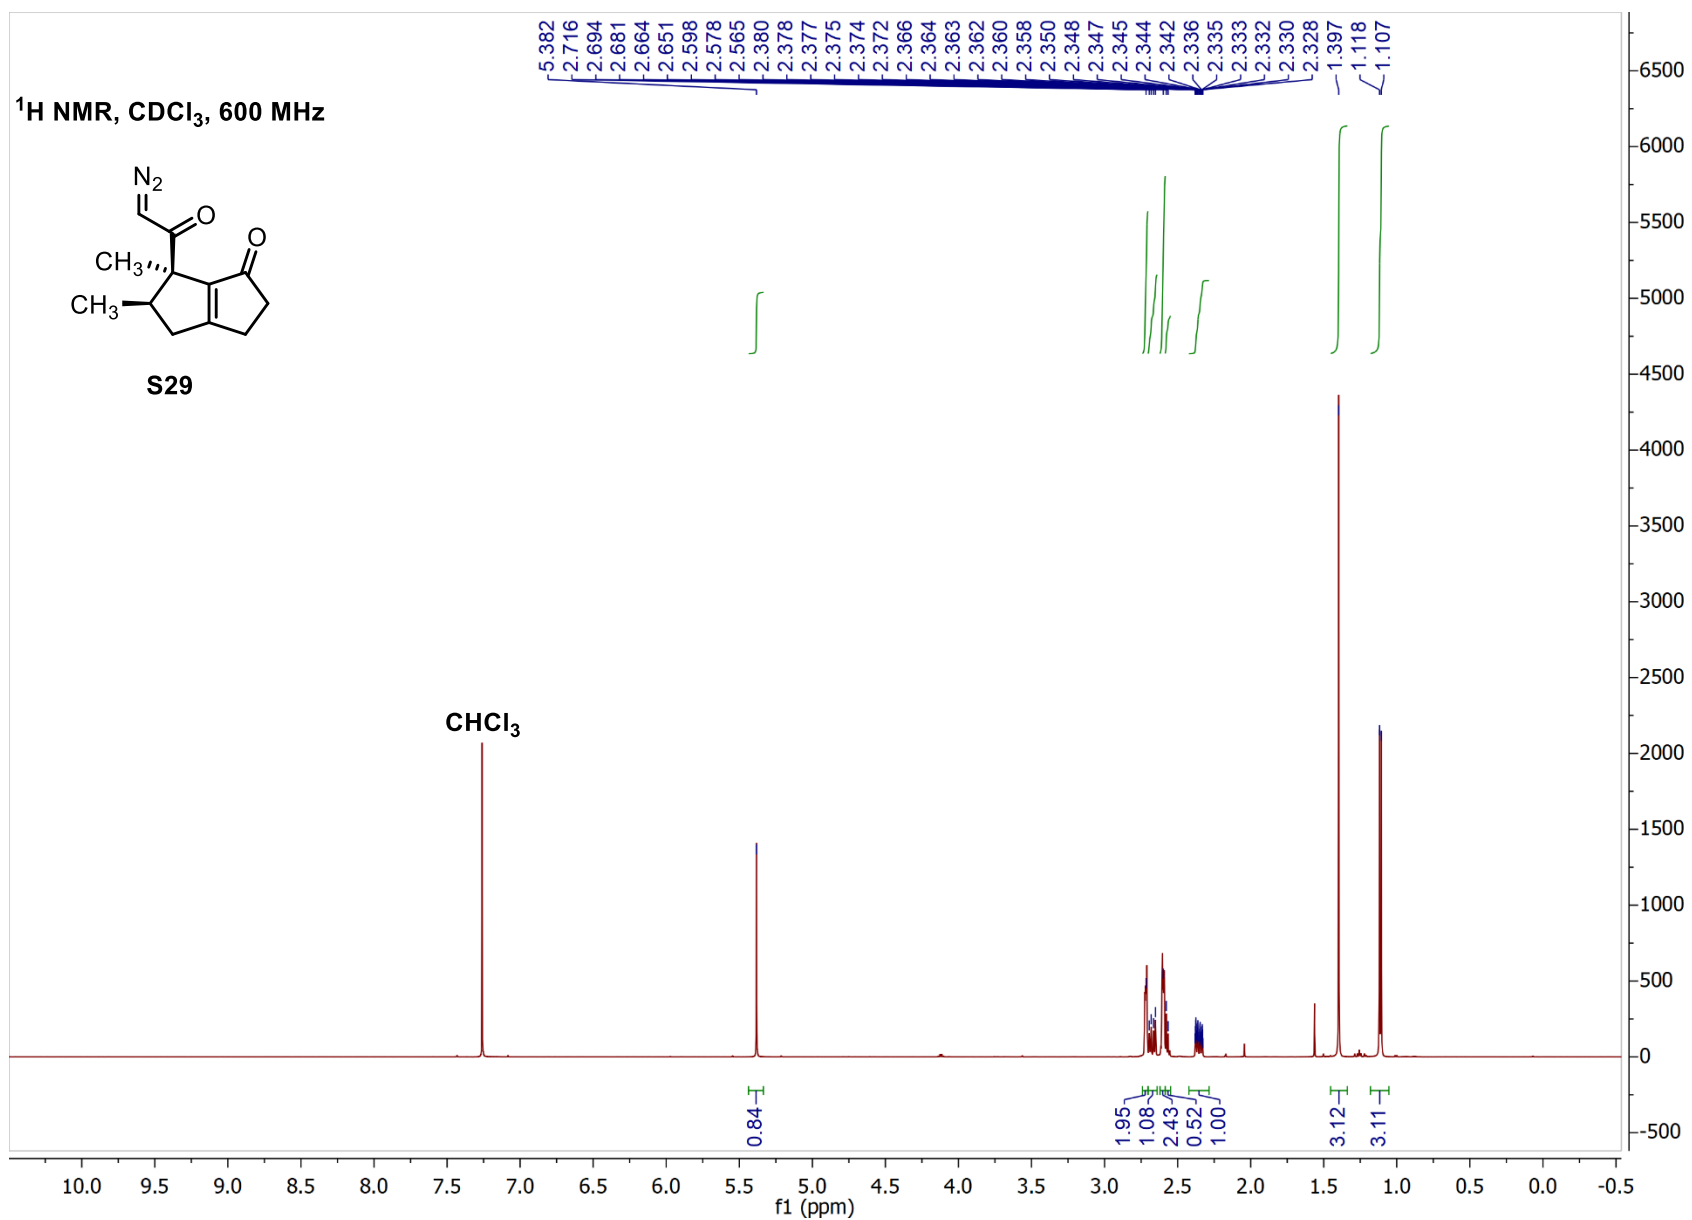

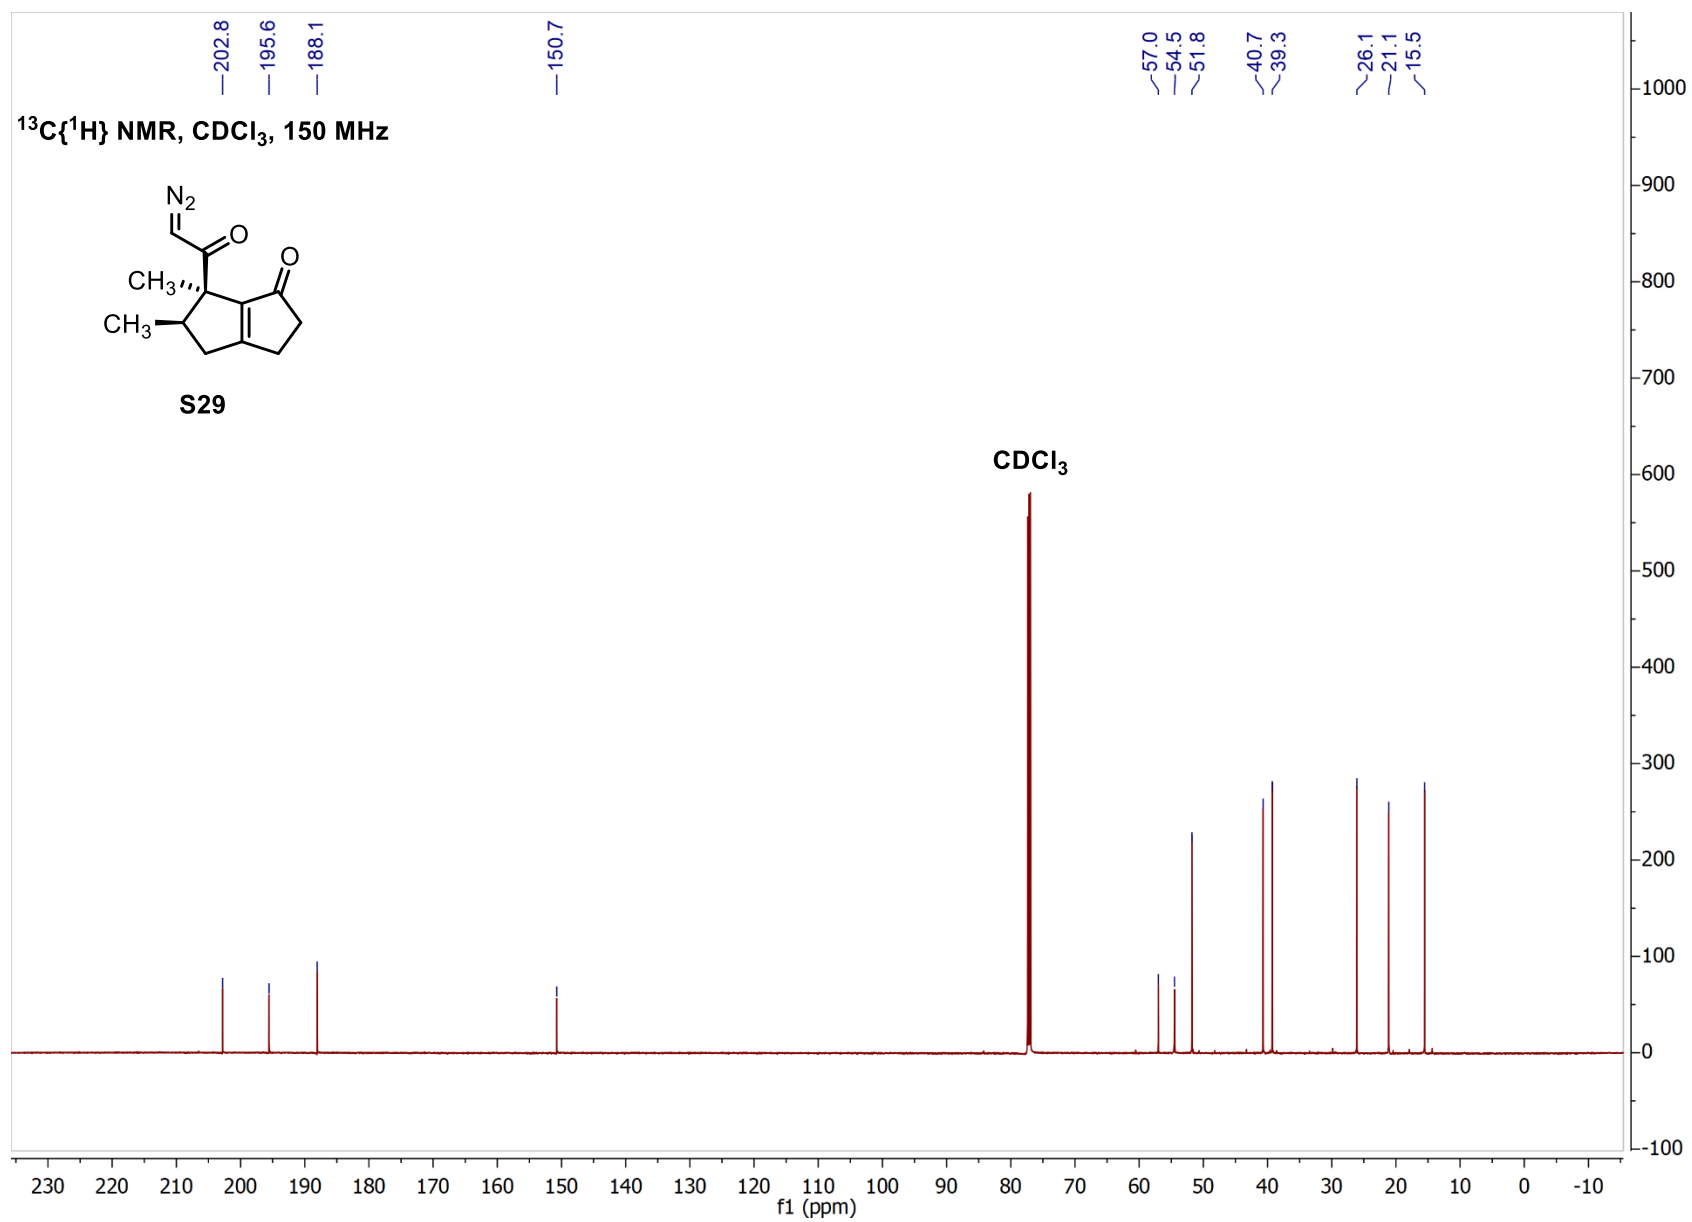

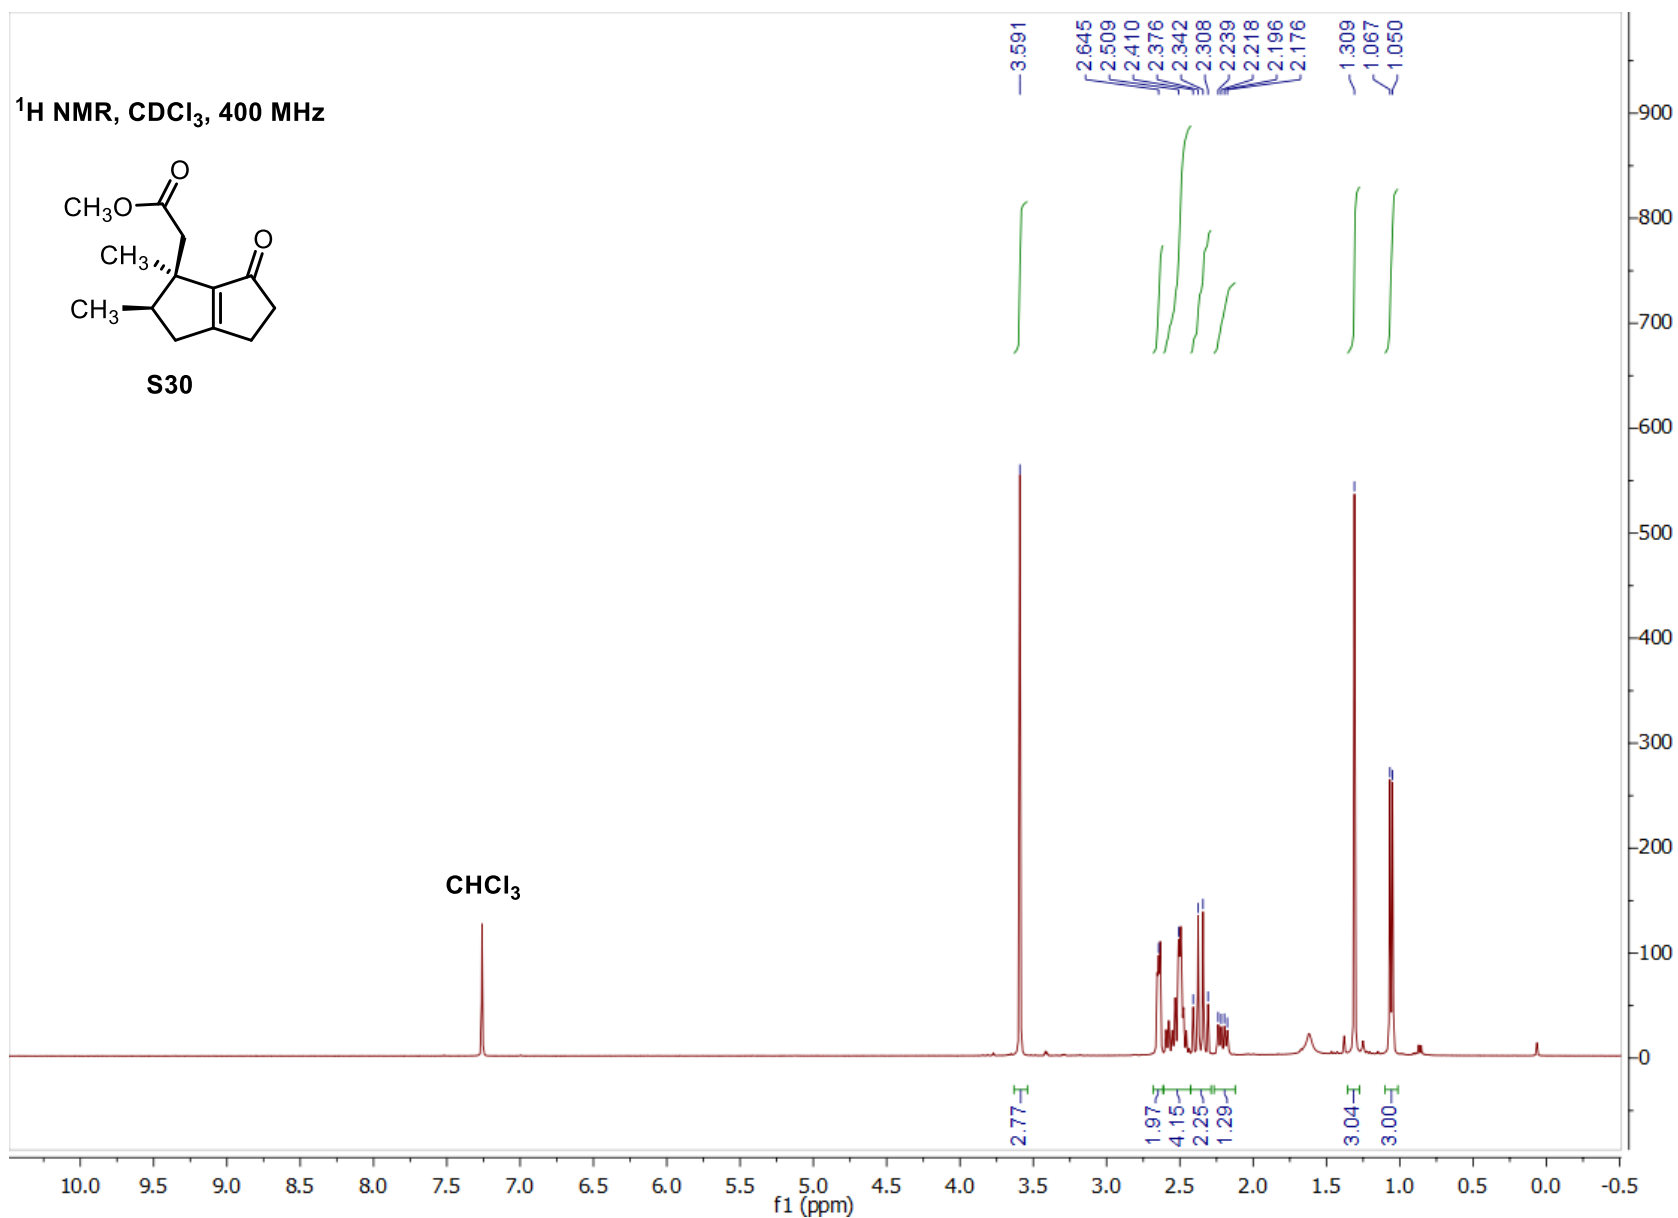

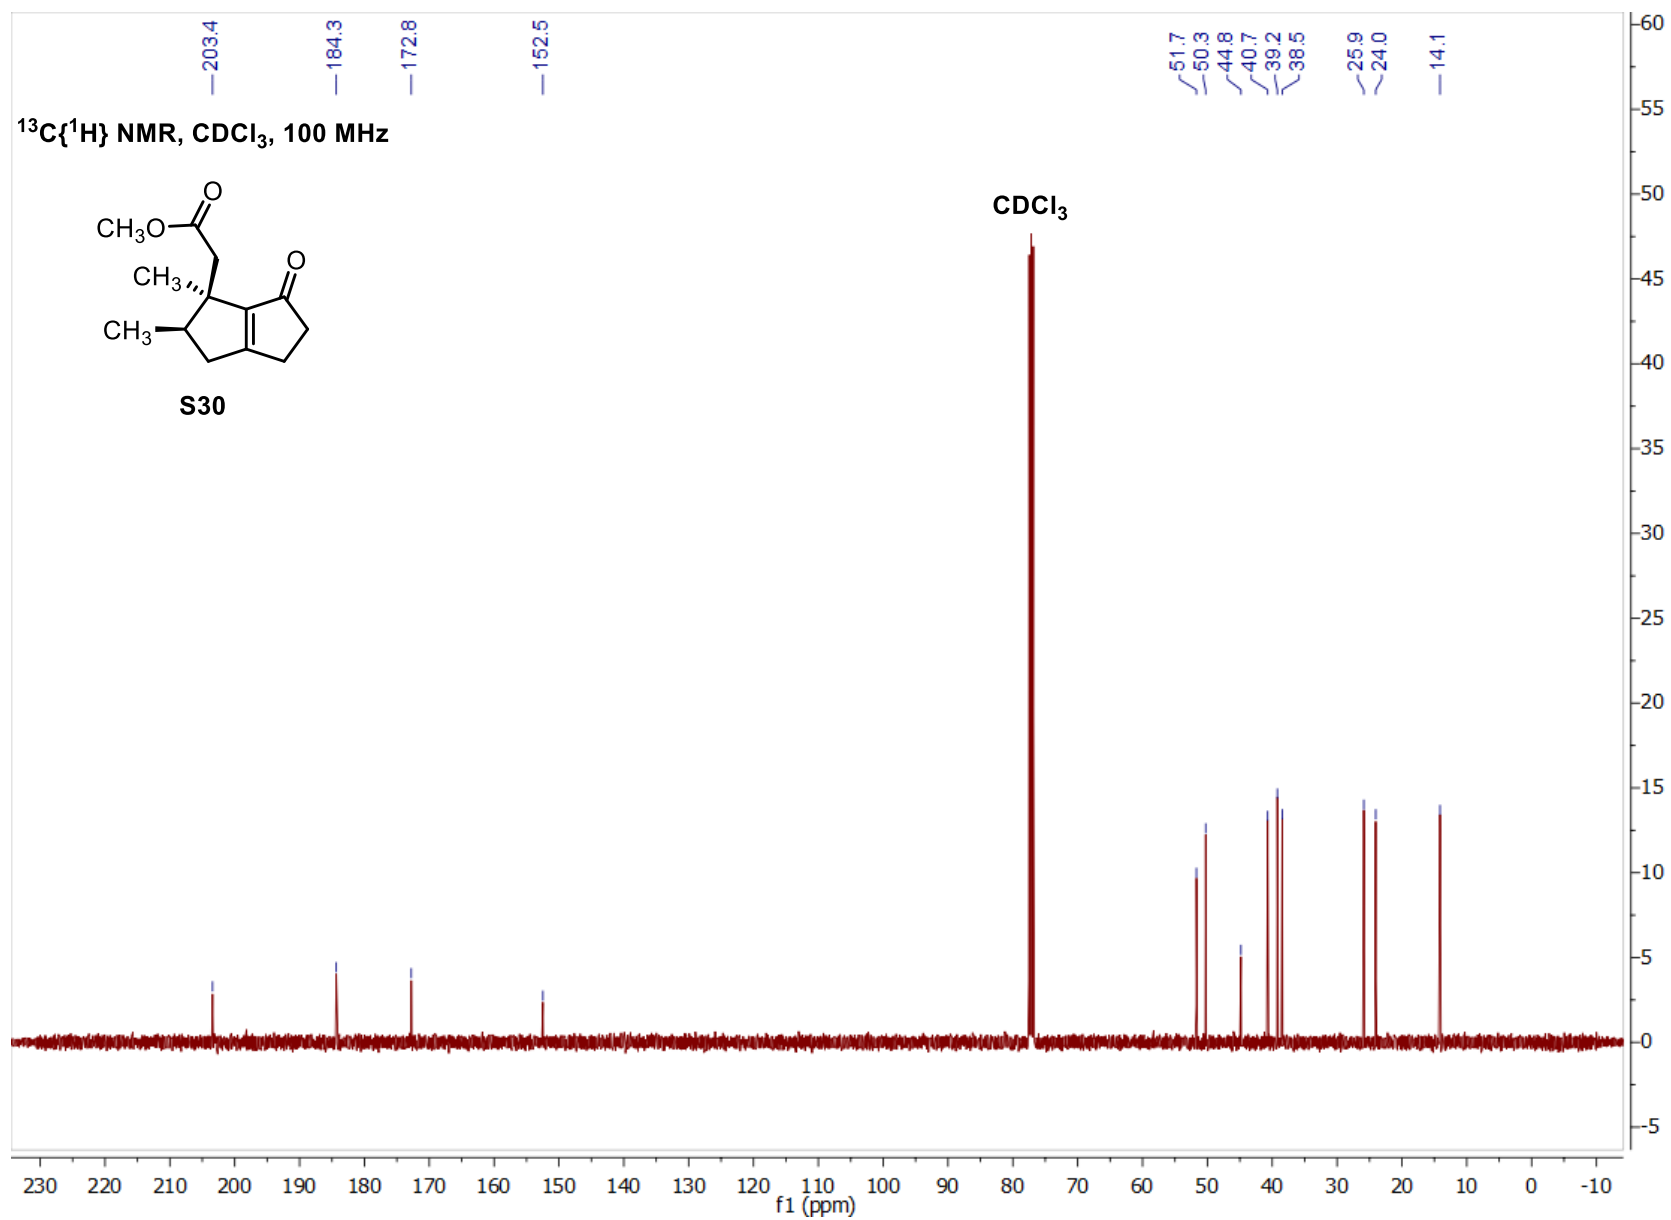

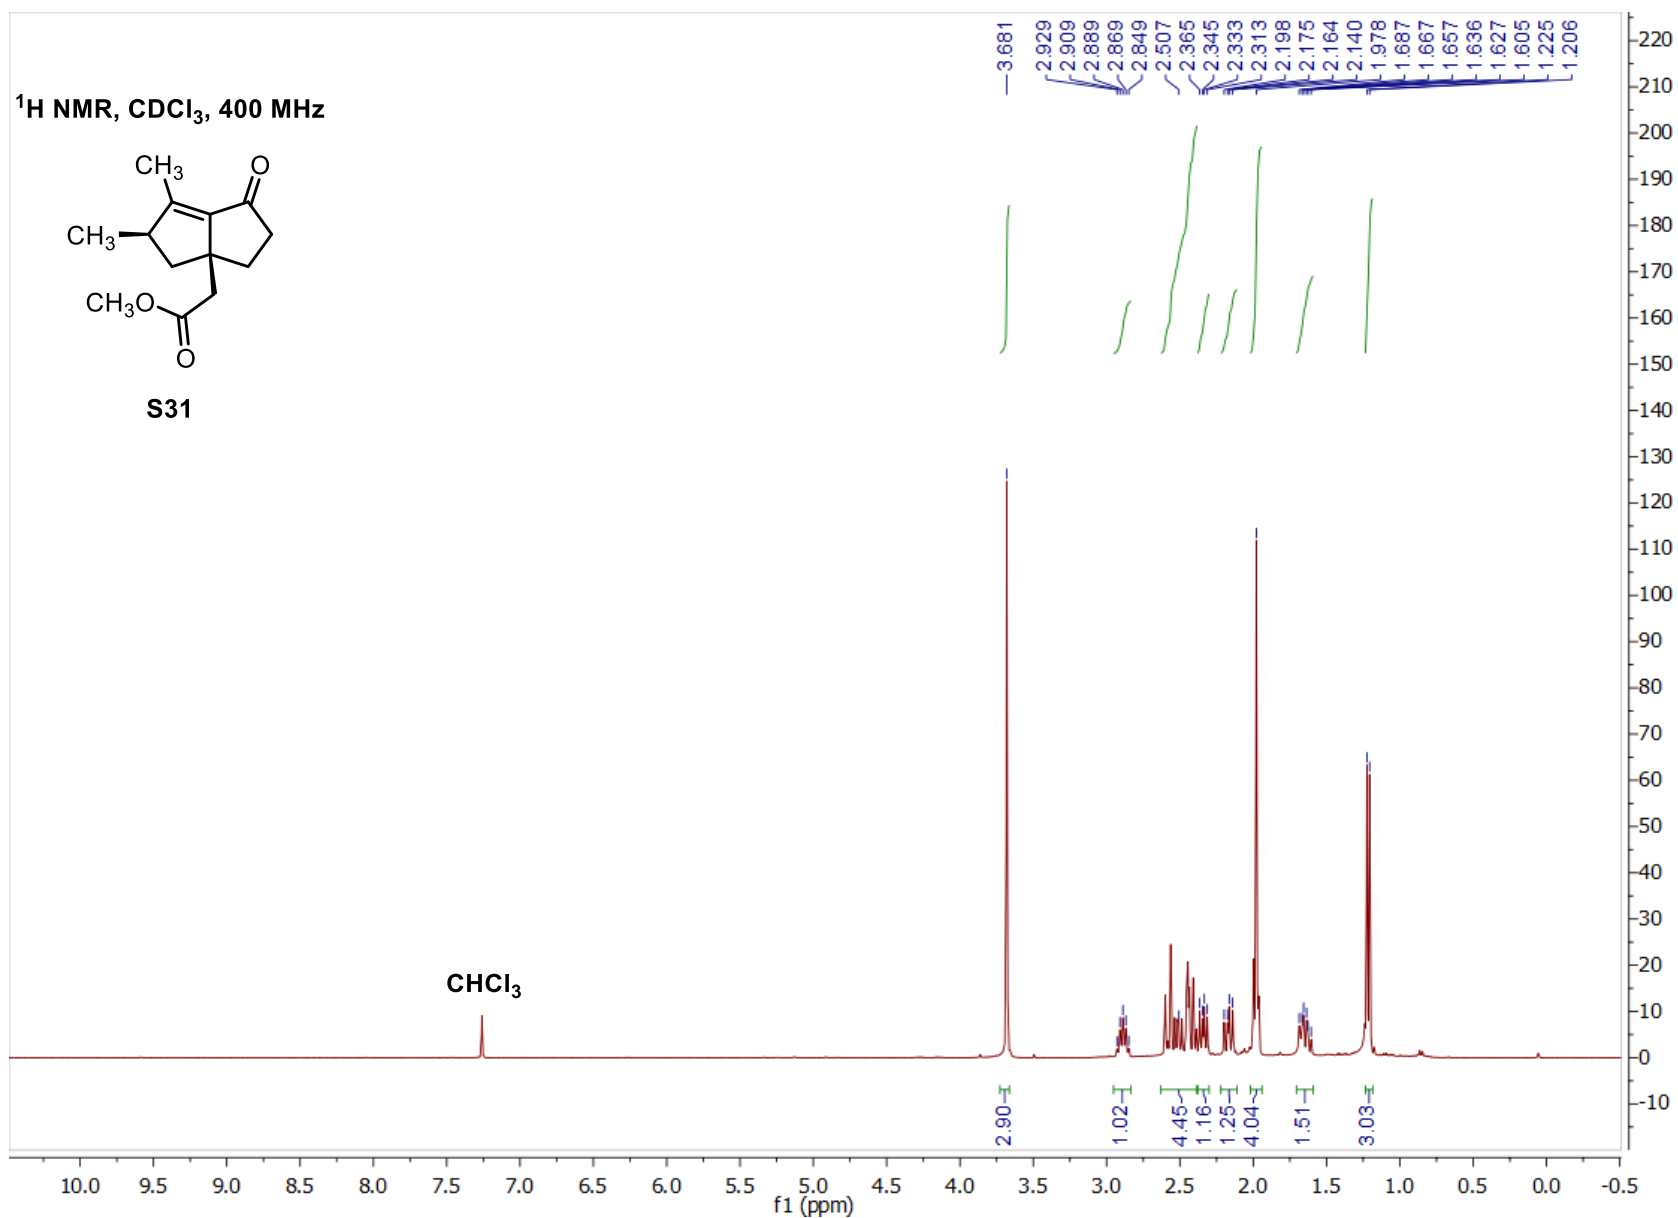

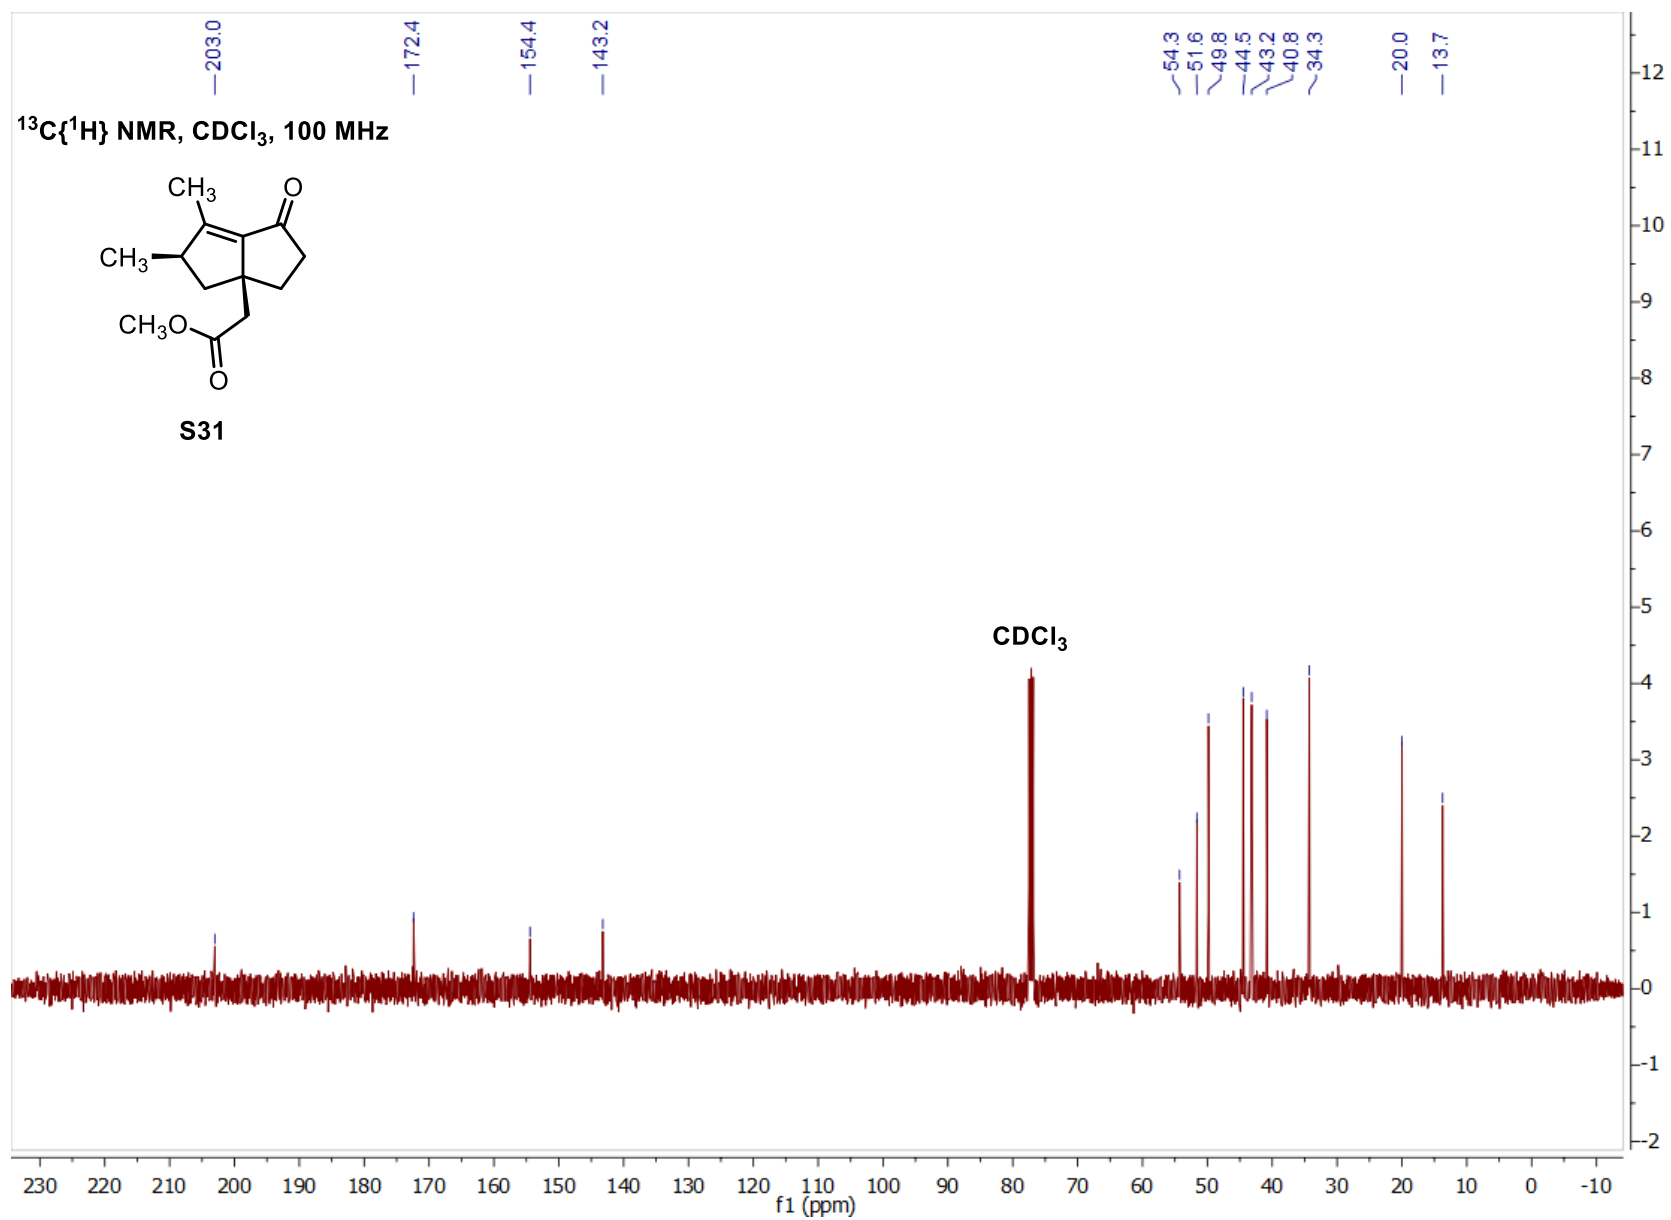

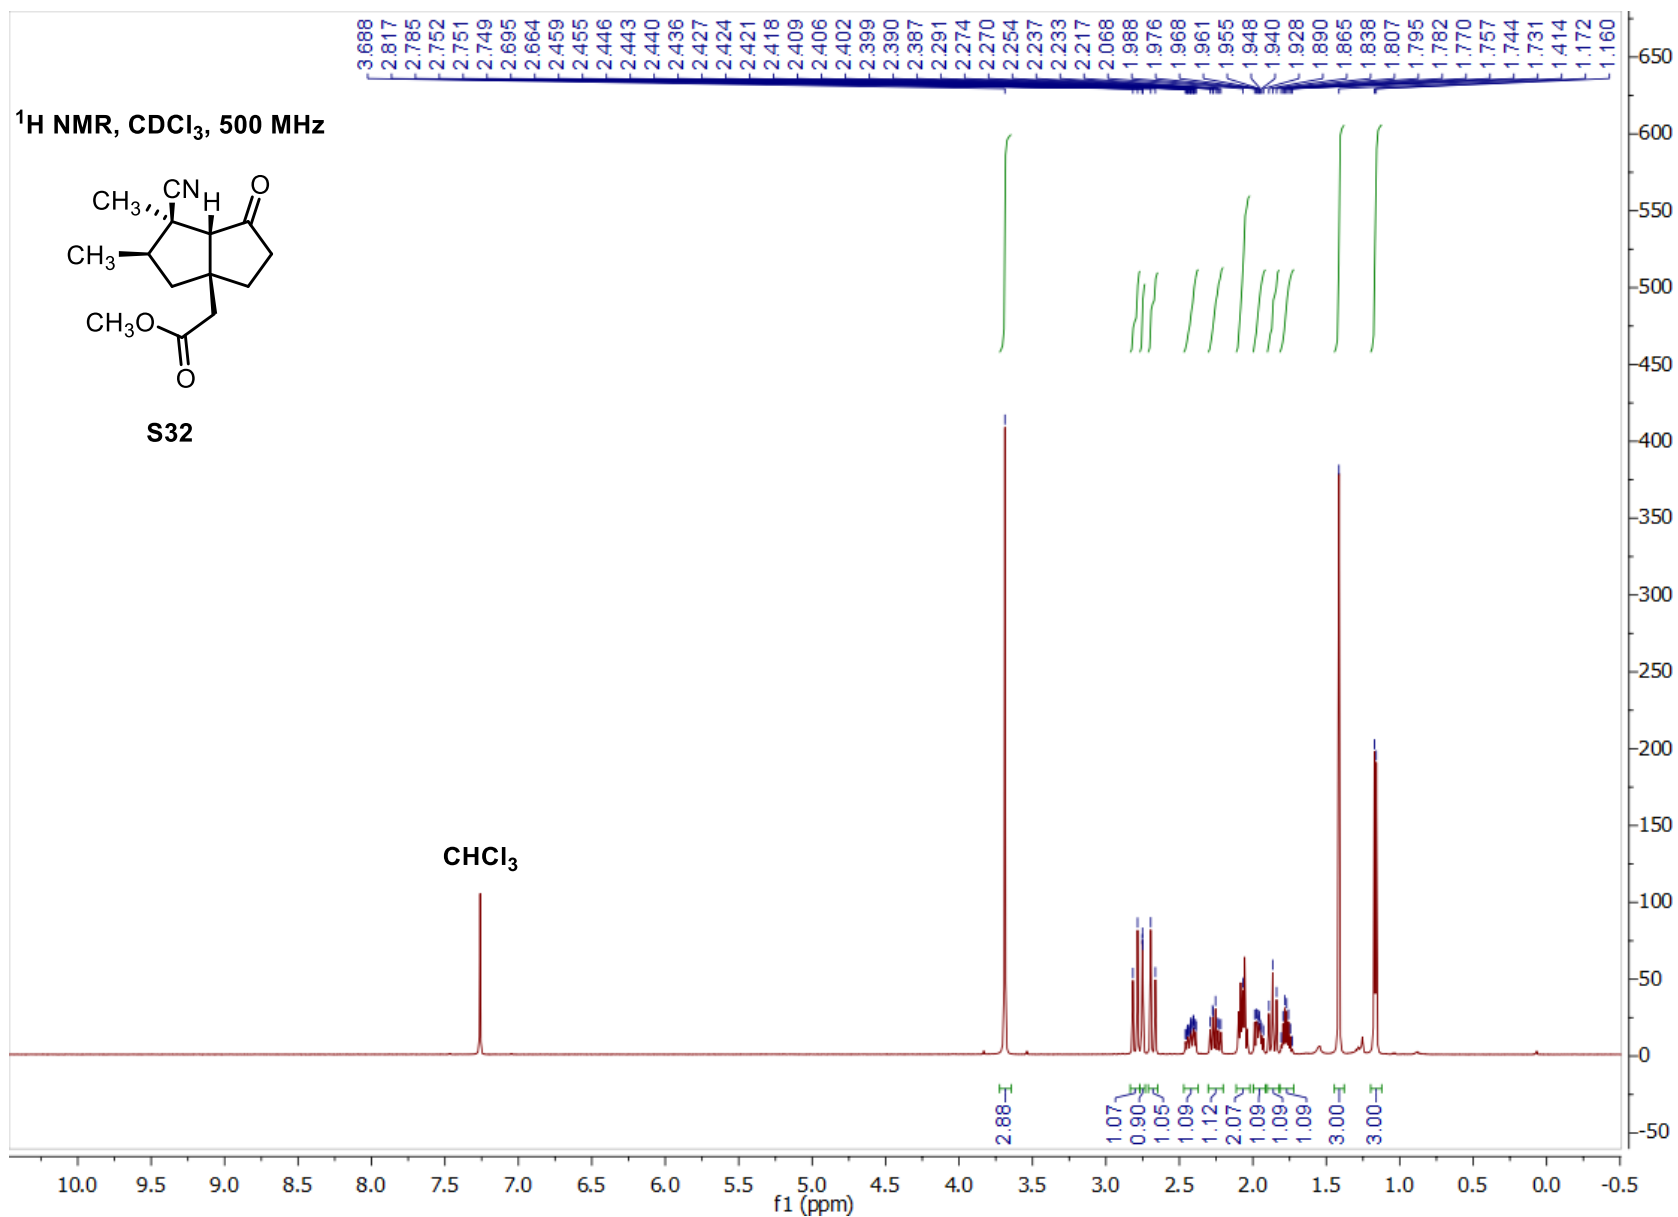



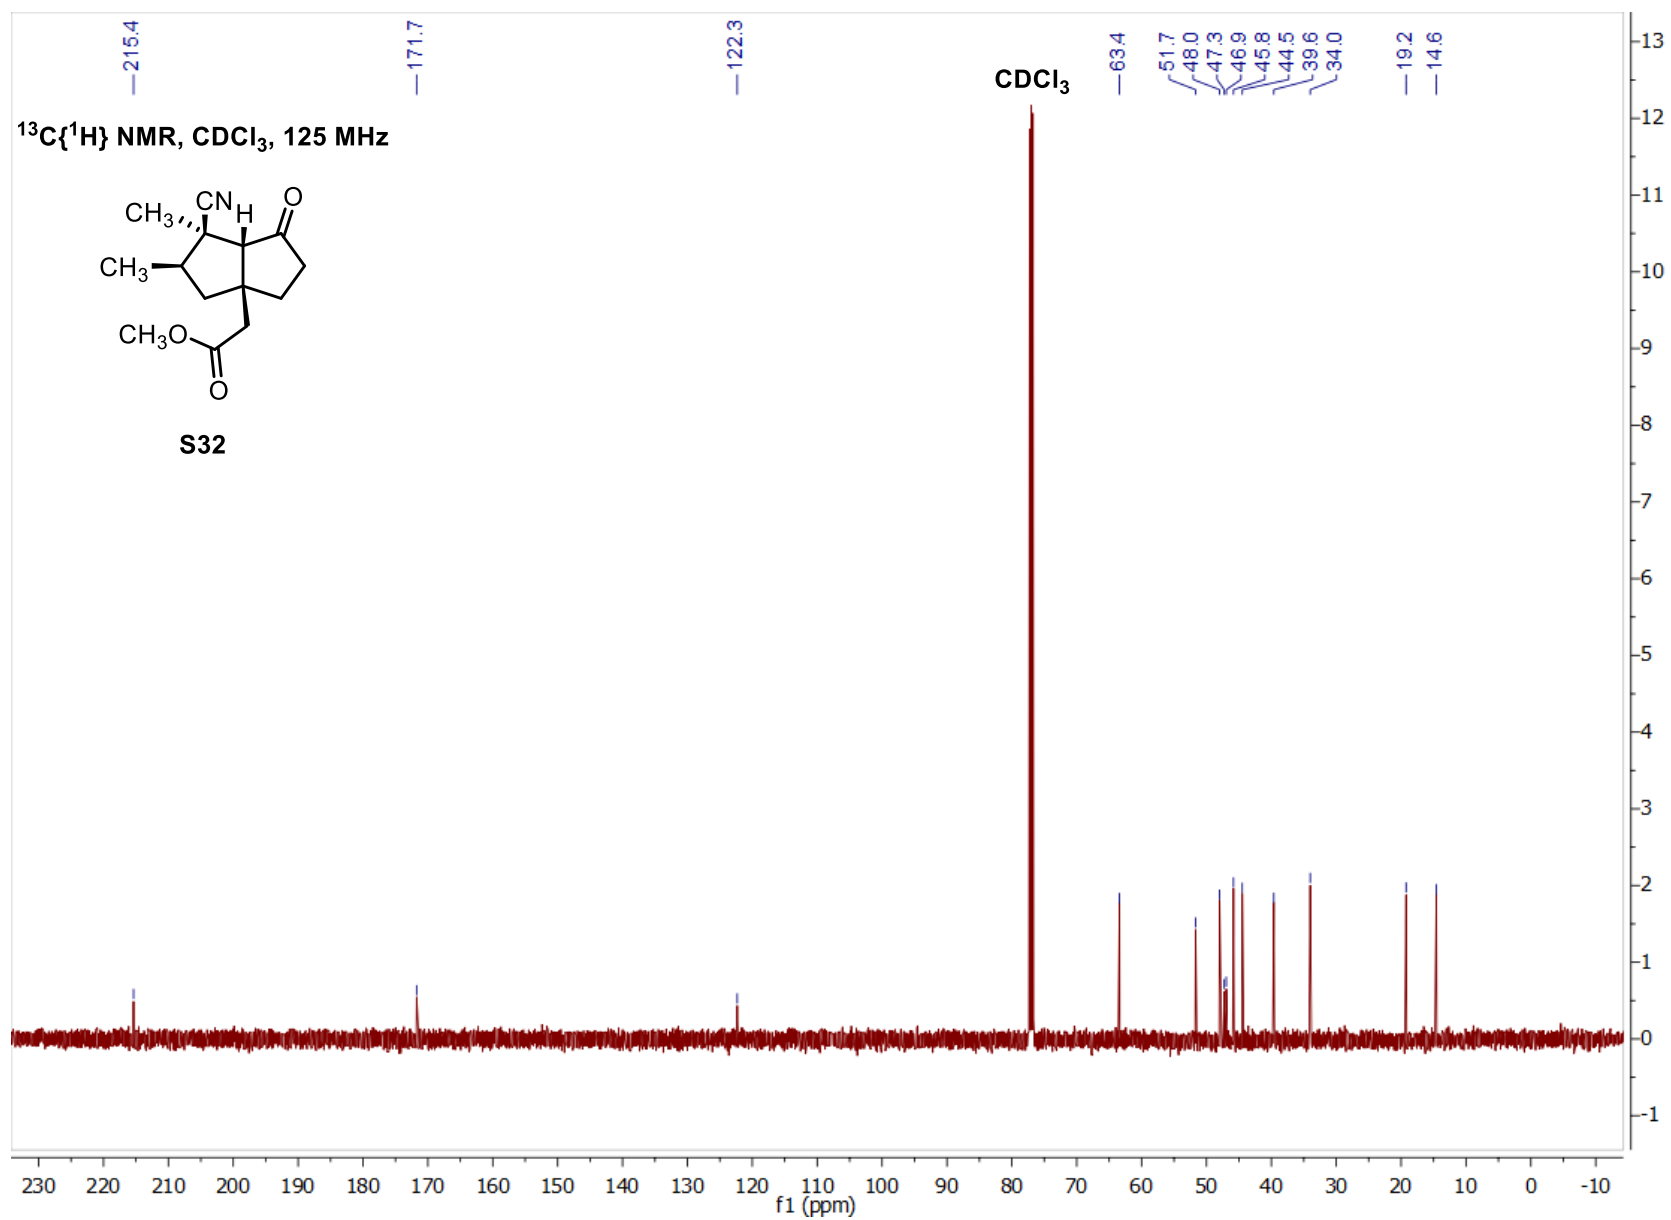

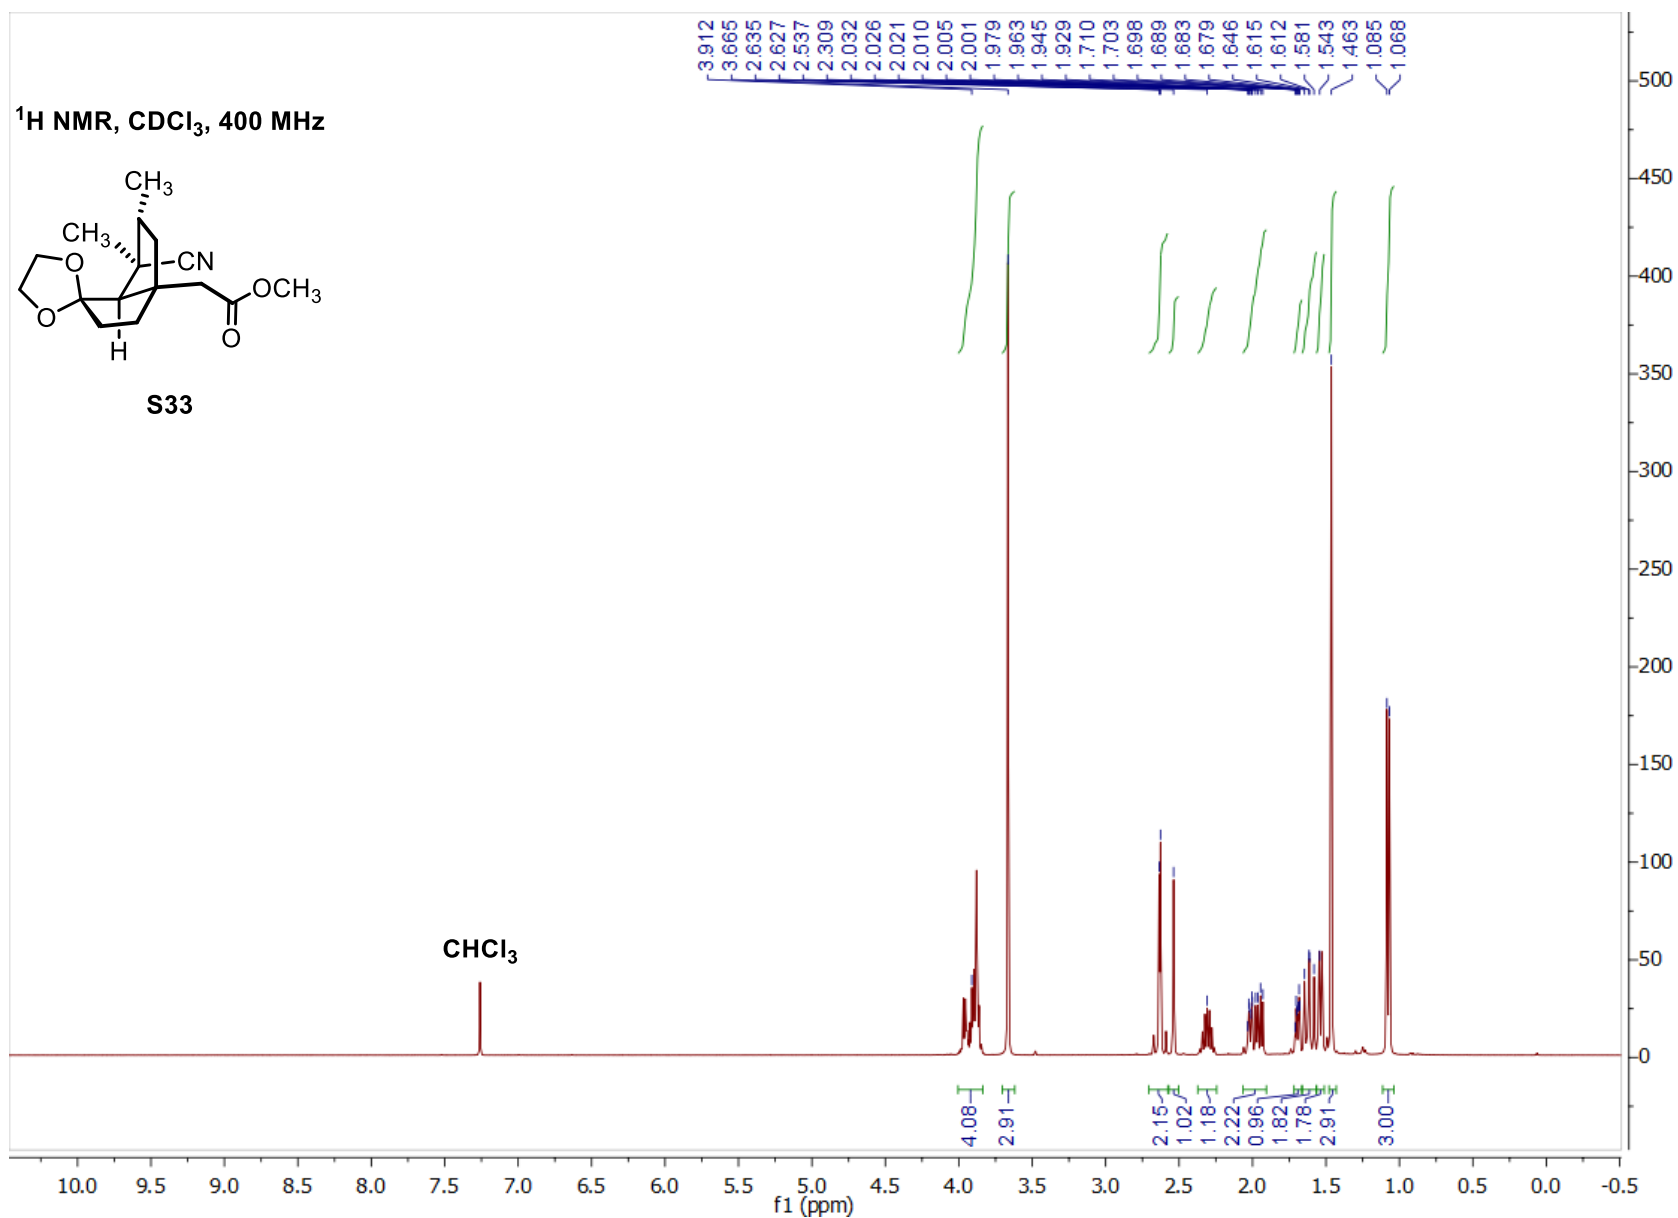

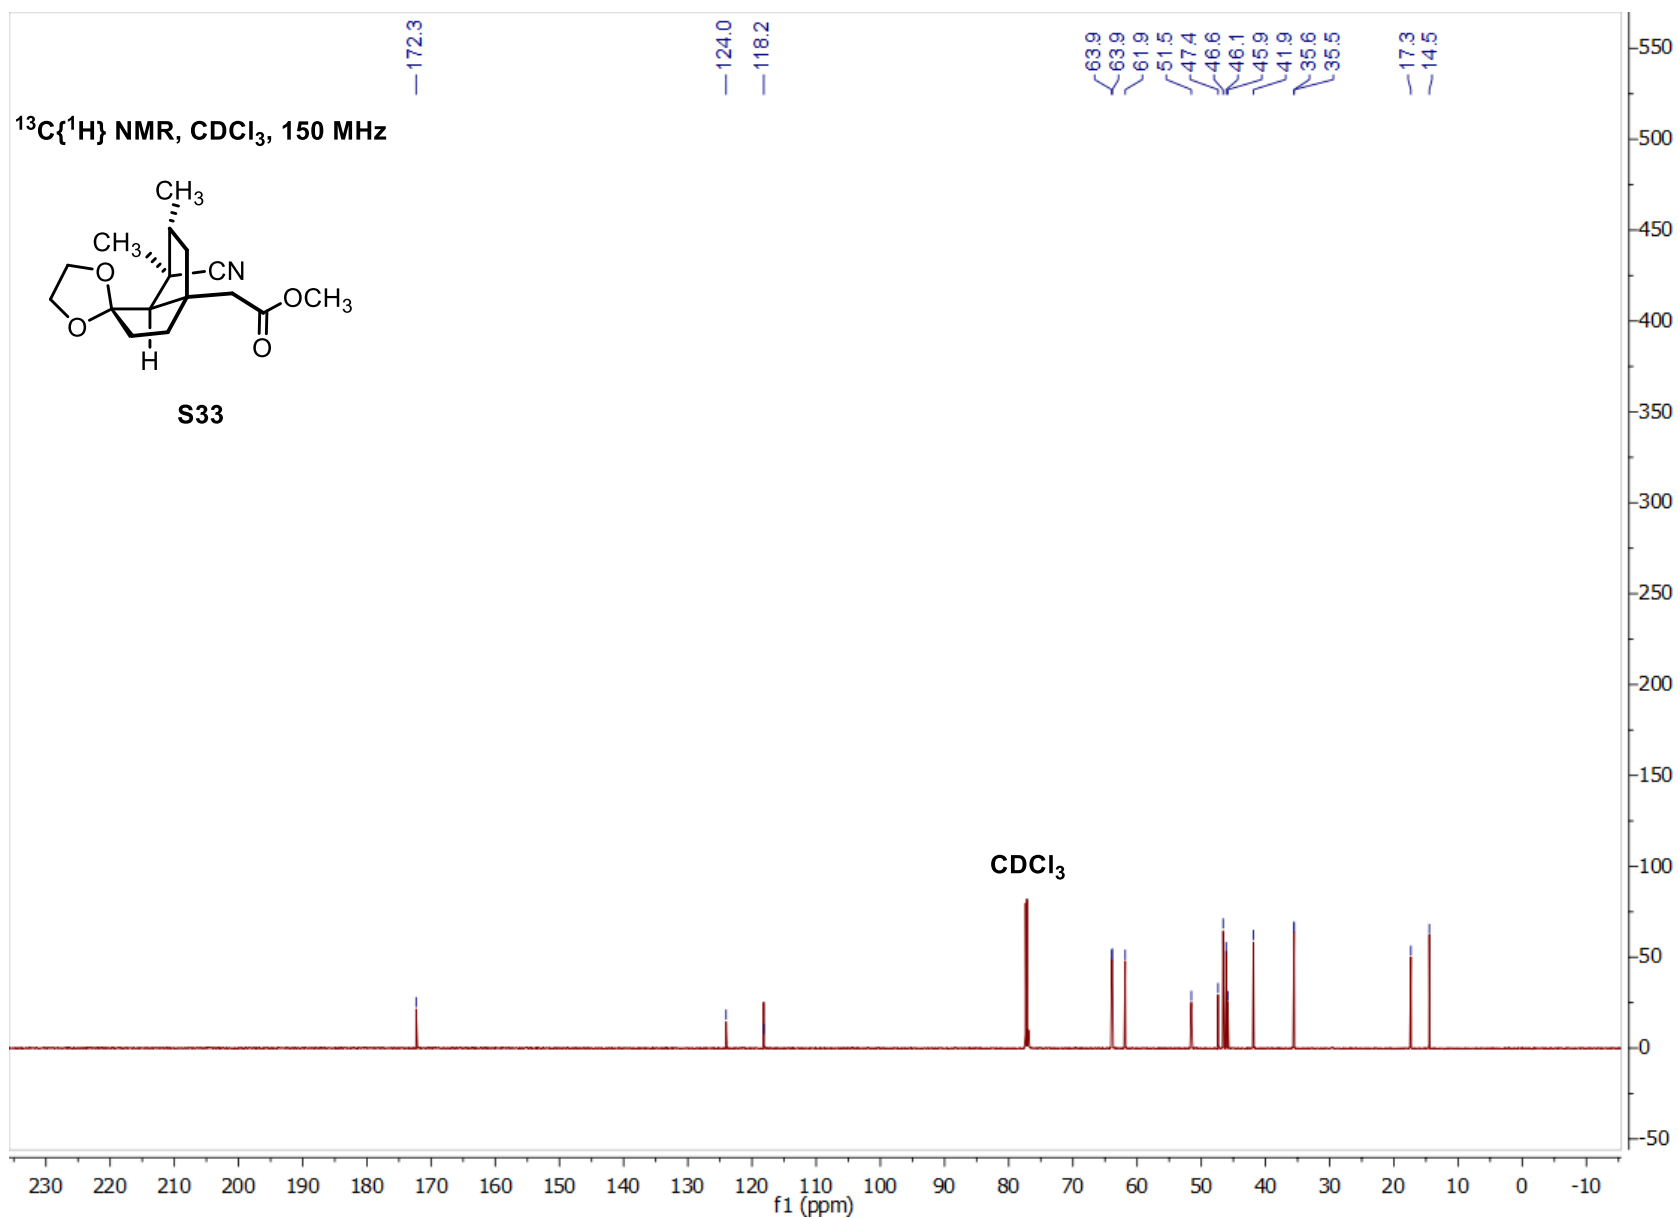

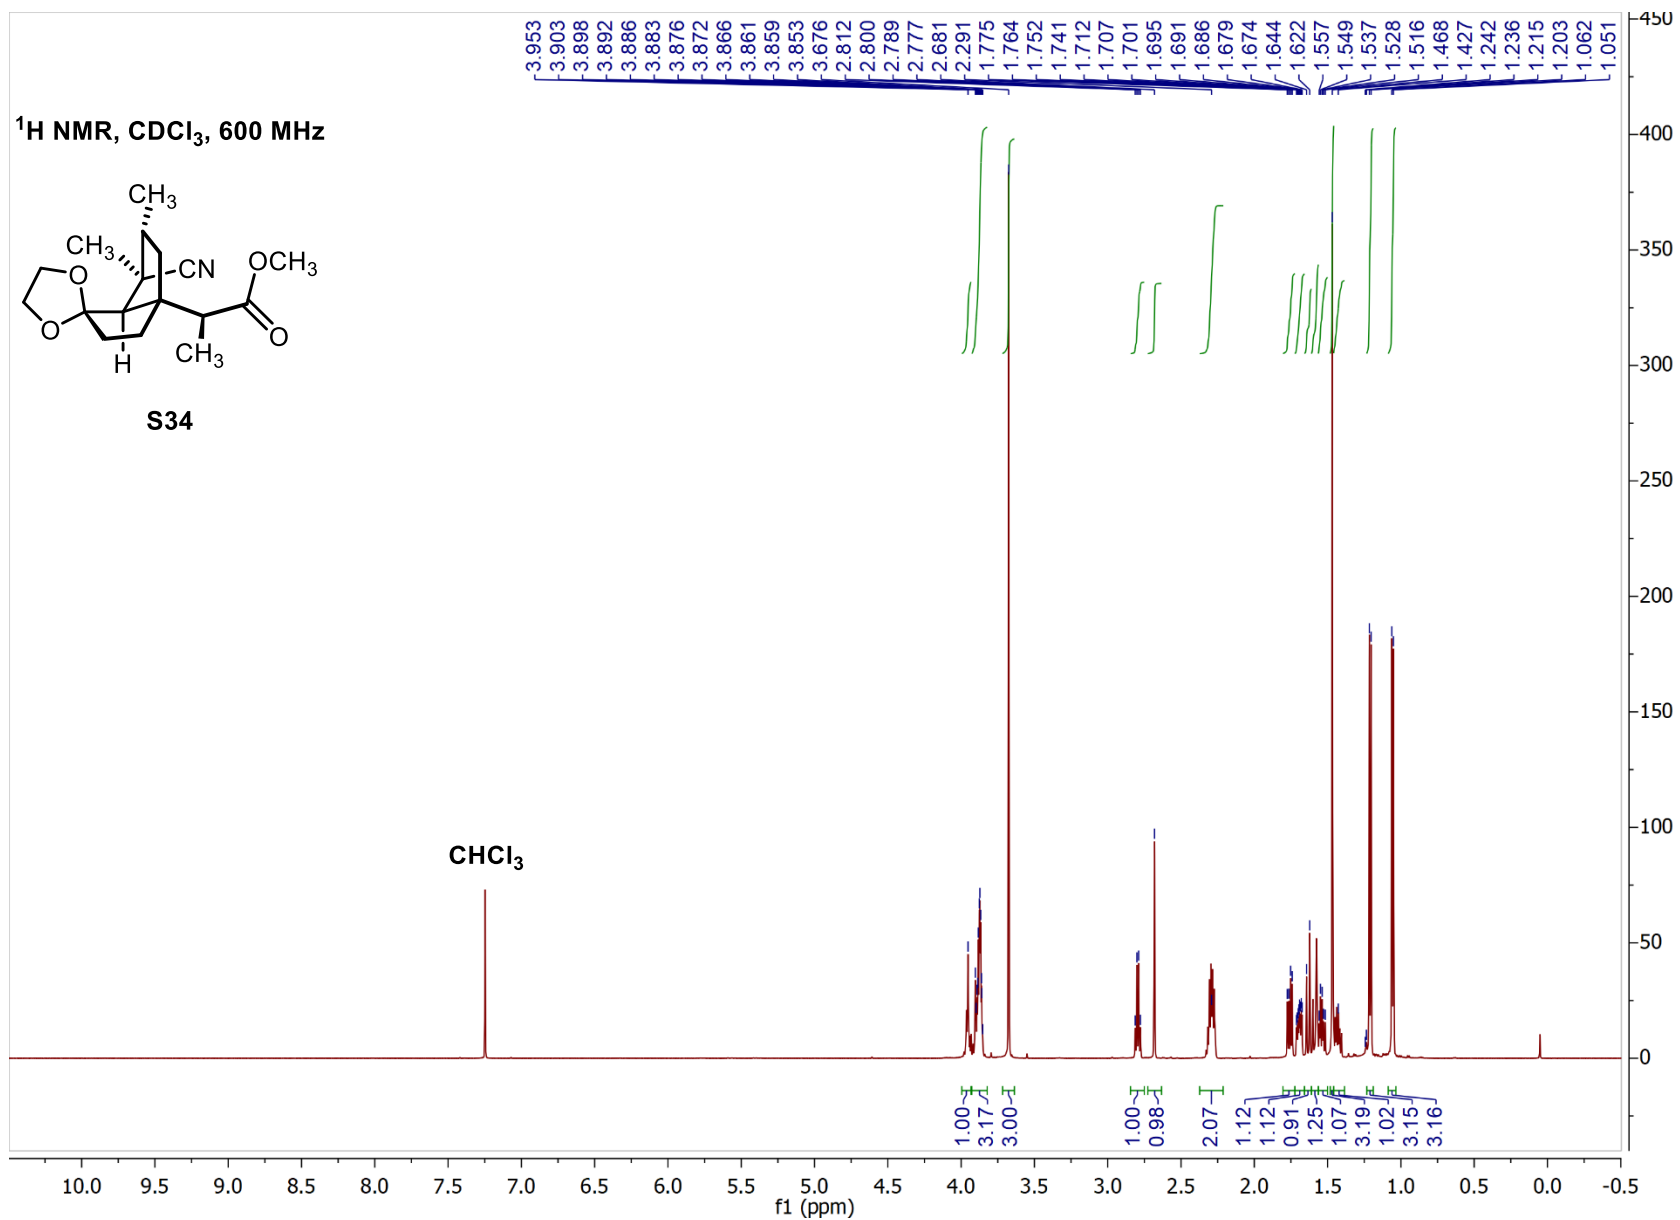

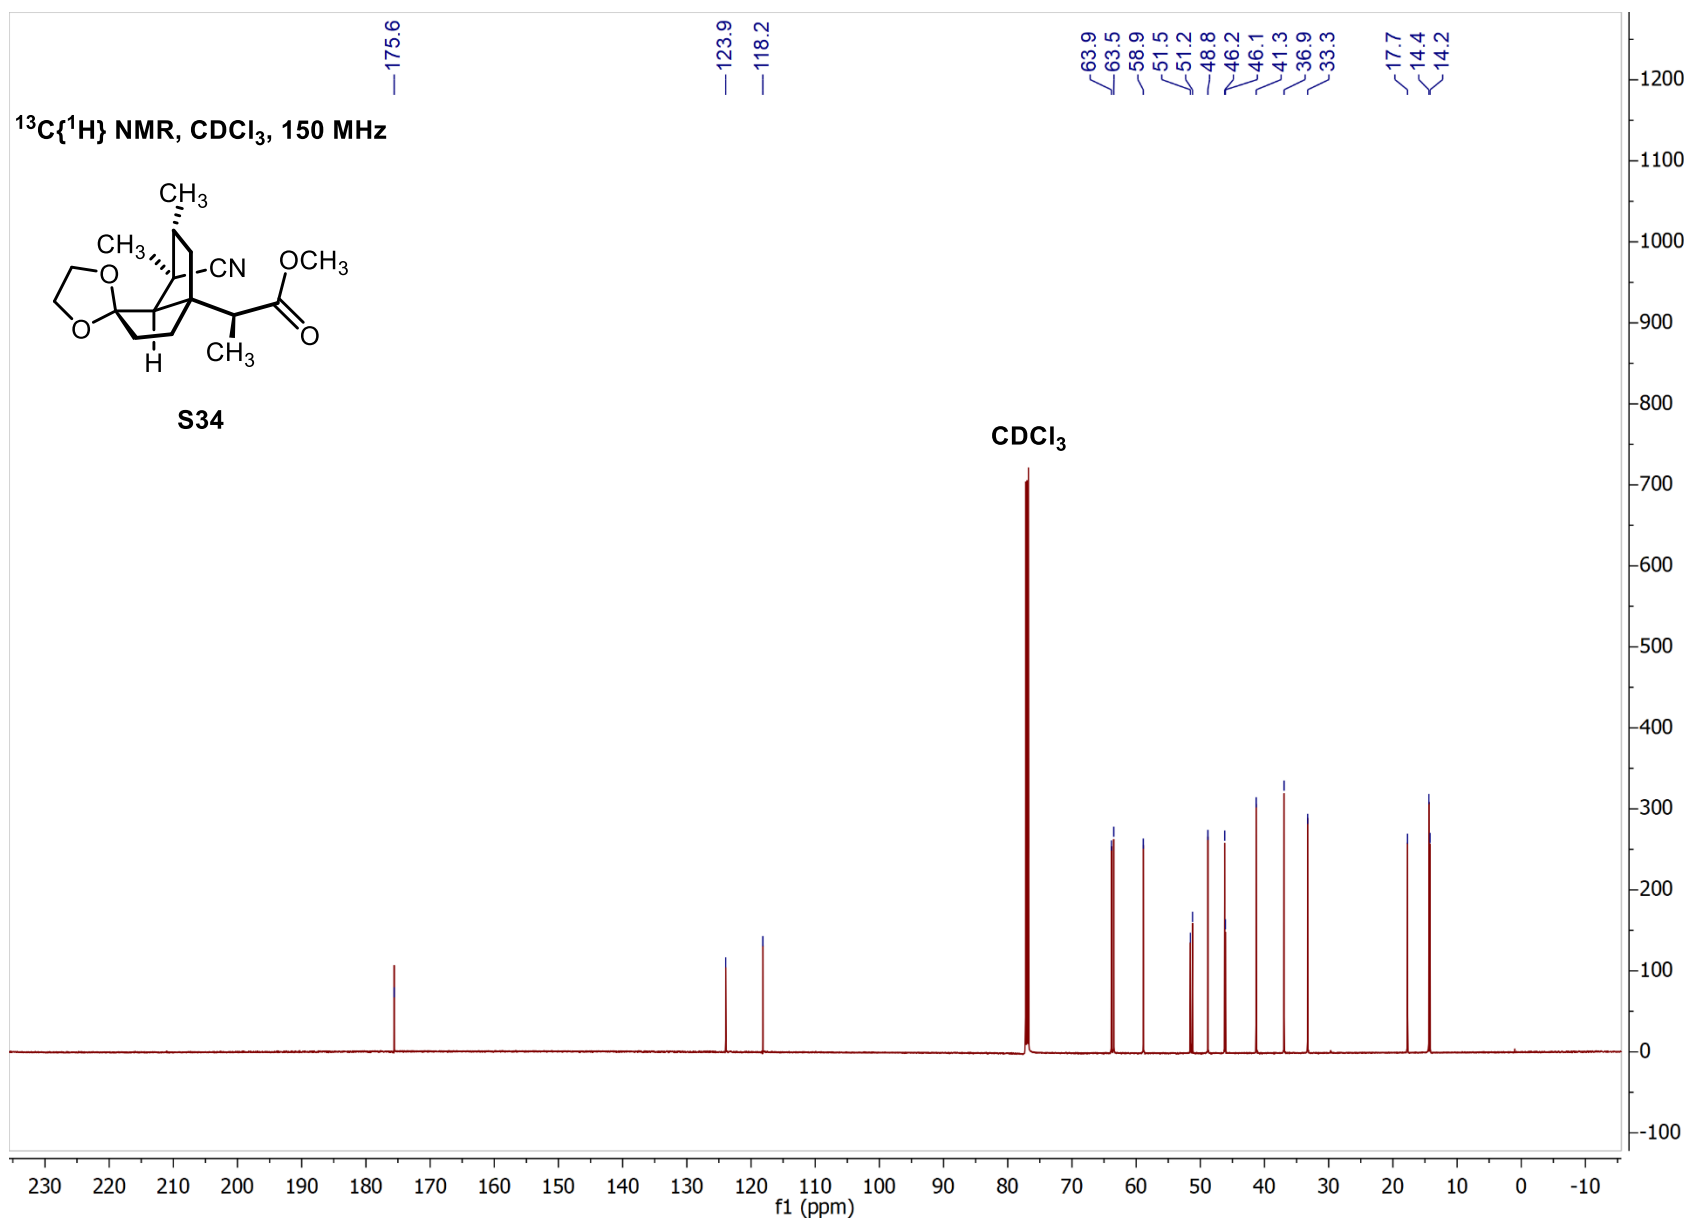

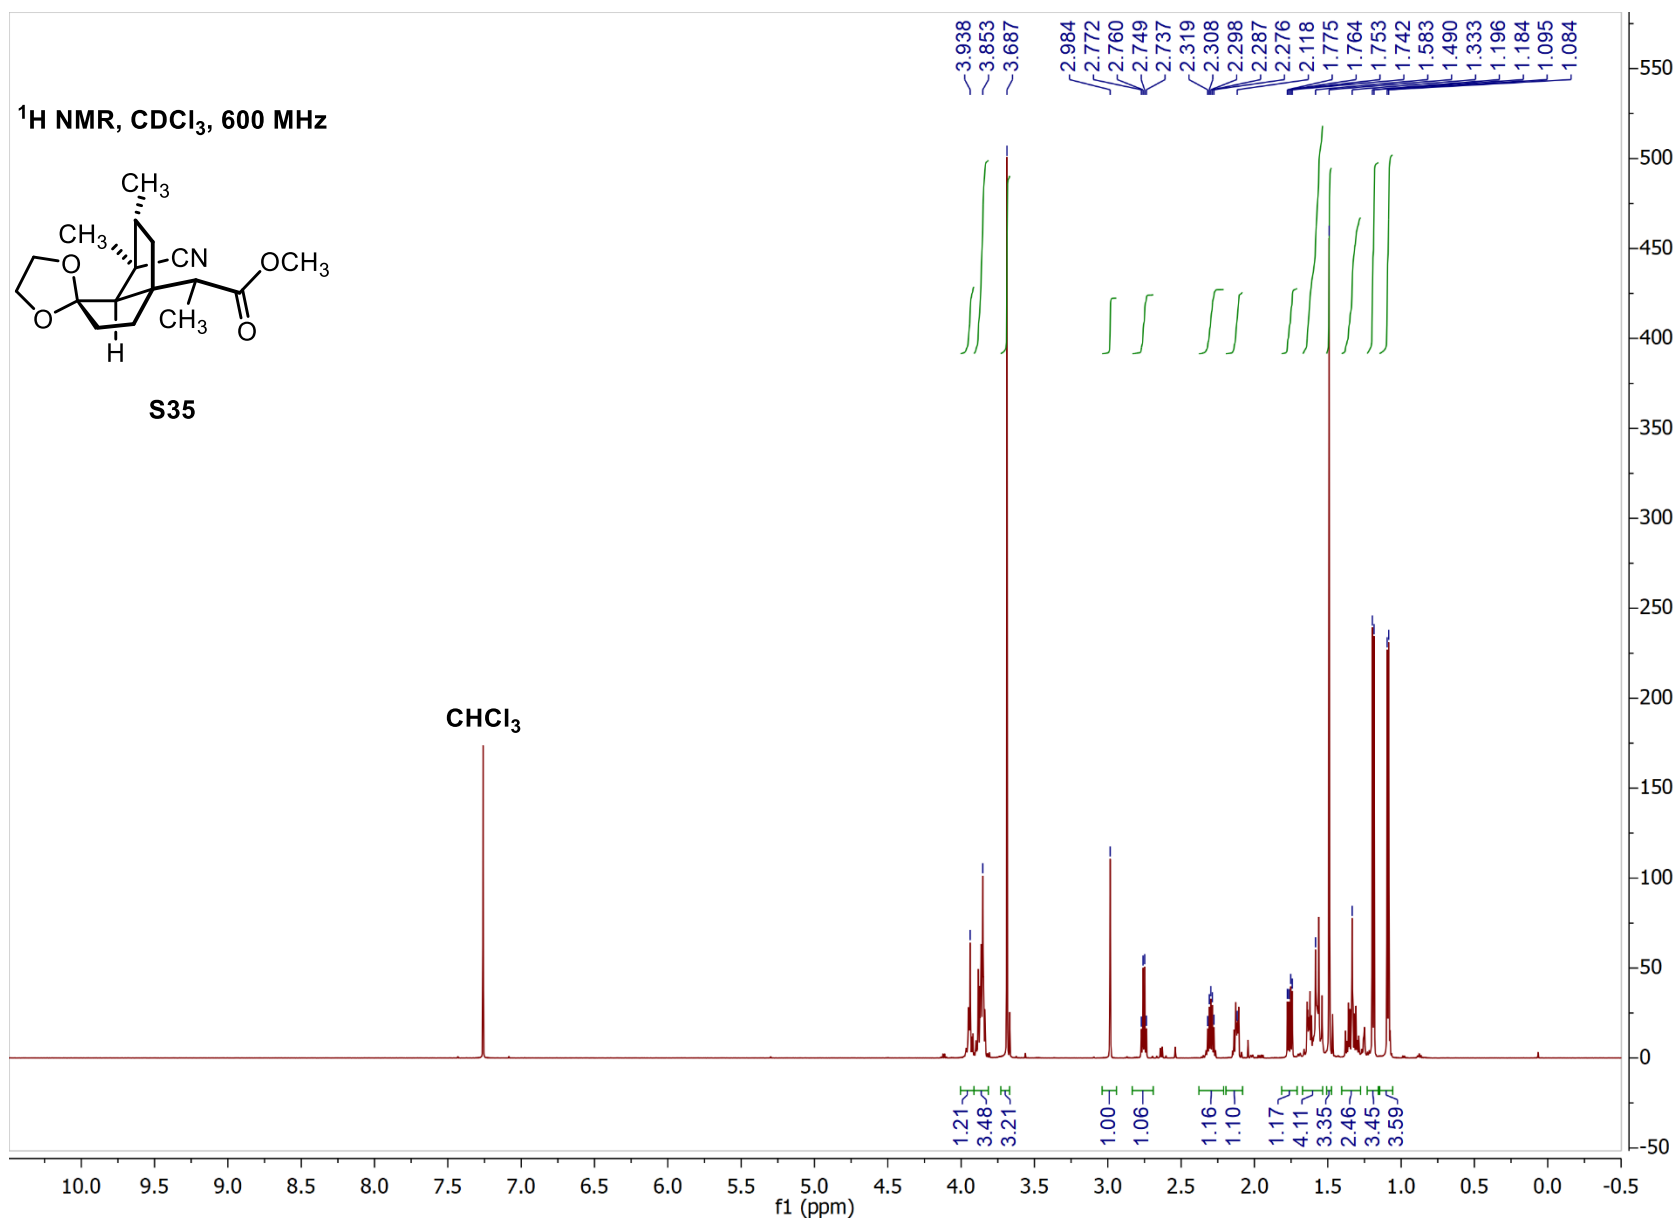

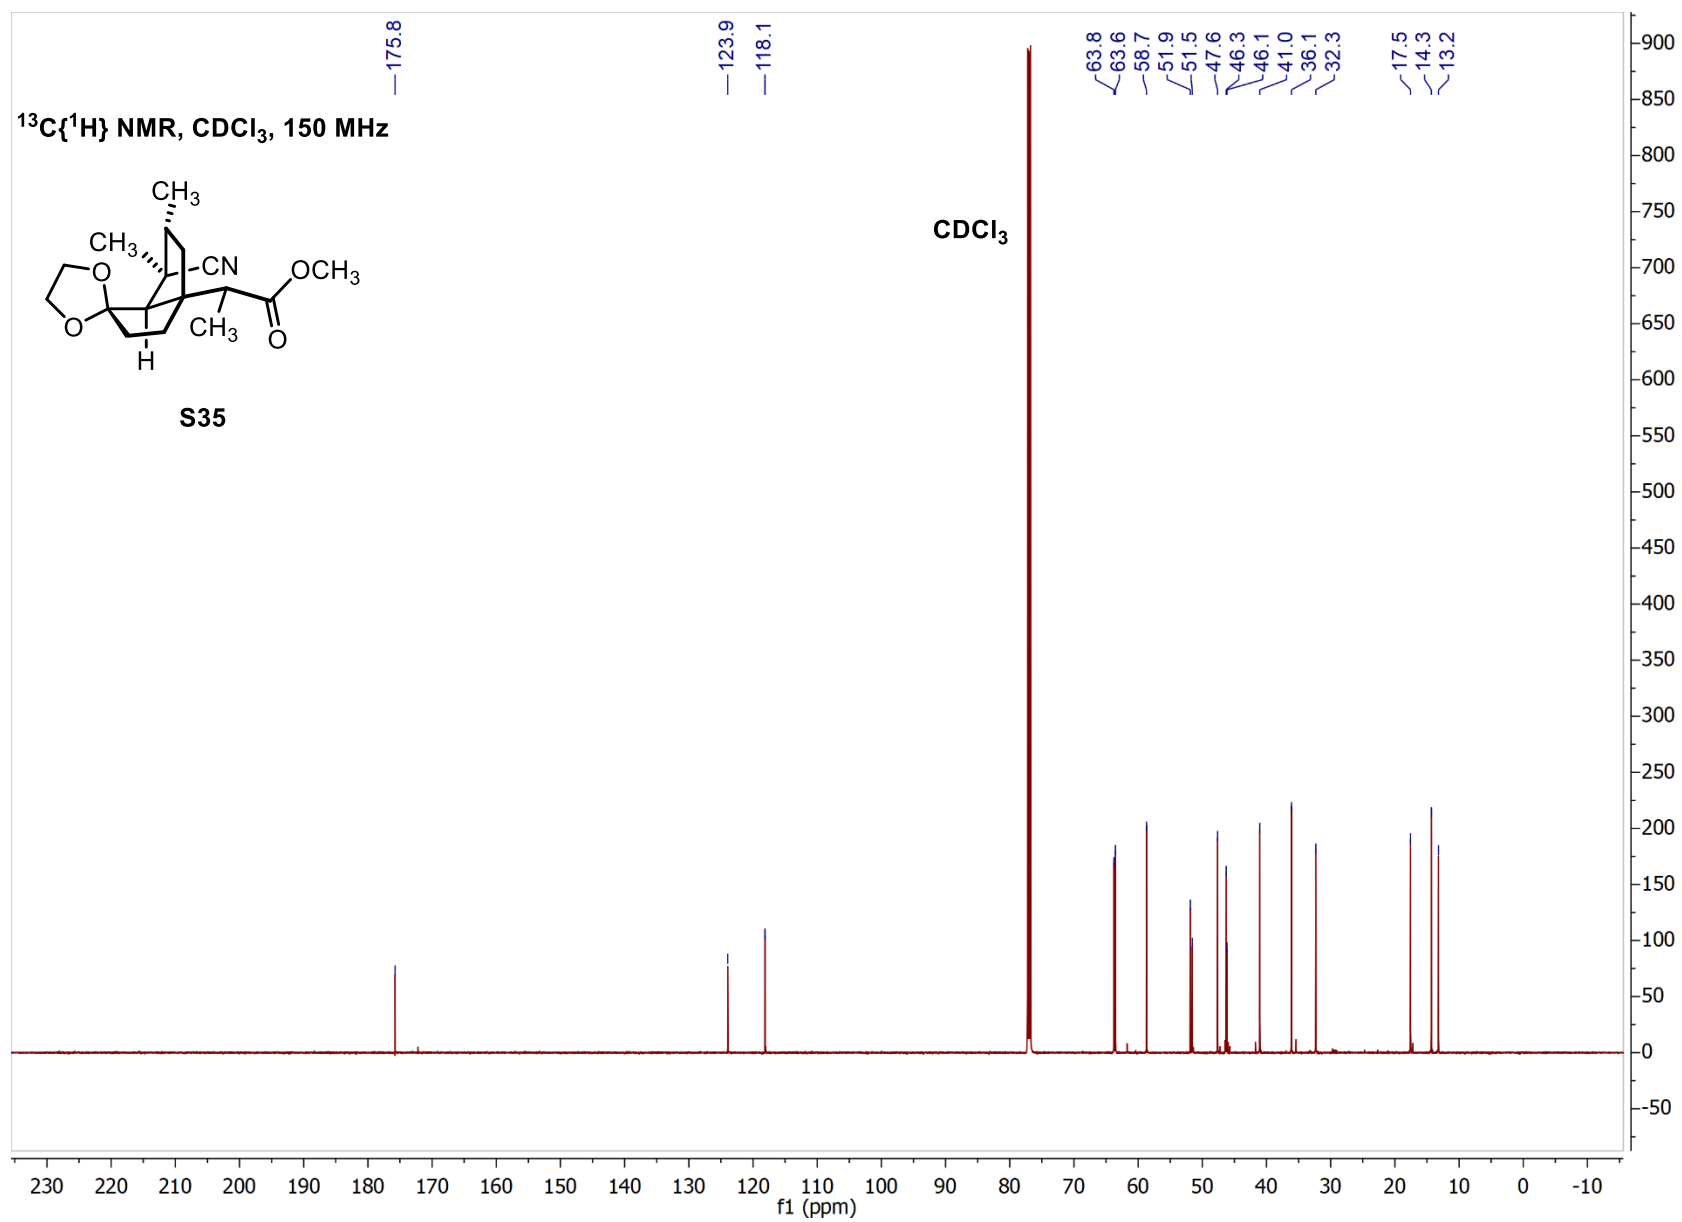

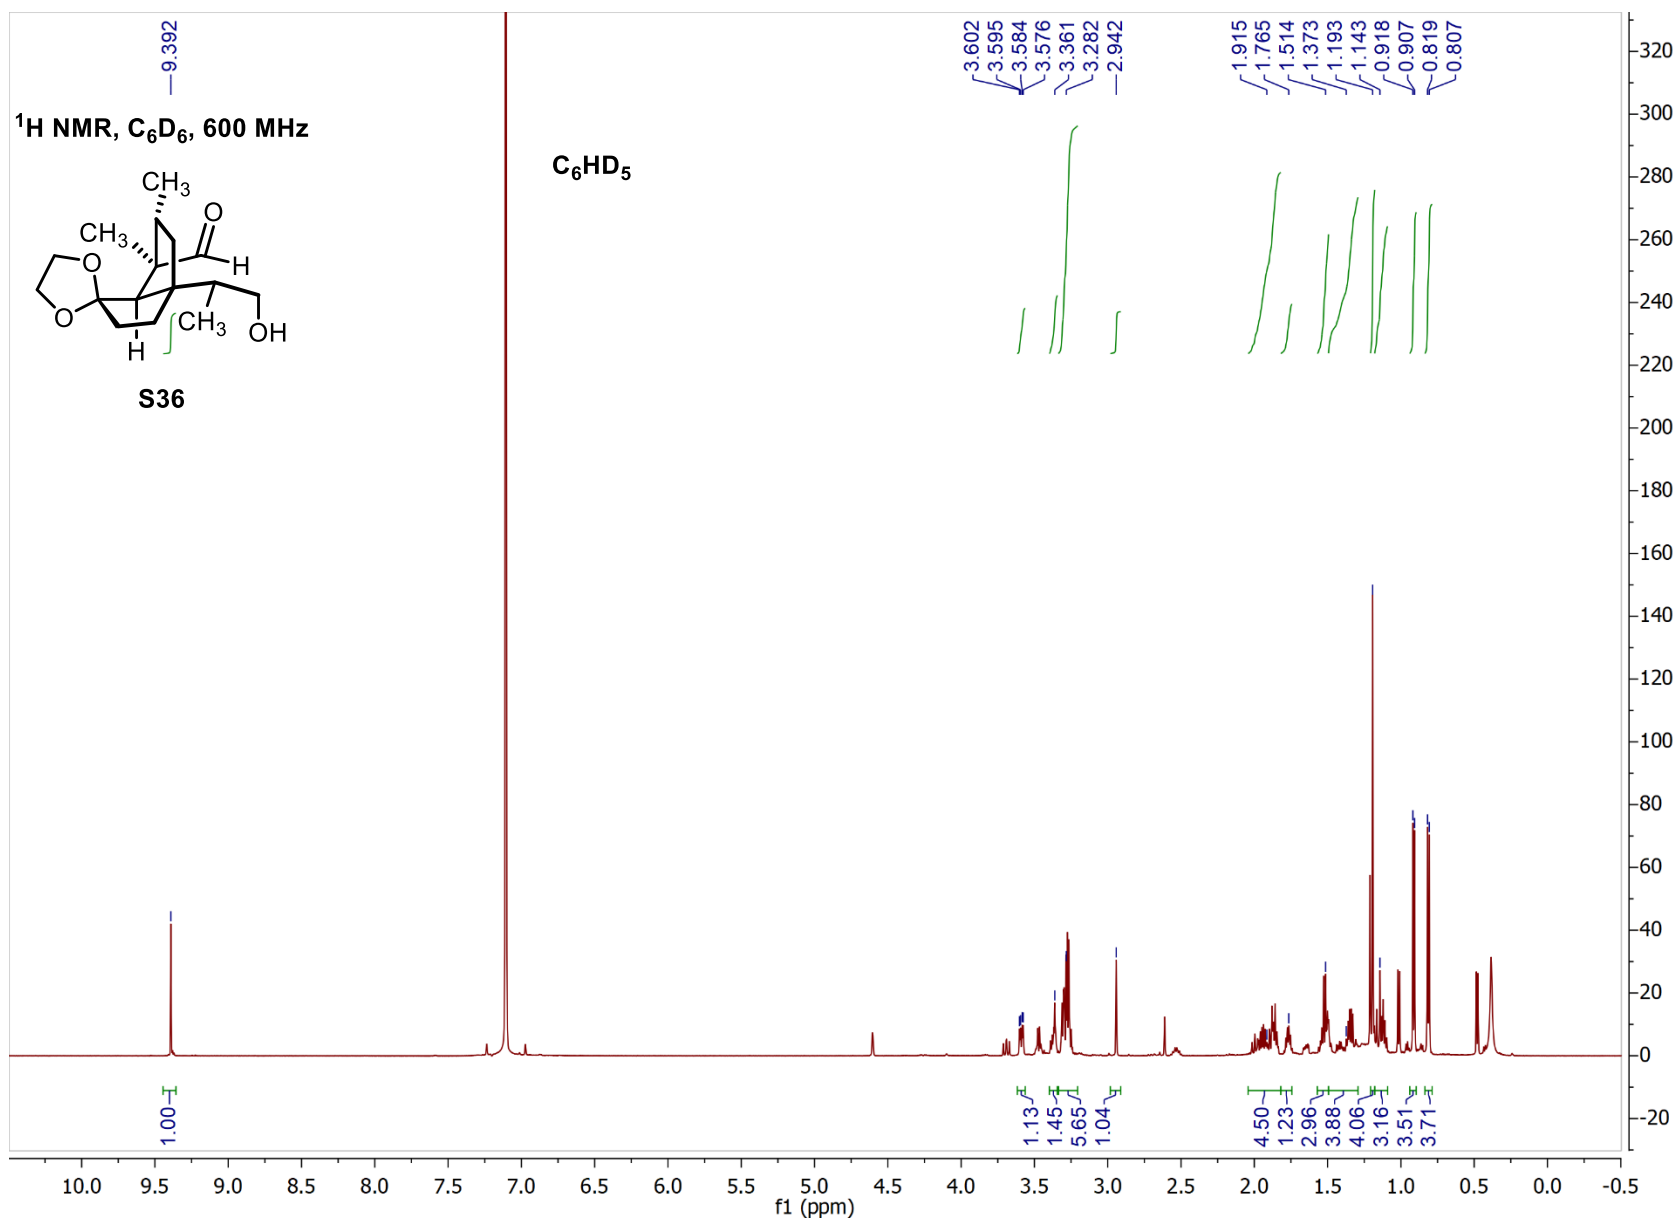



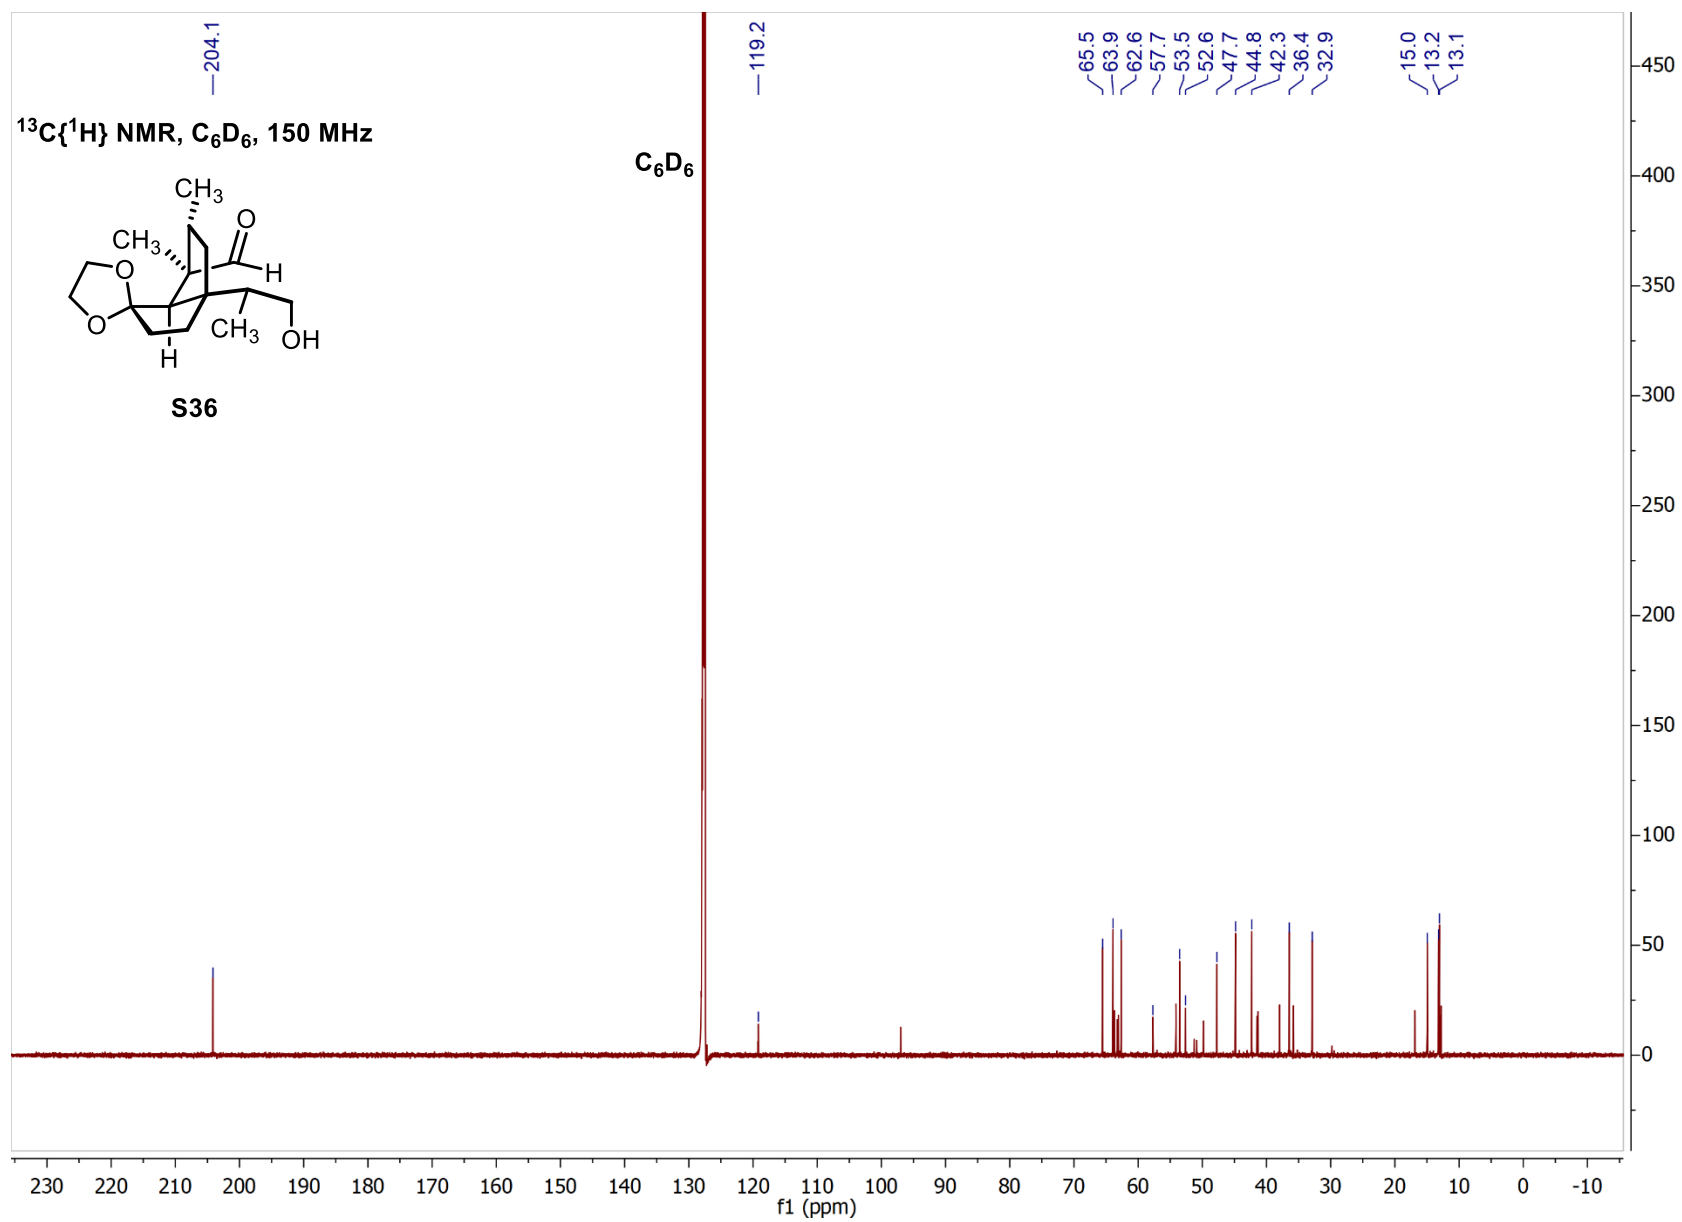

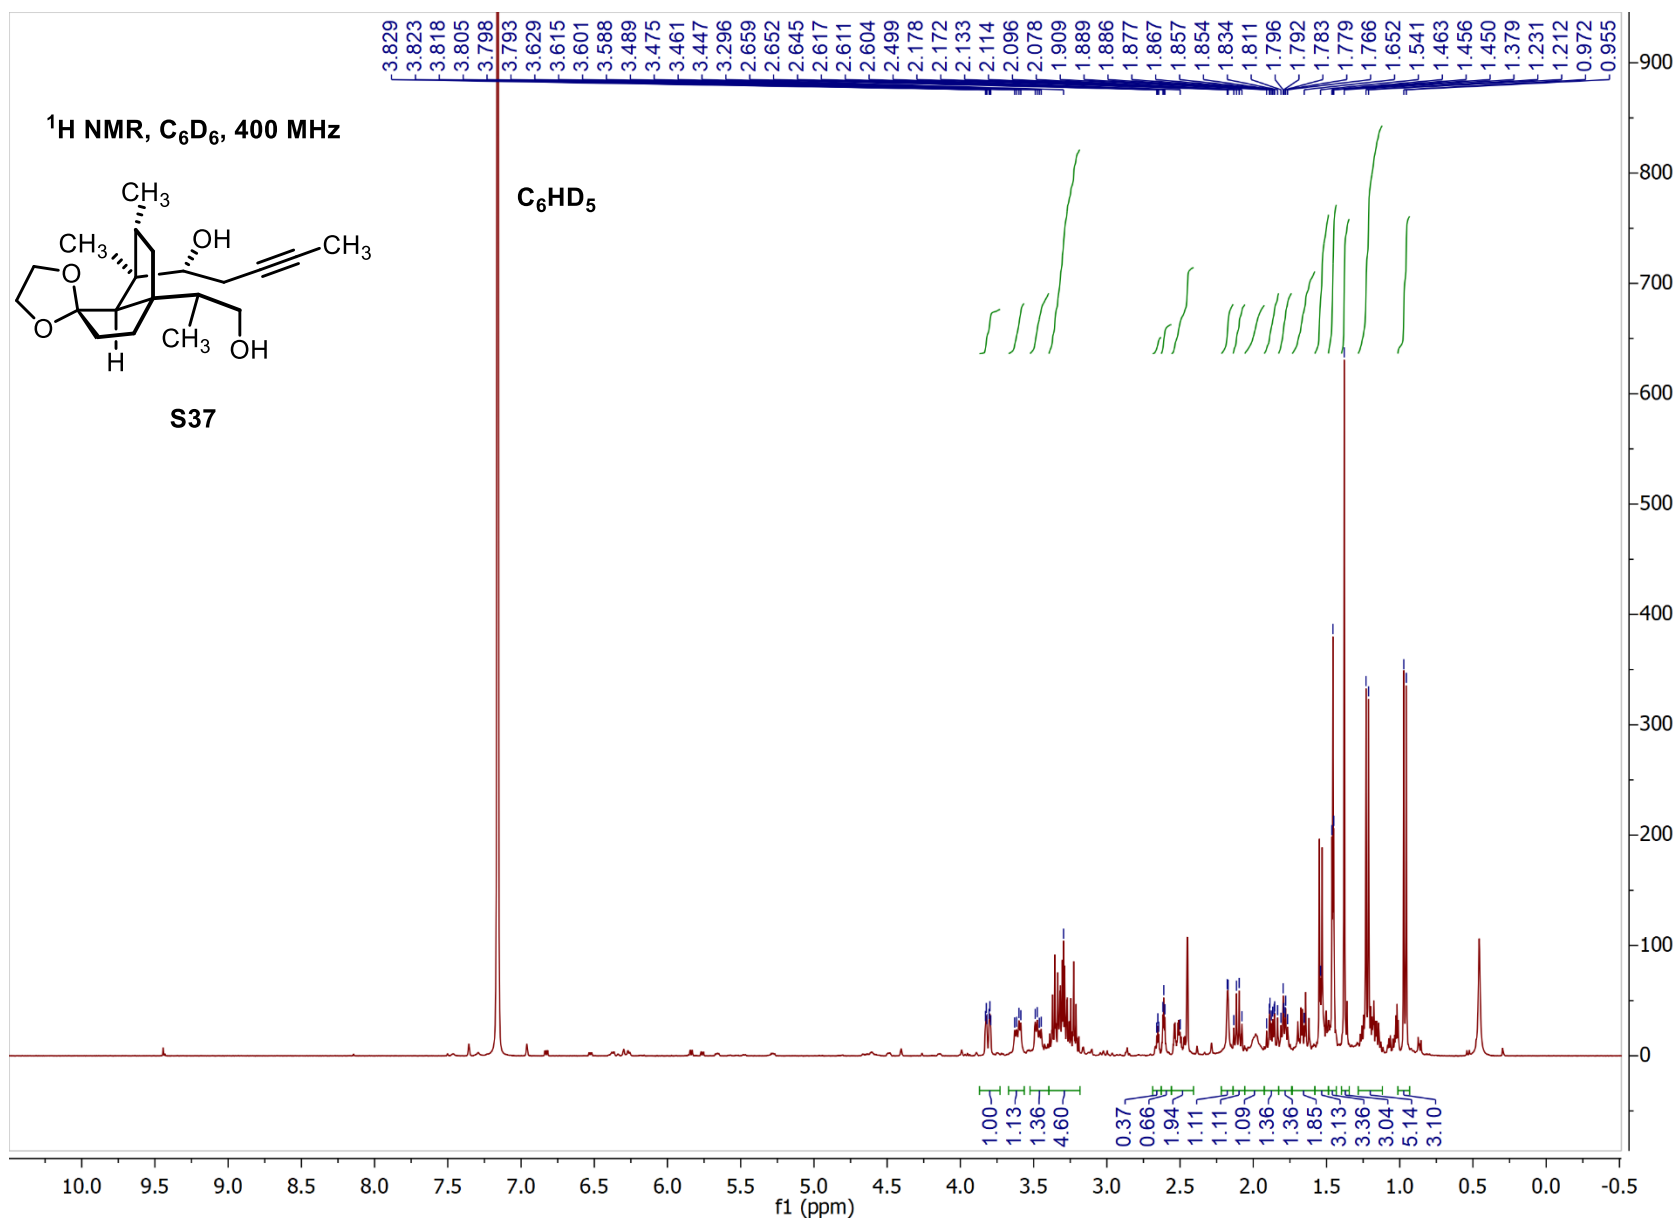

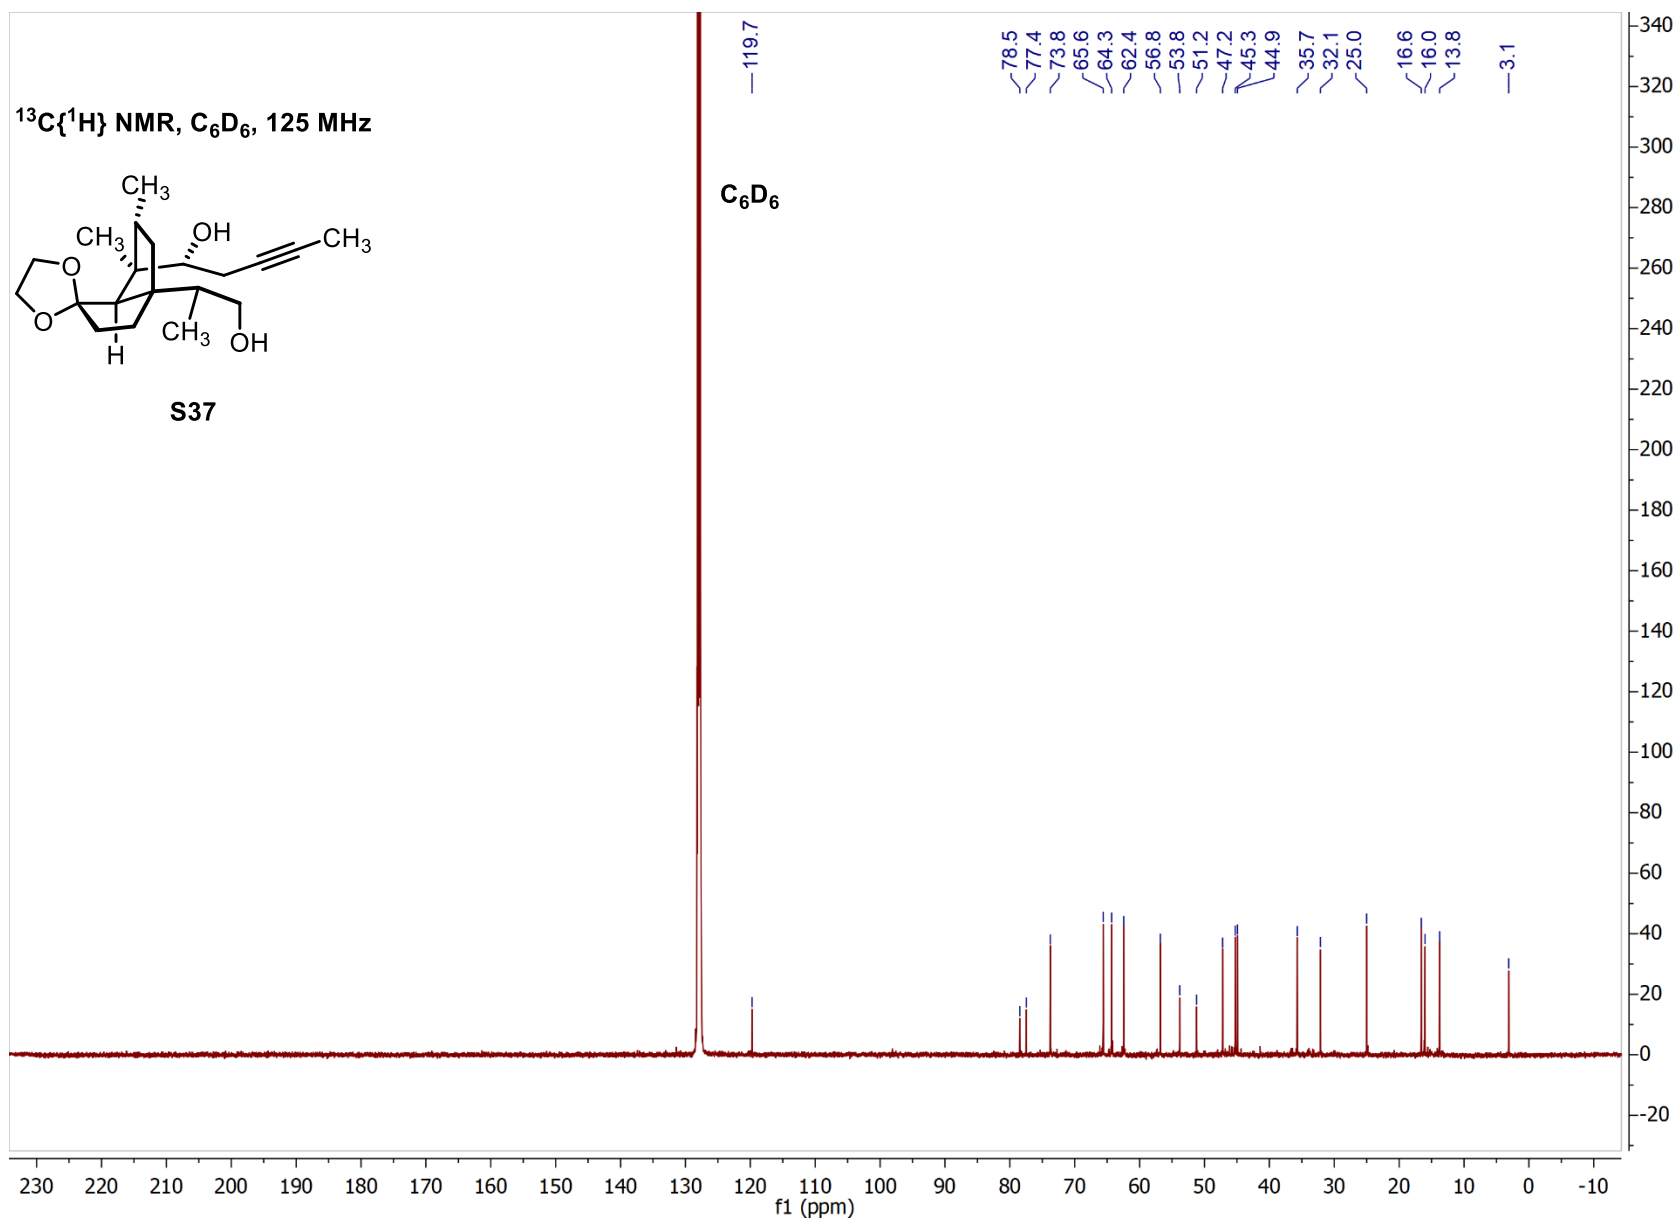

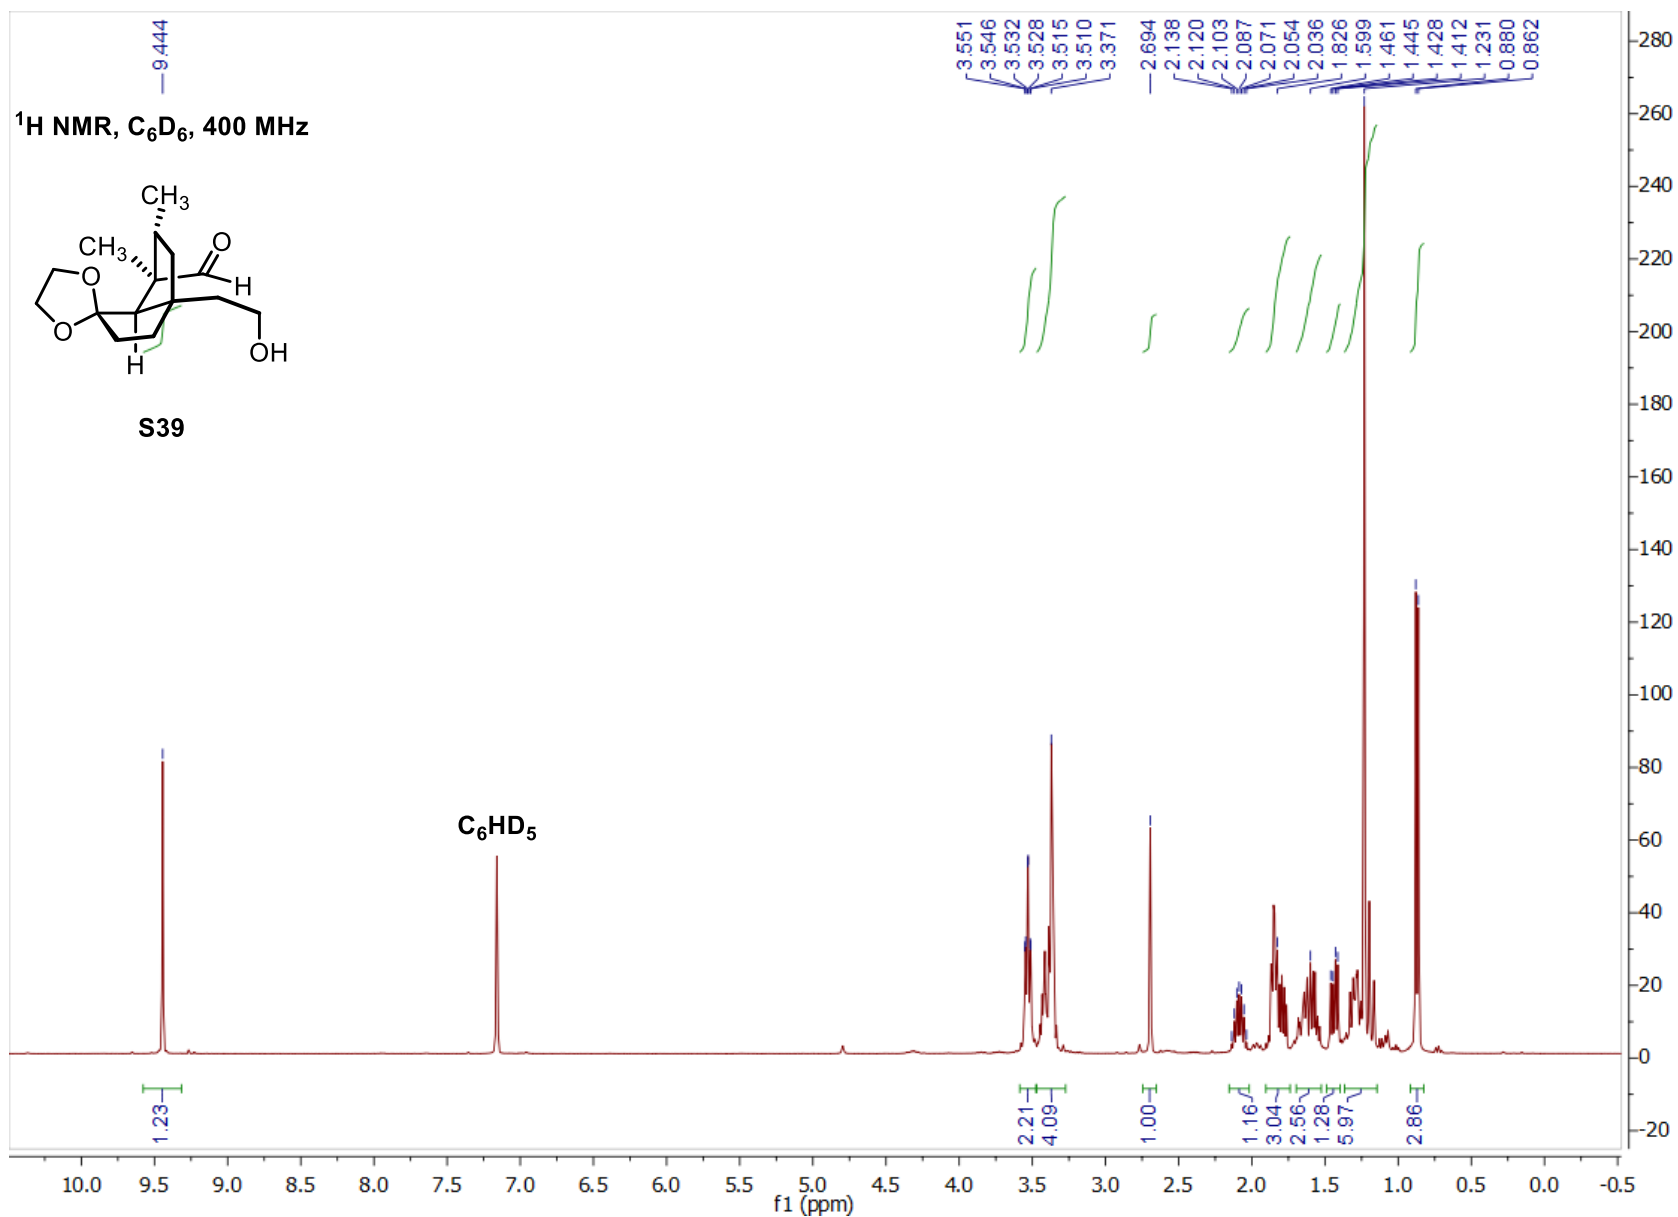

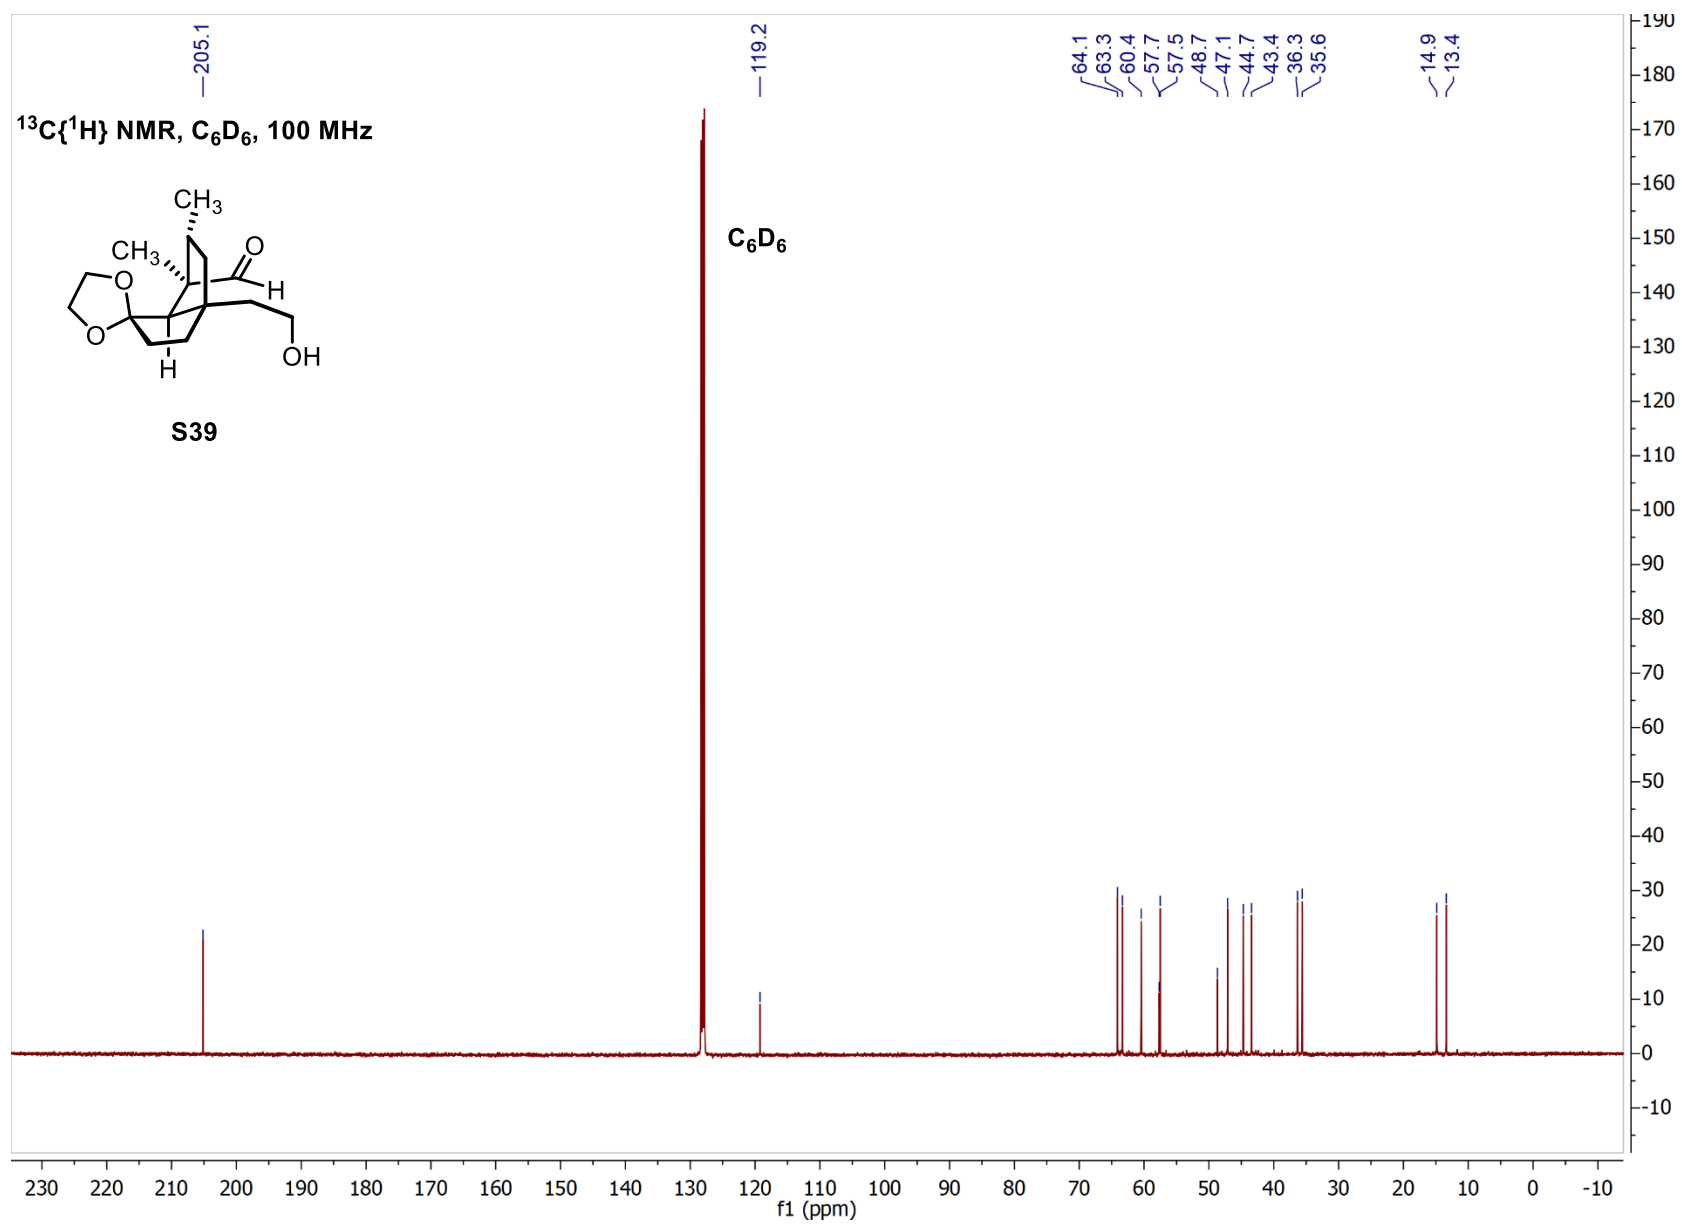

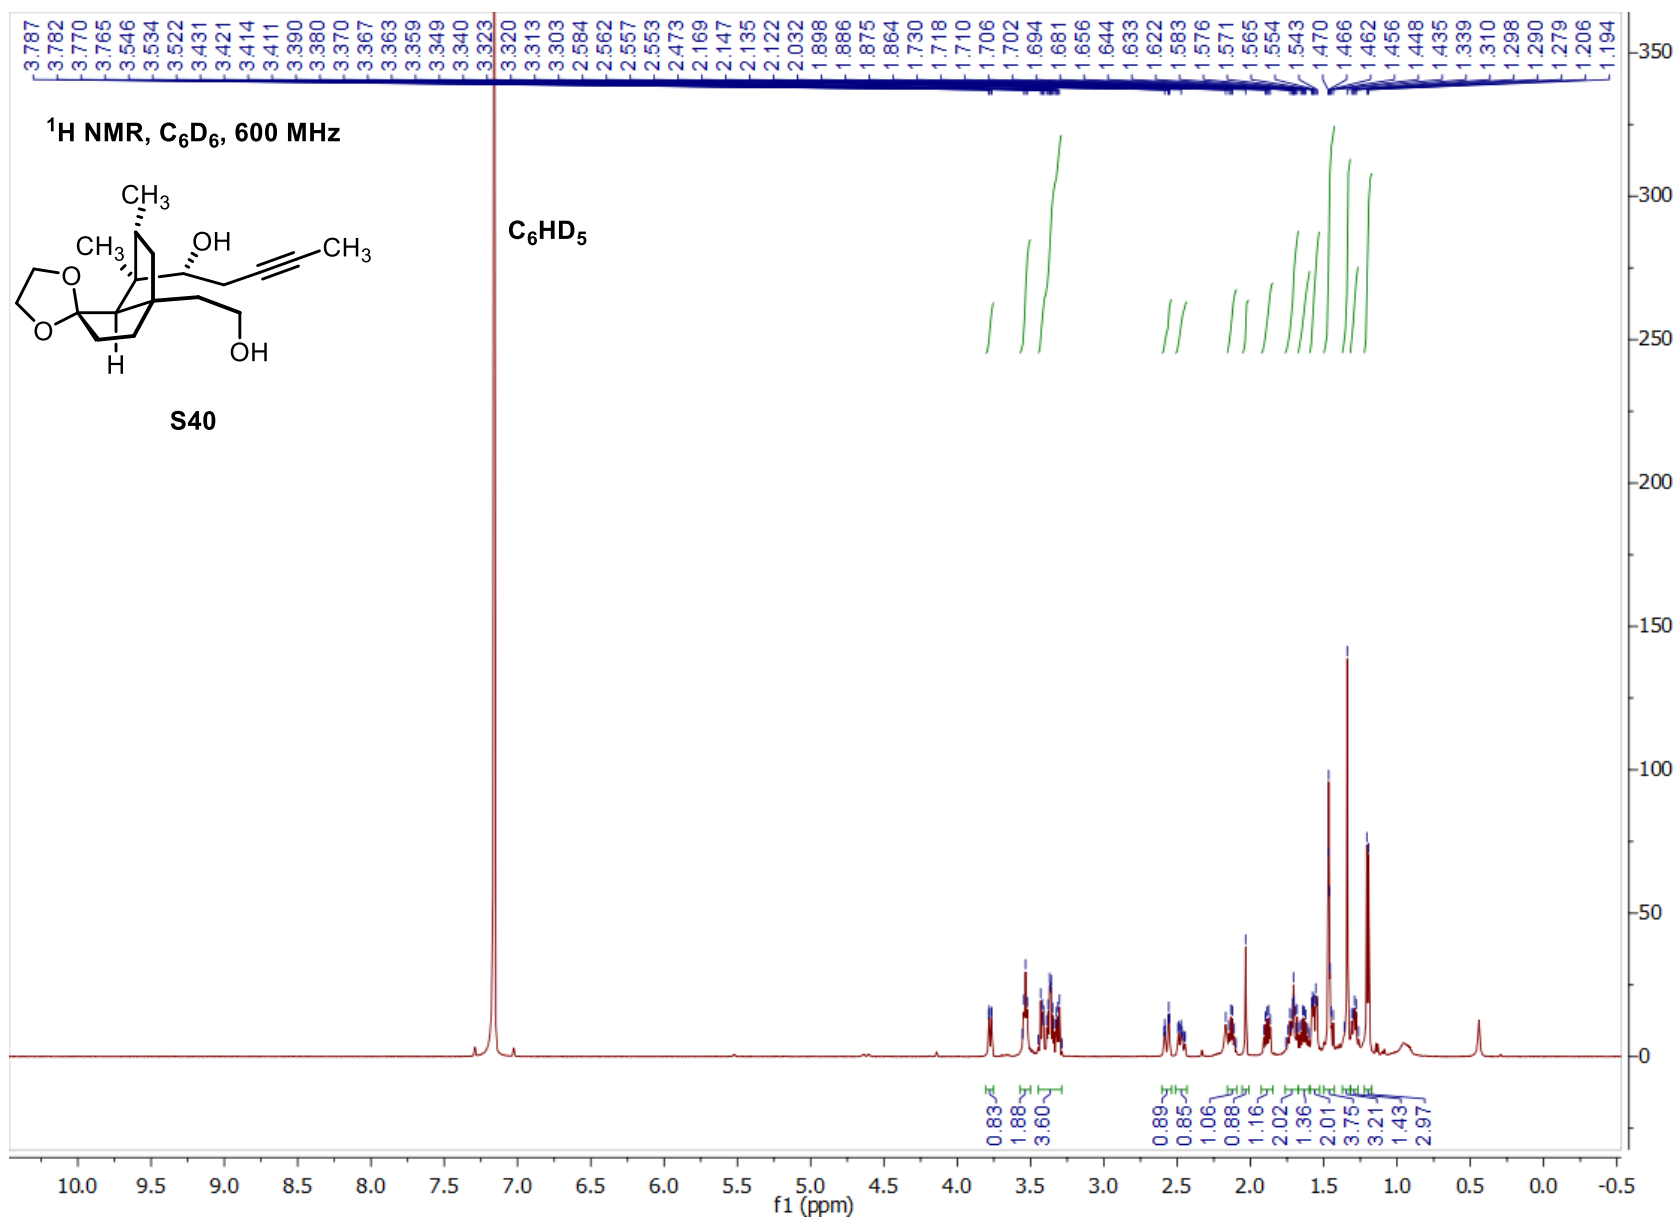

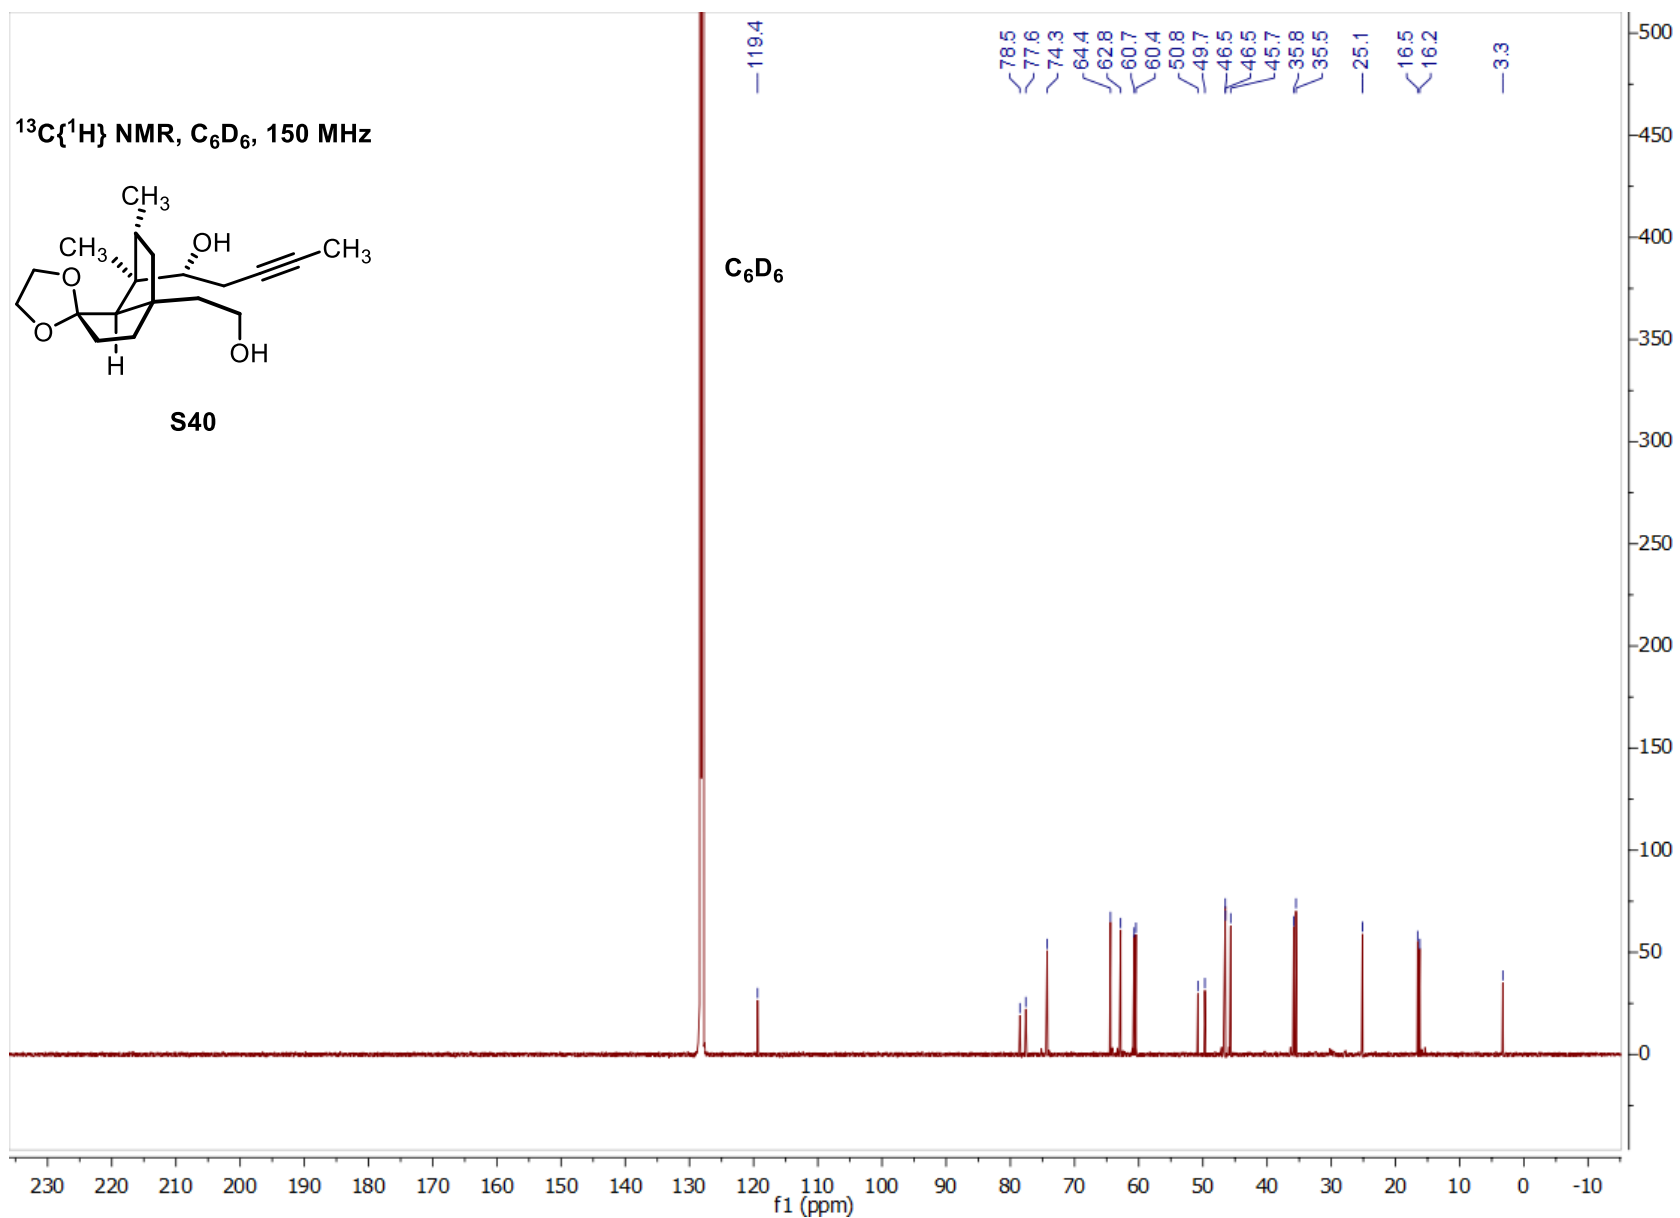

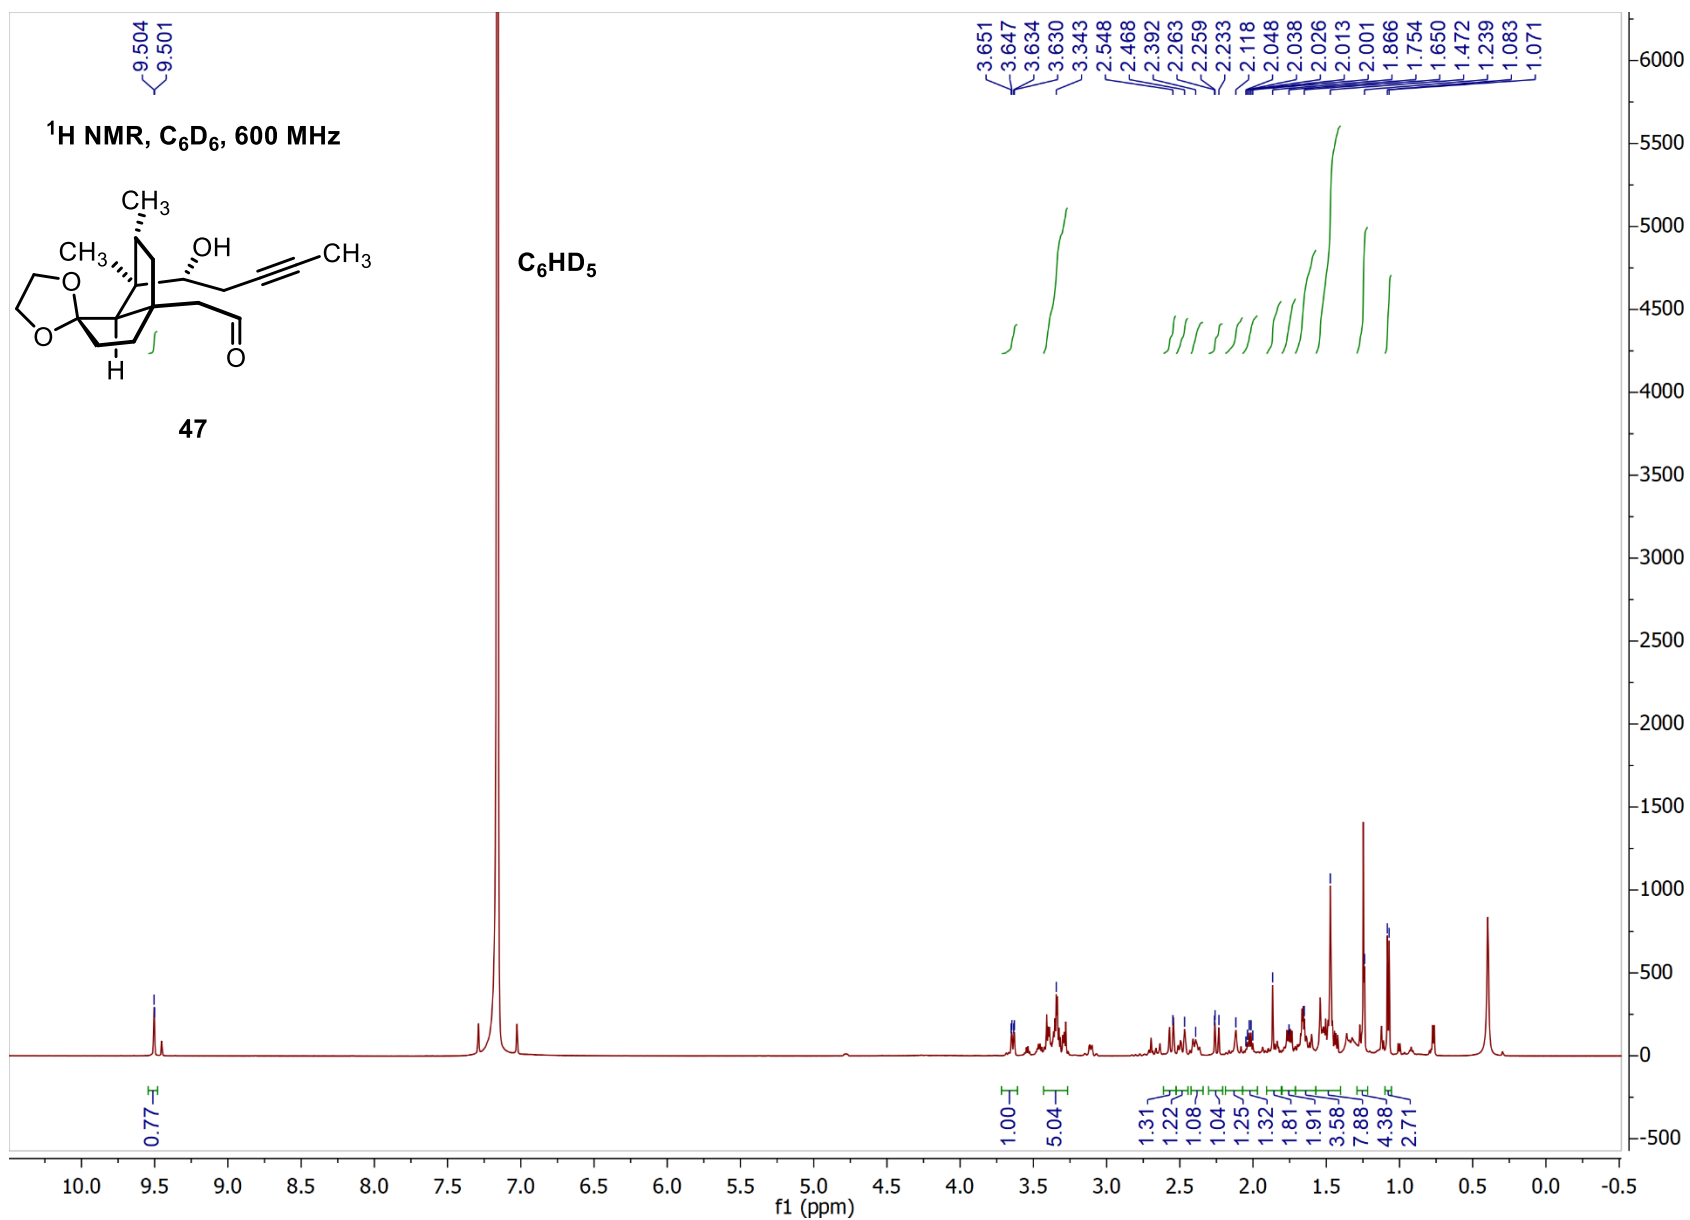



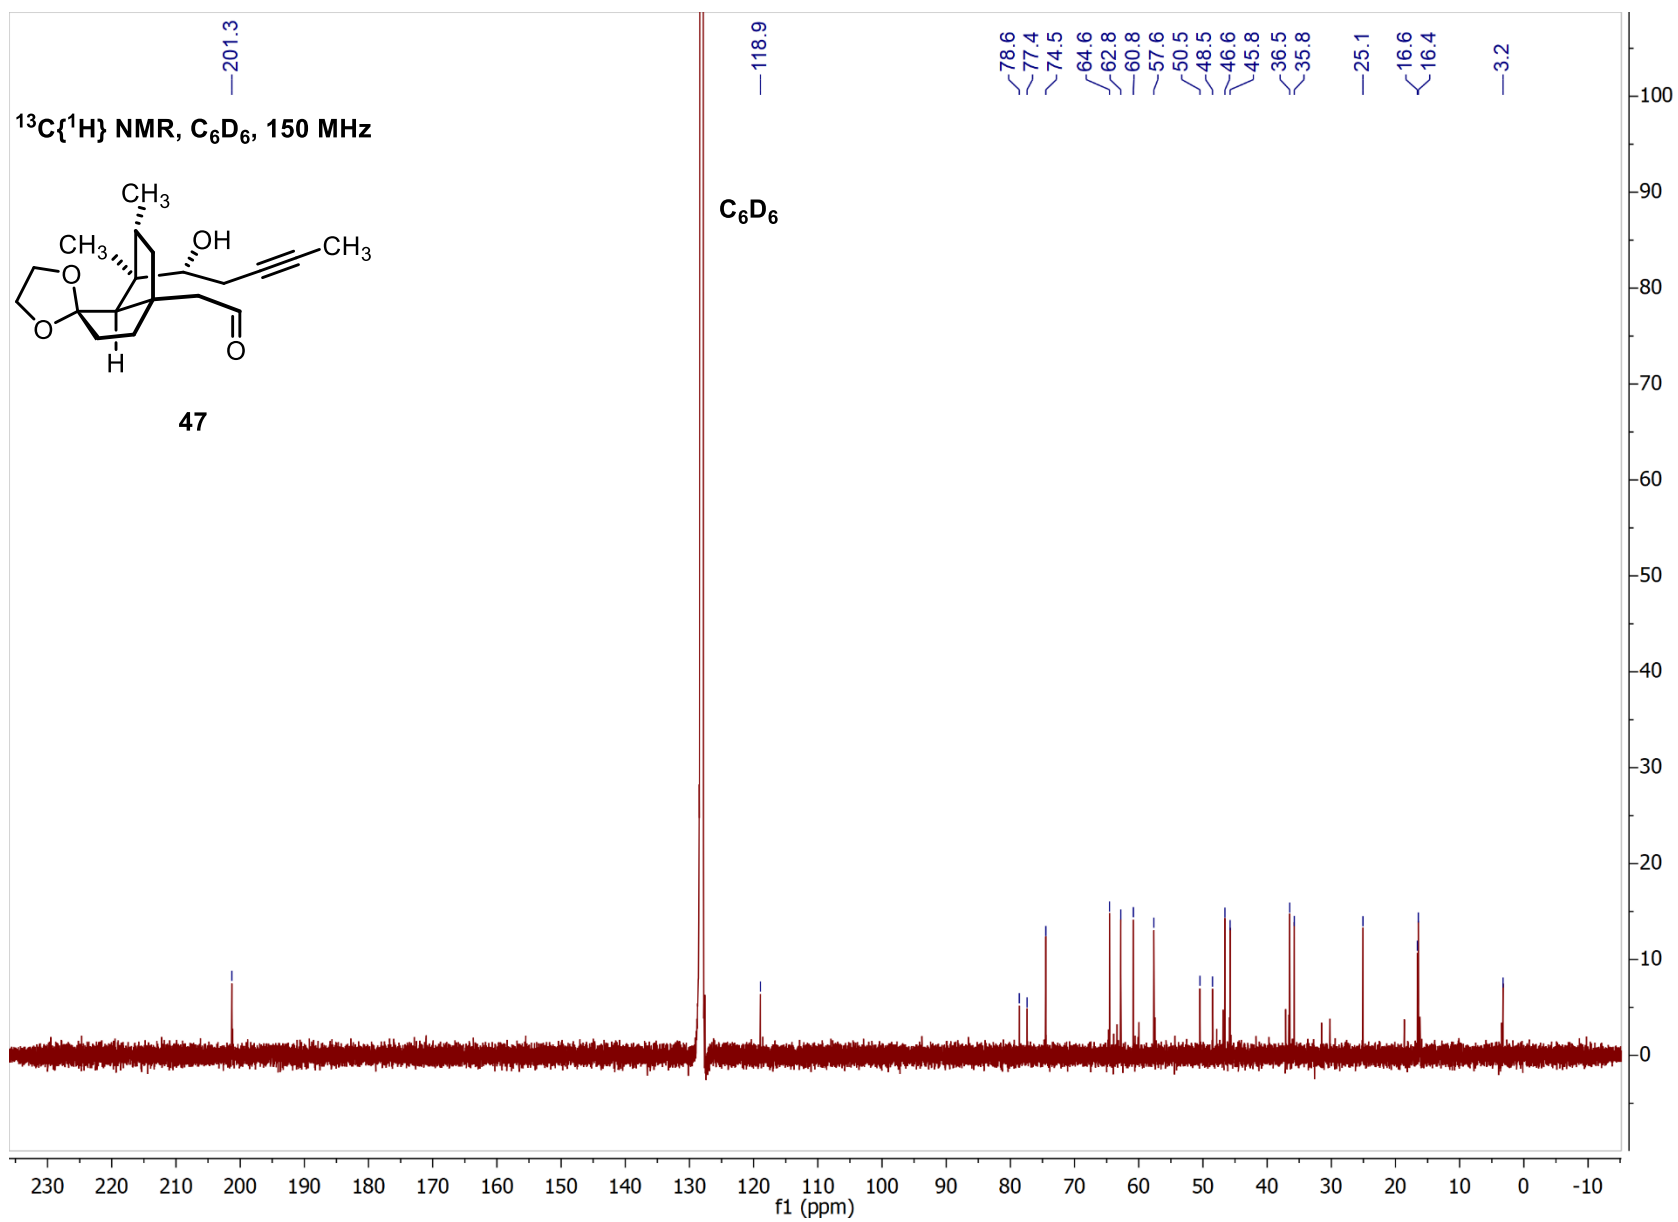

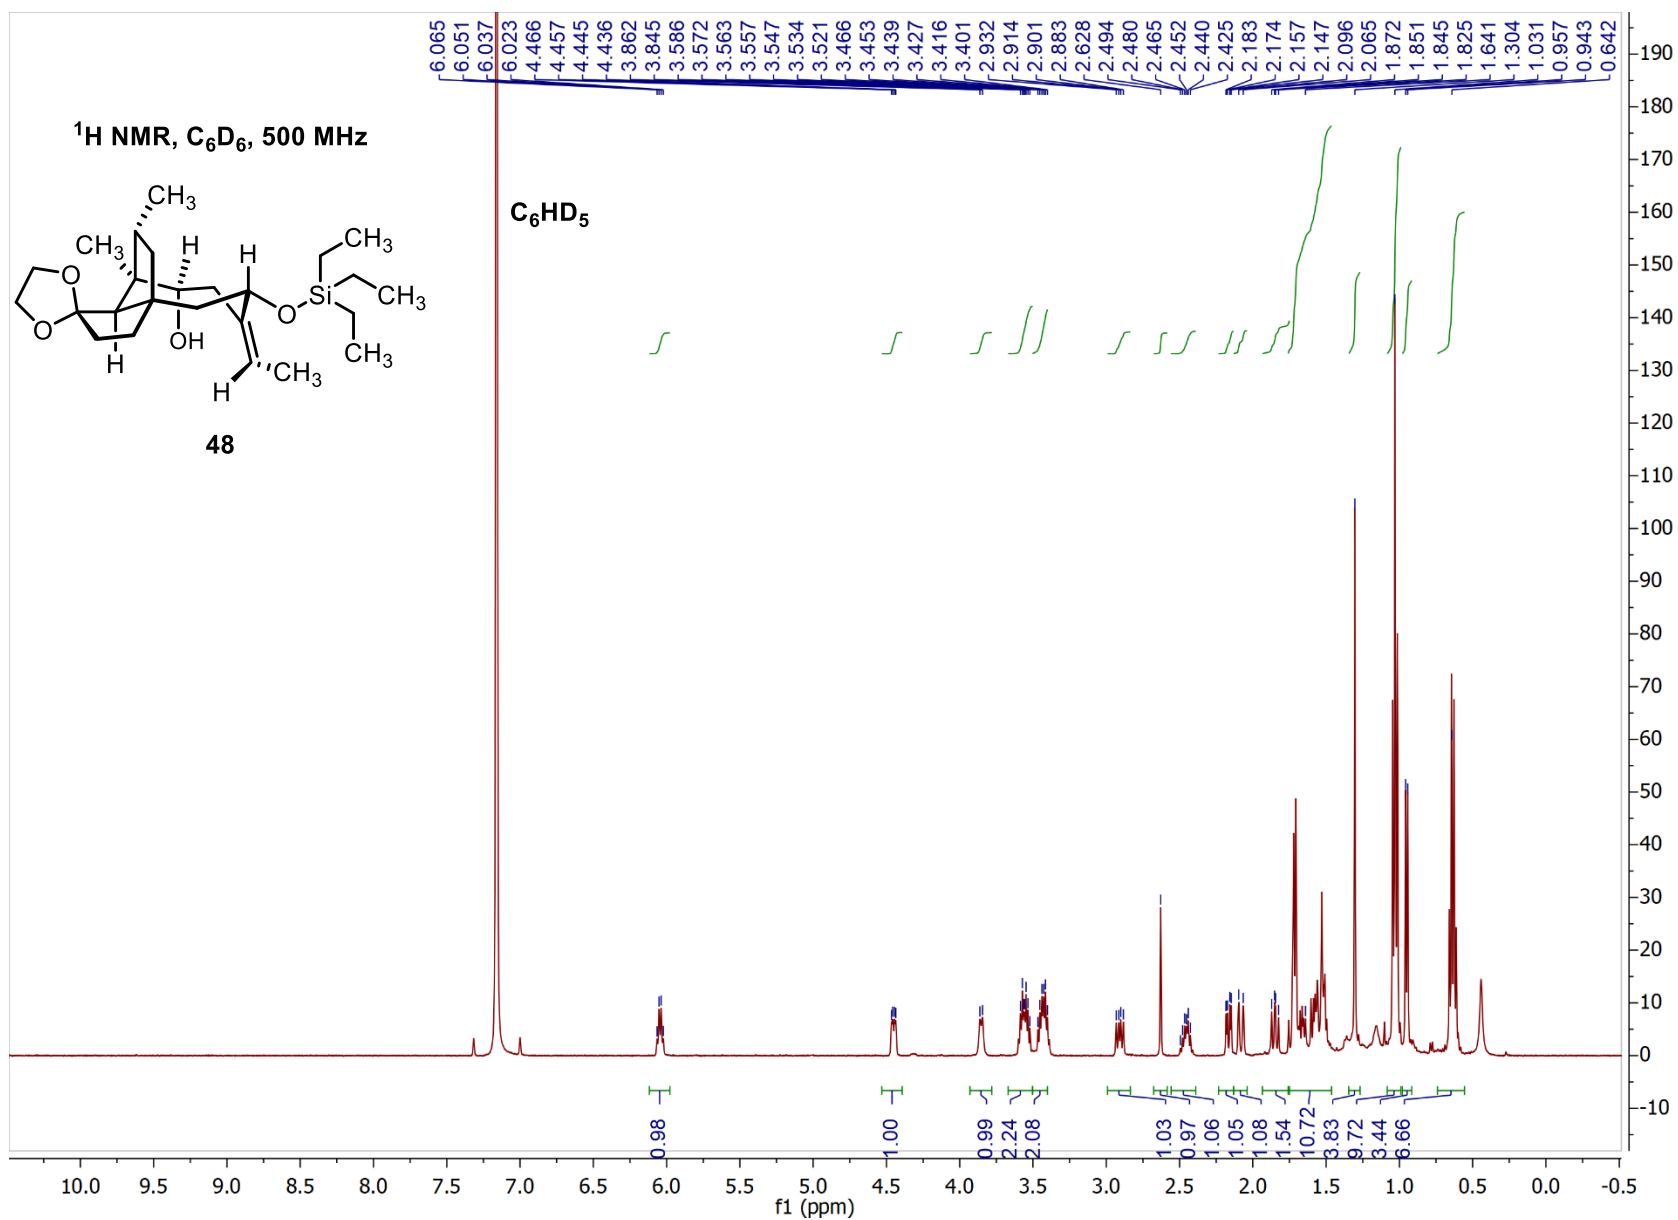

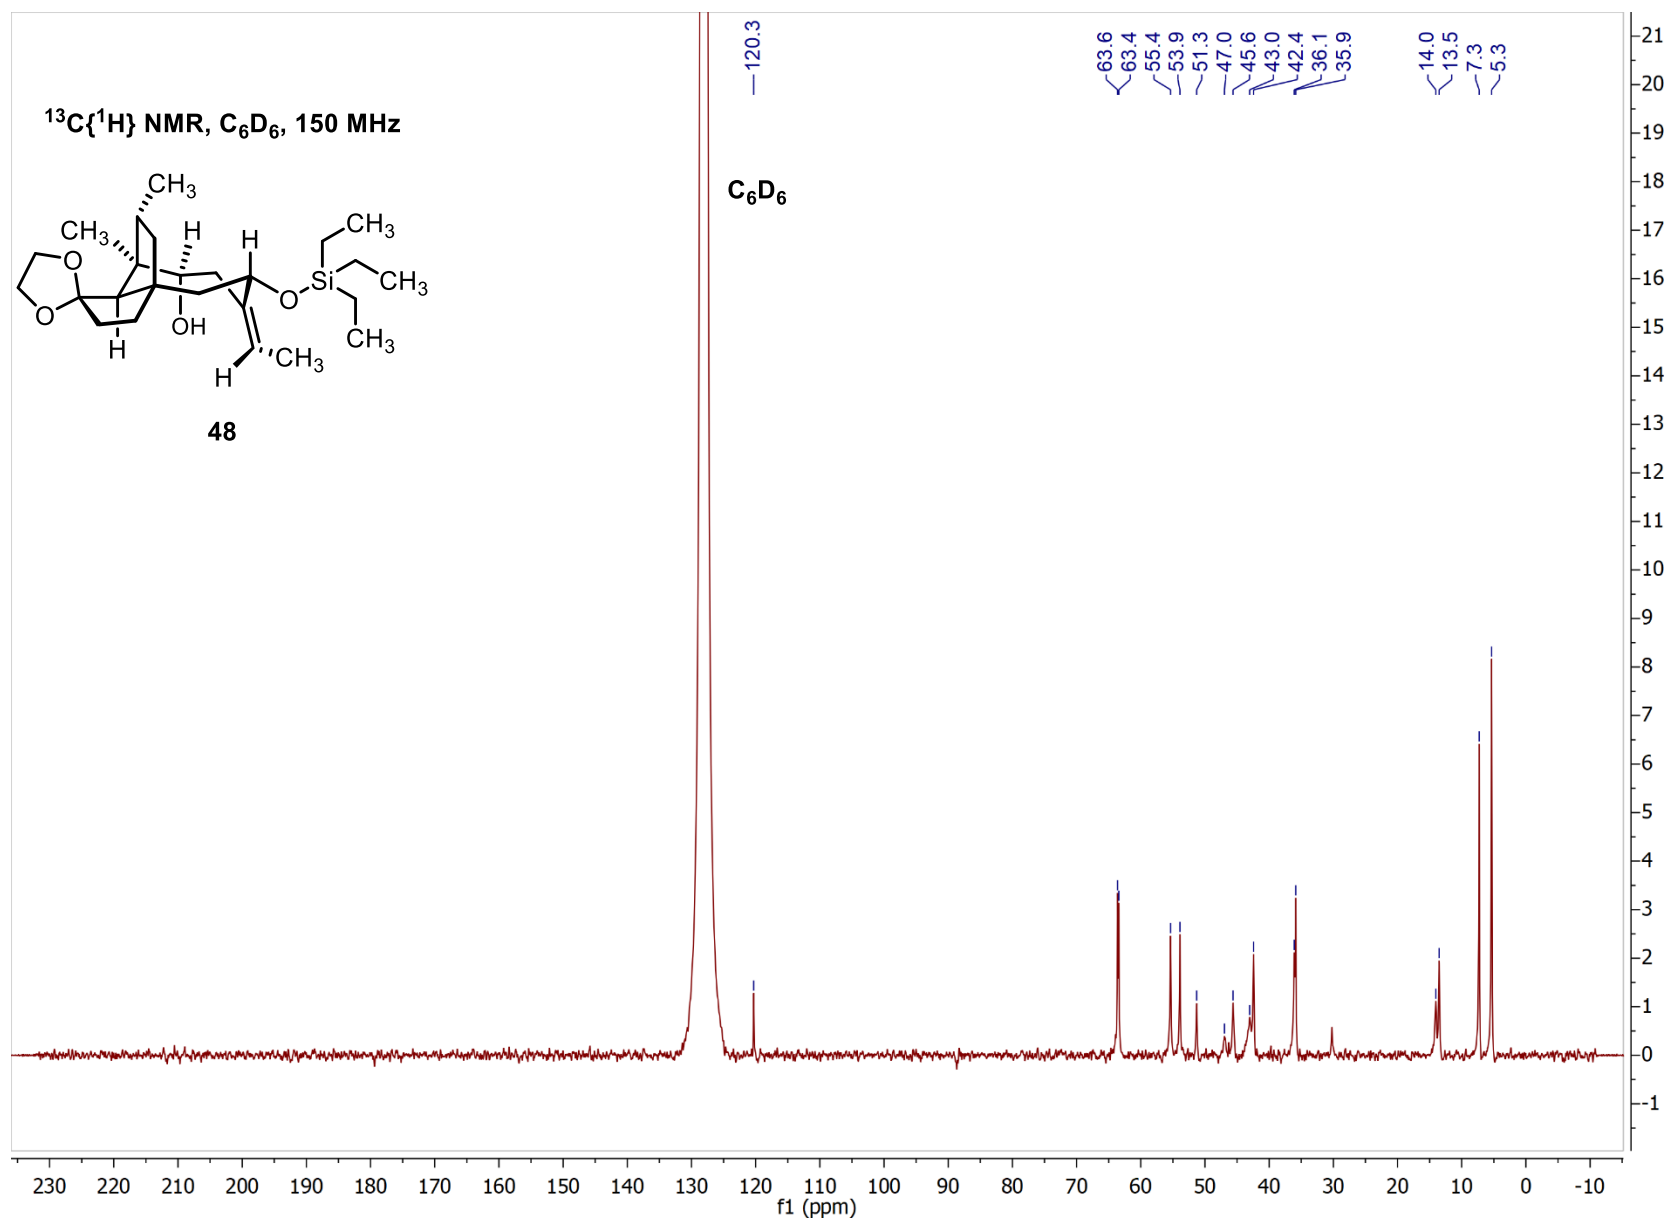

48, NOESY, C<sub>6</sub>D<sub>6</sub>, 500 MHz

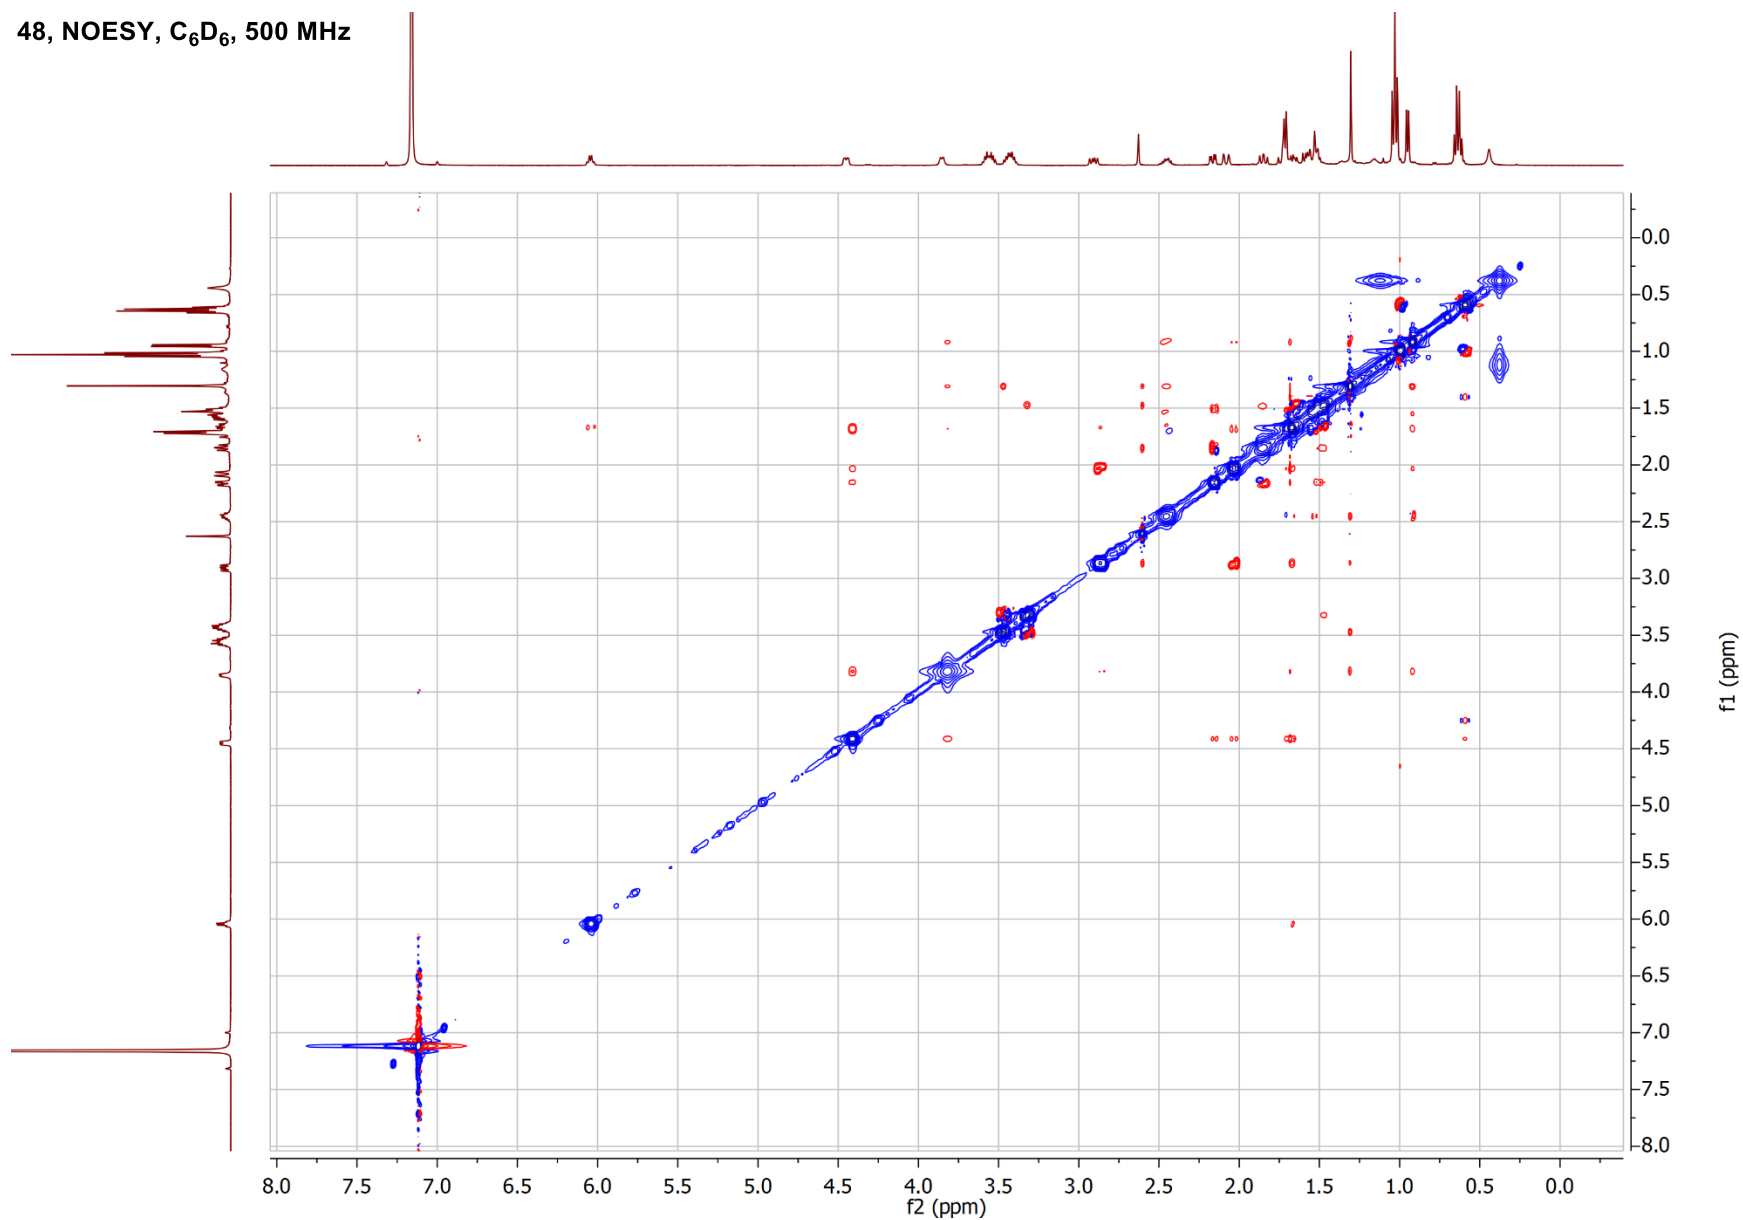

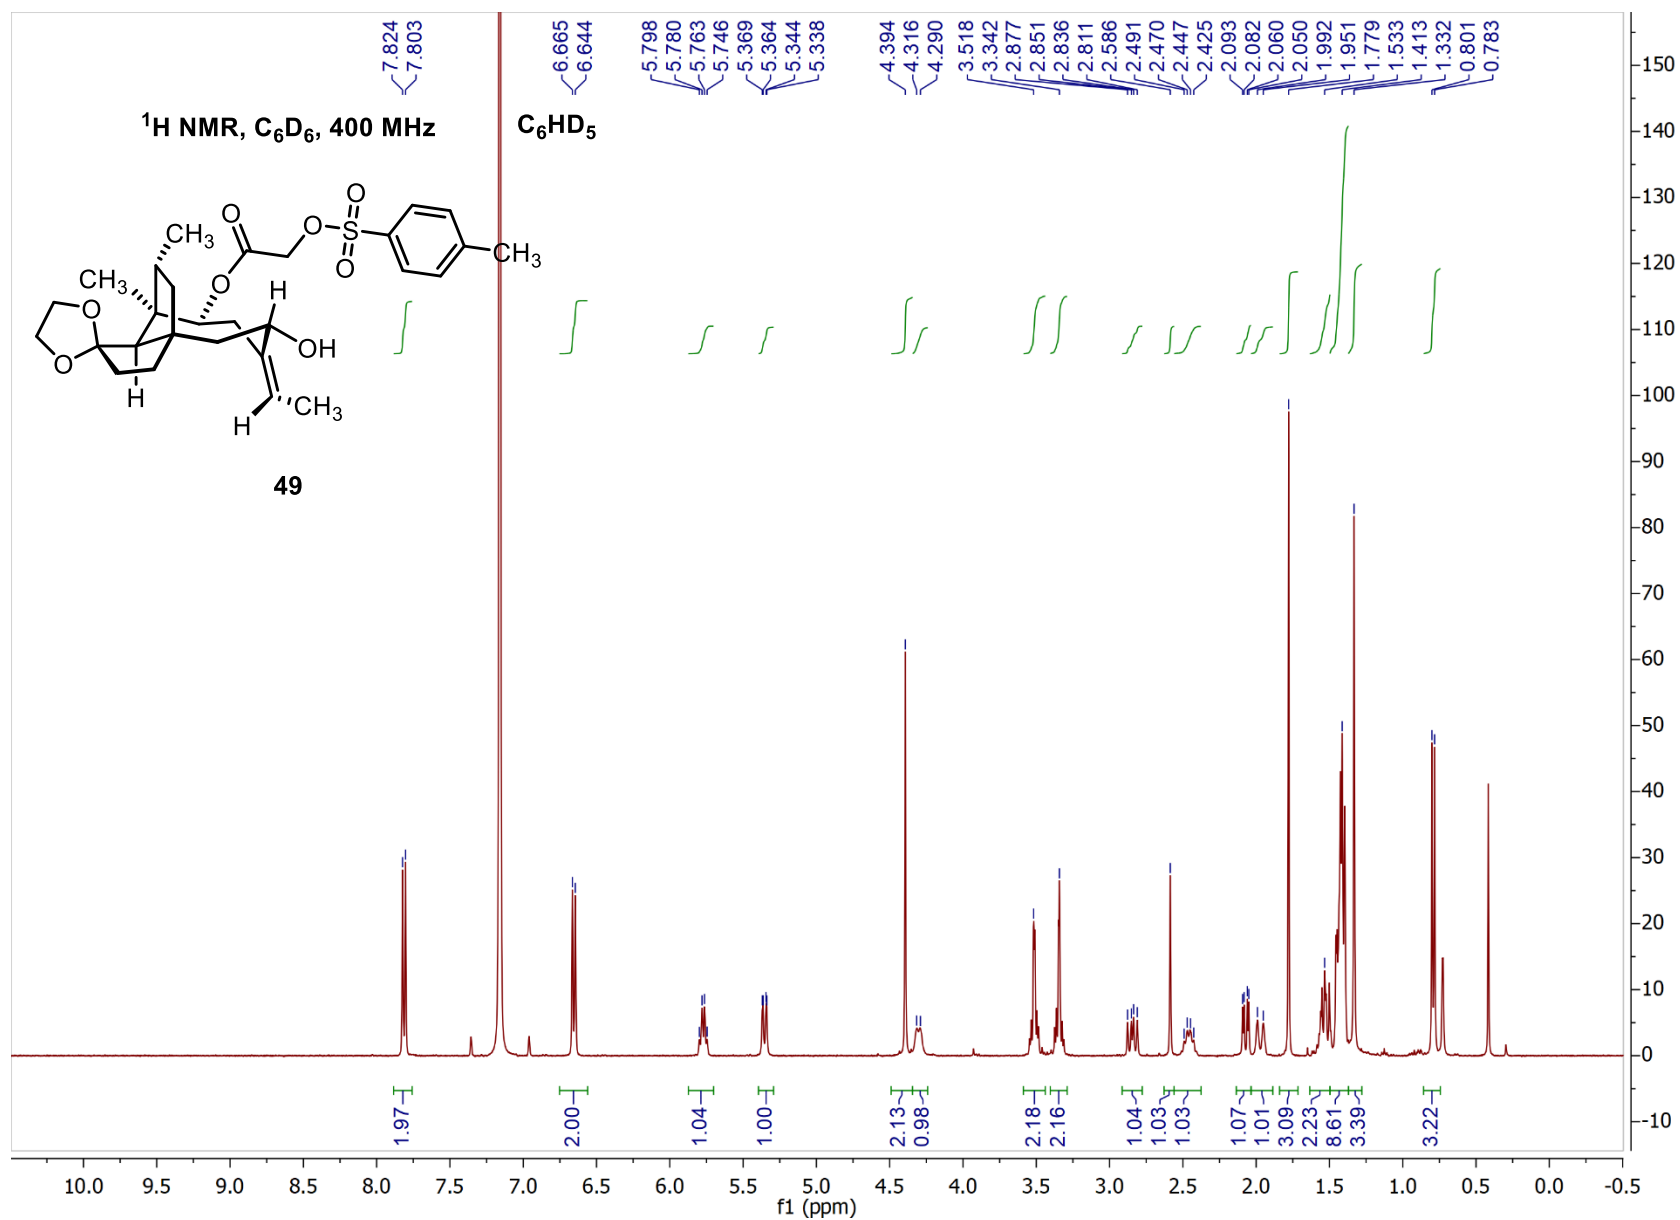

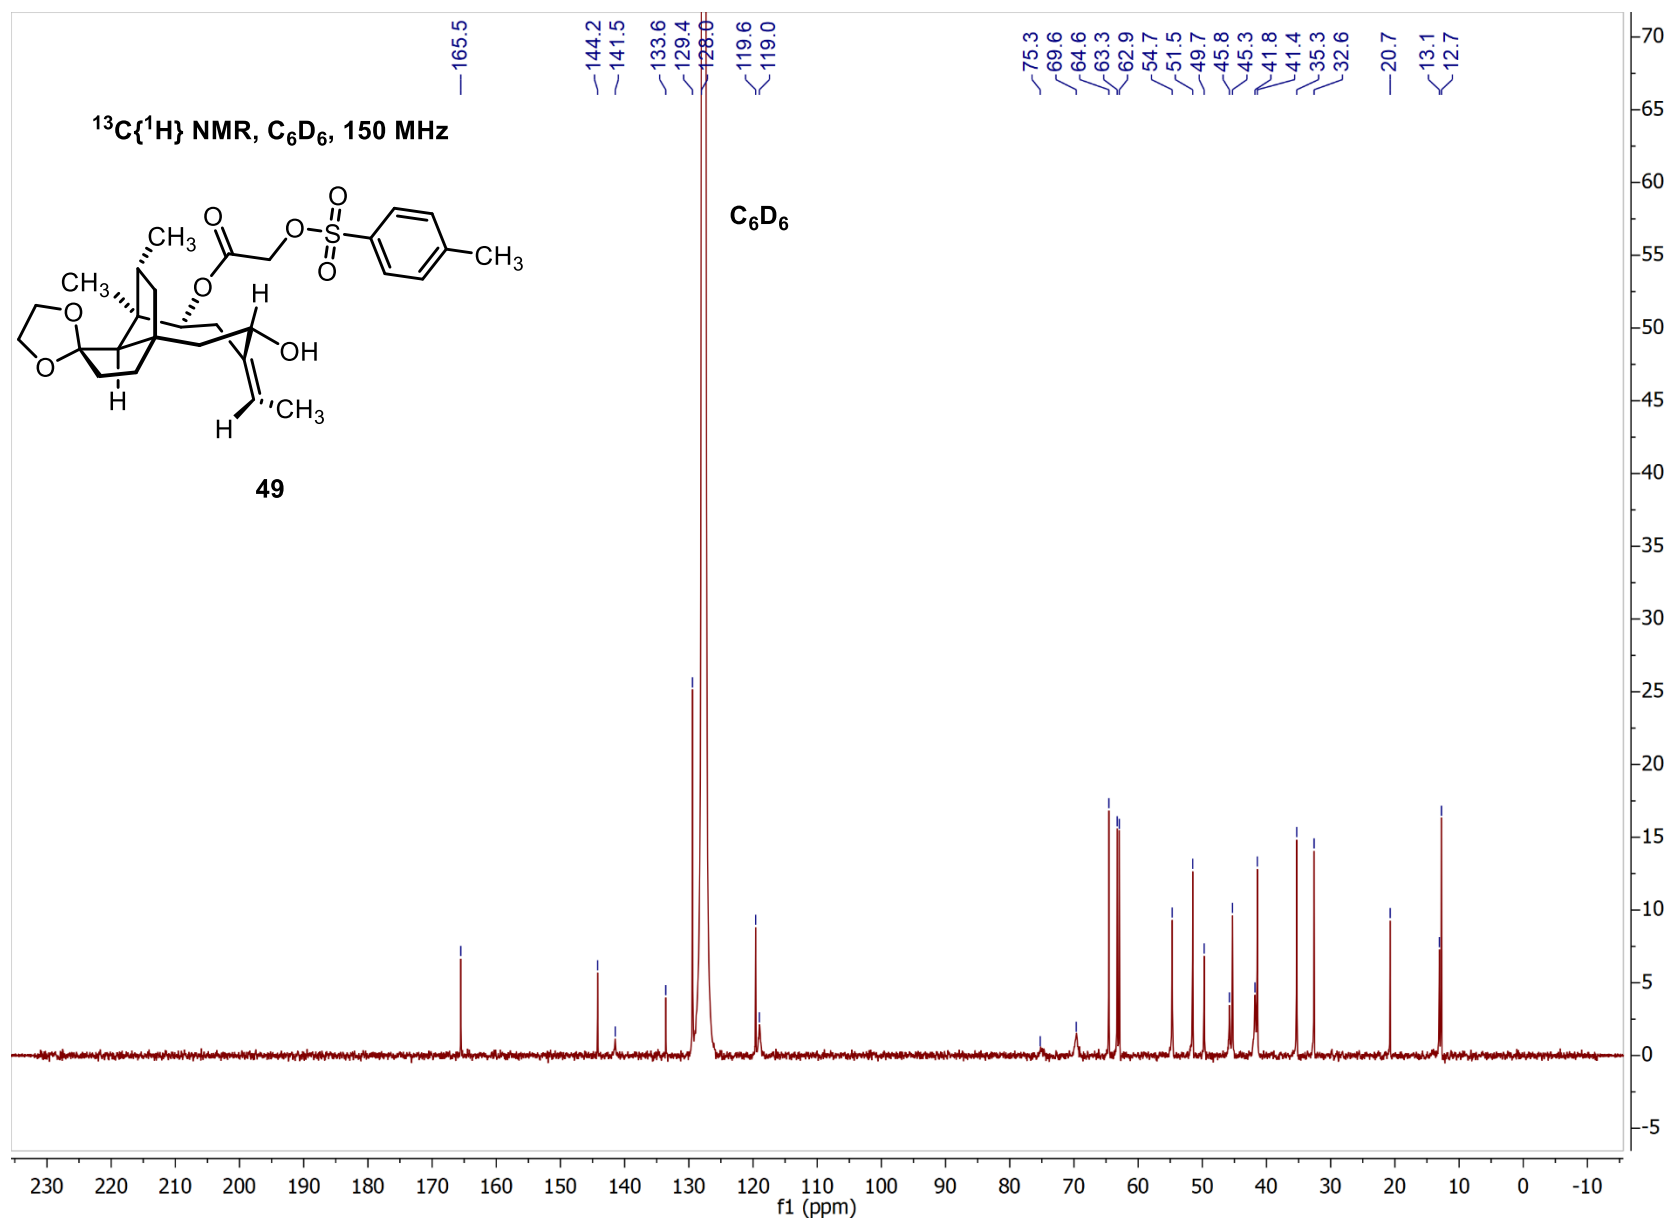

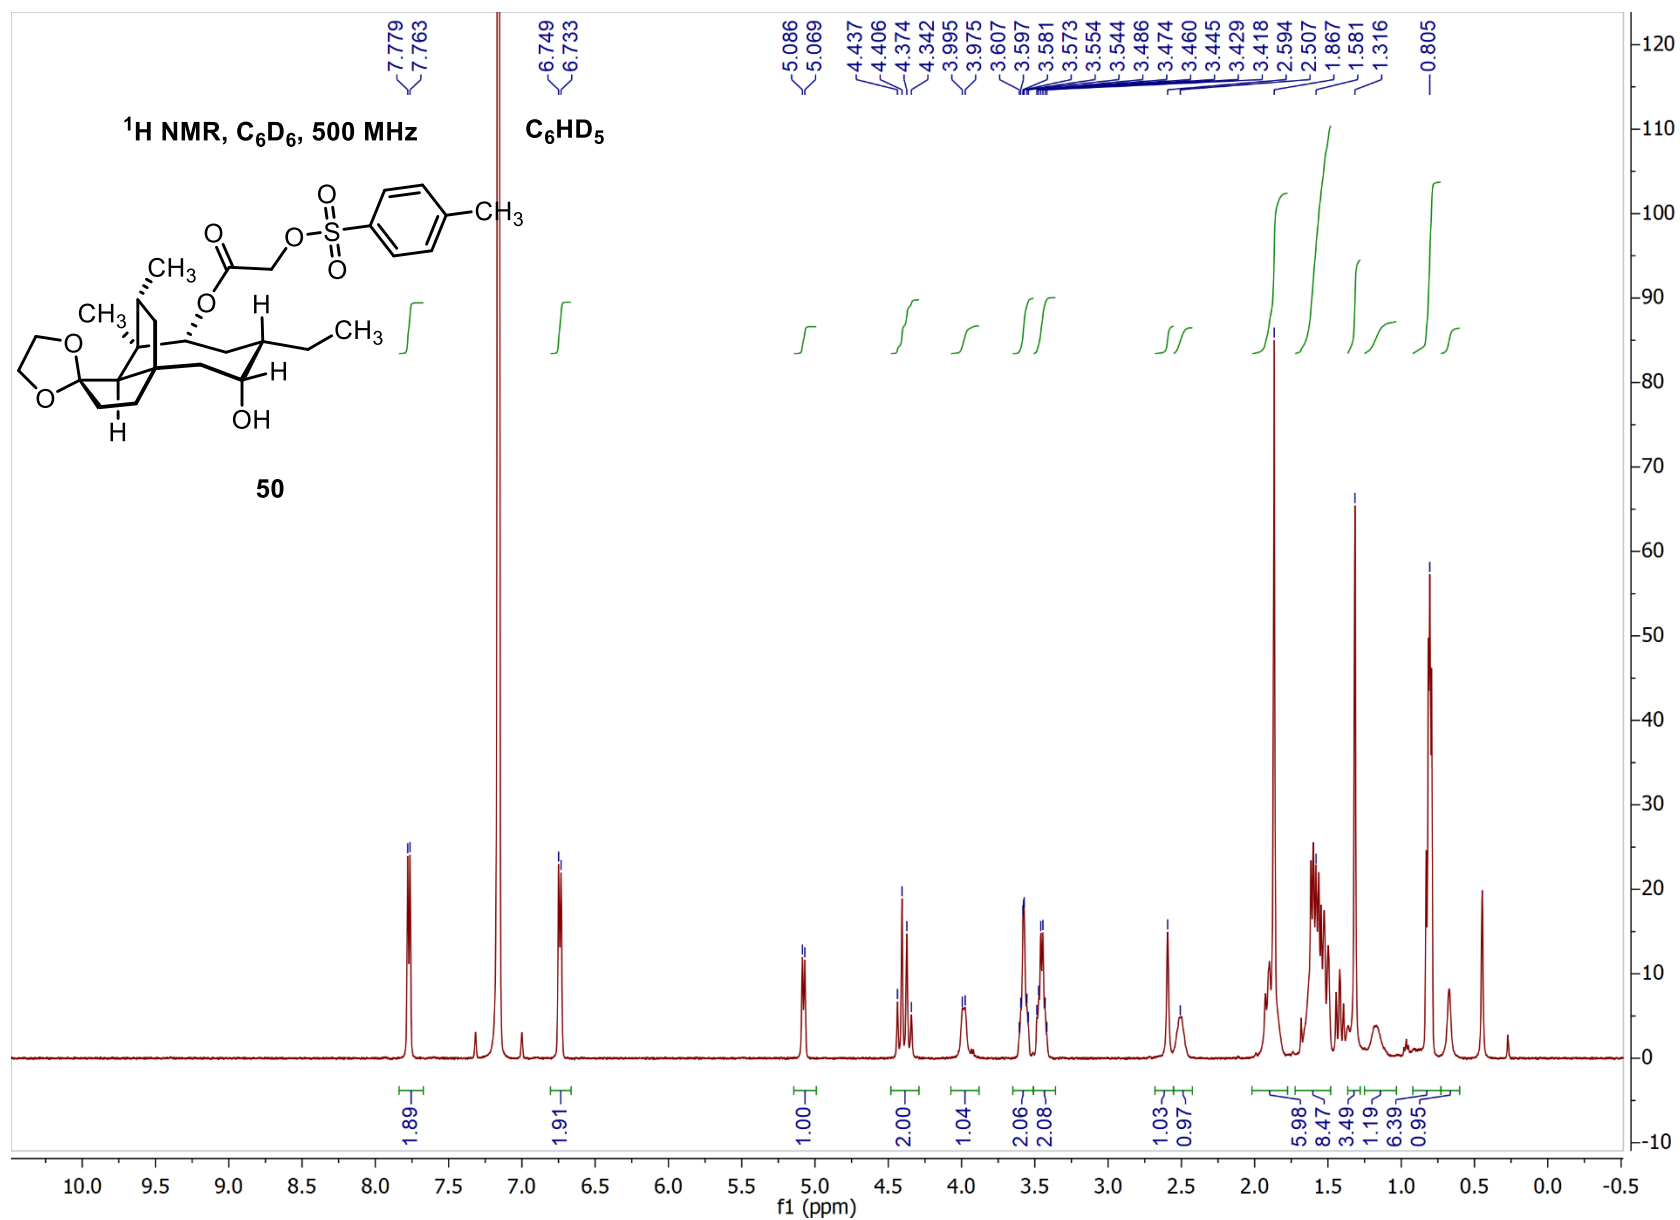

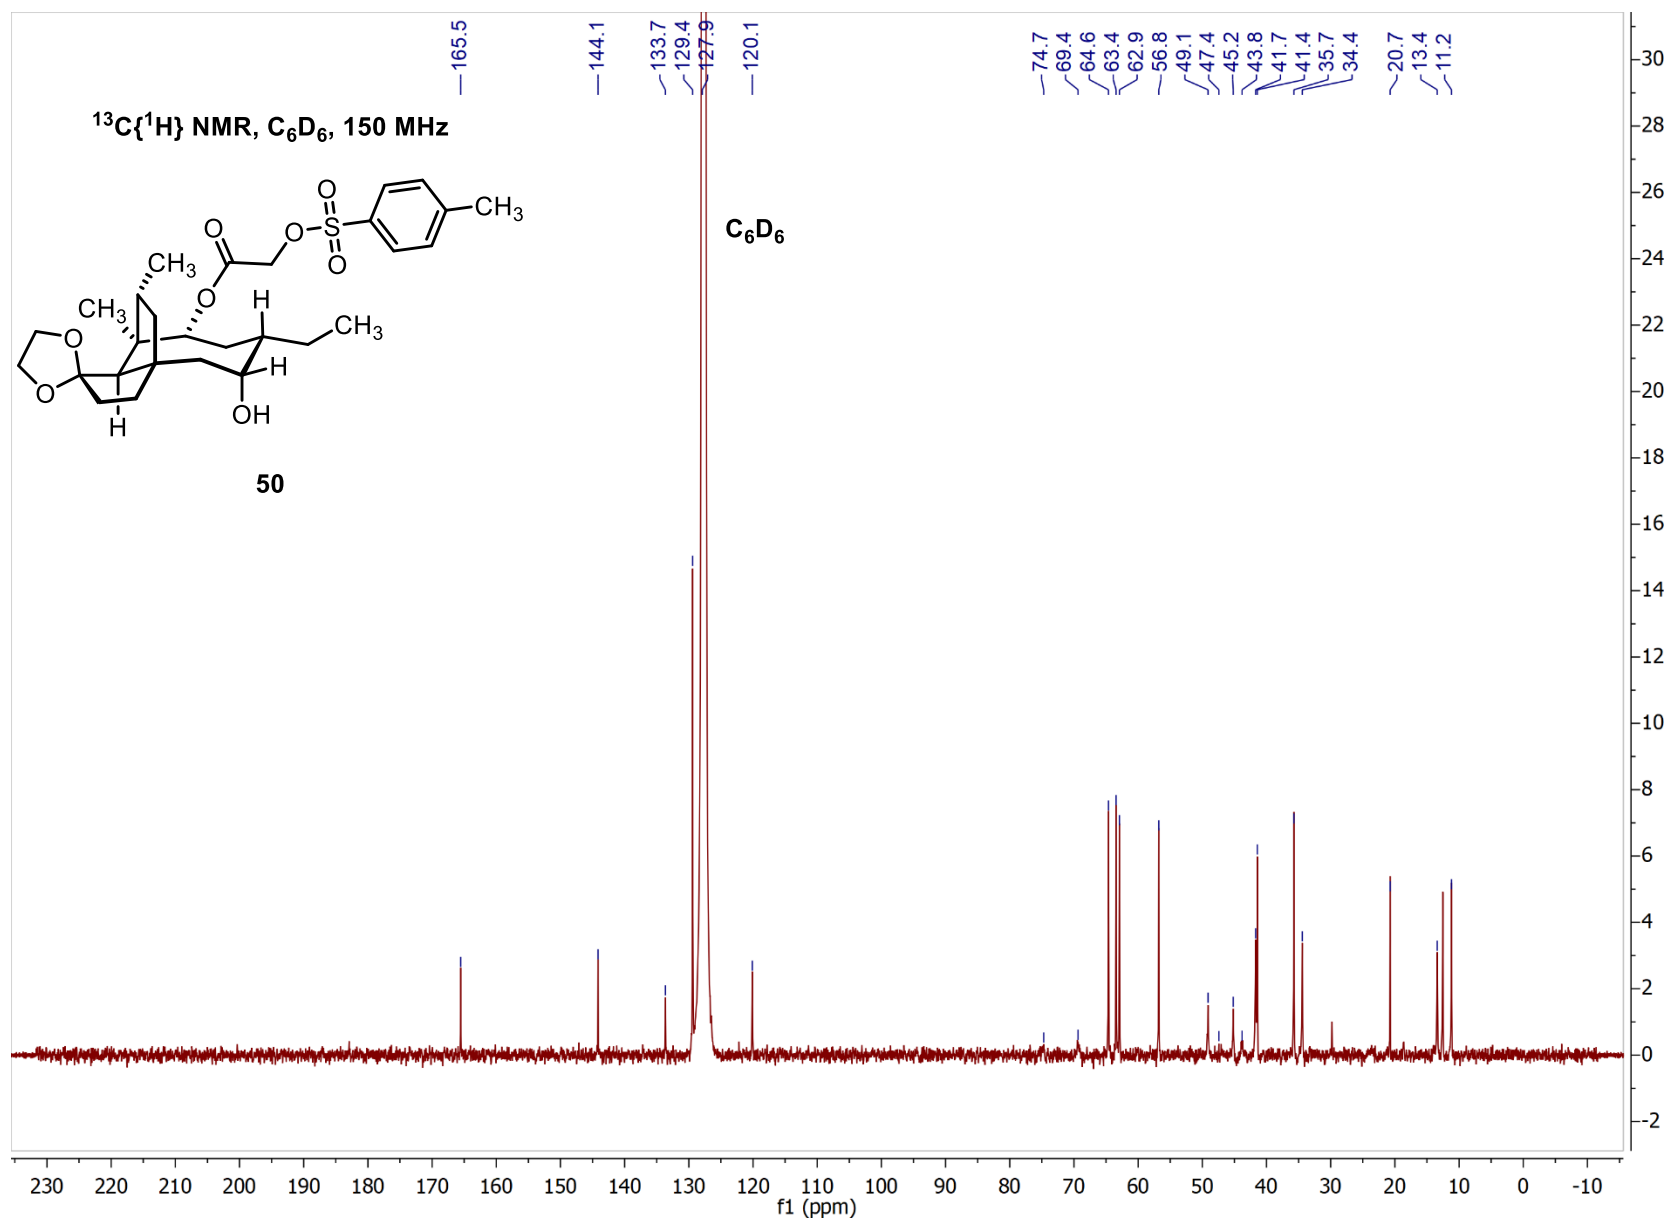



50, NOESY, C<sub>6</sub>D<sub>6</sub>, 500 MHz

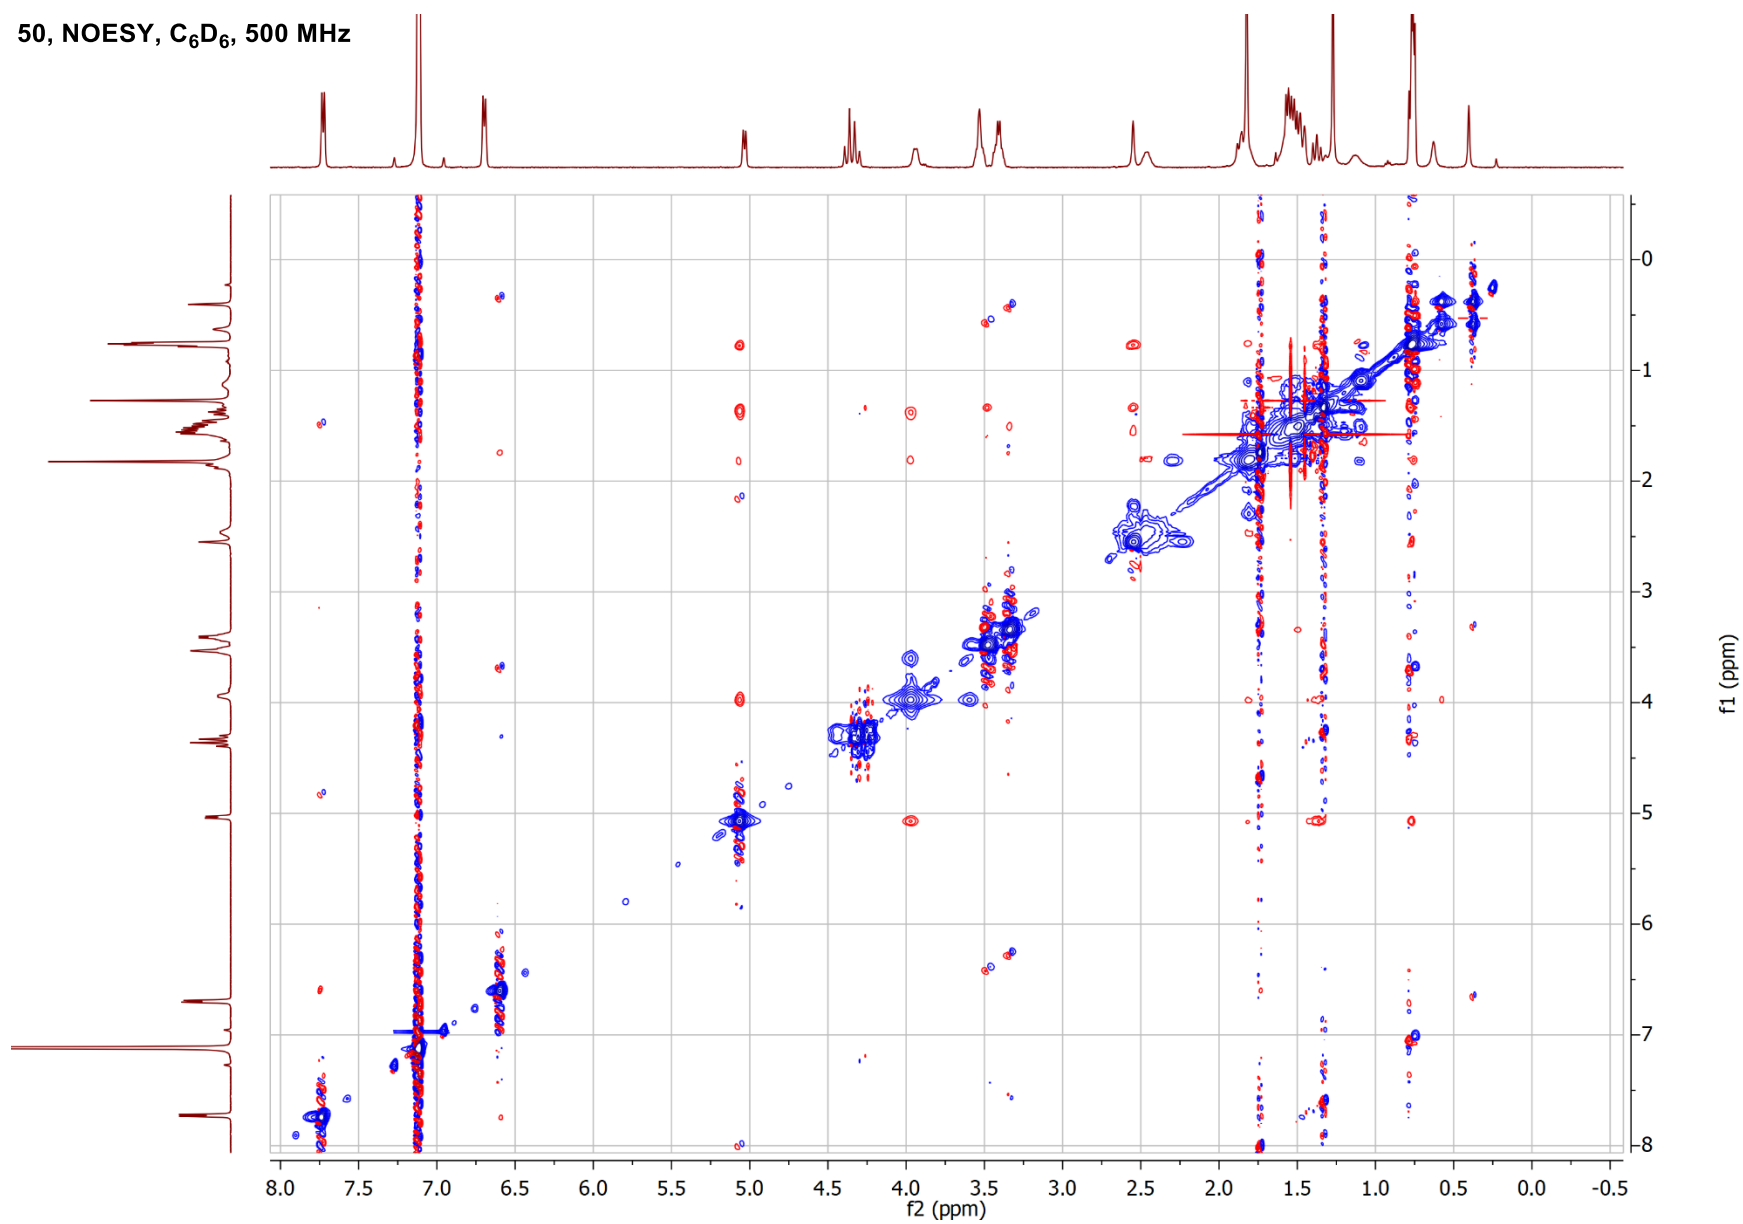

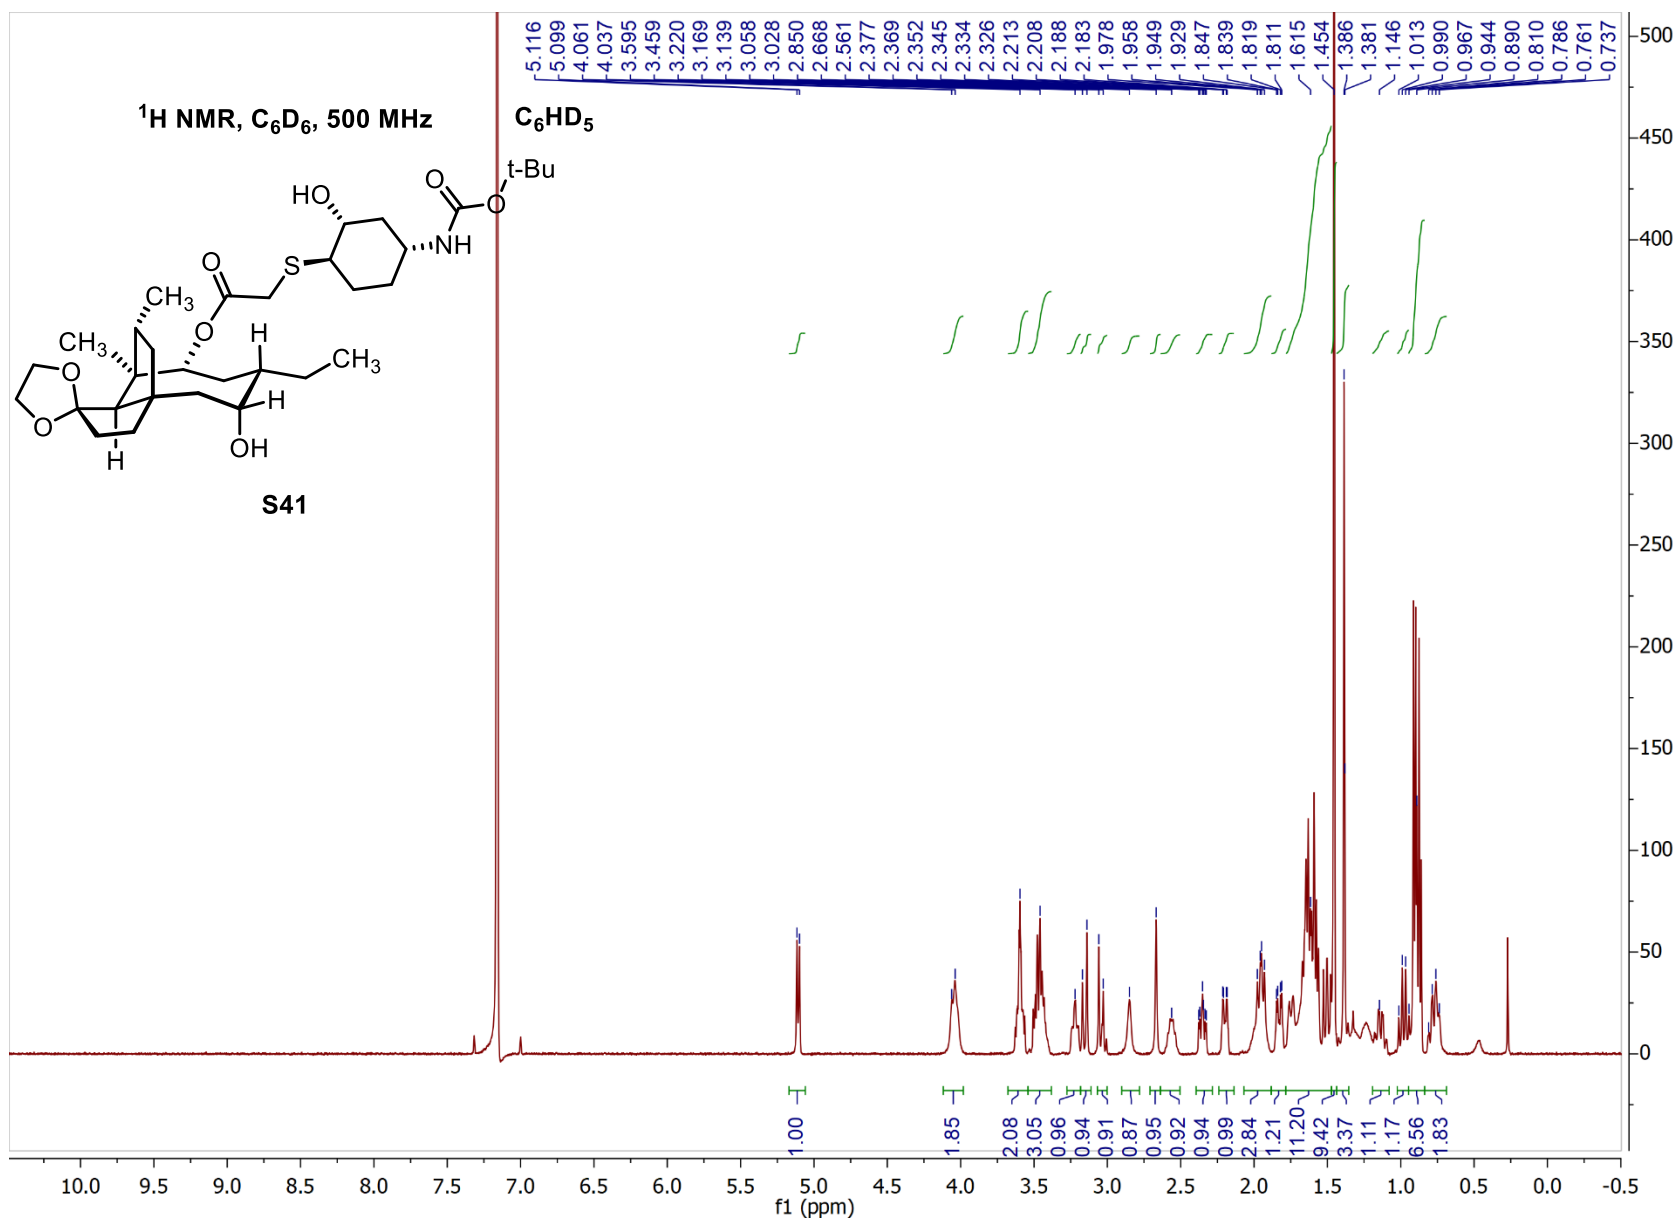

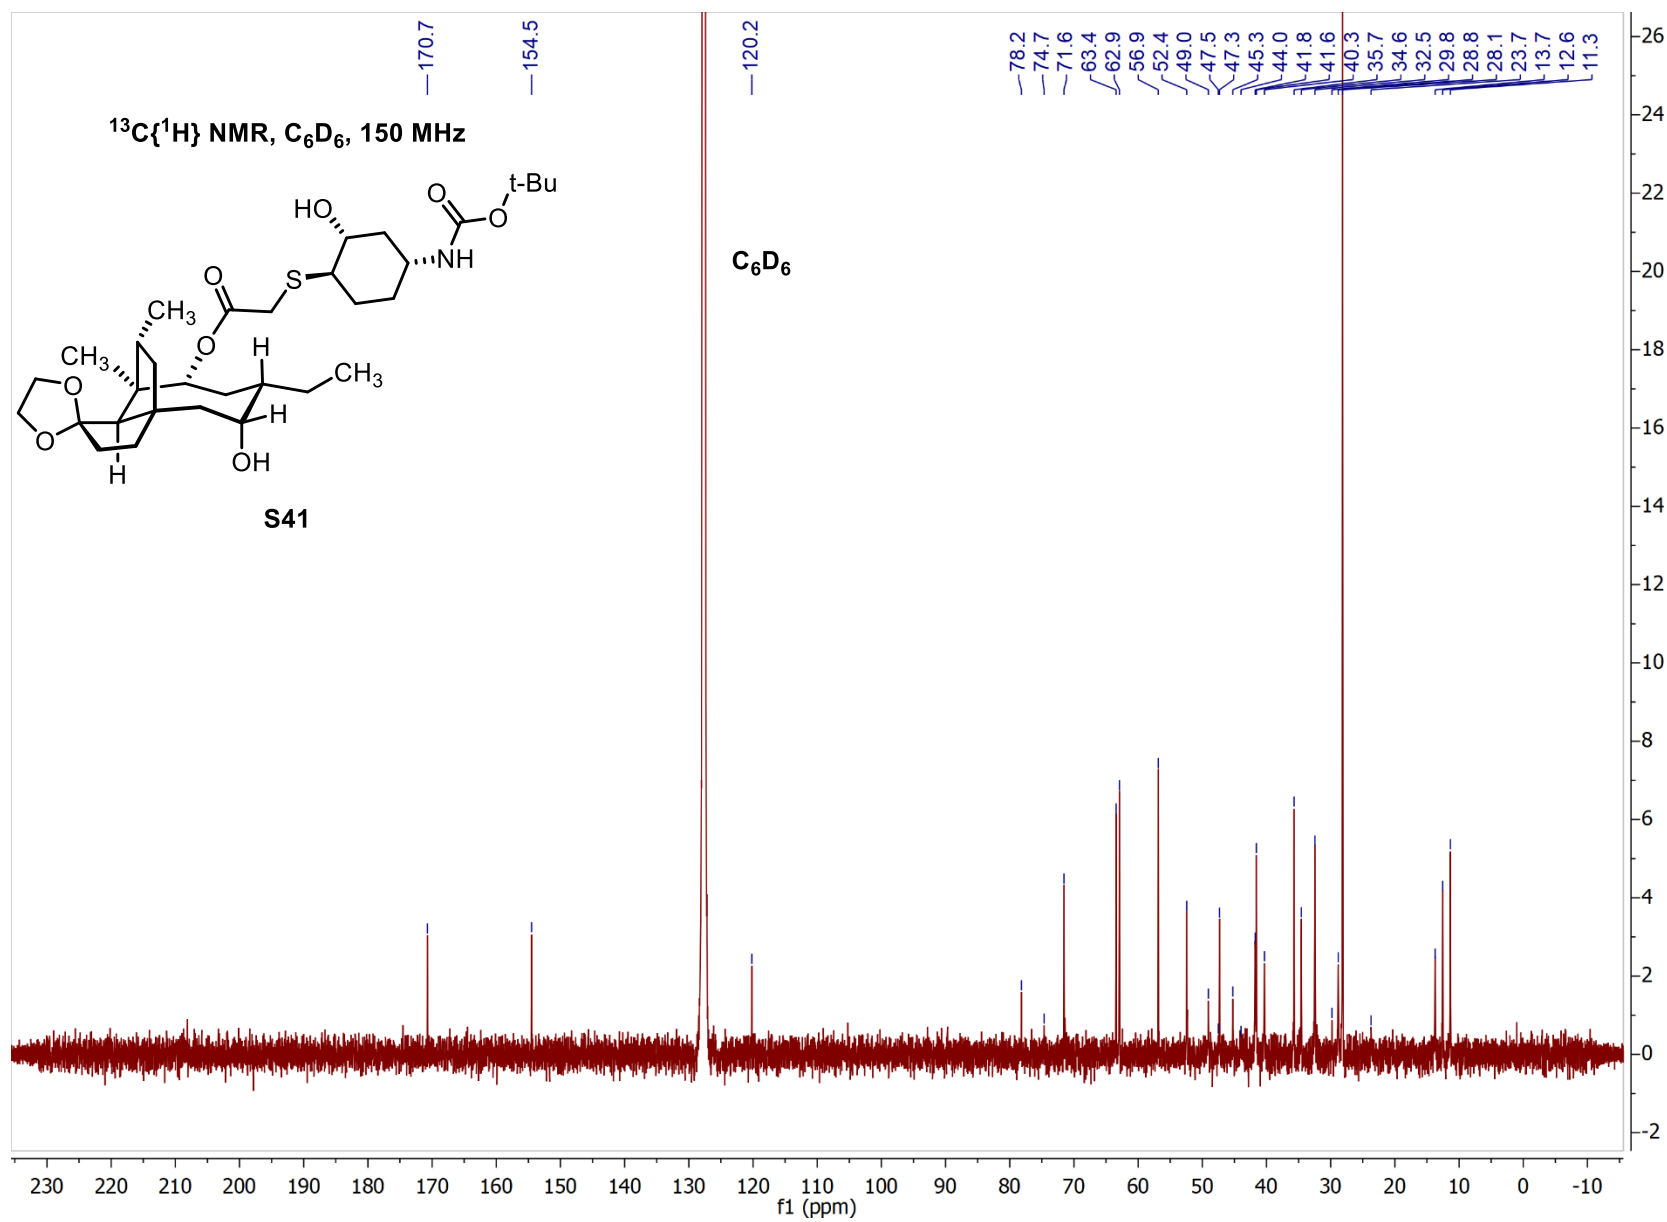

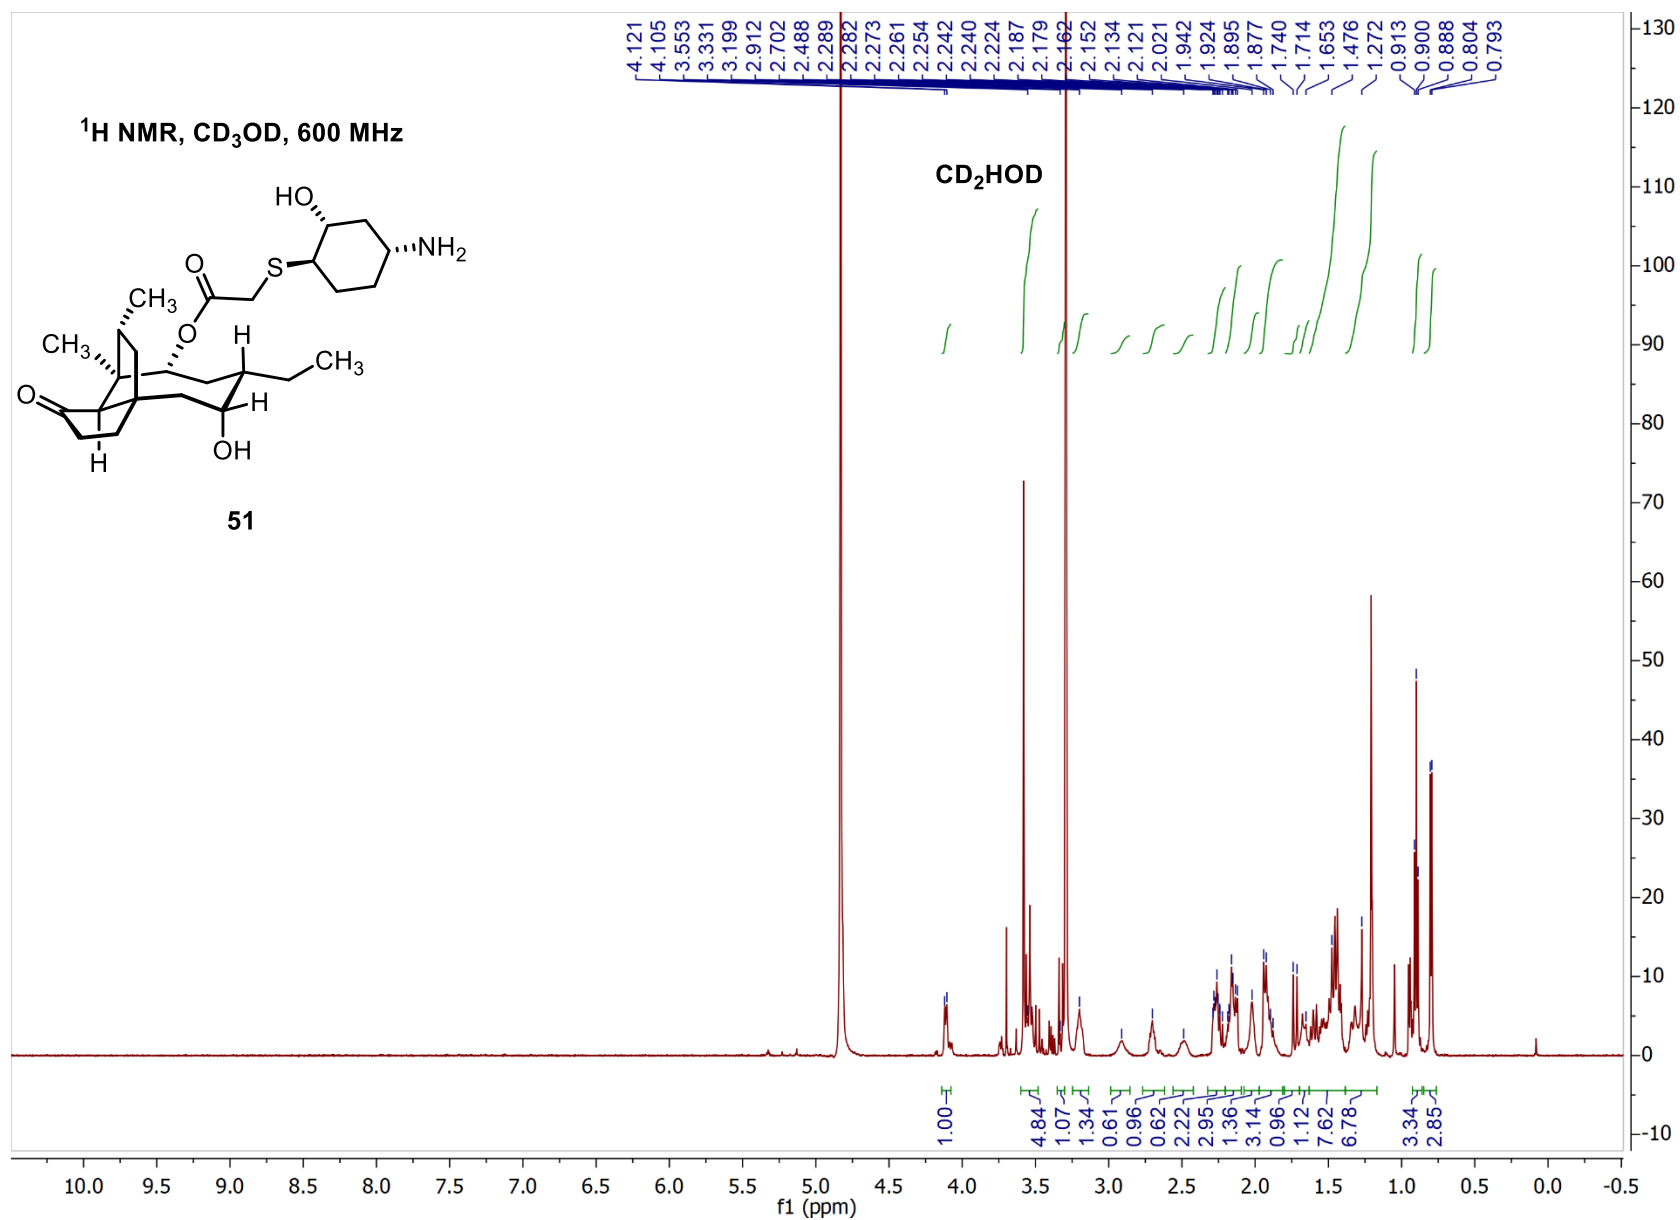

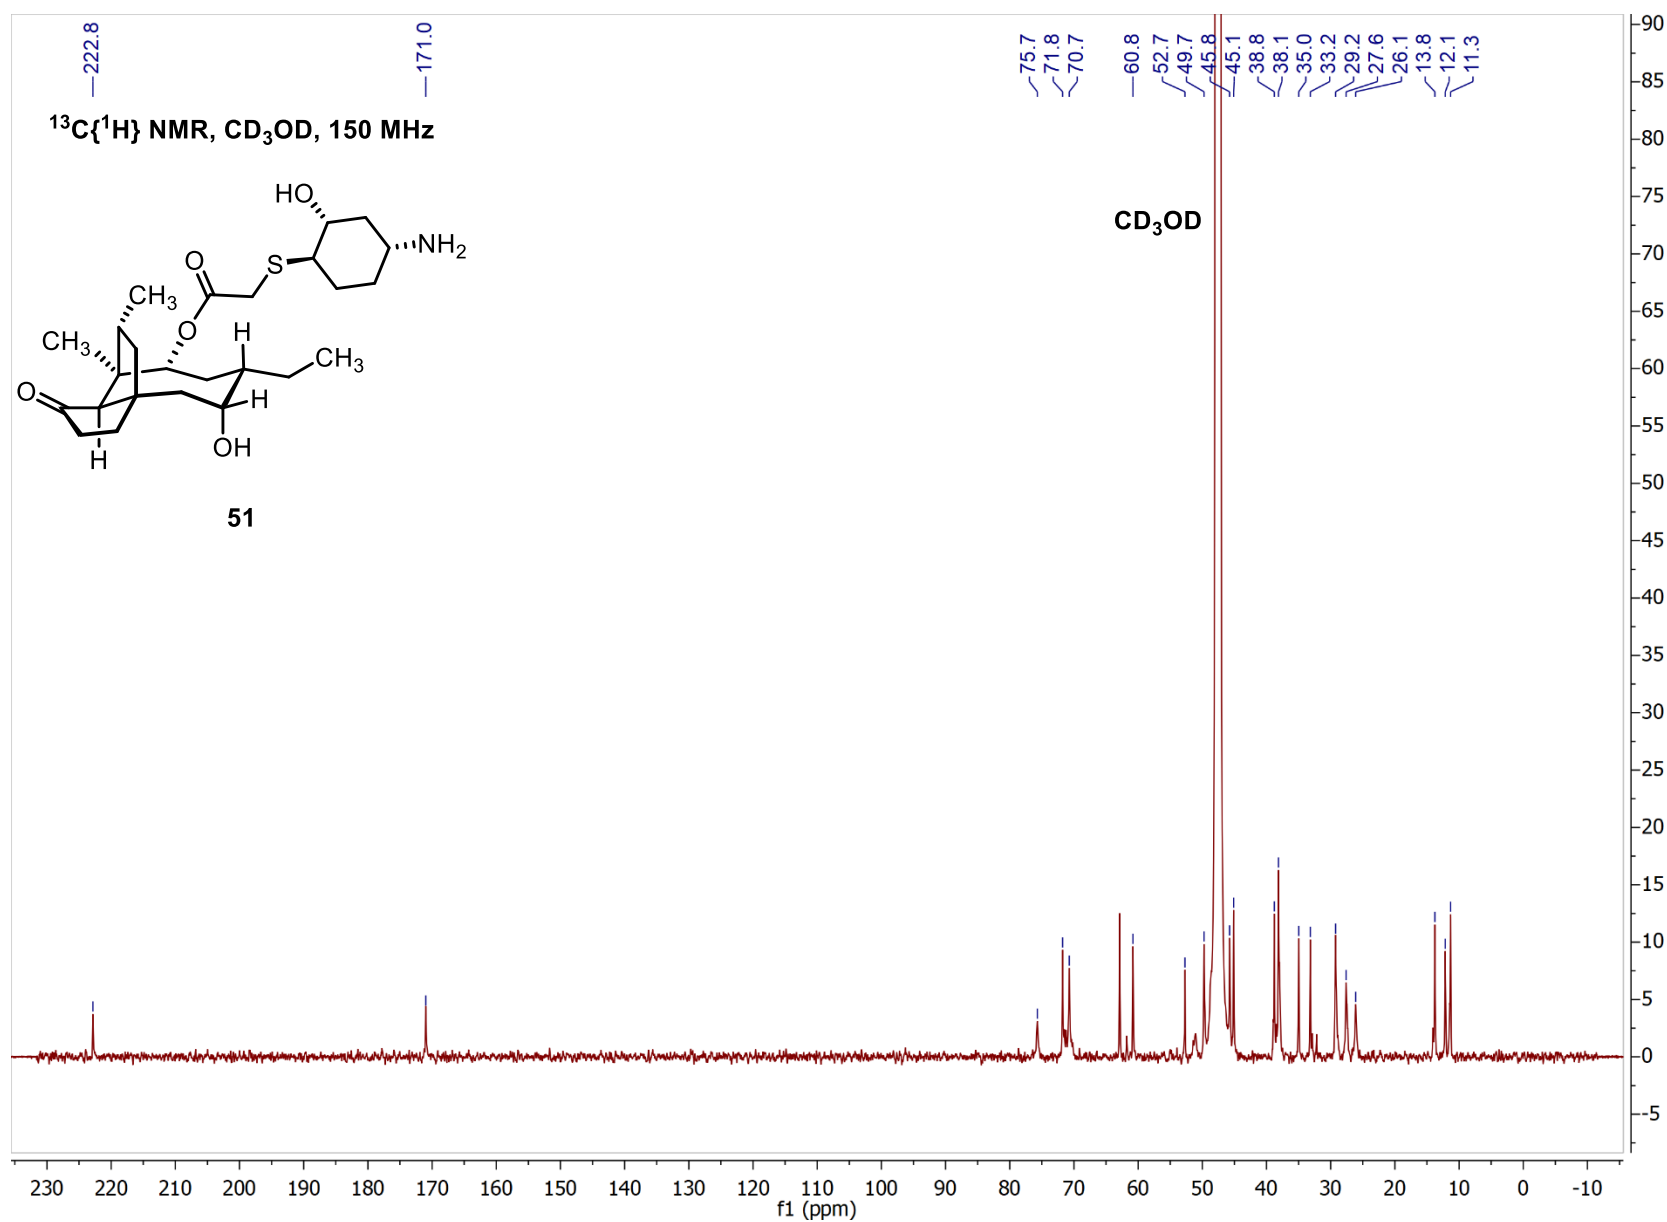

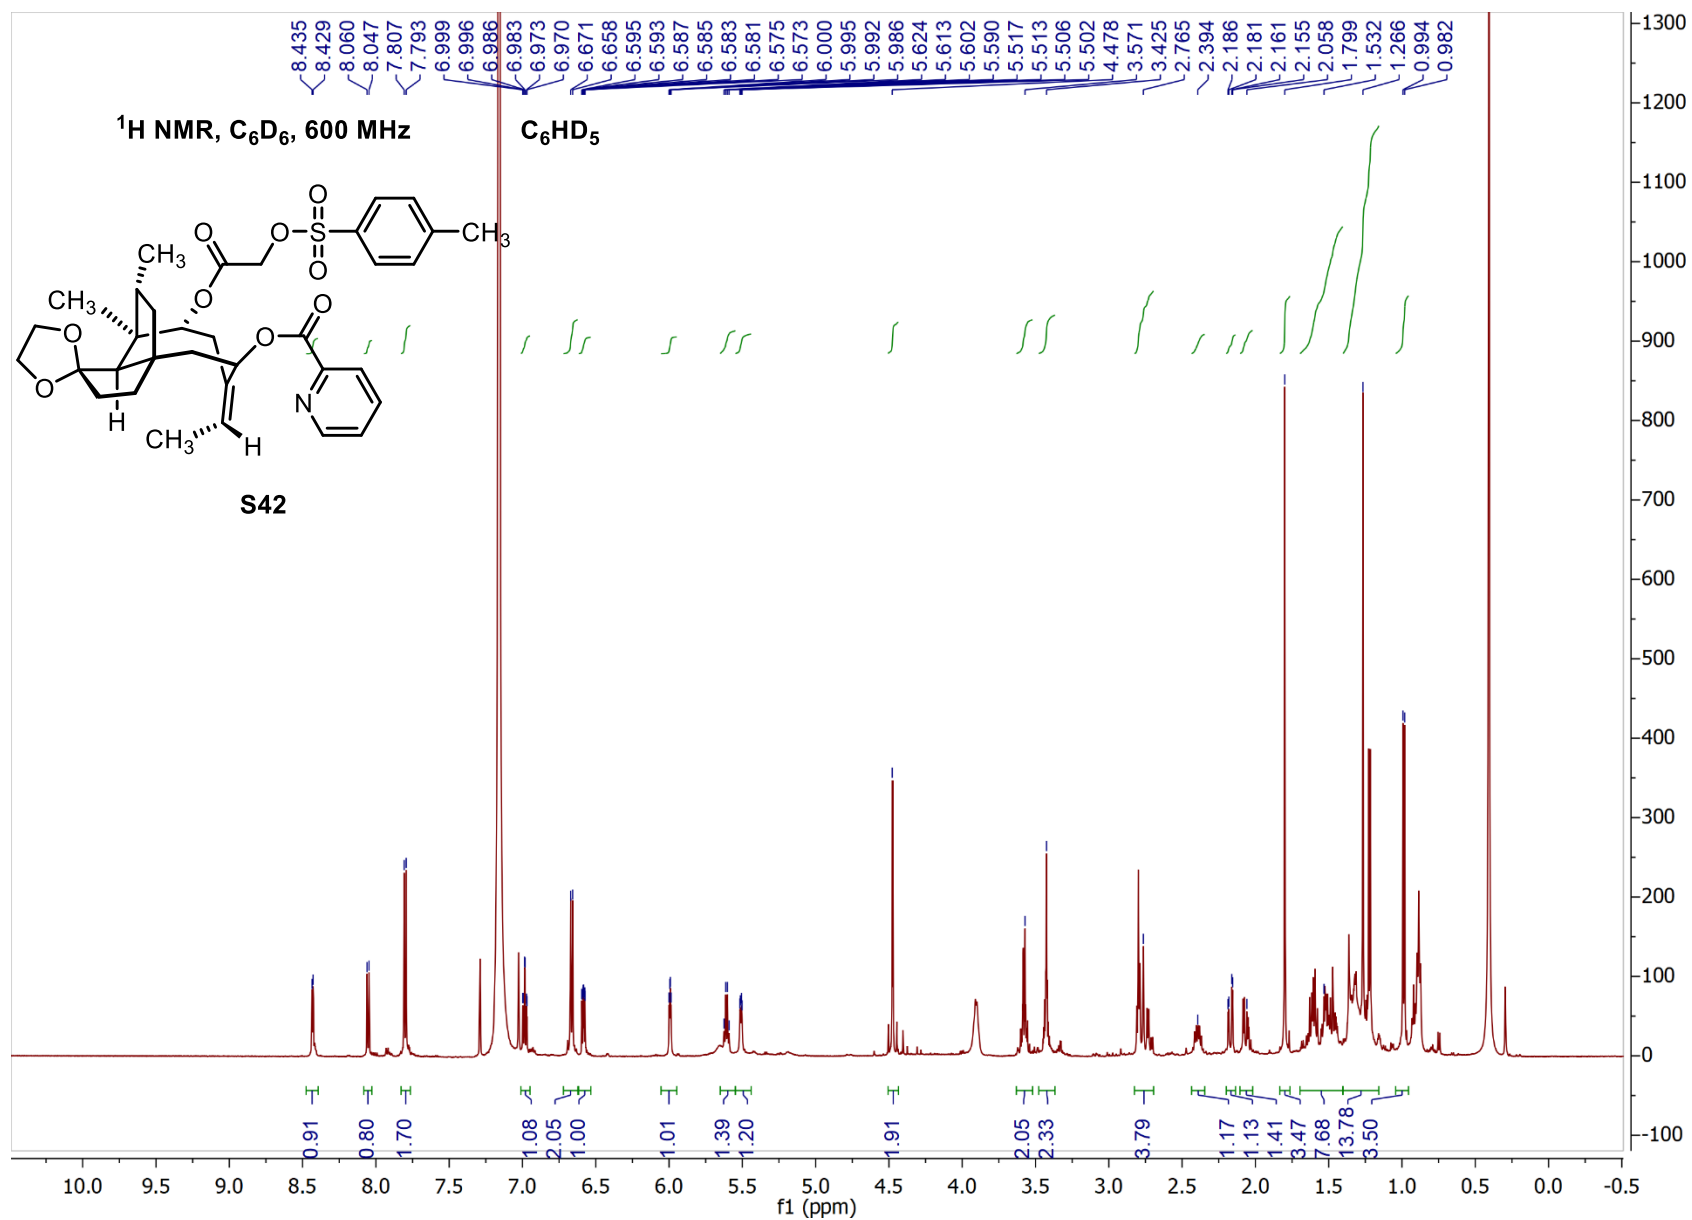

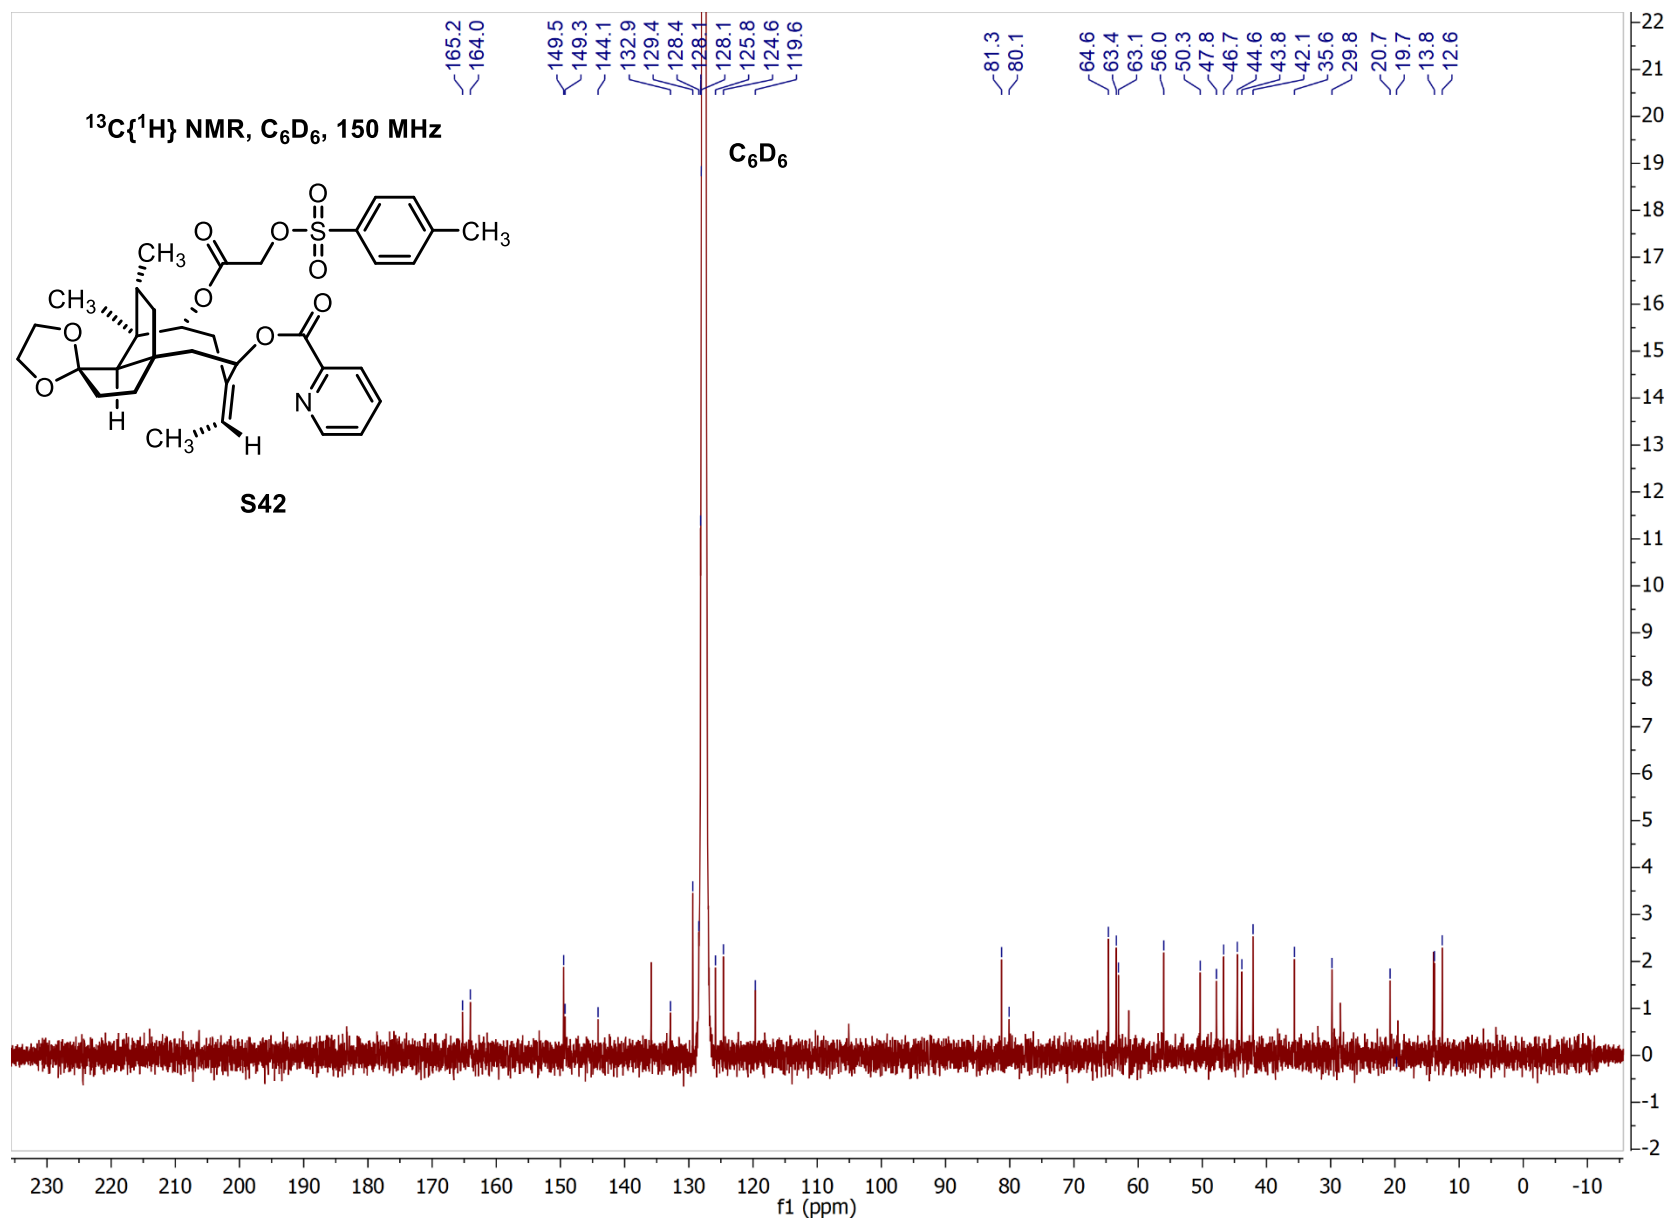

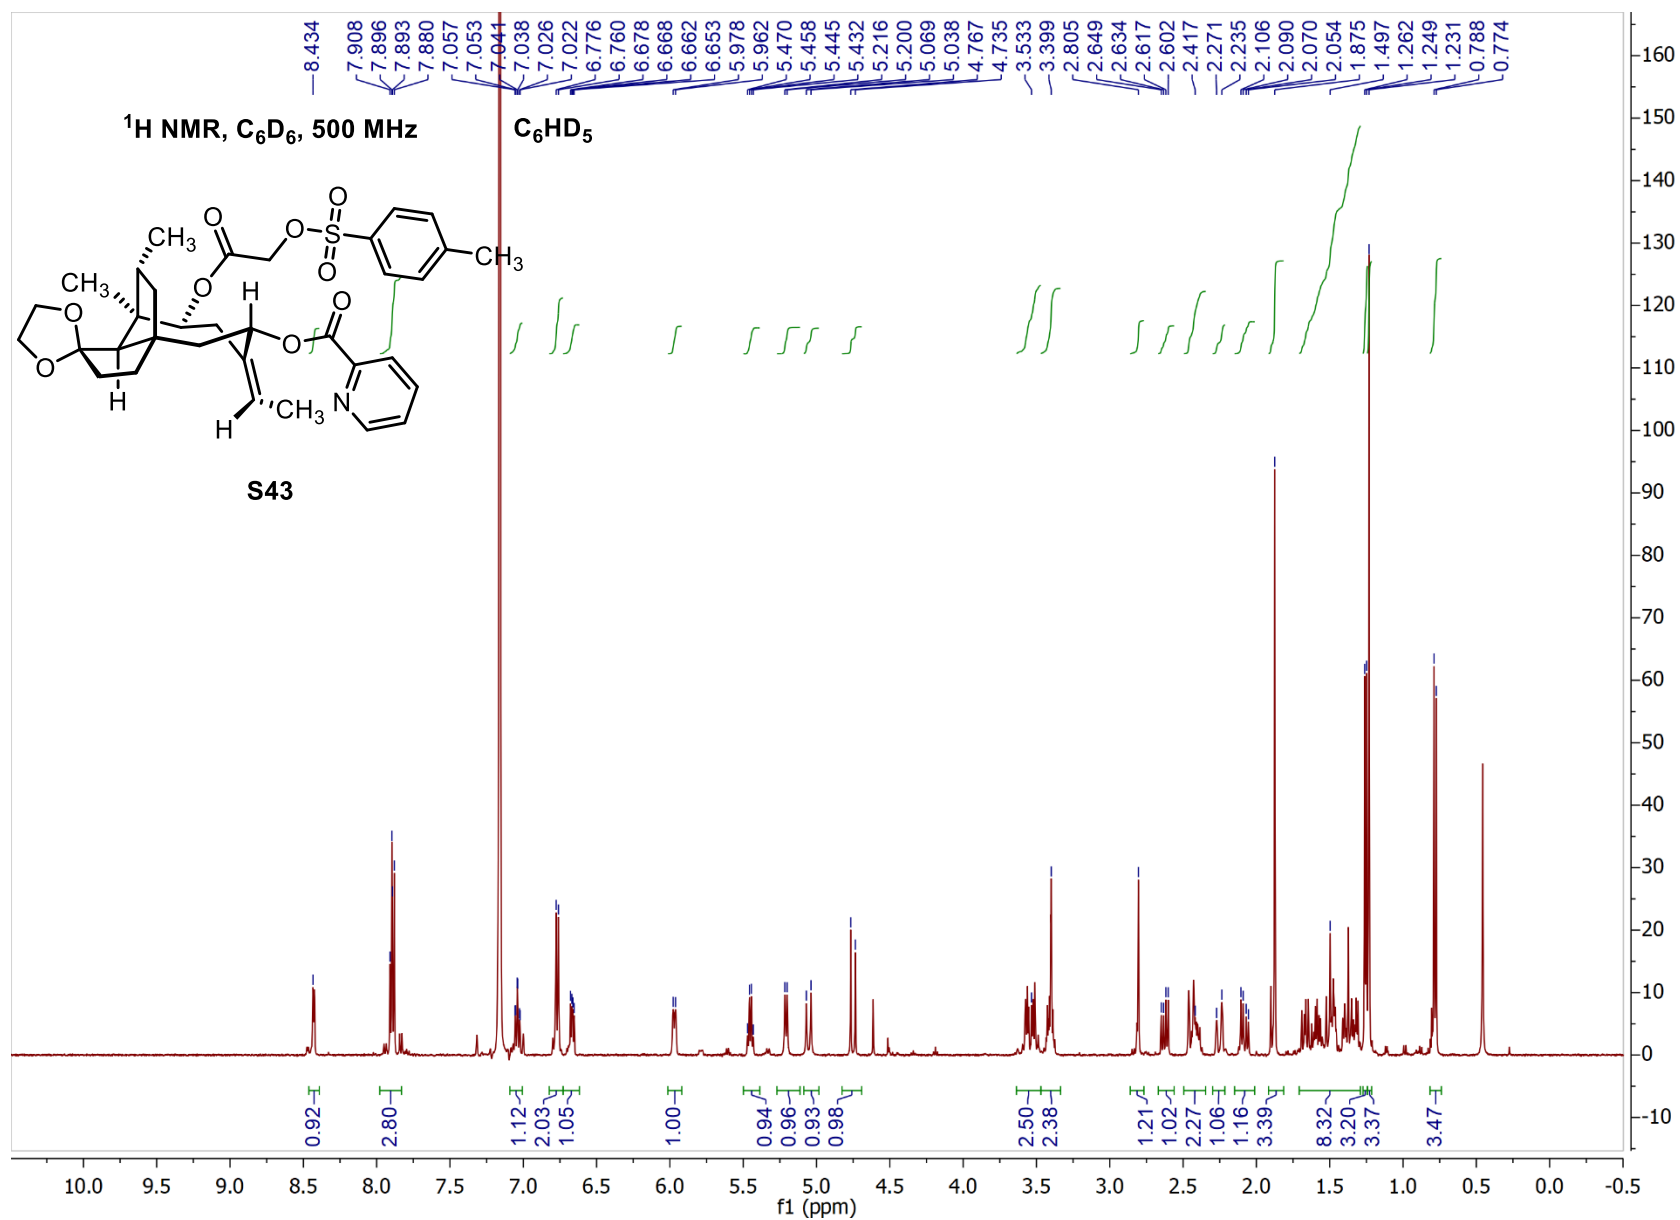



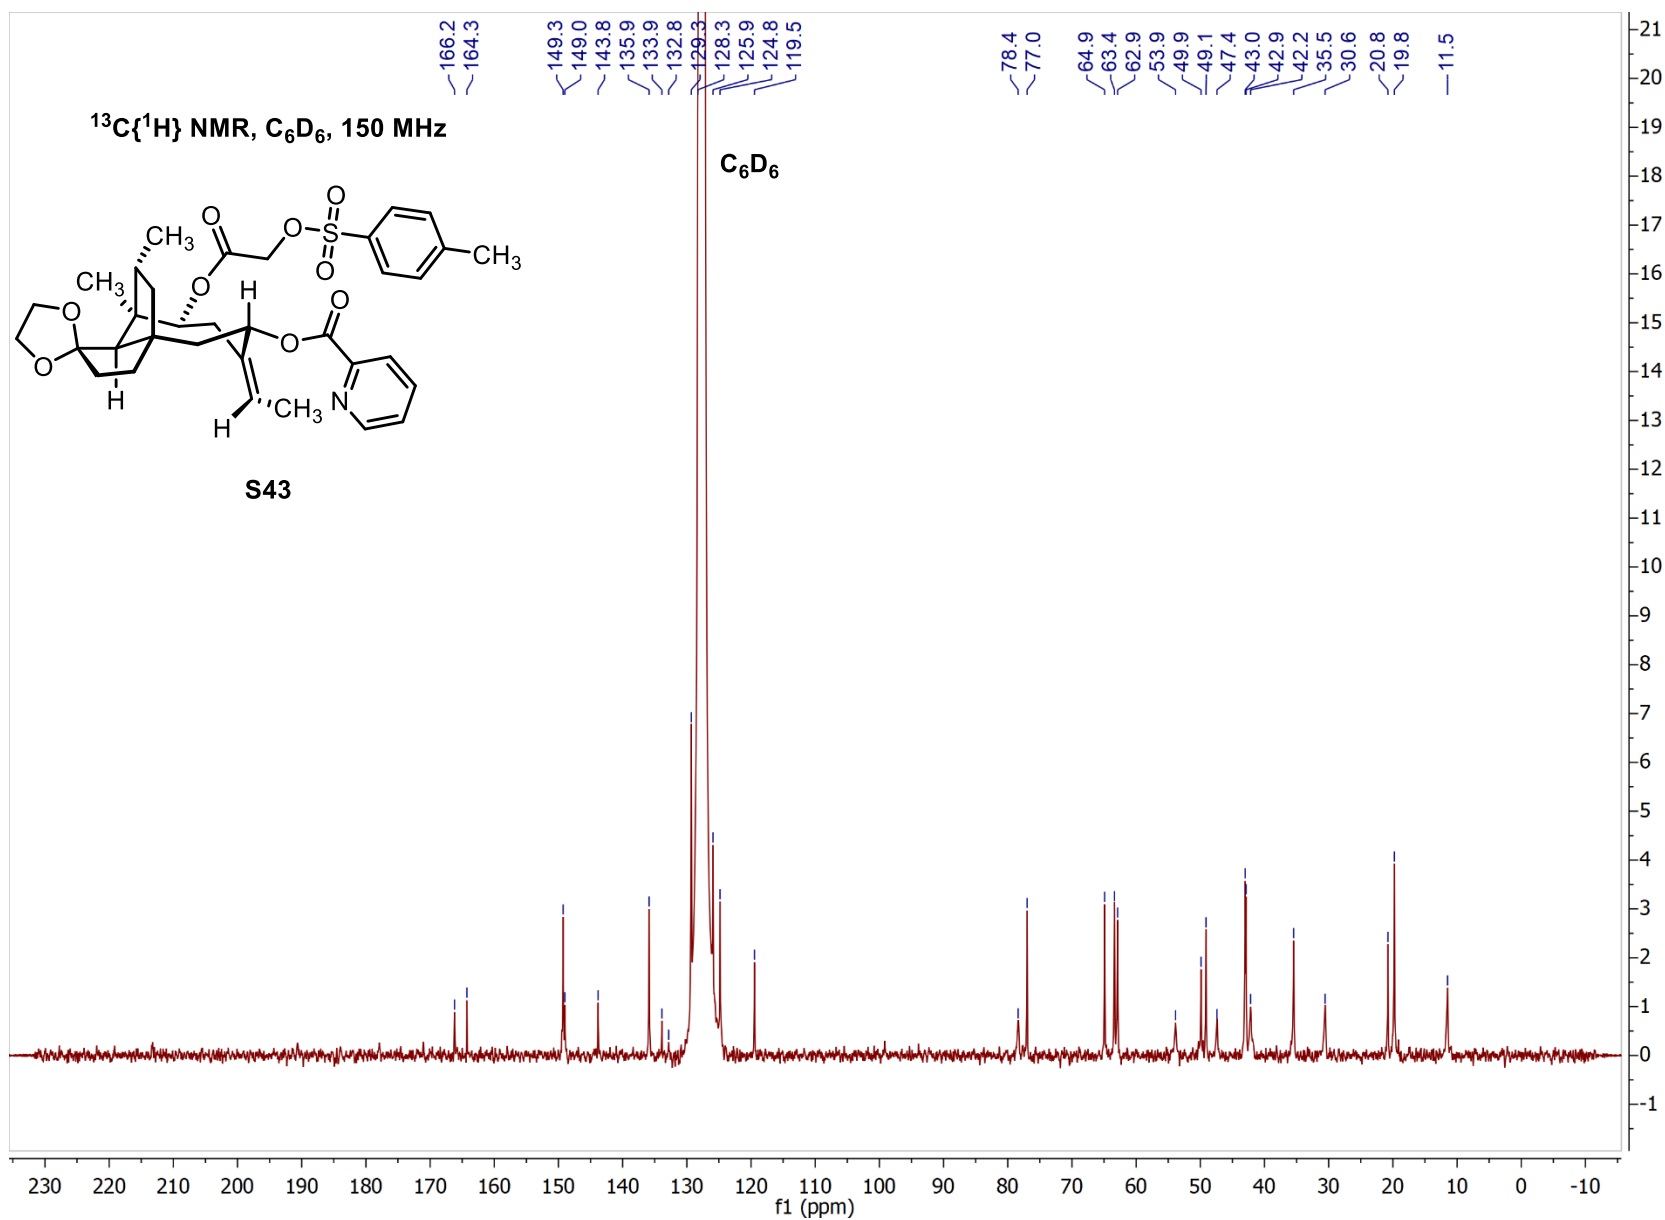

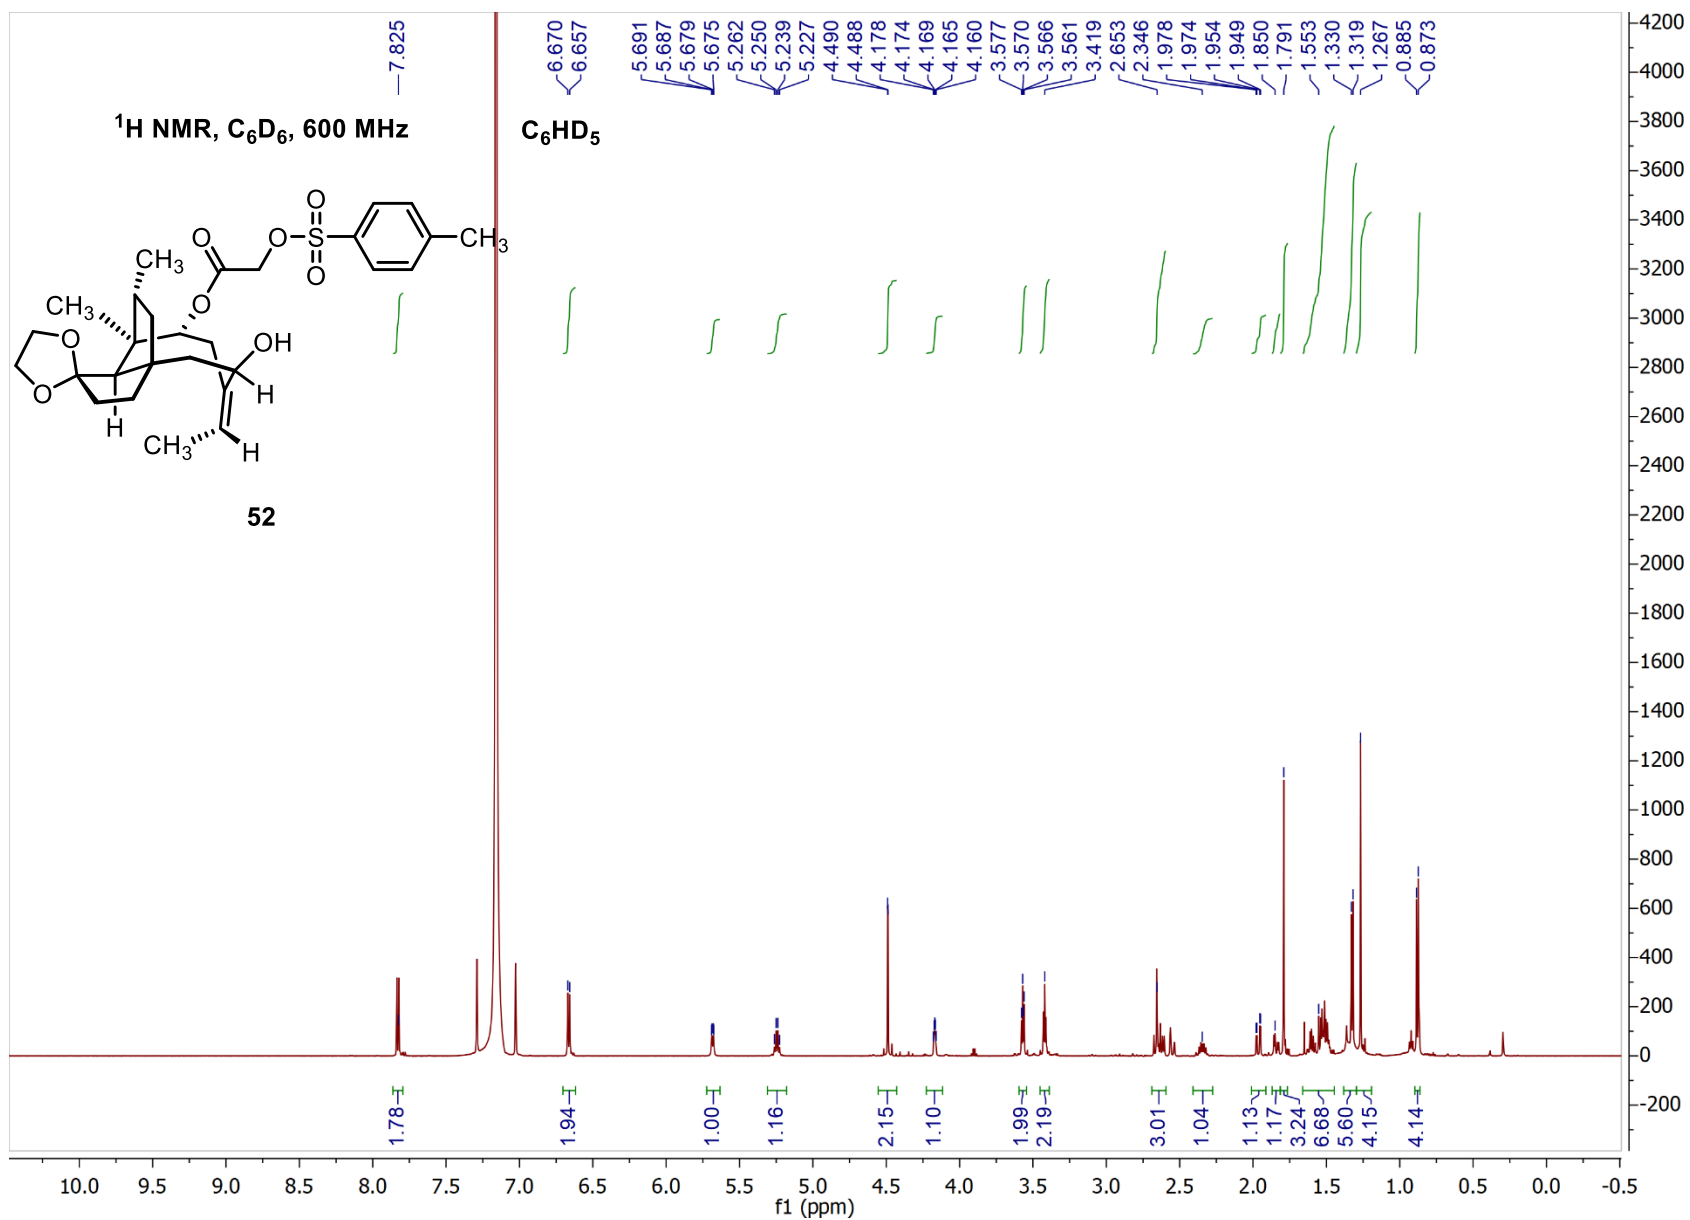

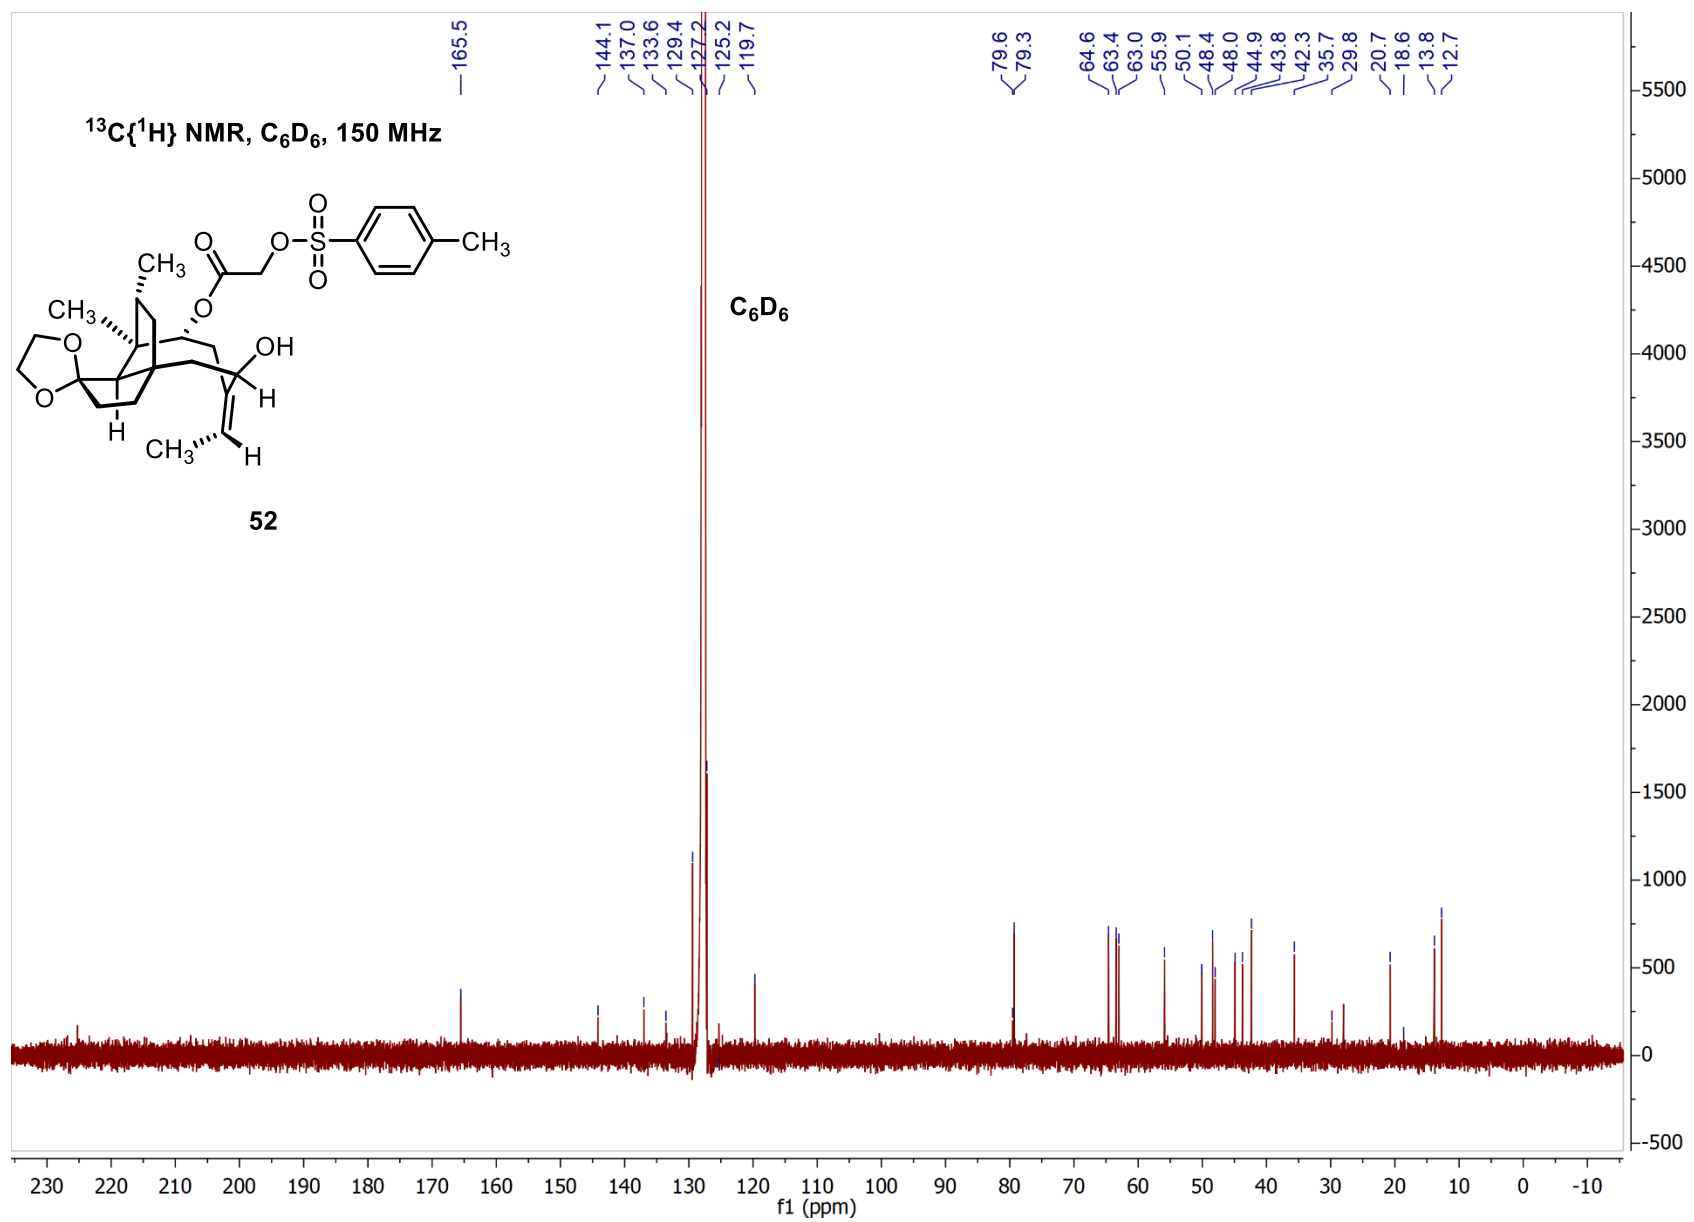

52, NOESY, C<sub>6</sub>D<sub>6</sub>, 500 MHz

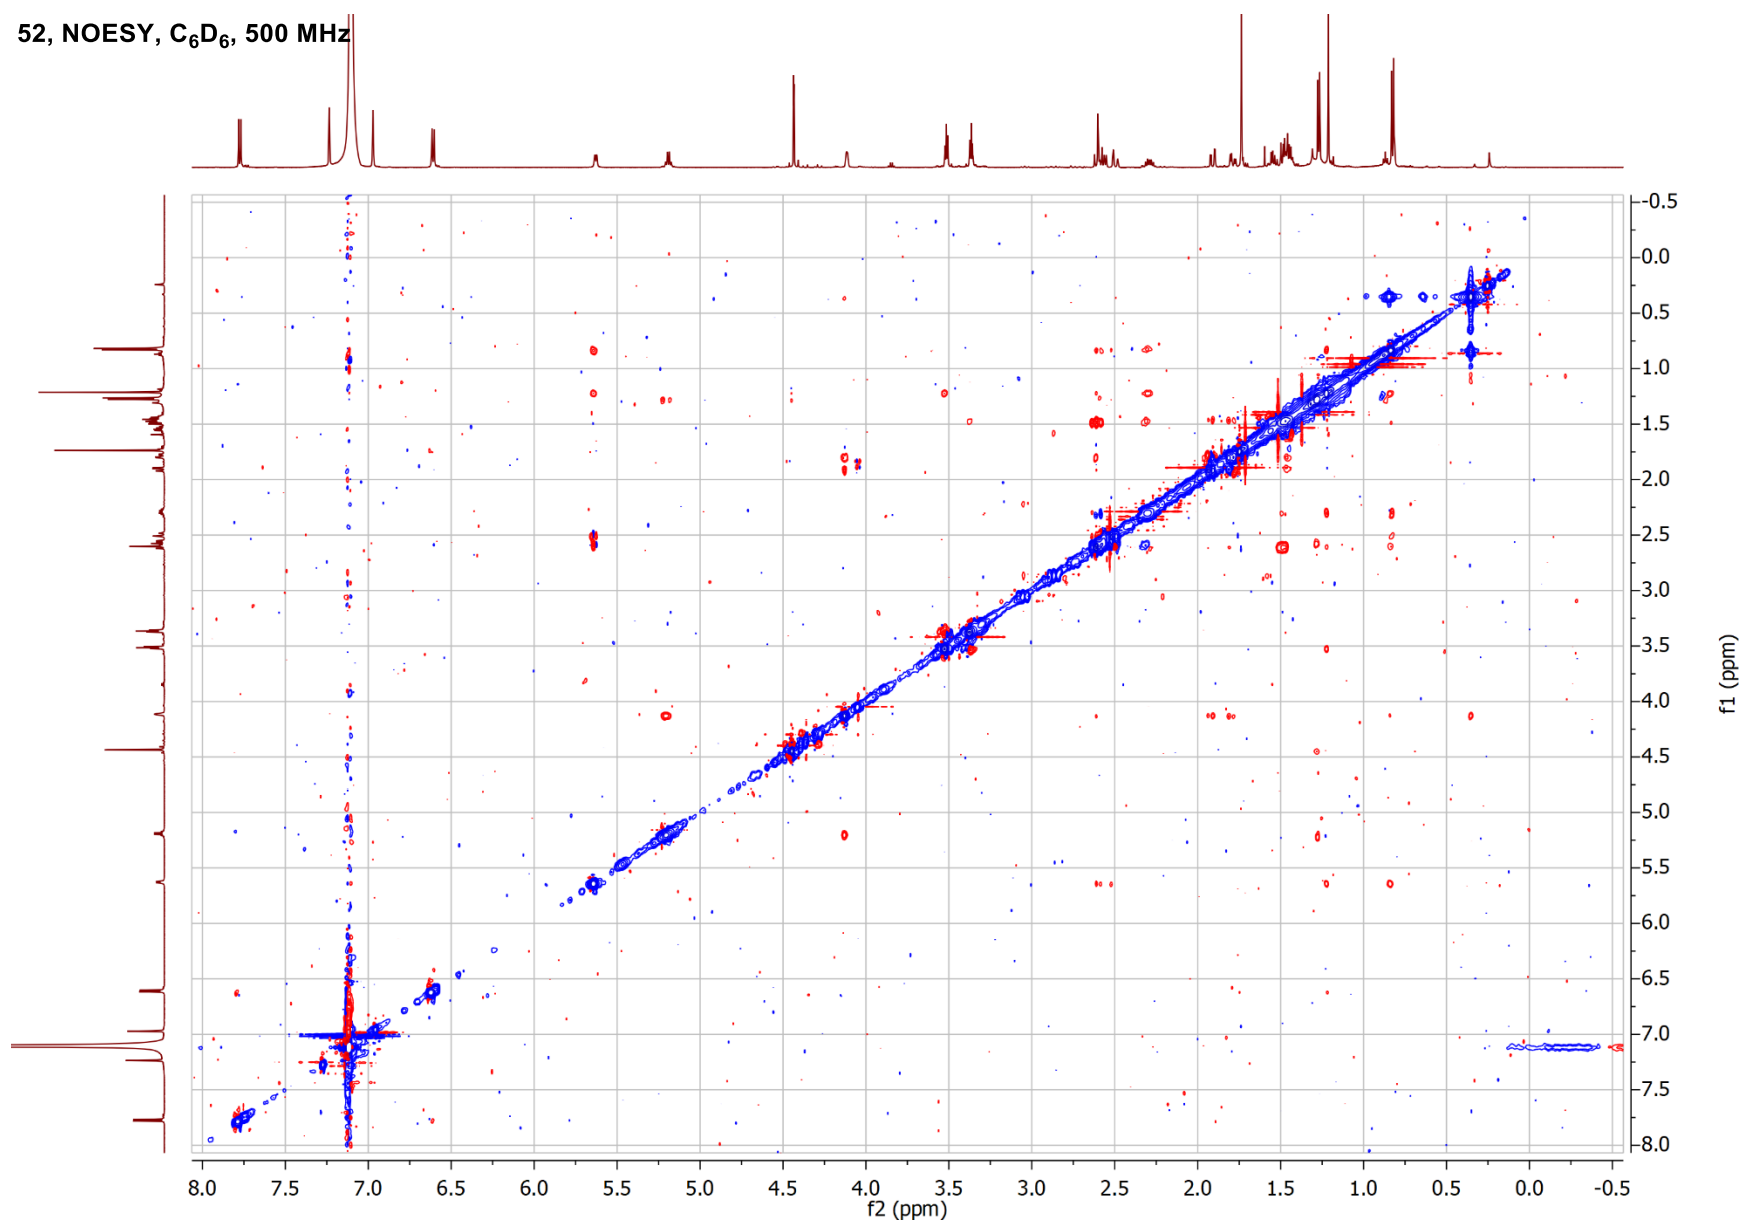

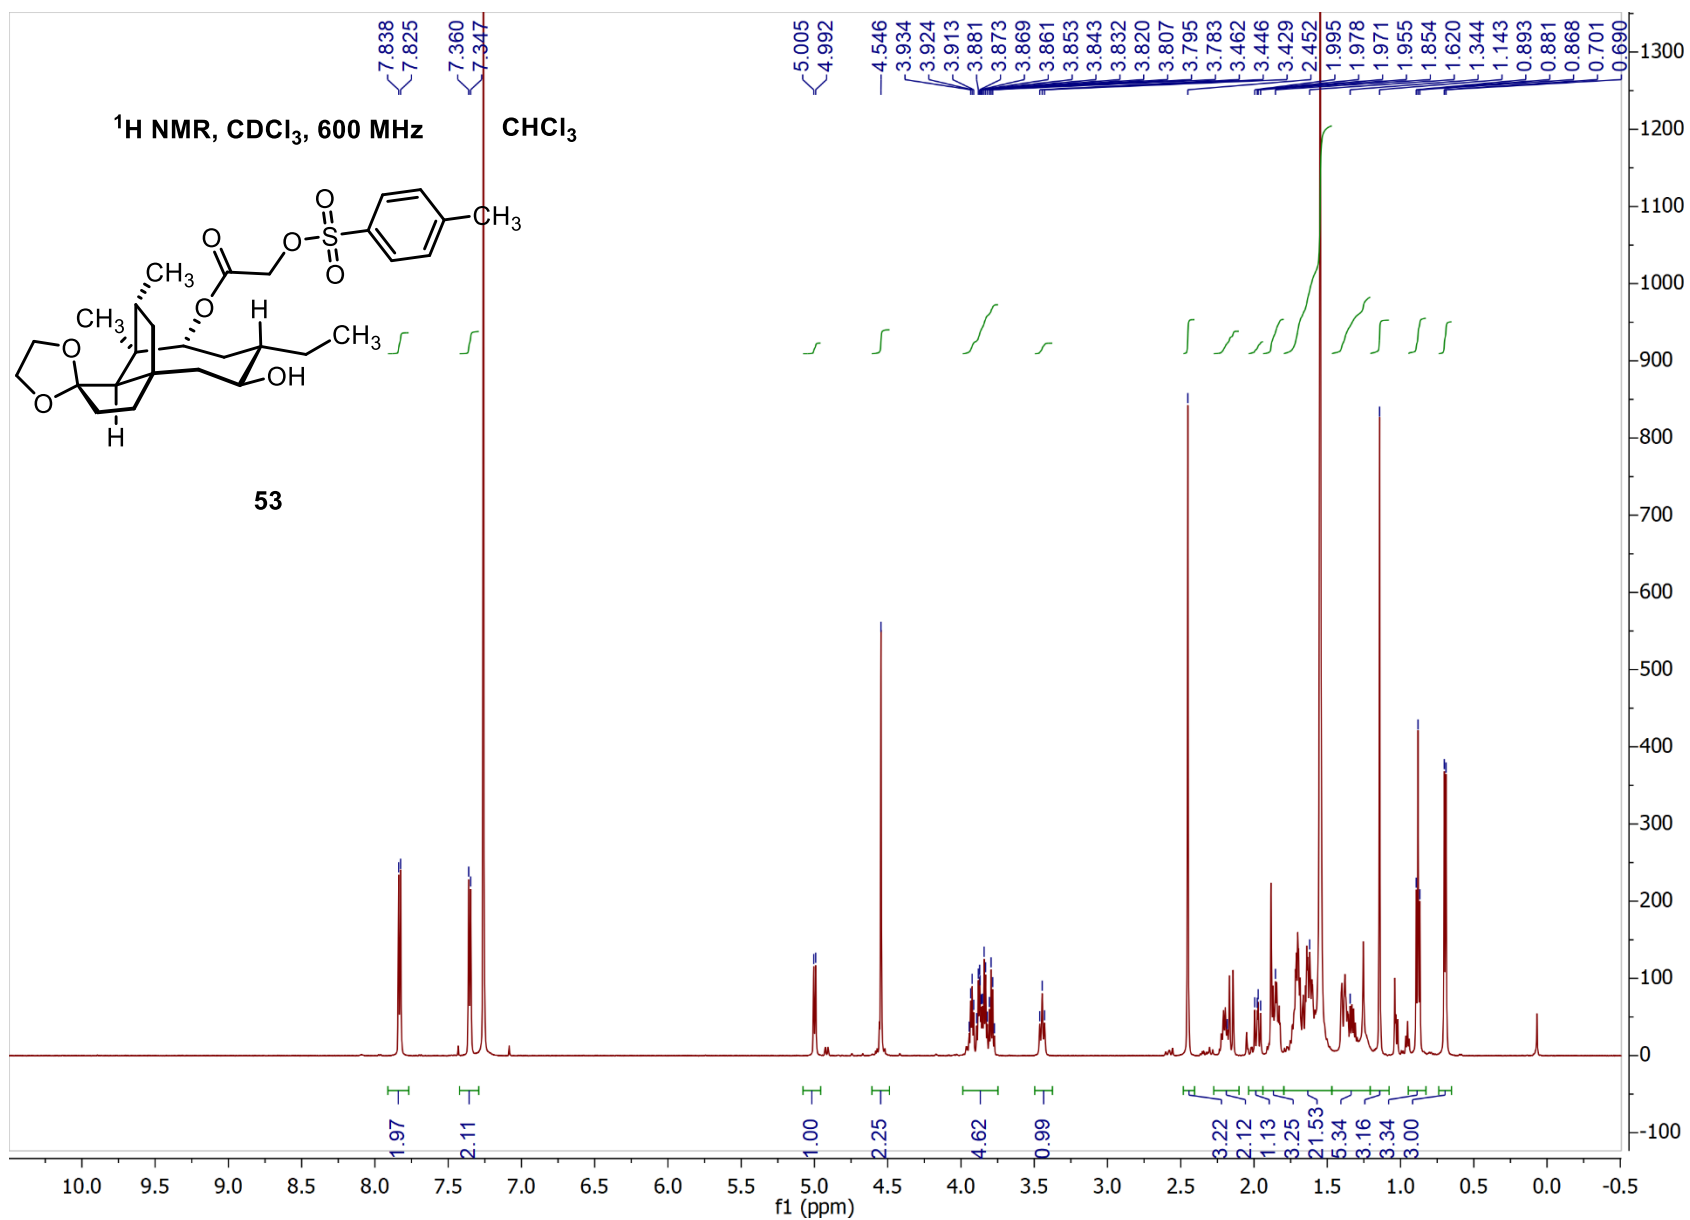

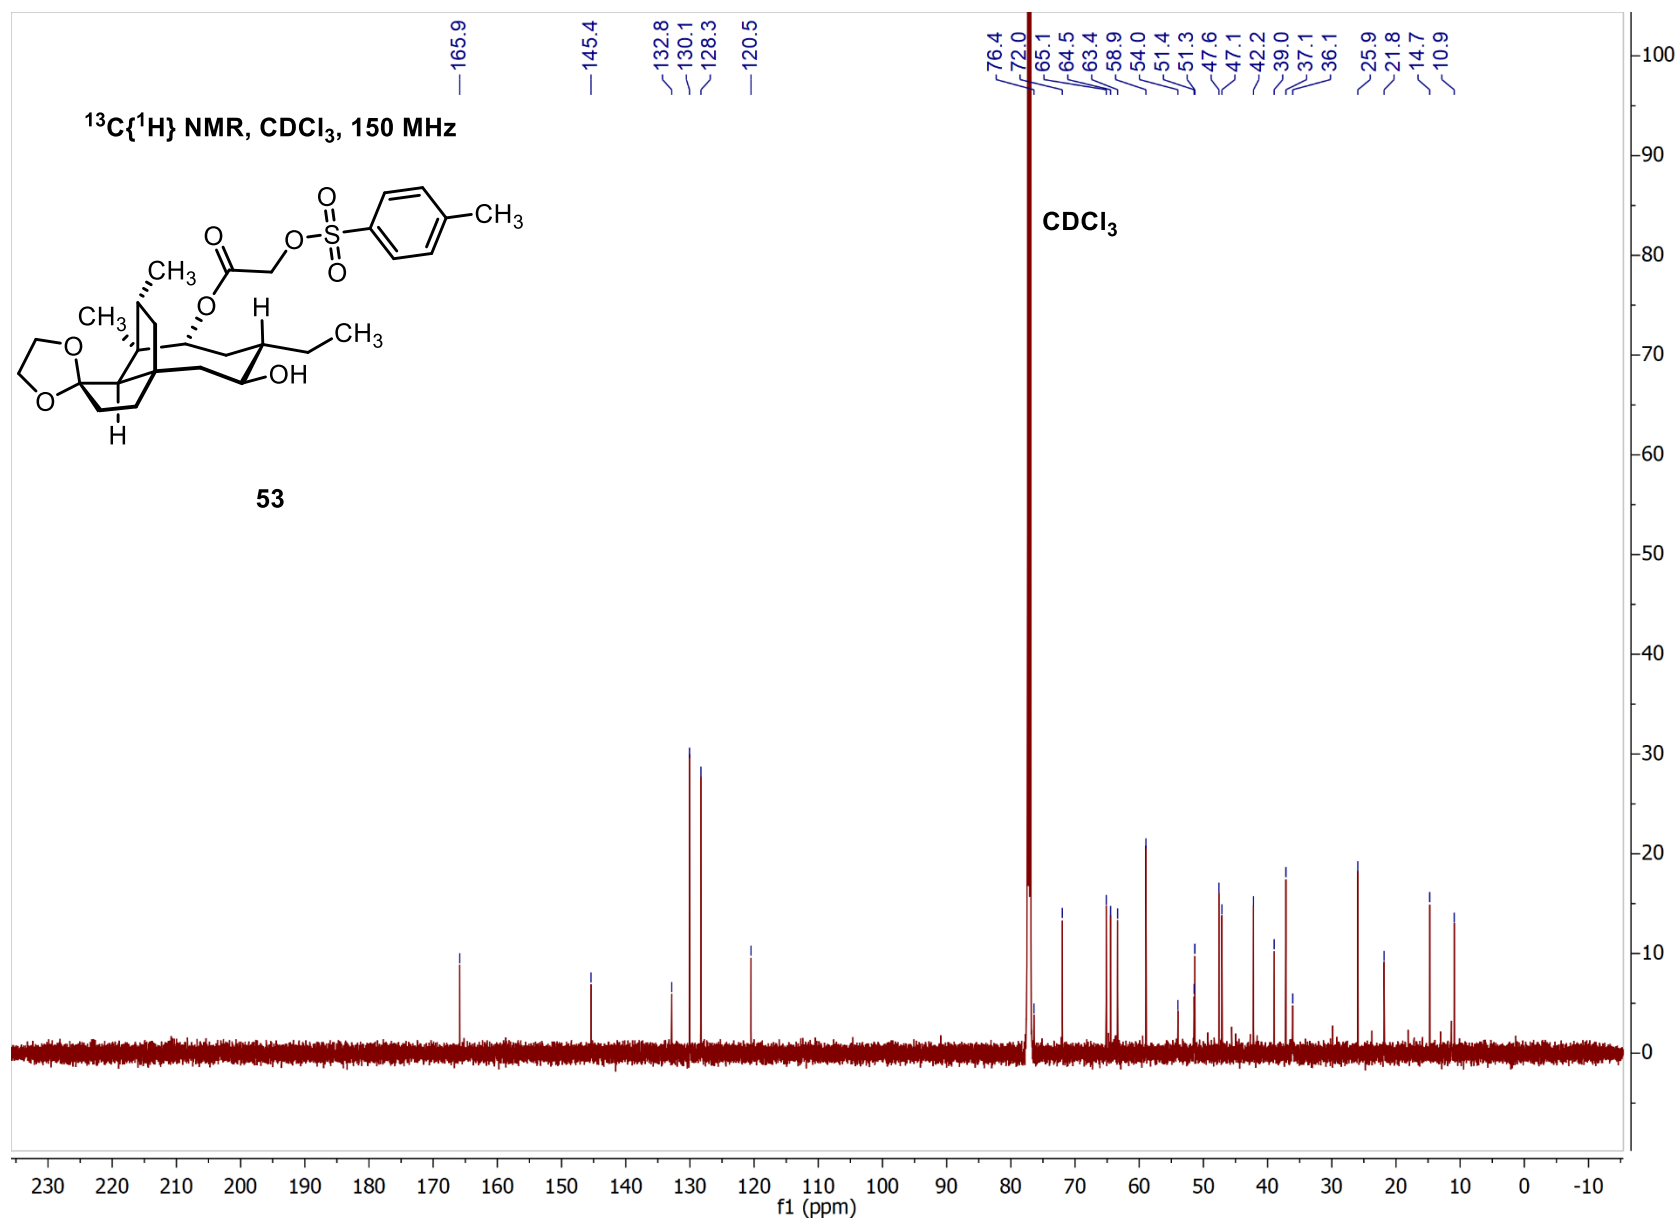

53, NOESY, CDCl<sub>3</sub>, 500 MHz

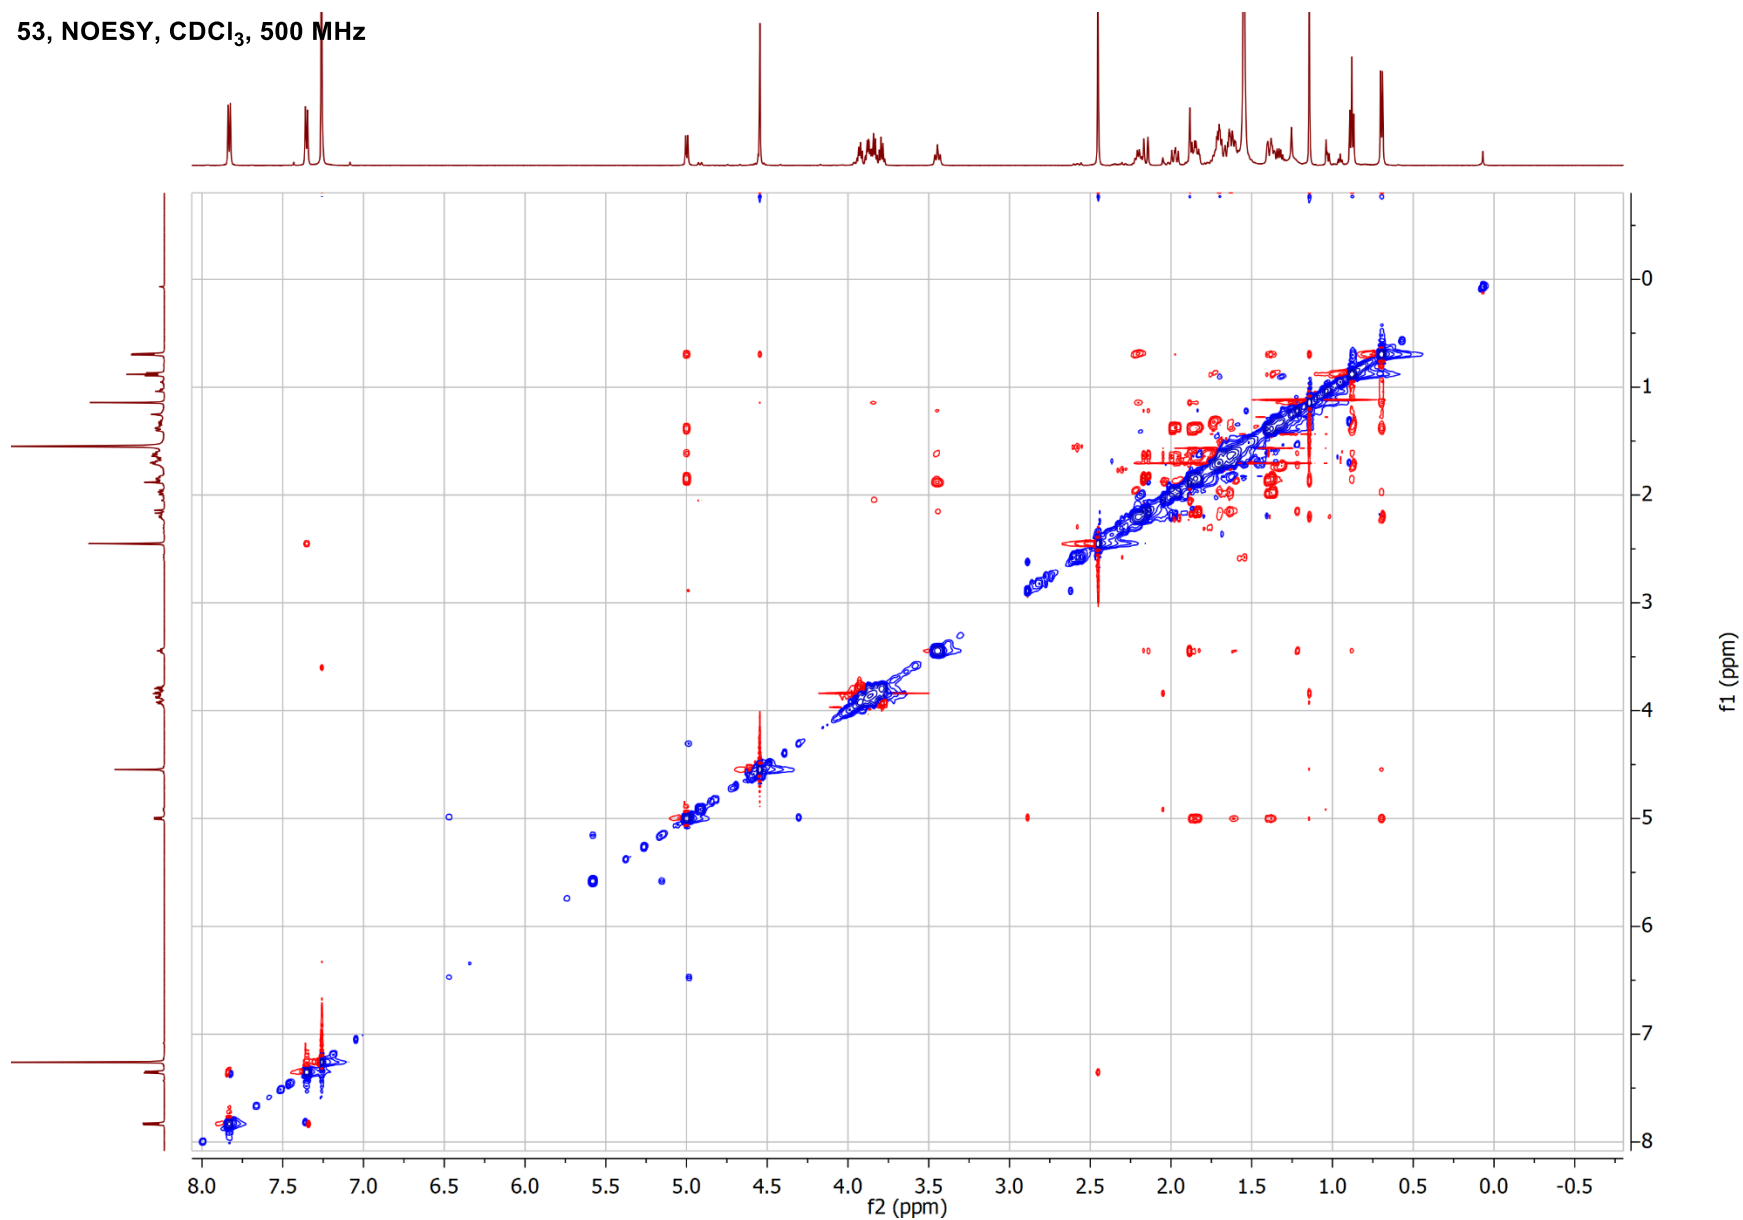

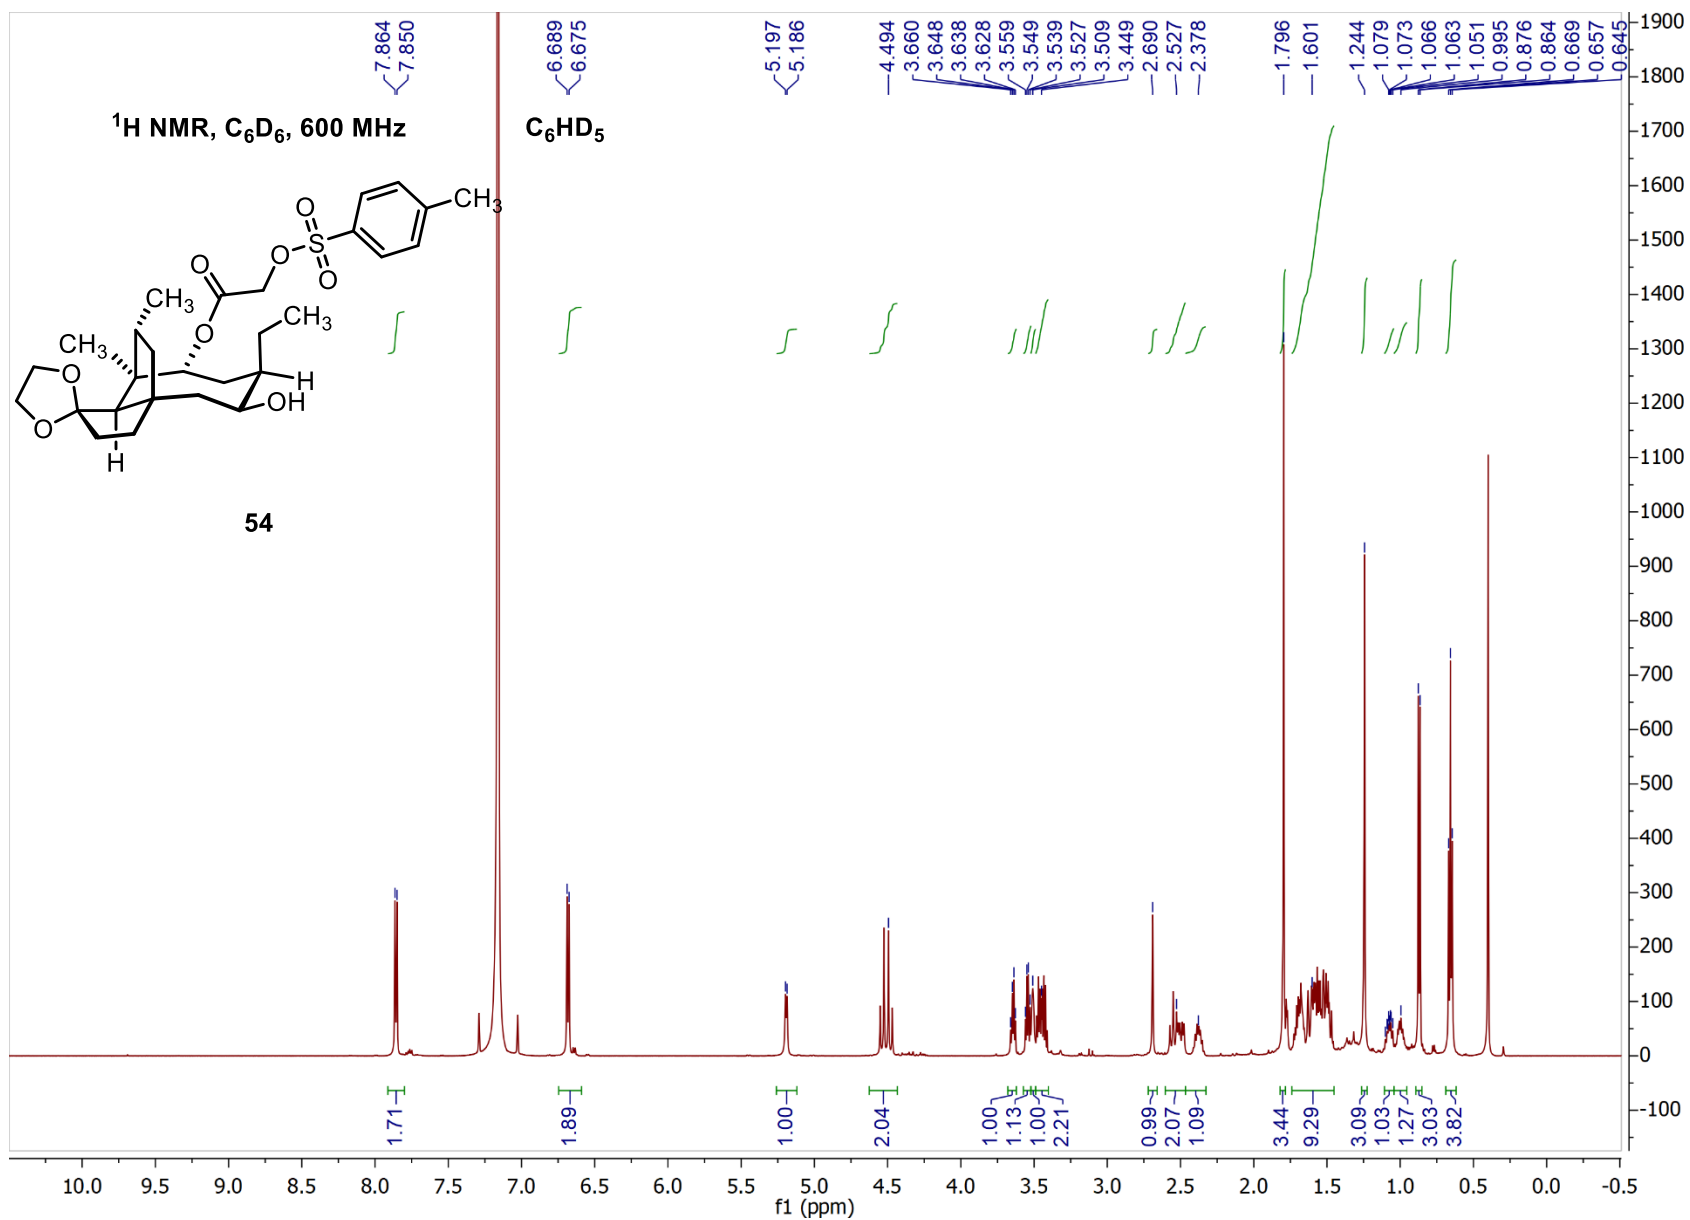



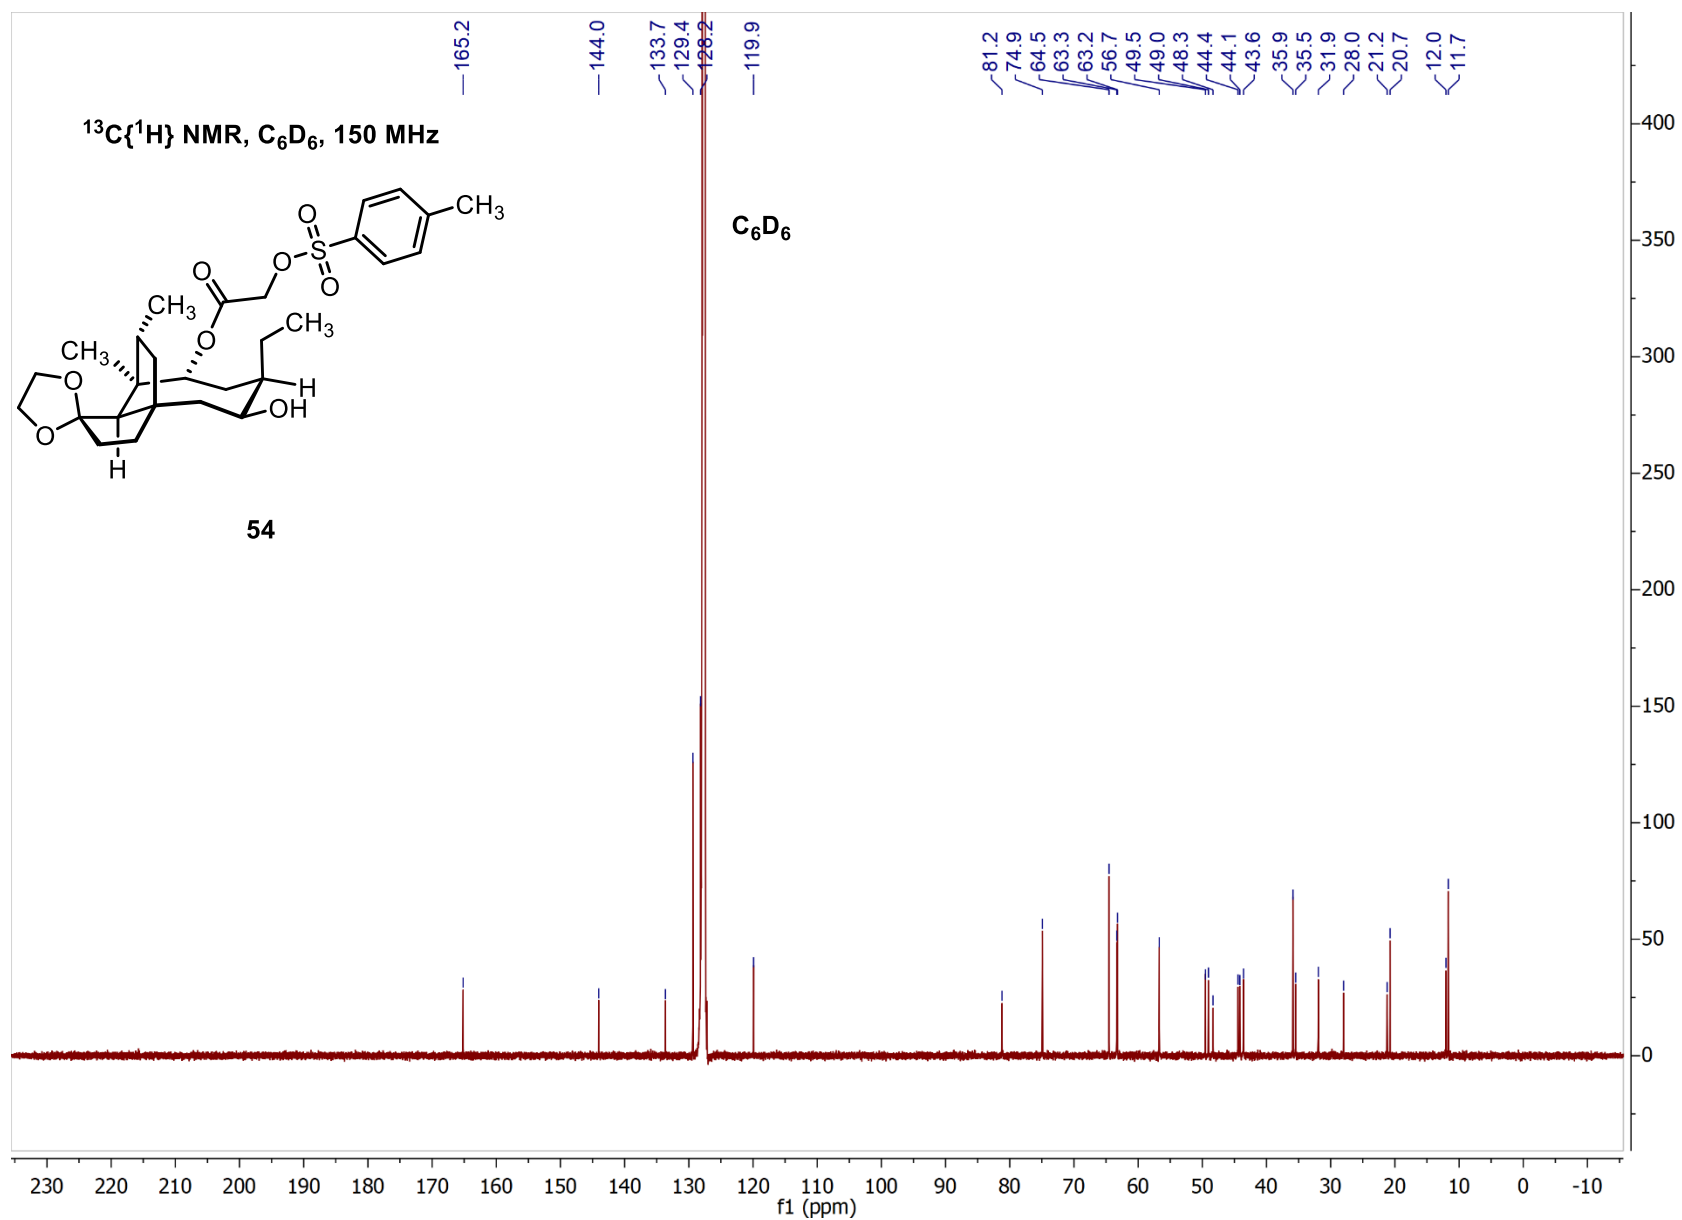

54, NOESY, C<sub>6</sub>D<sub>6</sub>, 500 MHz

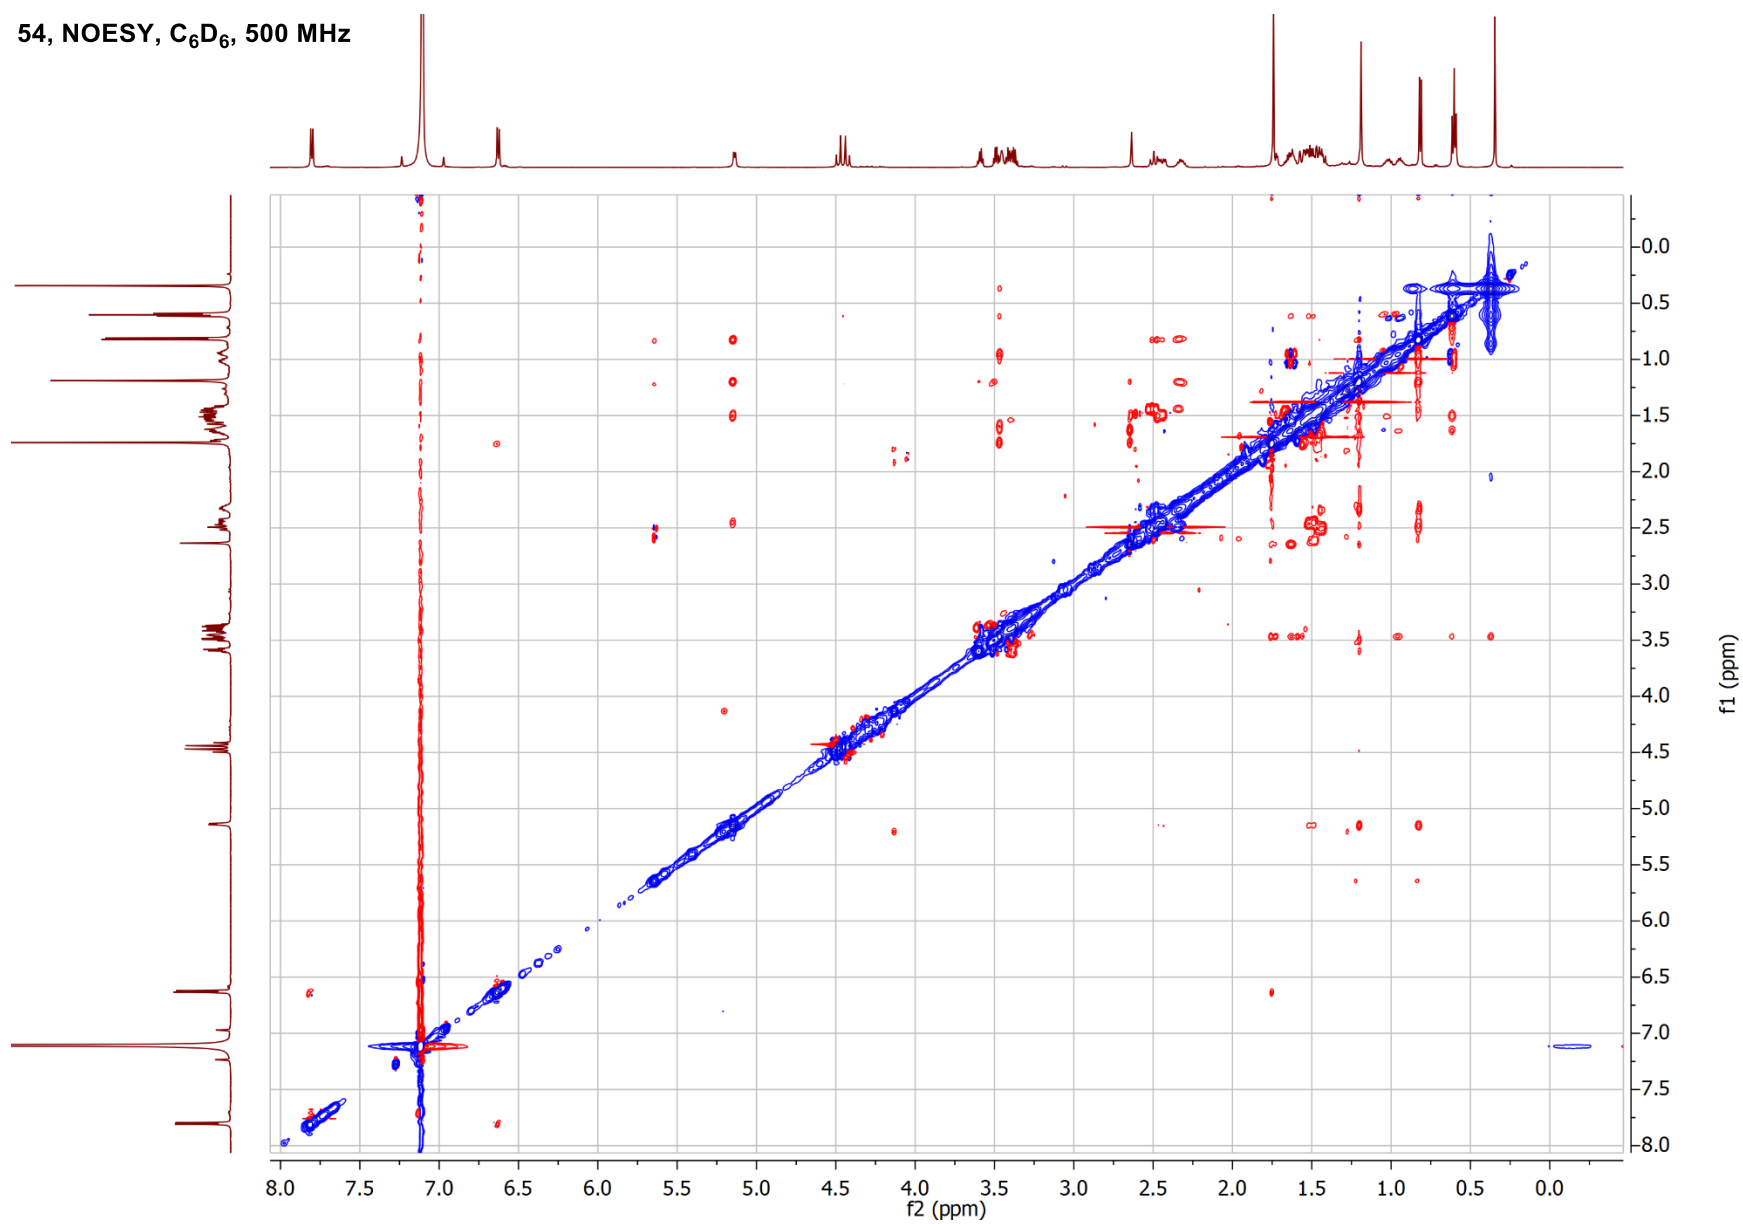

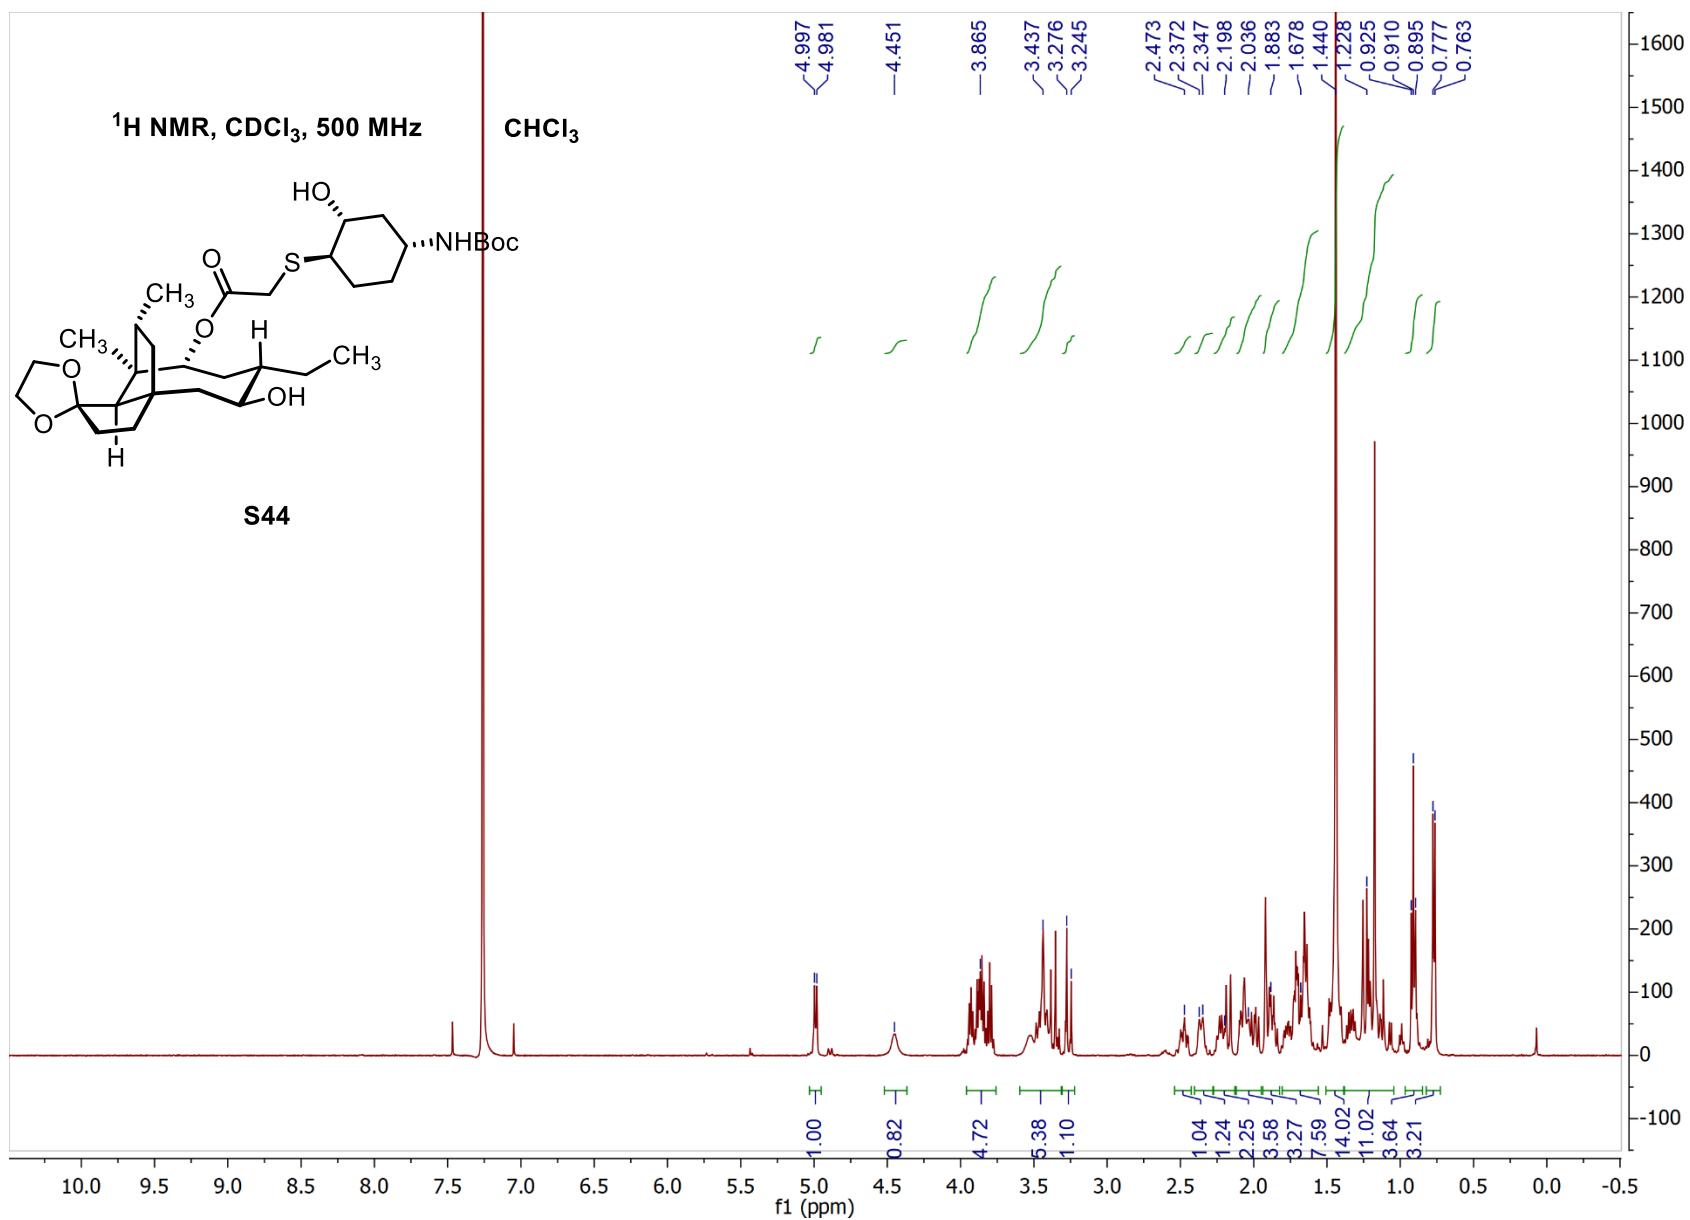

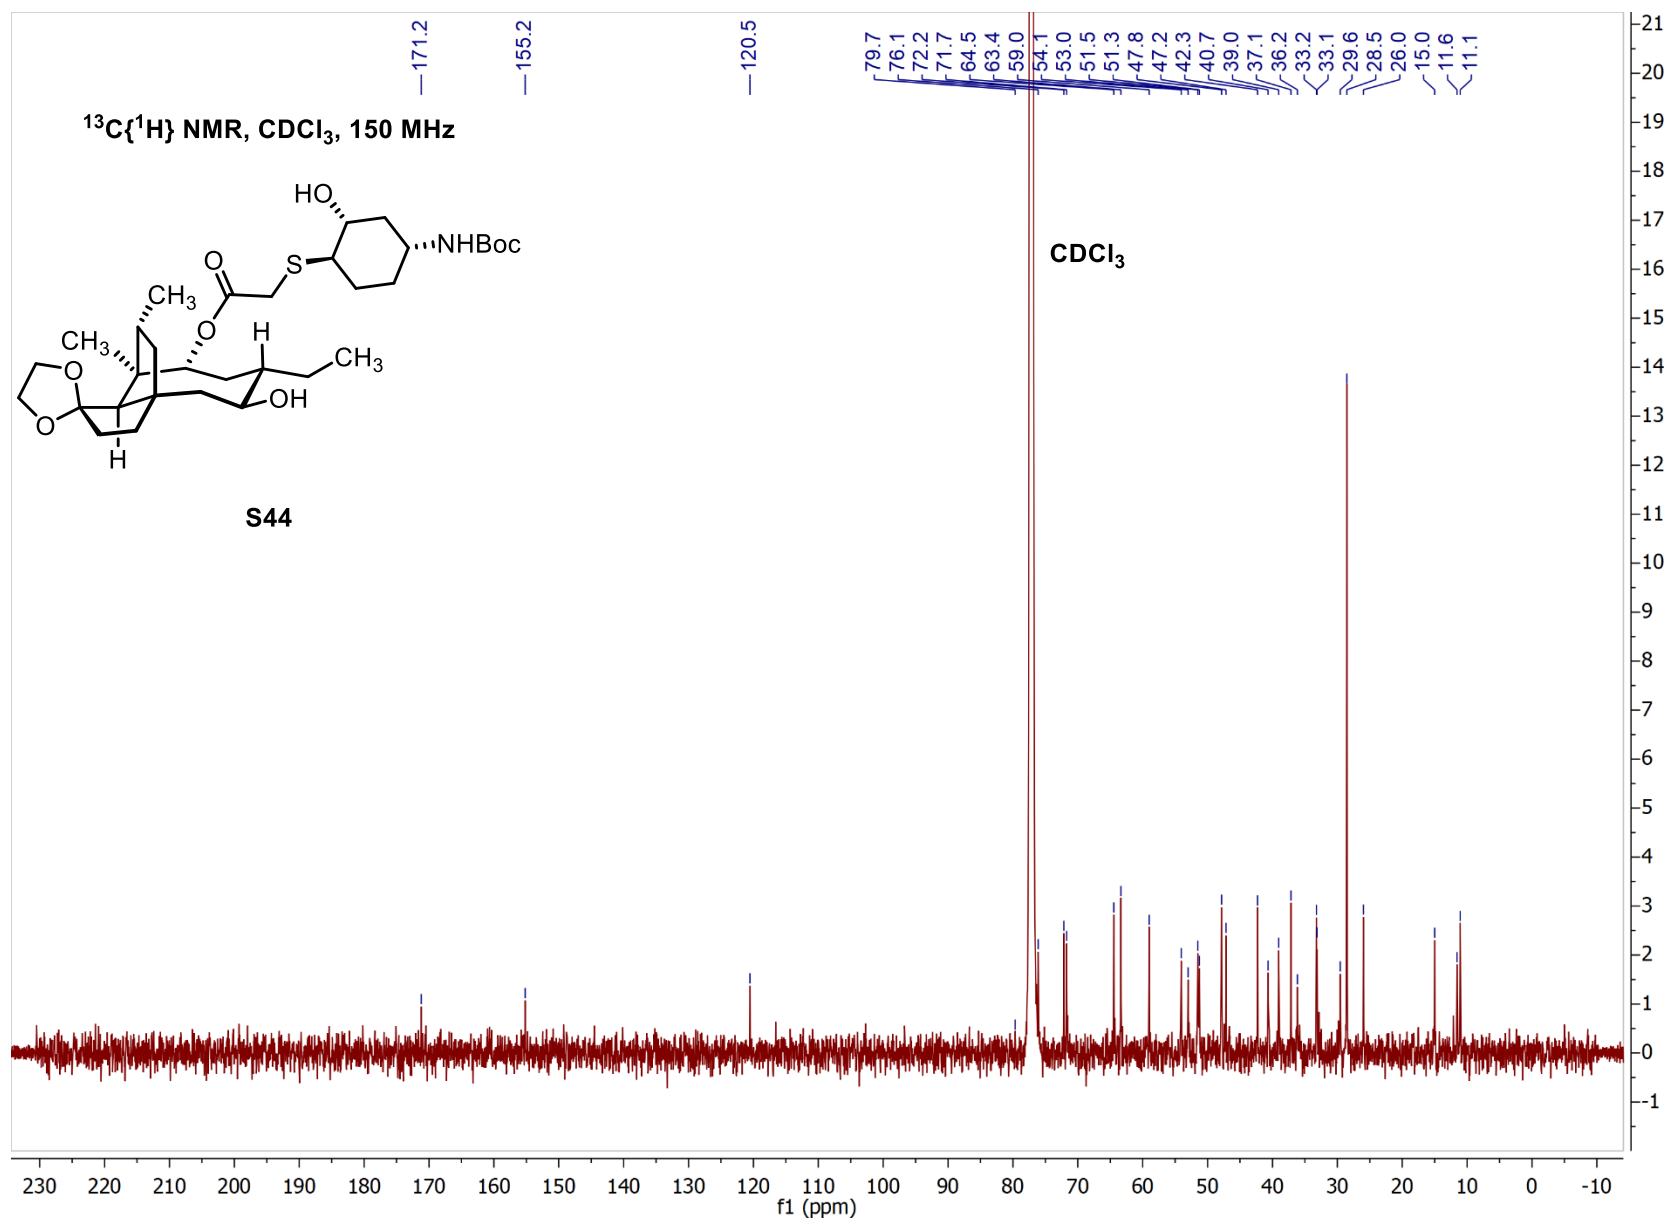

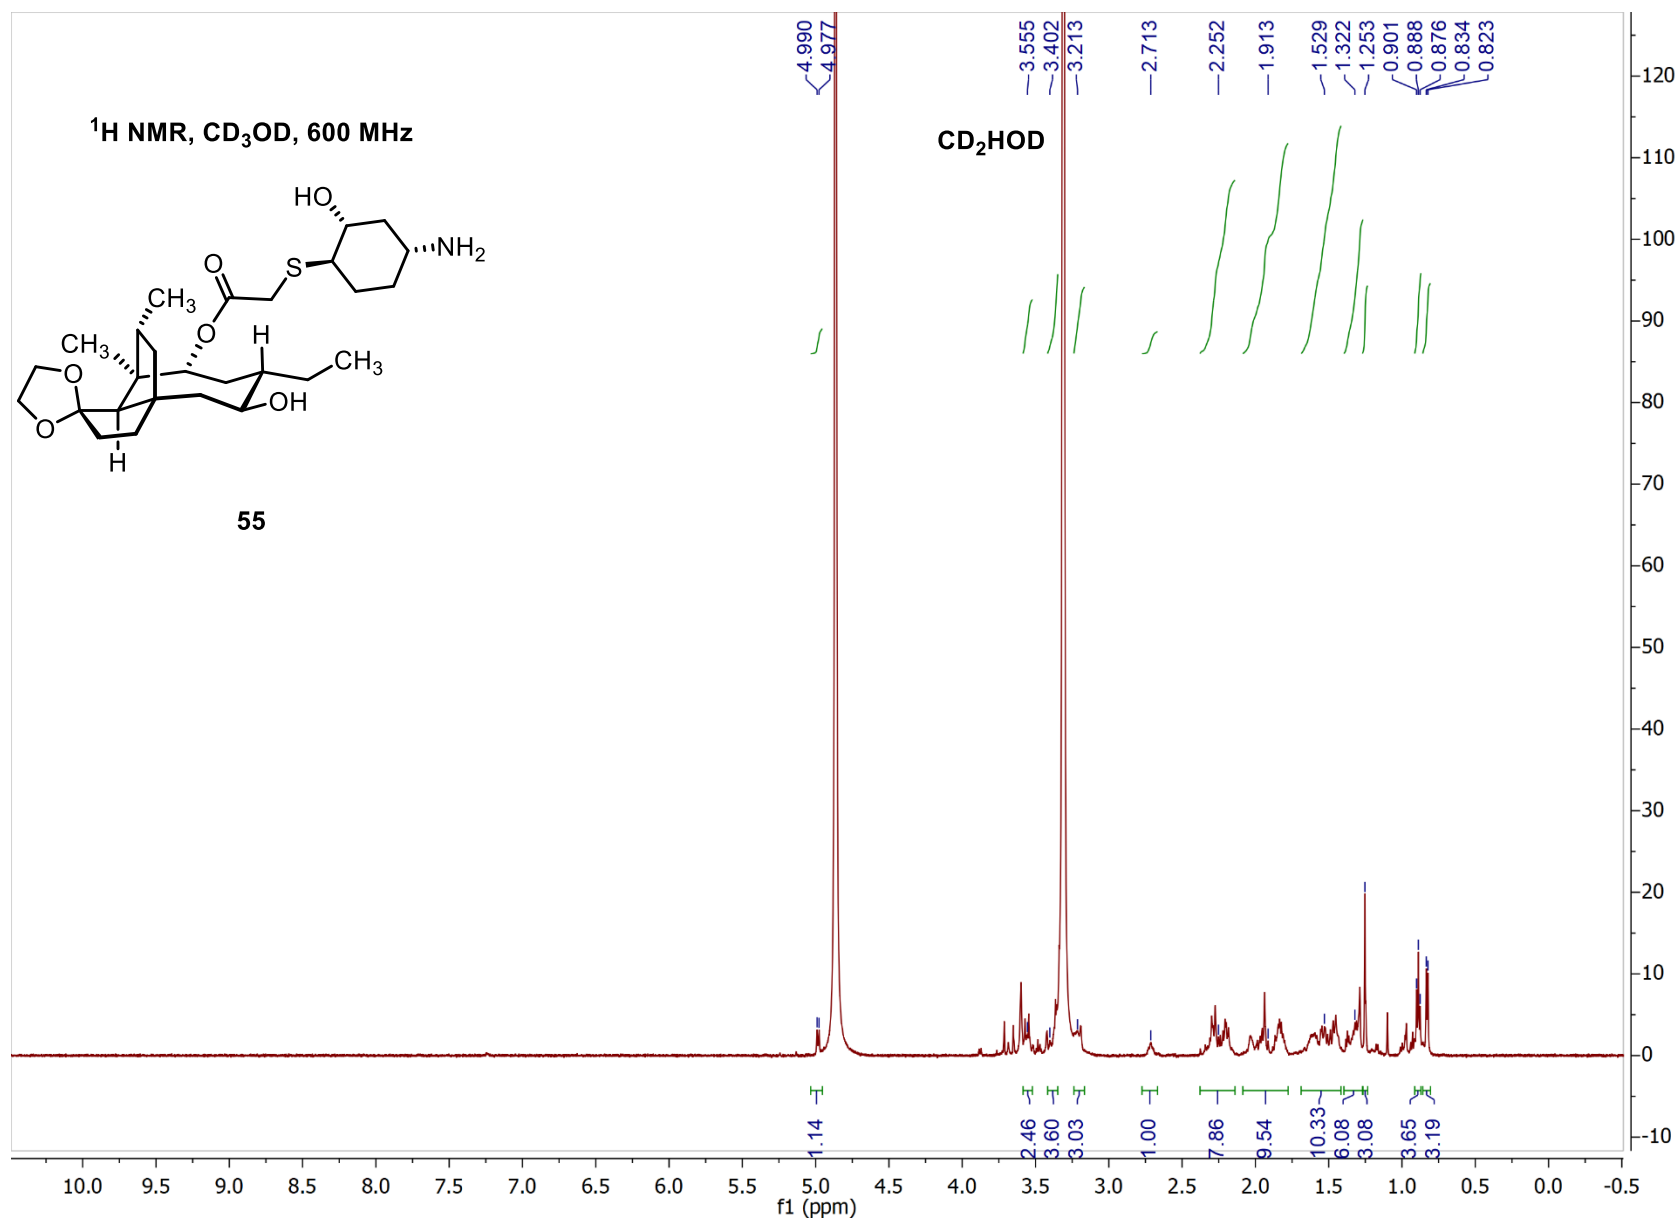

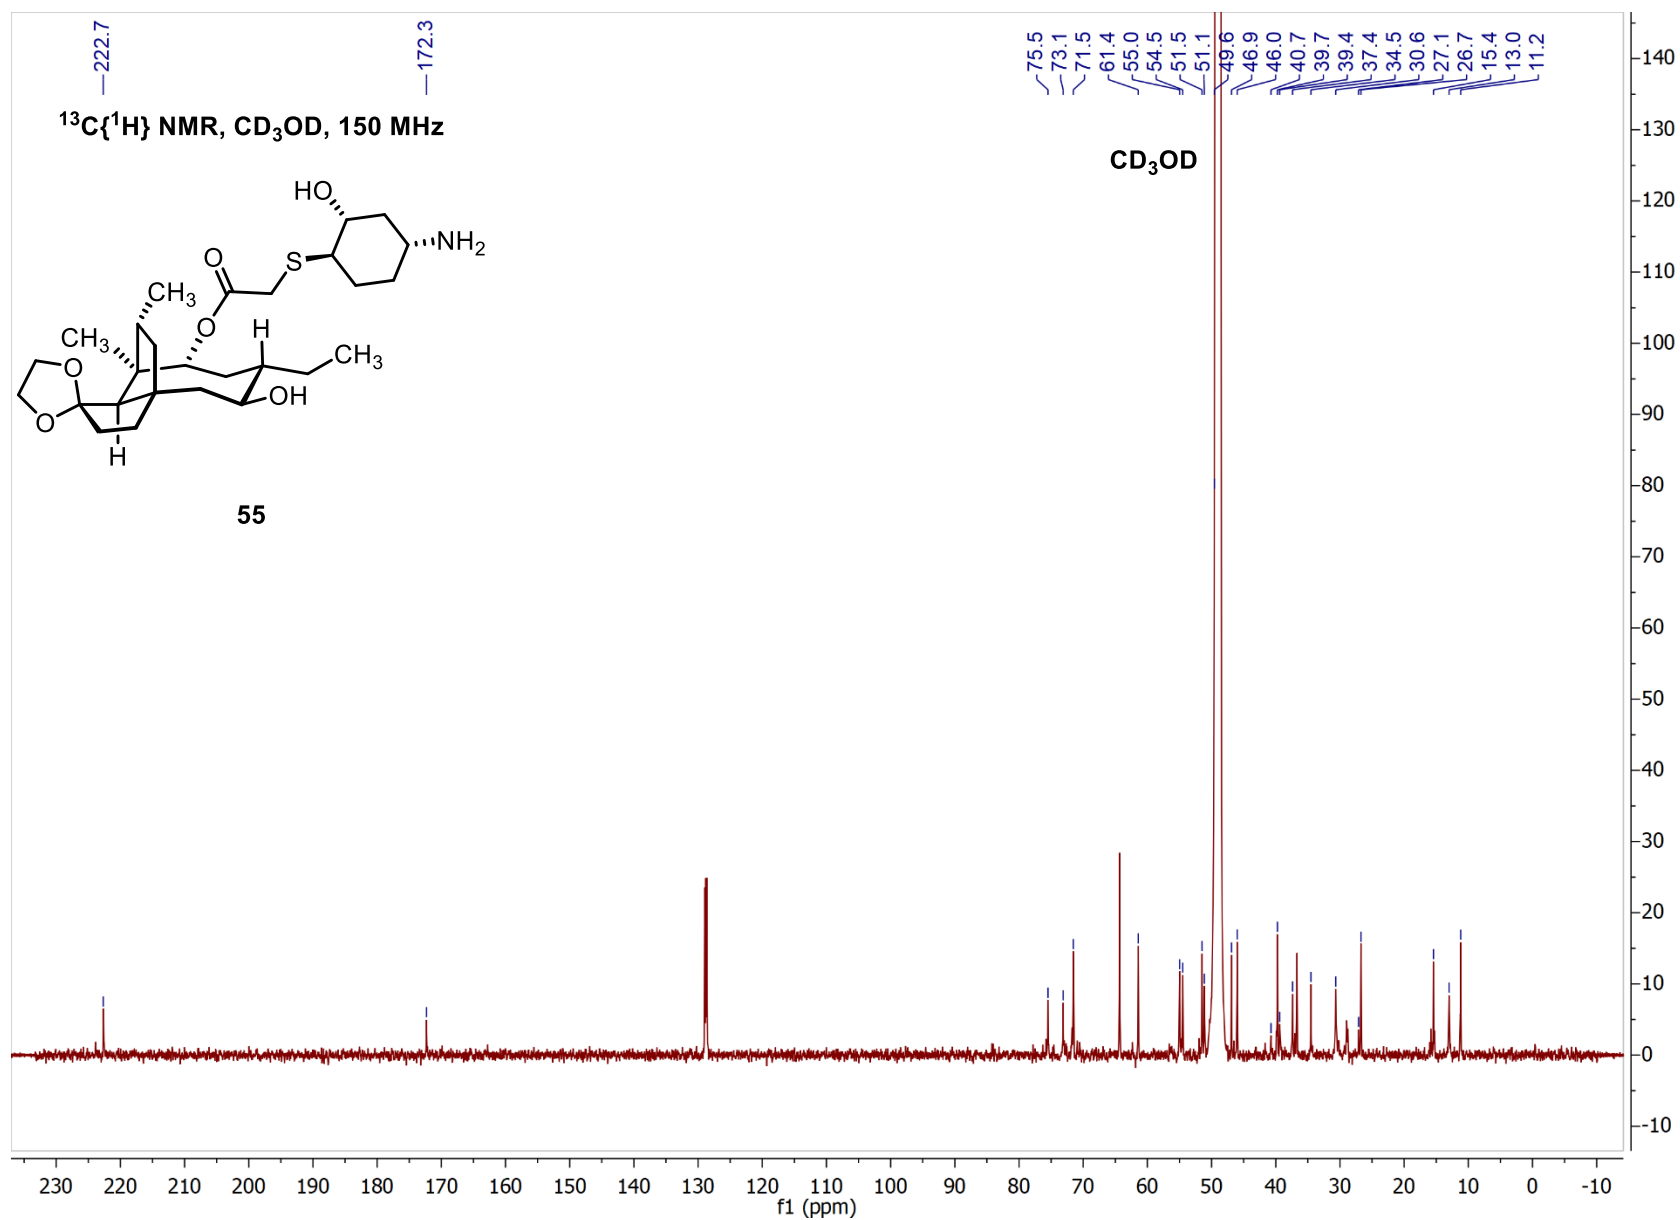

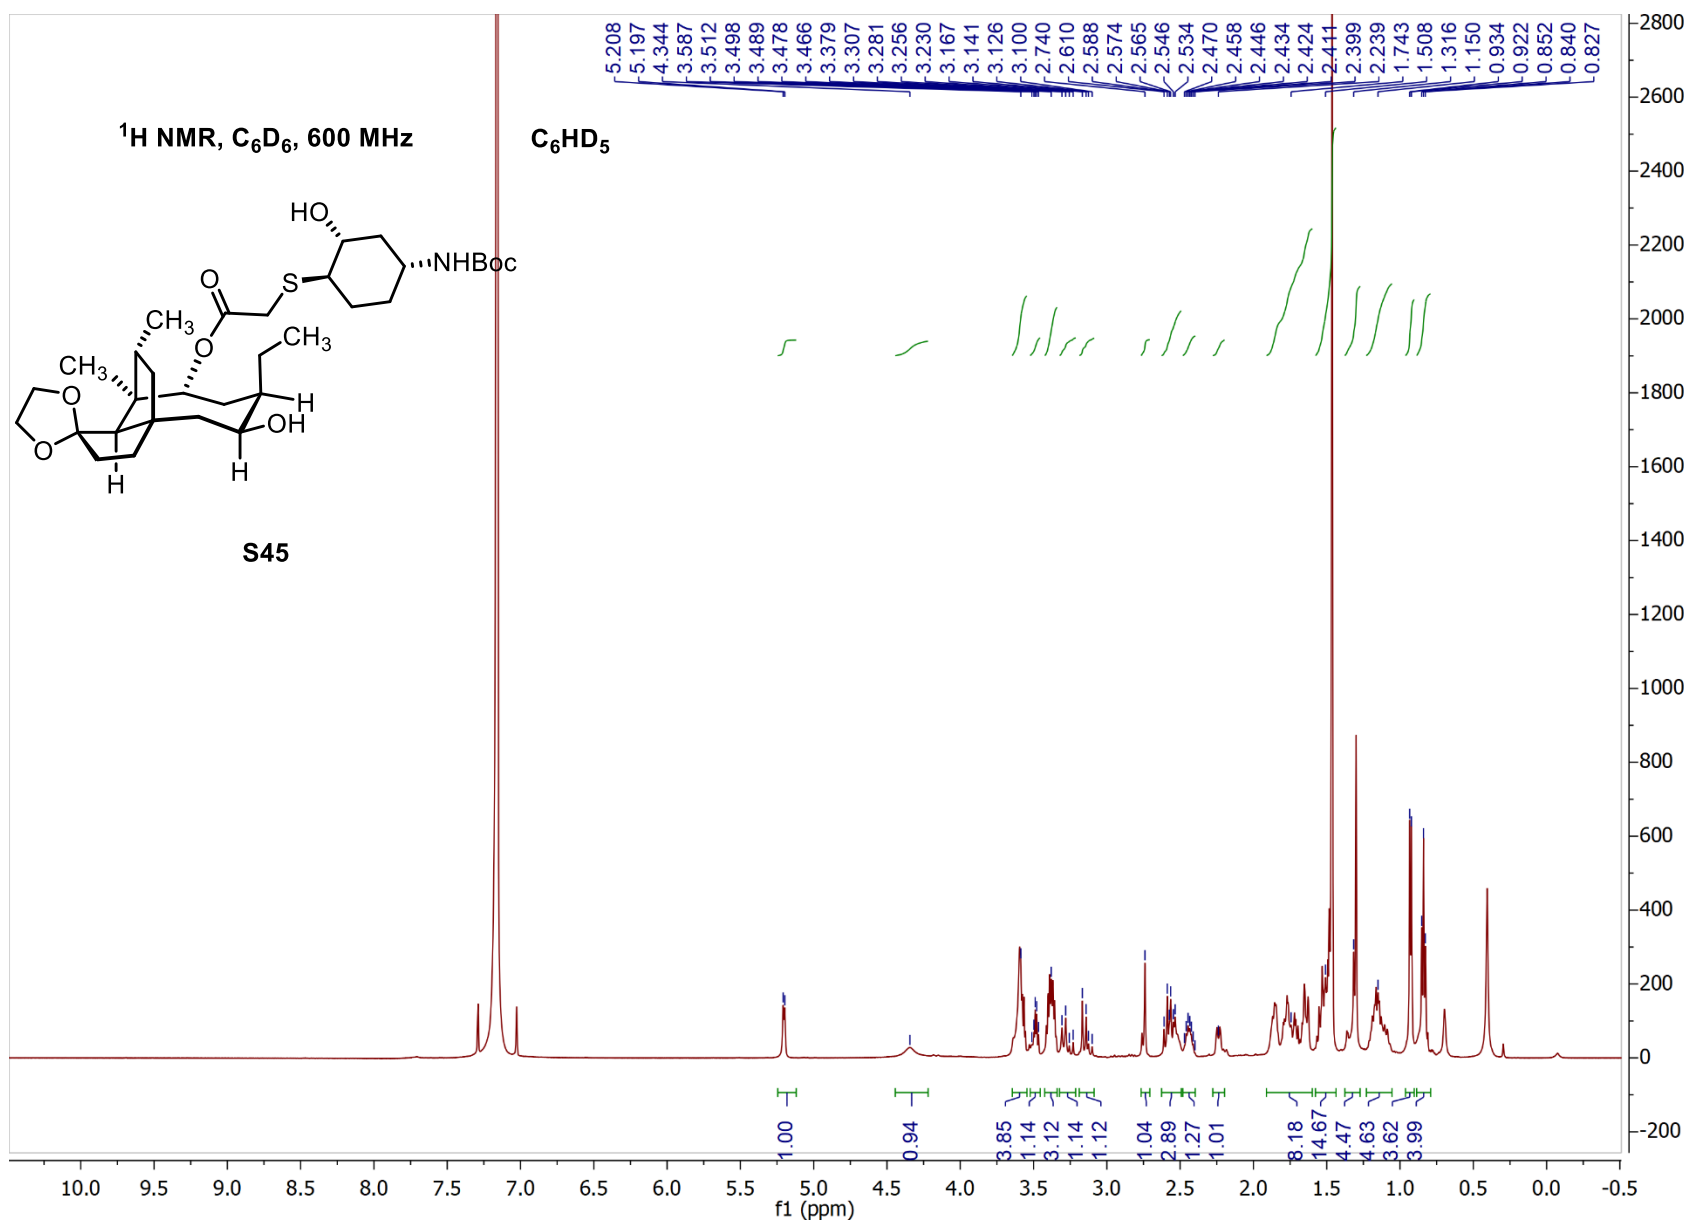

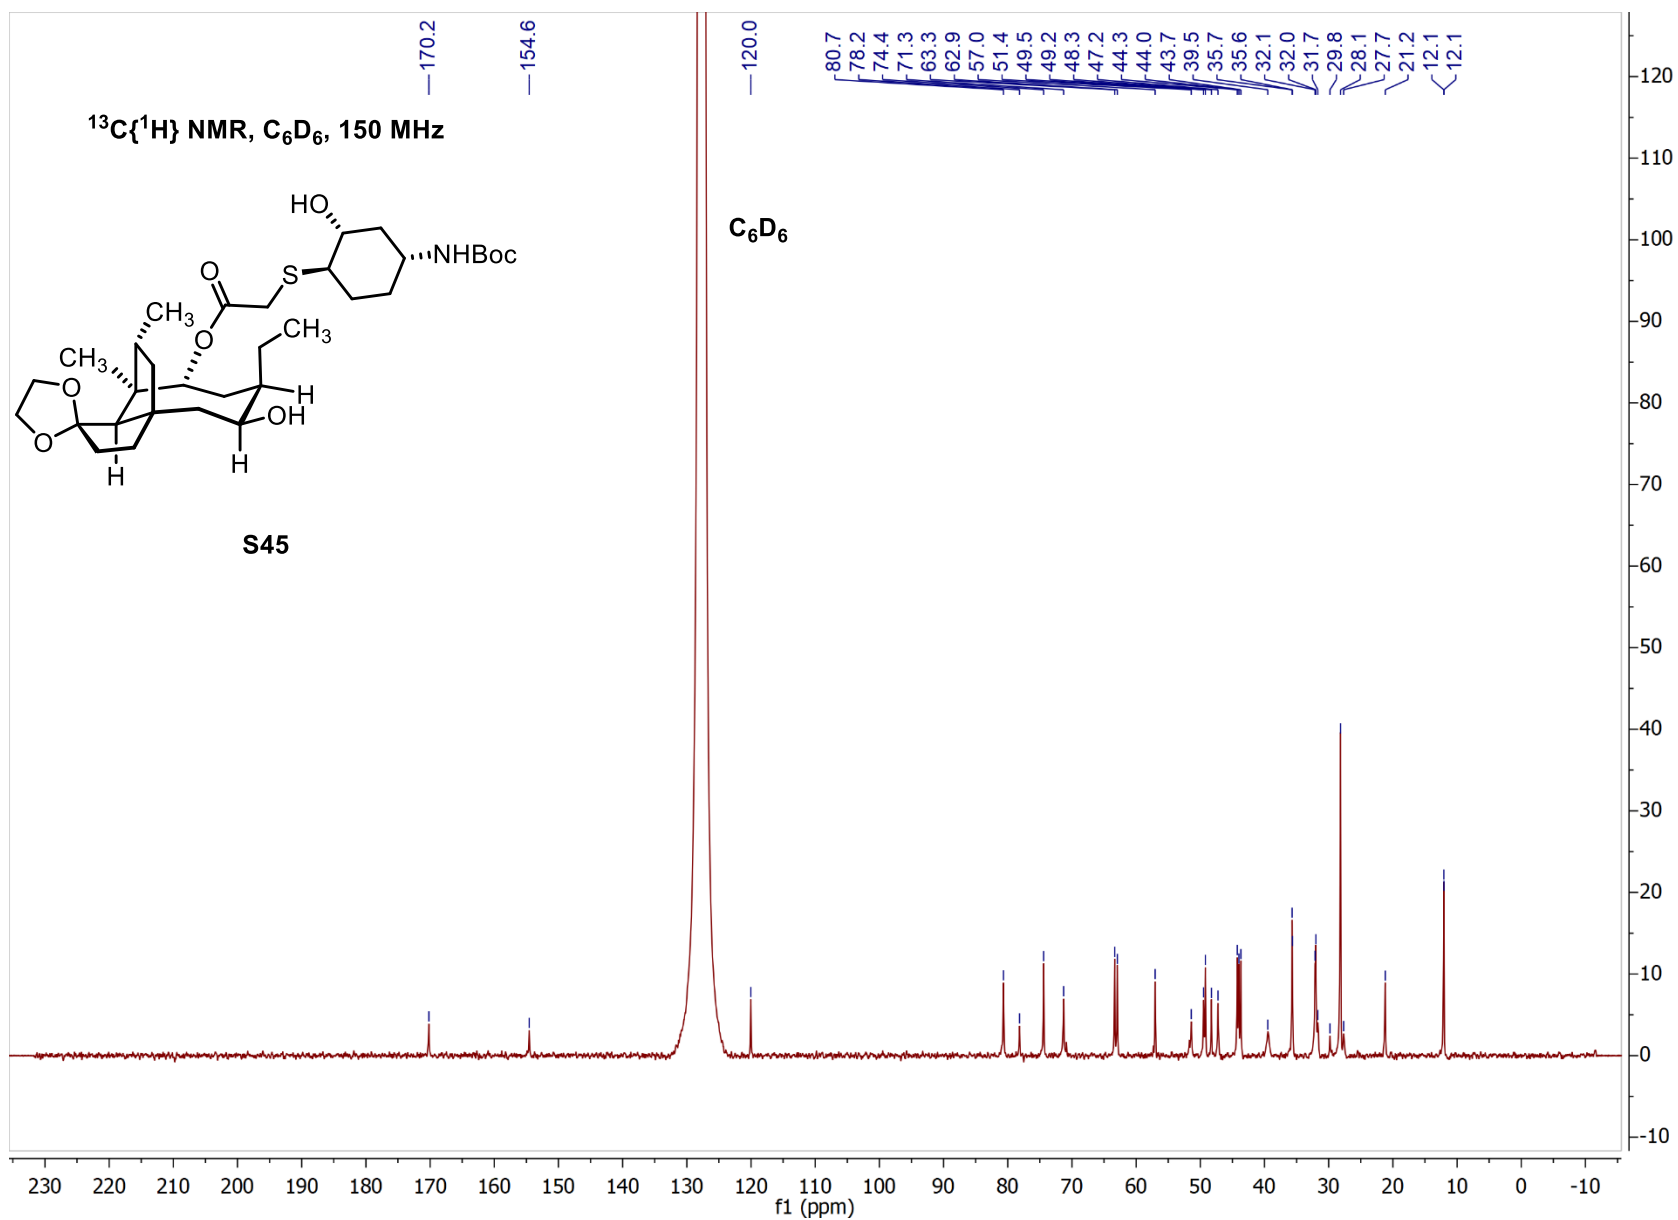



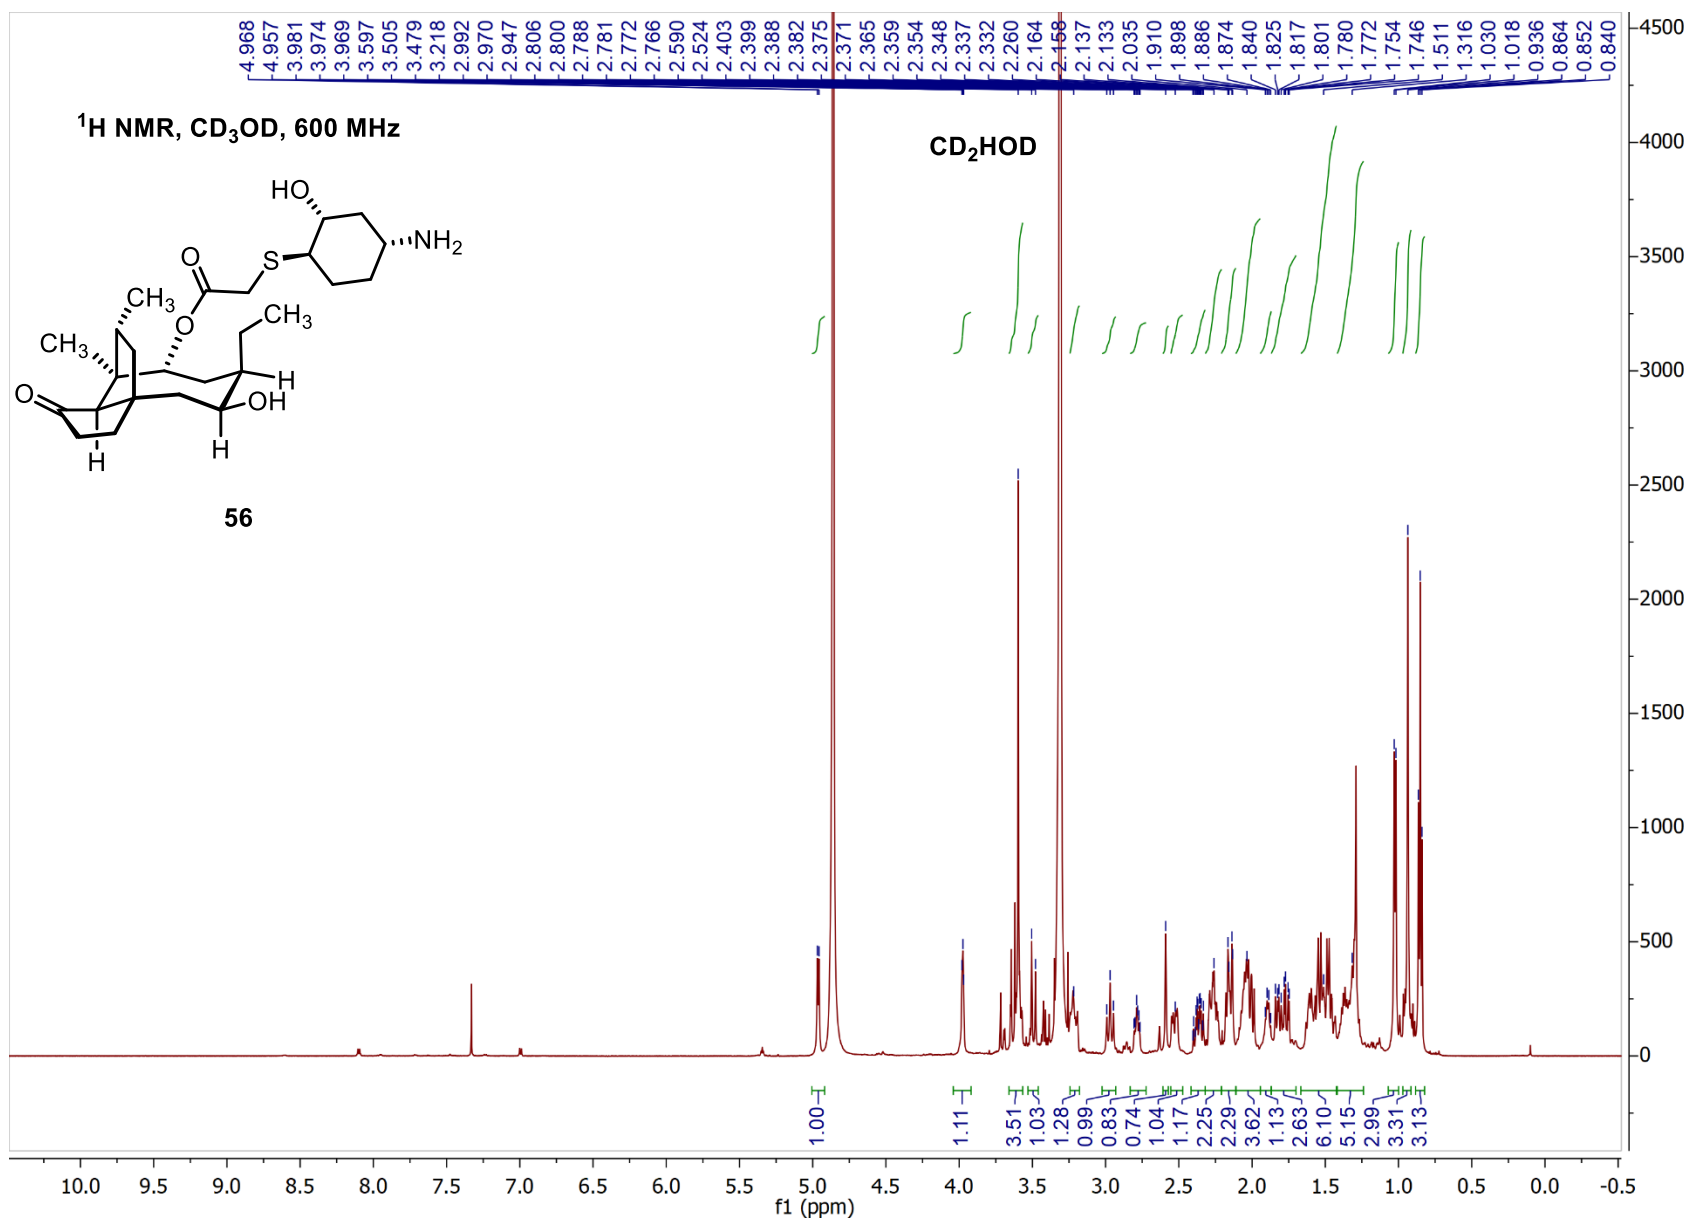

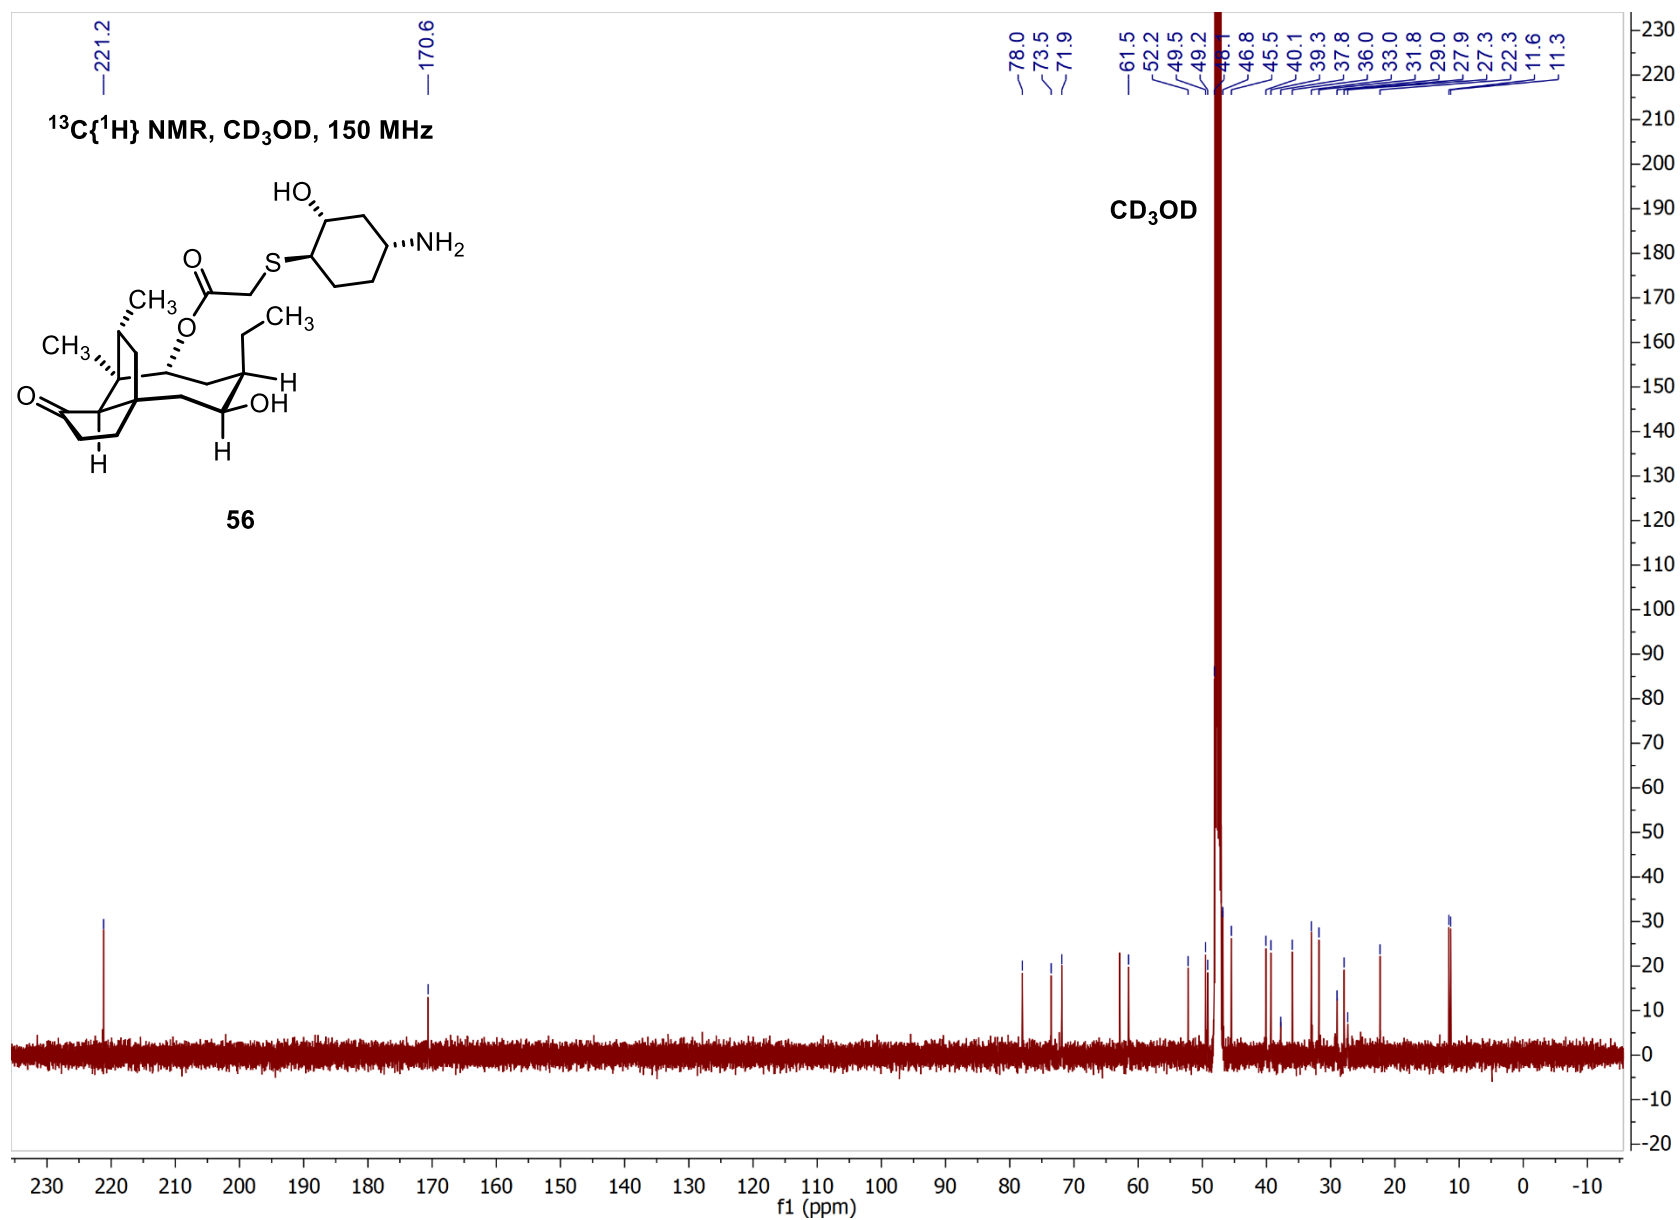

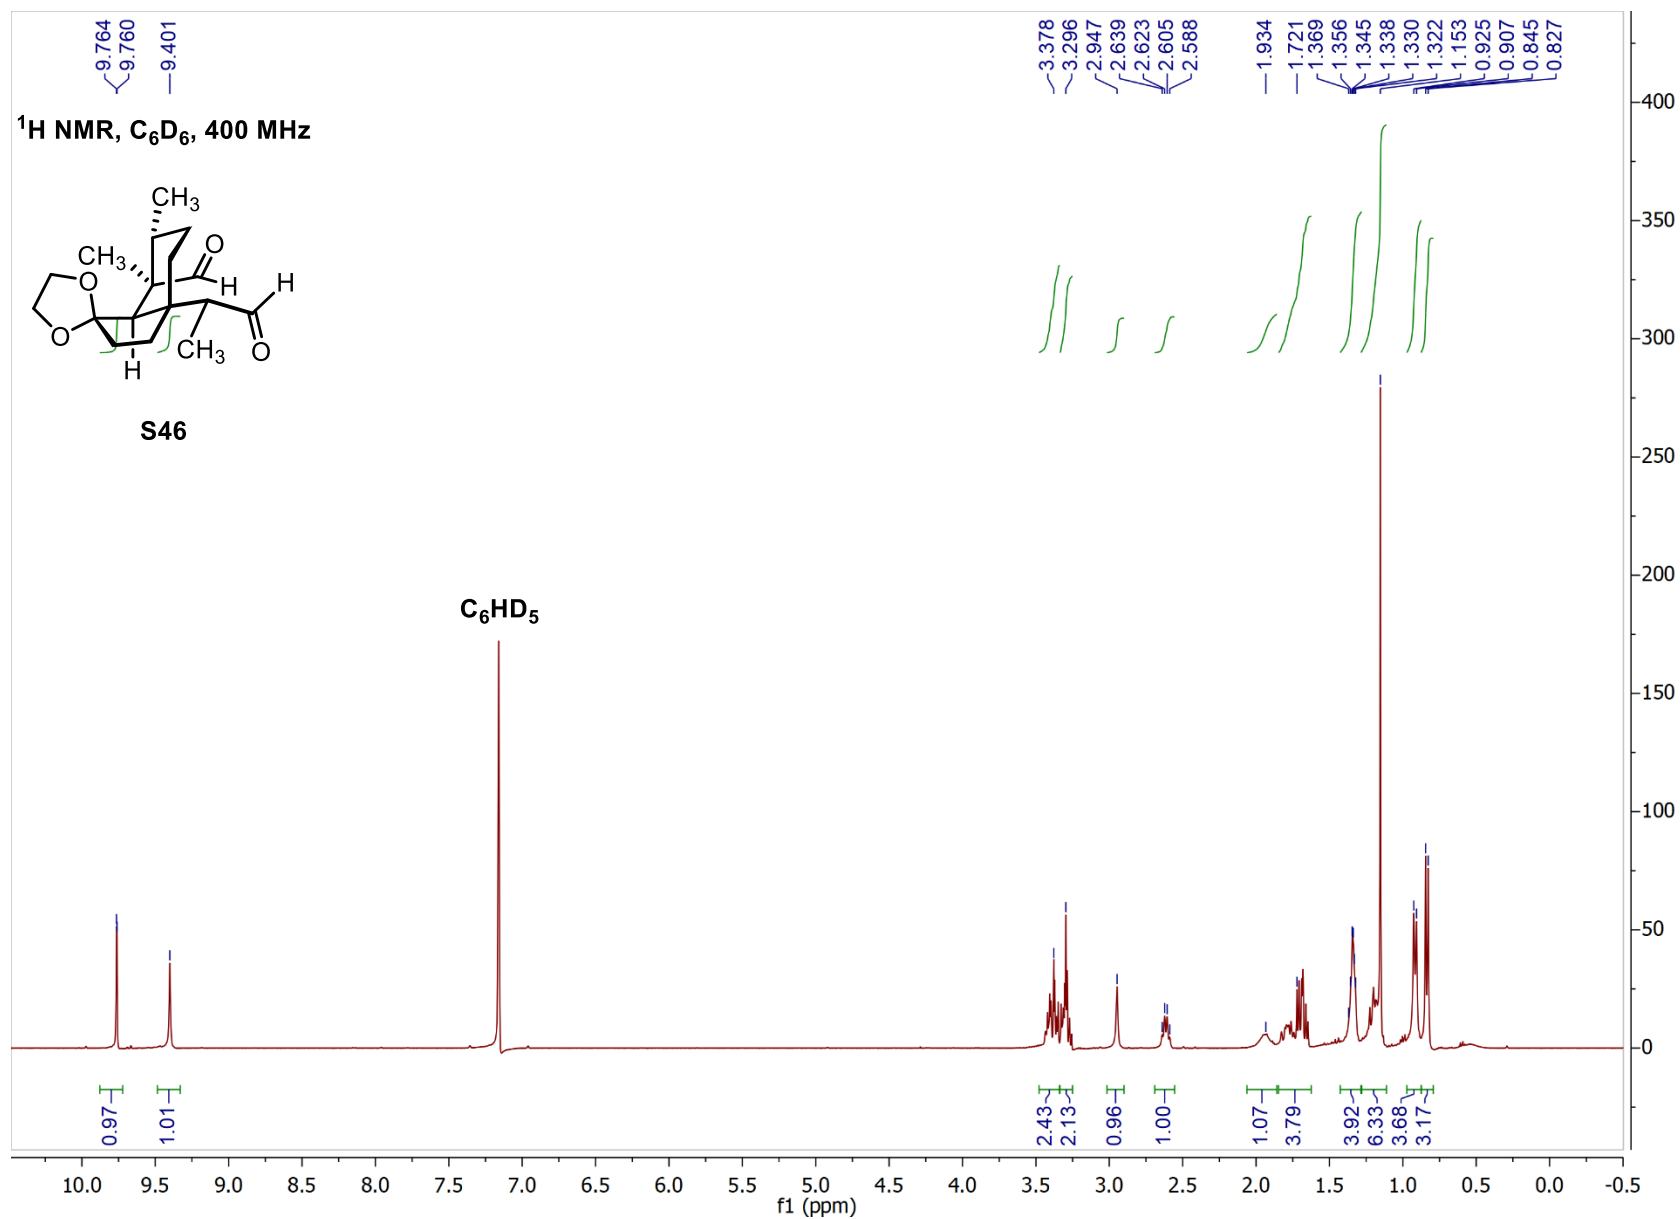

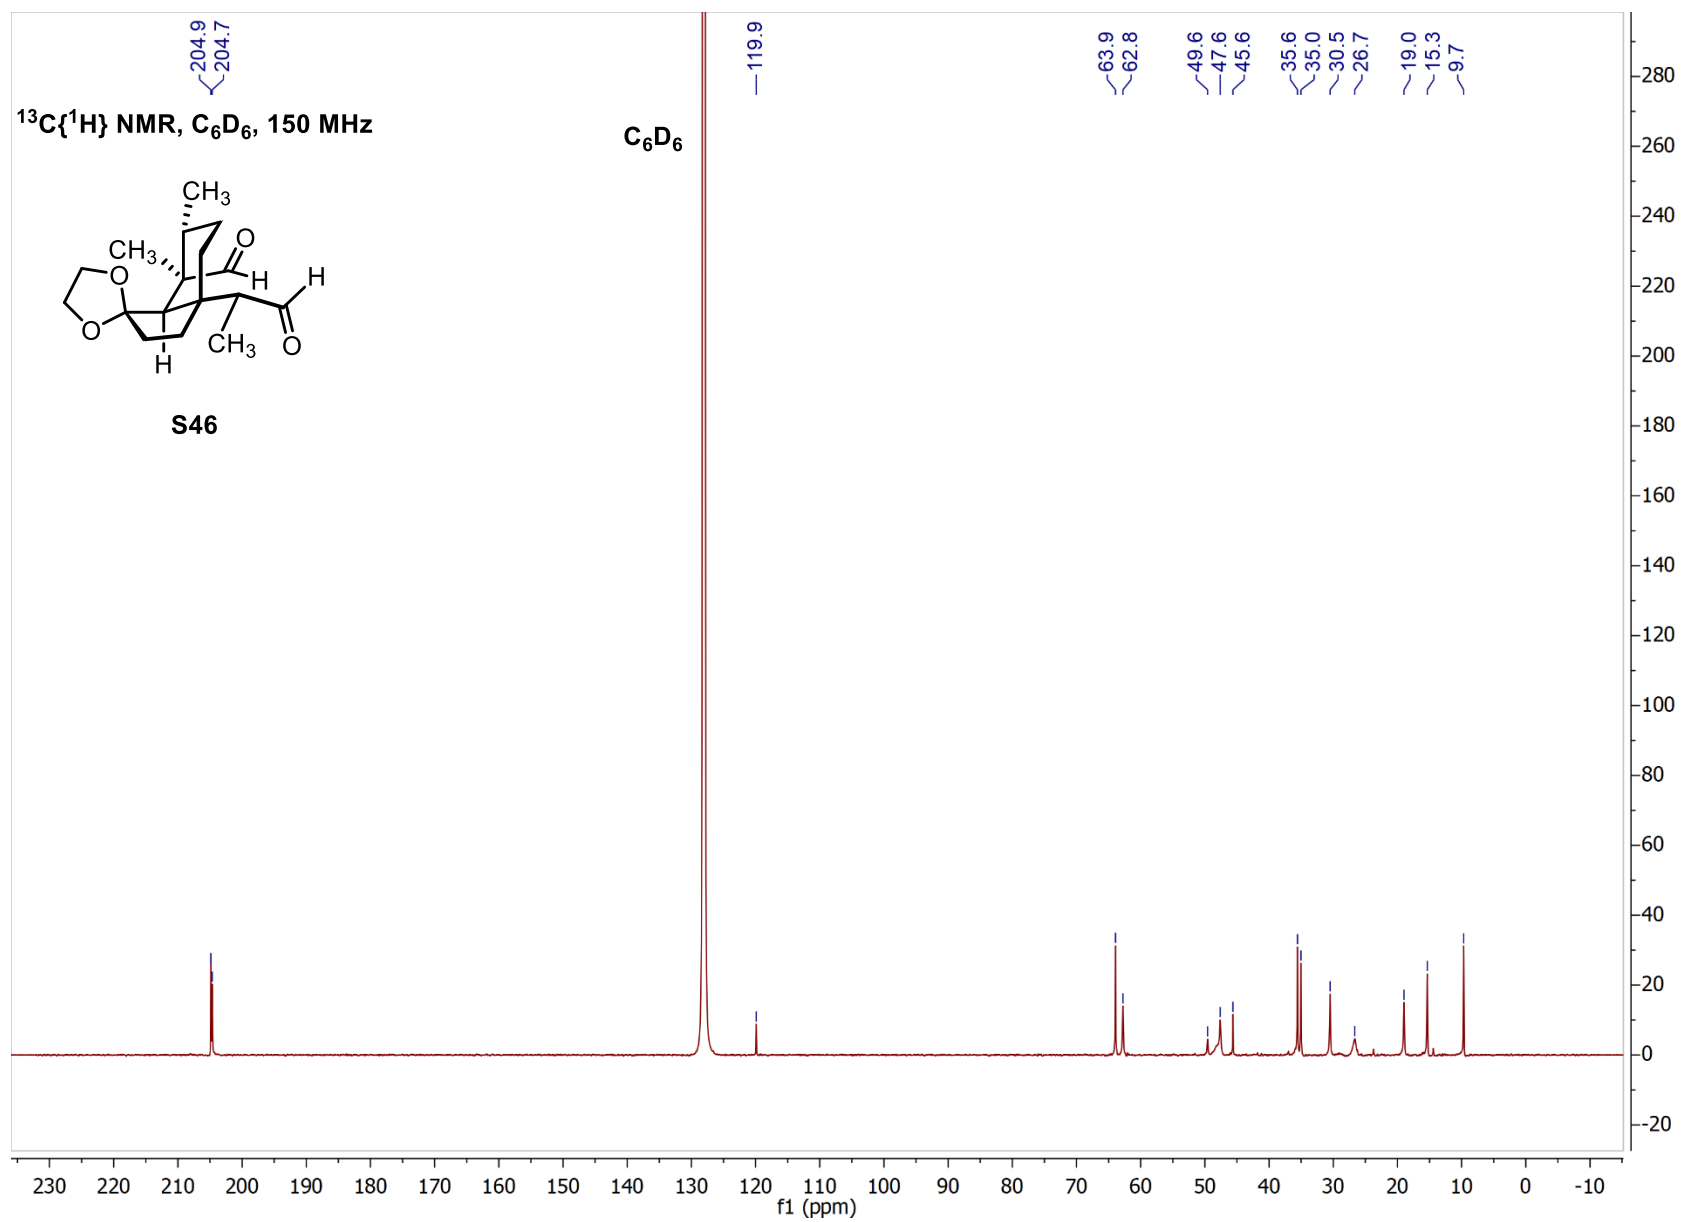

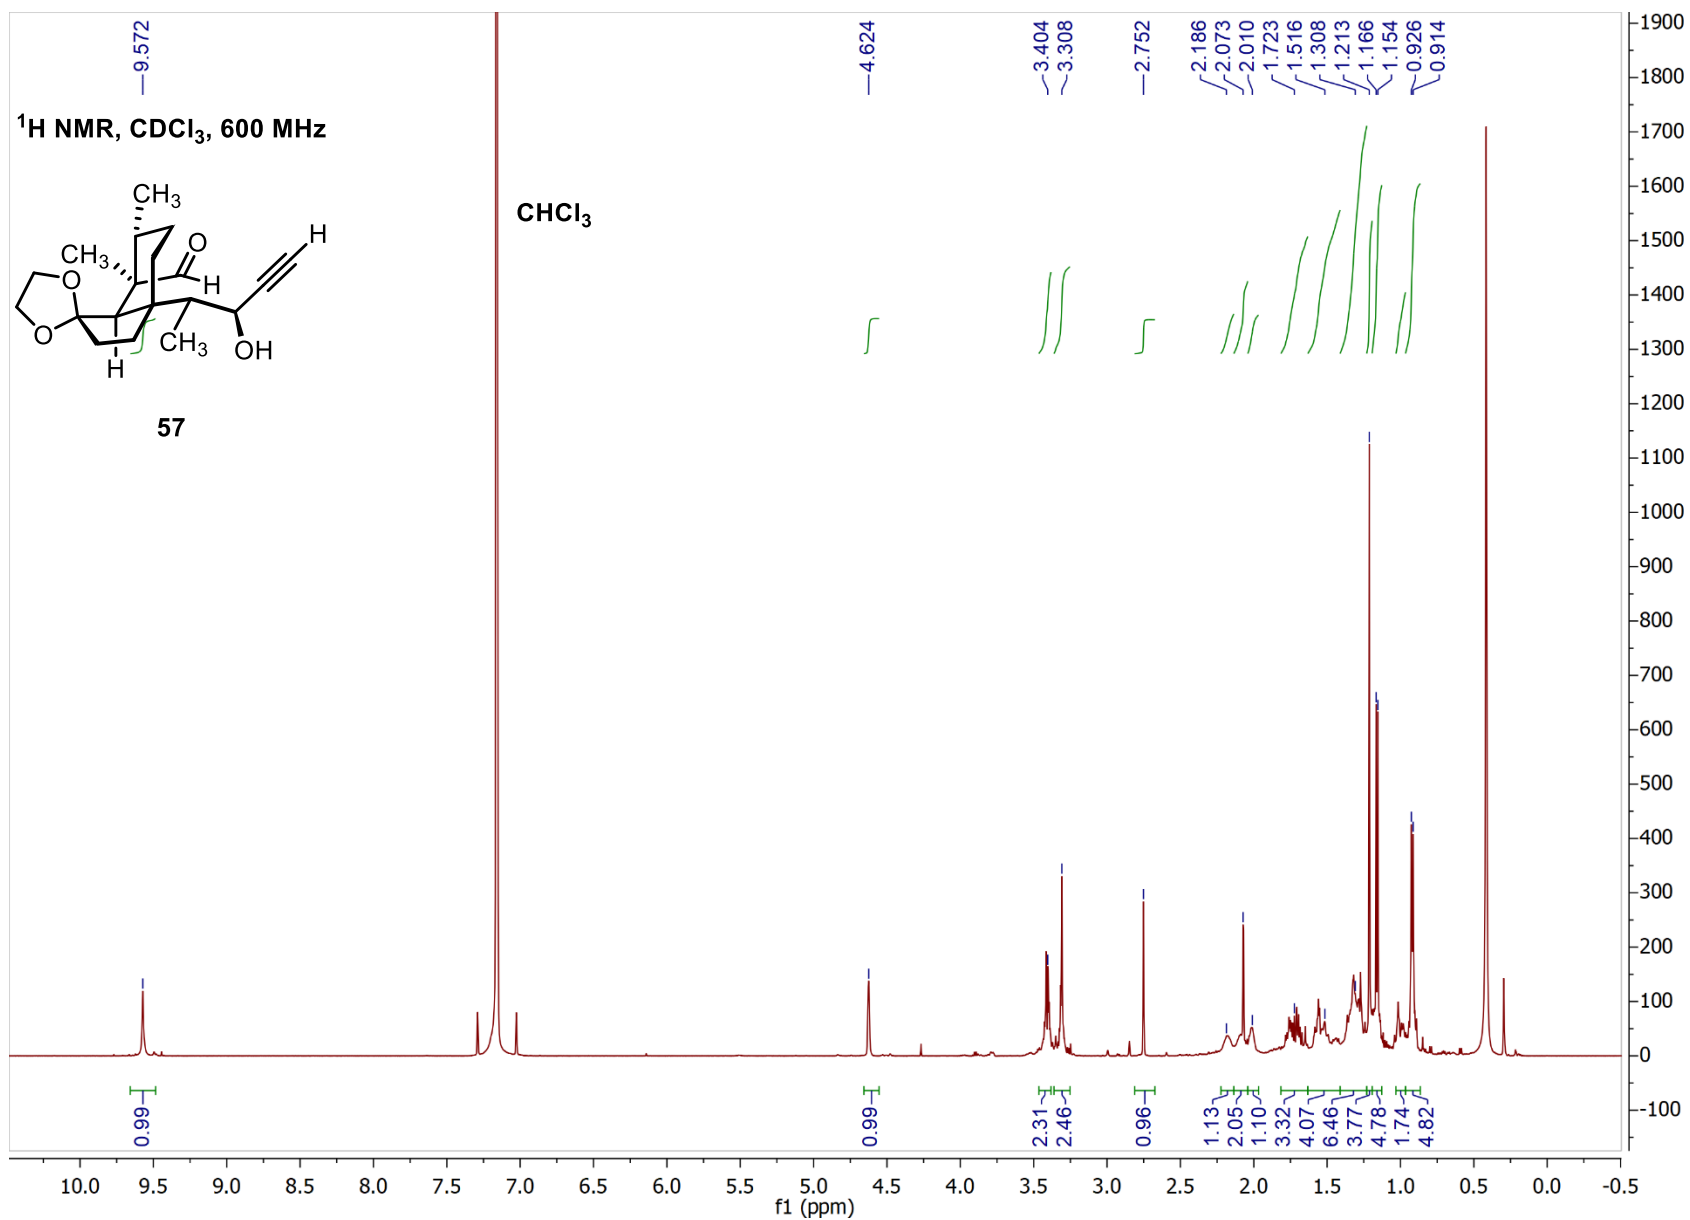

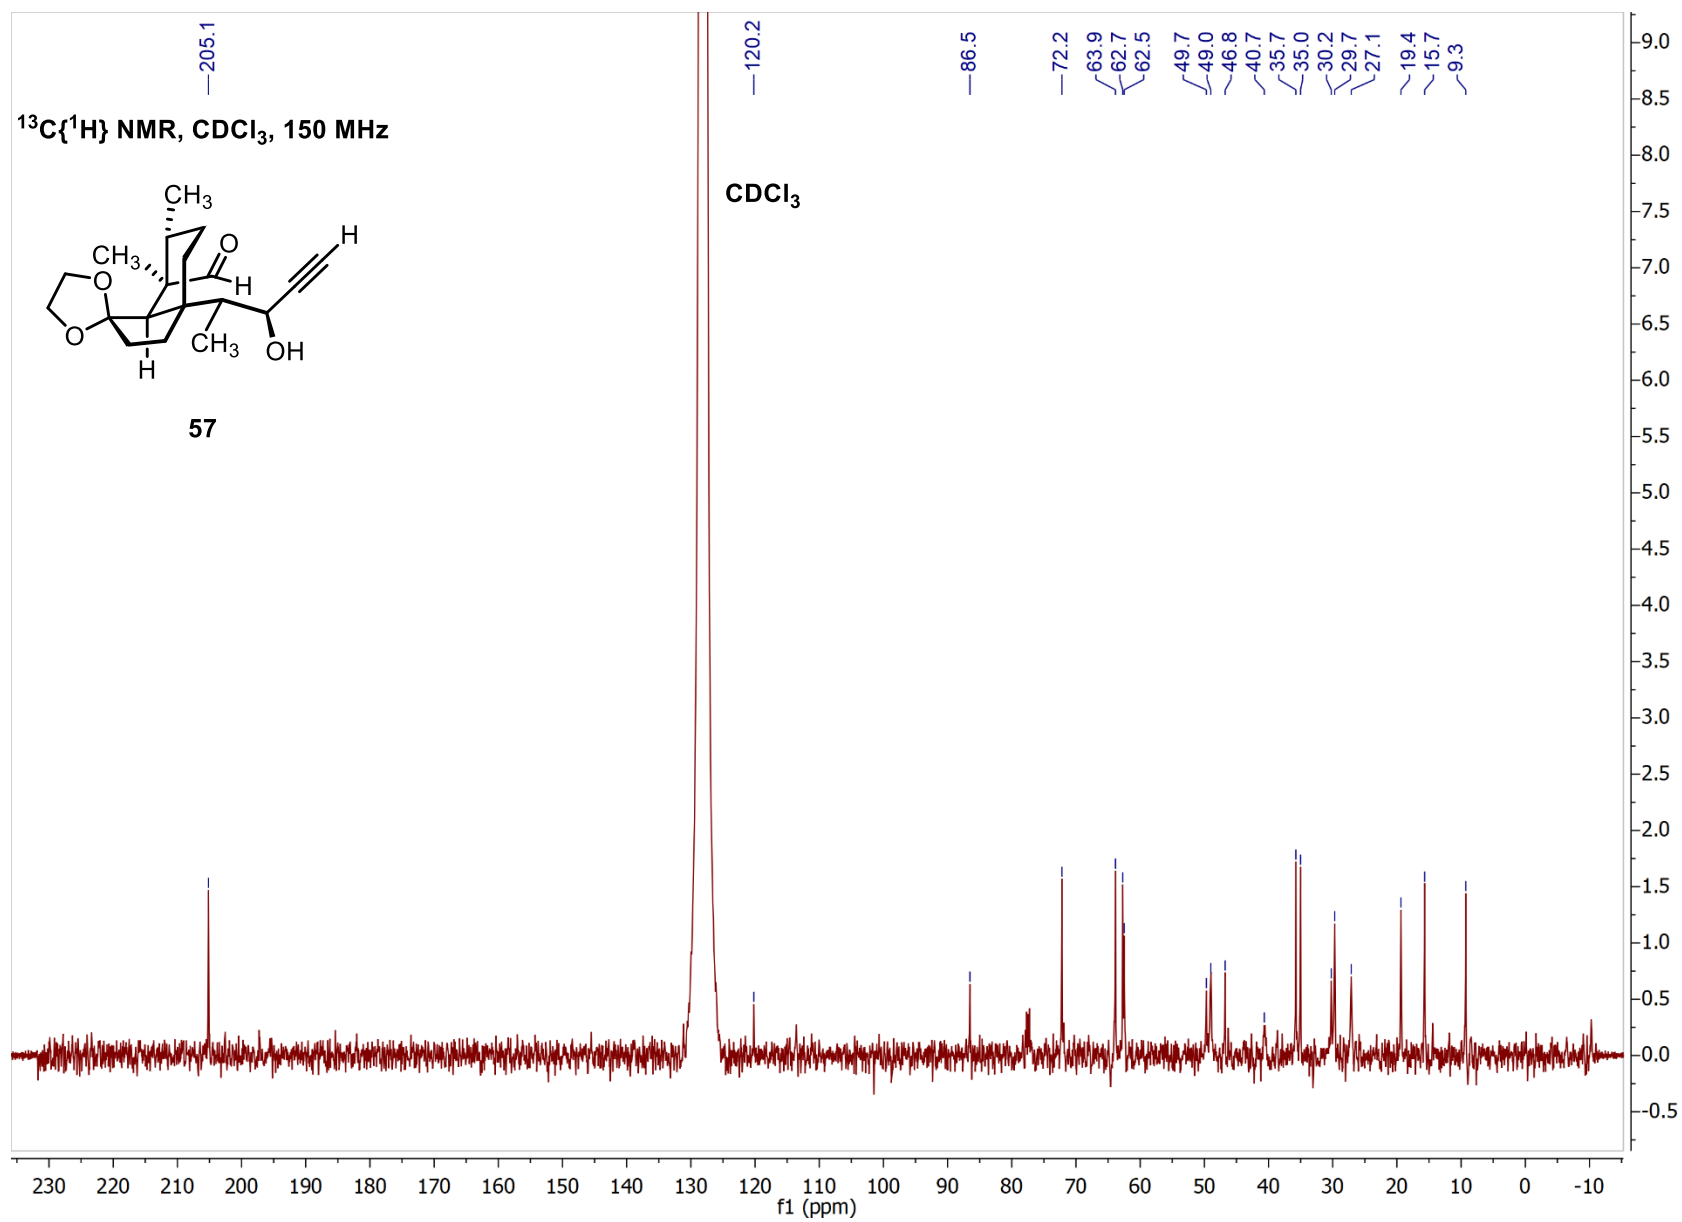

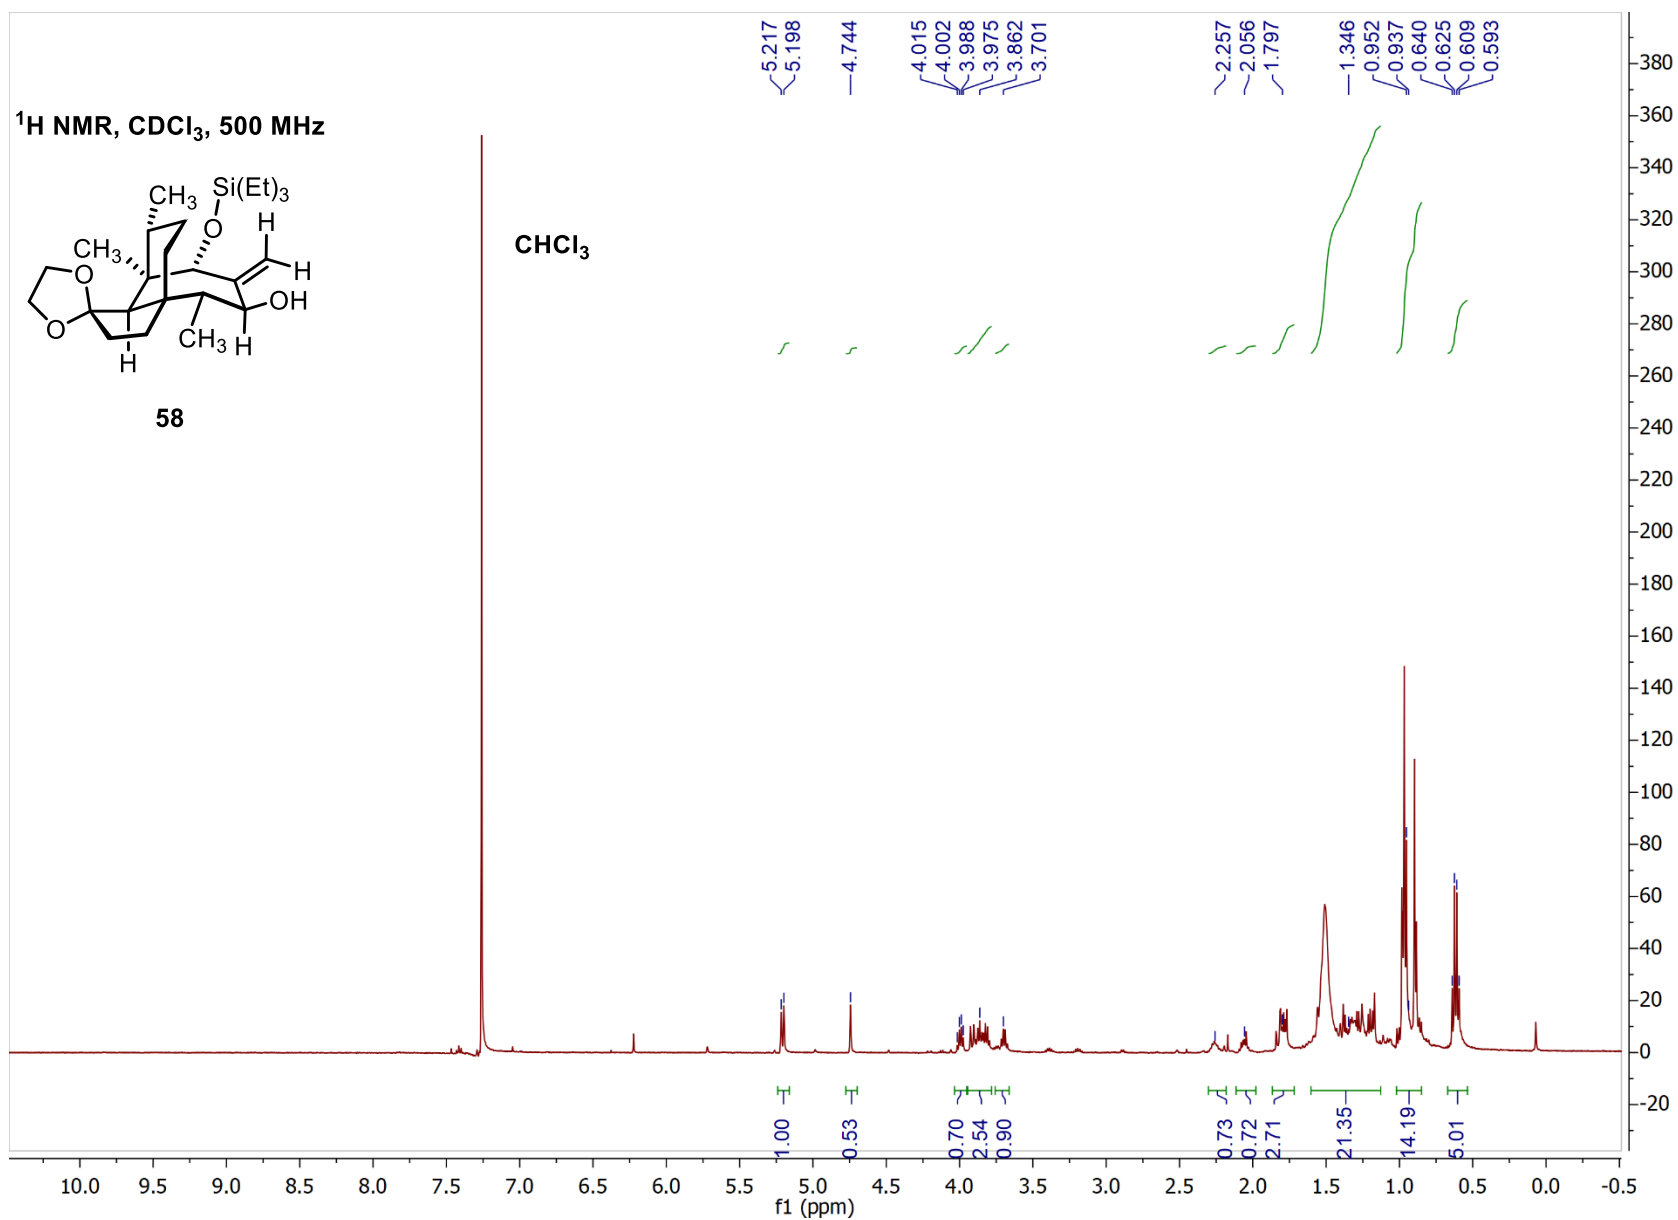

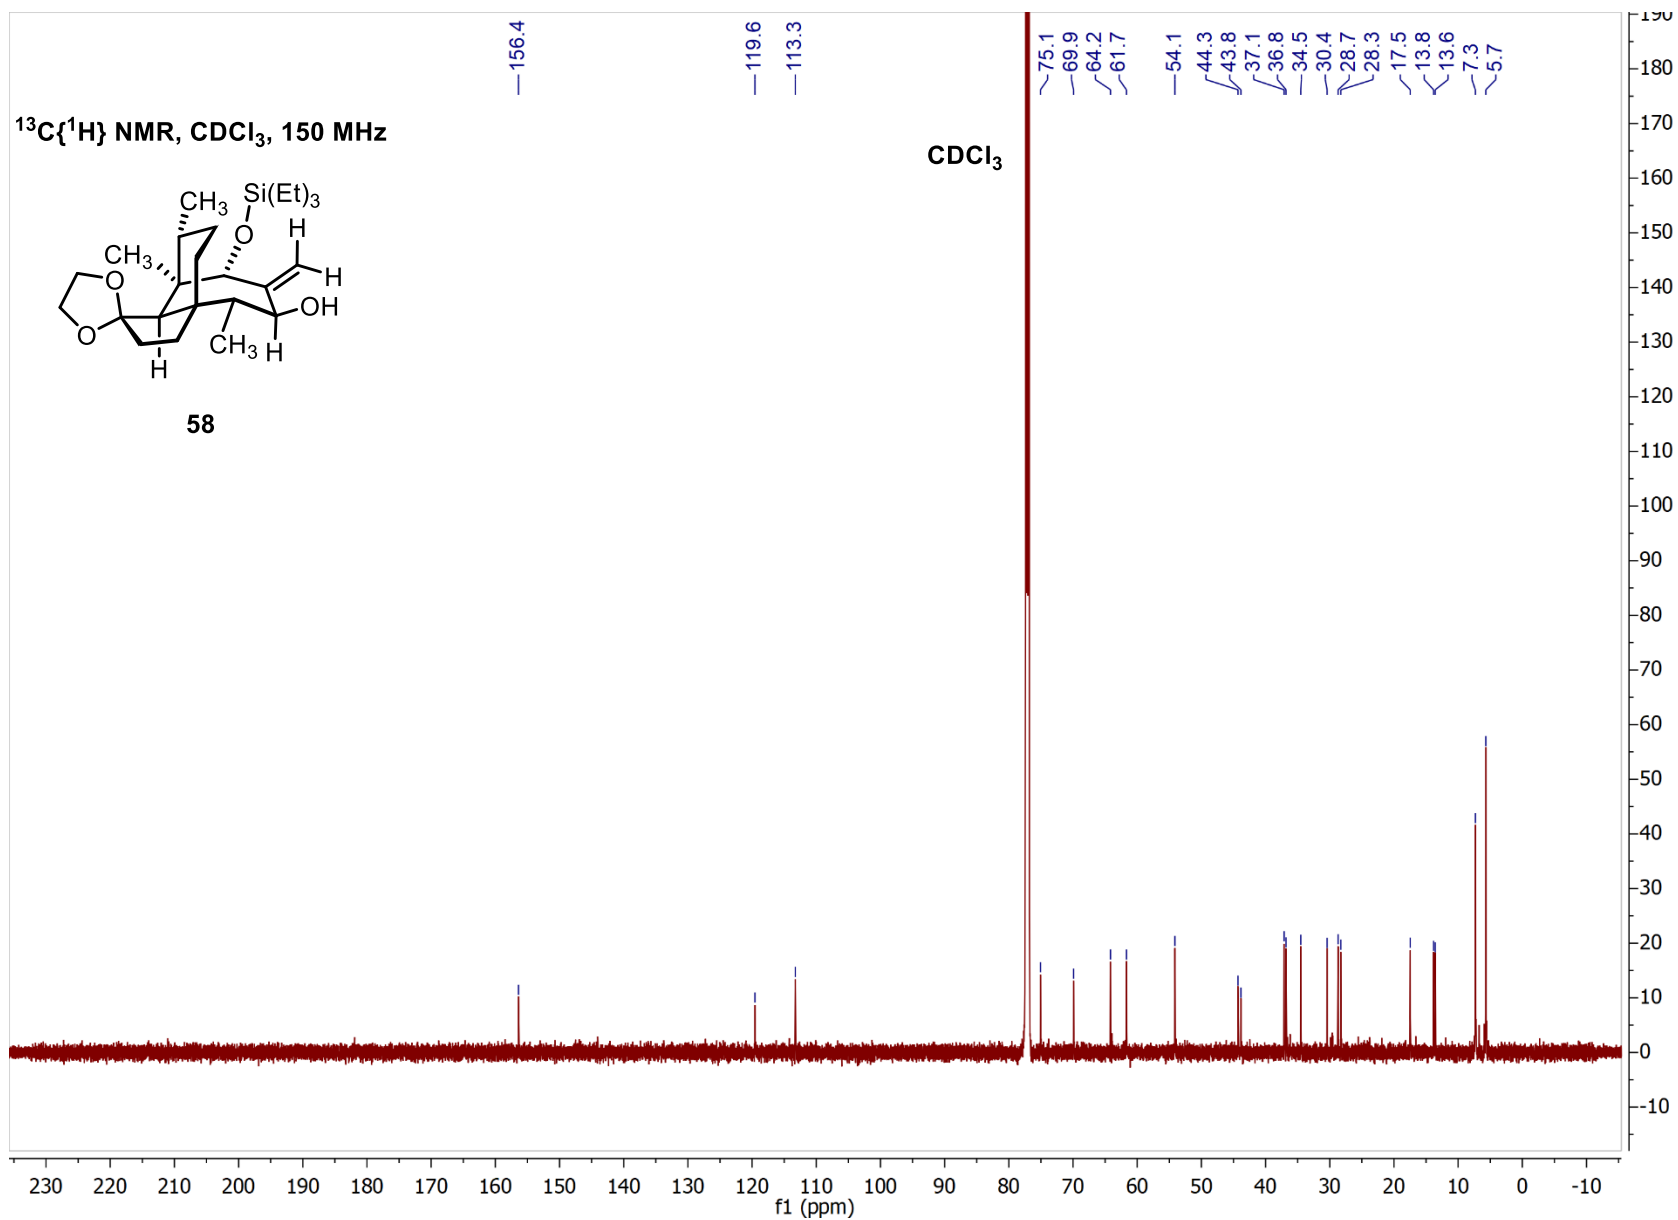



58, NOESY, CDCl<sub>3</sub>, 500 MHz

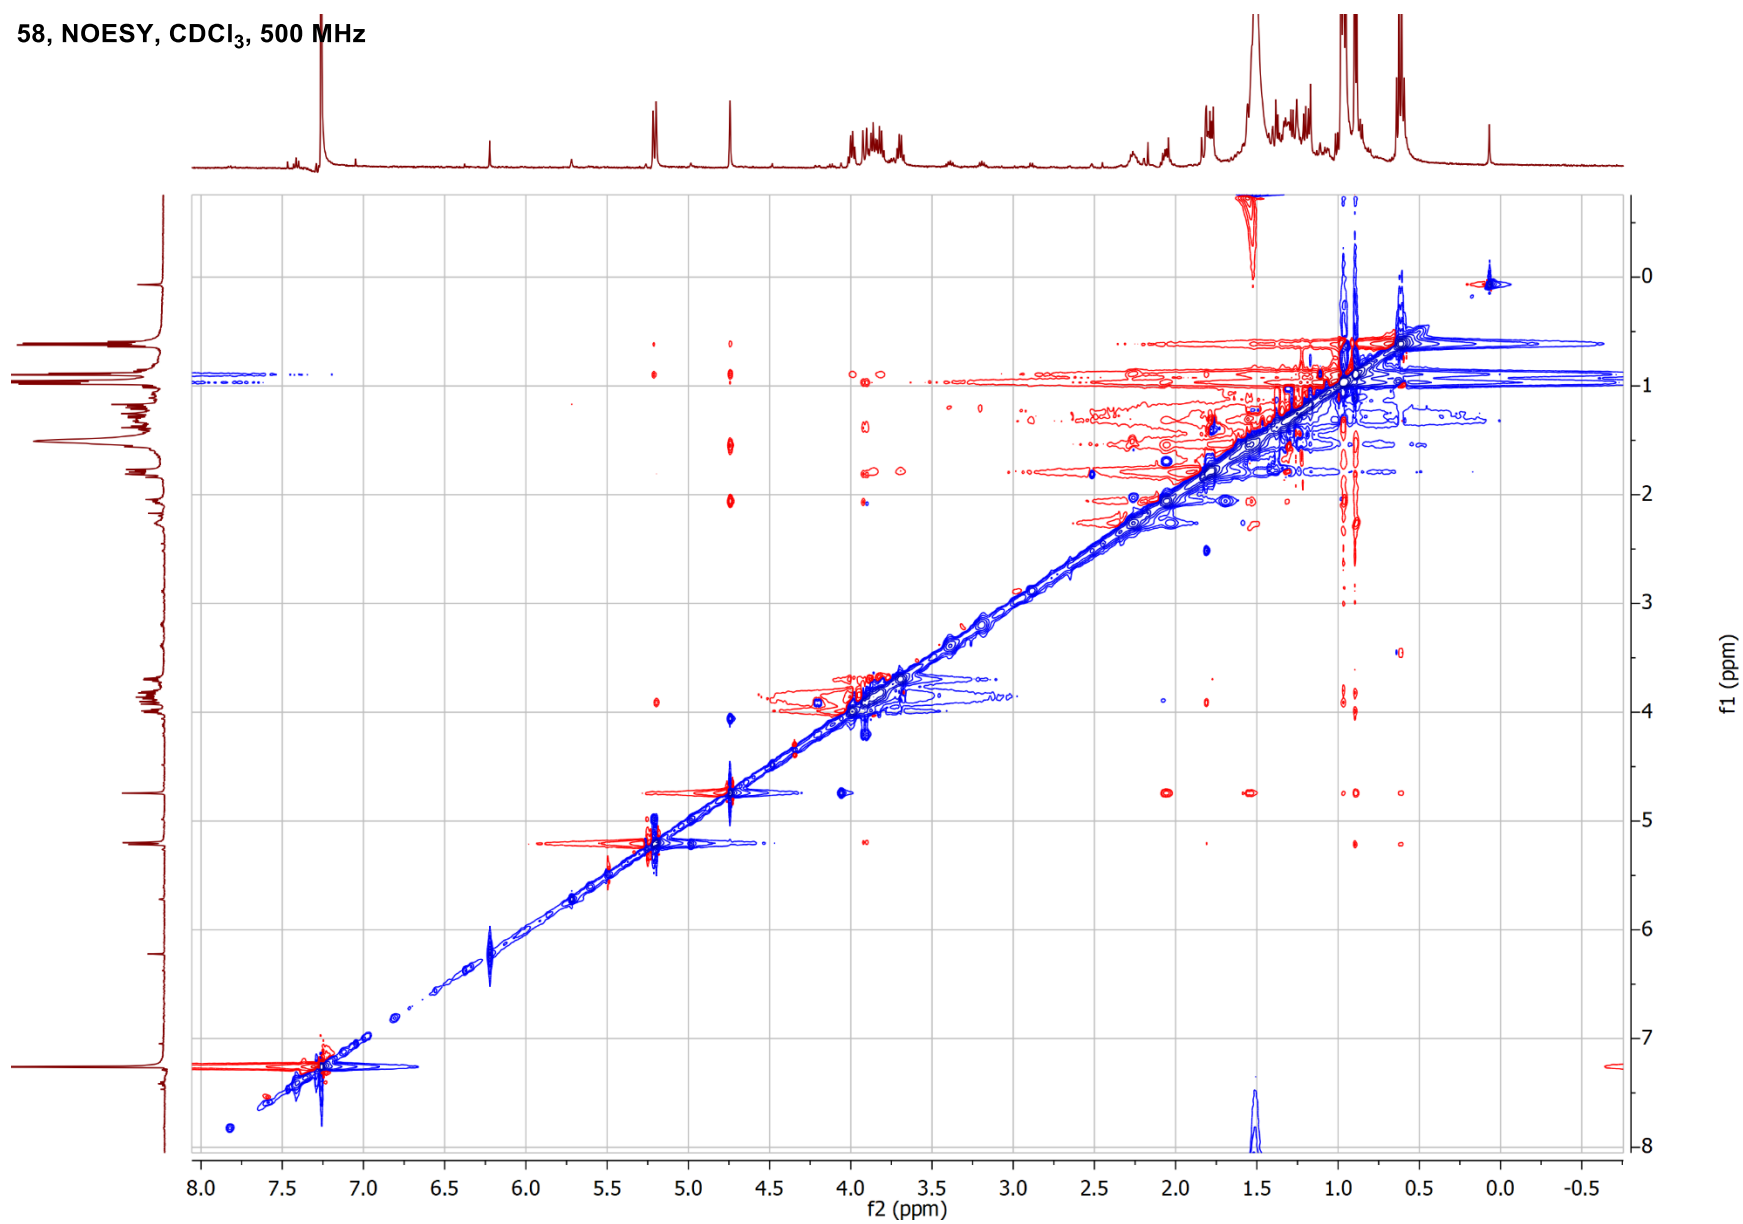

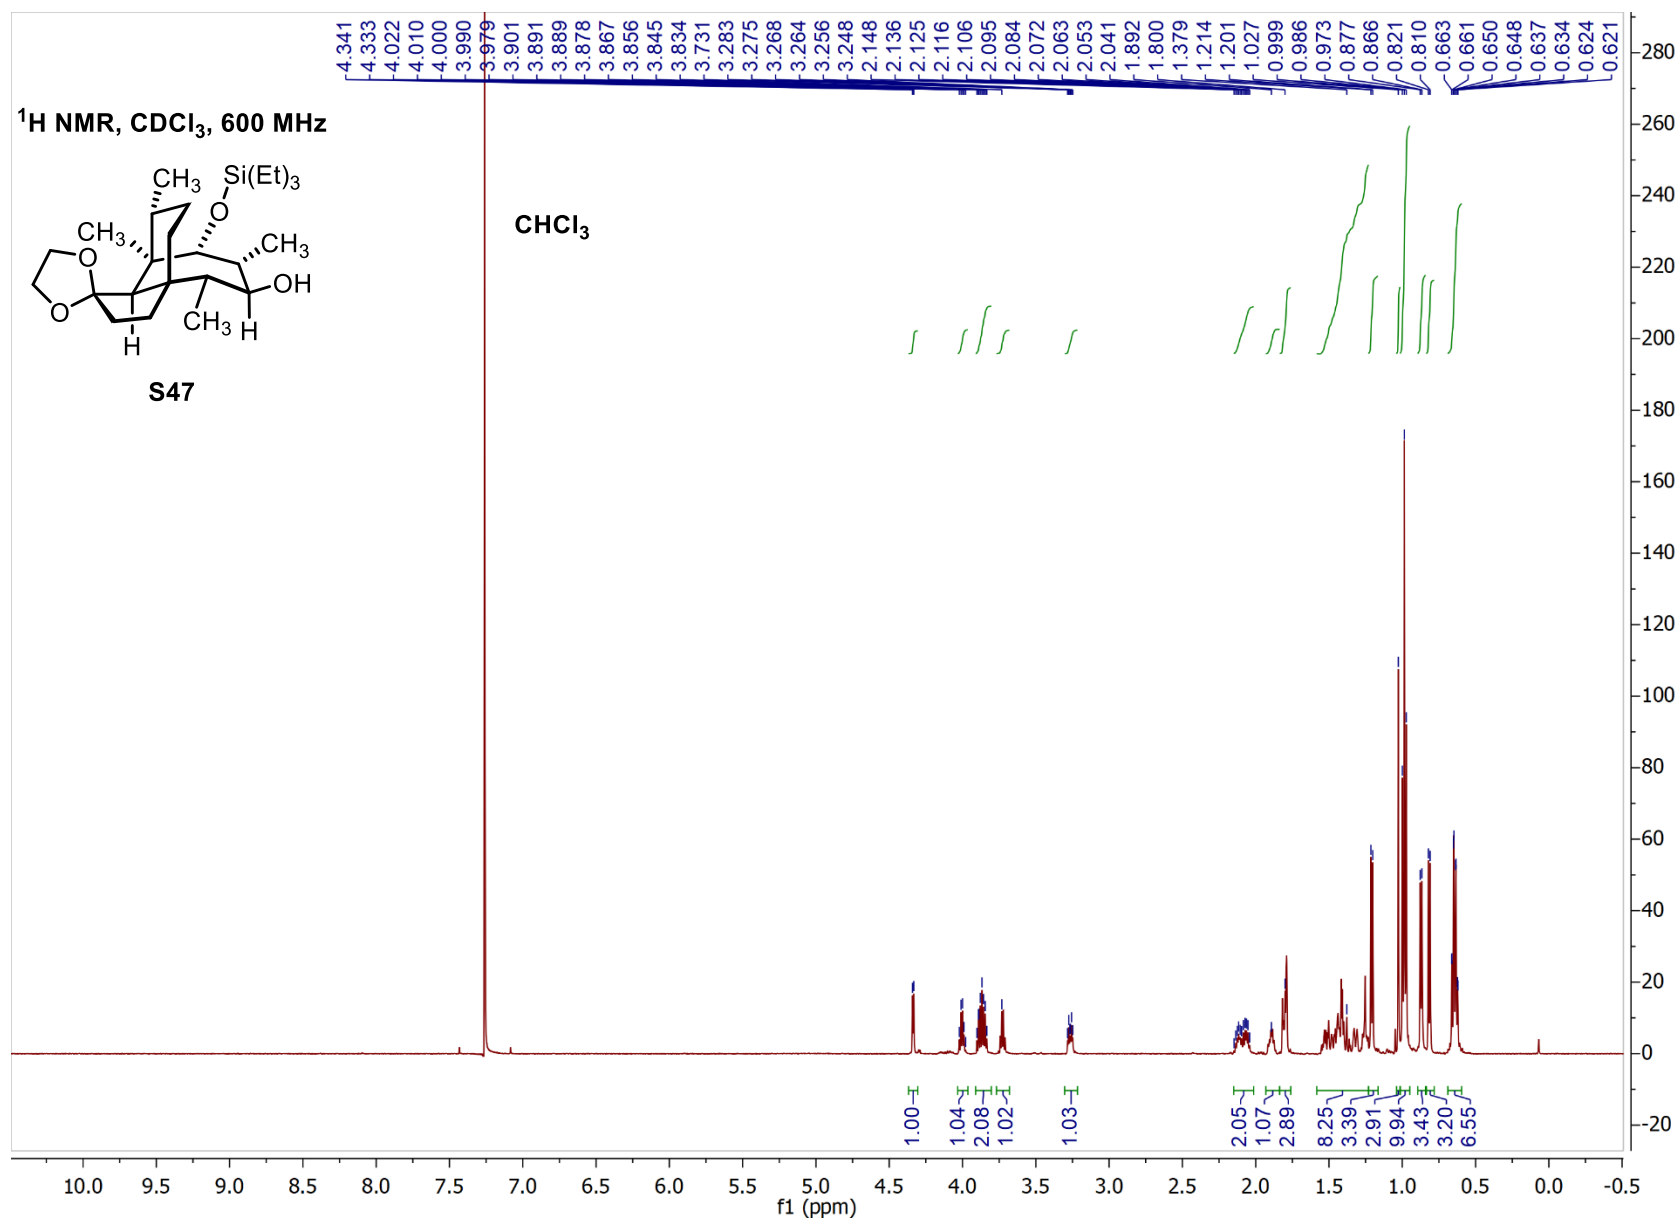

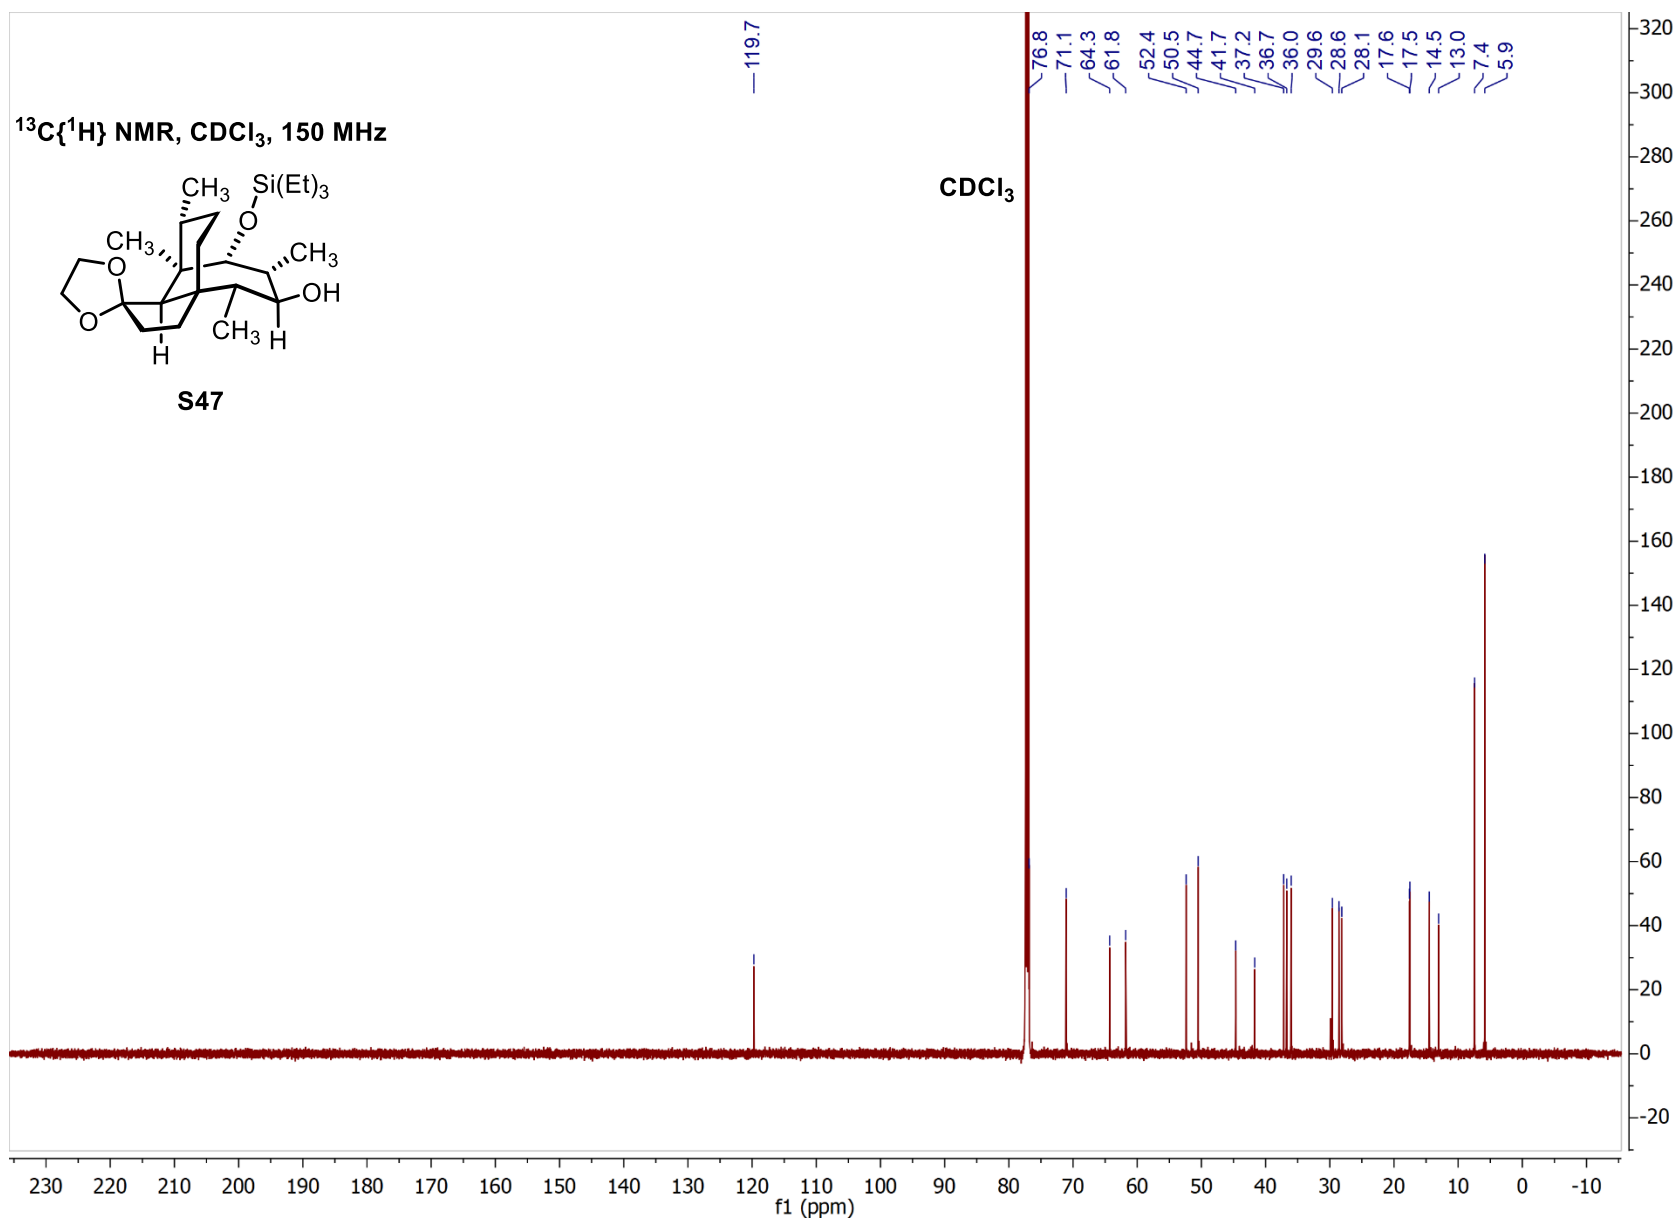

S47, NOESY, CDCl<sub>3</sub>, 500 MHz

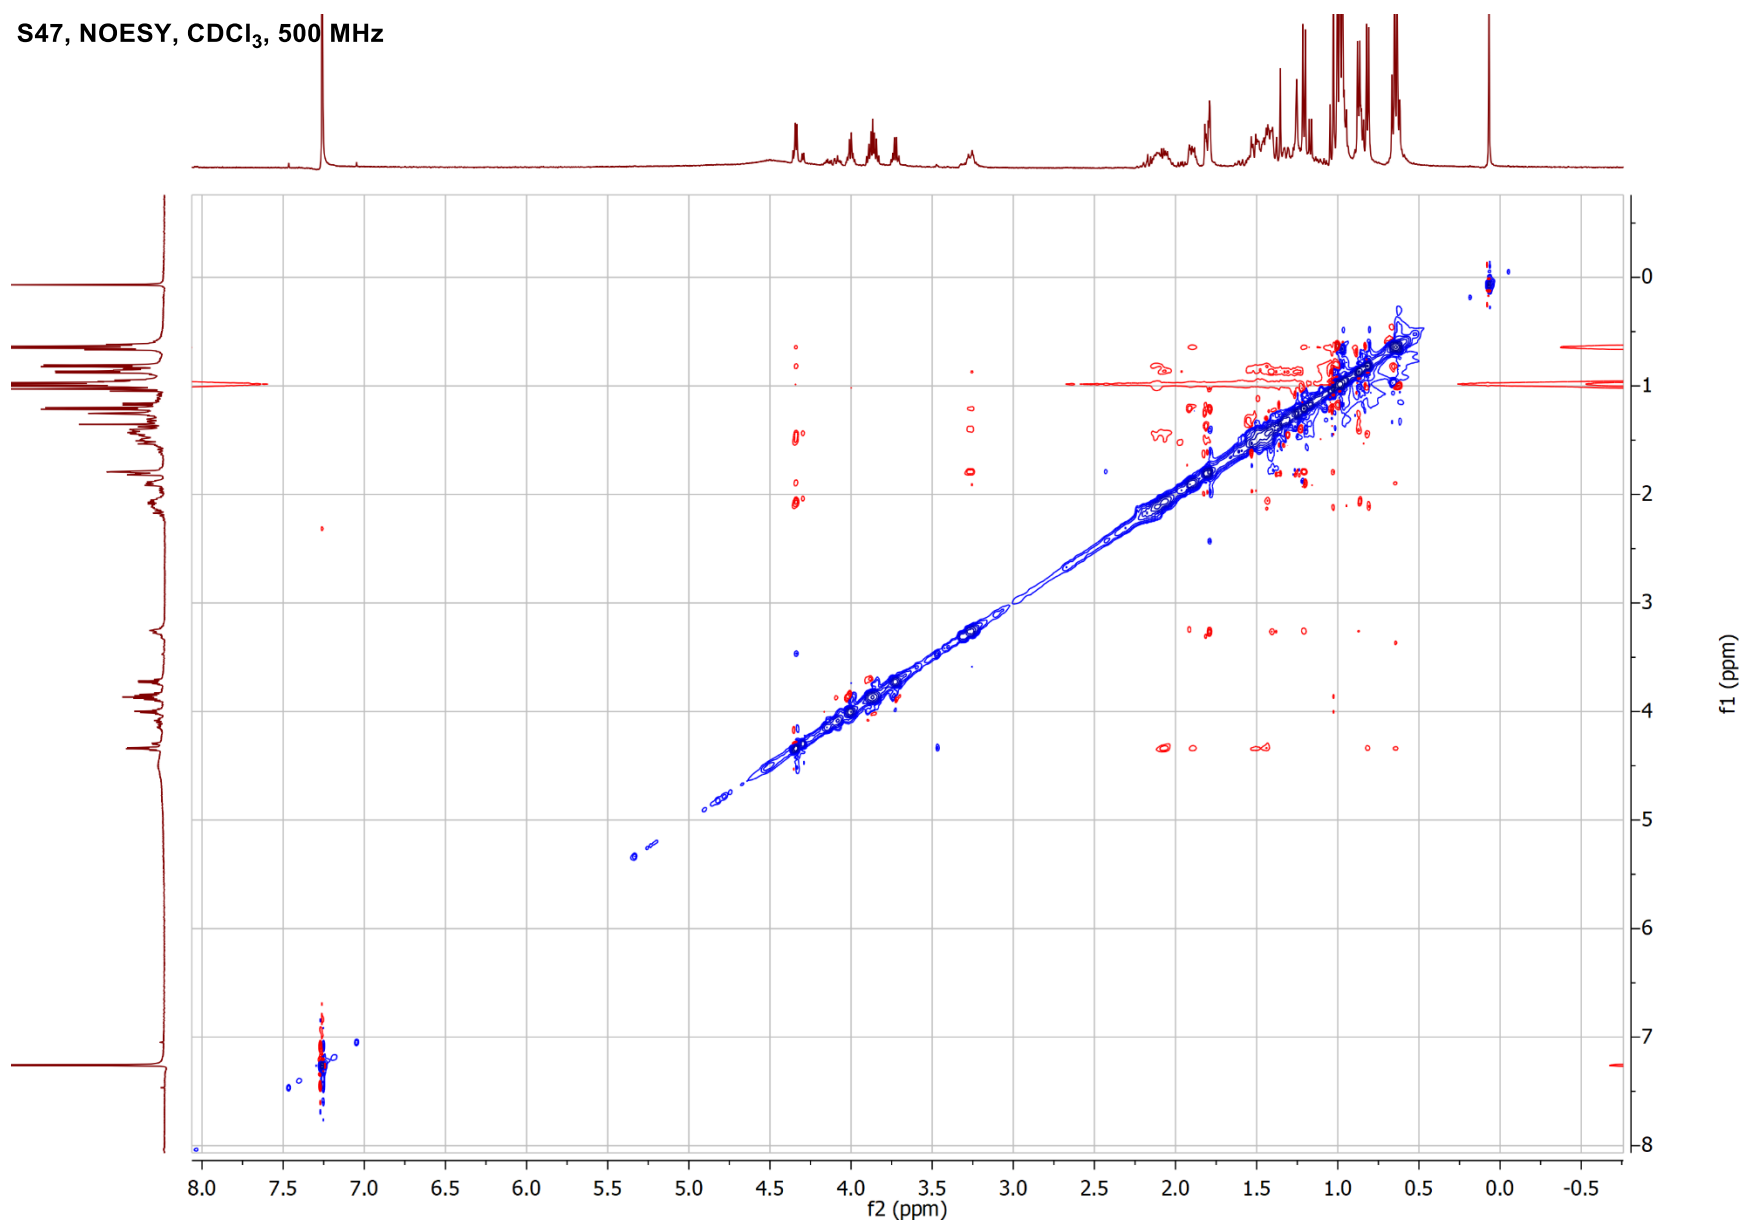

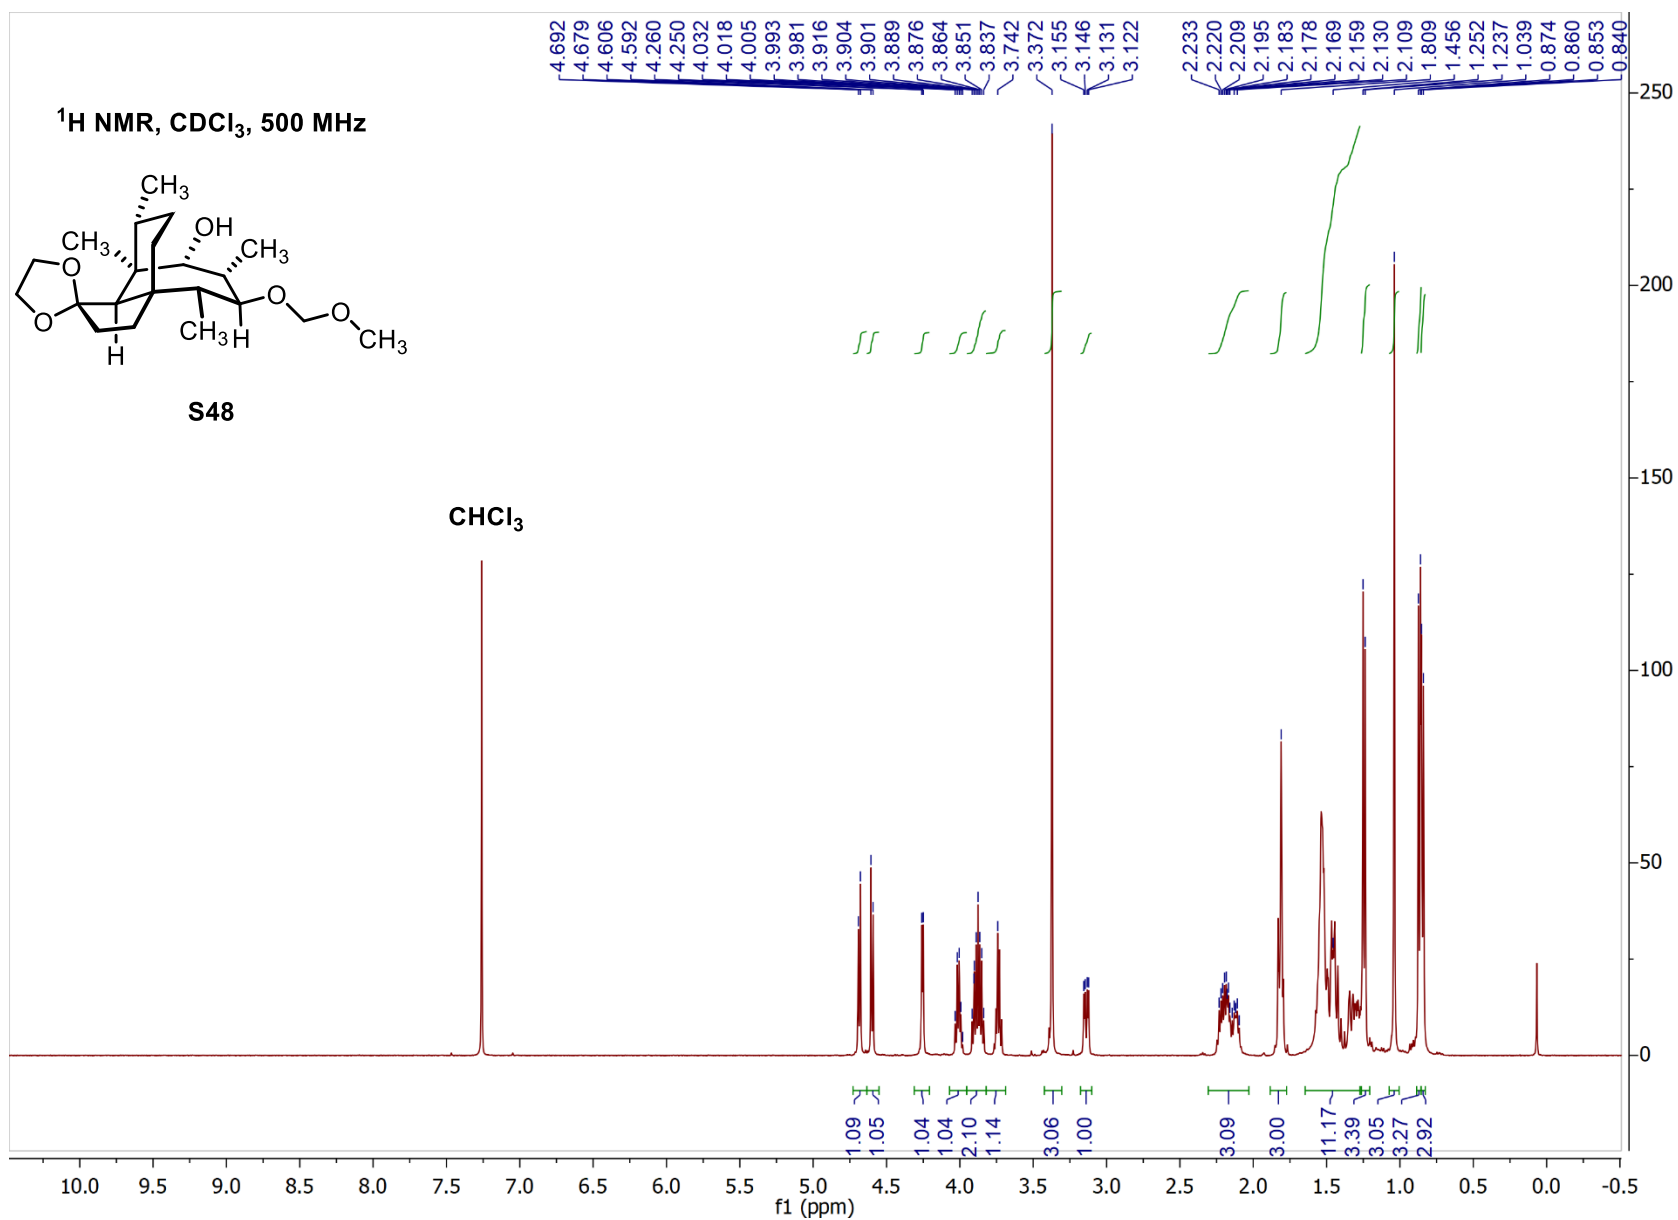

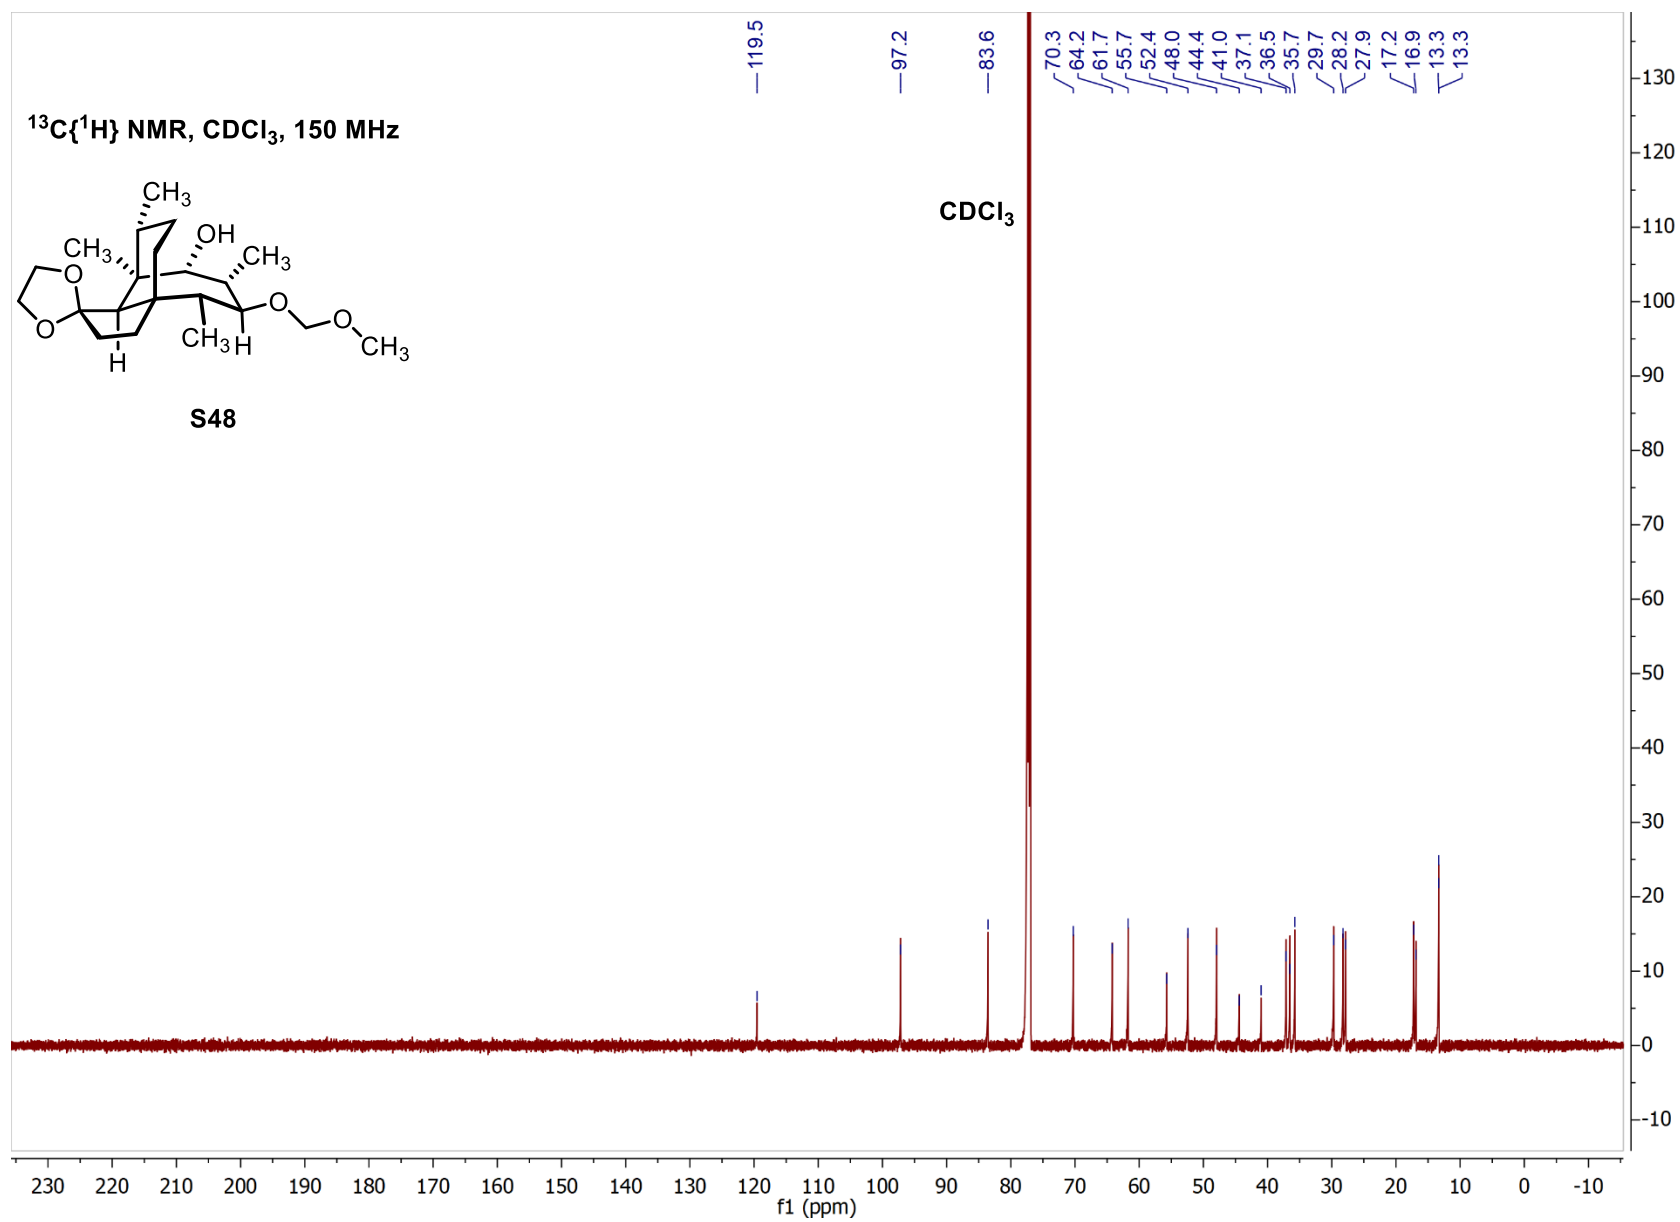

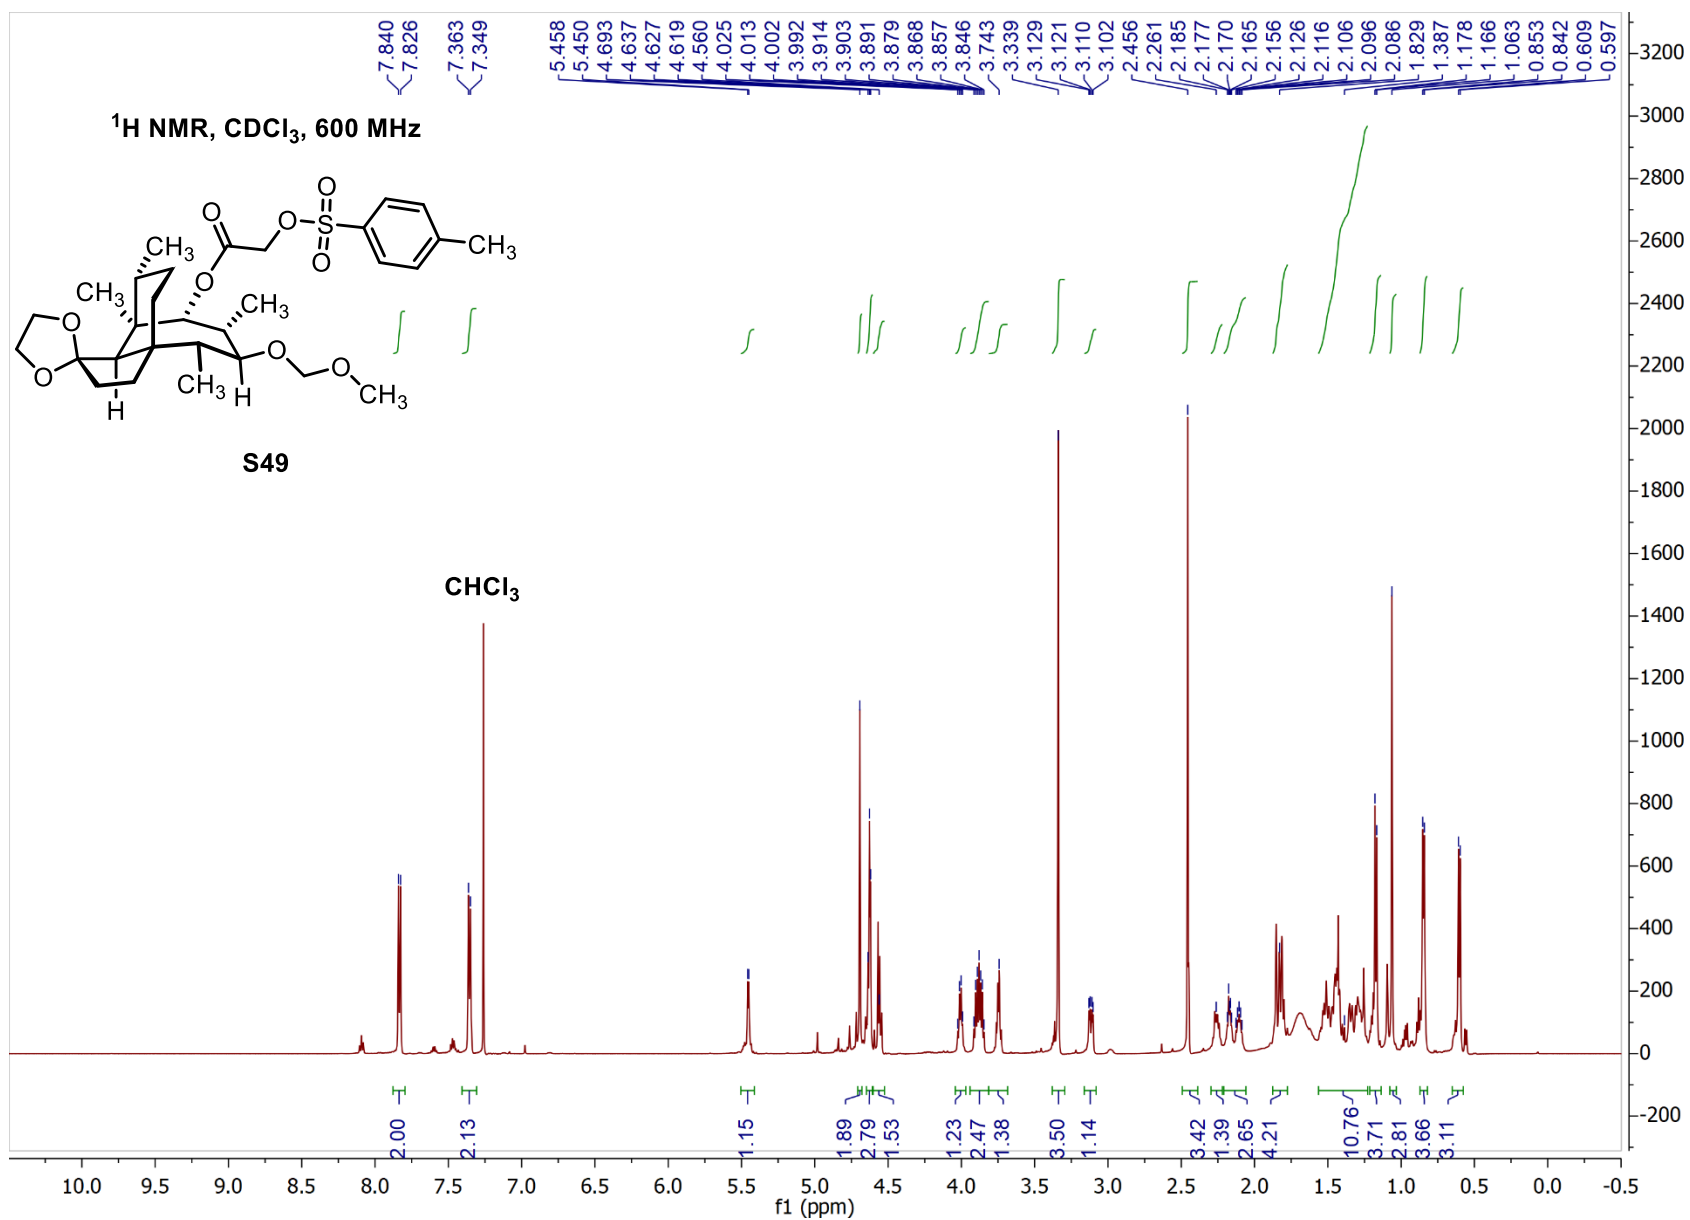

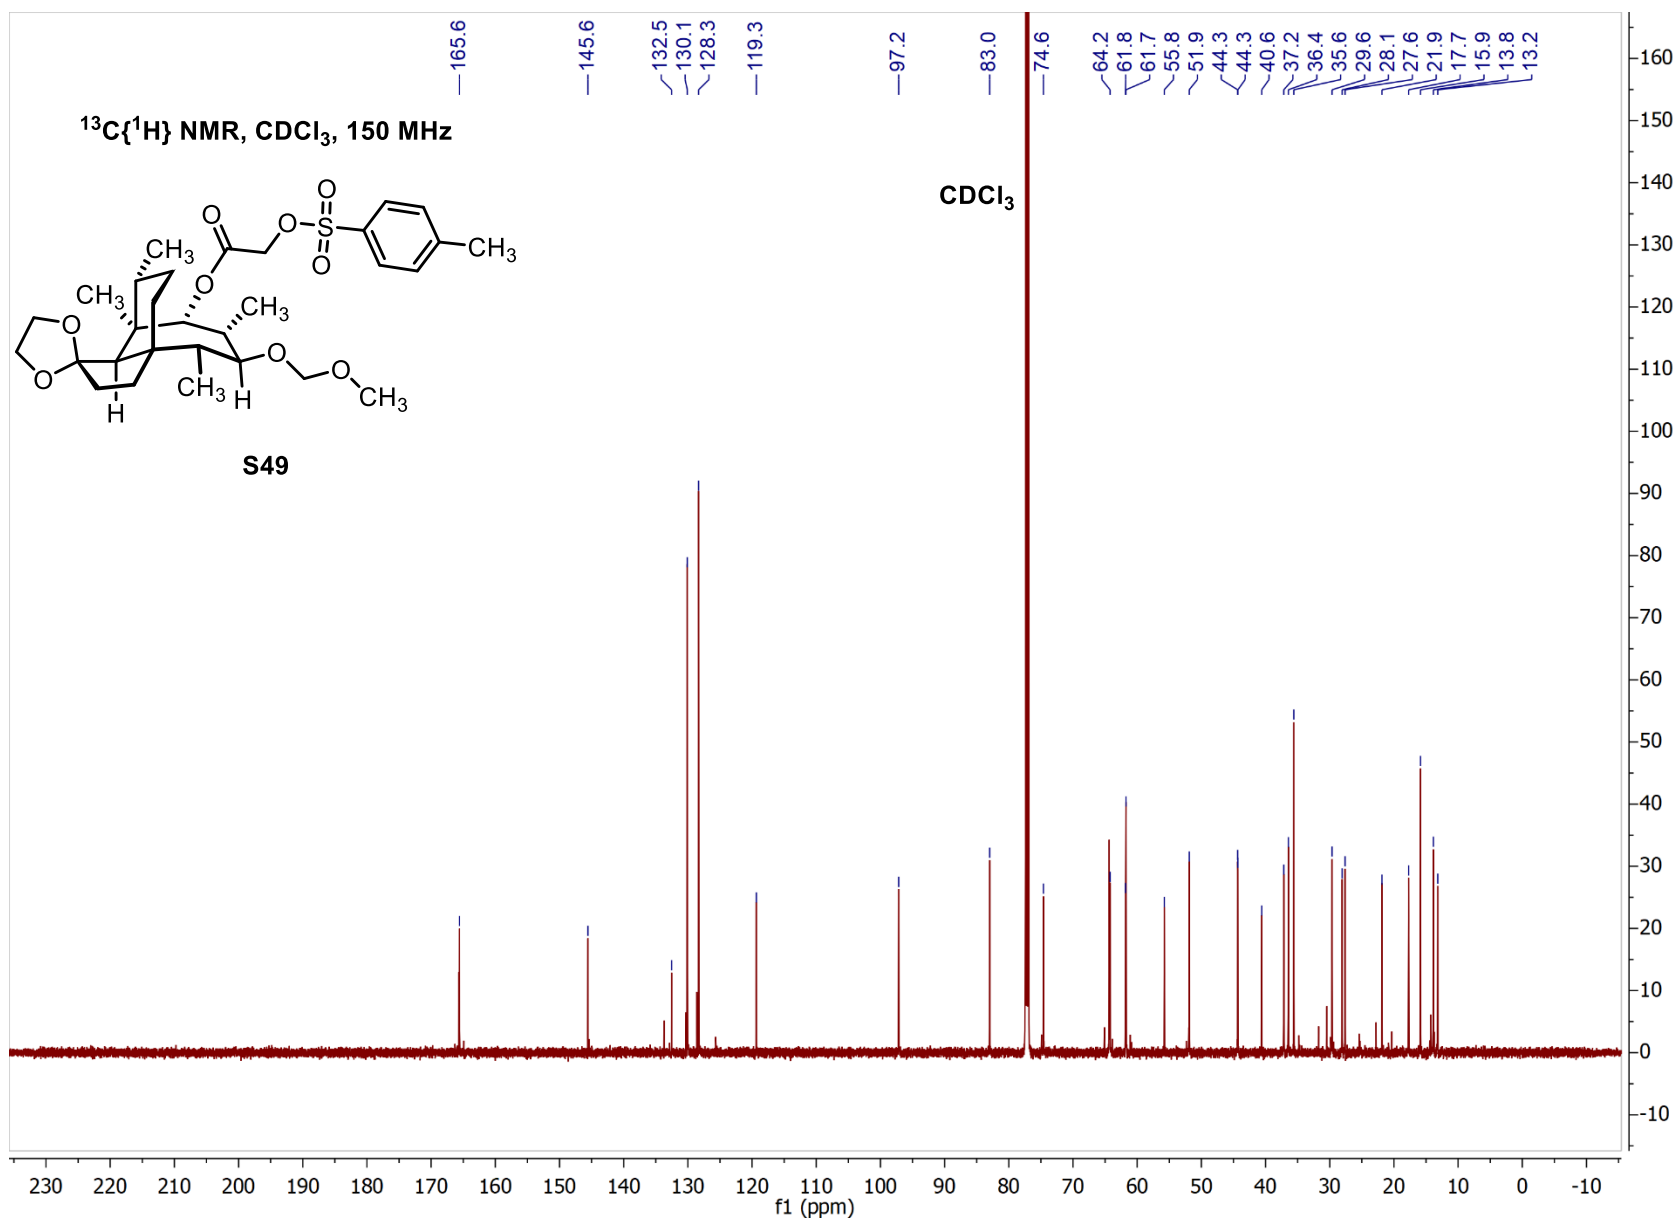



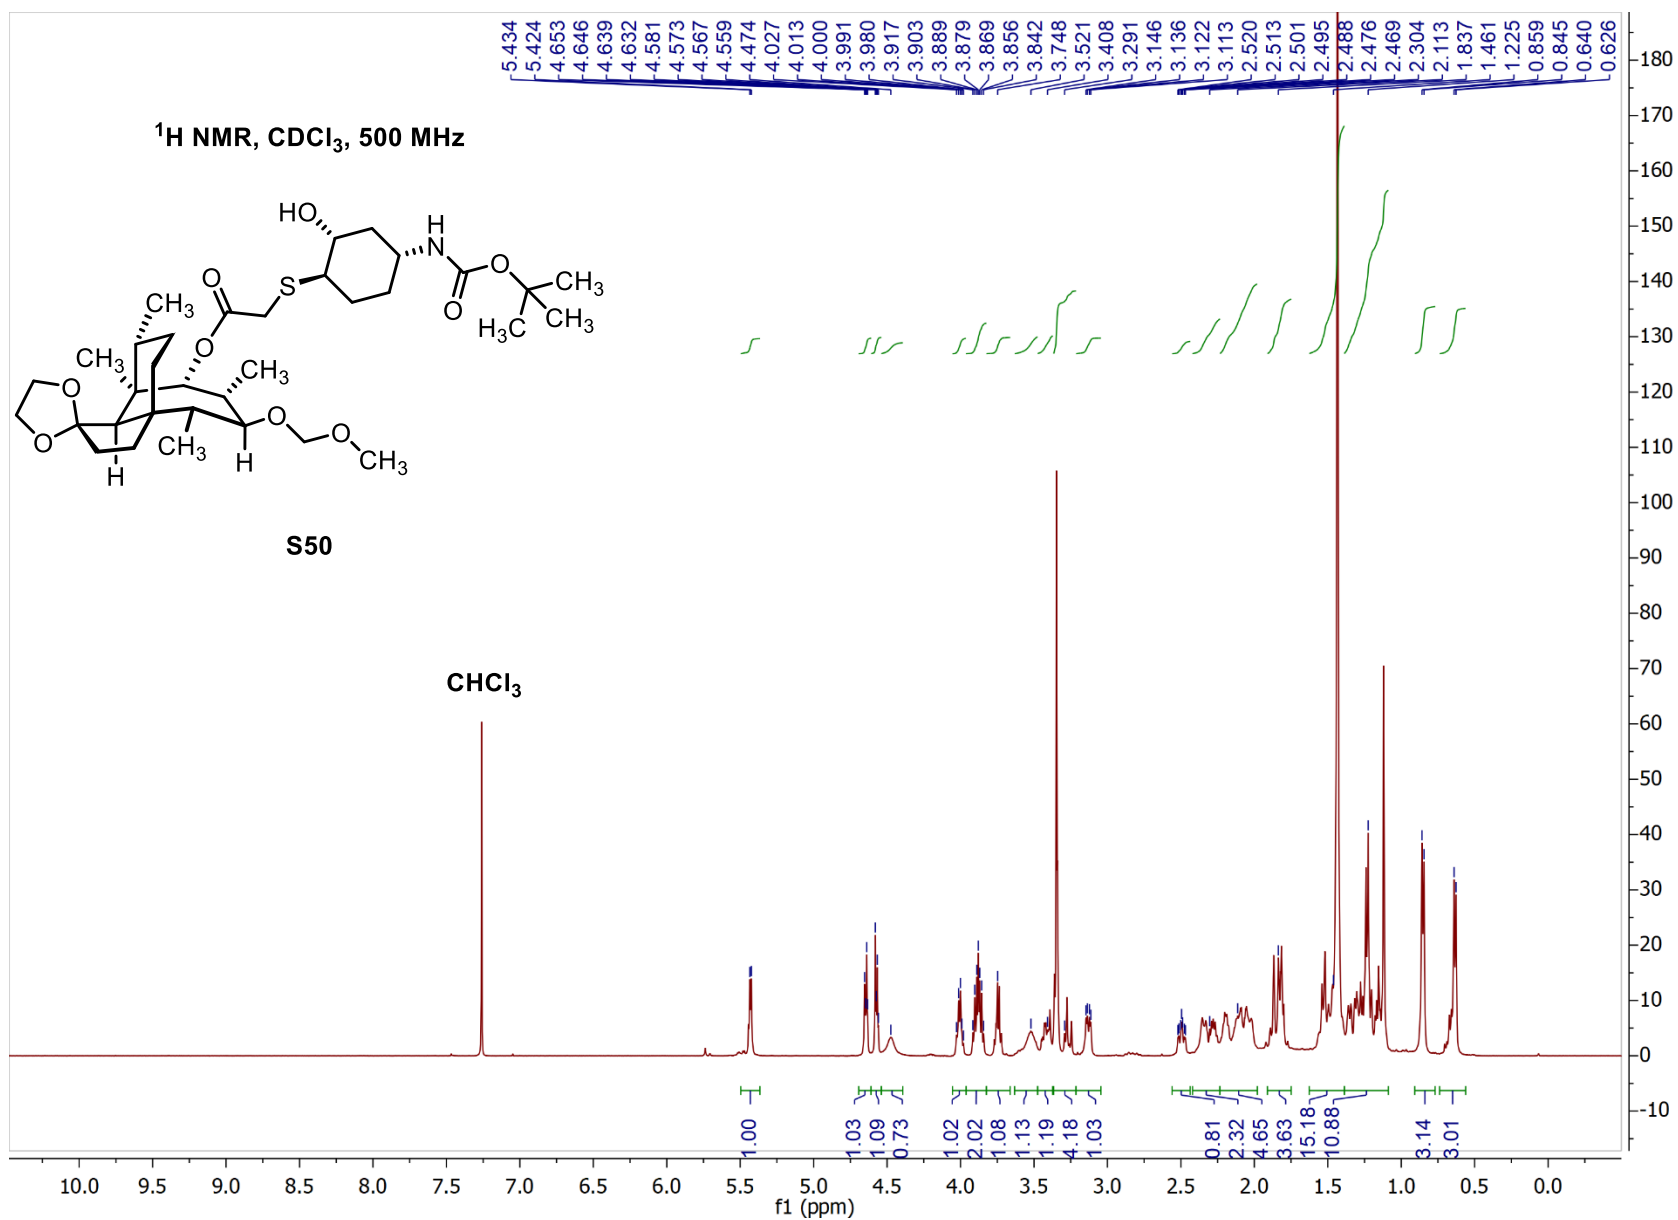

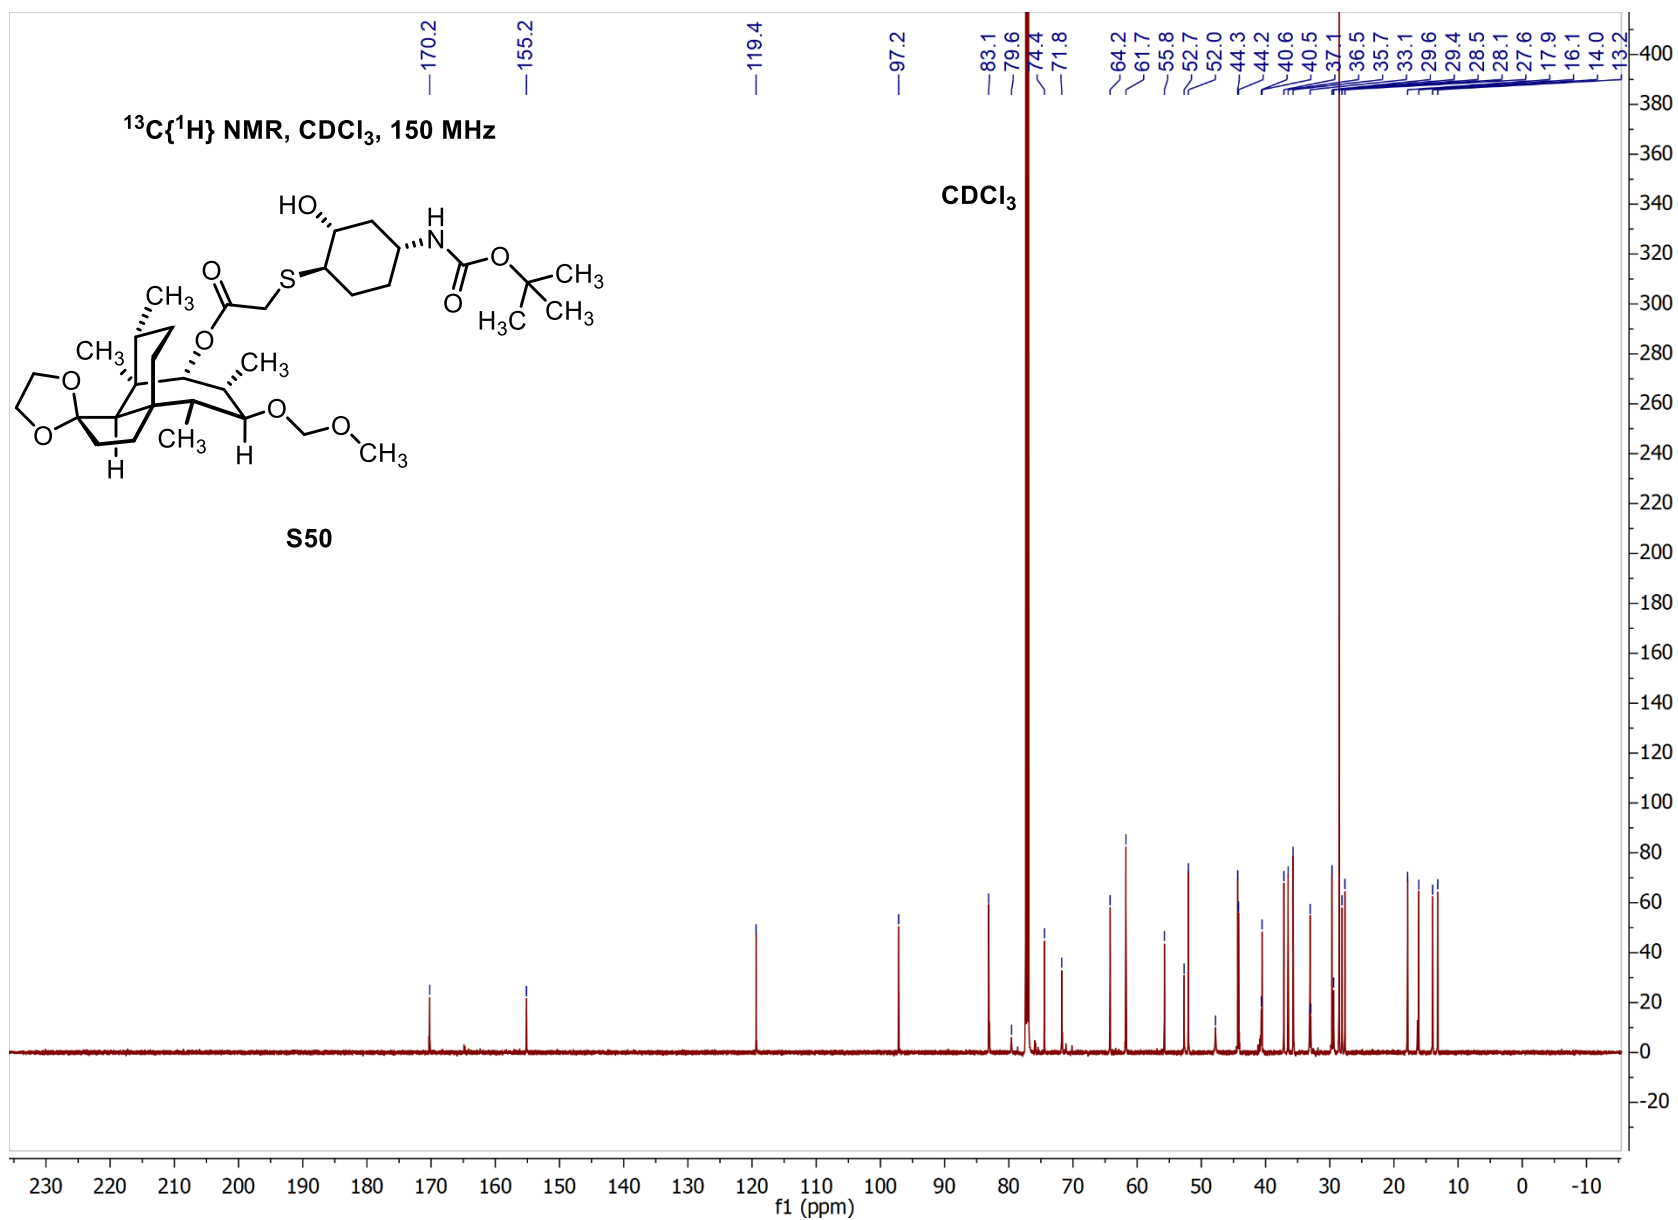

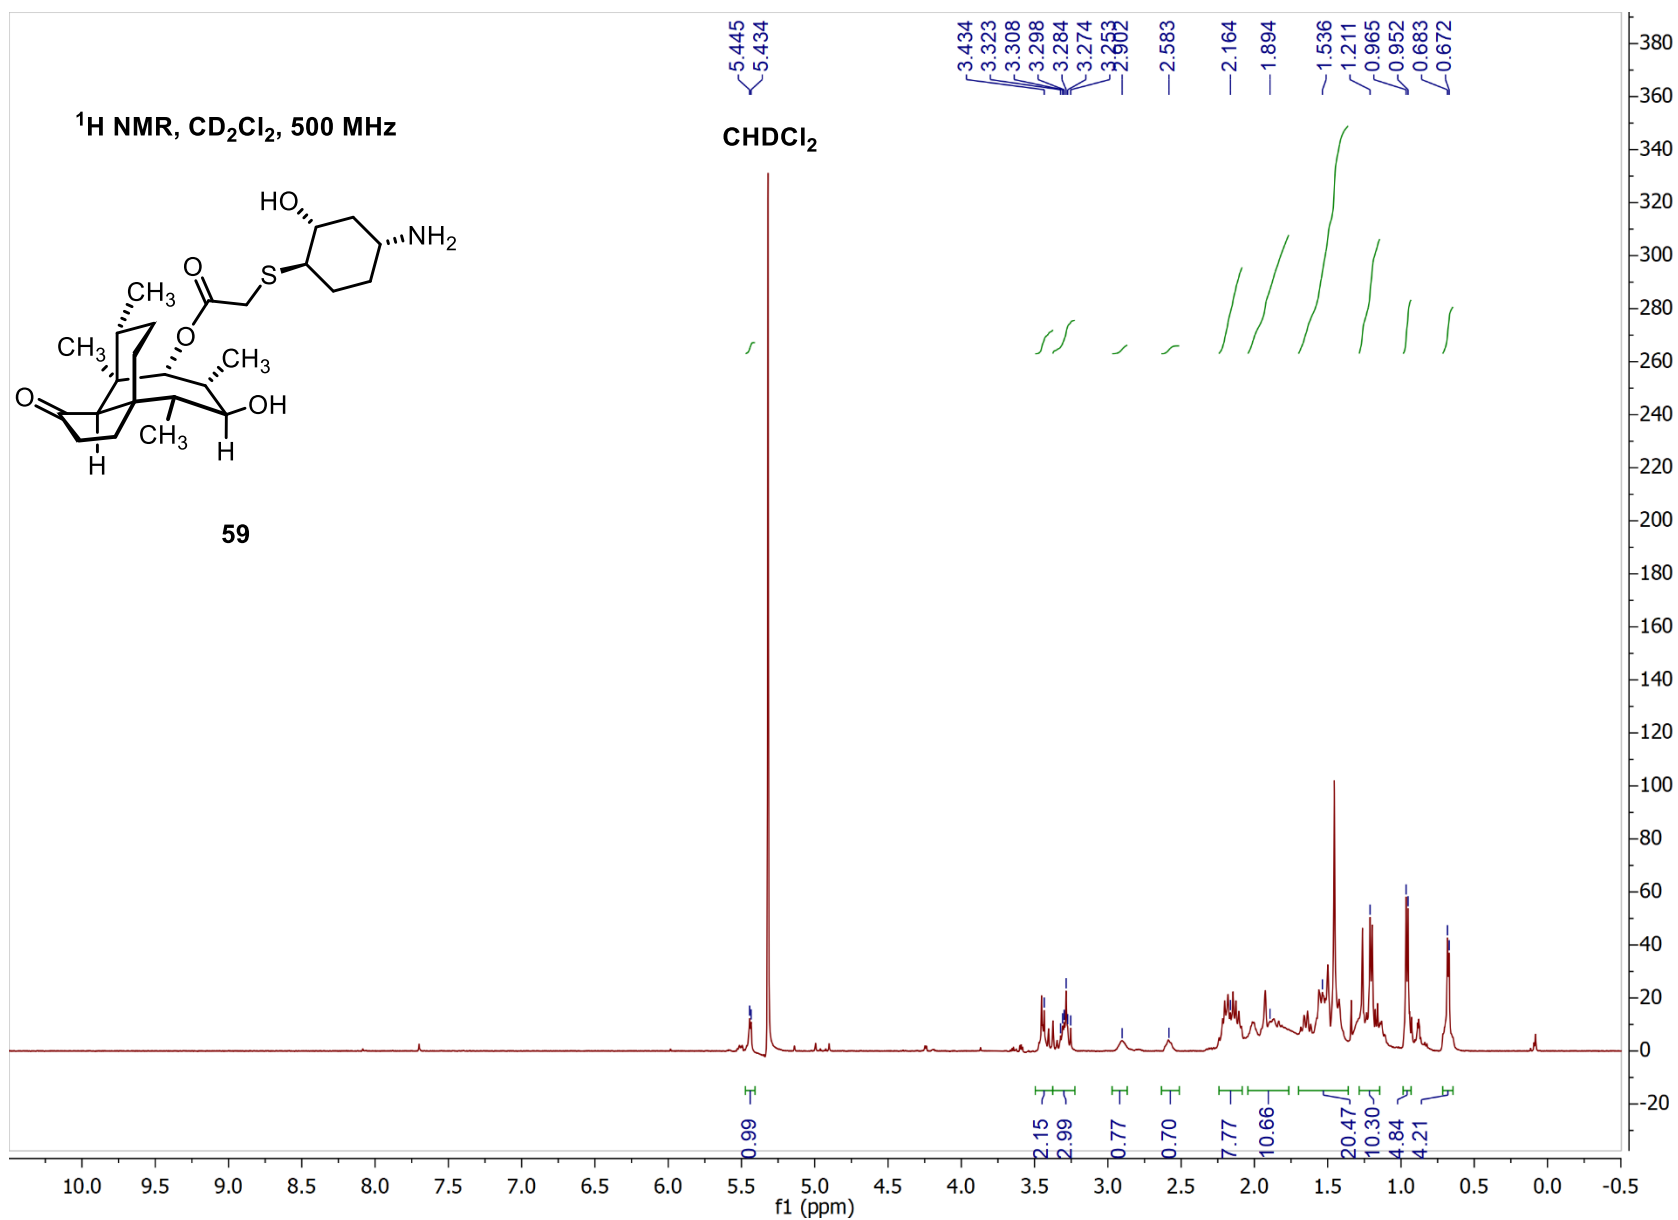

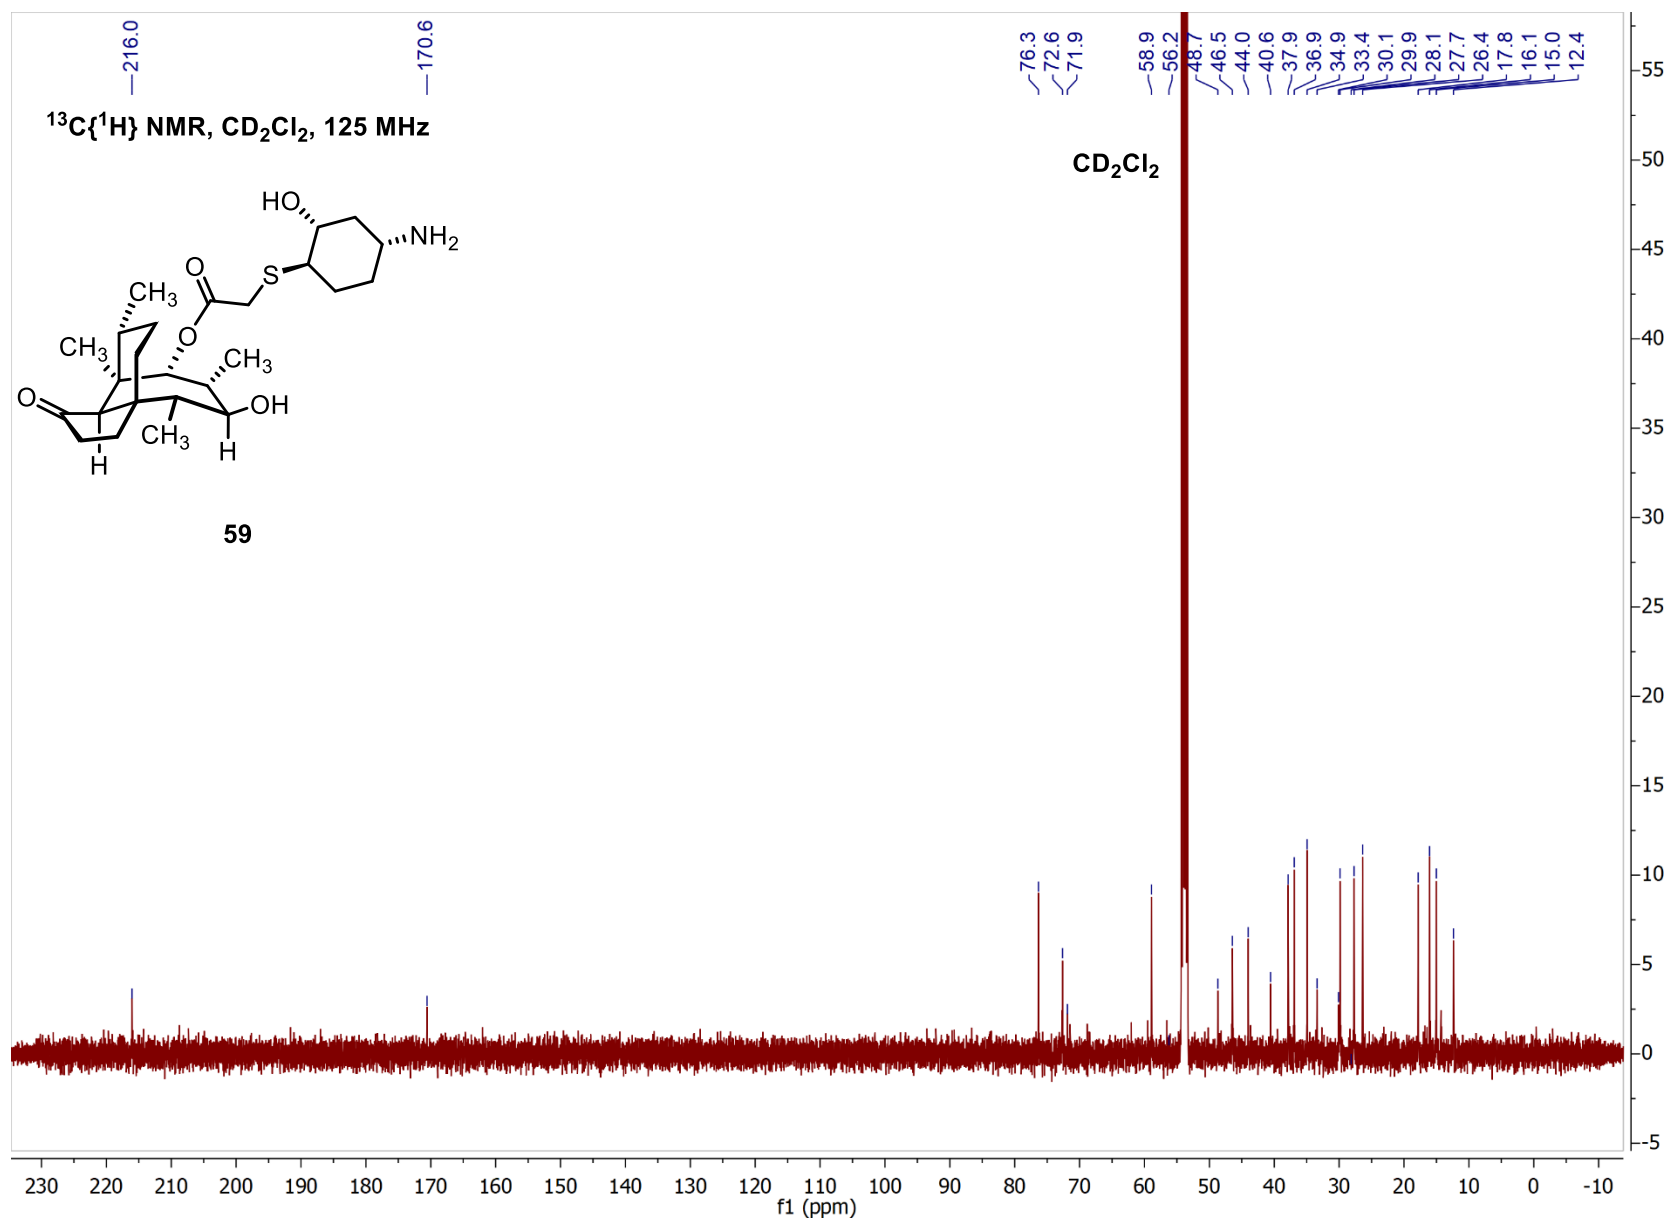

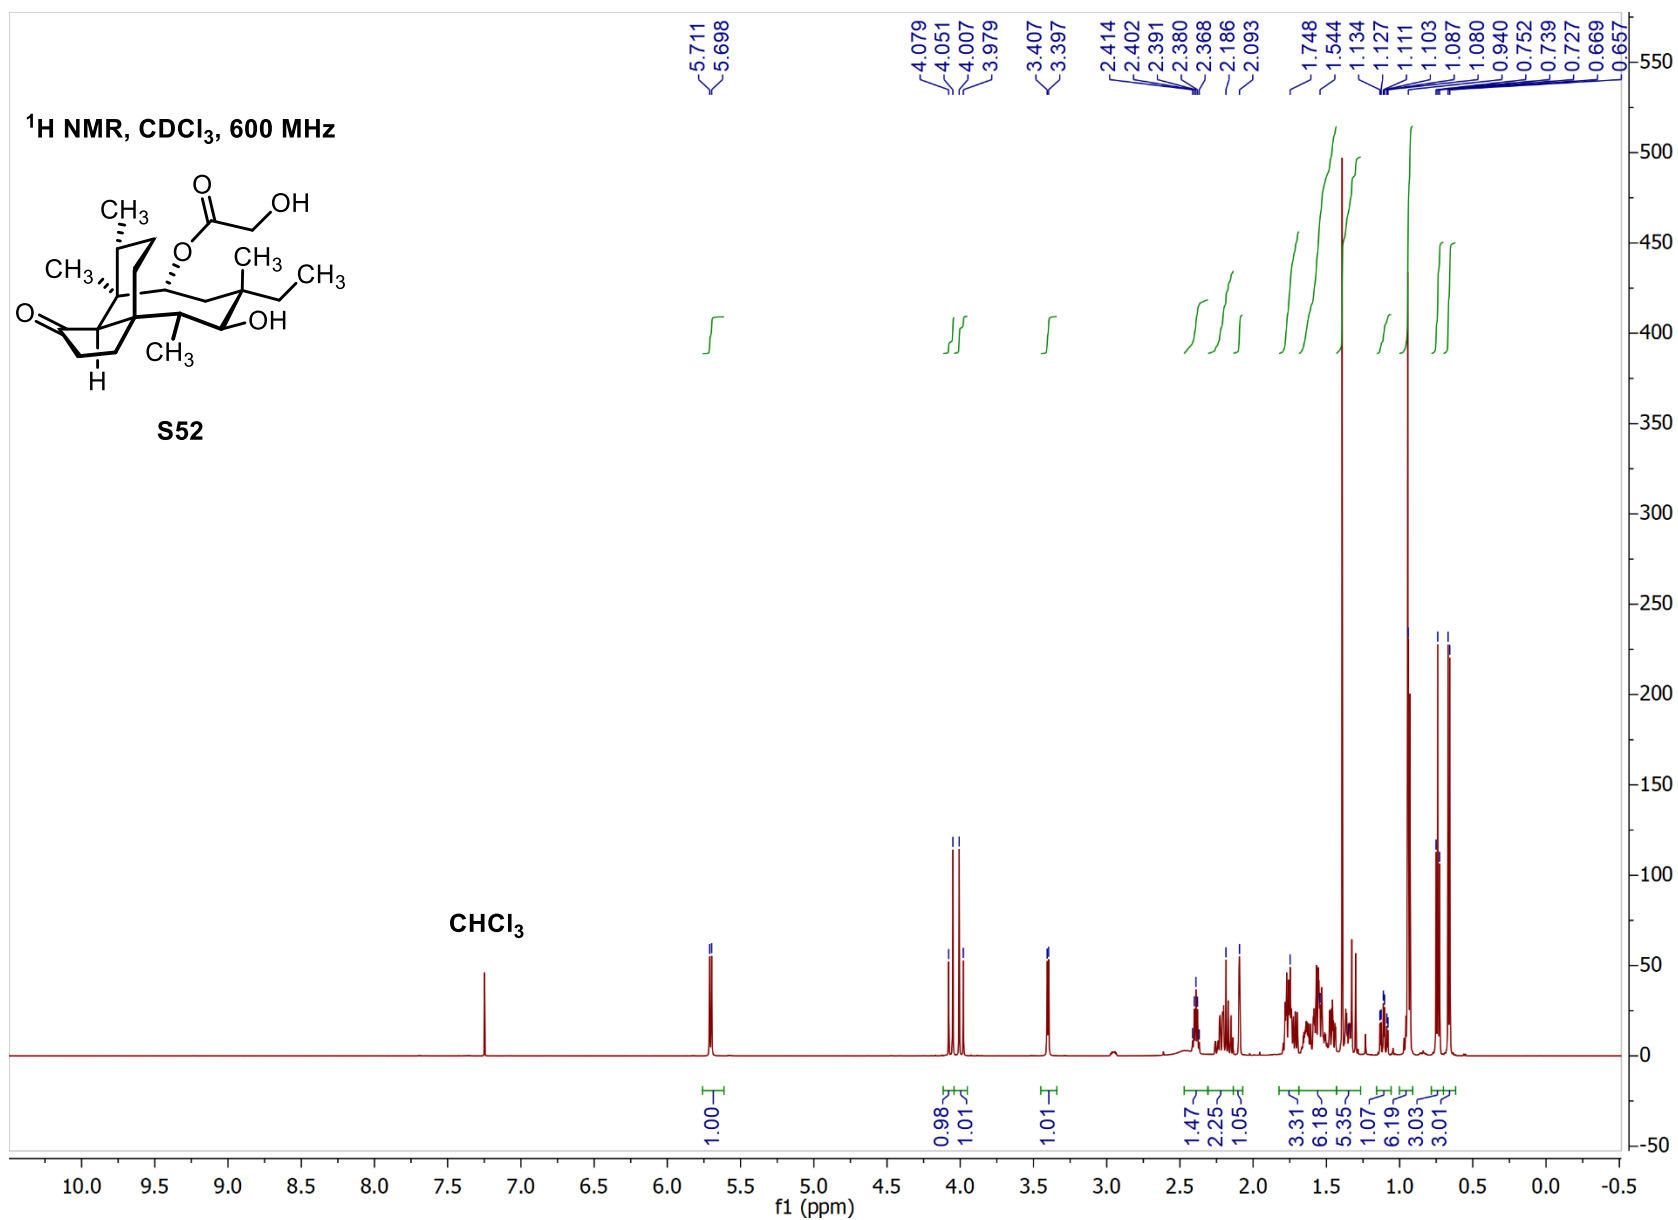

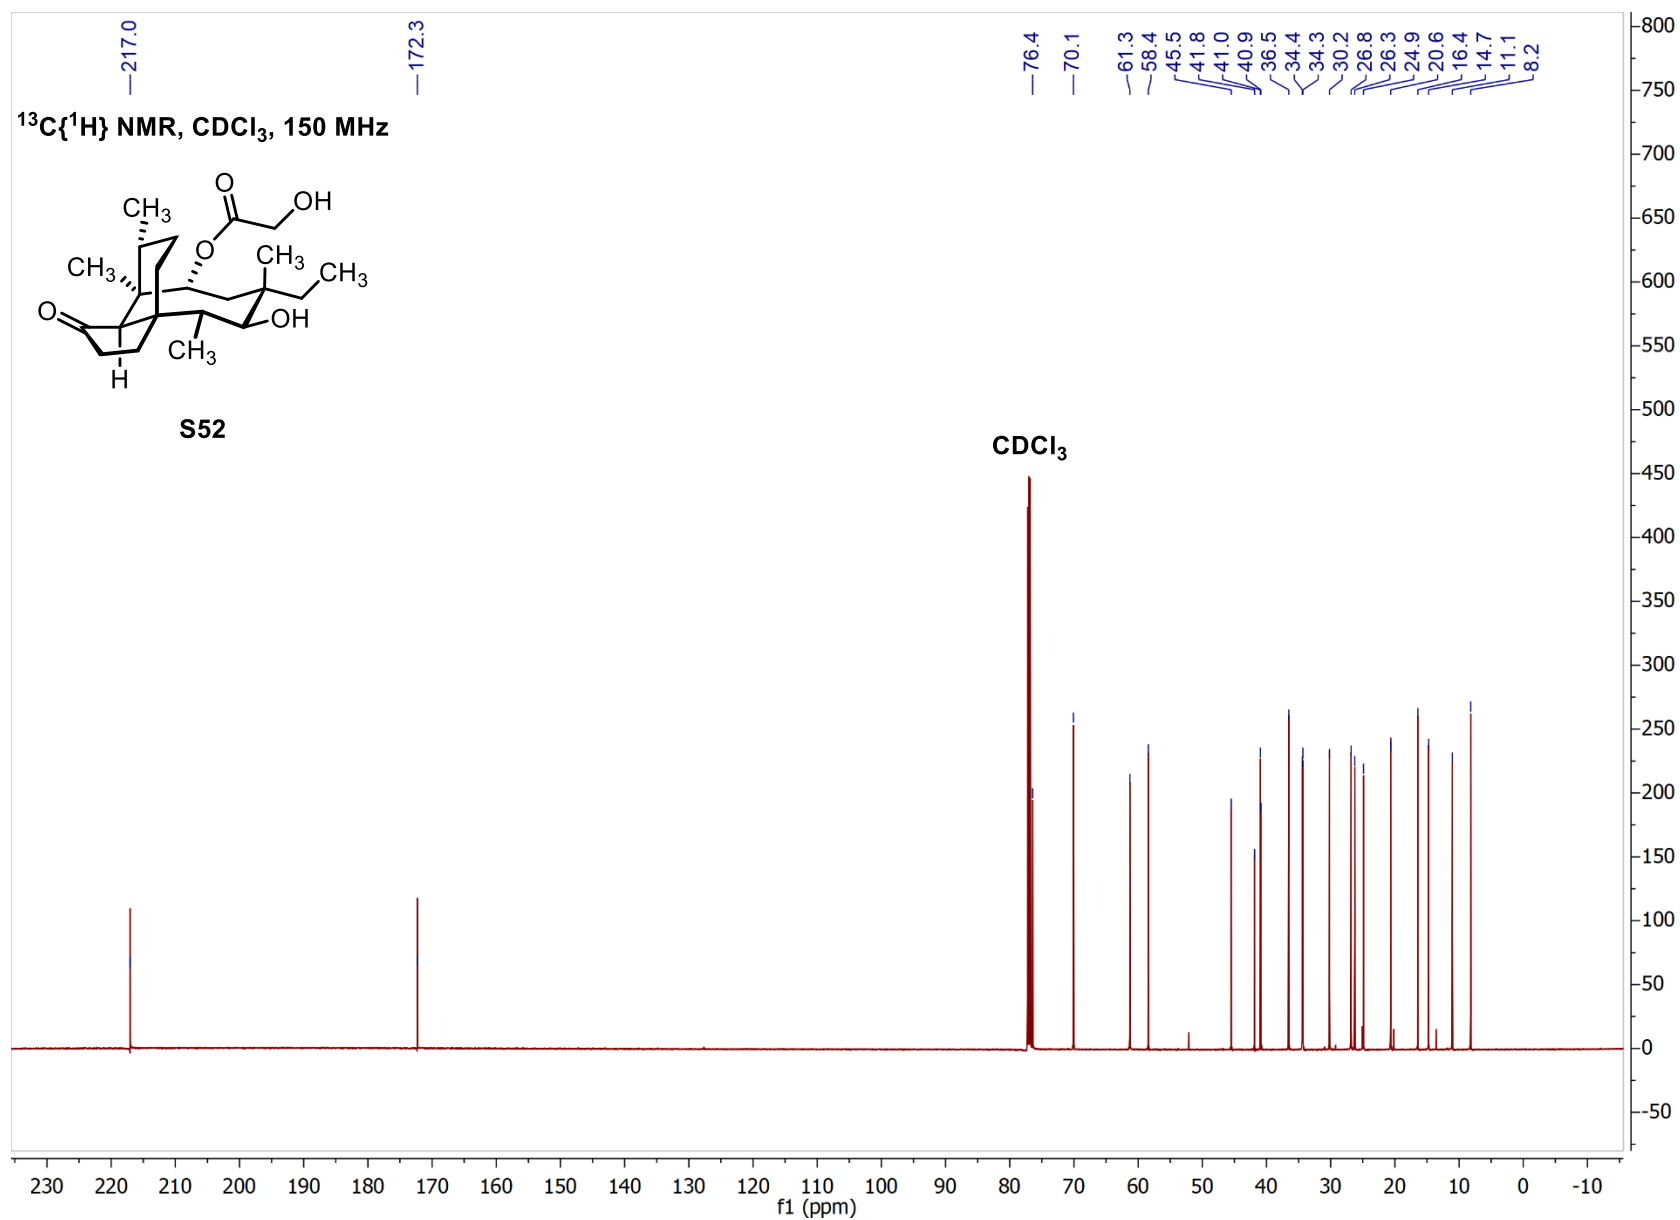

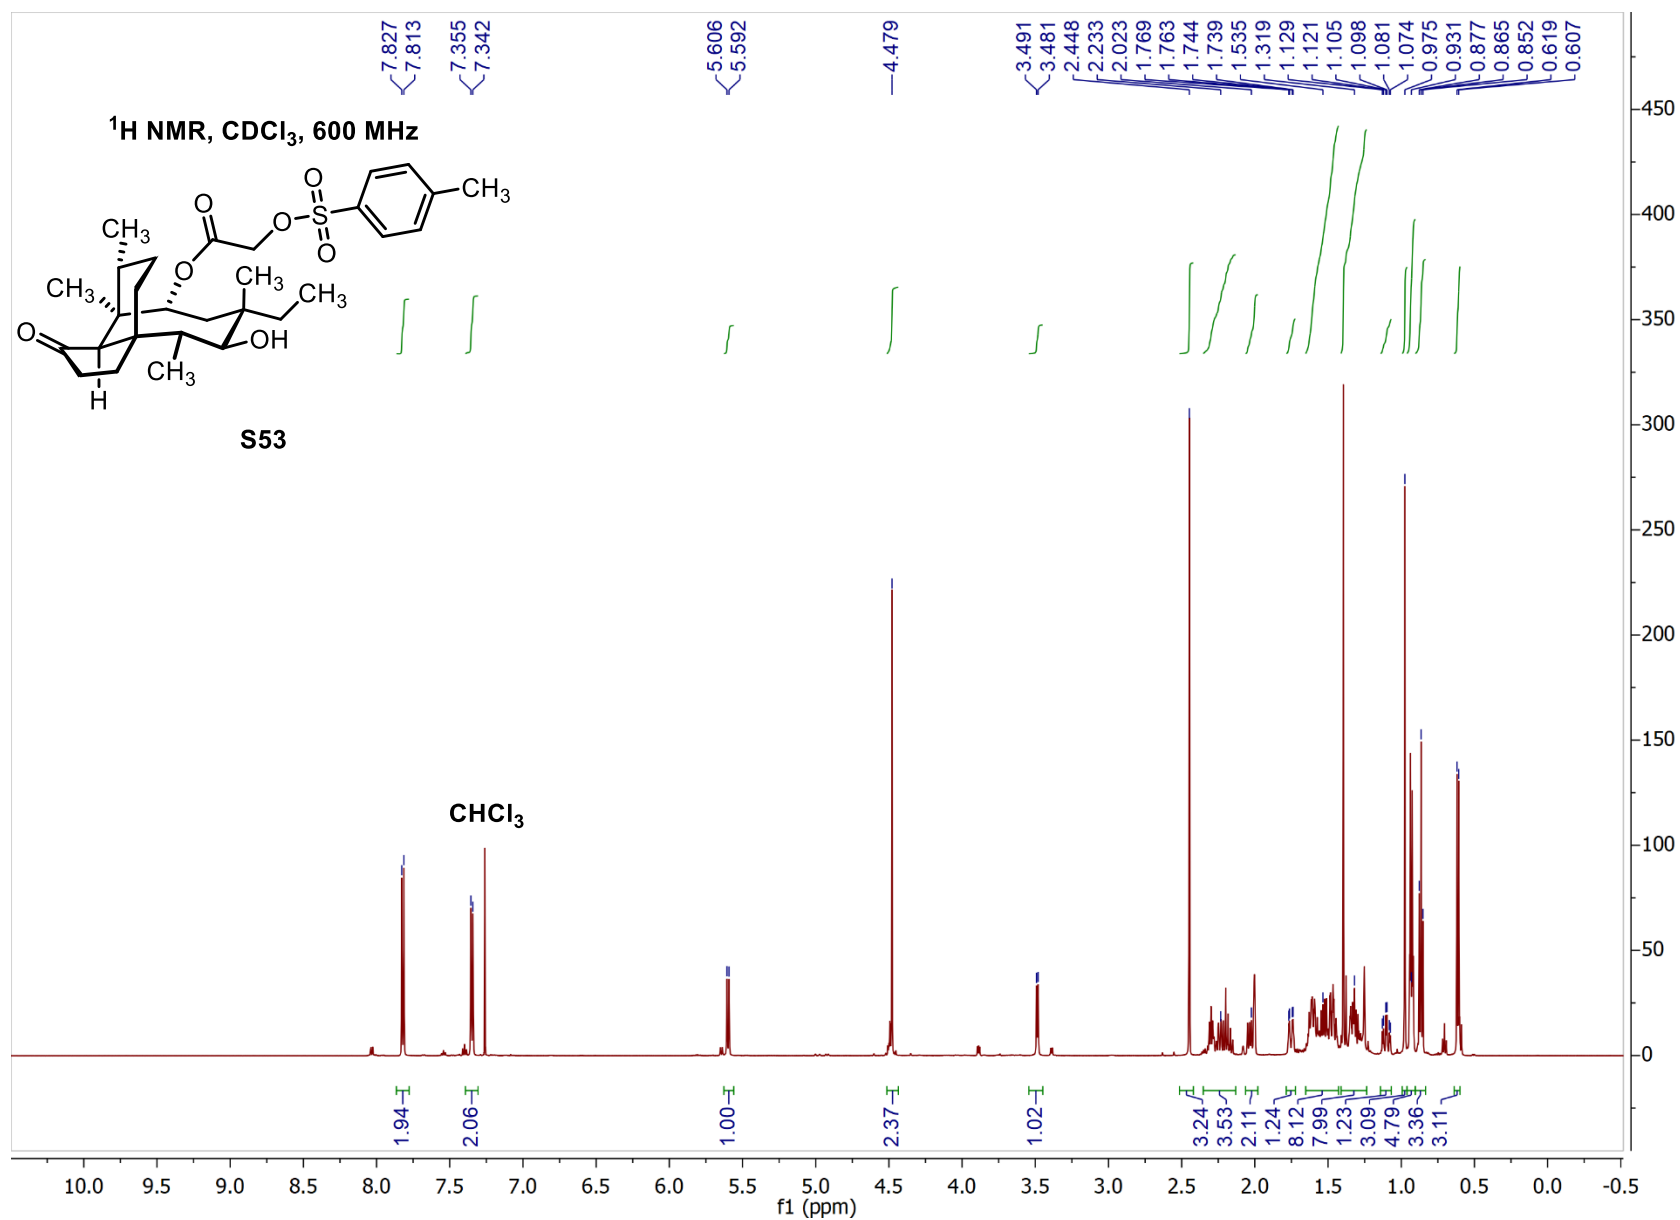

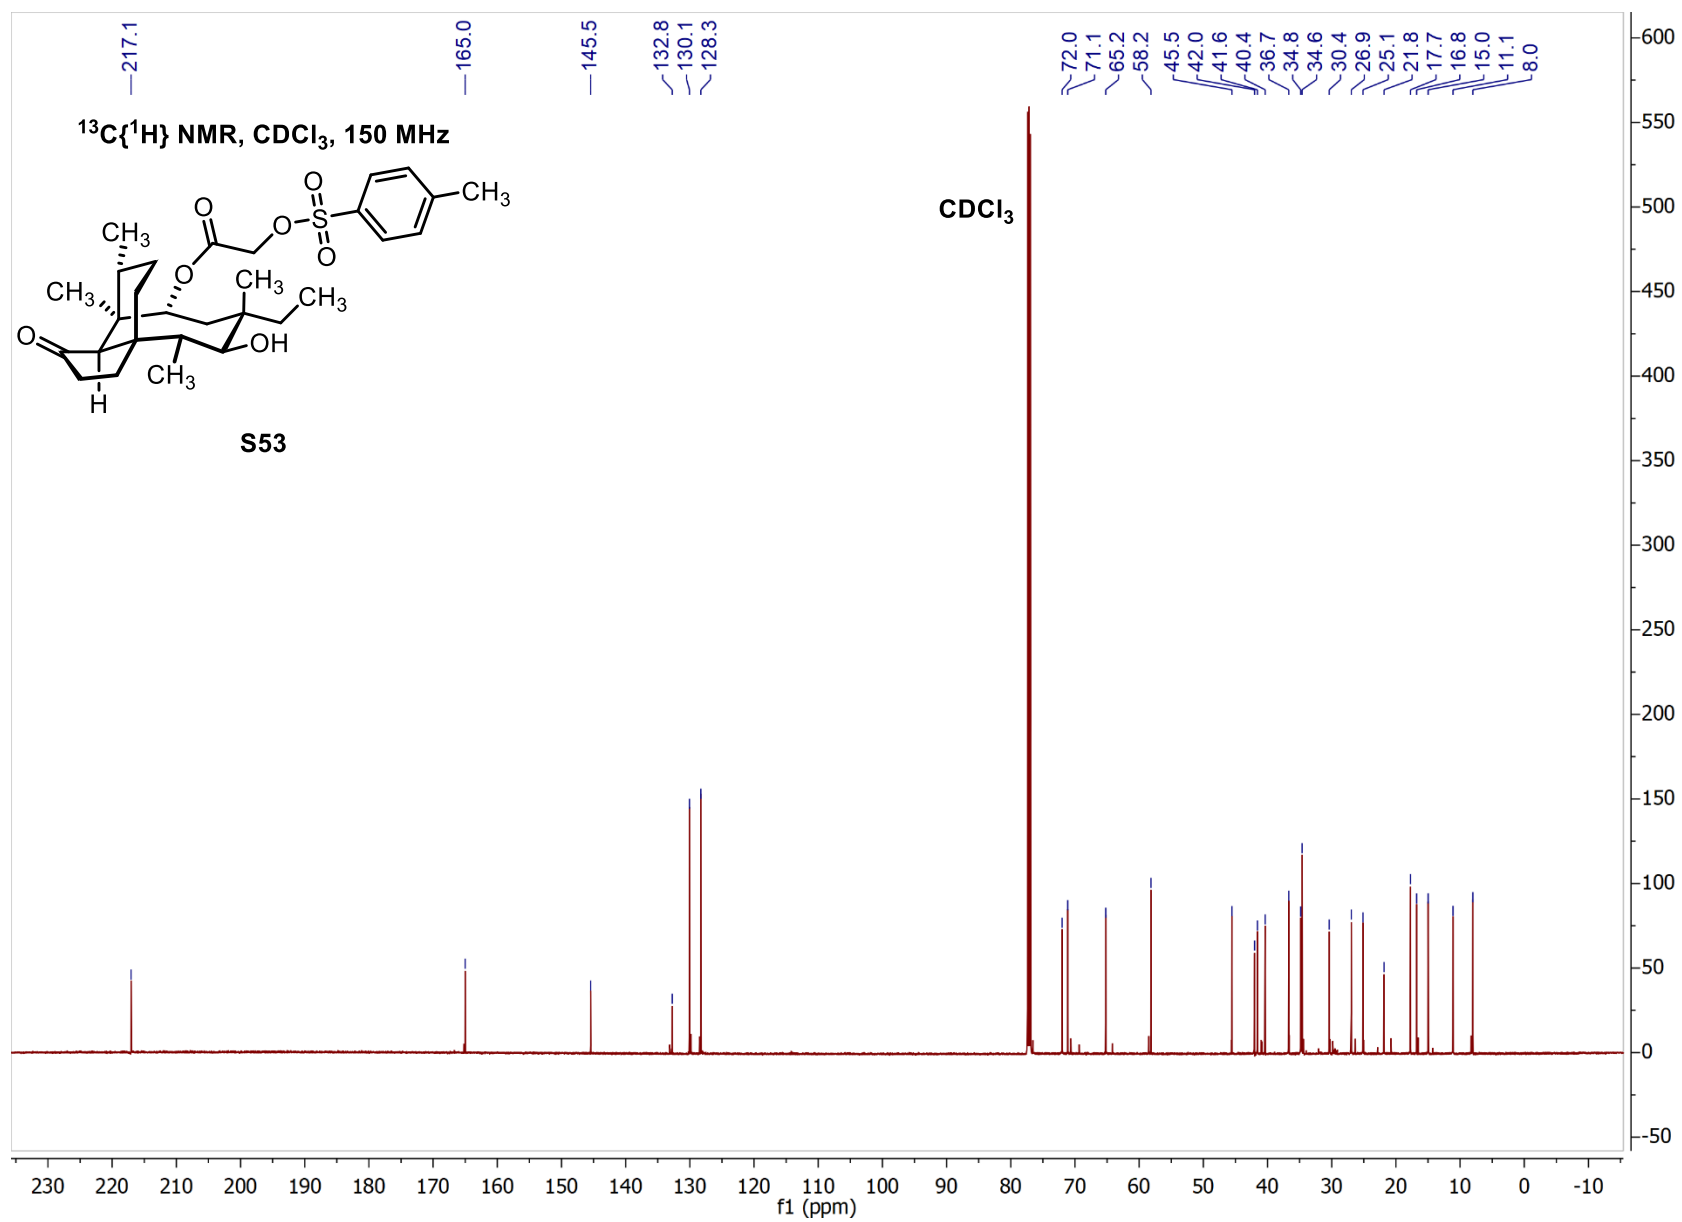



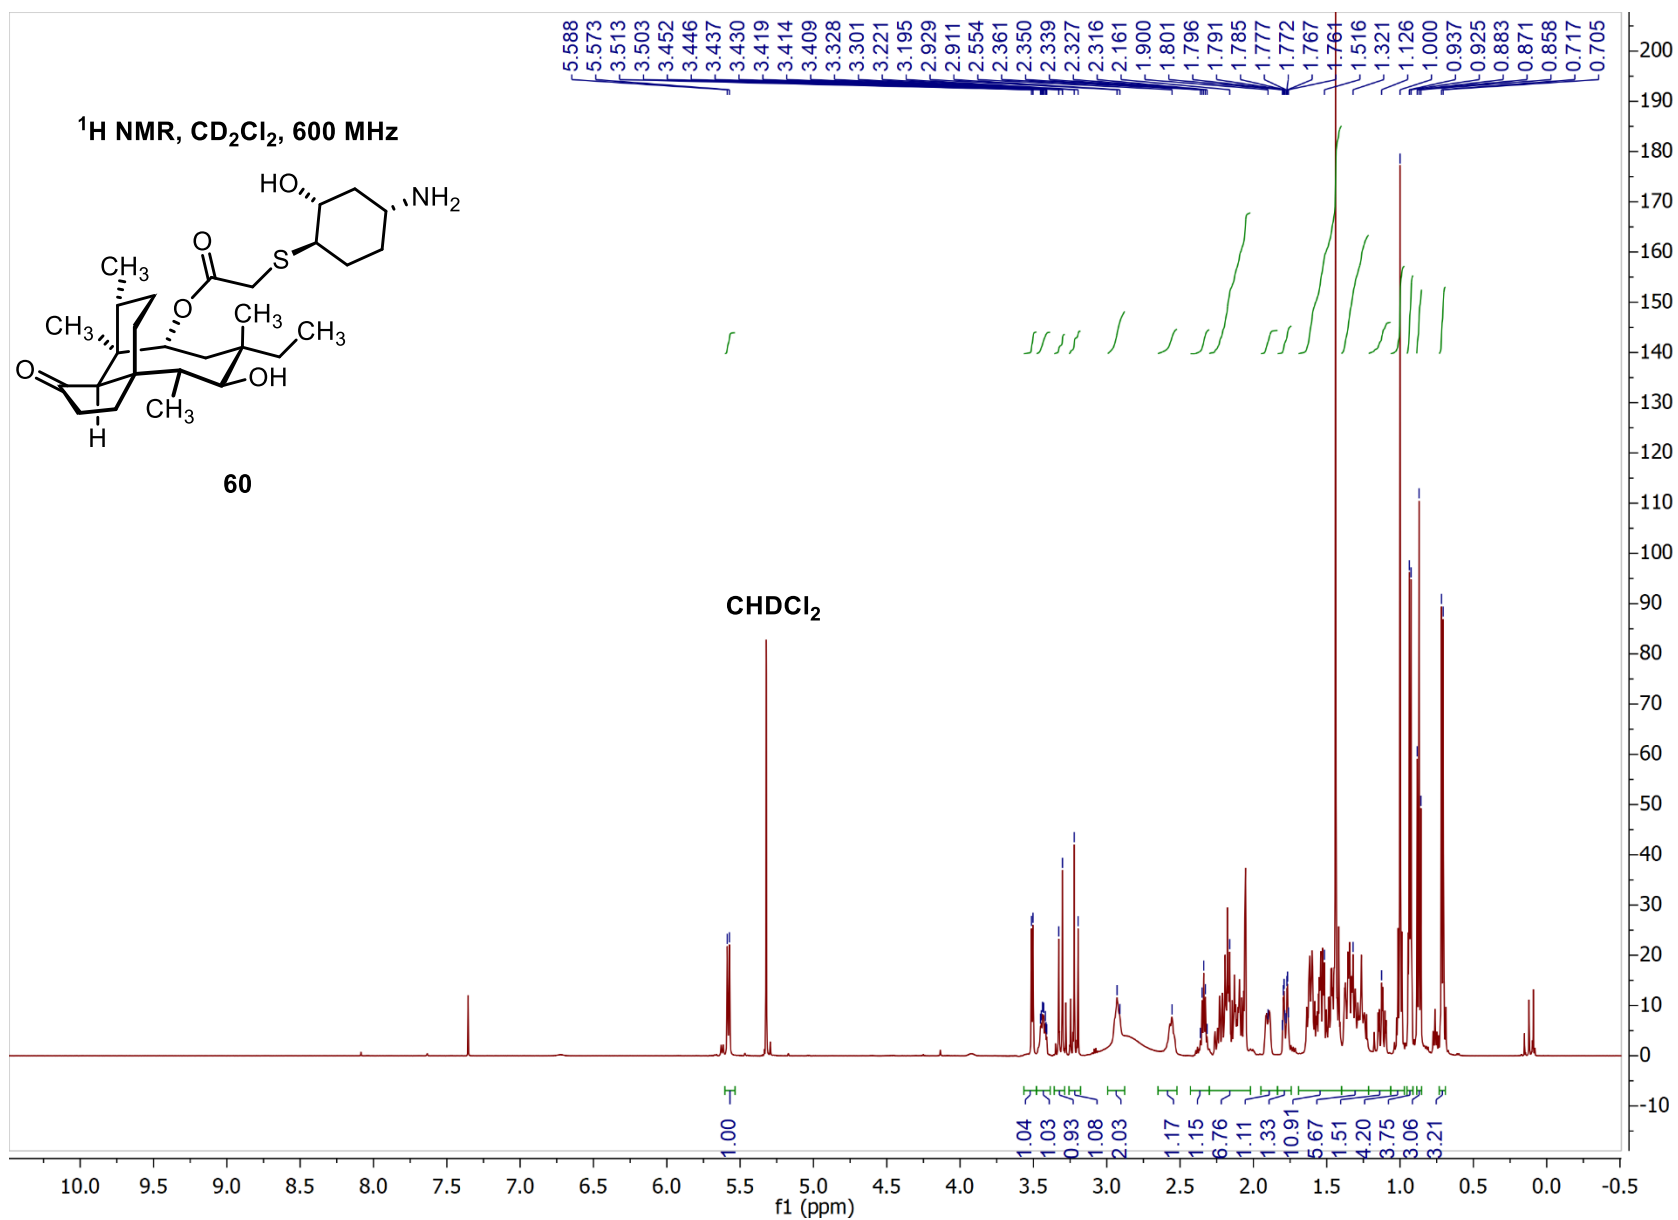

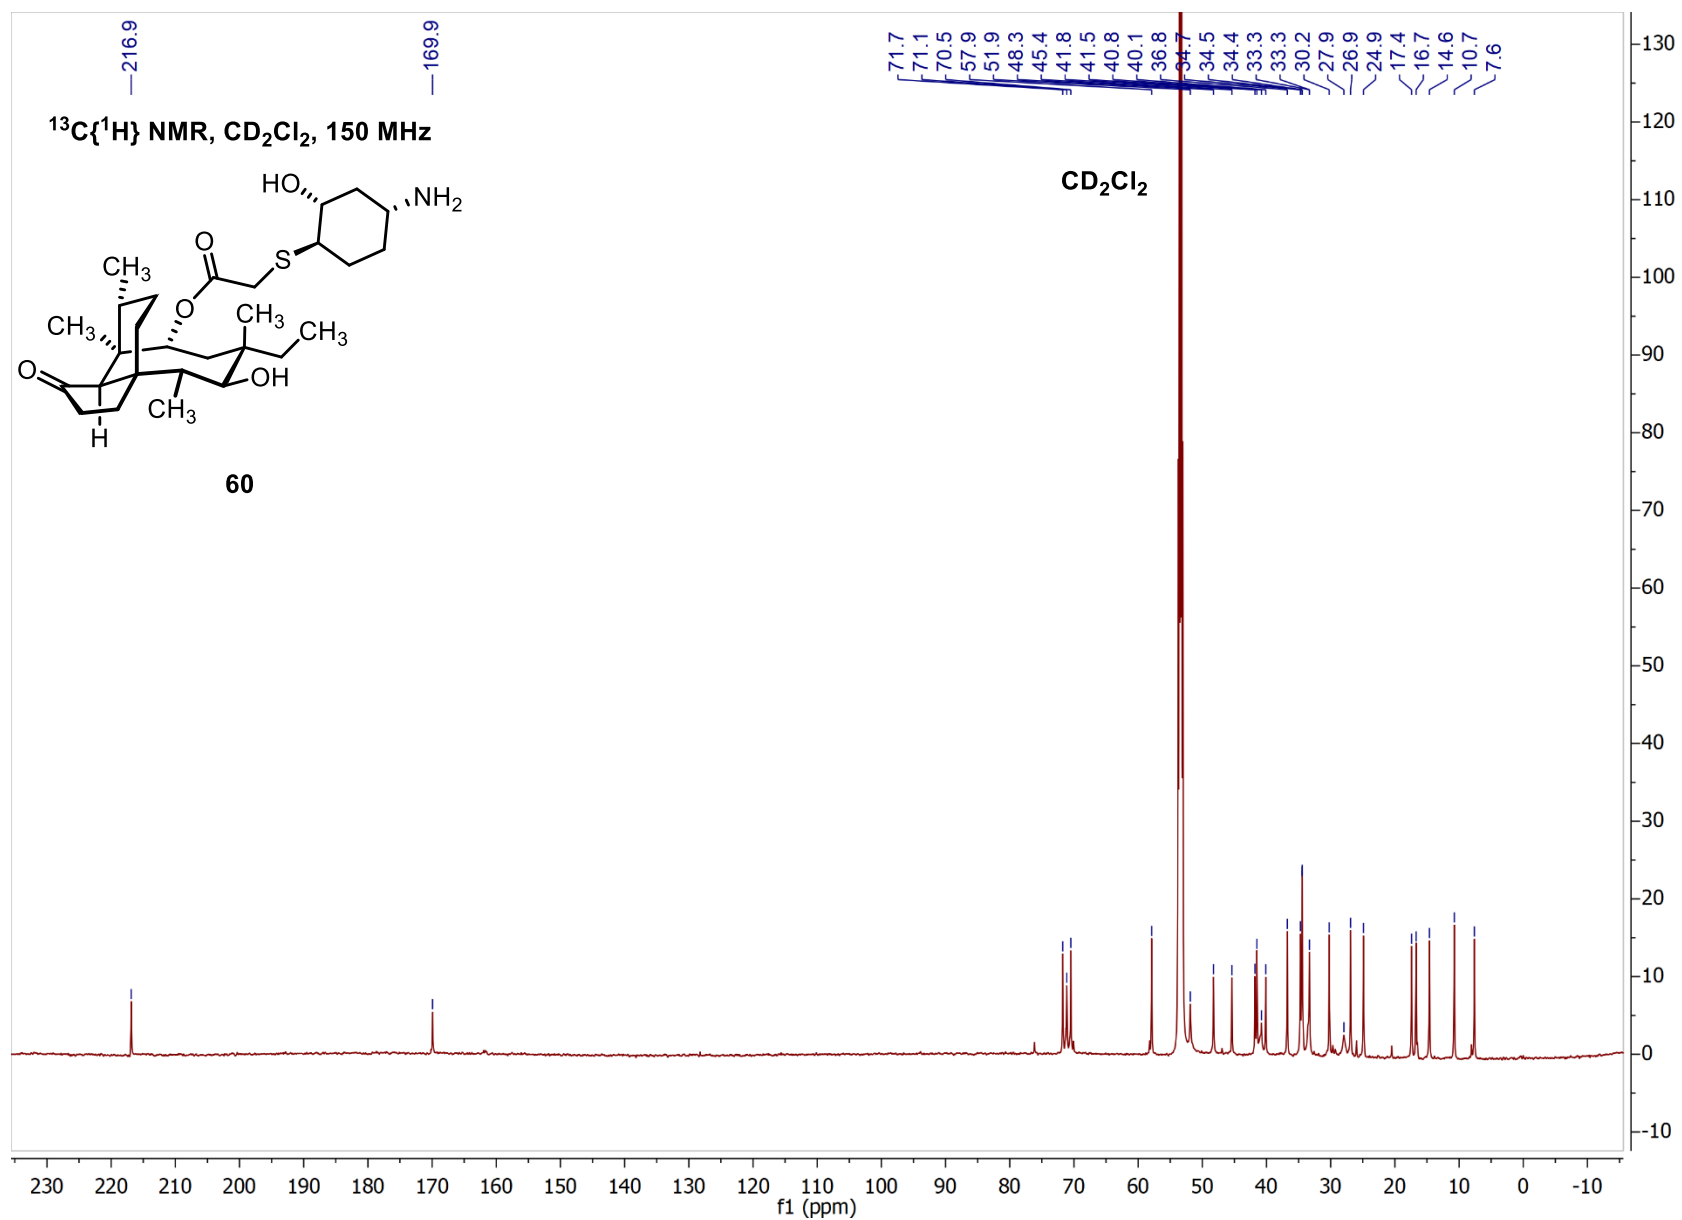

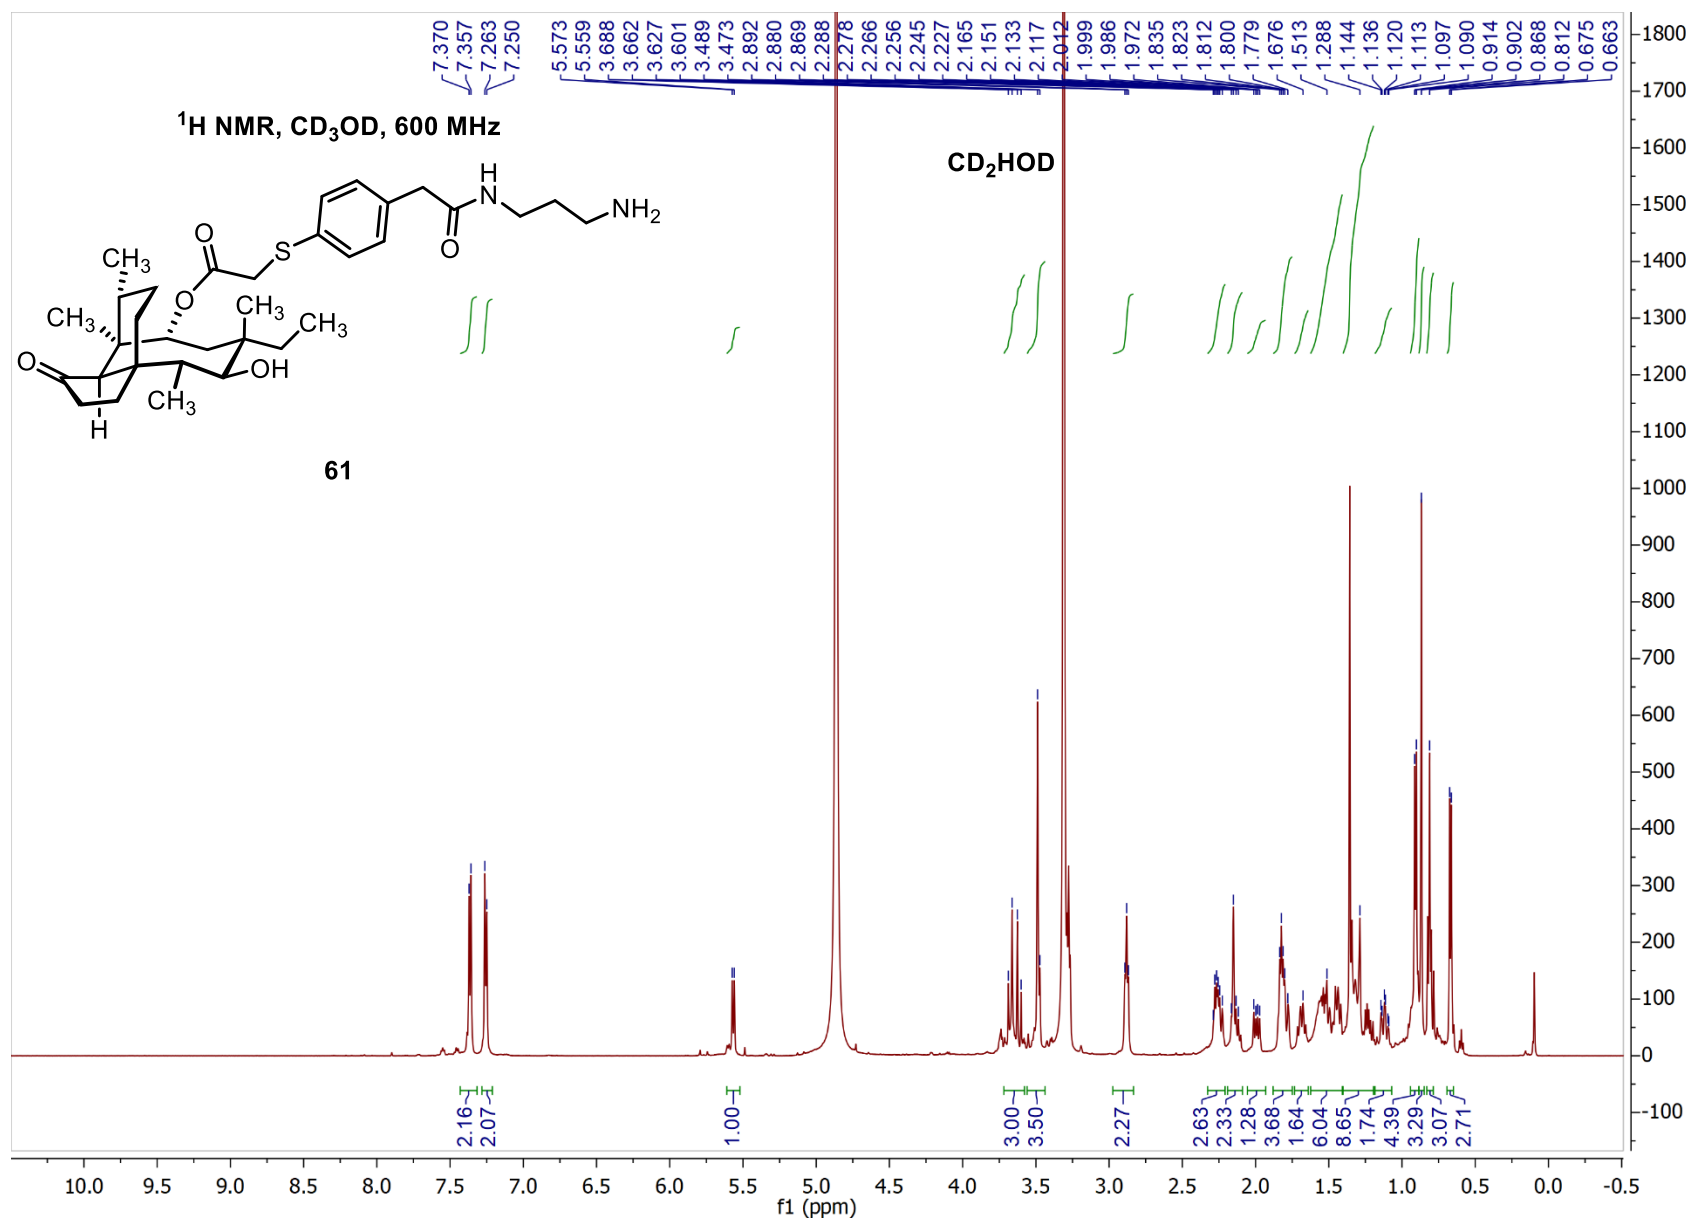

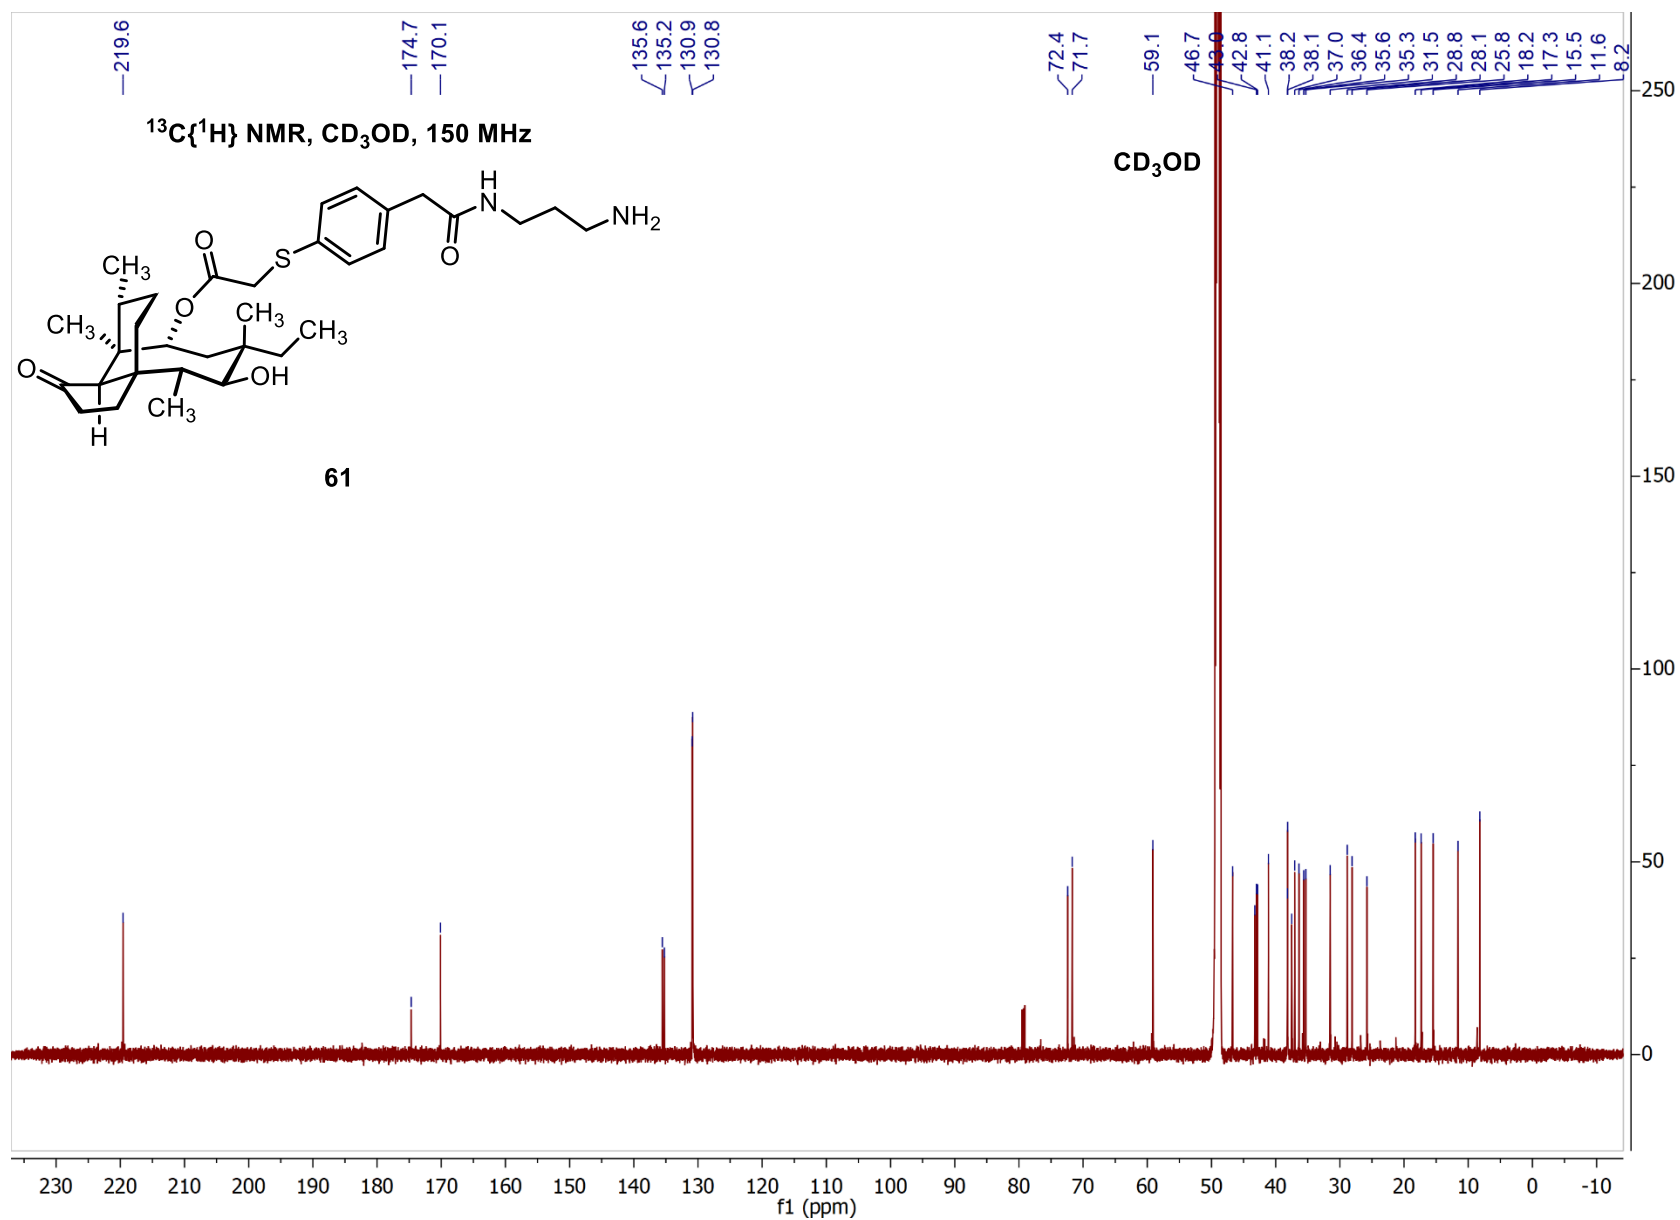

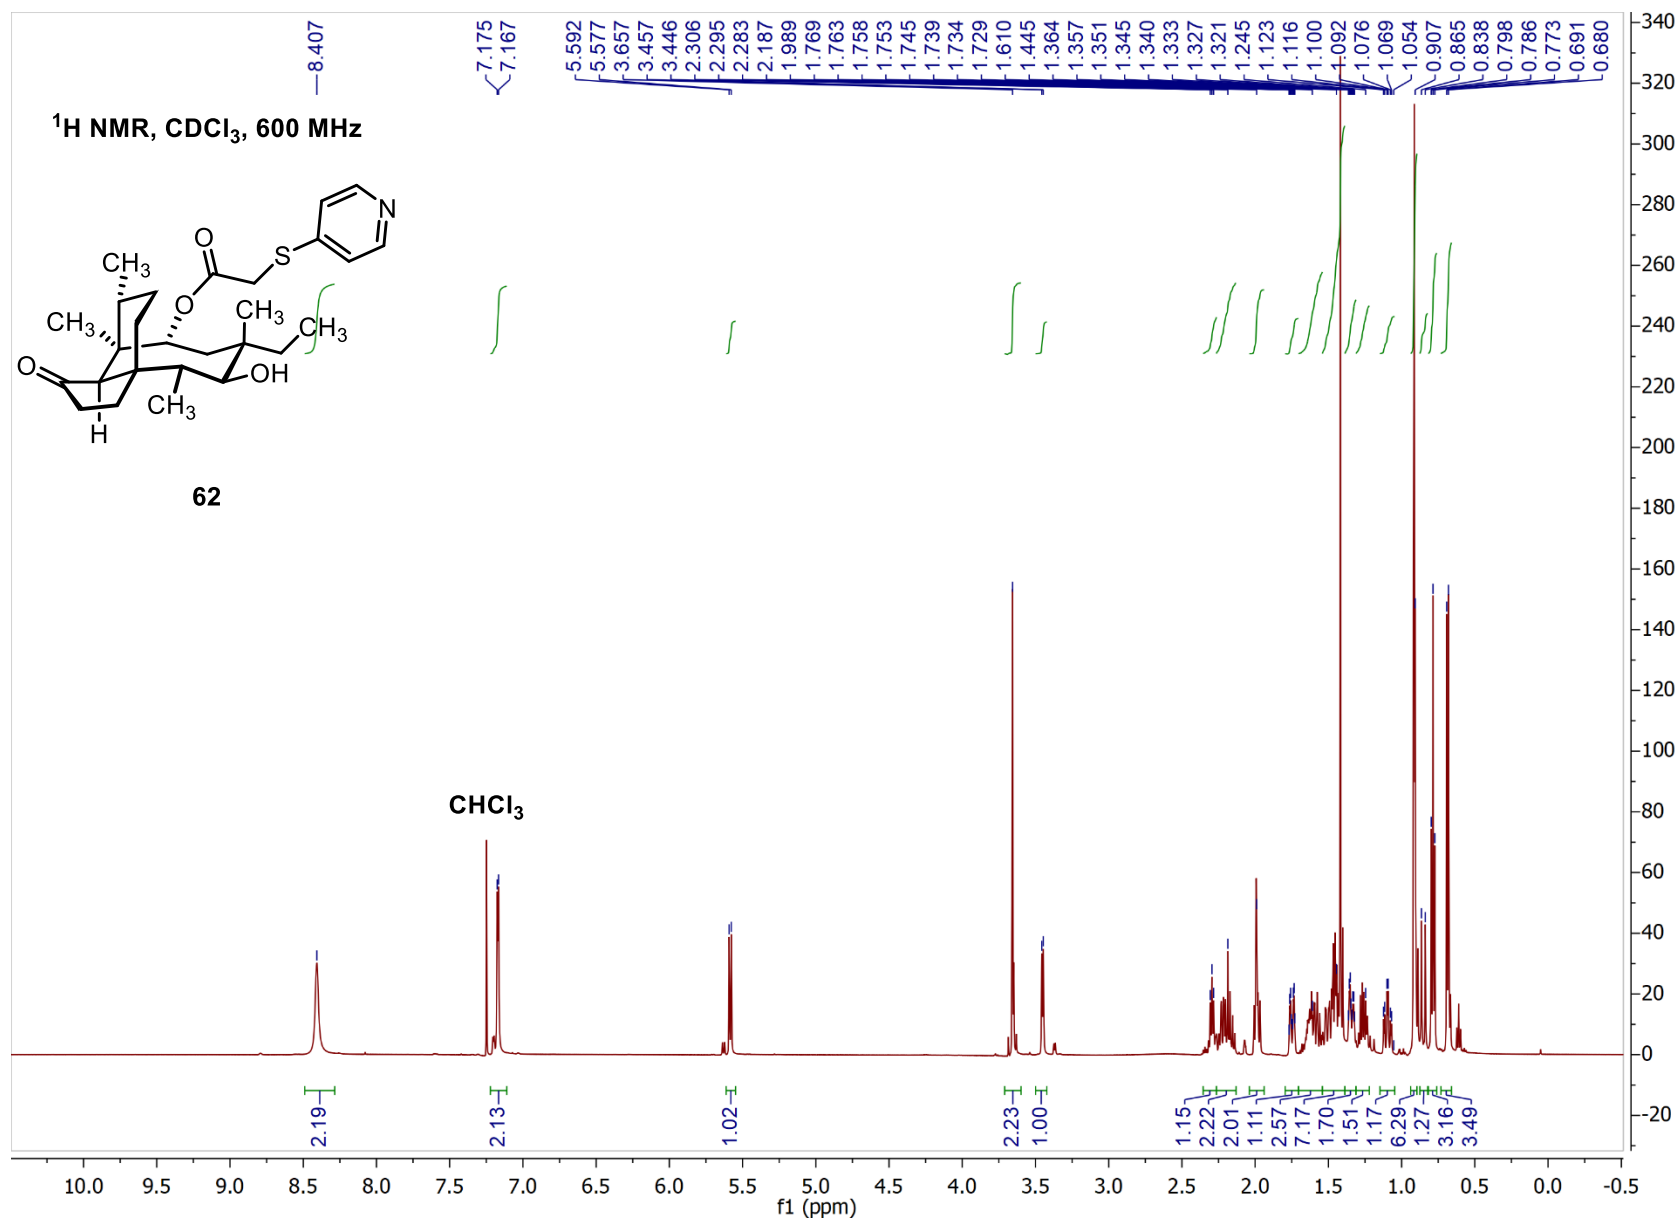

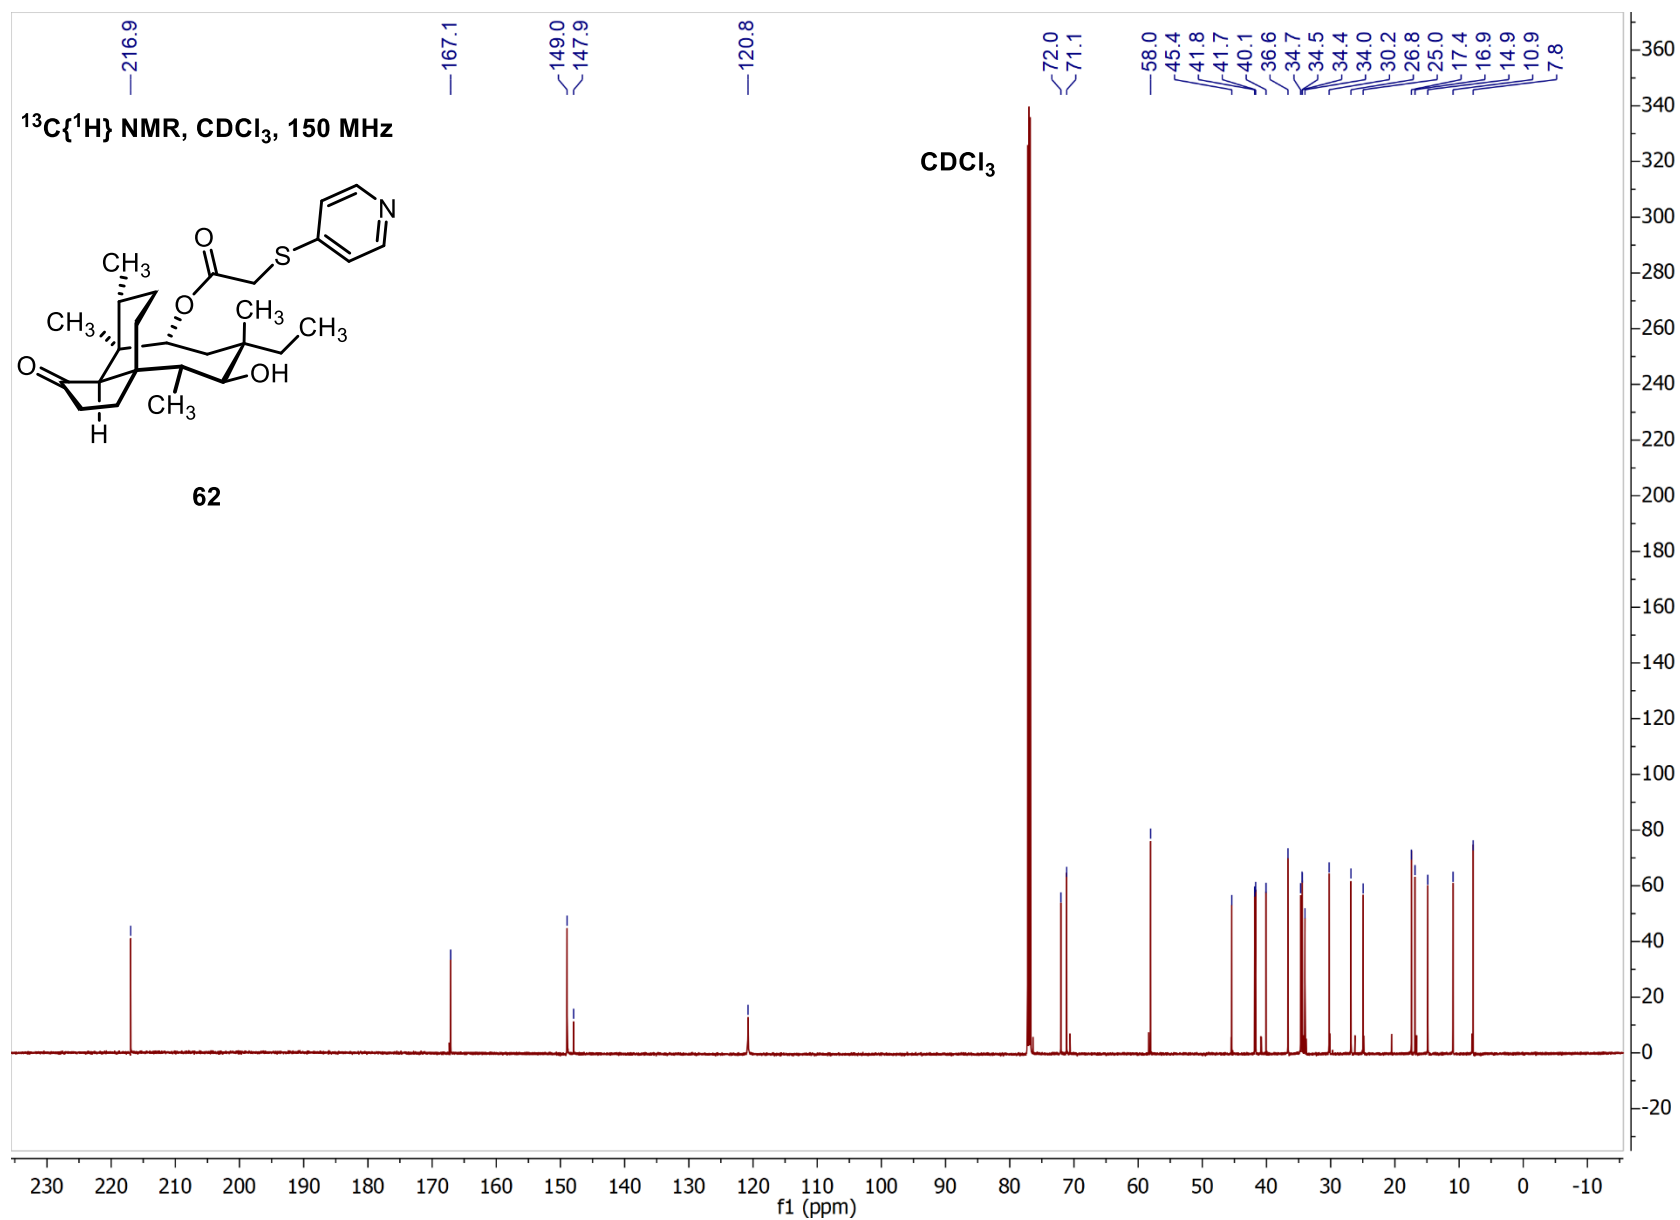

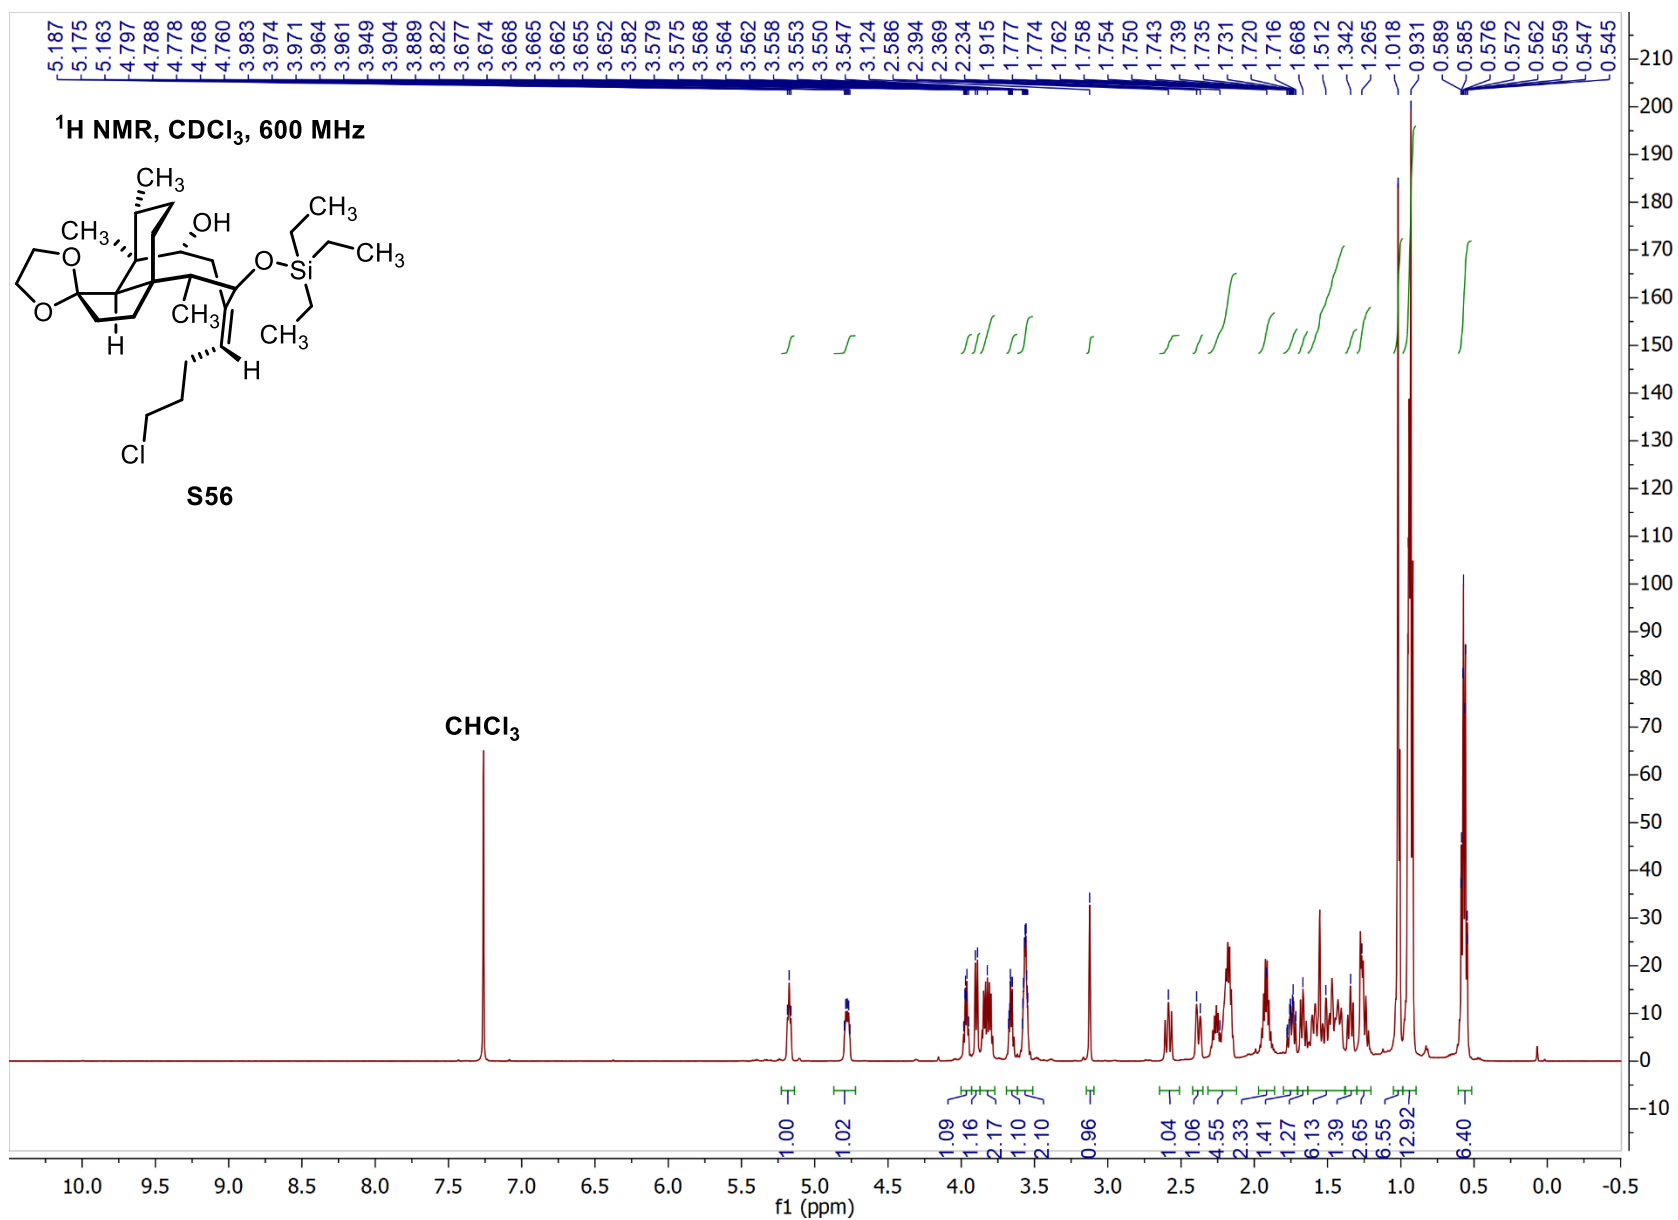

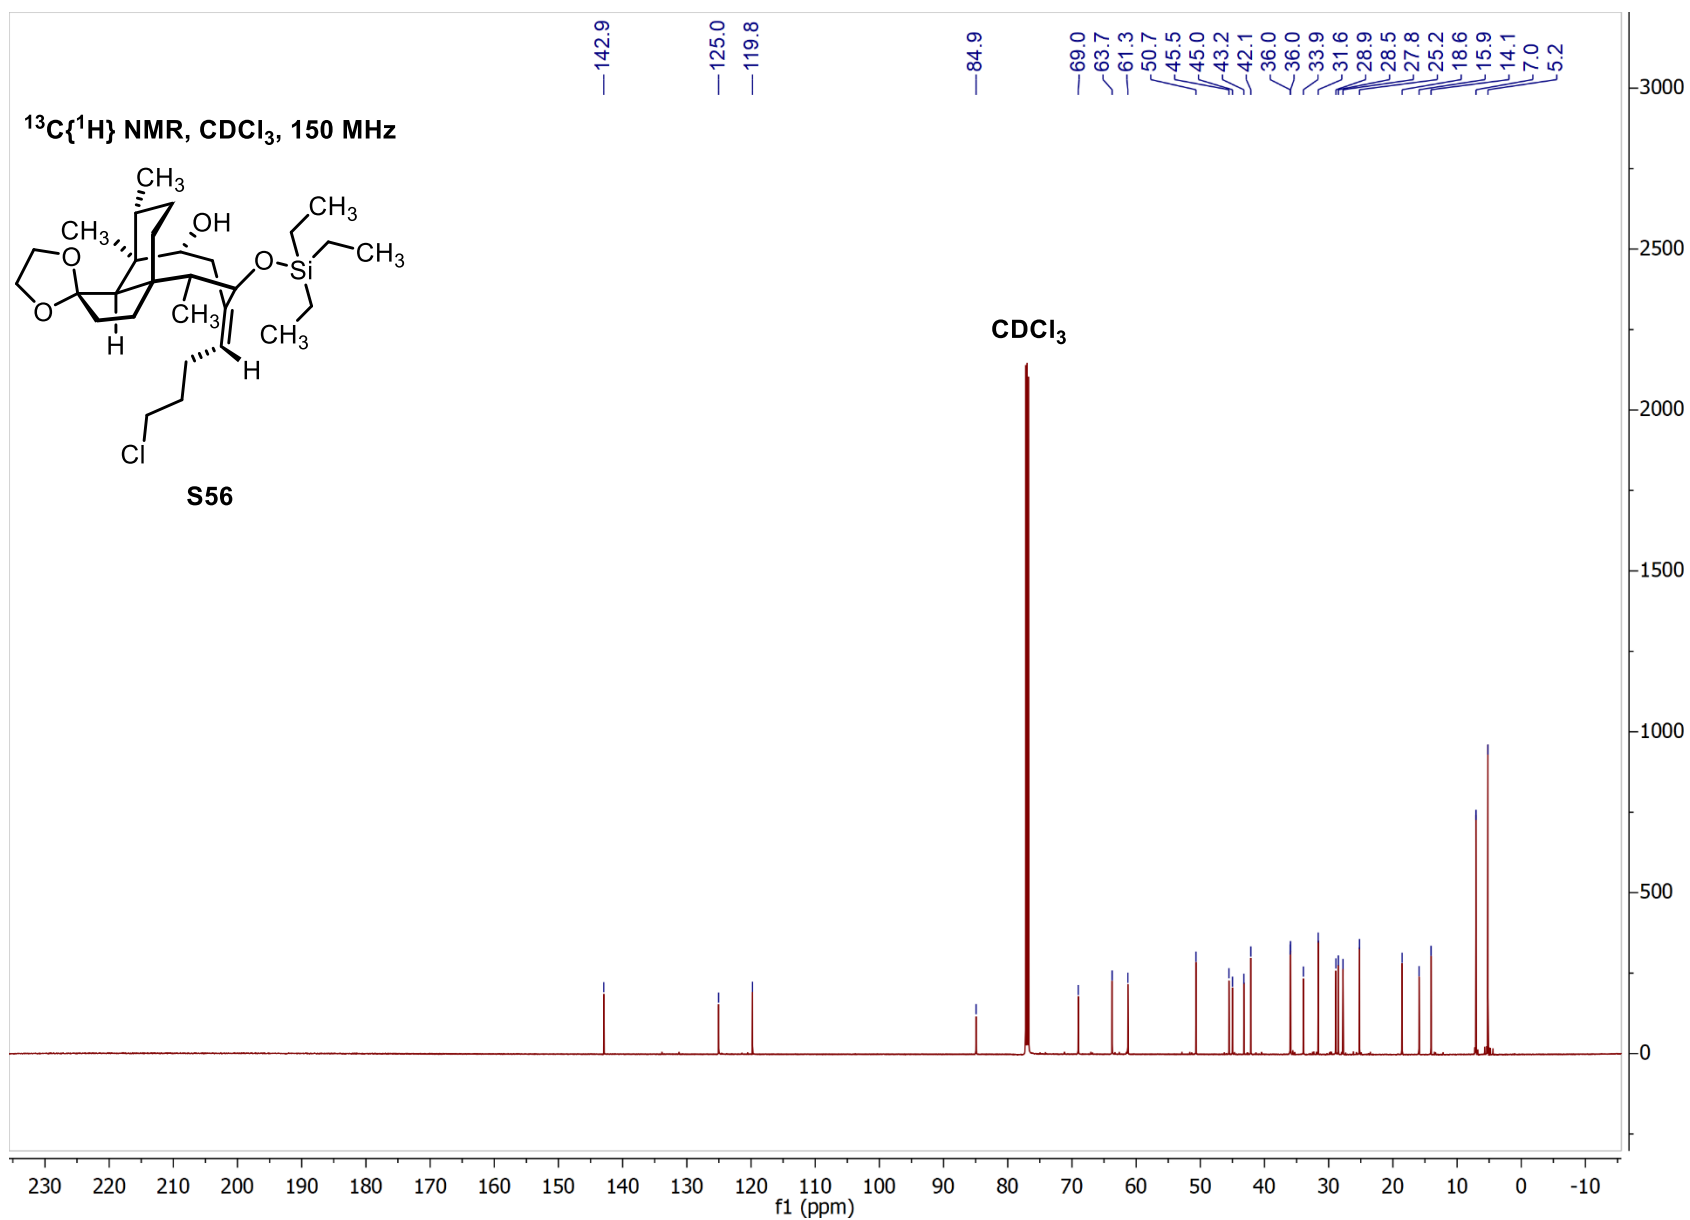



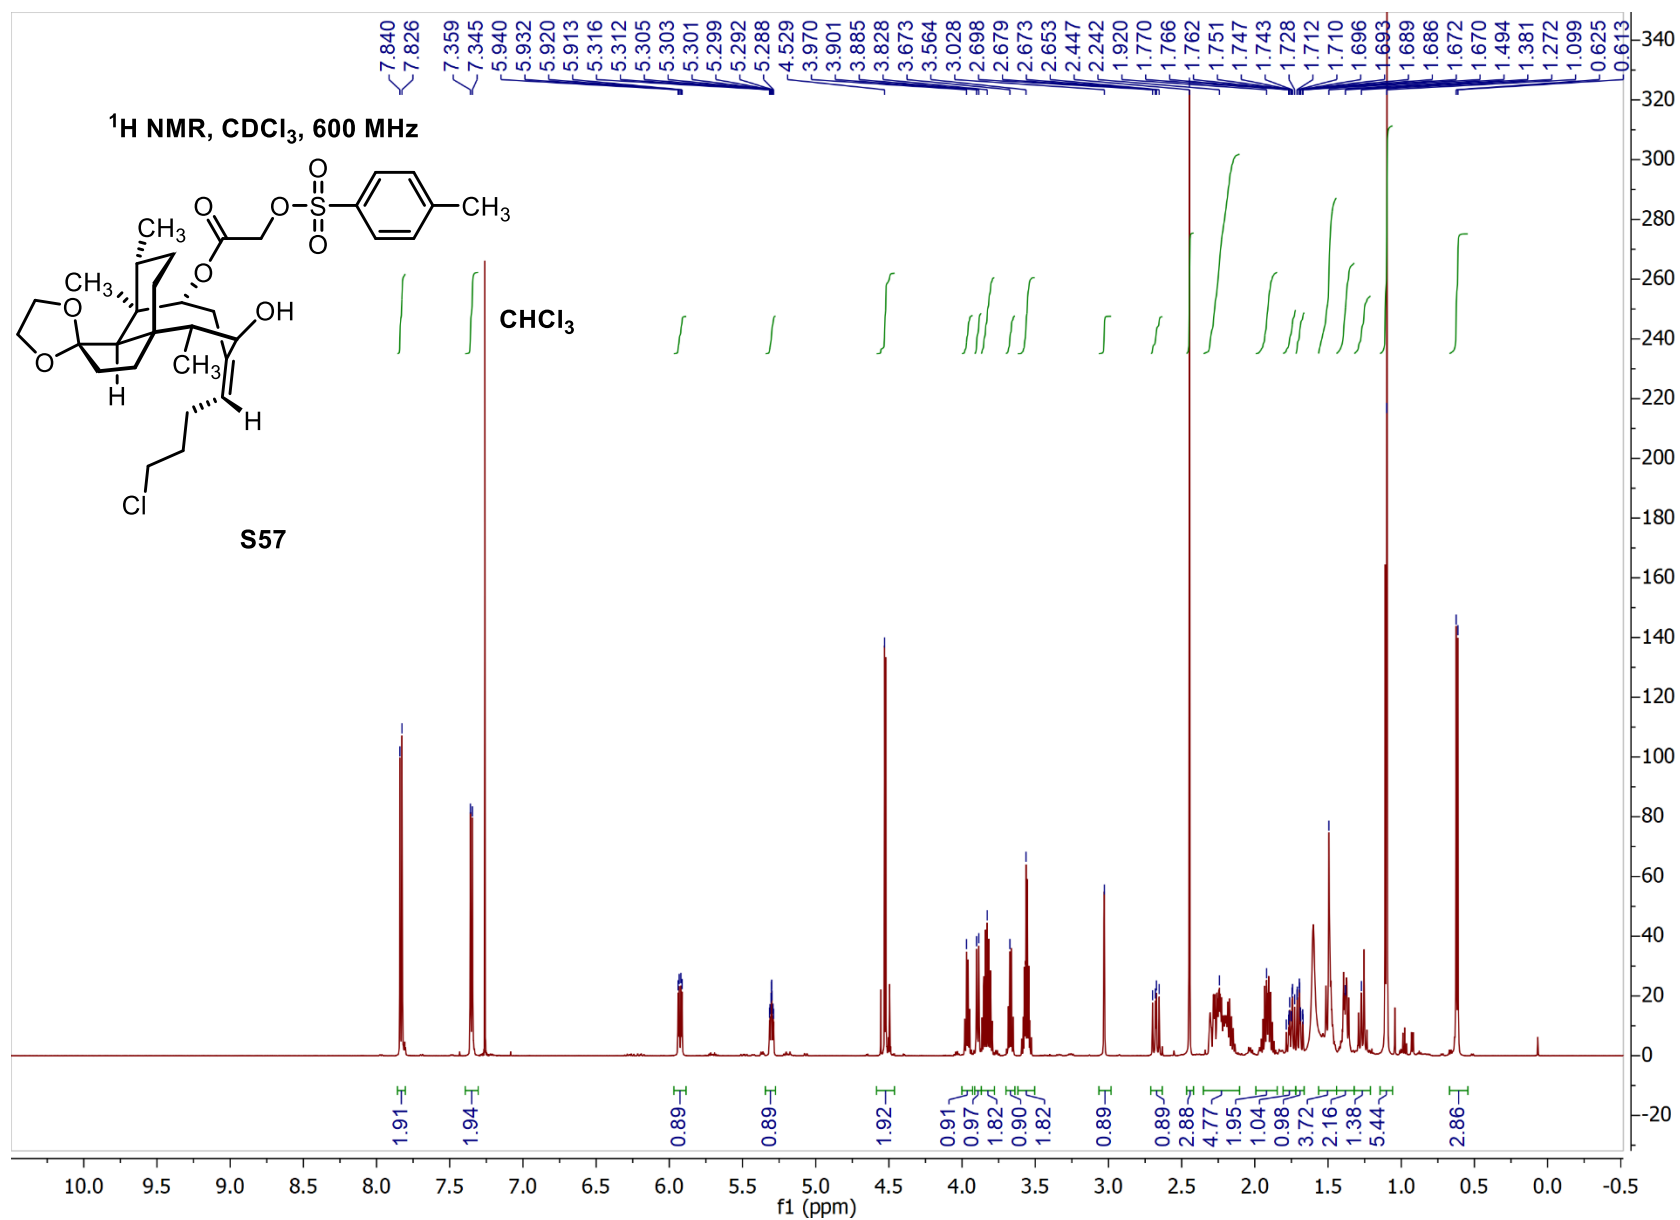

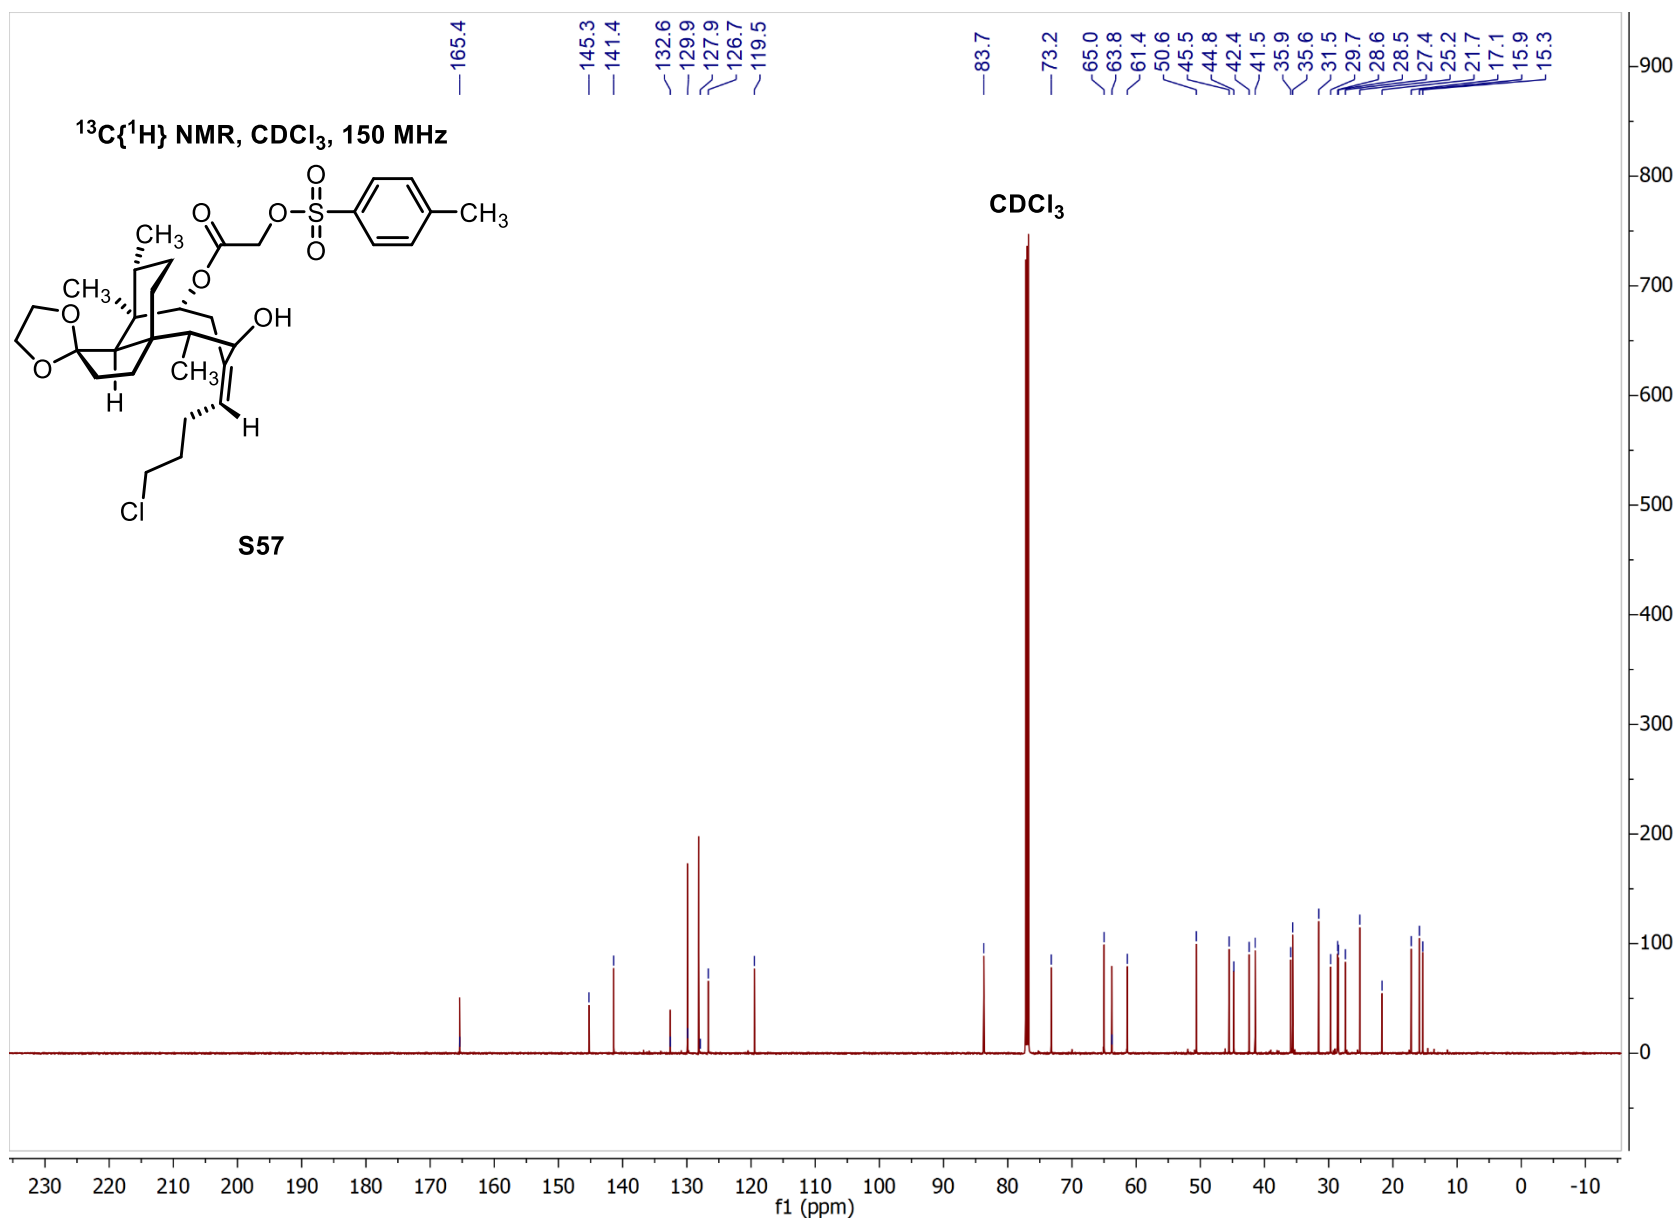

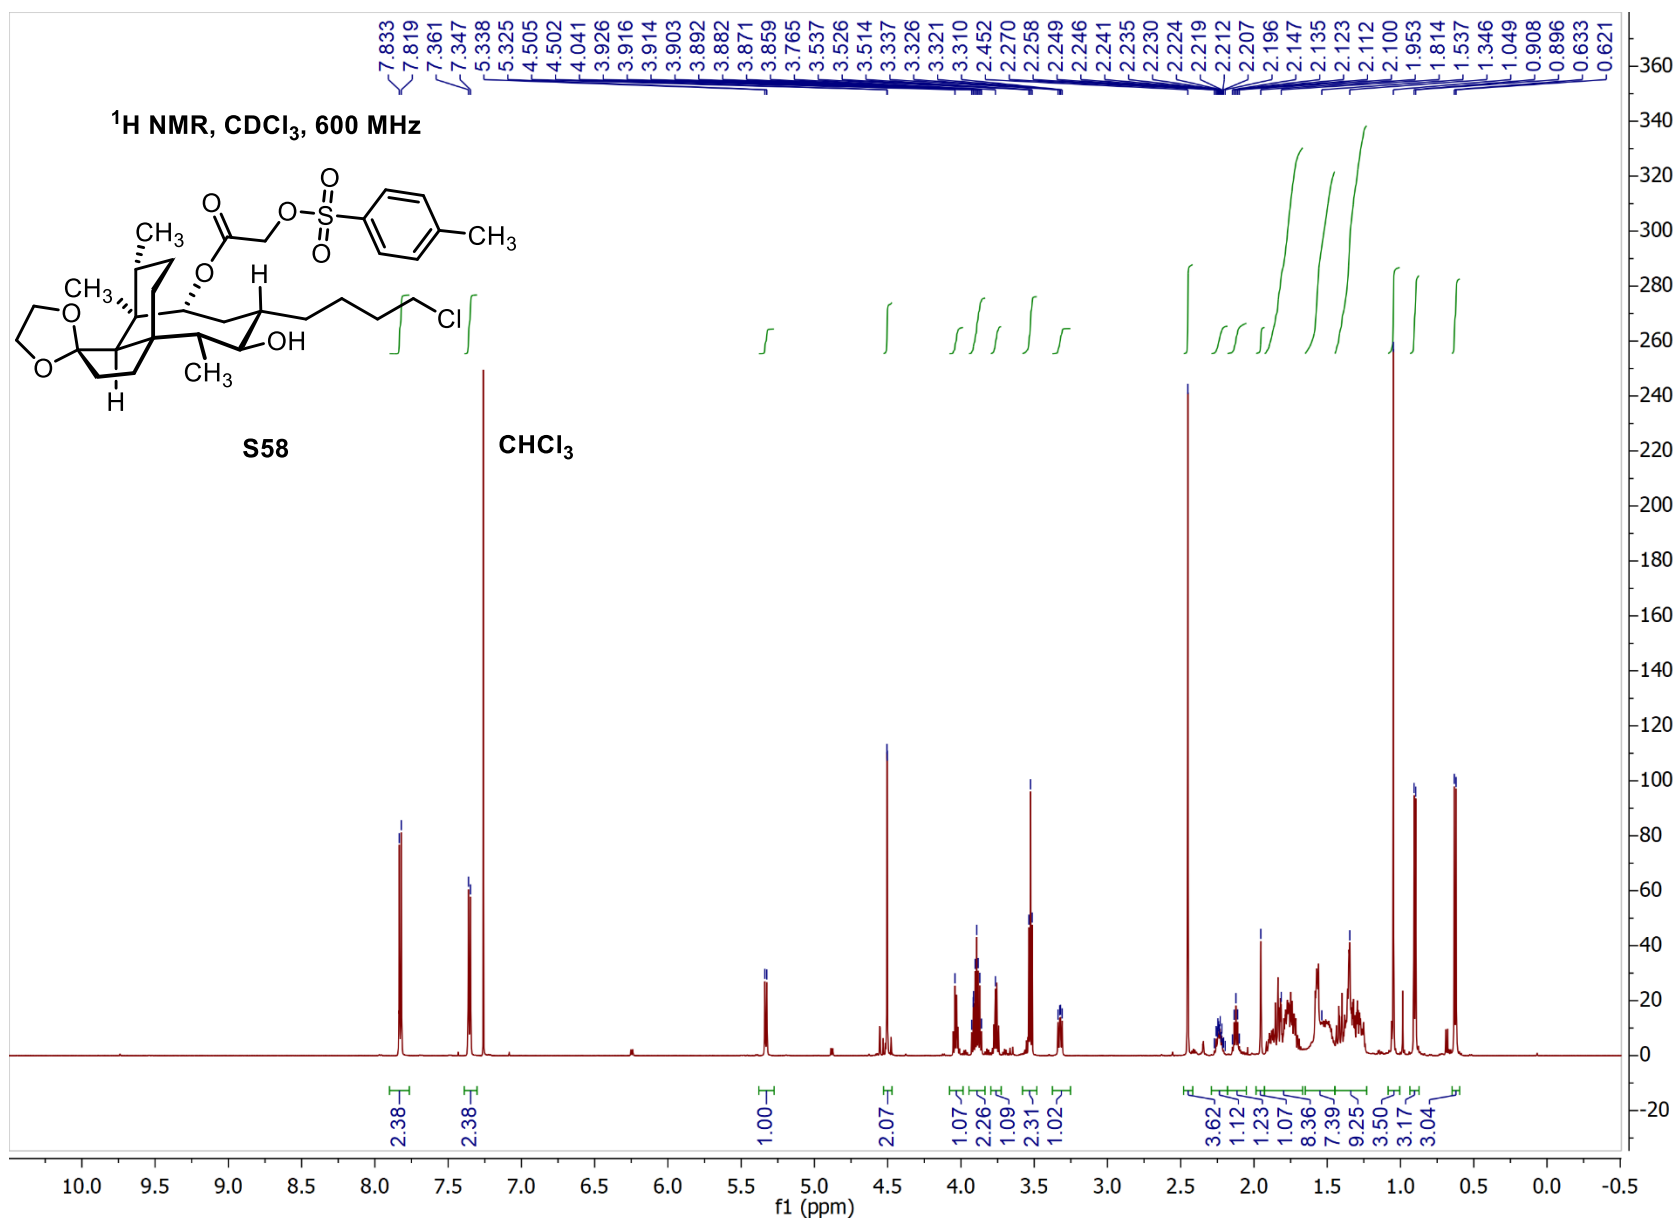

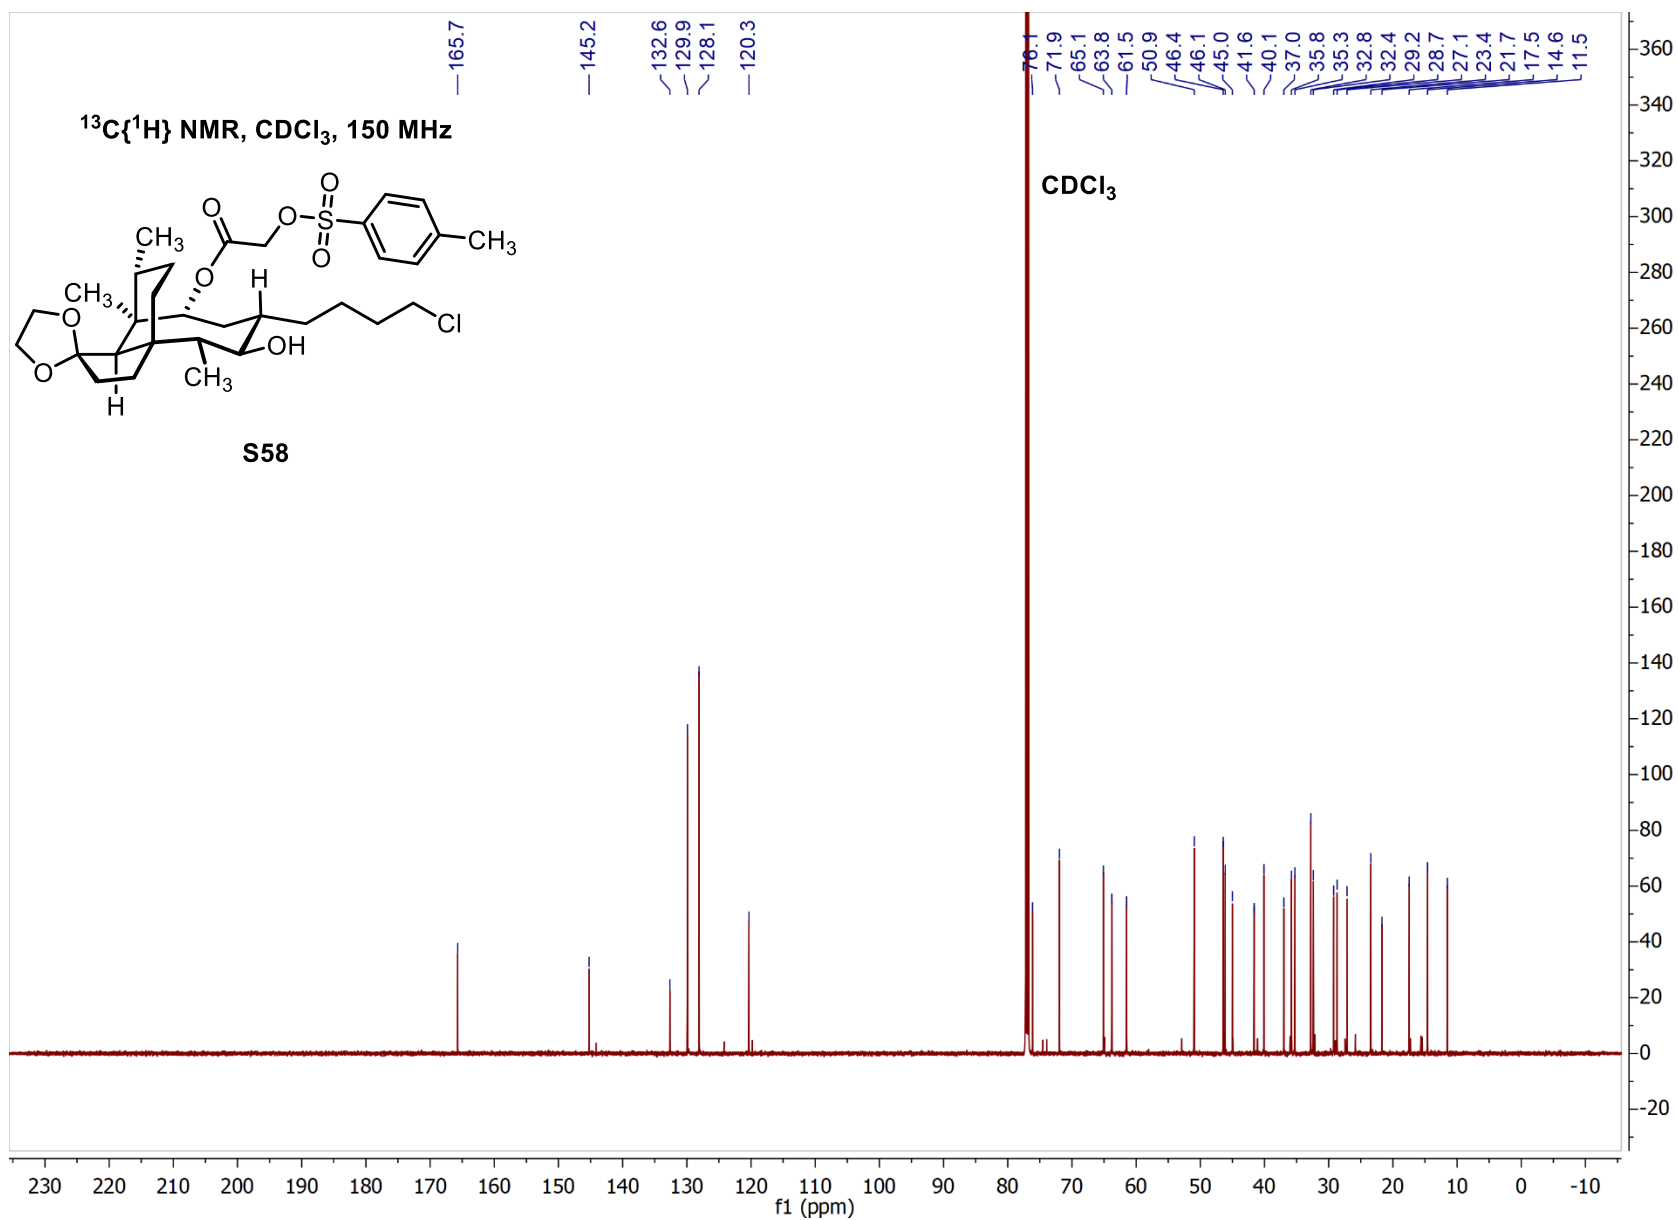

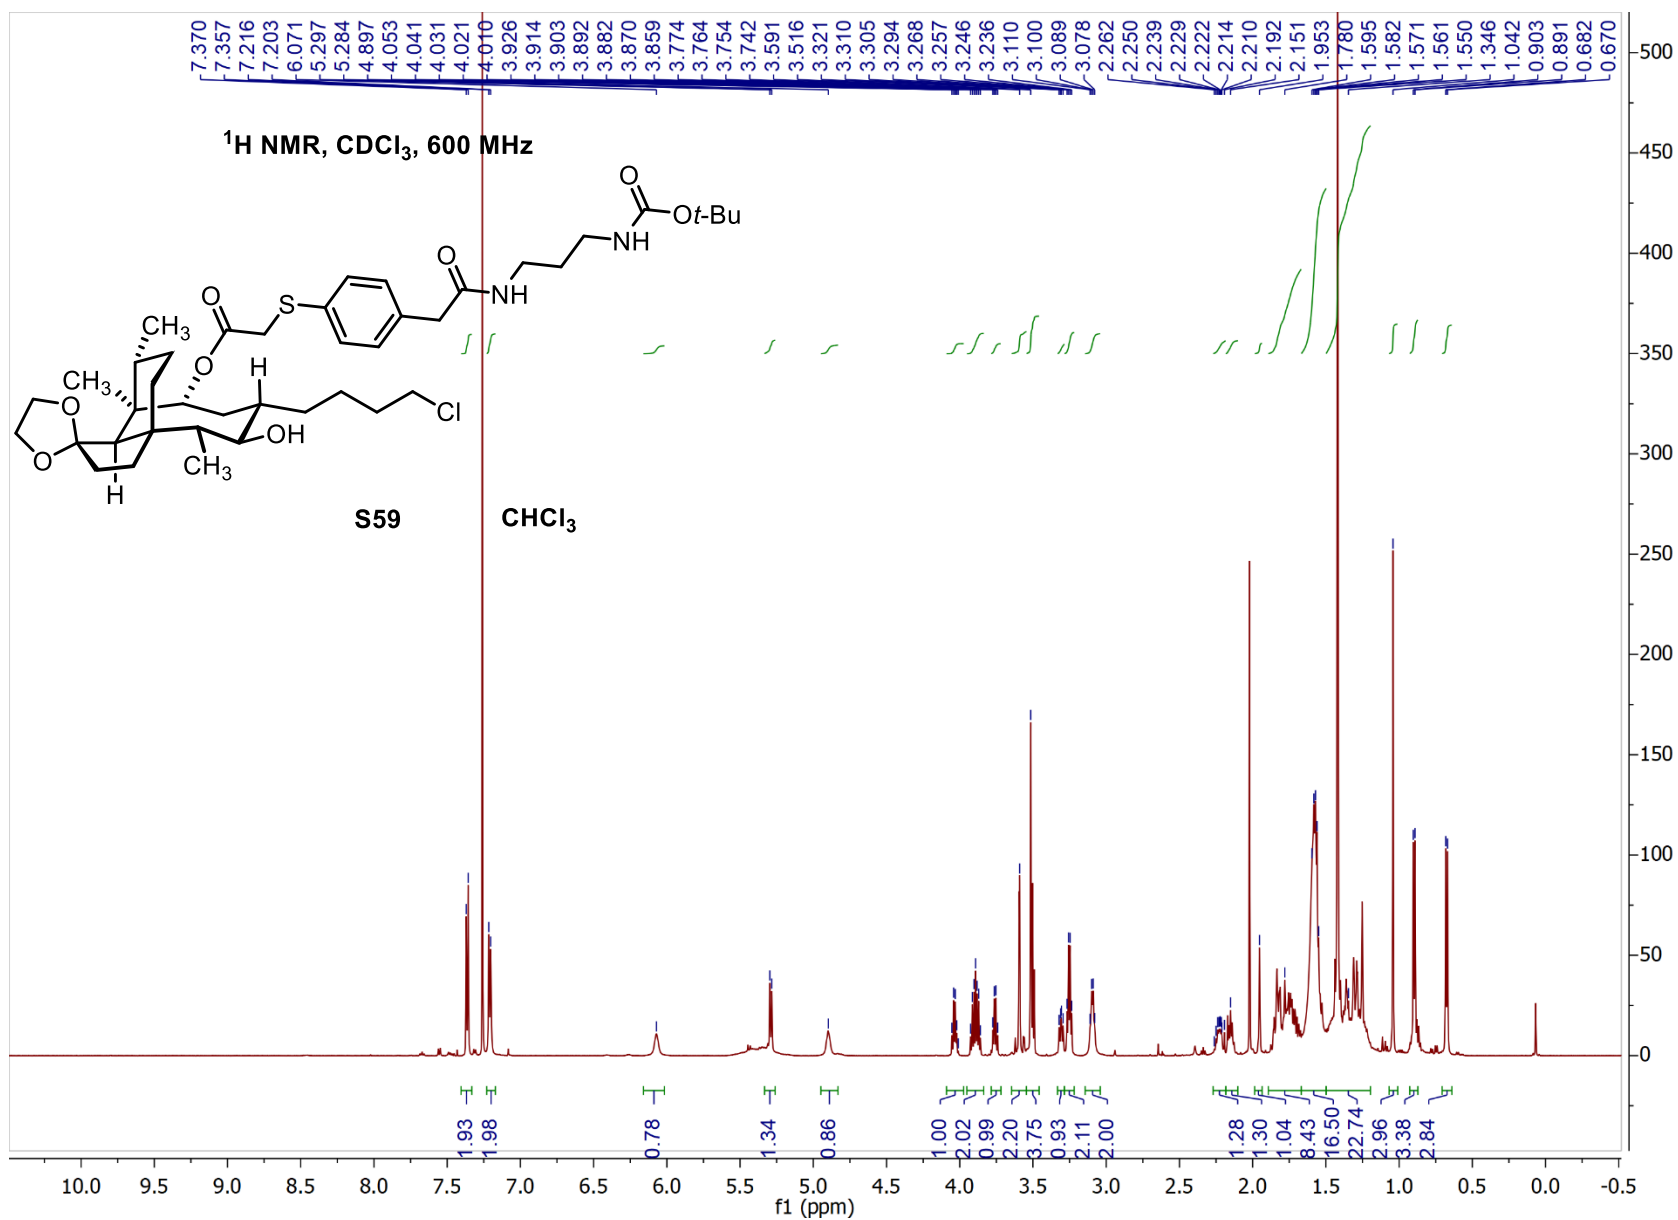

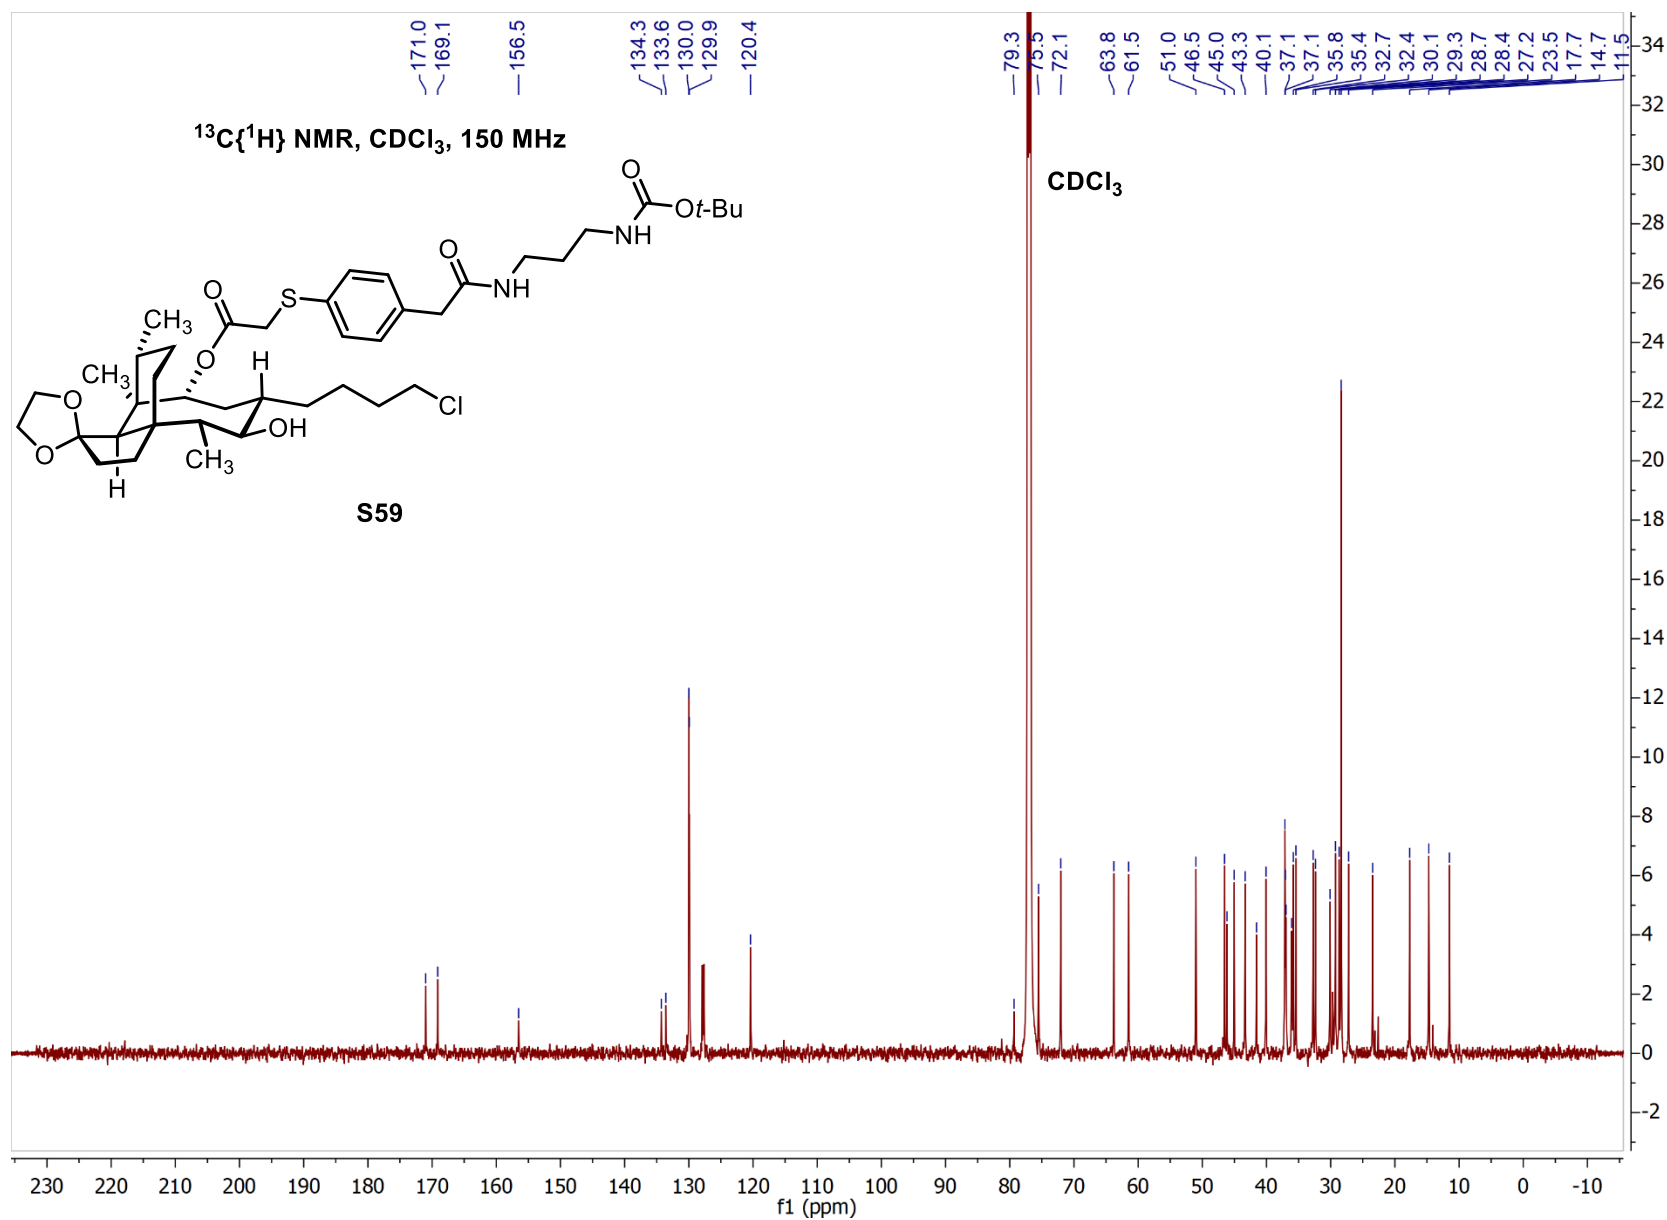

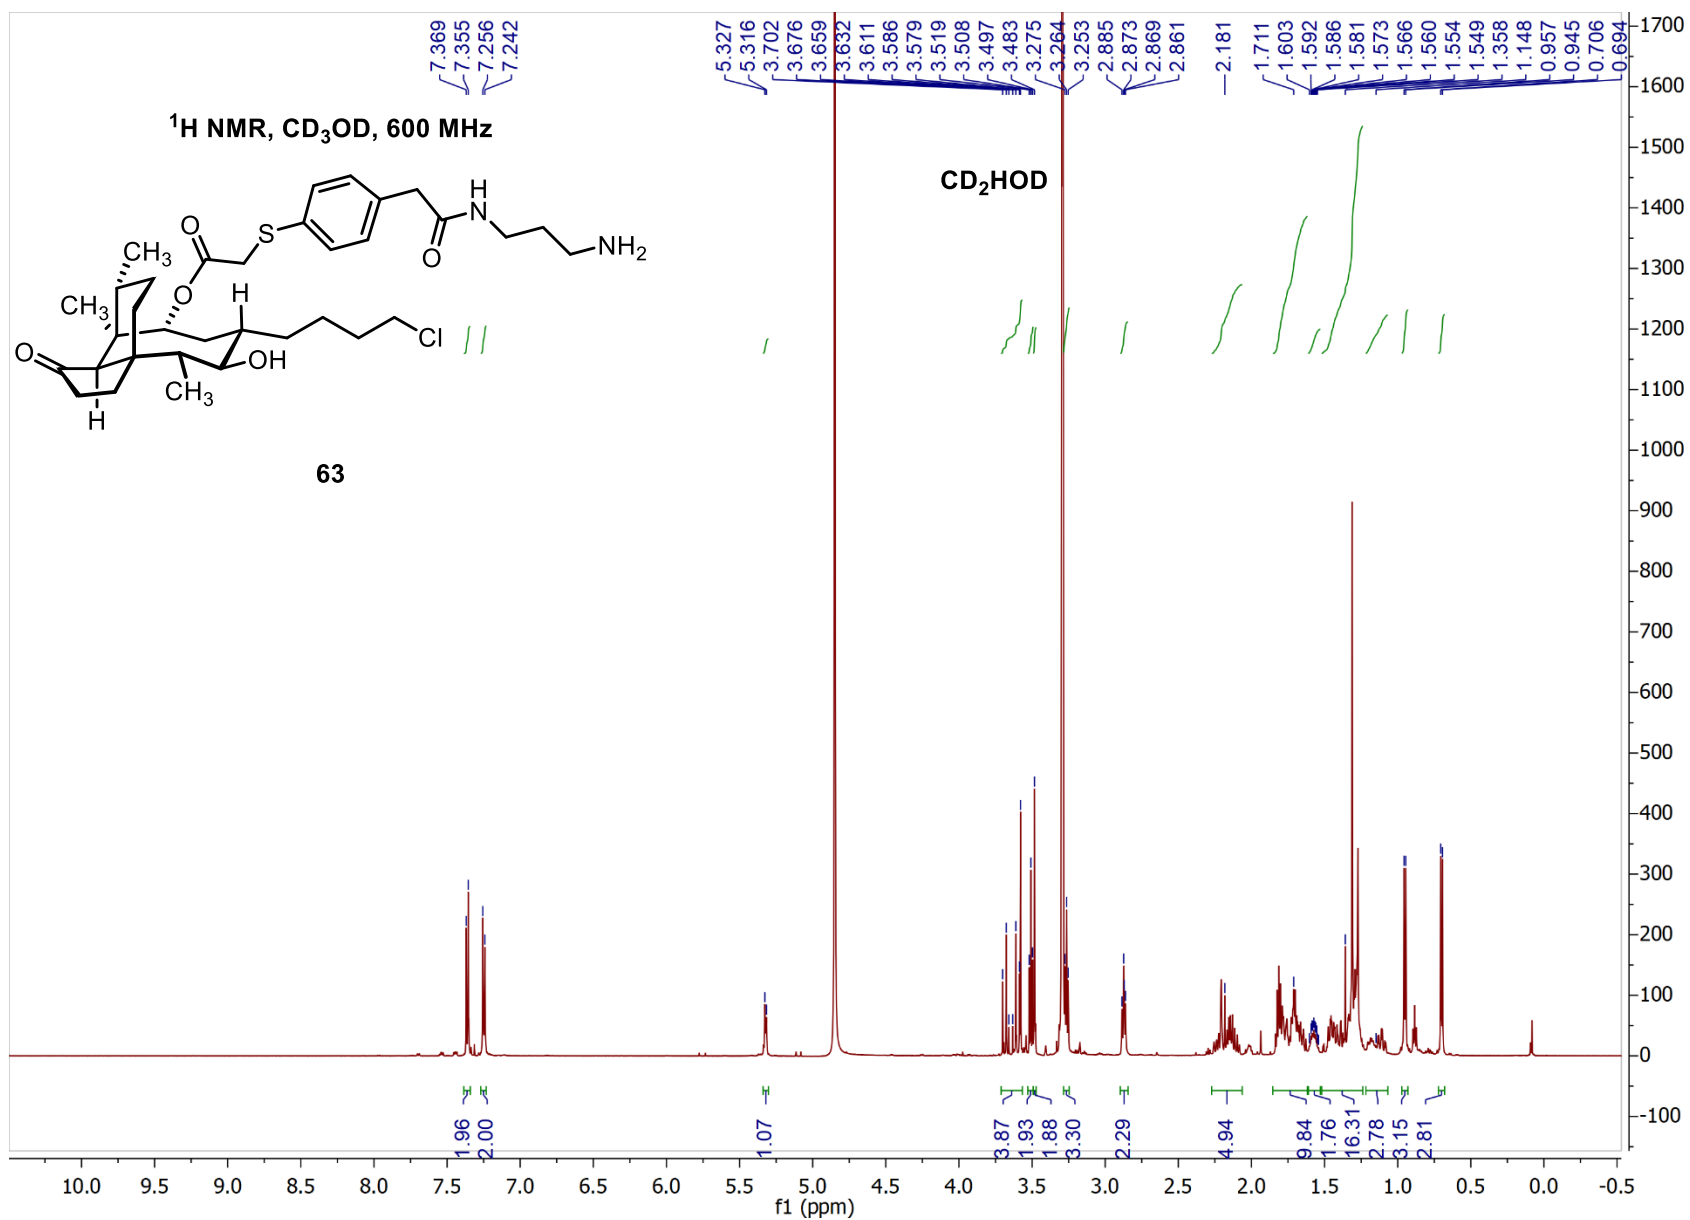

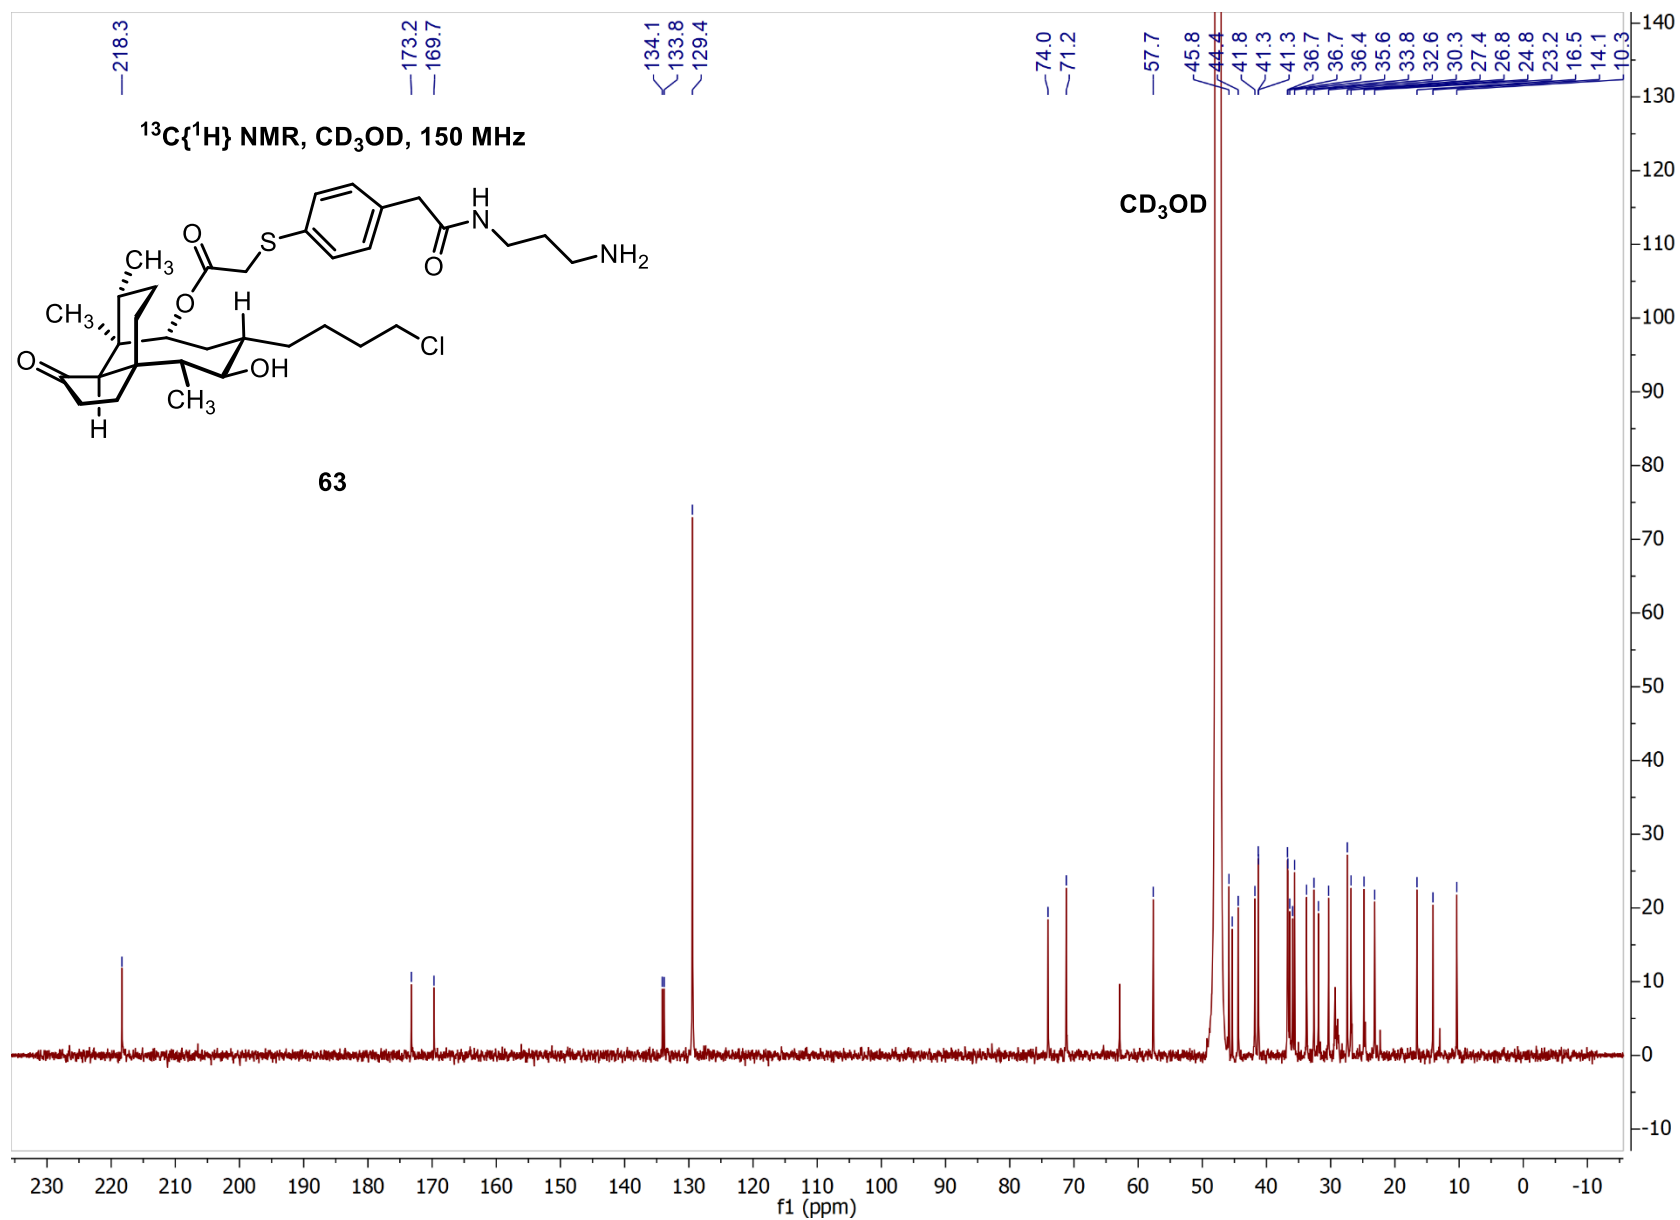



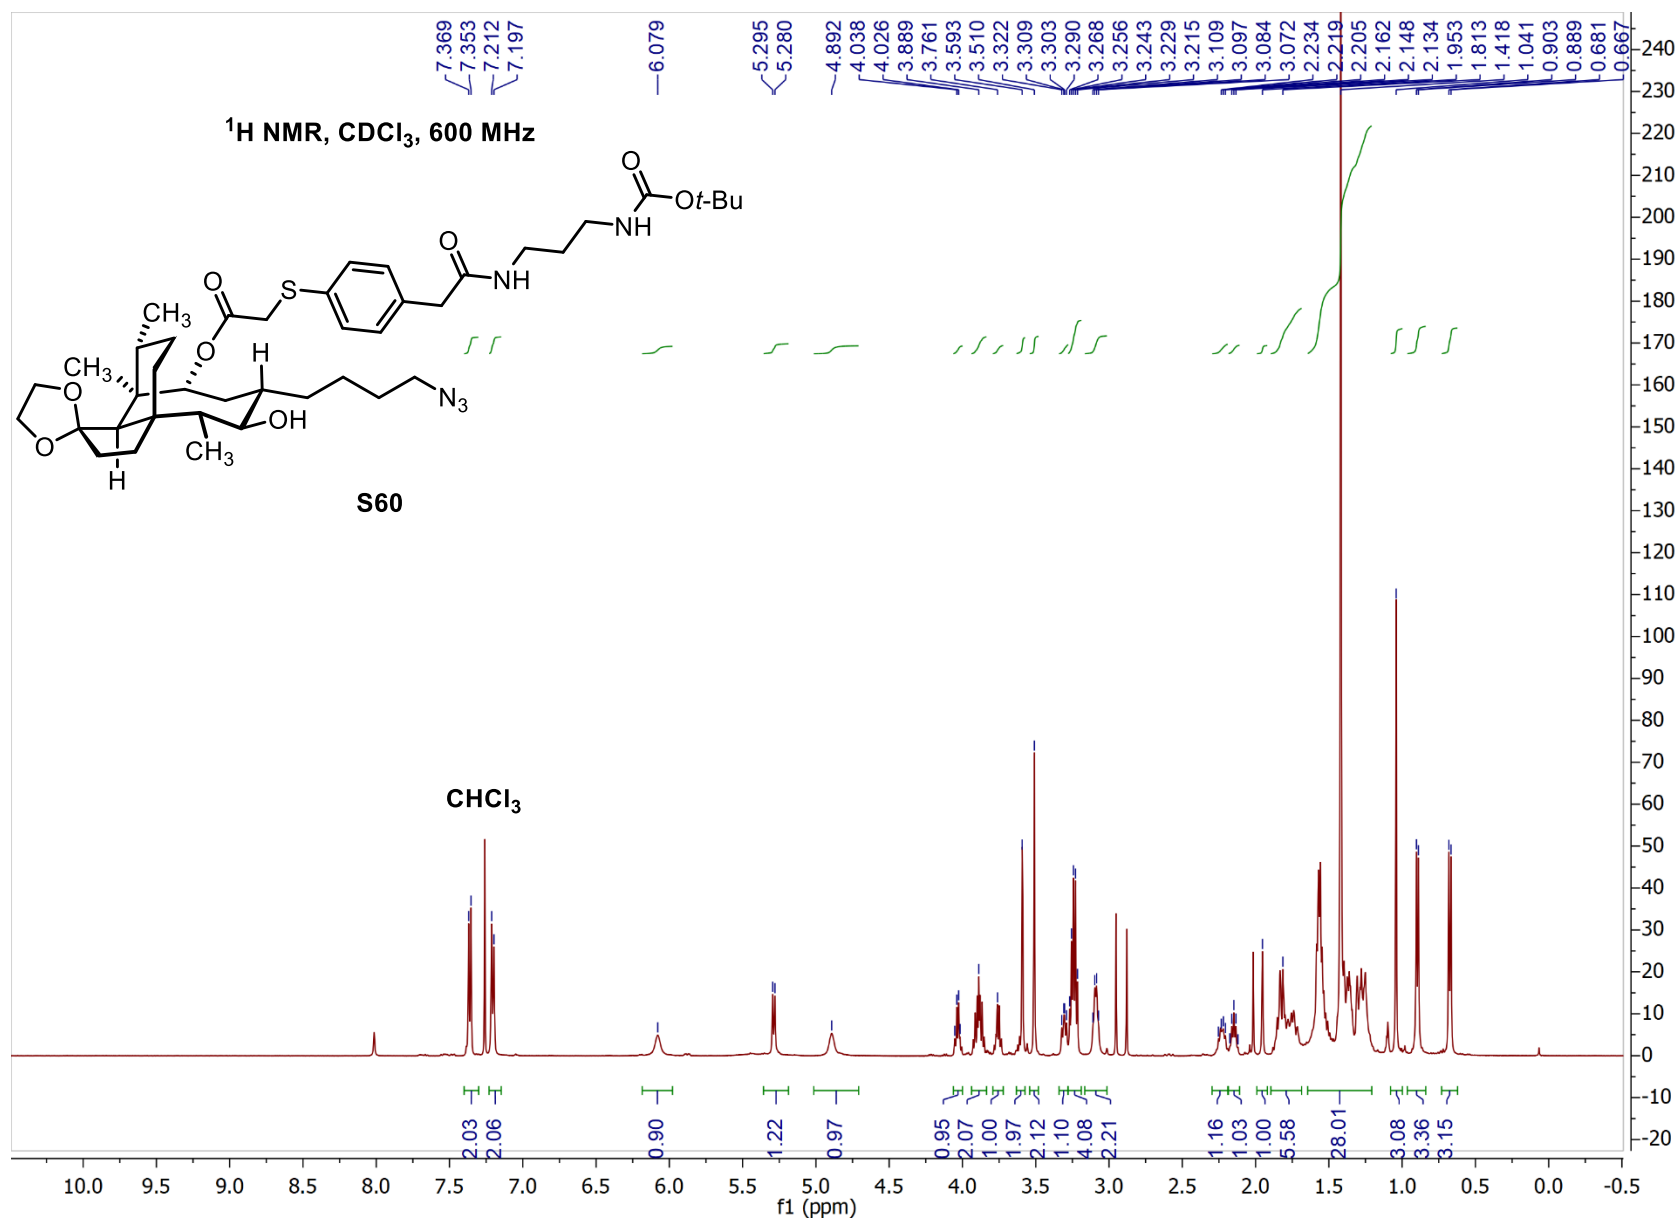

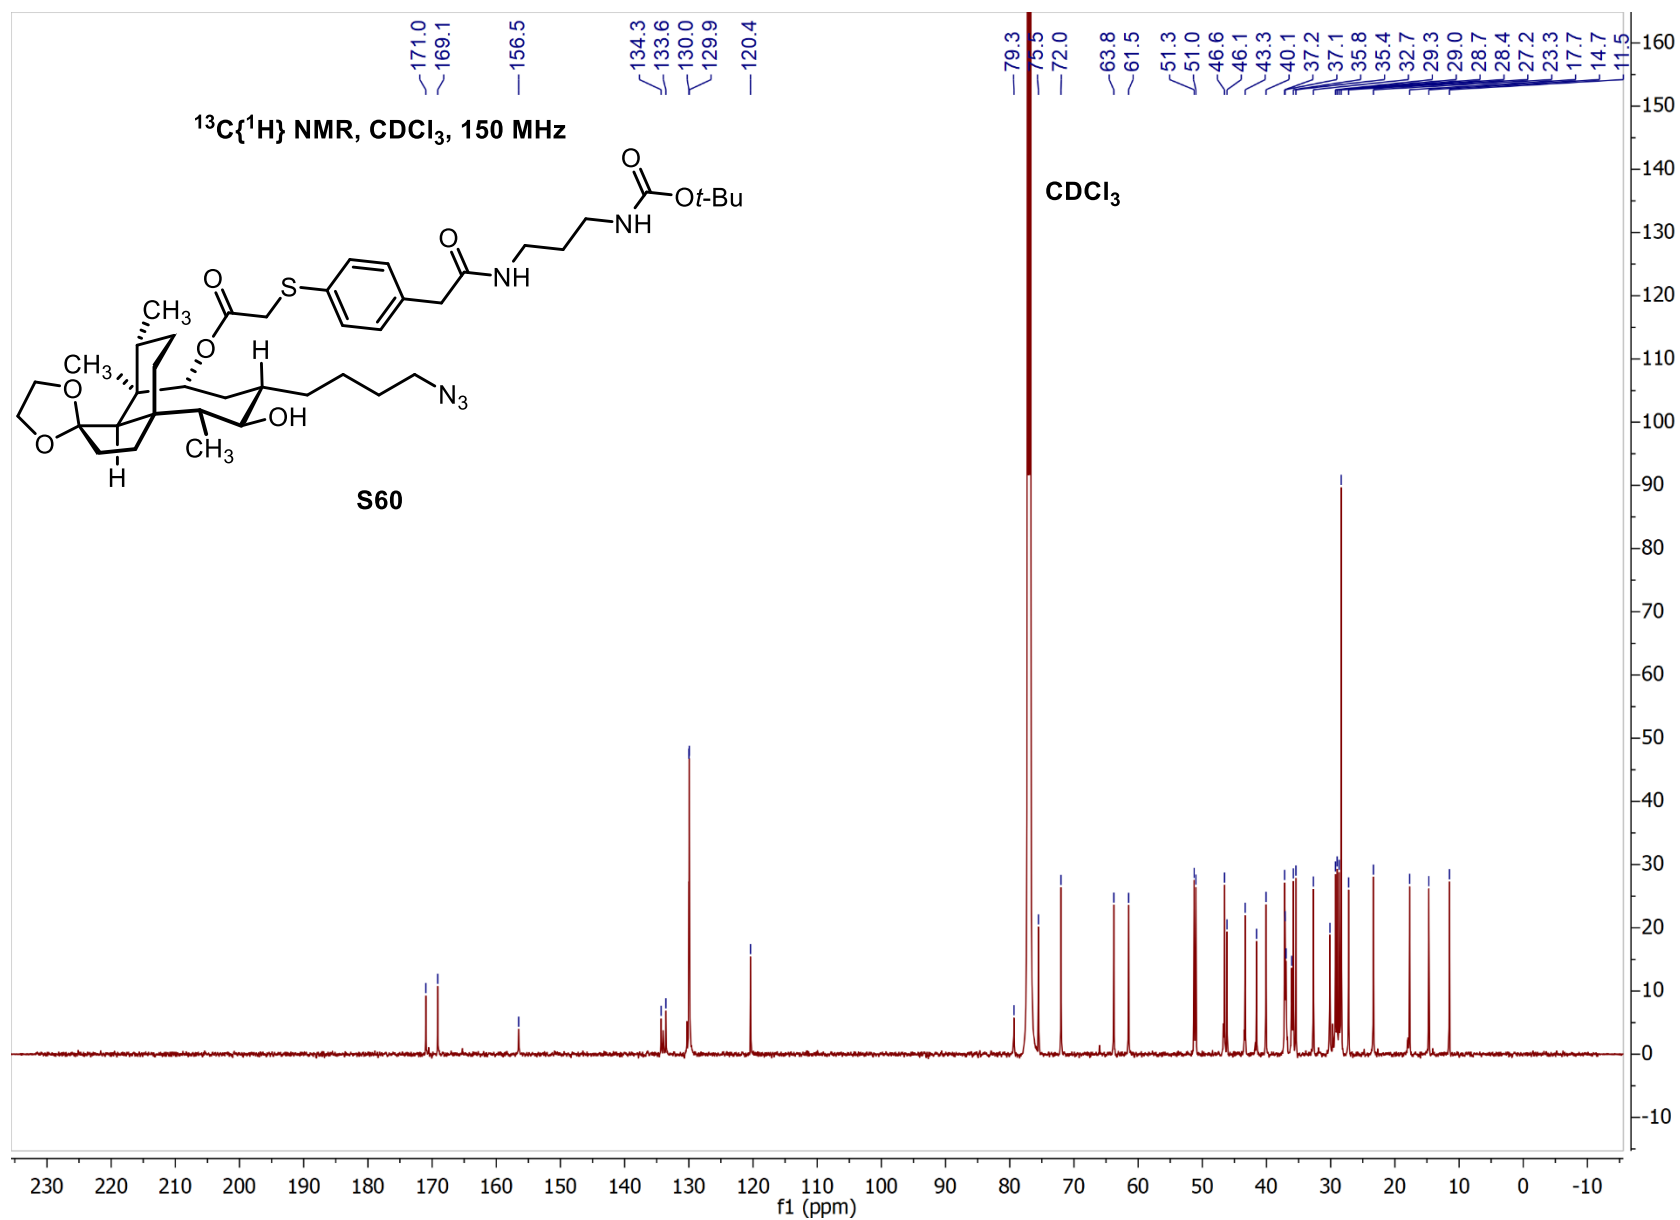

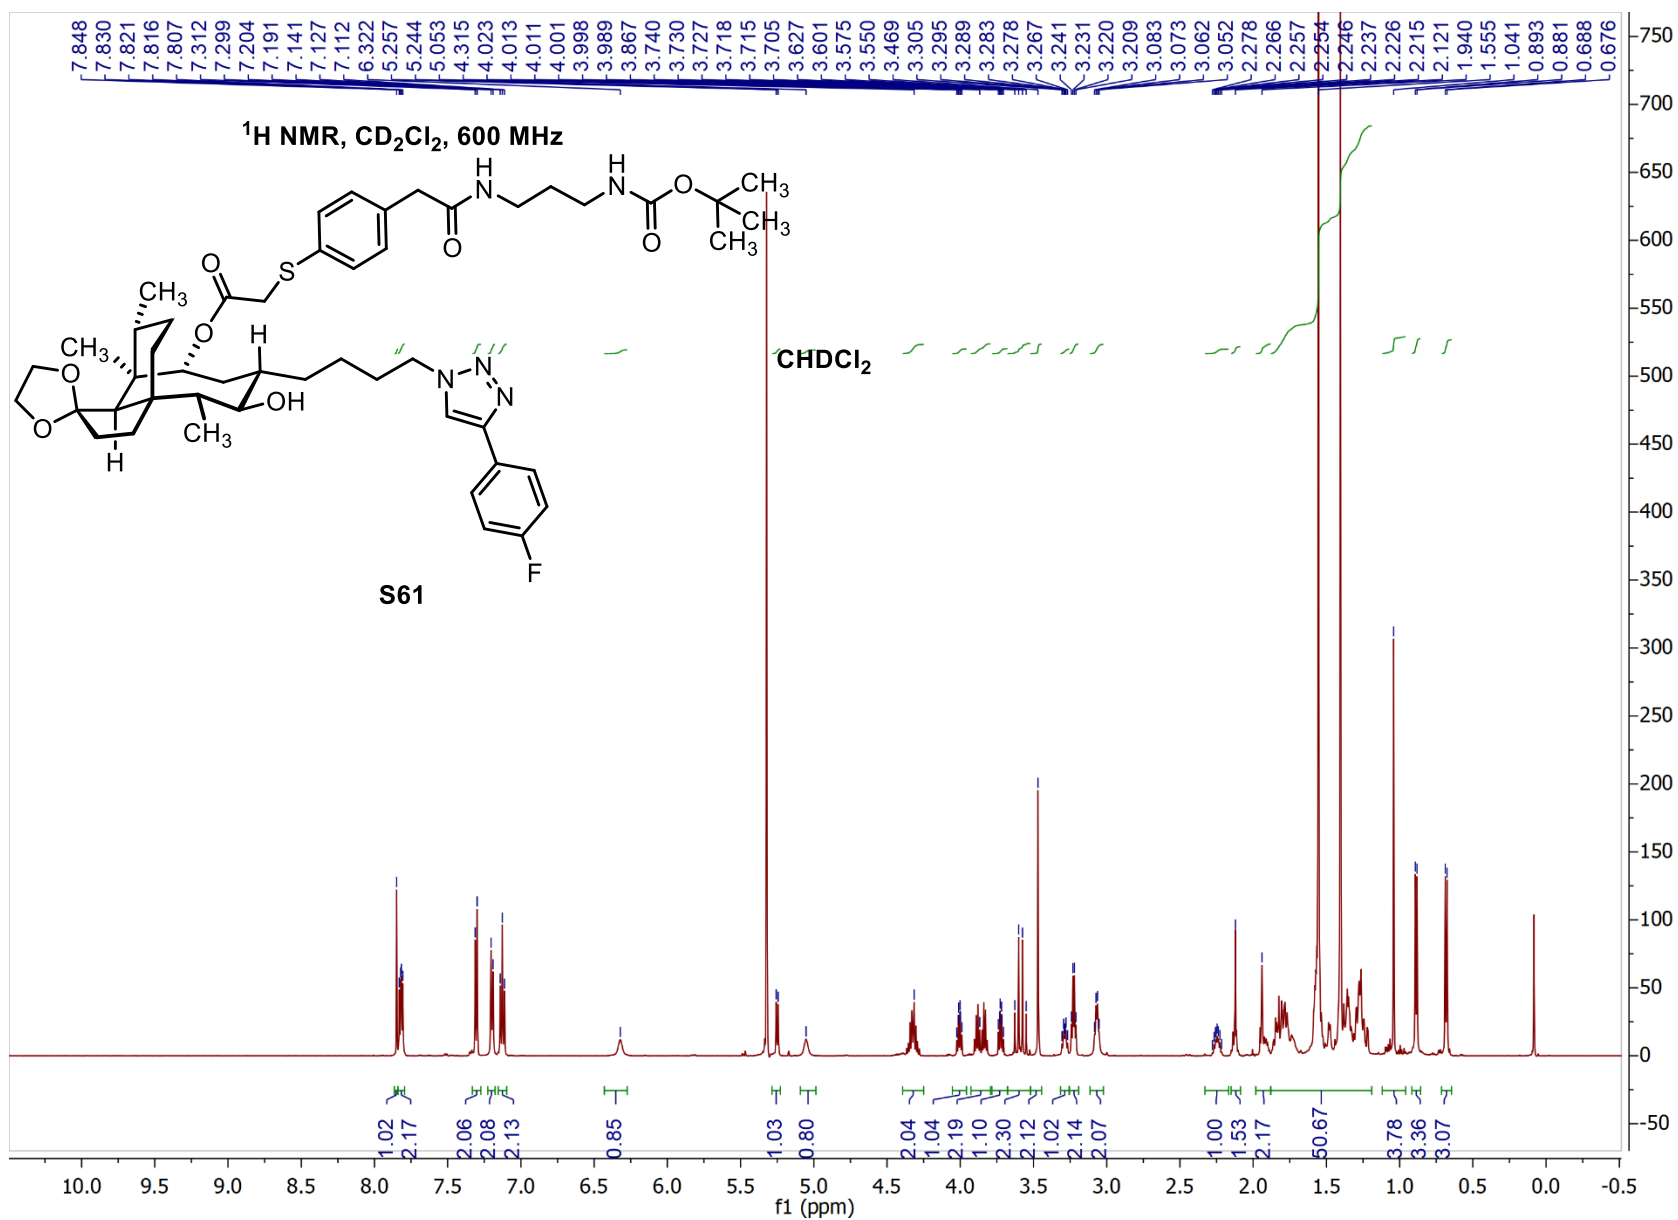

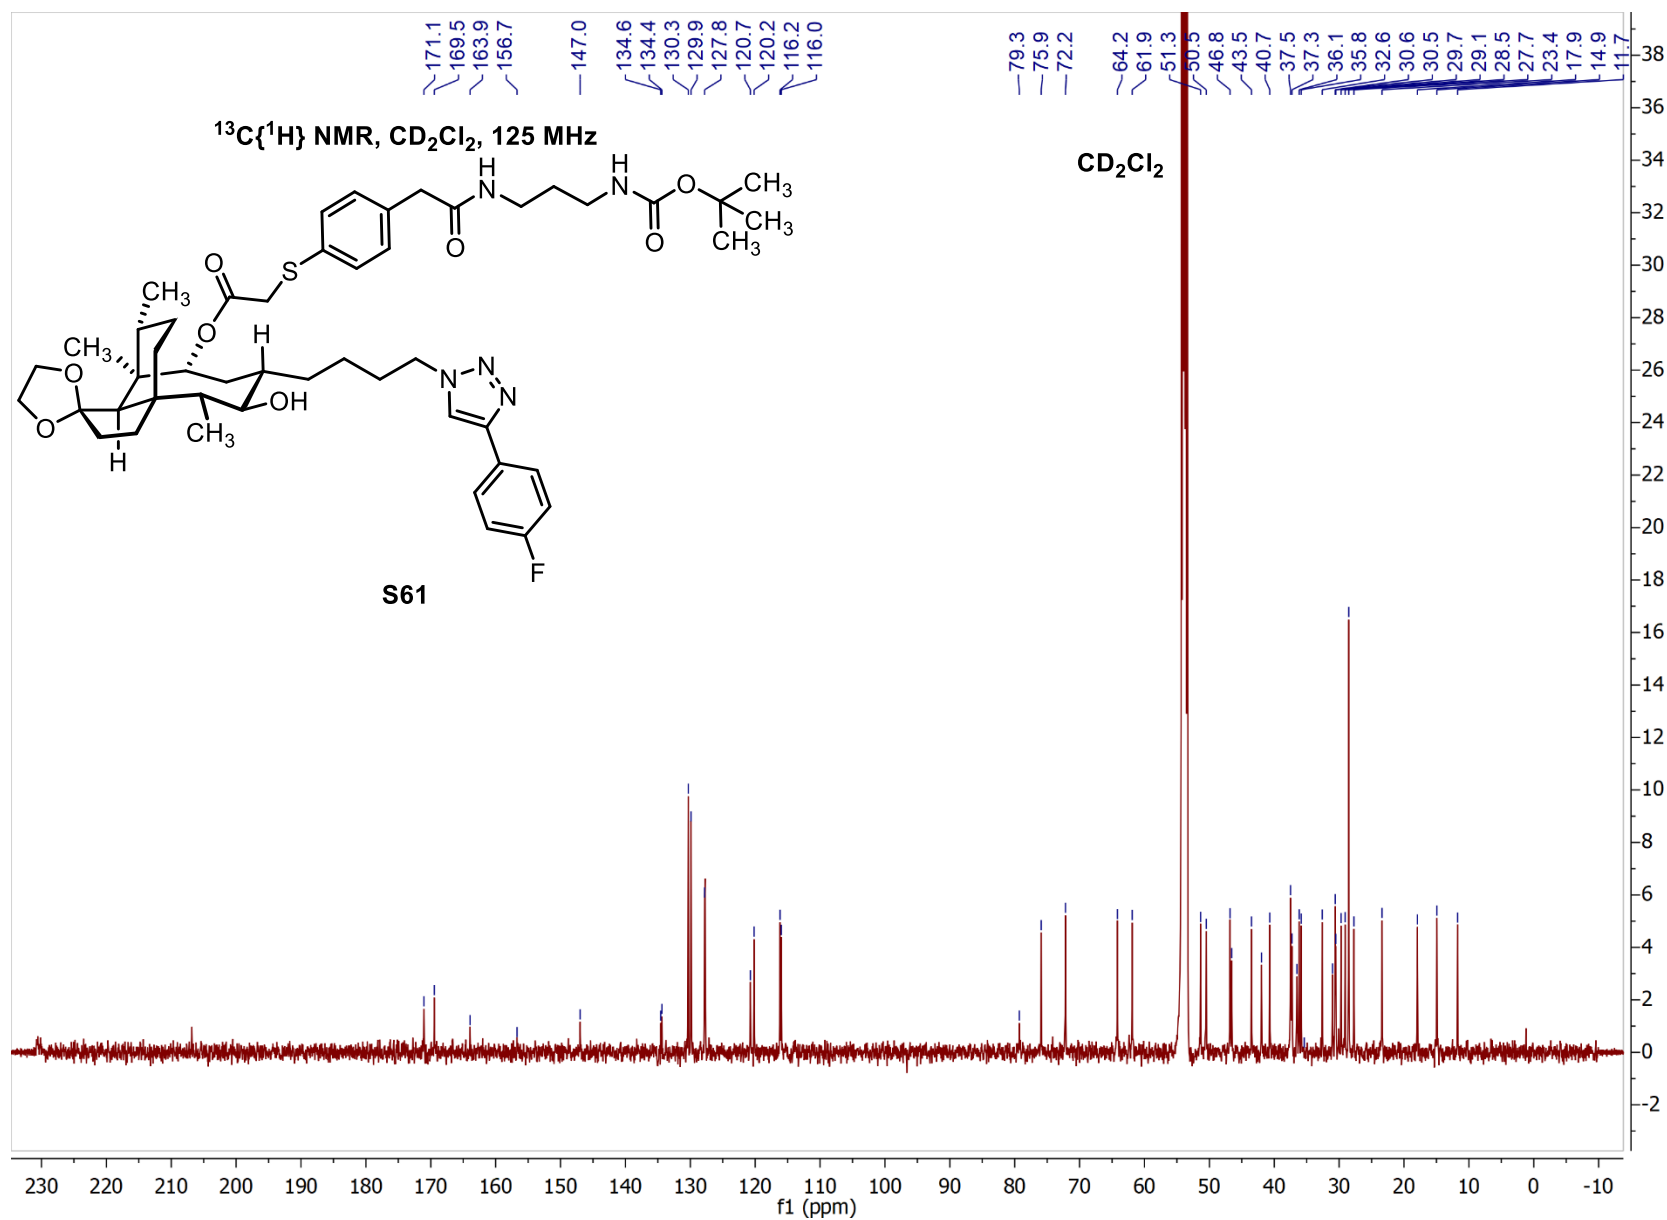

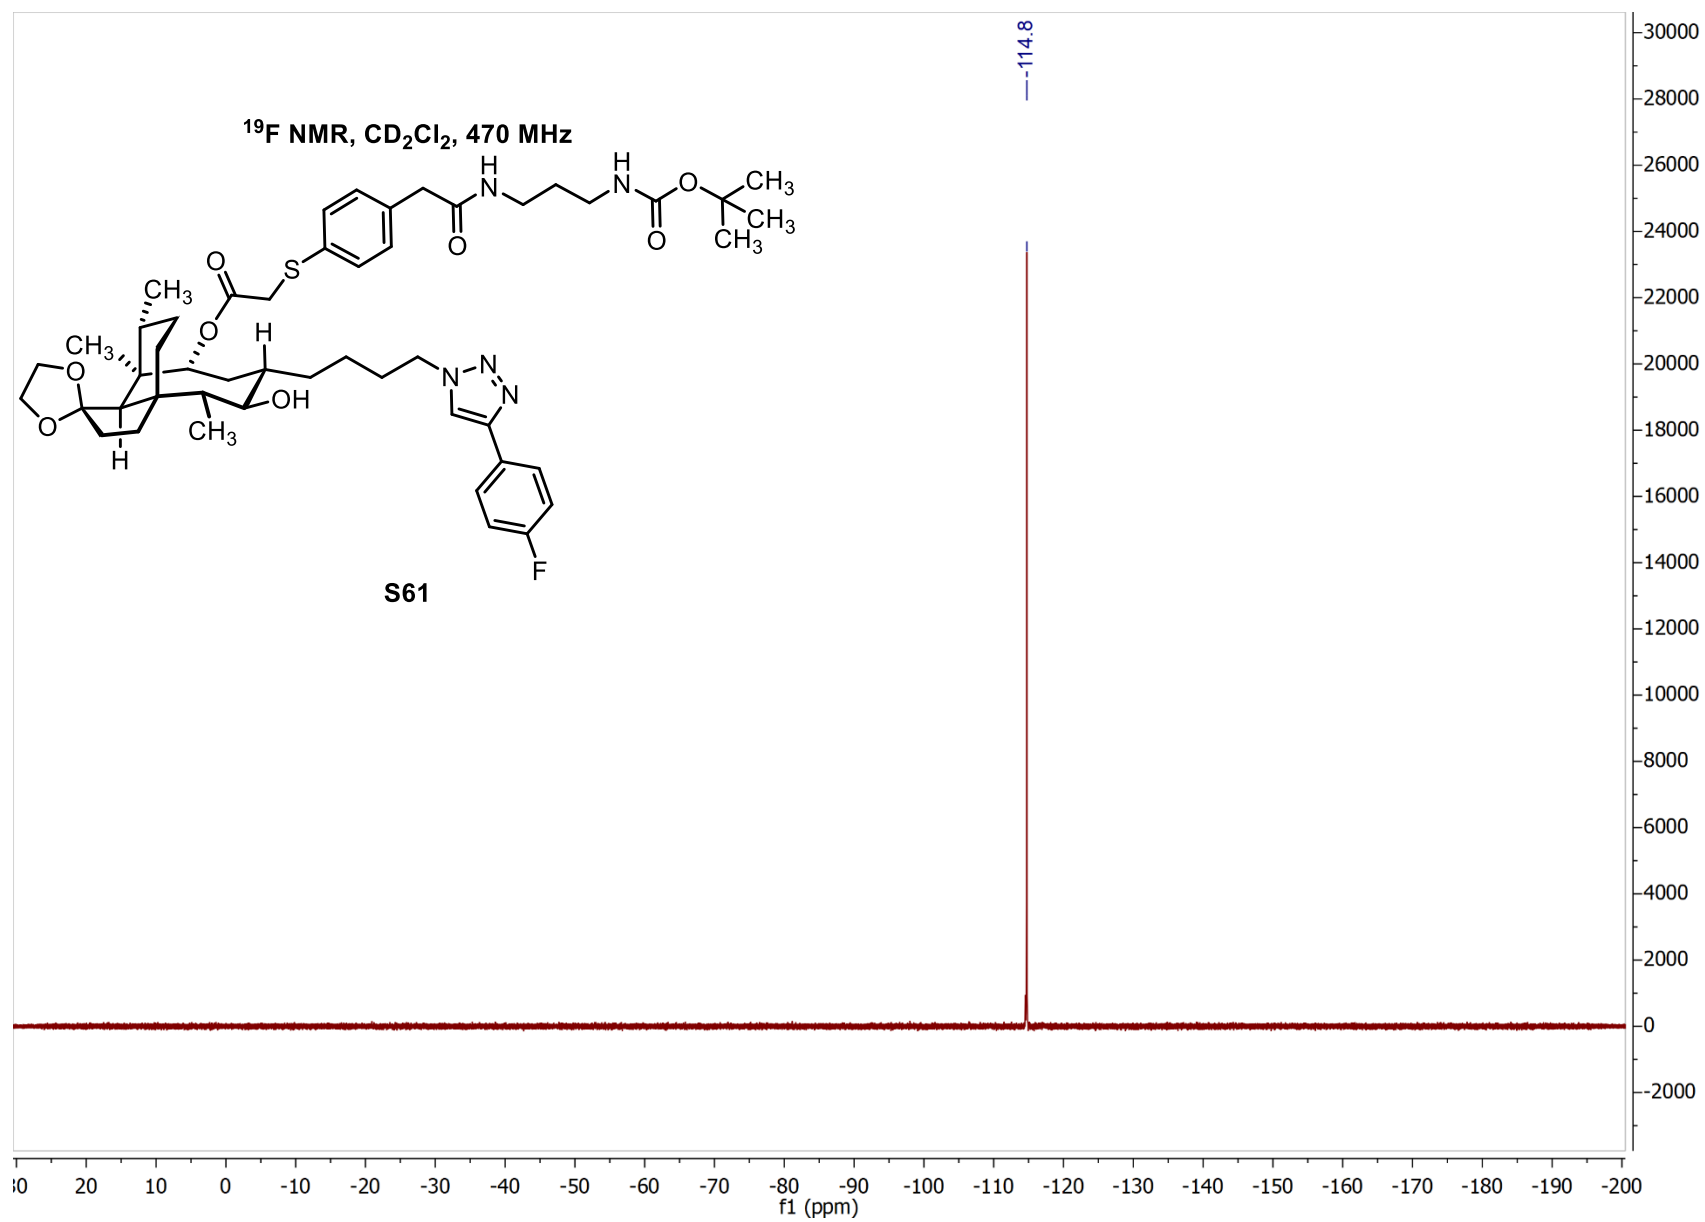

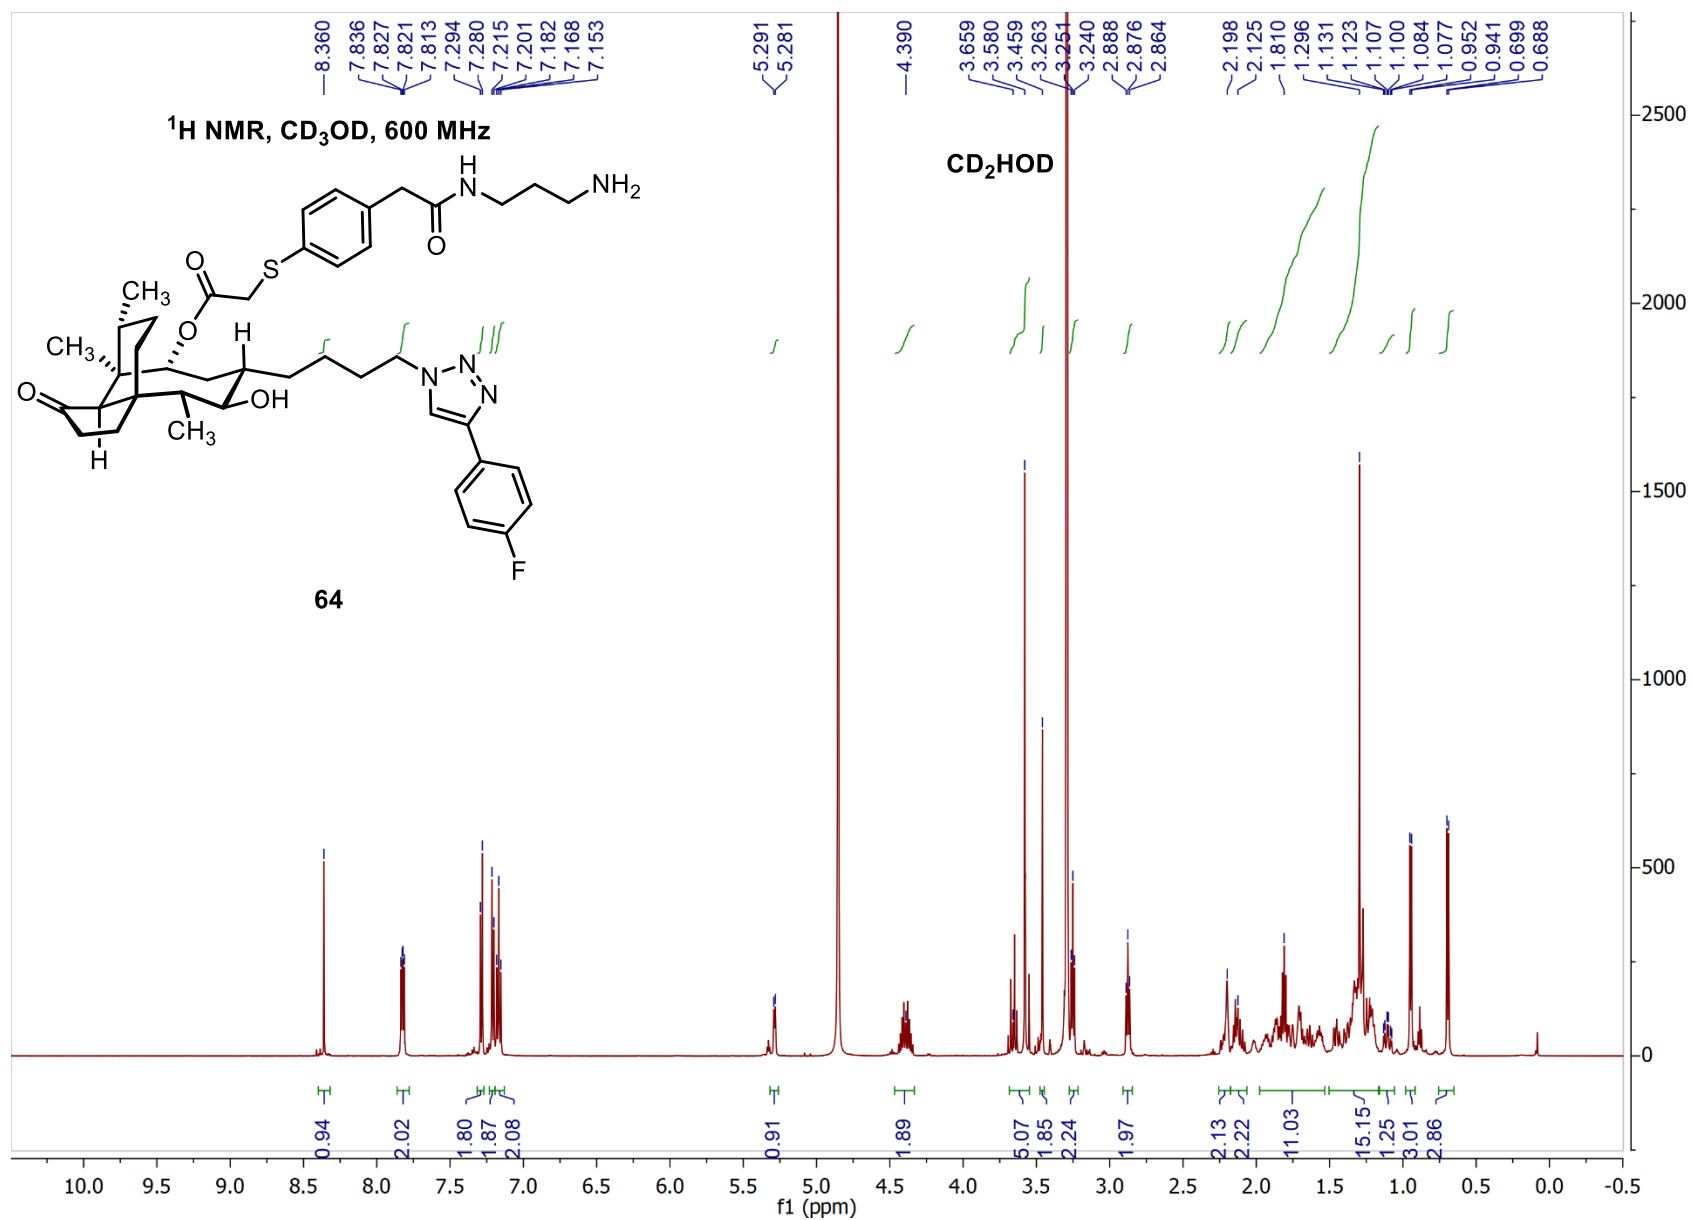

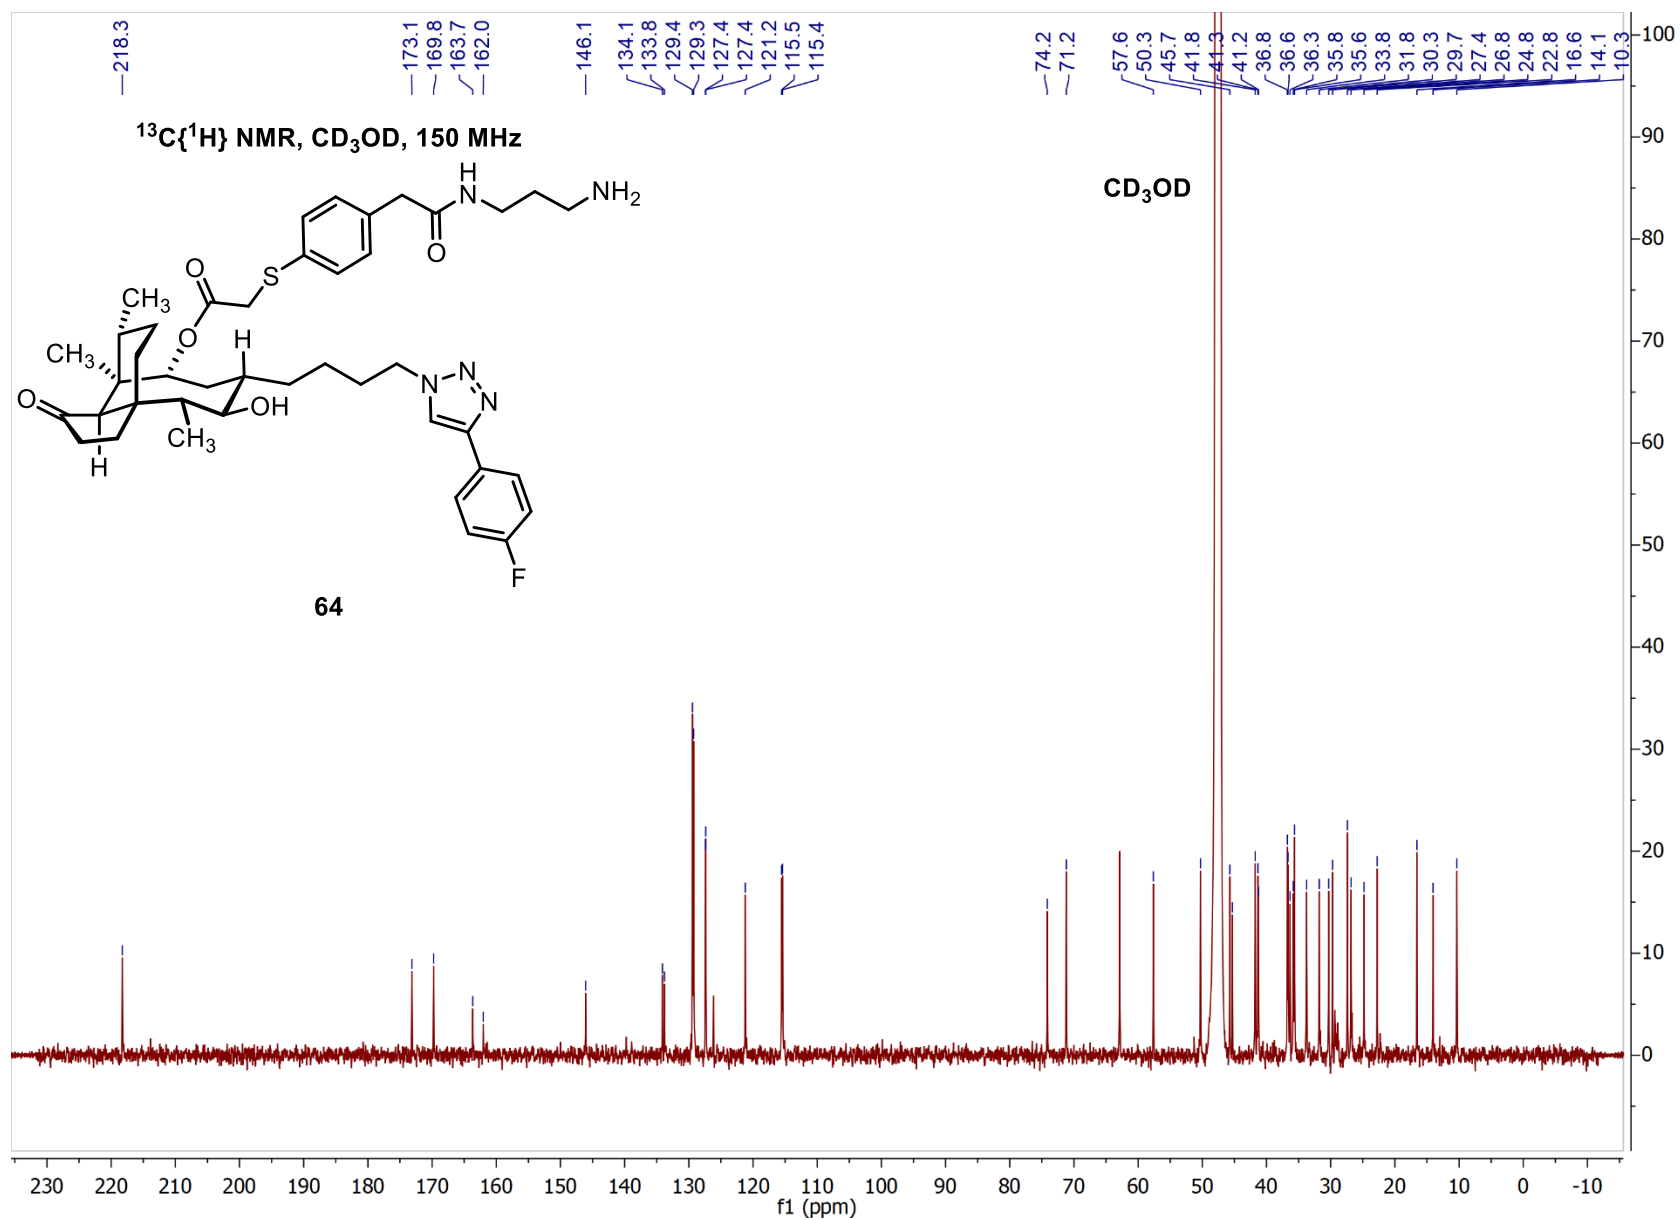

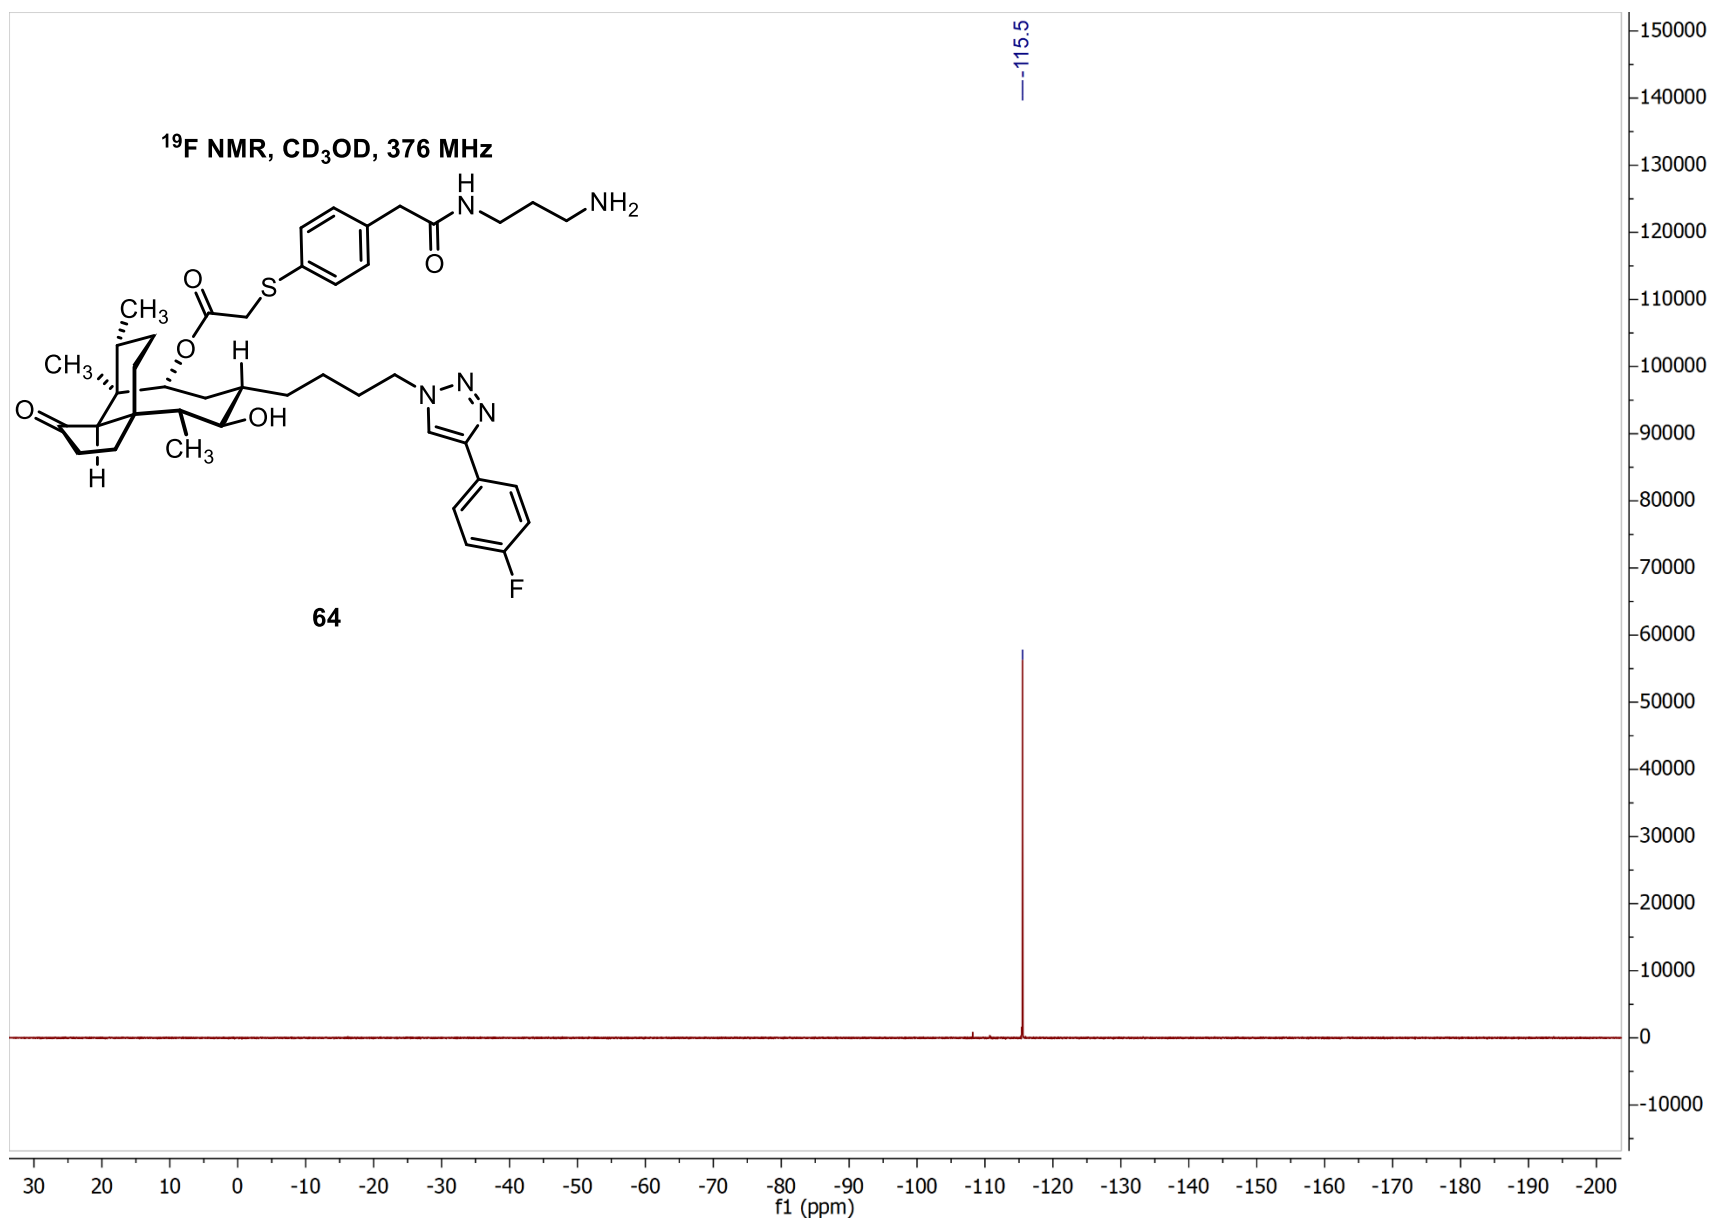



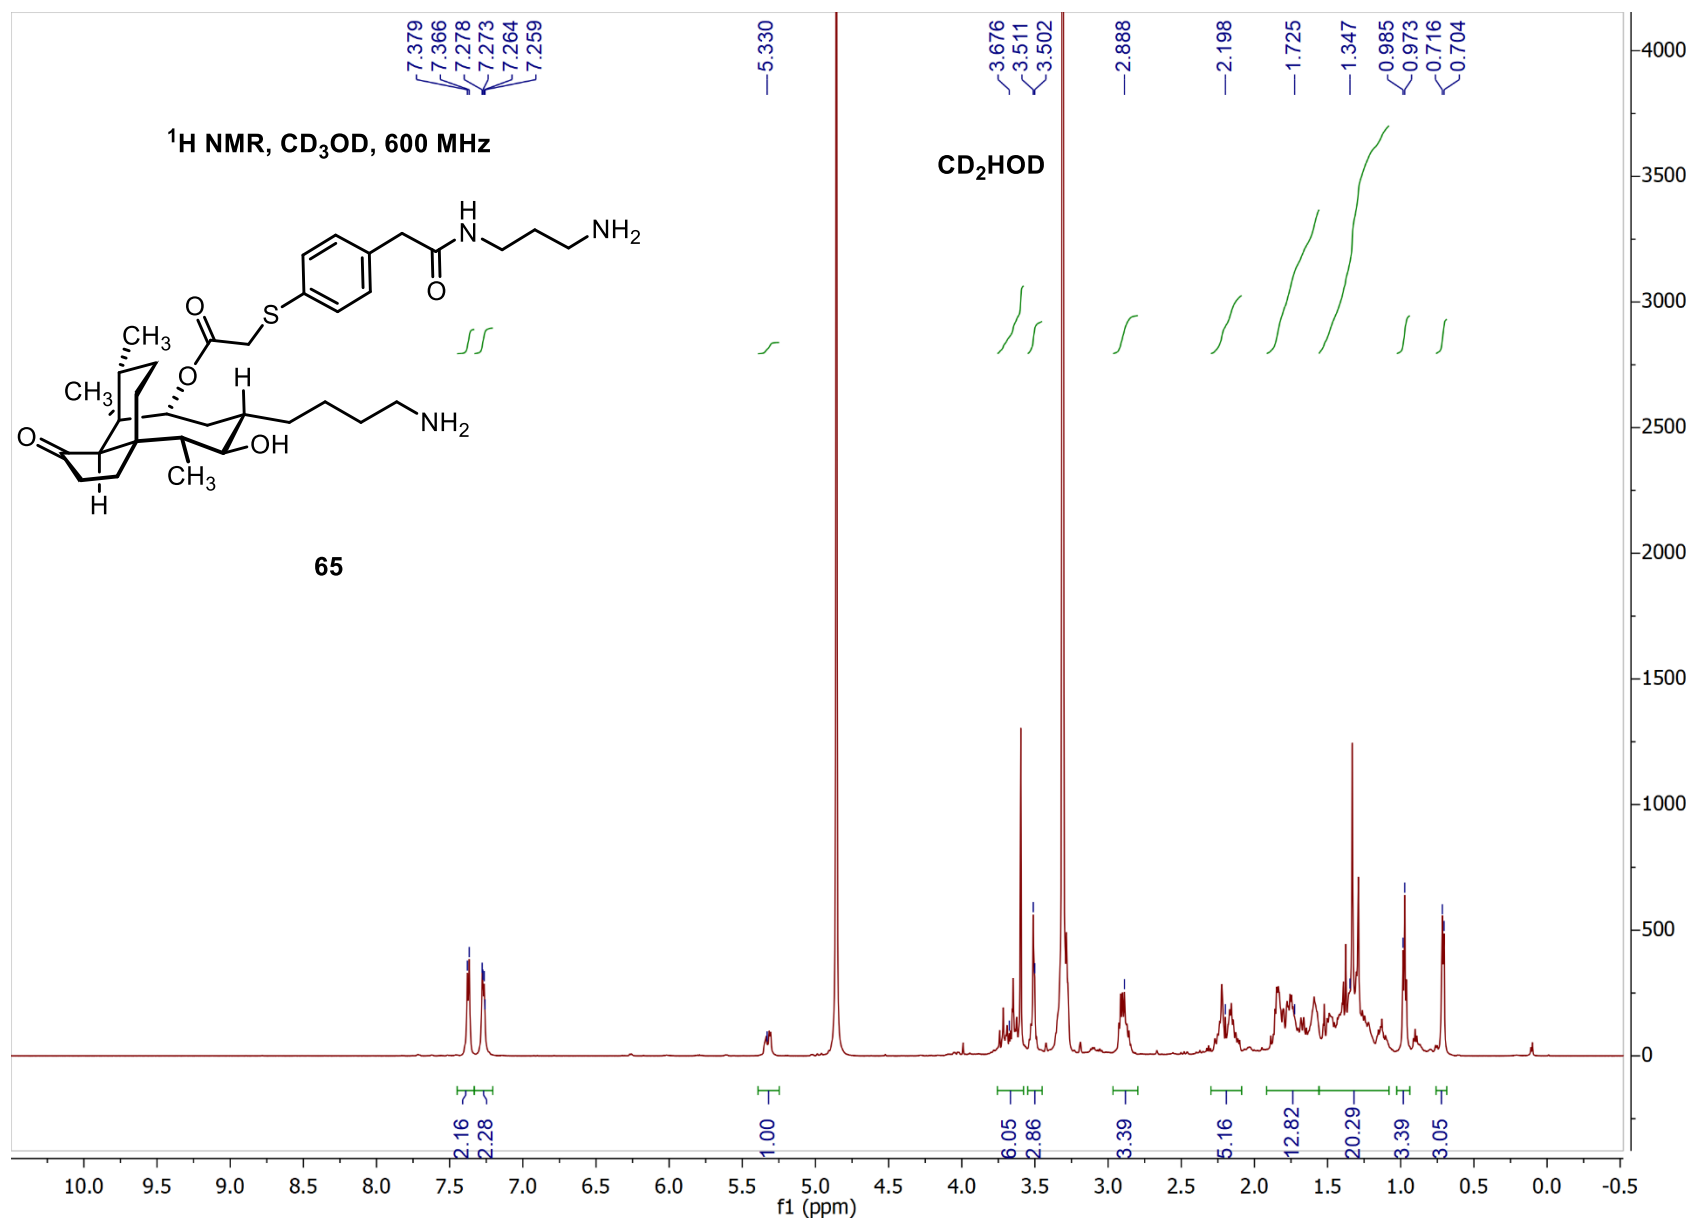

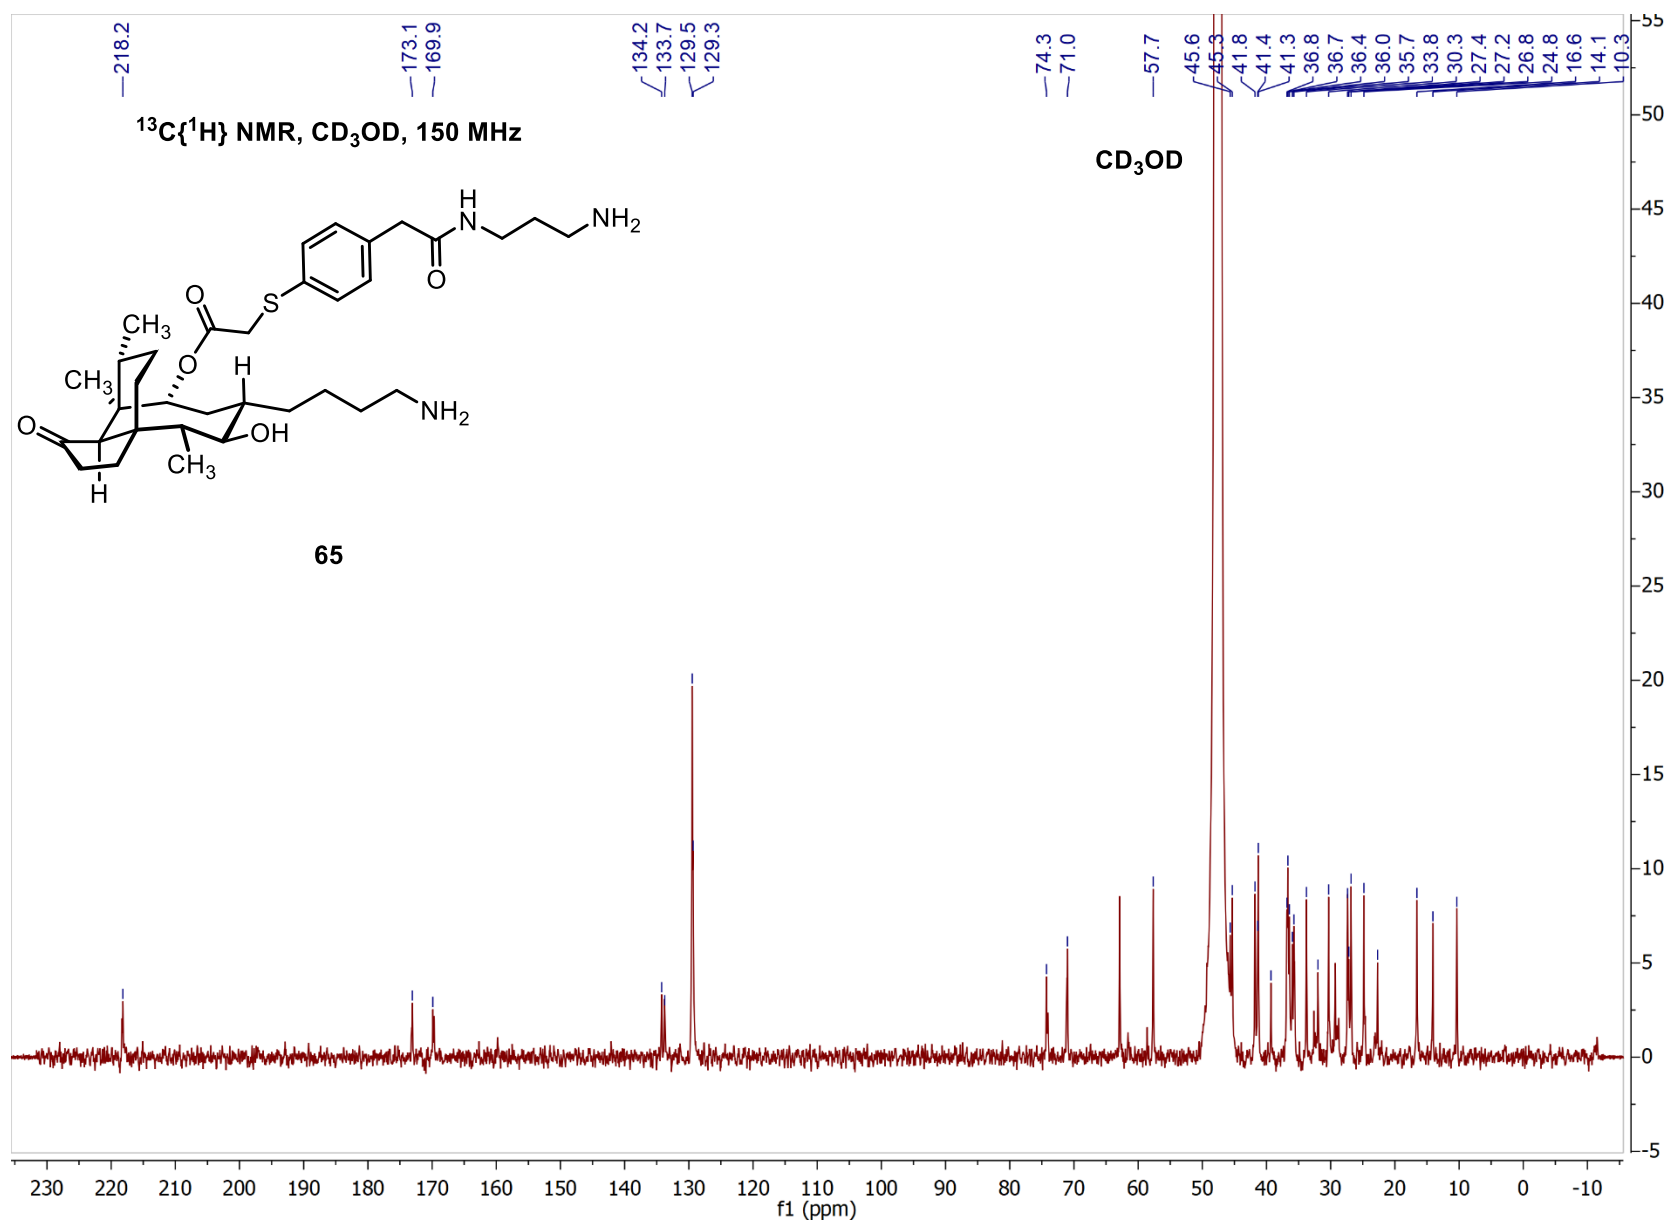

65, HSQC, CD<sub>3</sub>OD, 600 MHz

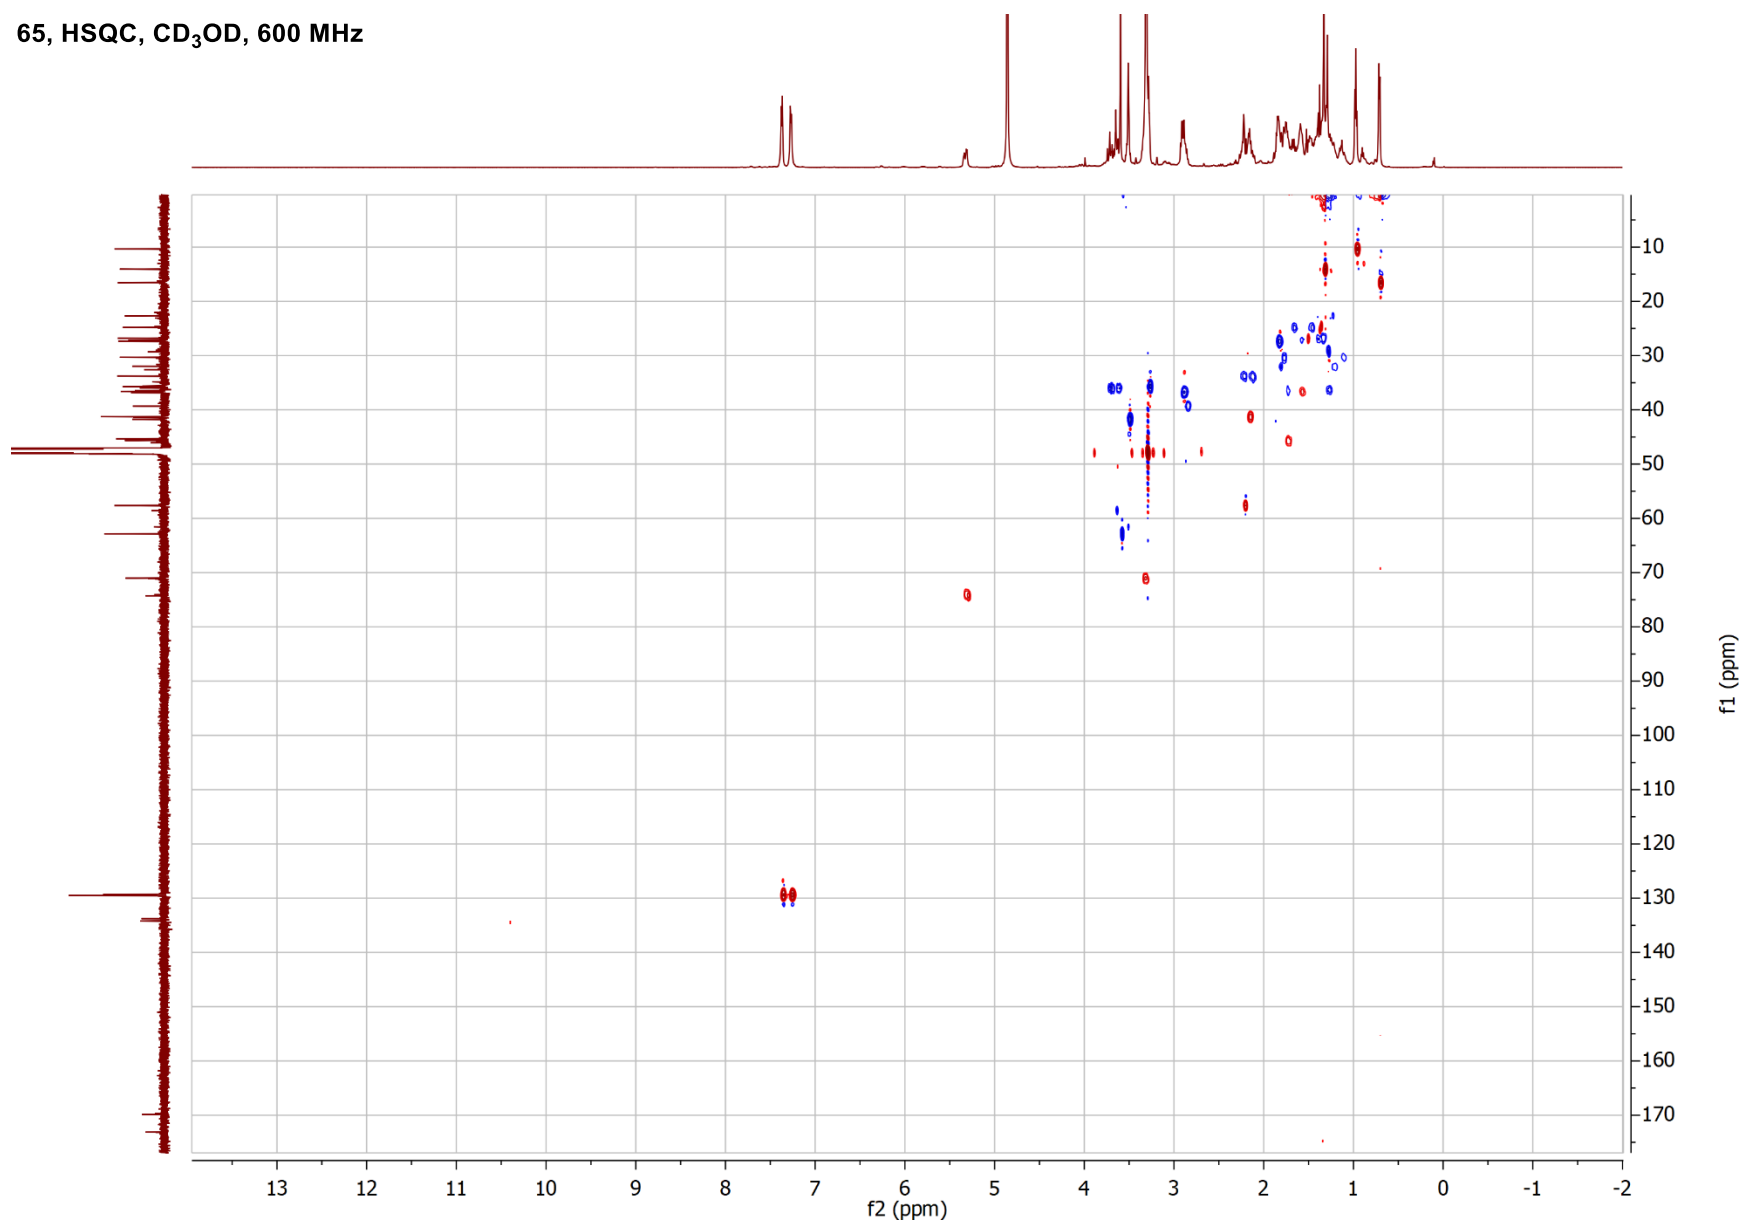

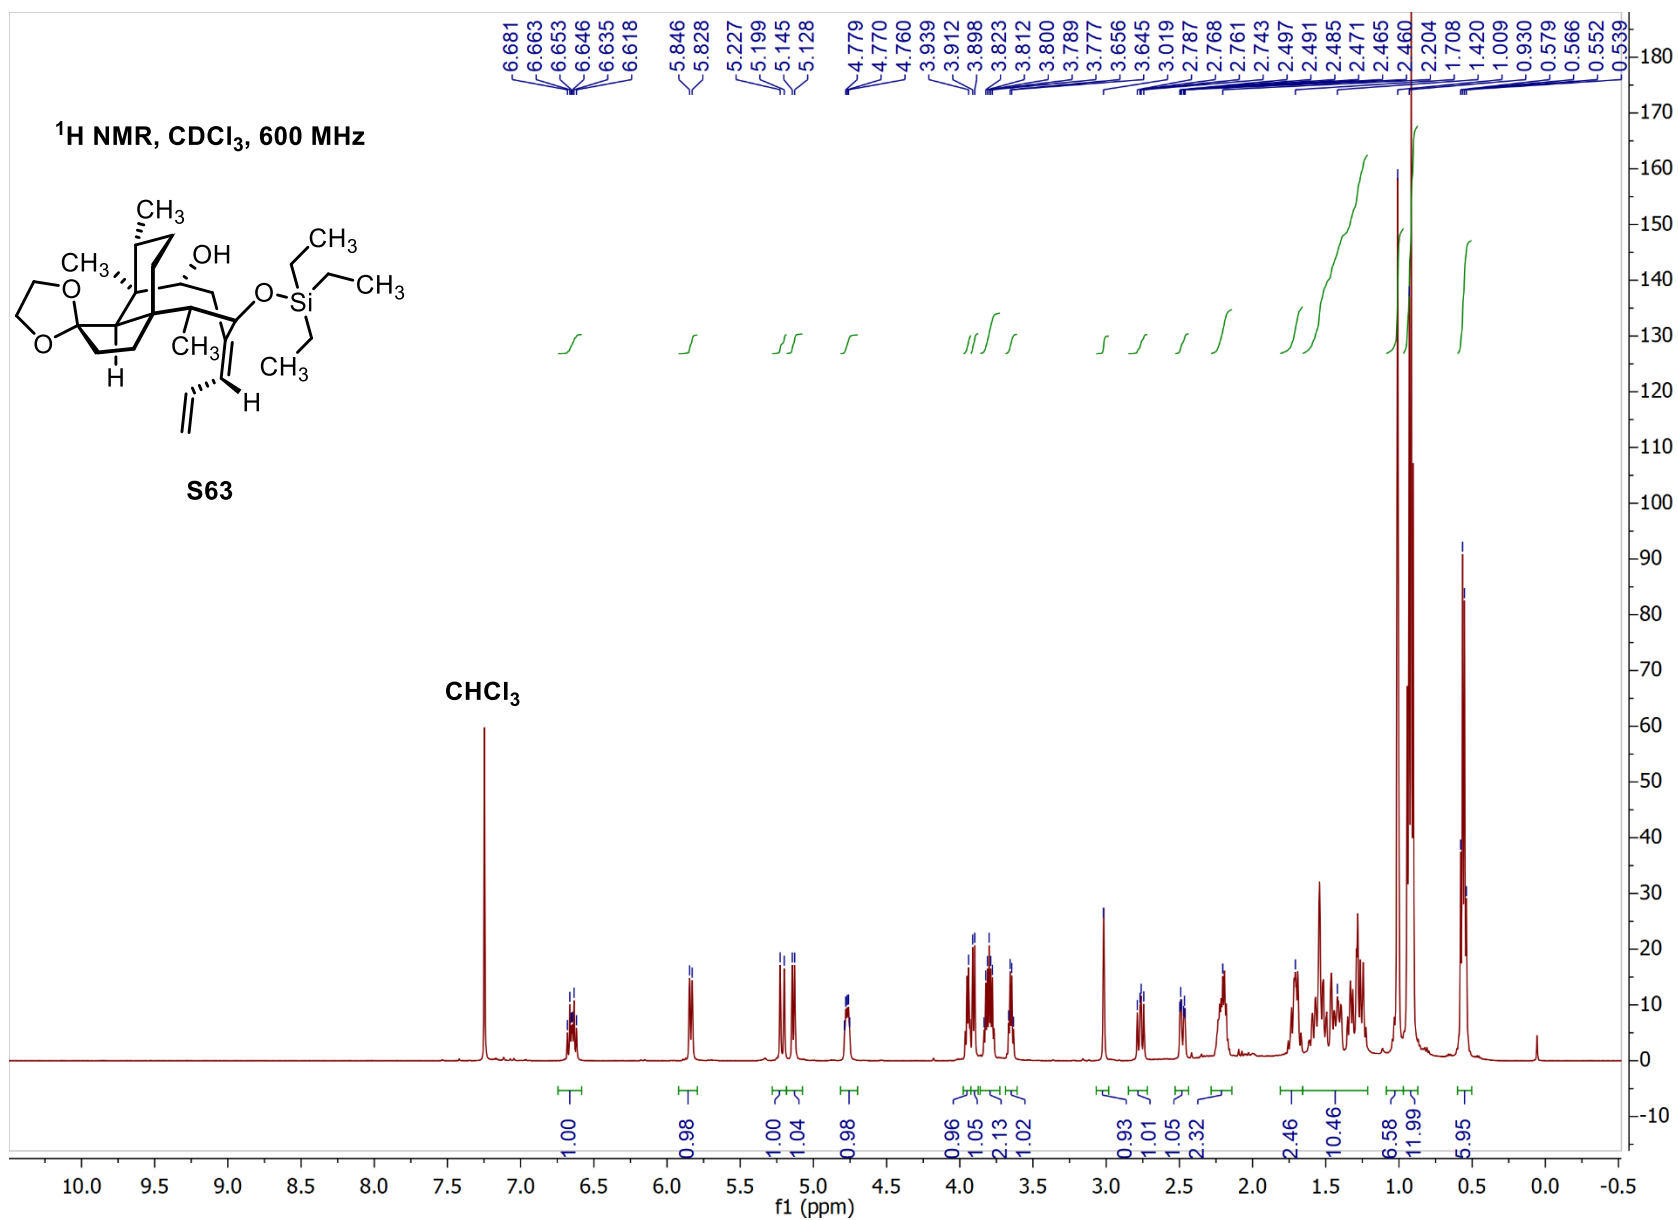

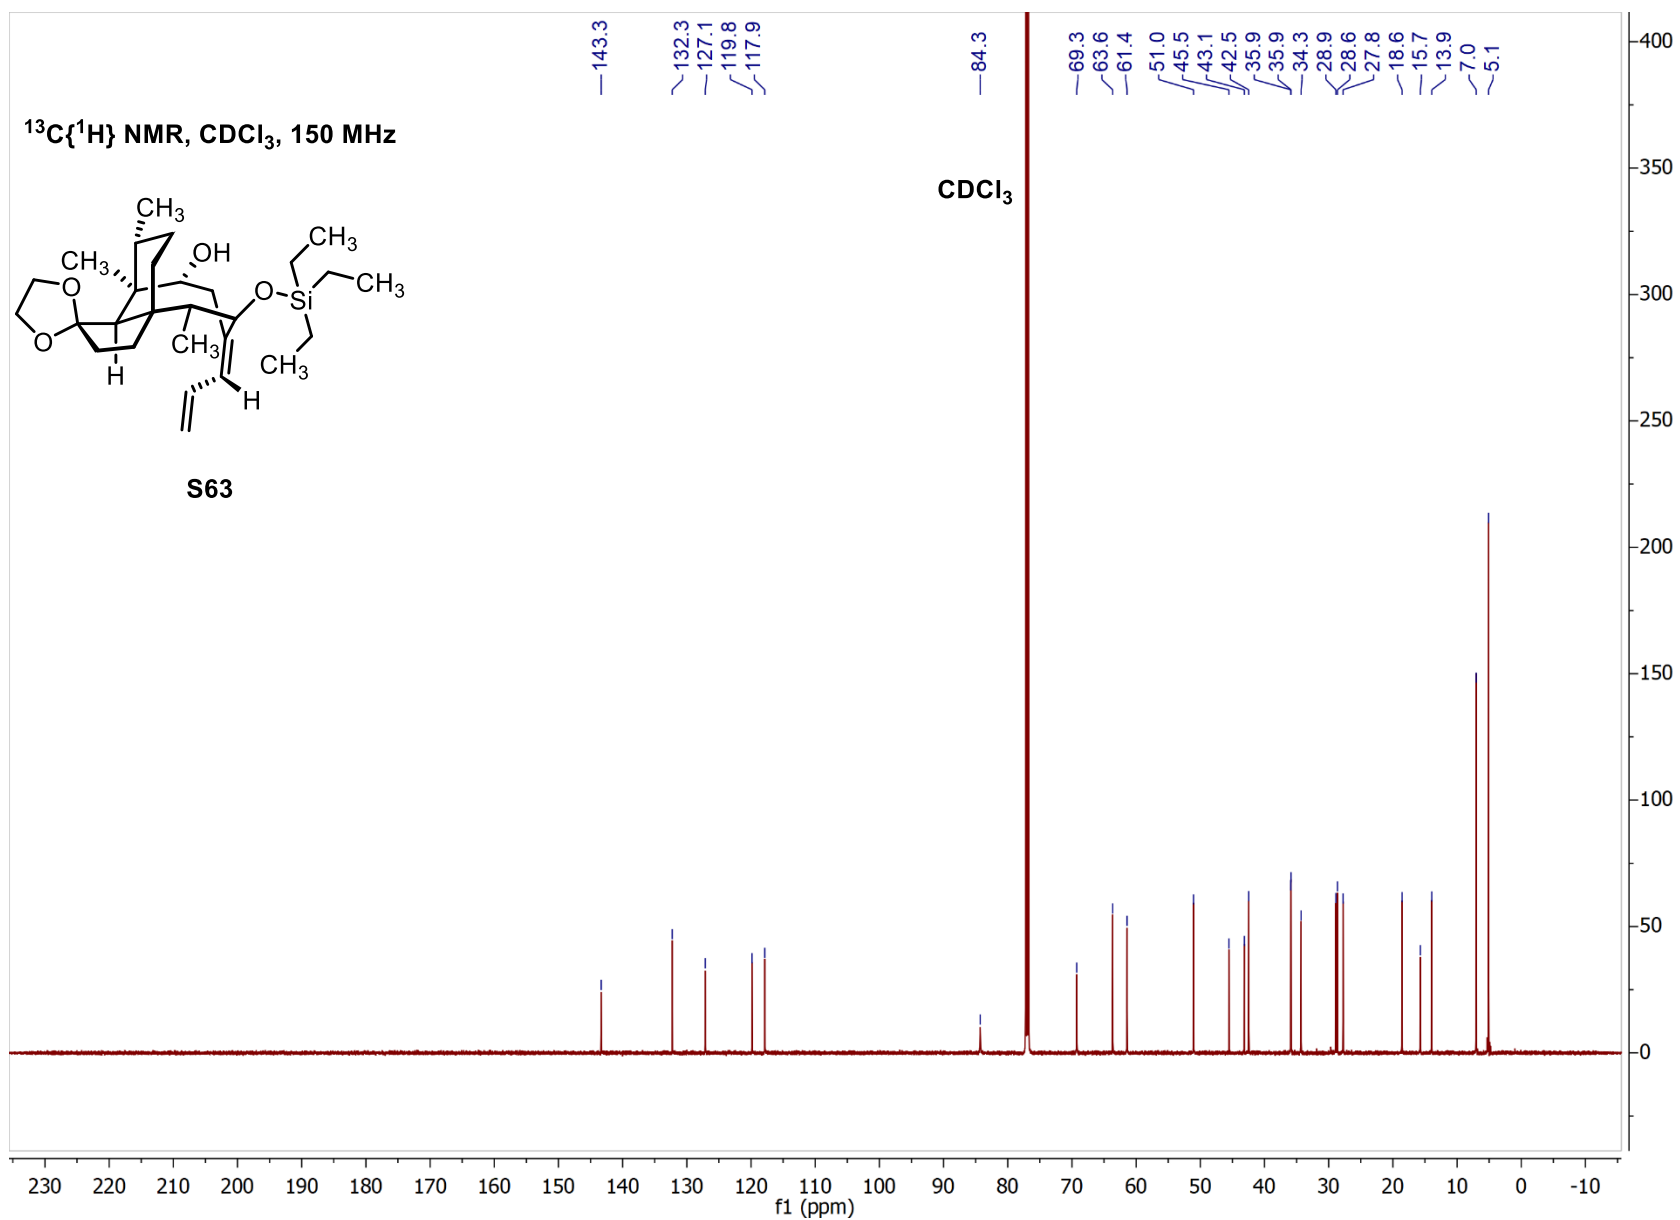

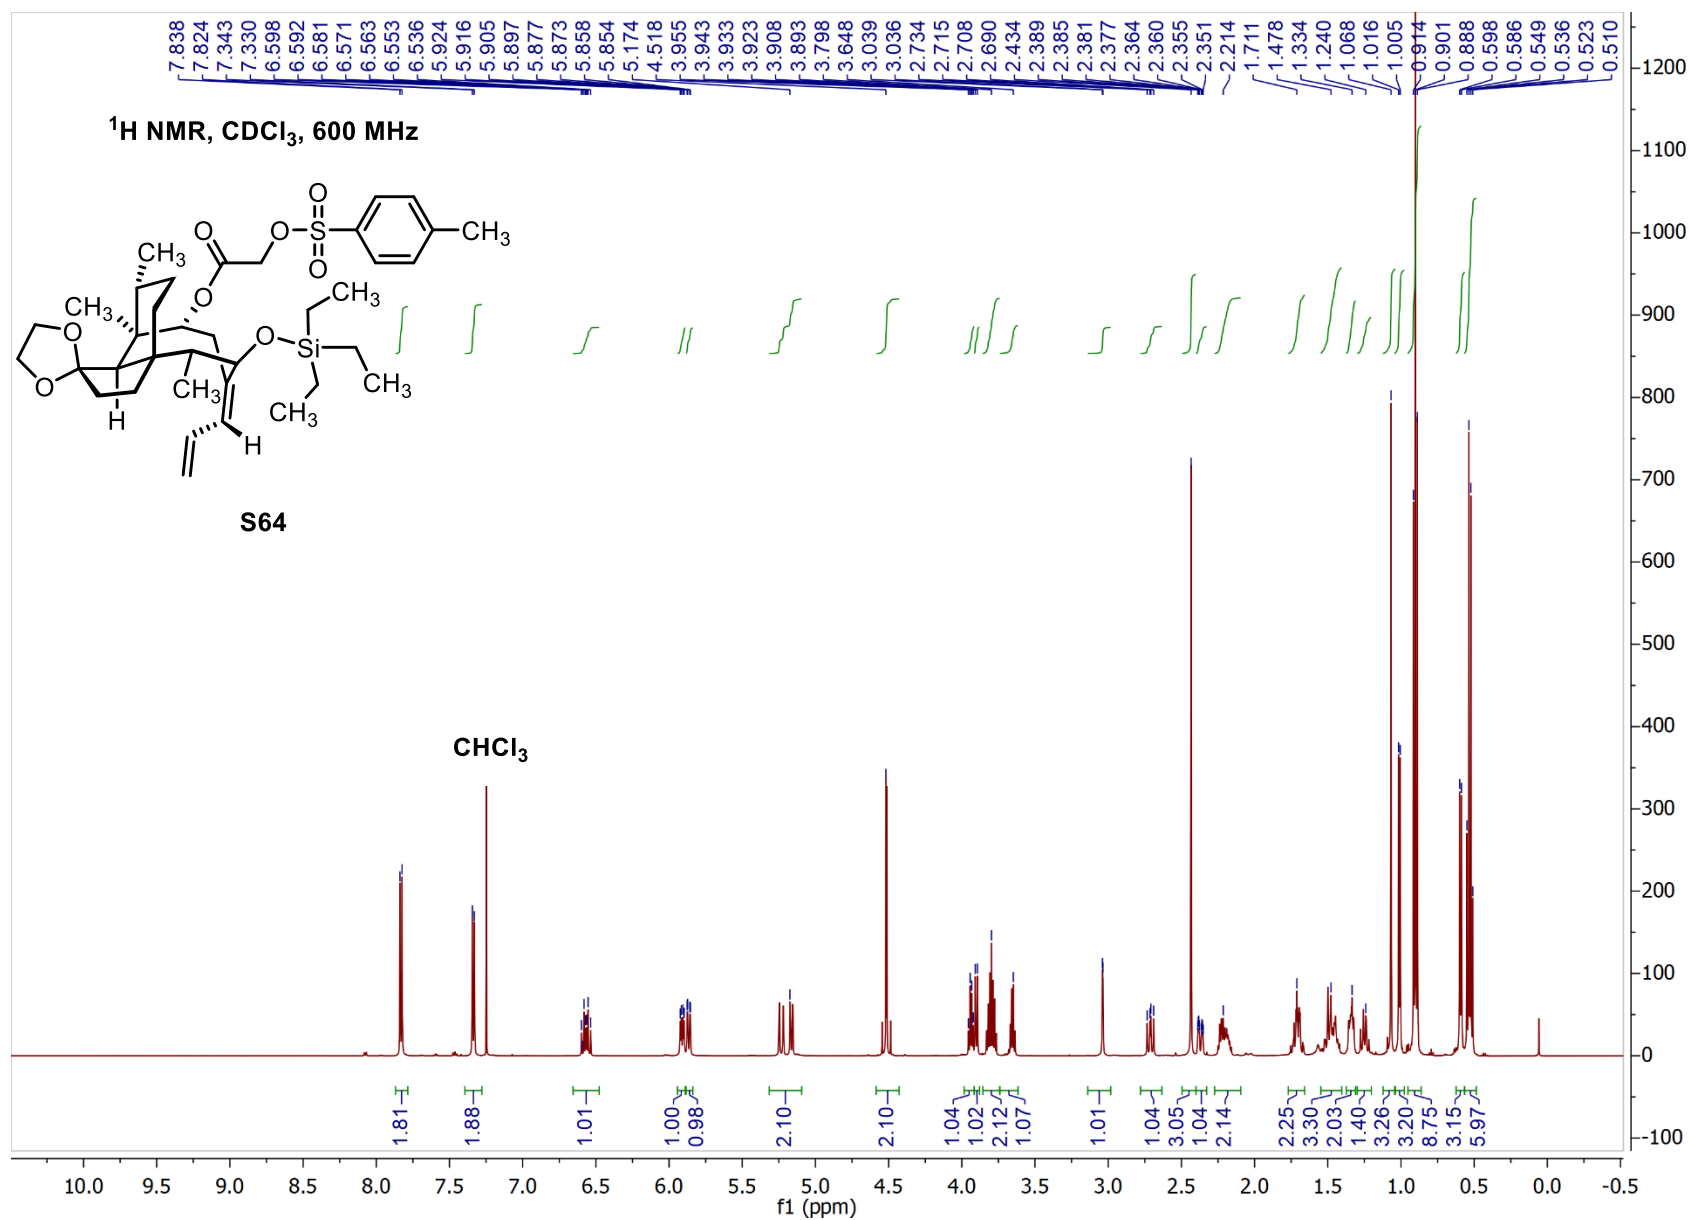

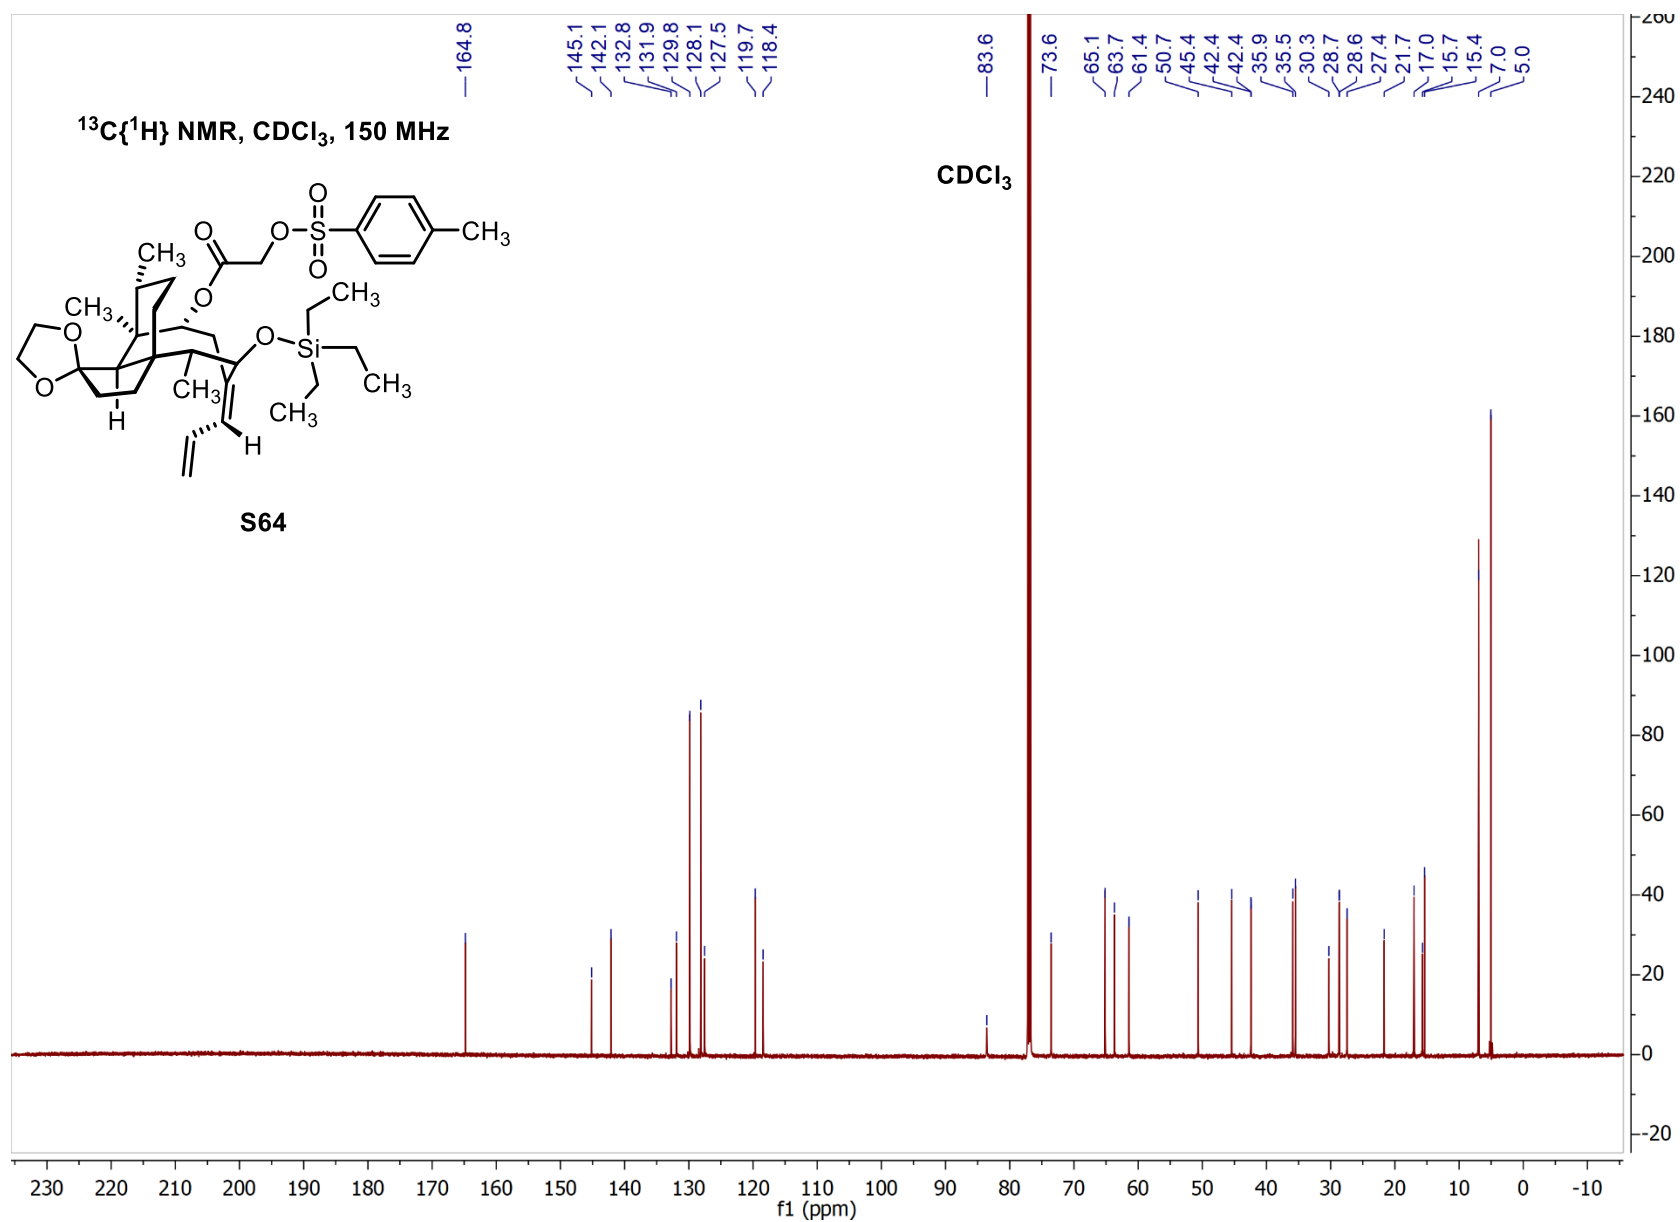

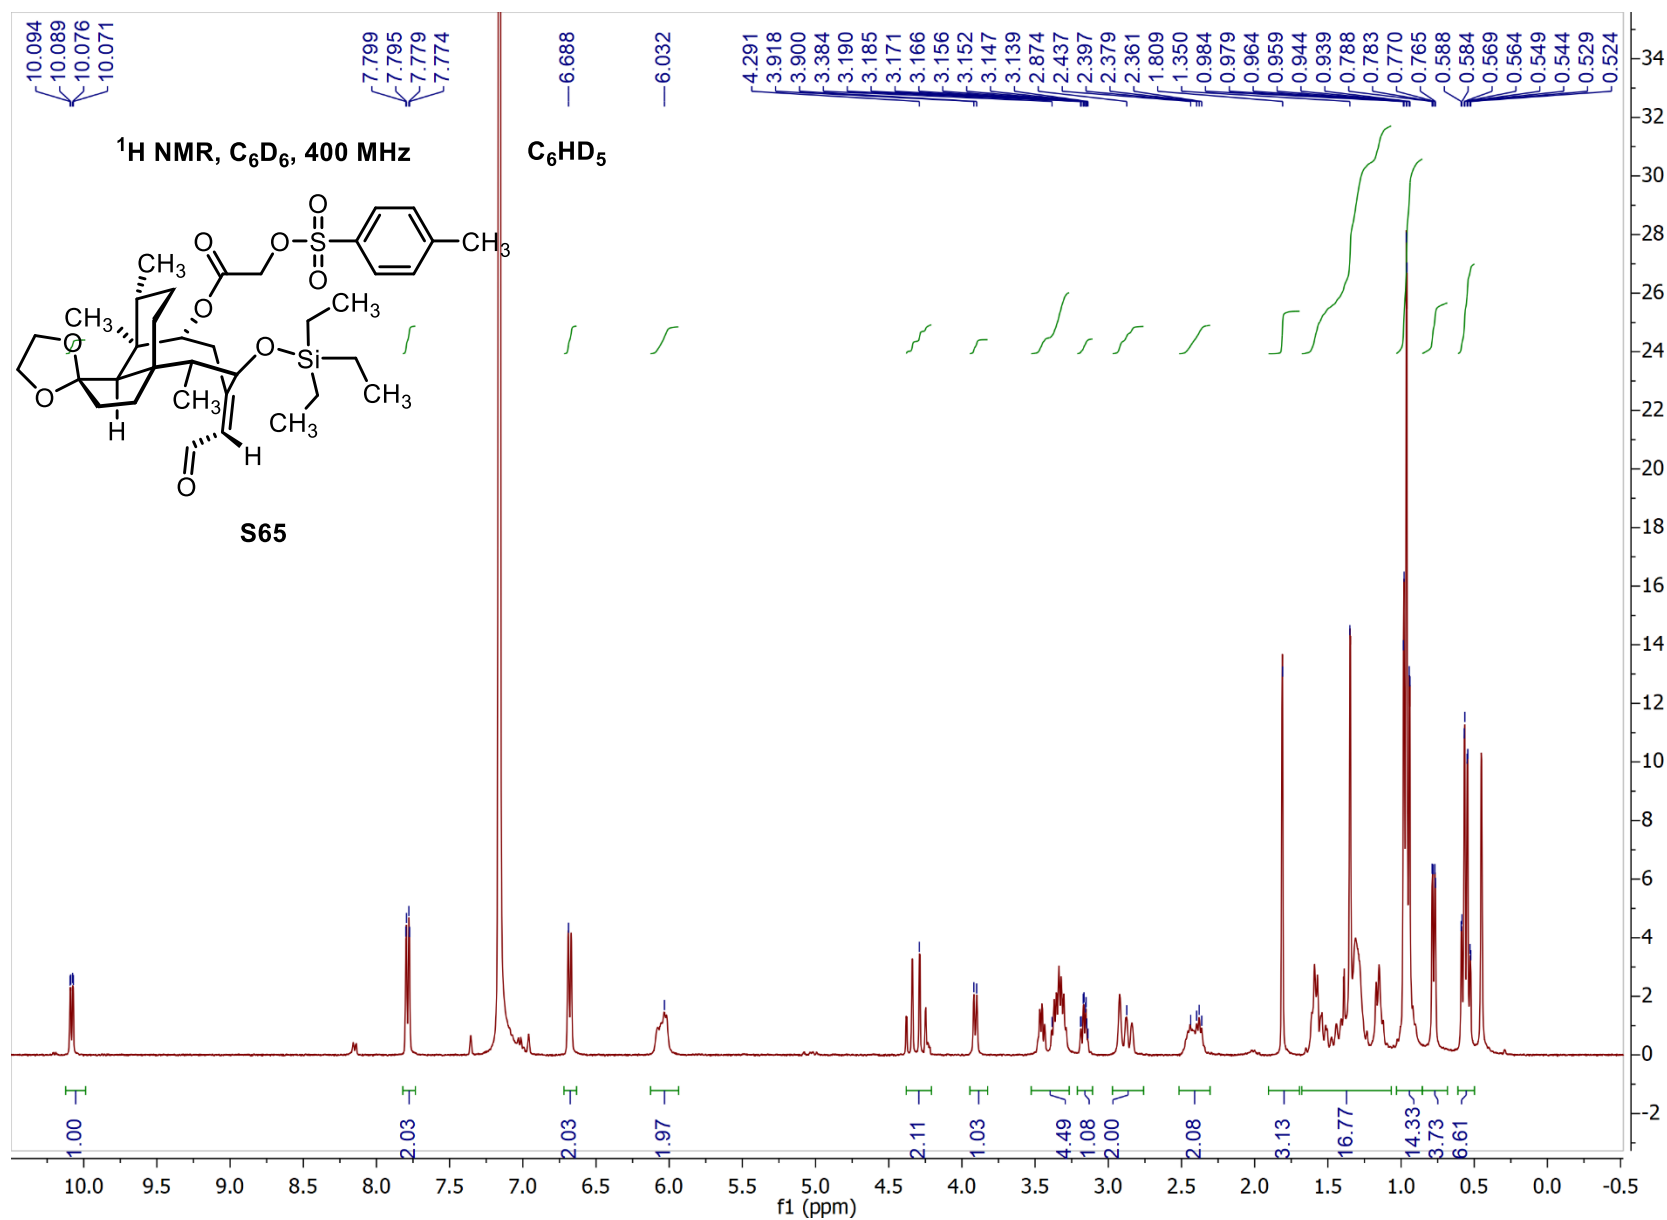



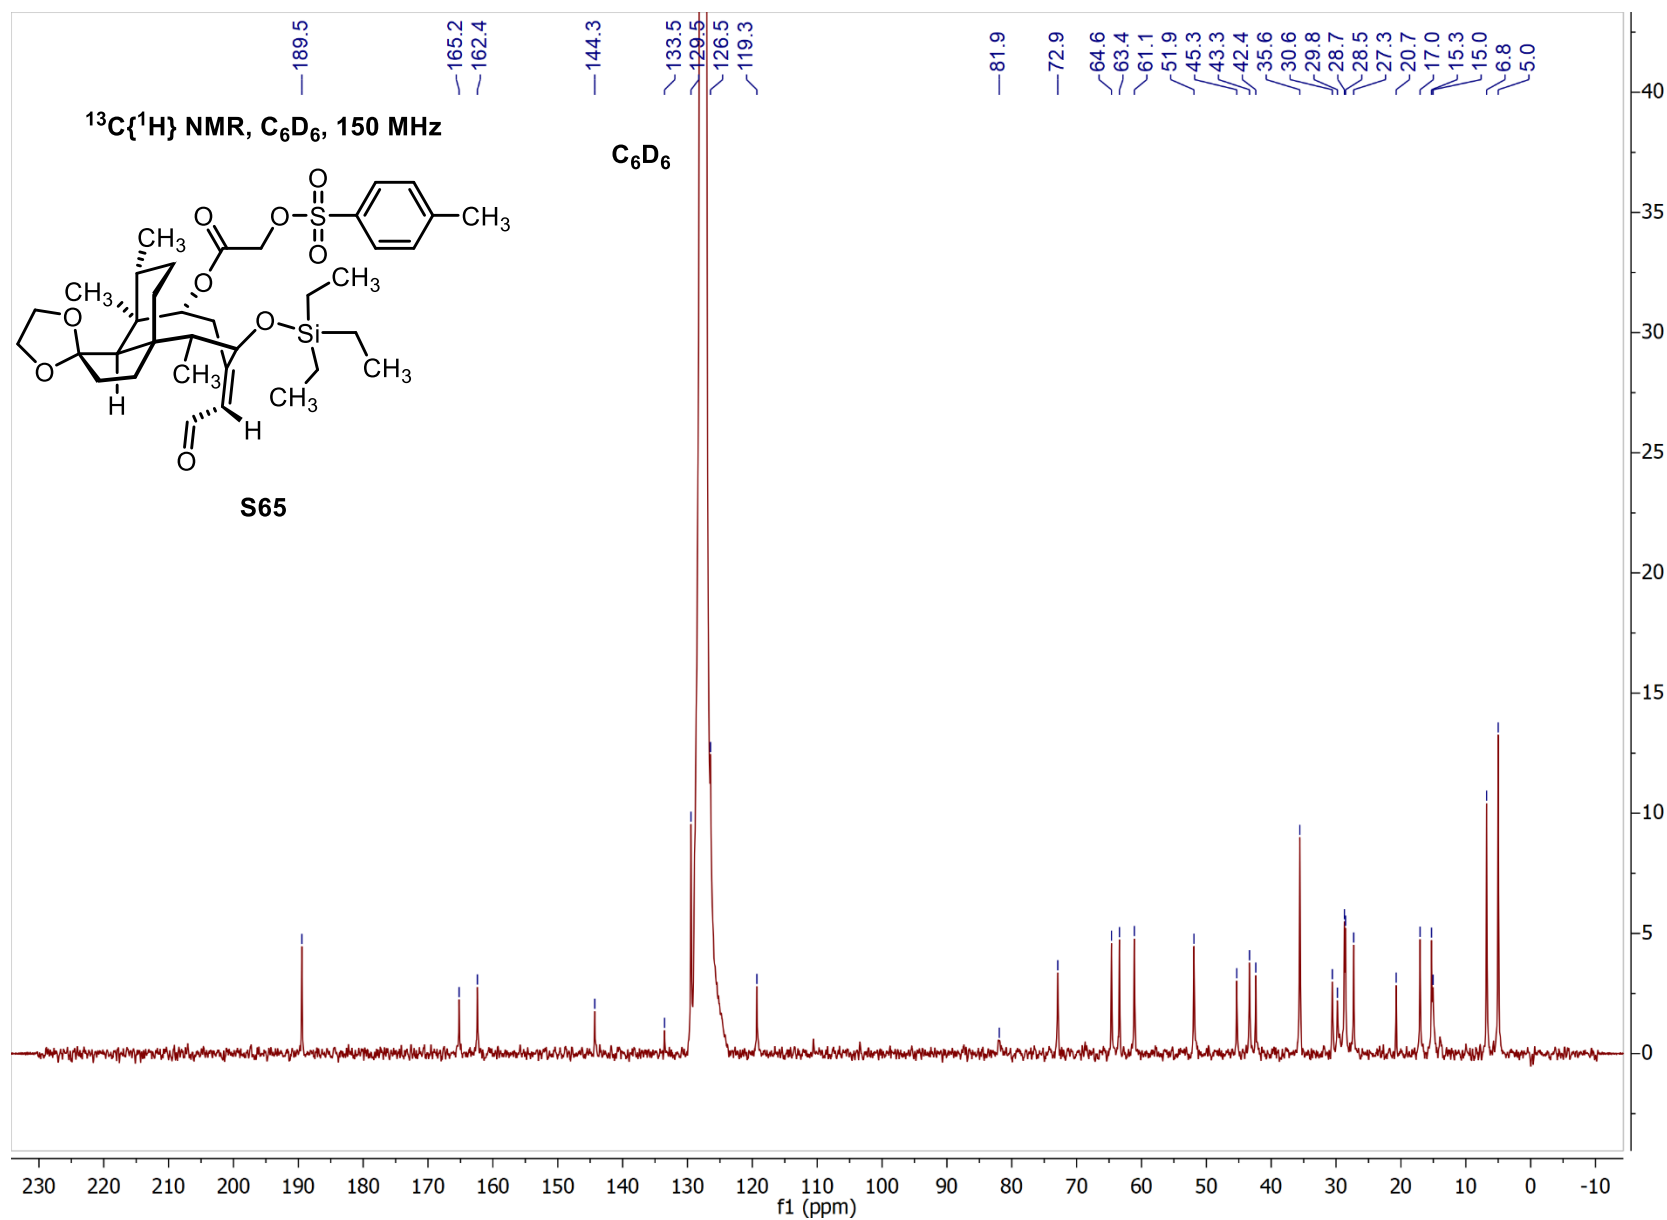

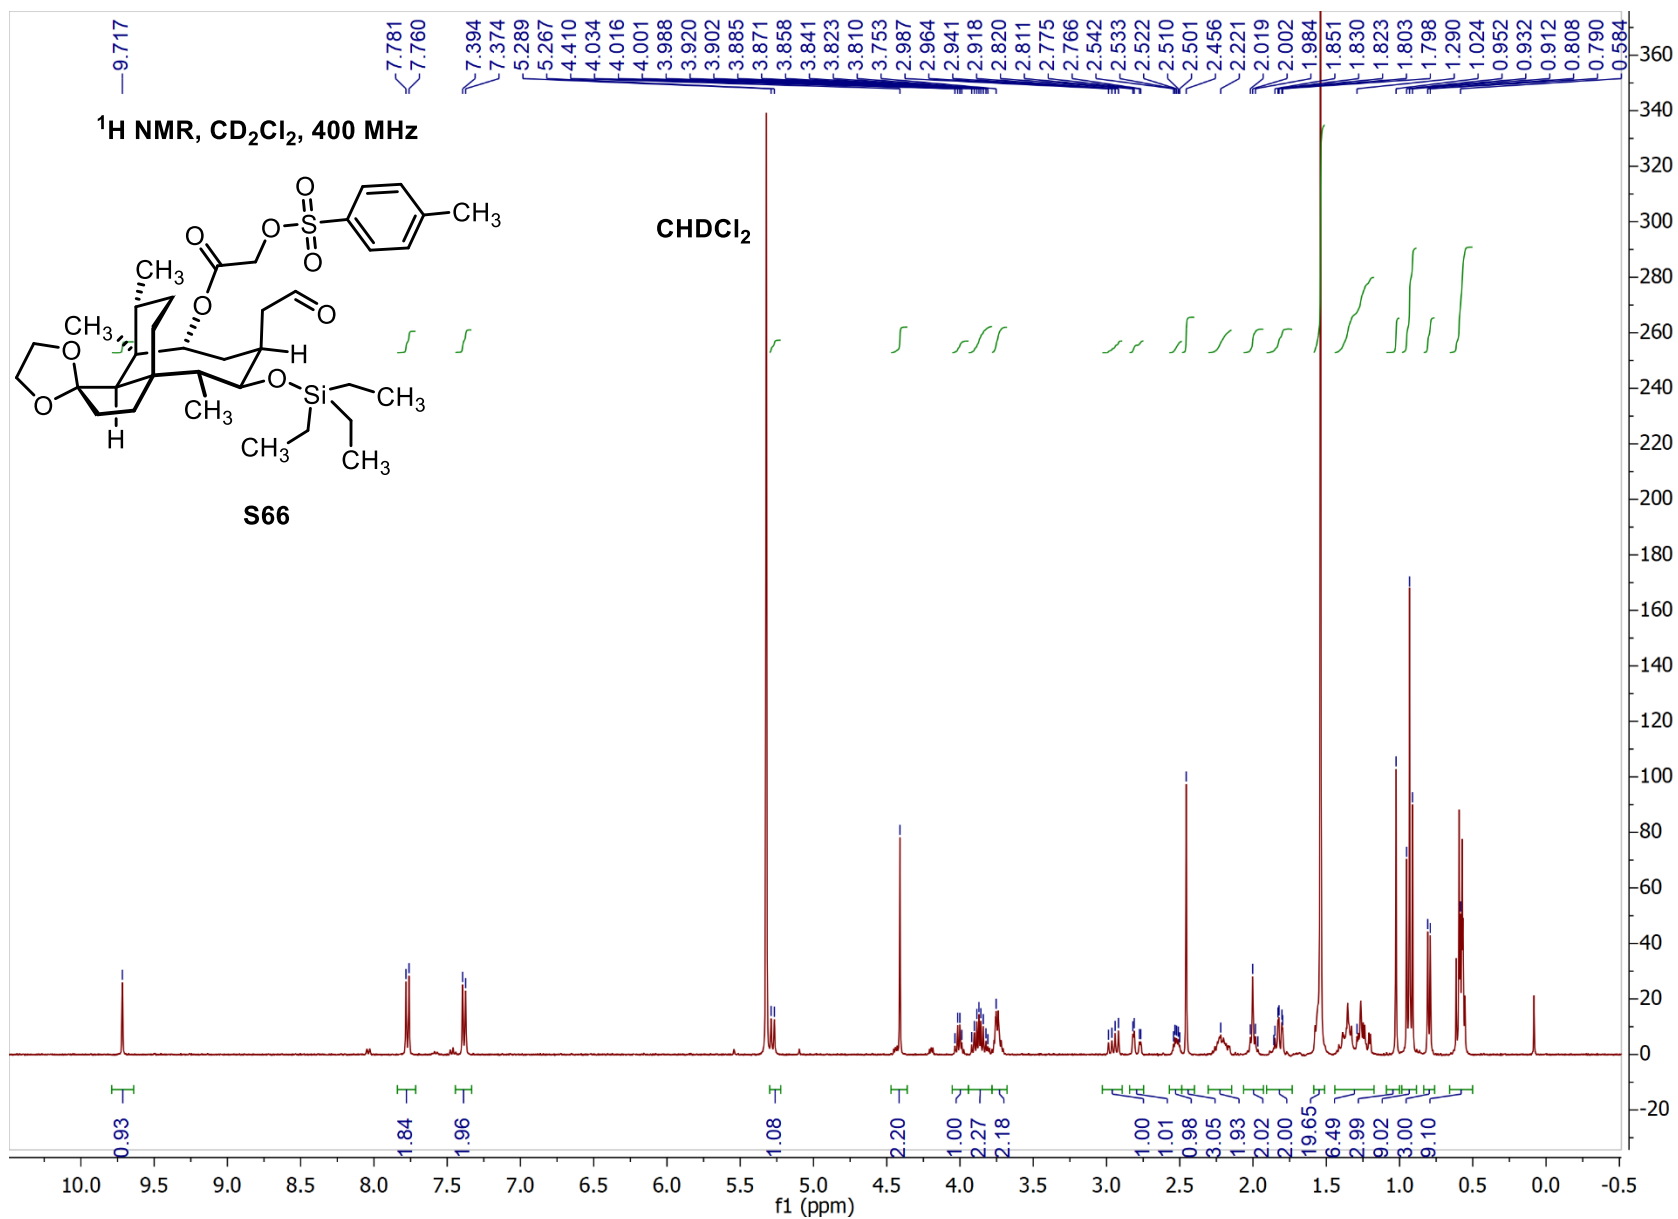

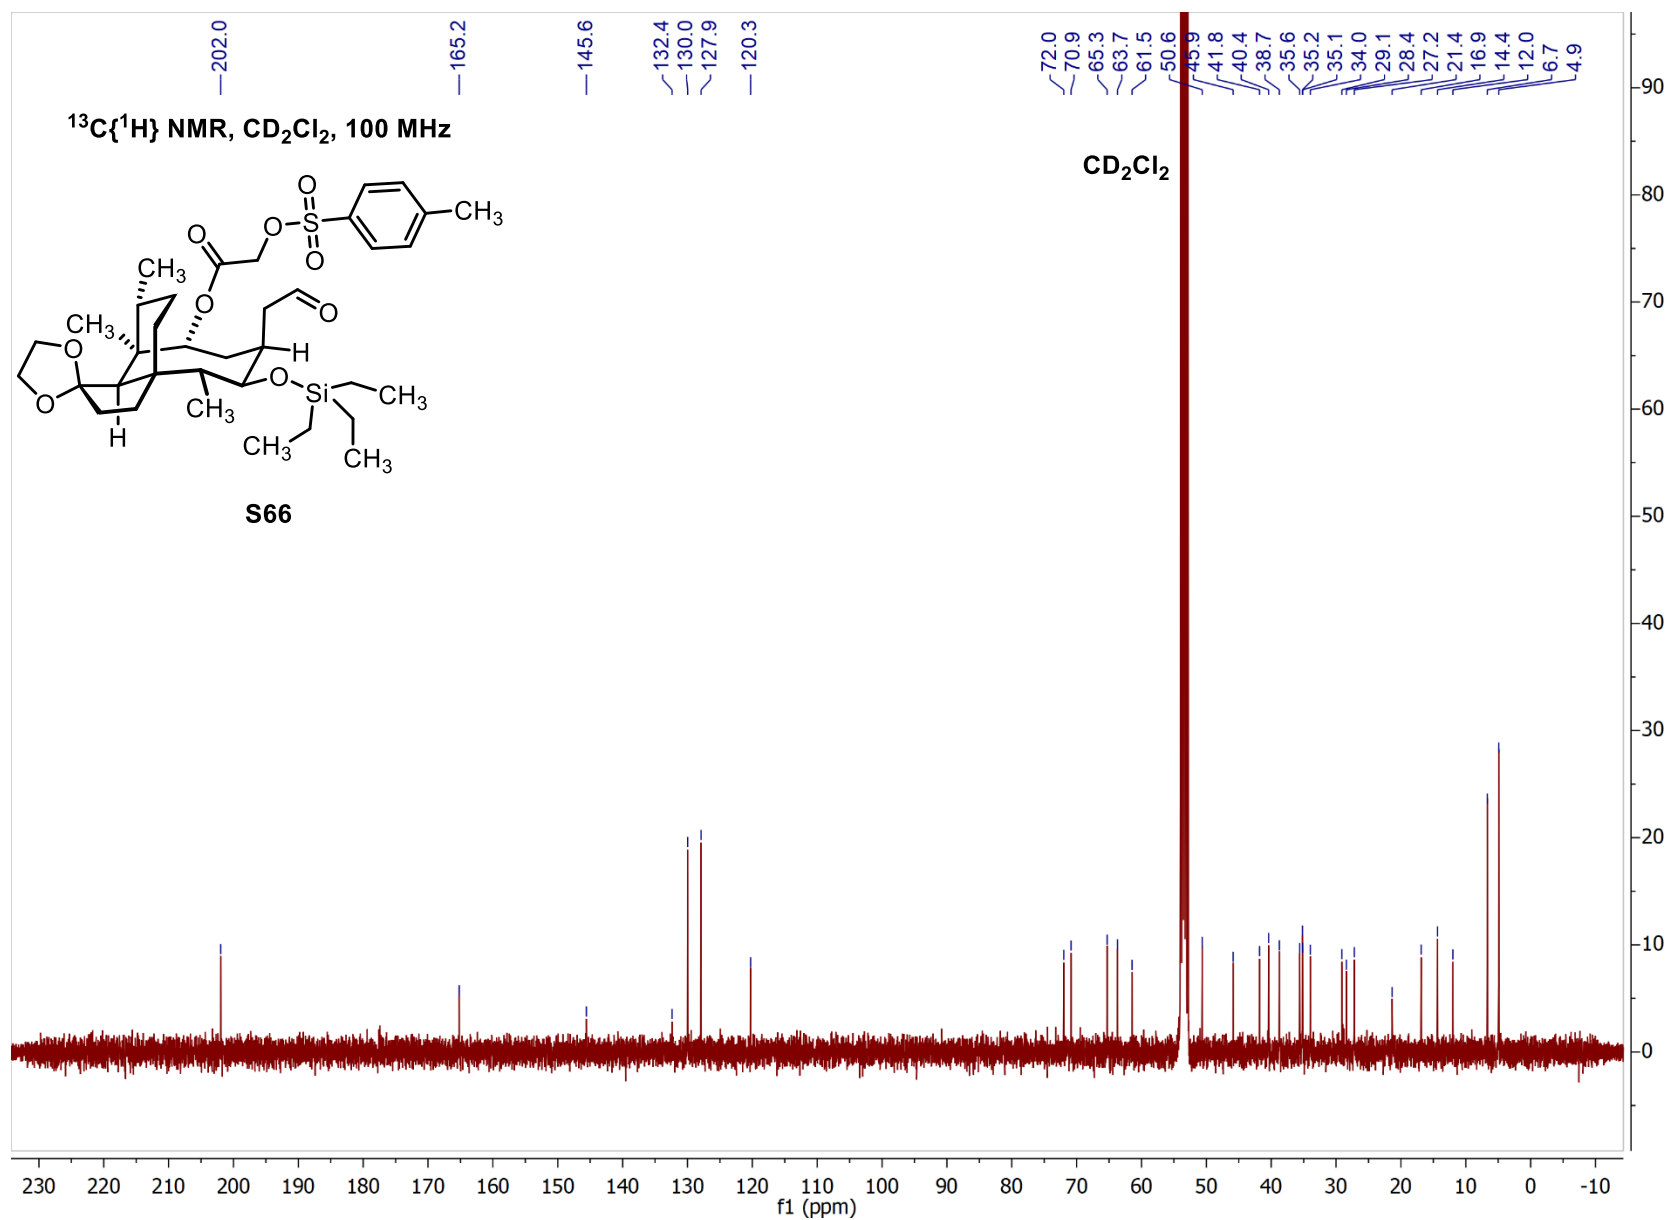

S66, NOESY, CD<sub>2</sub>Cl<sub>2</sub>, 500 MHz

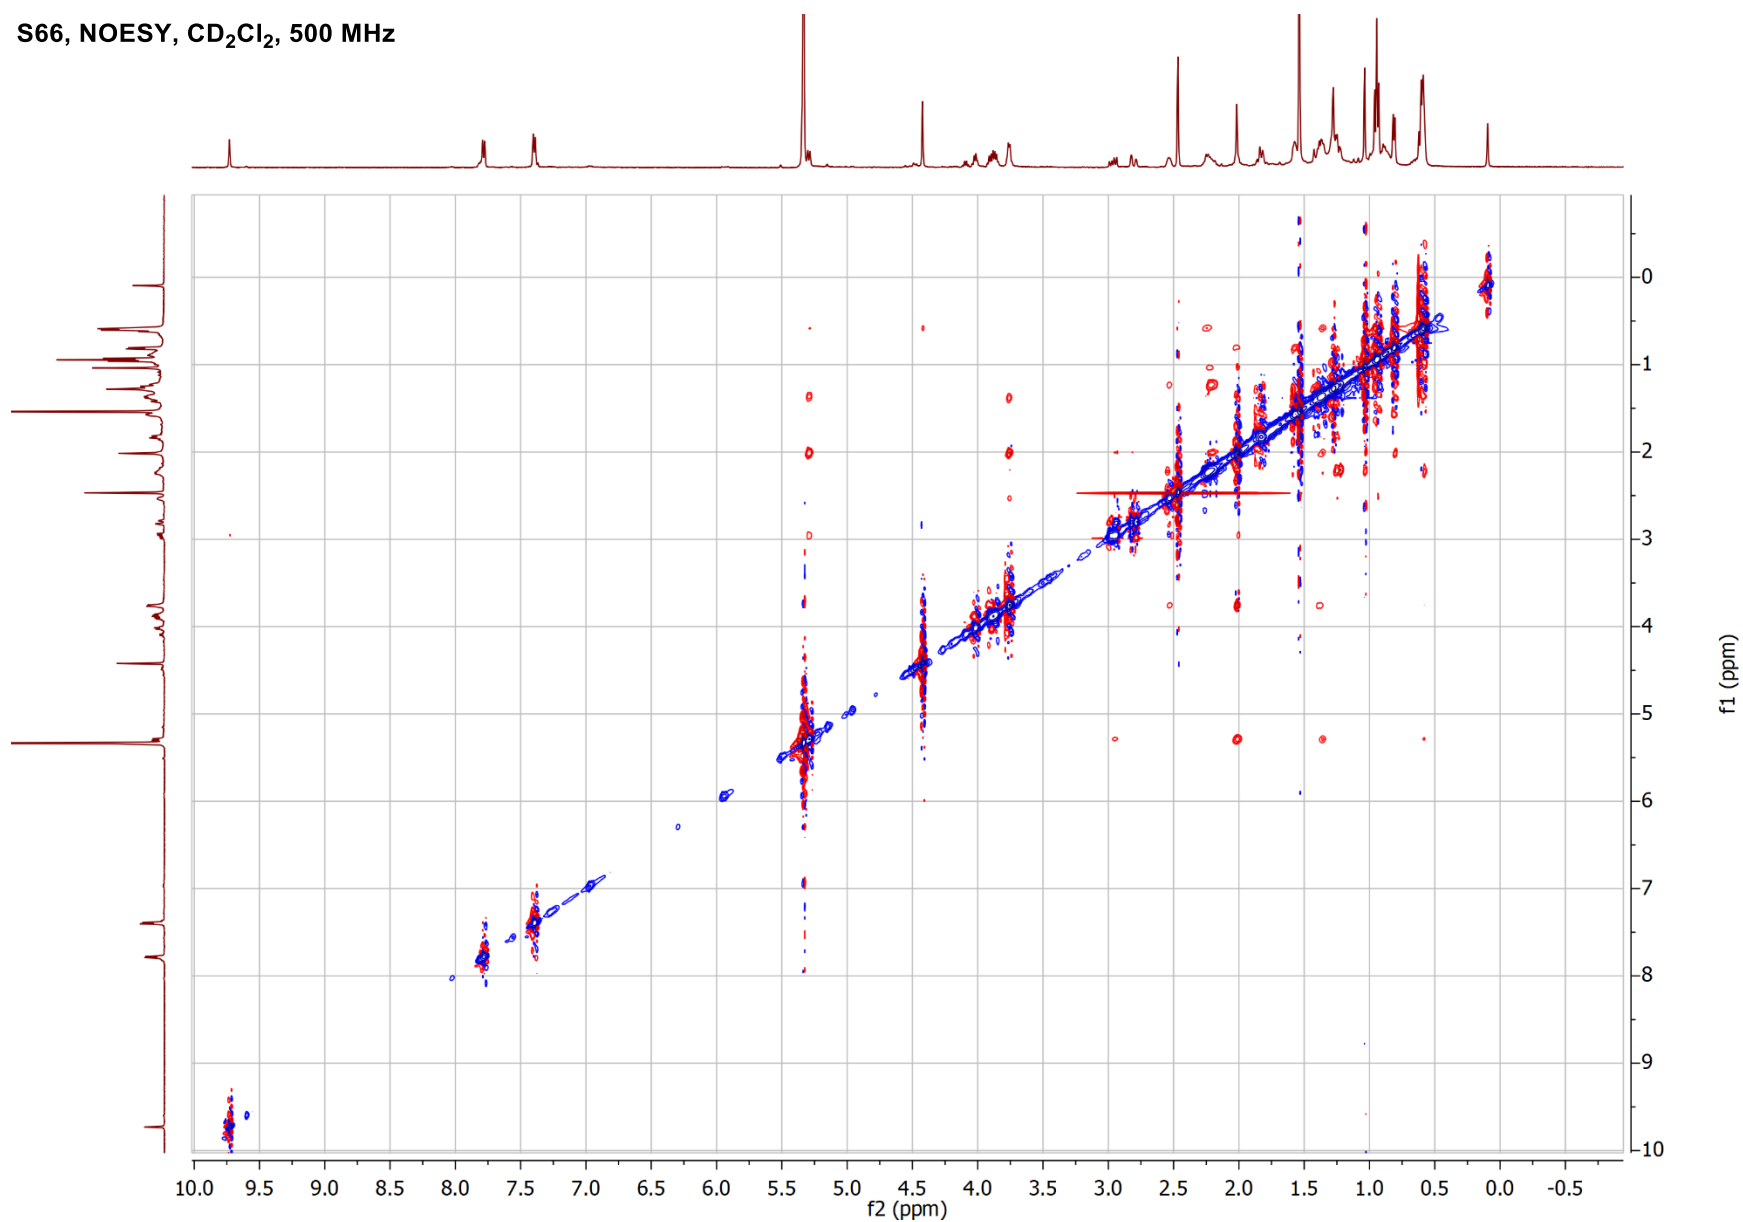

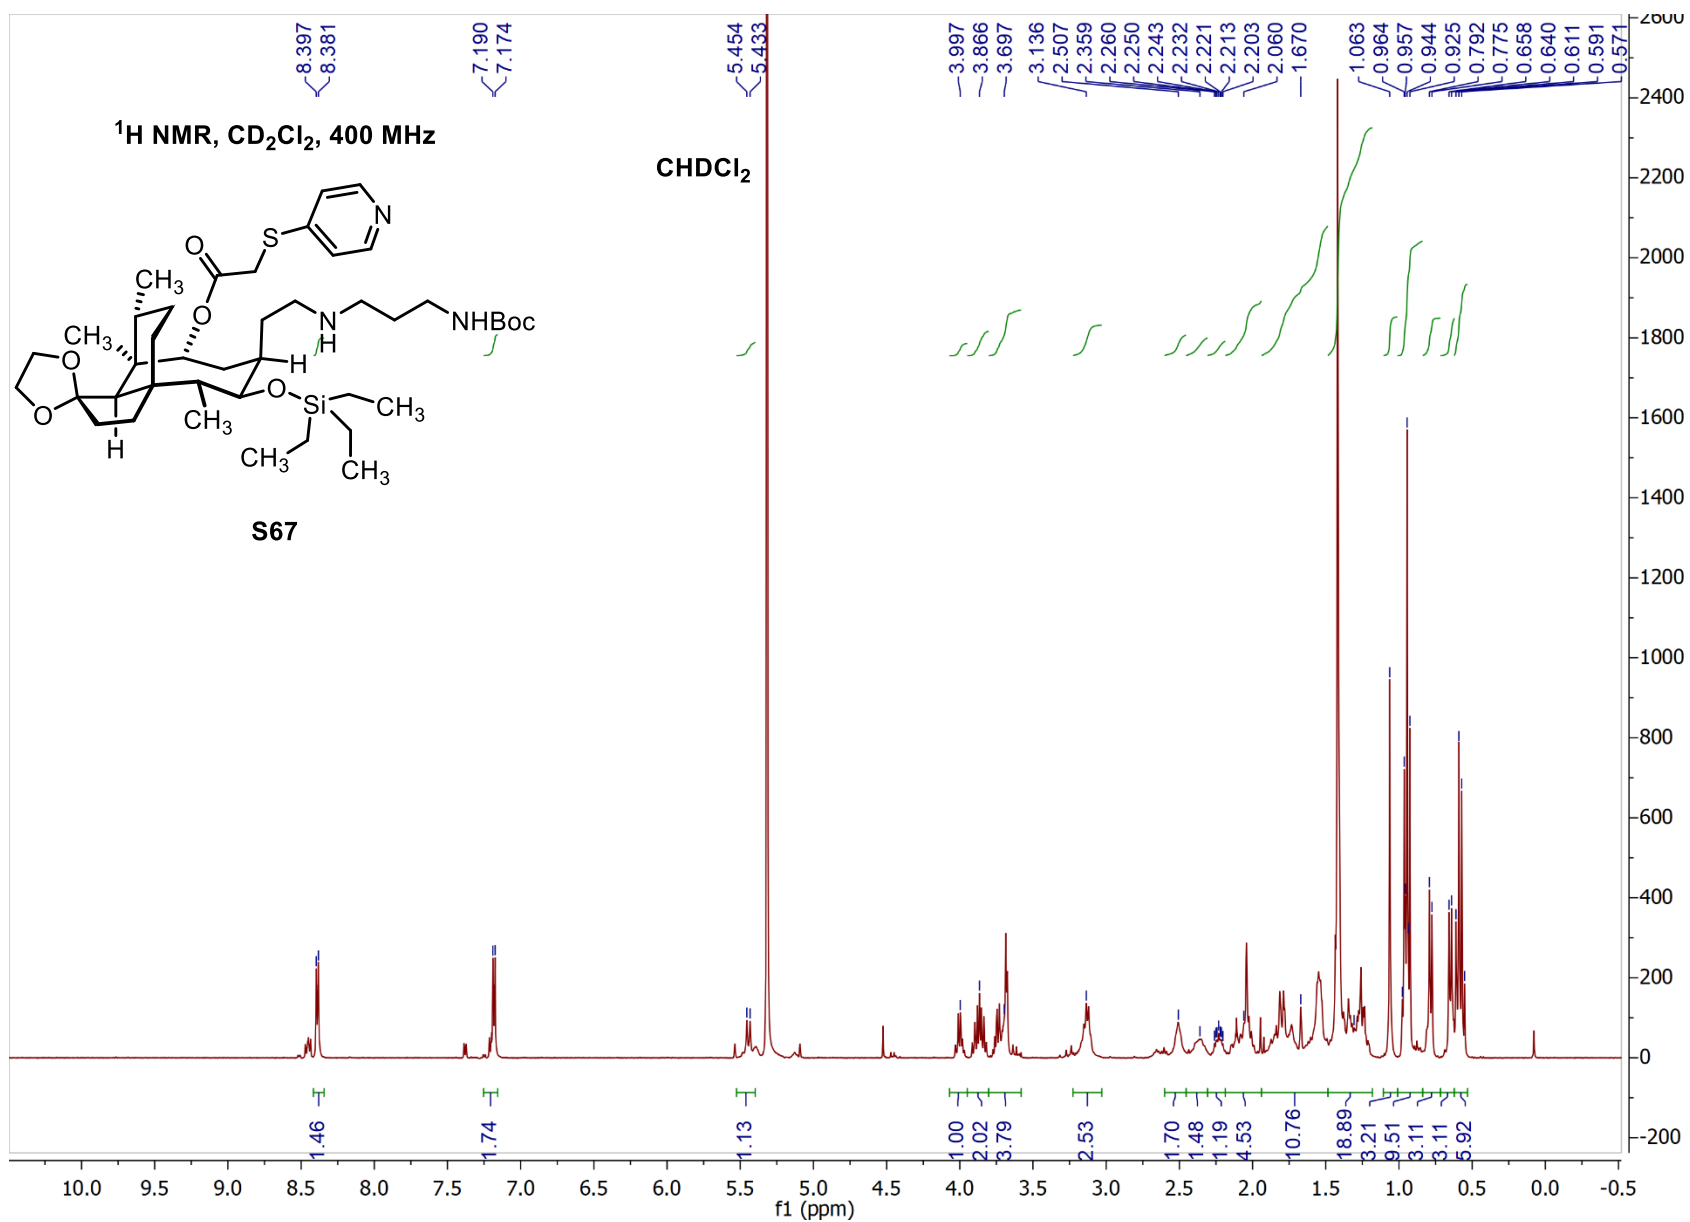

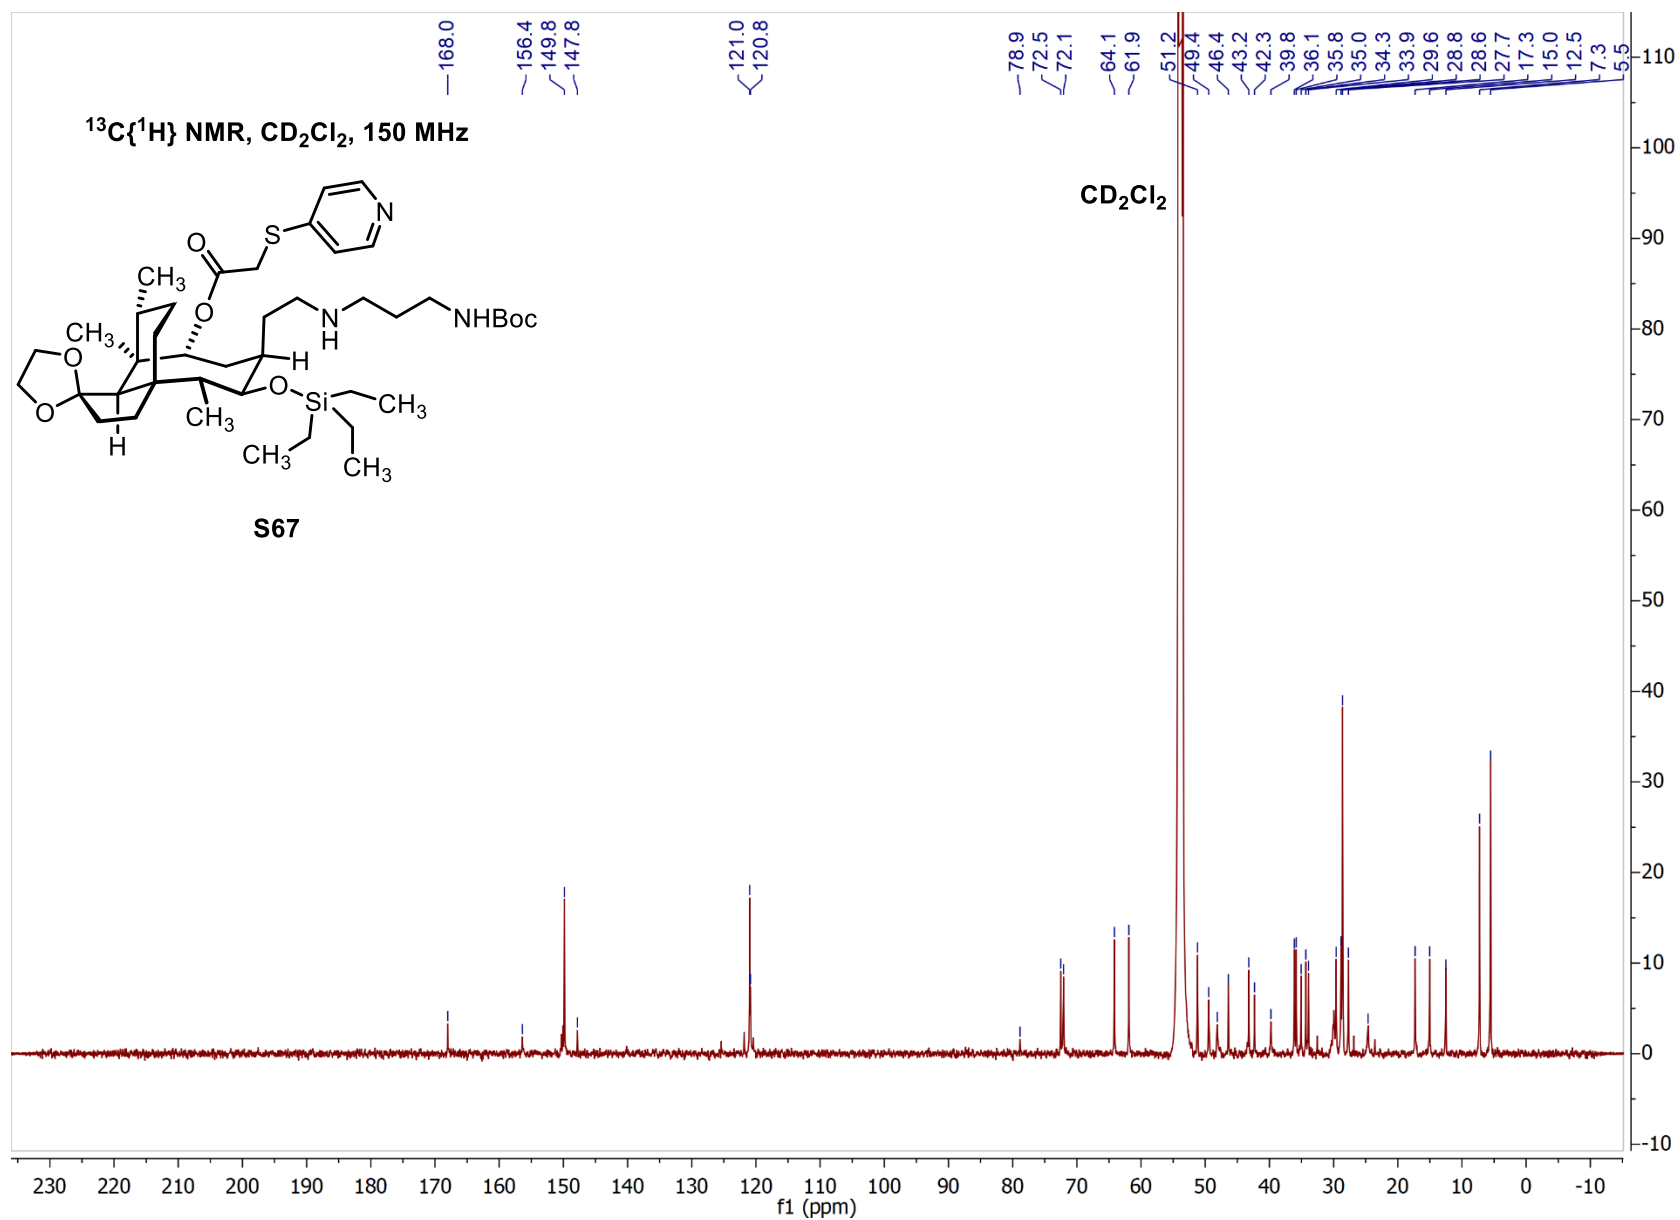

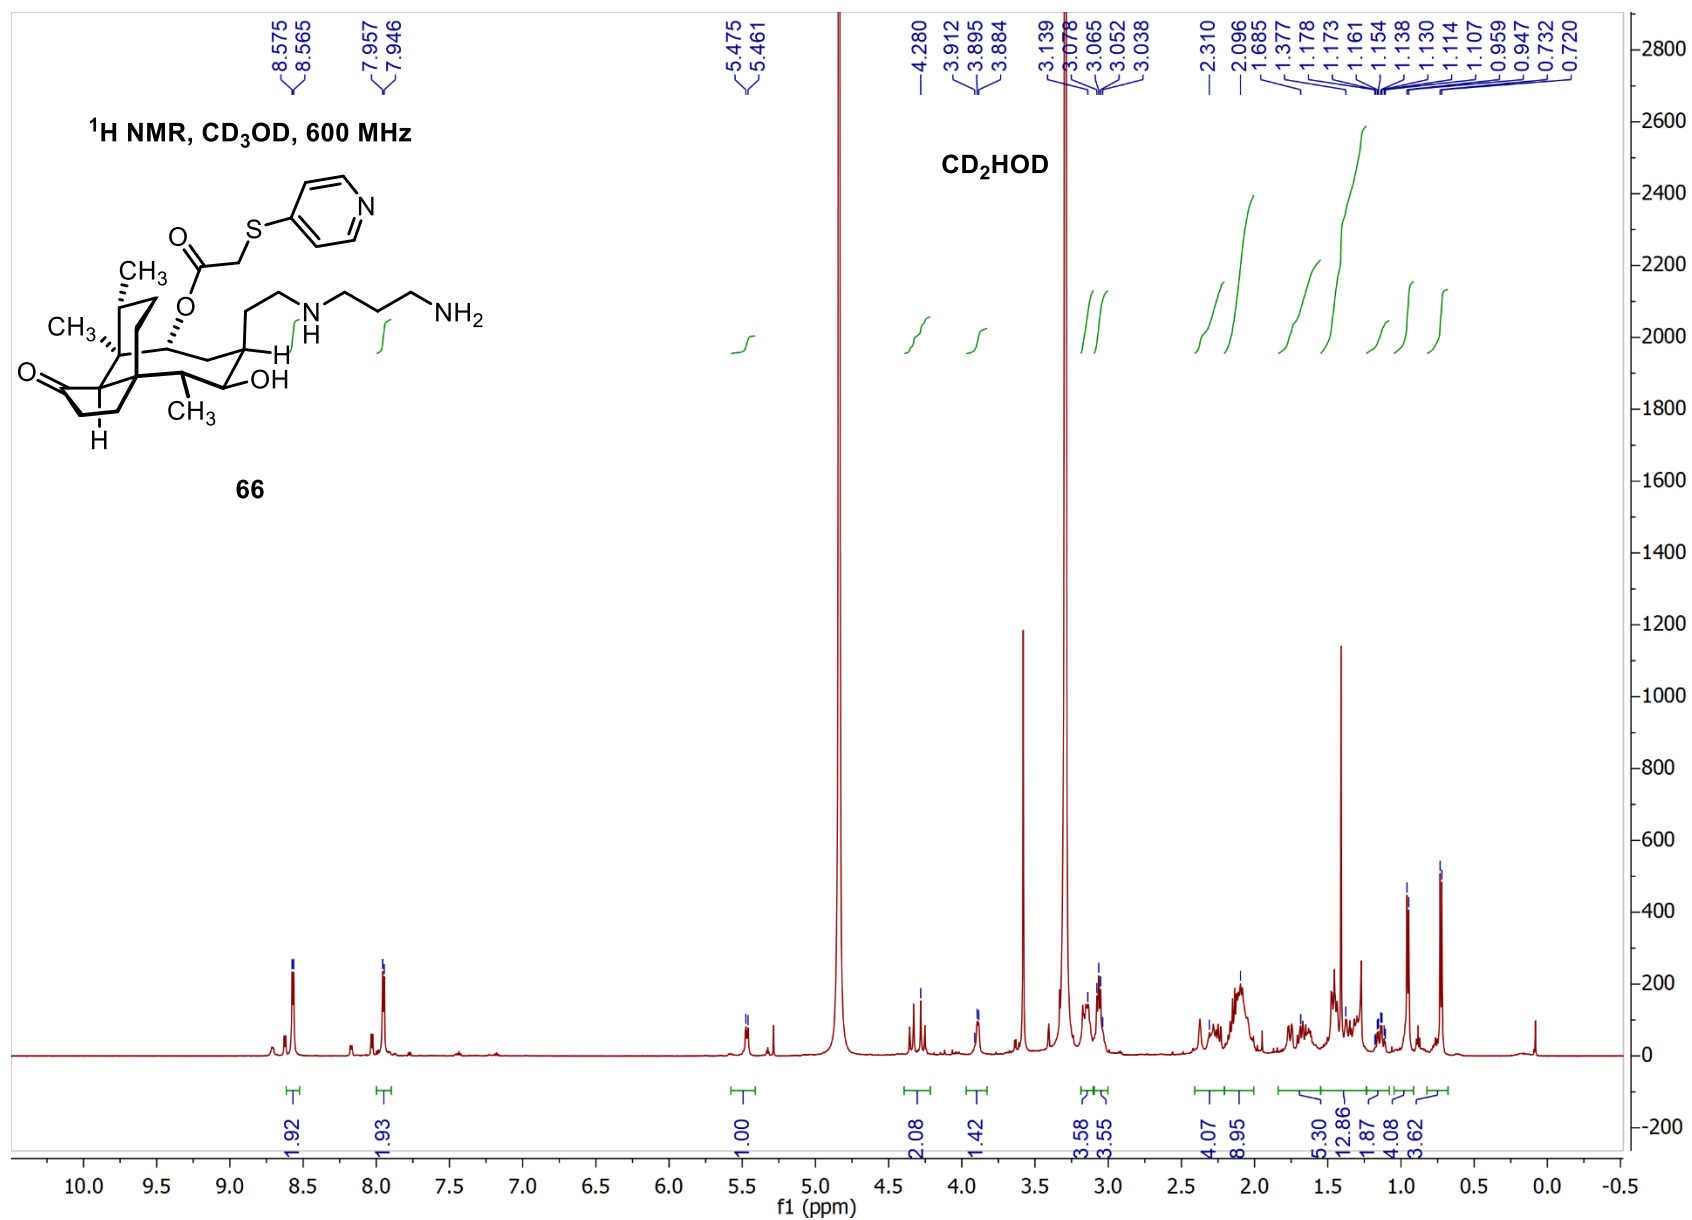

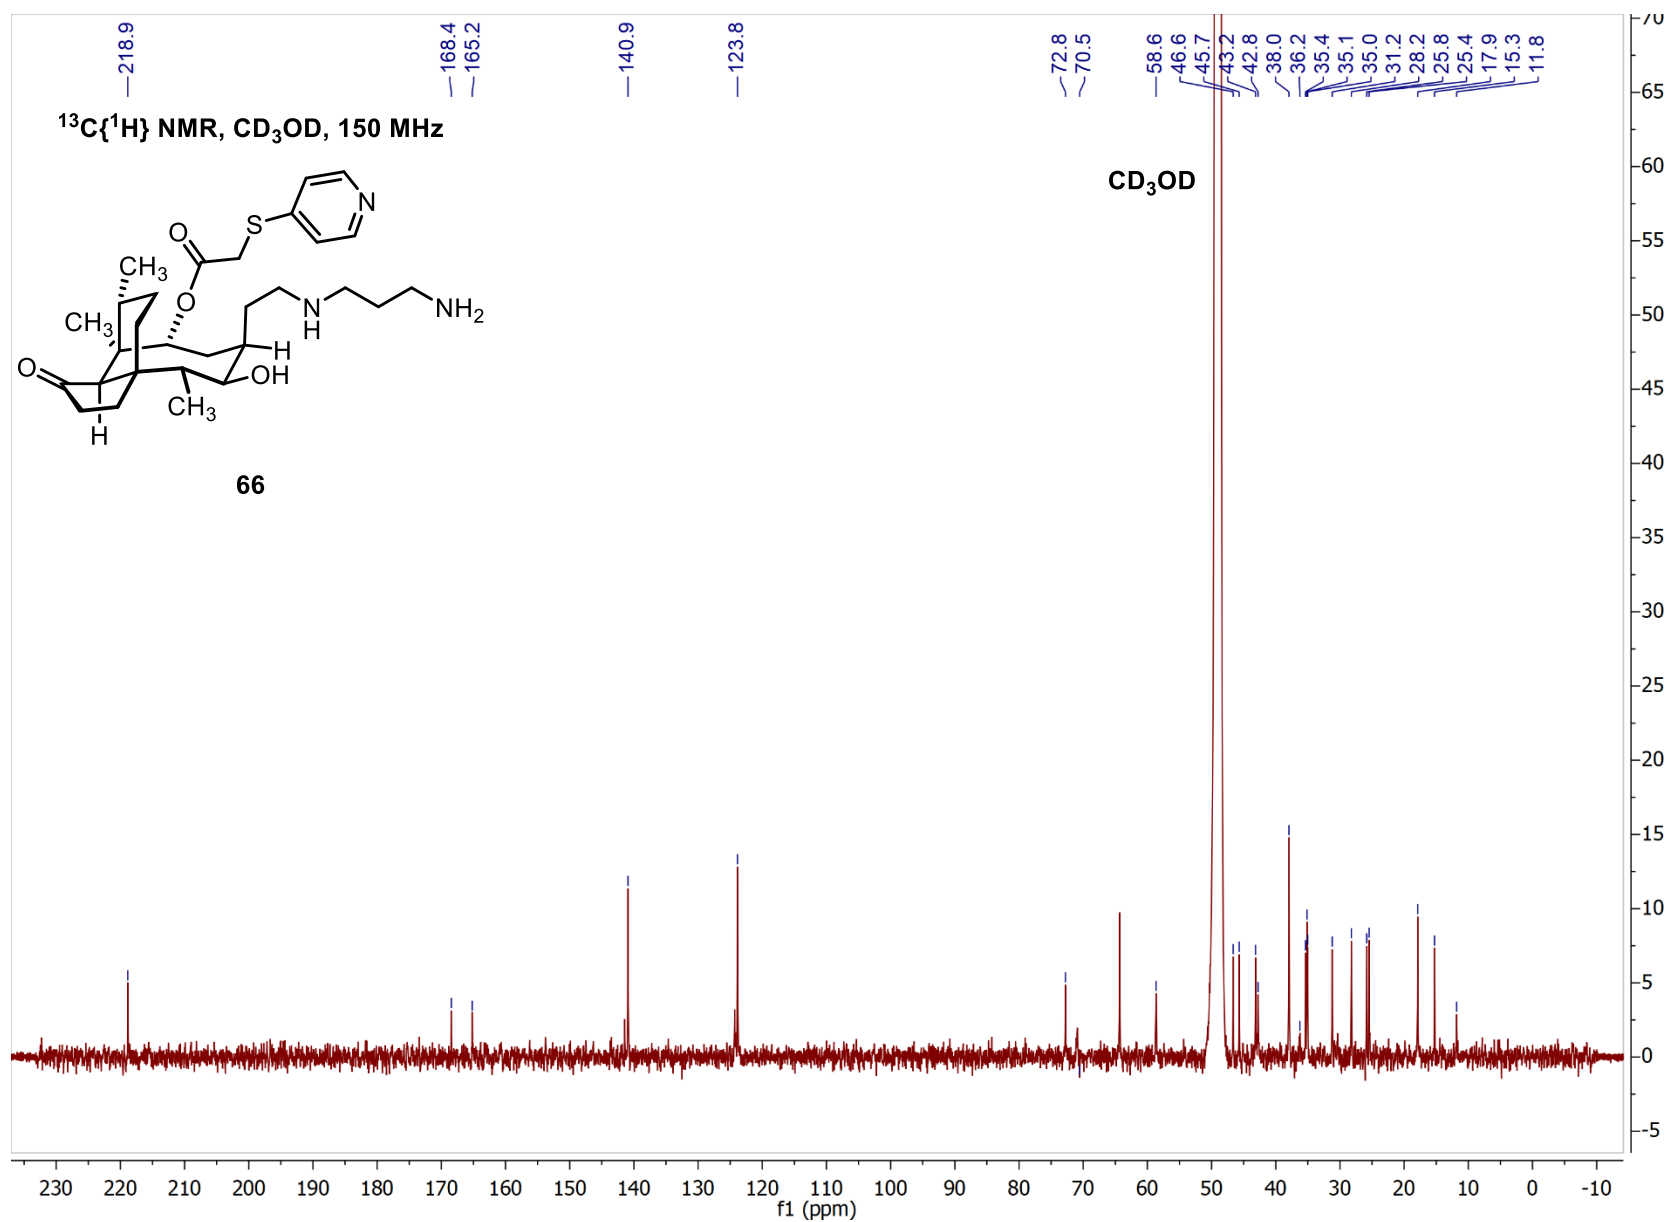



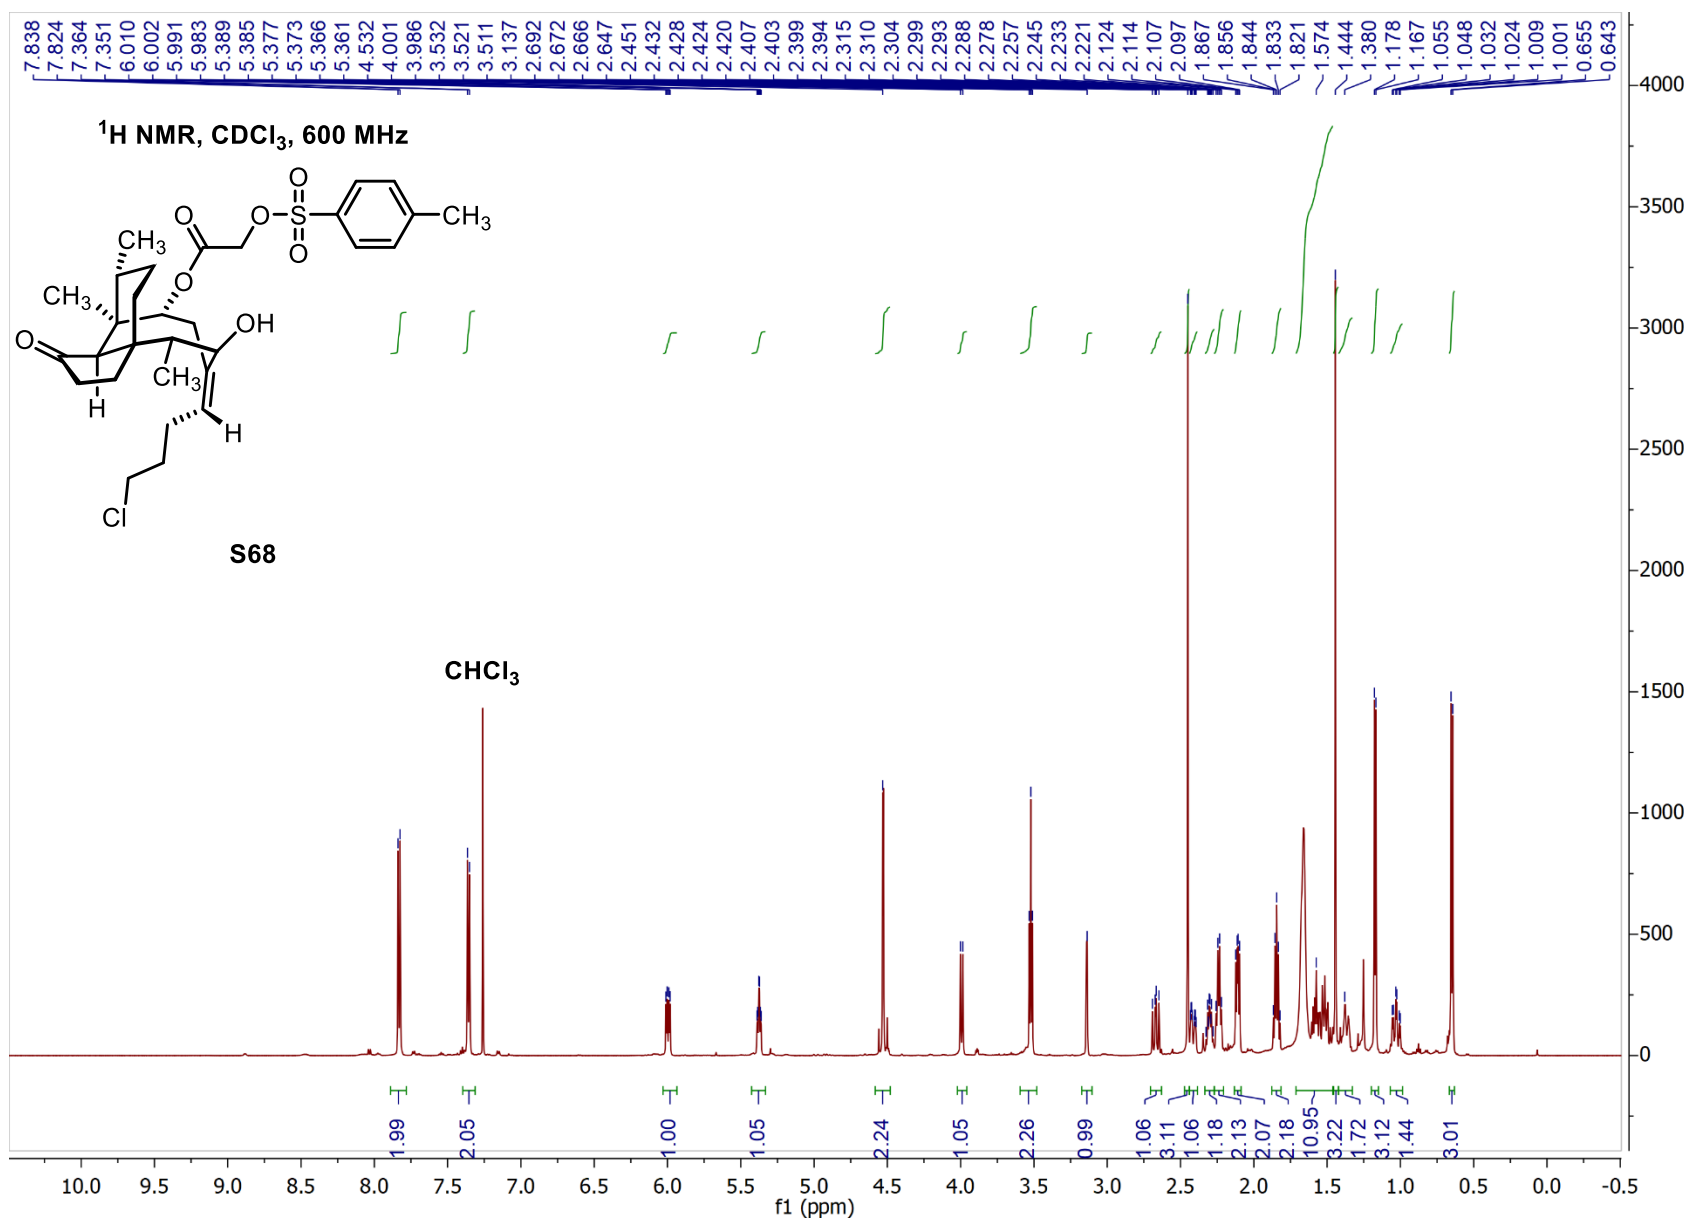

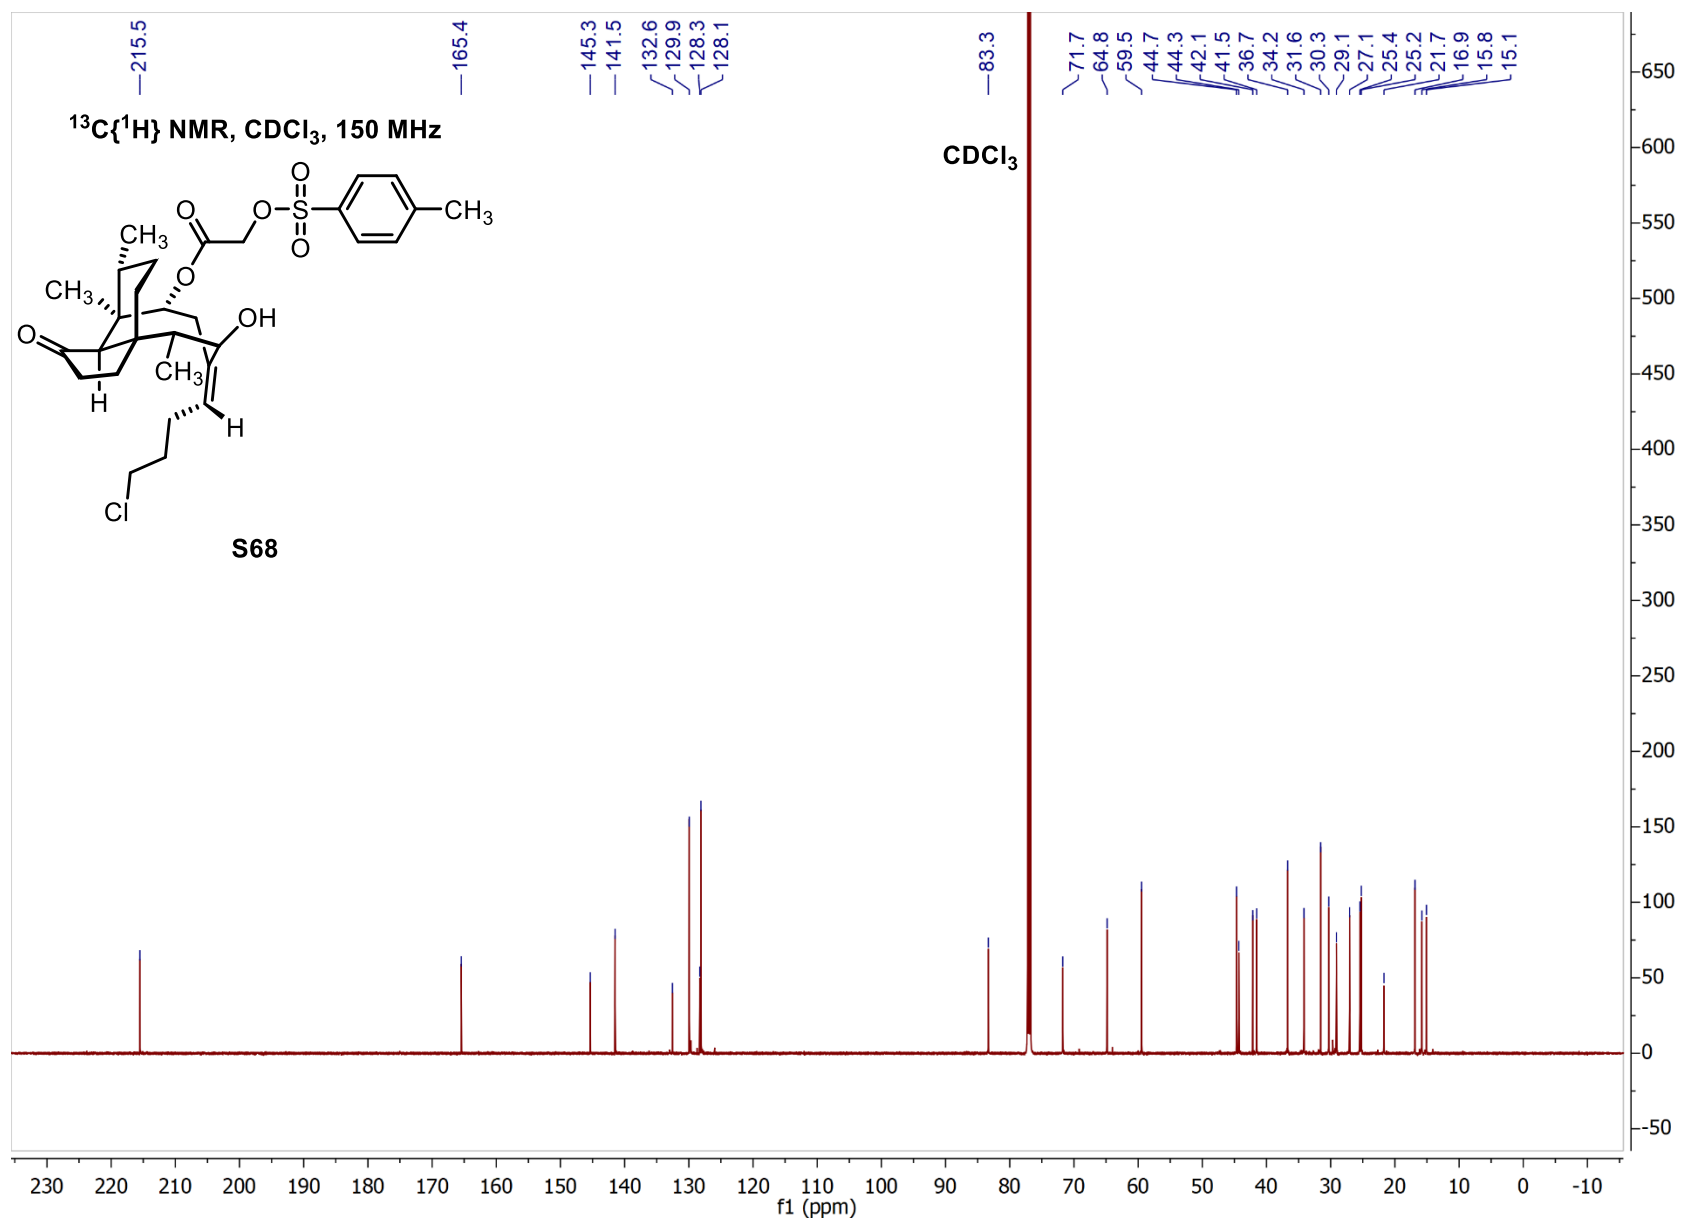

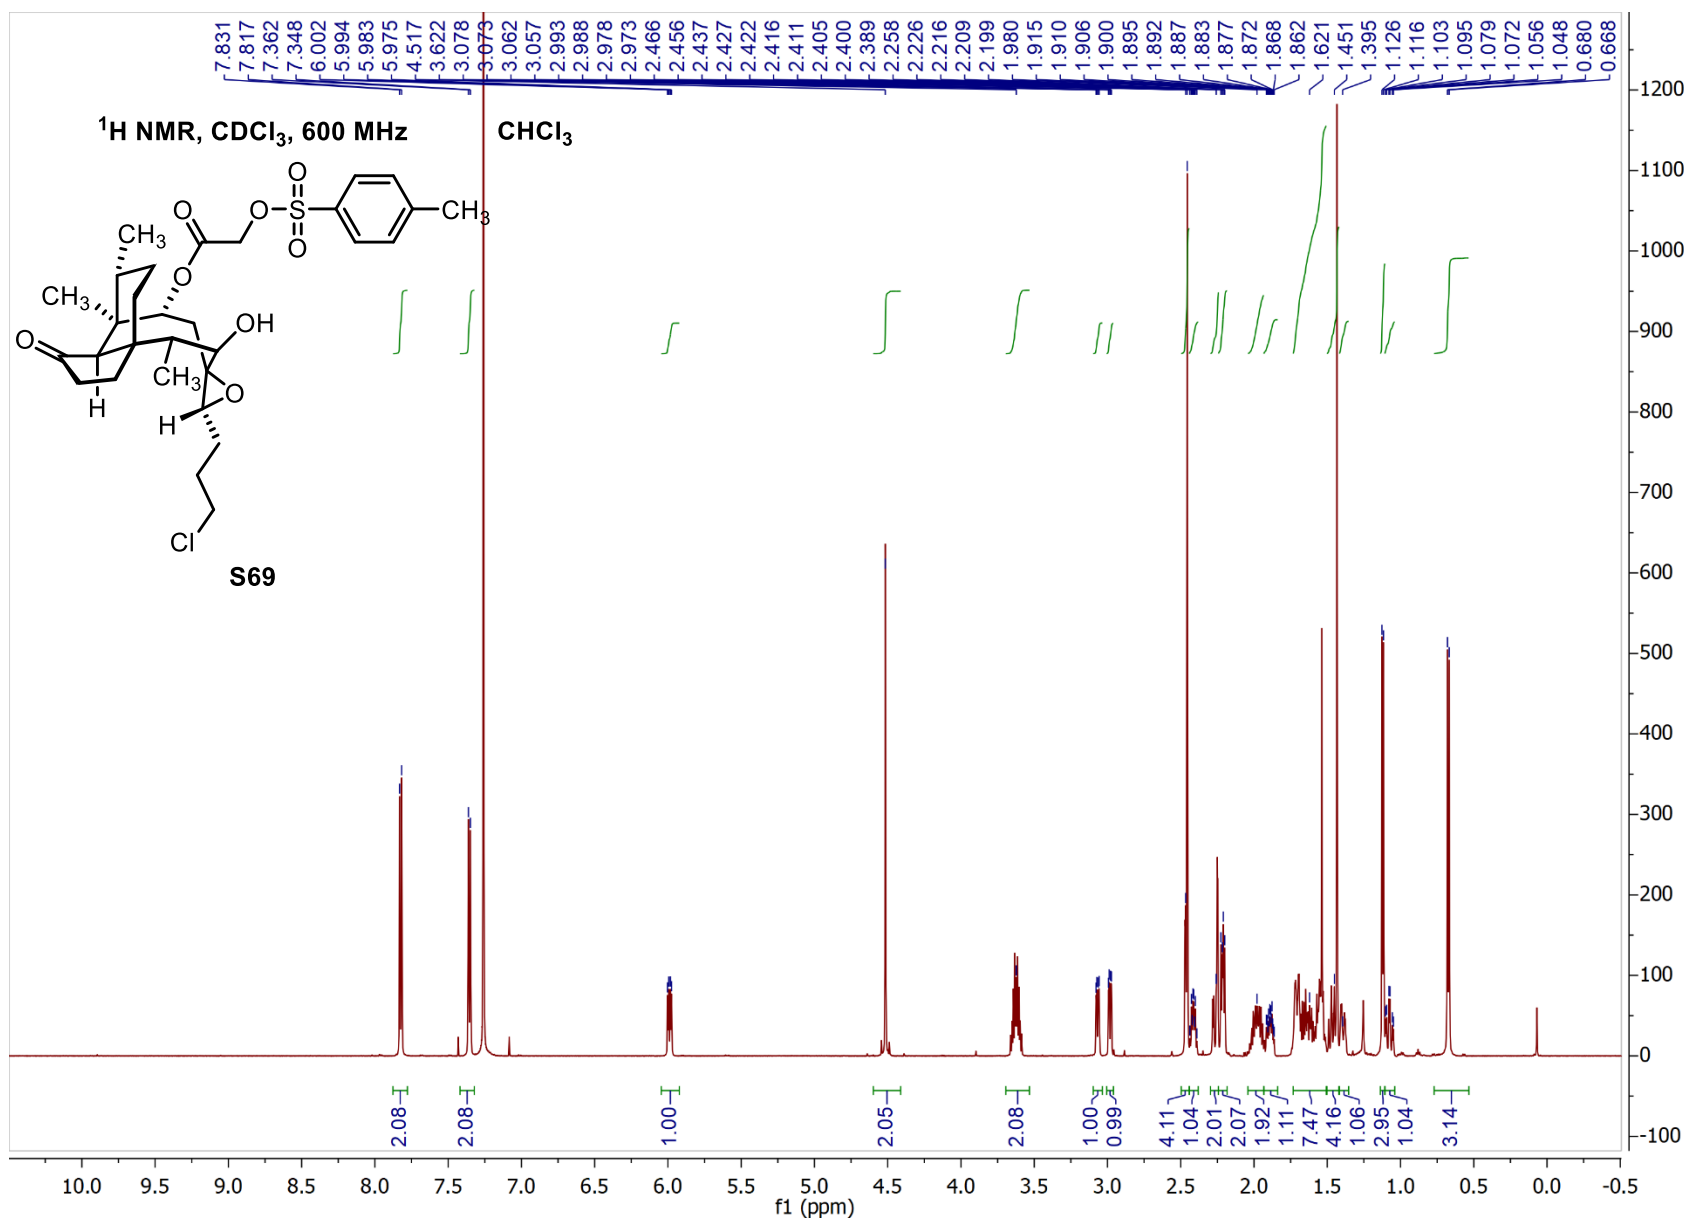

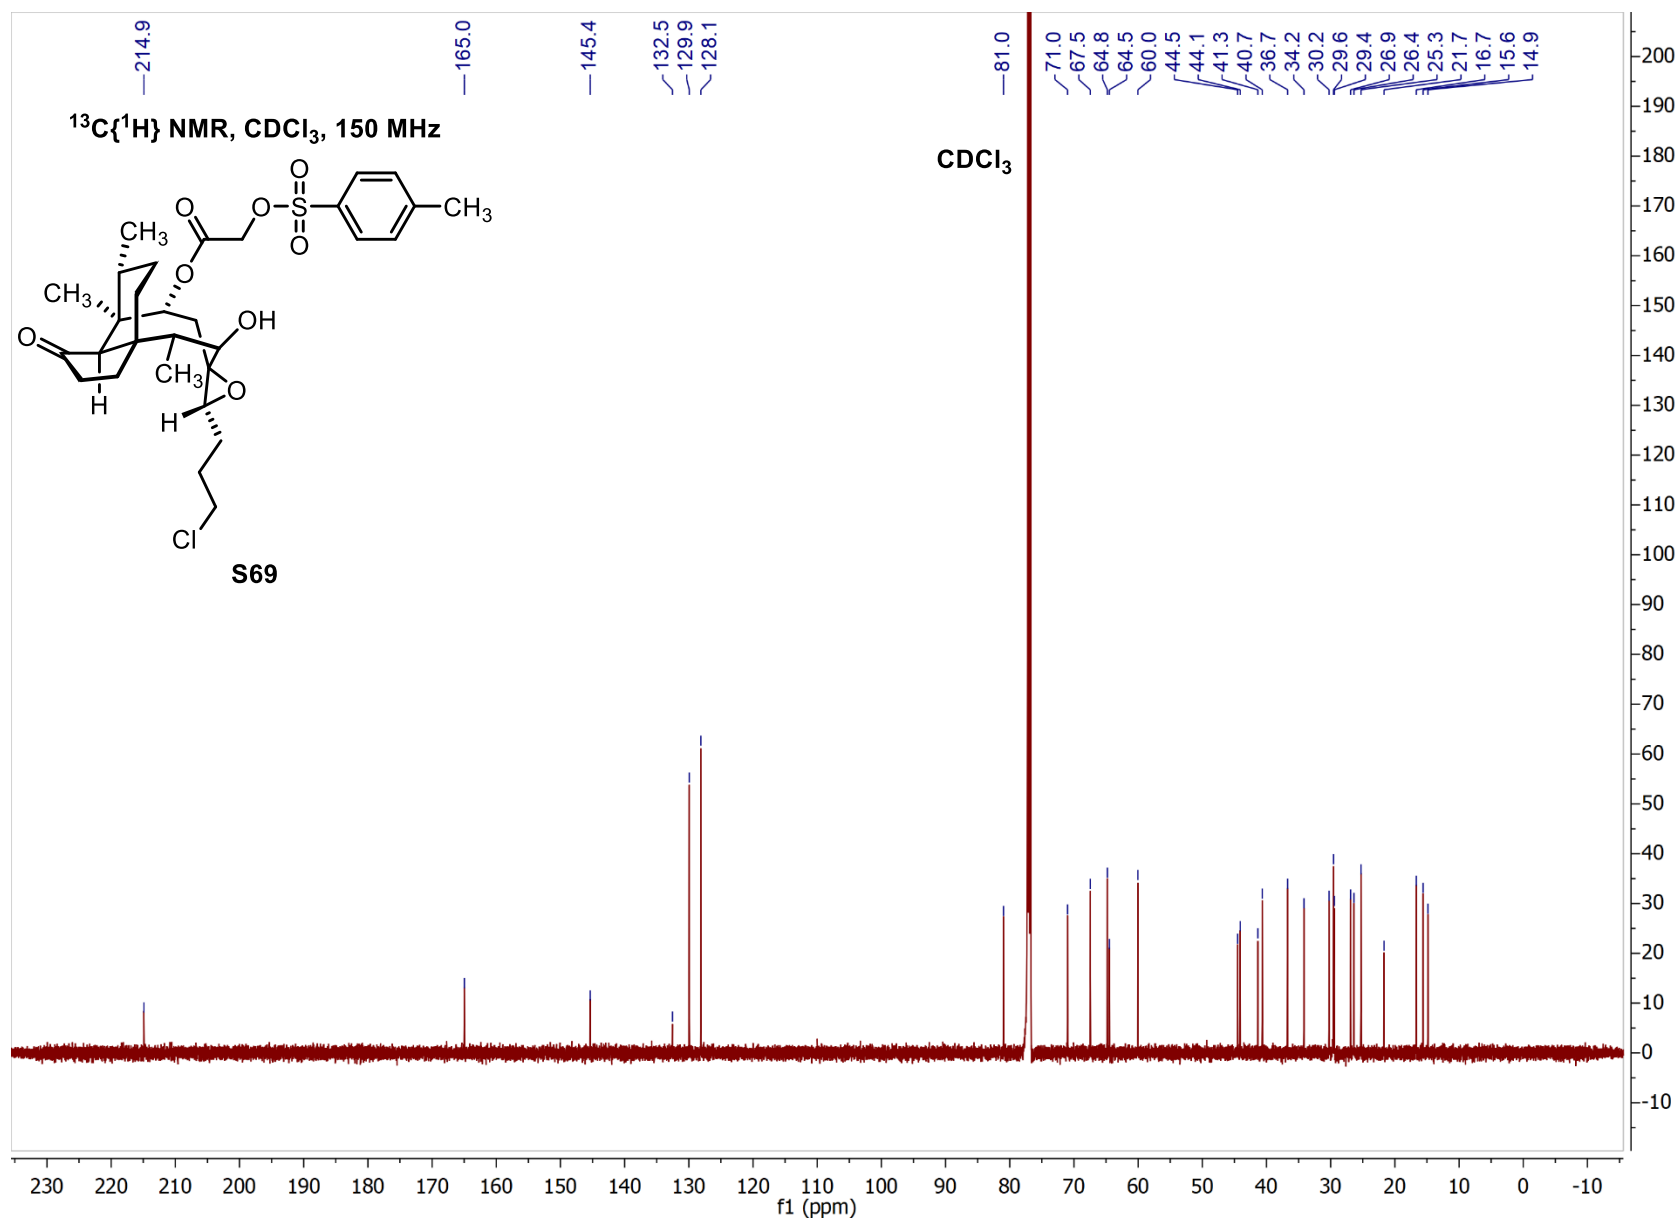

S69, NOESY, CDCl<sub>3</sub>, 500 MHz

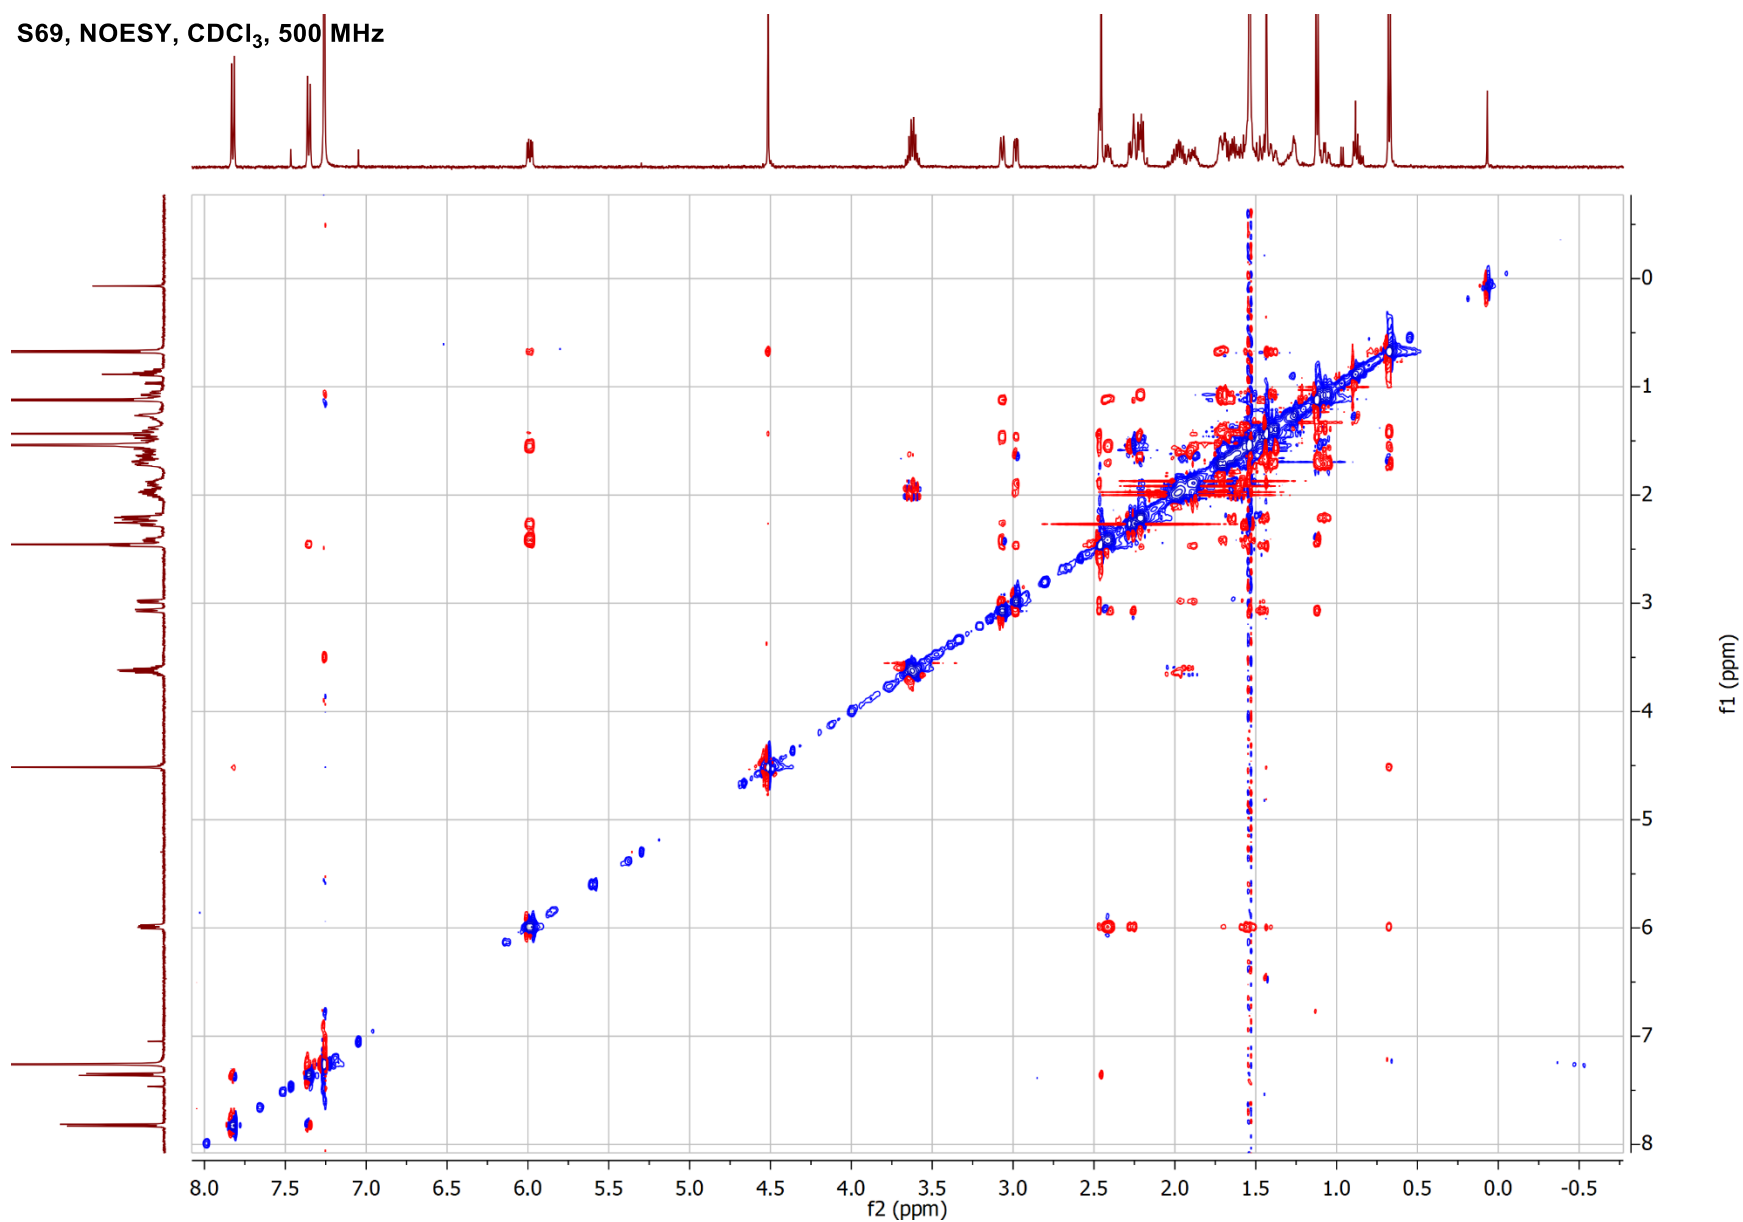

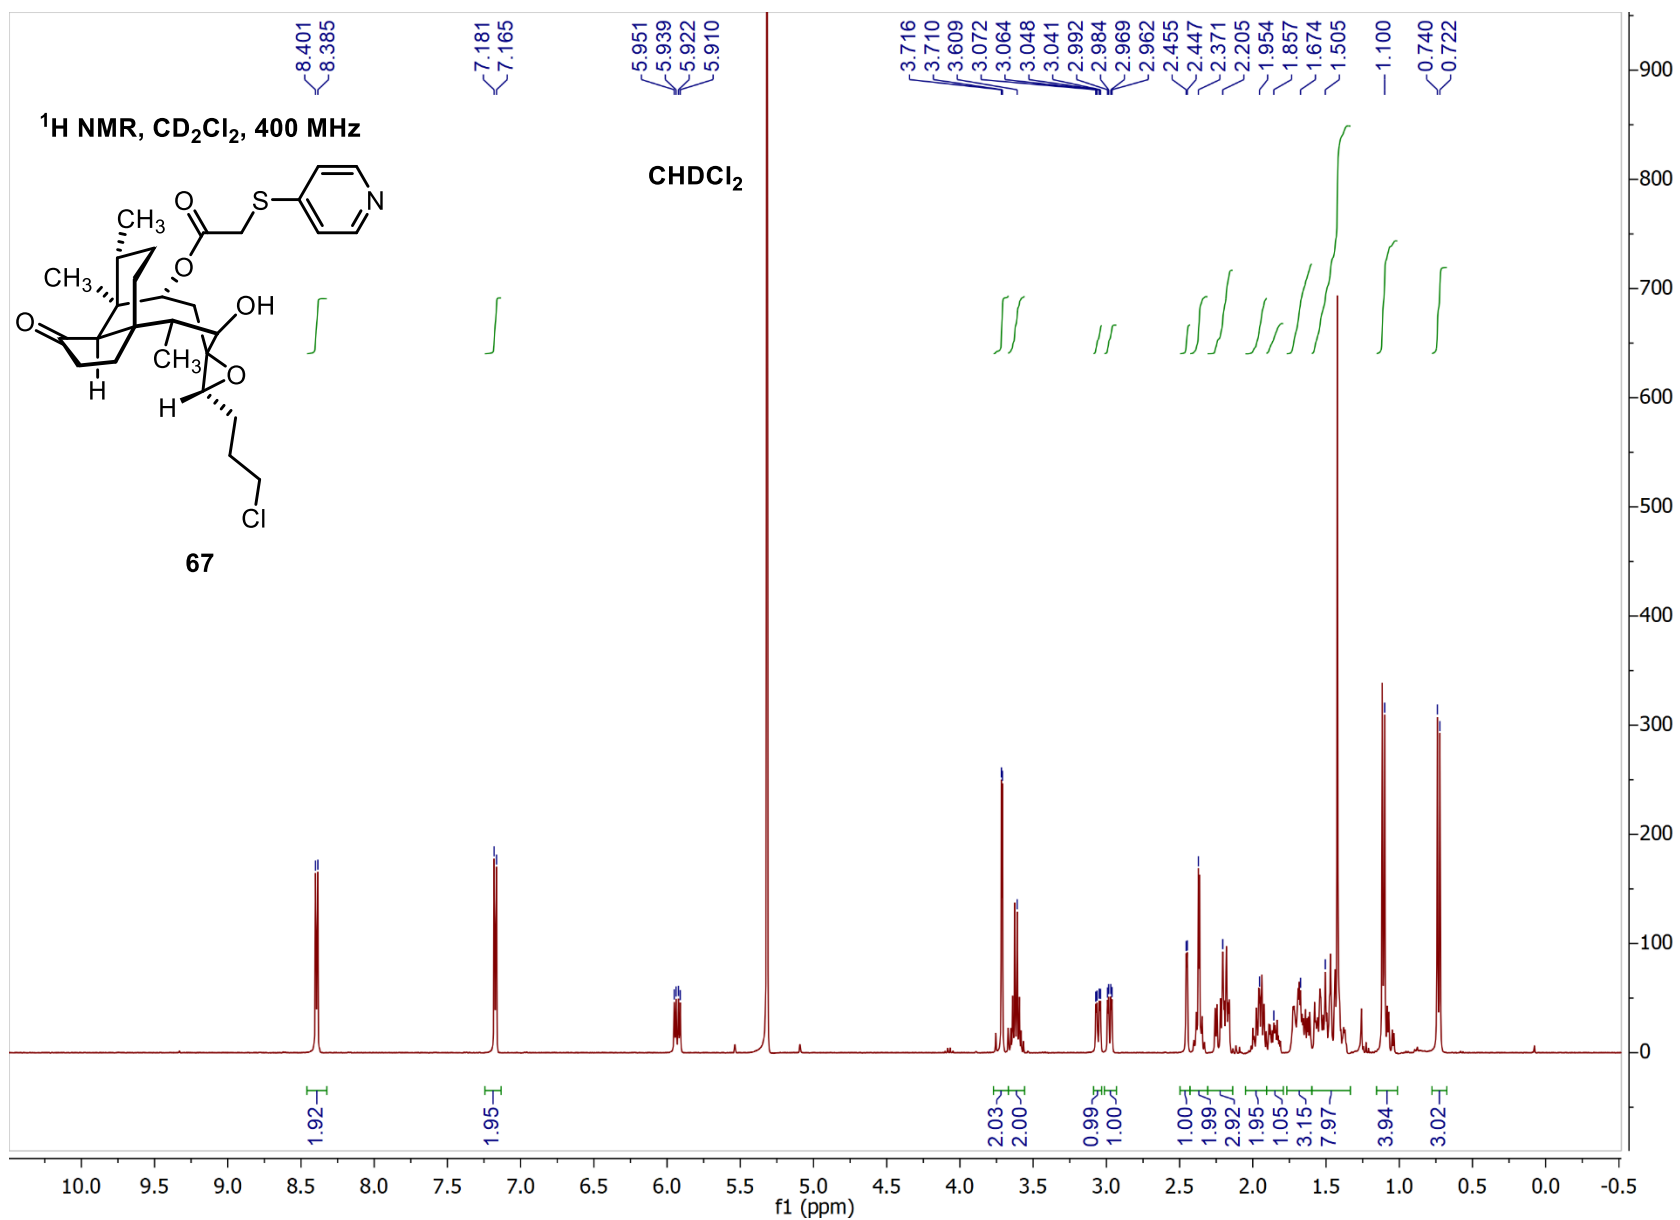

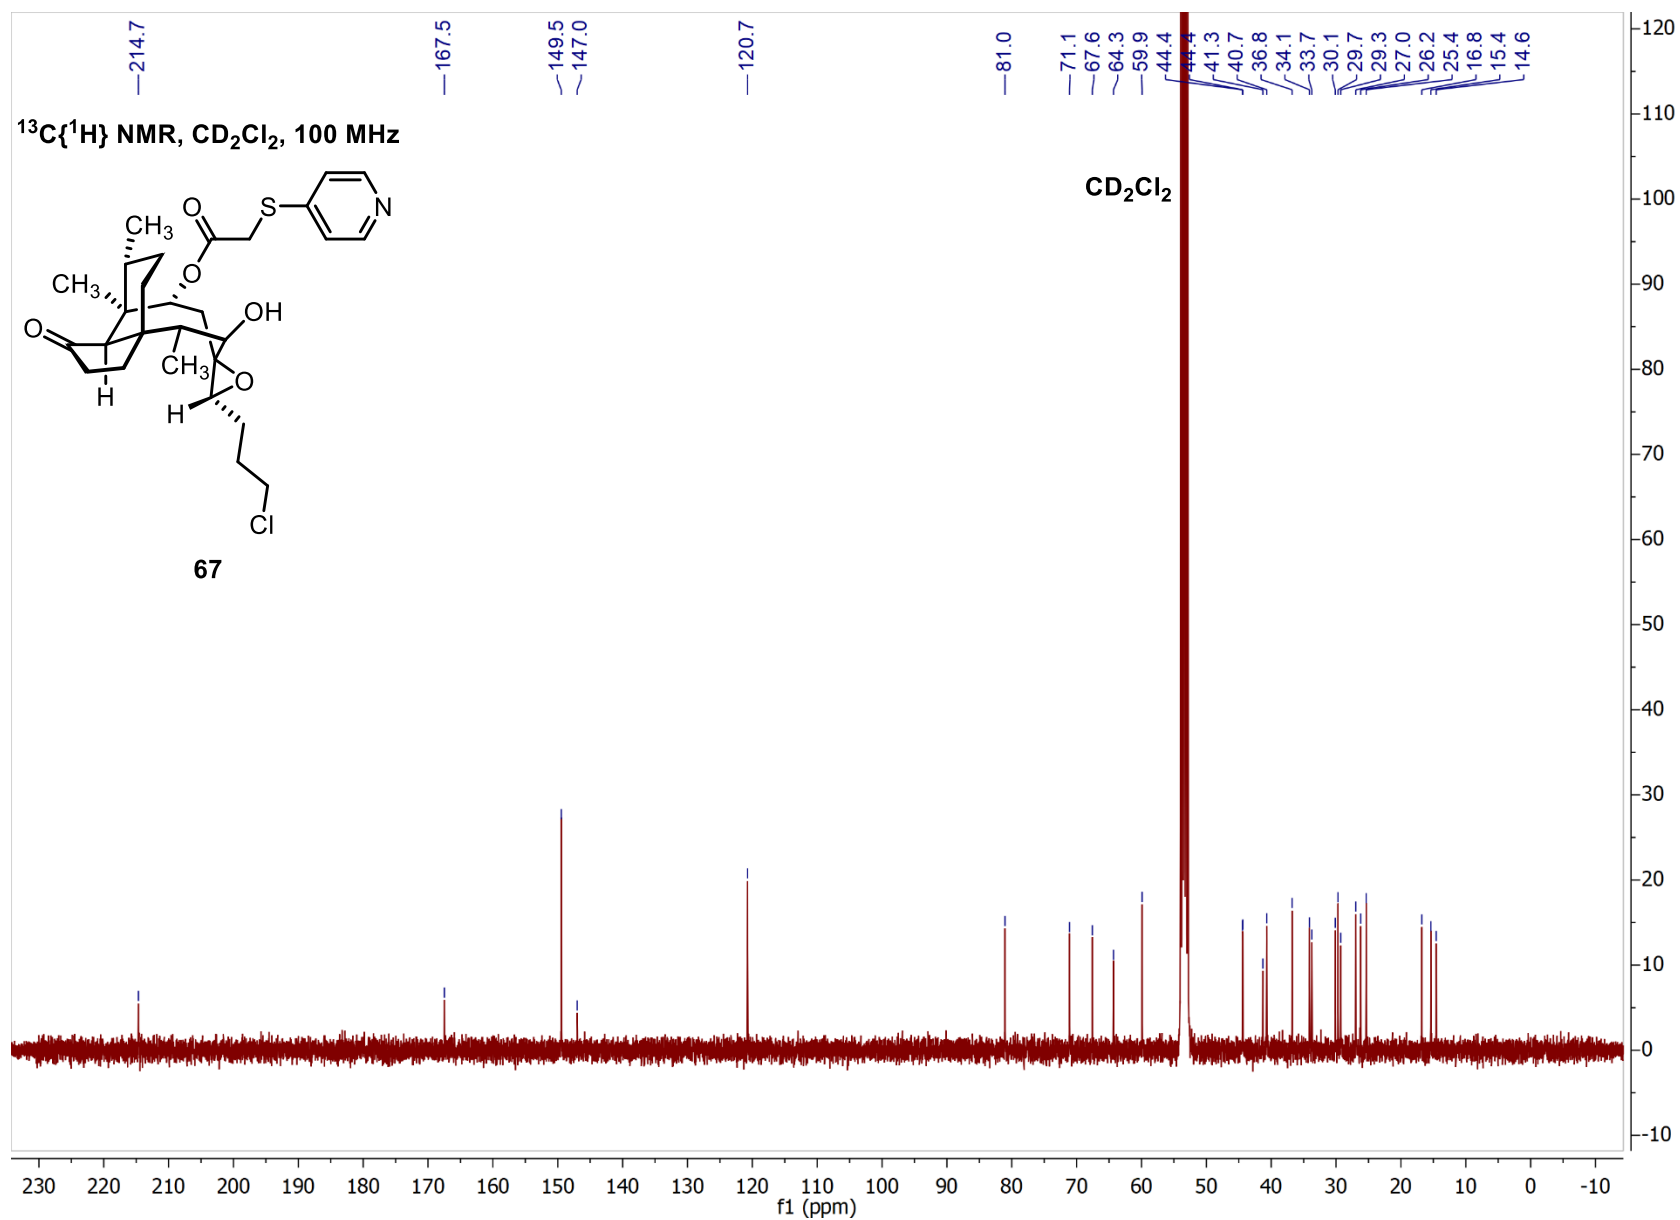

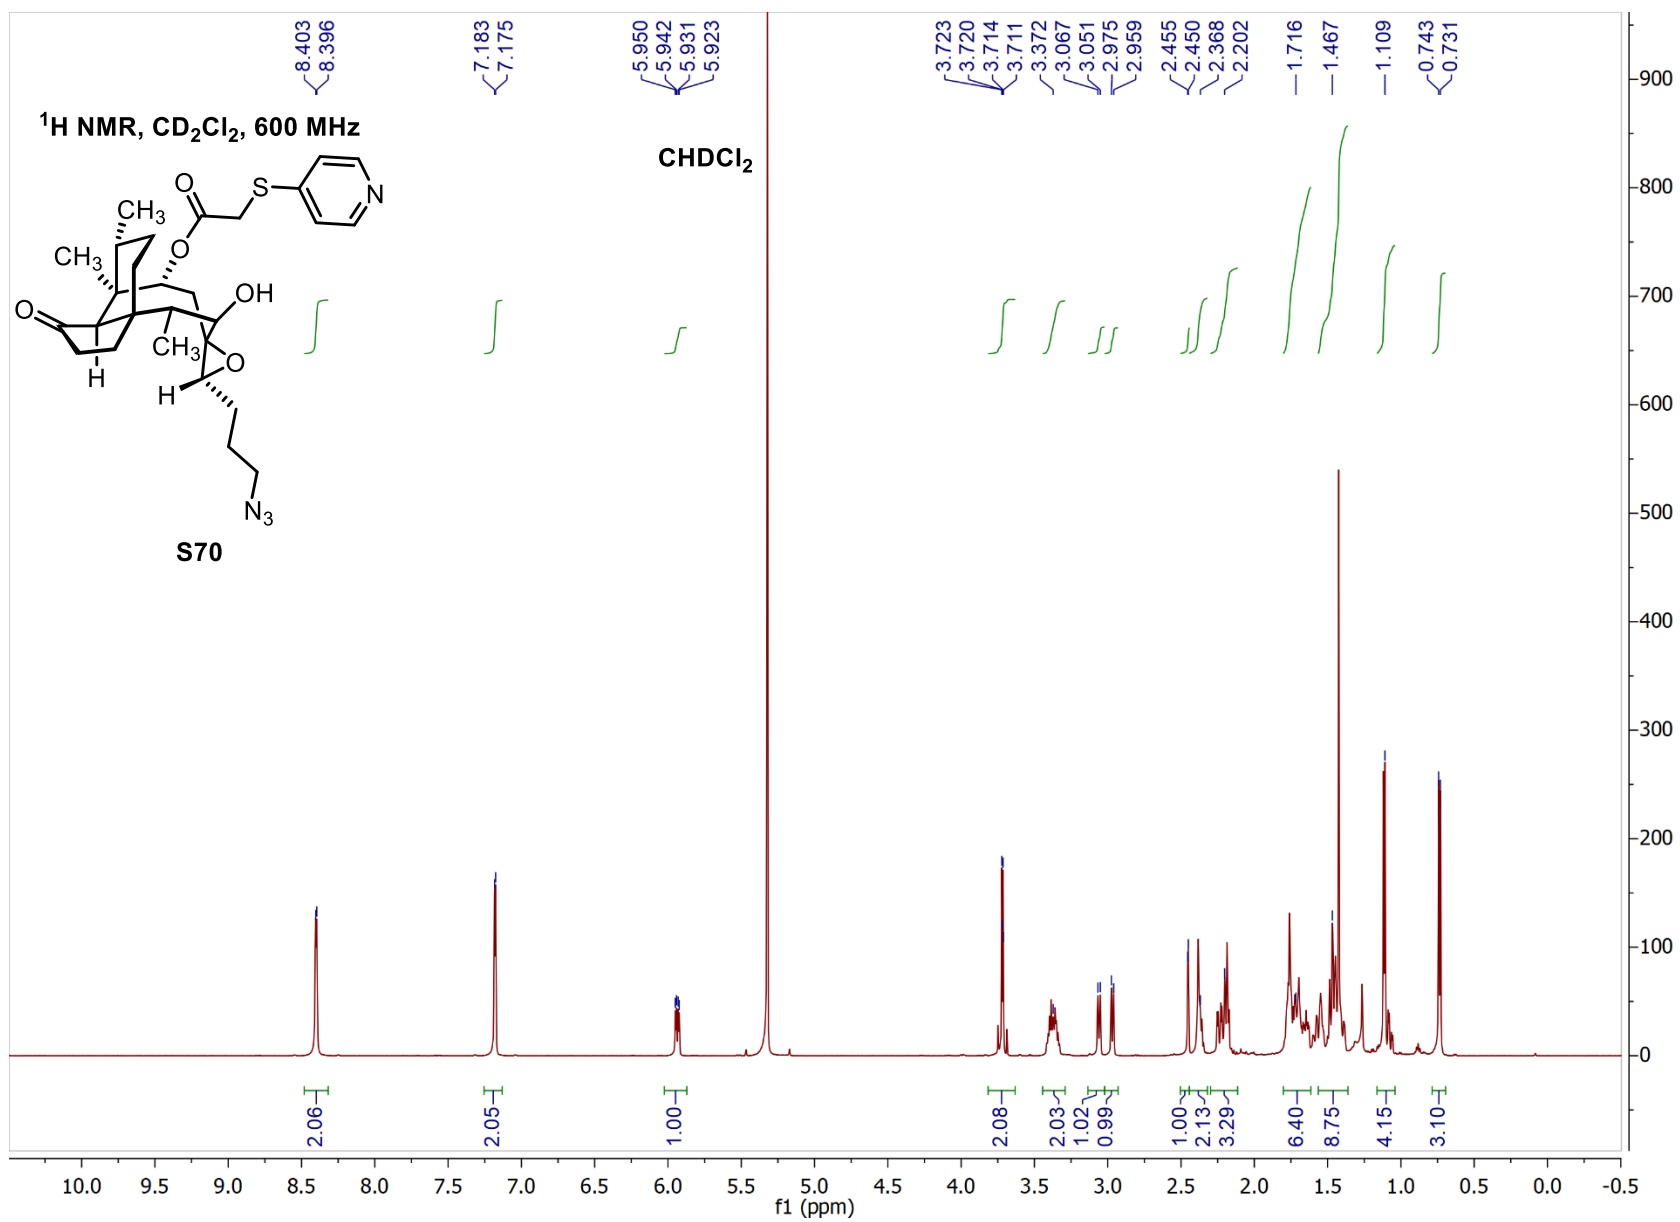



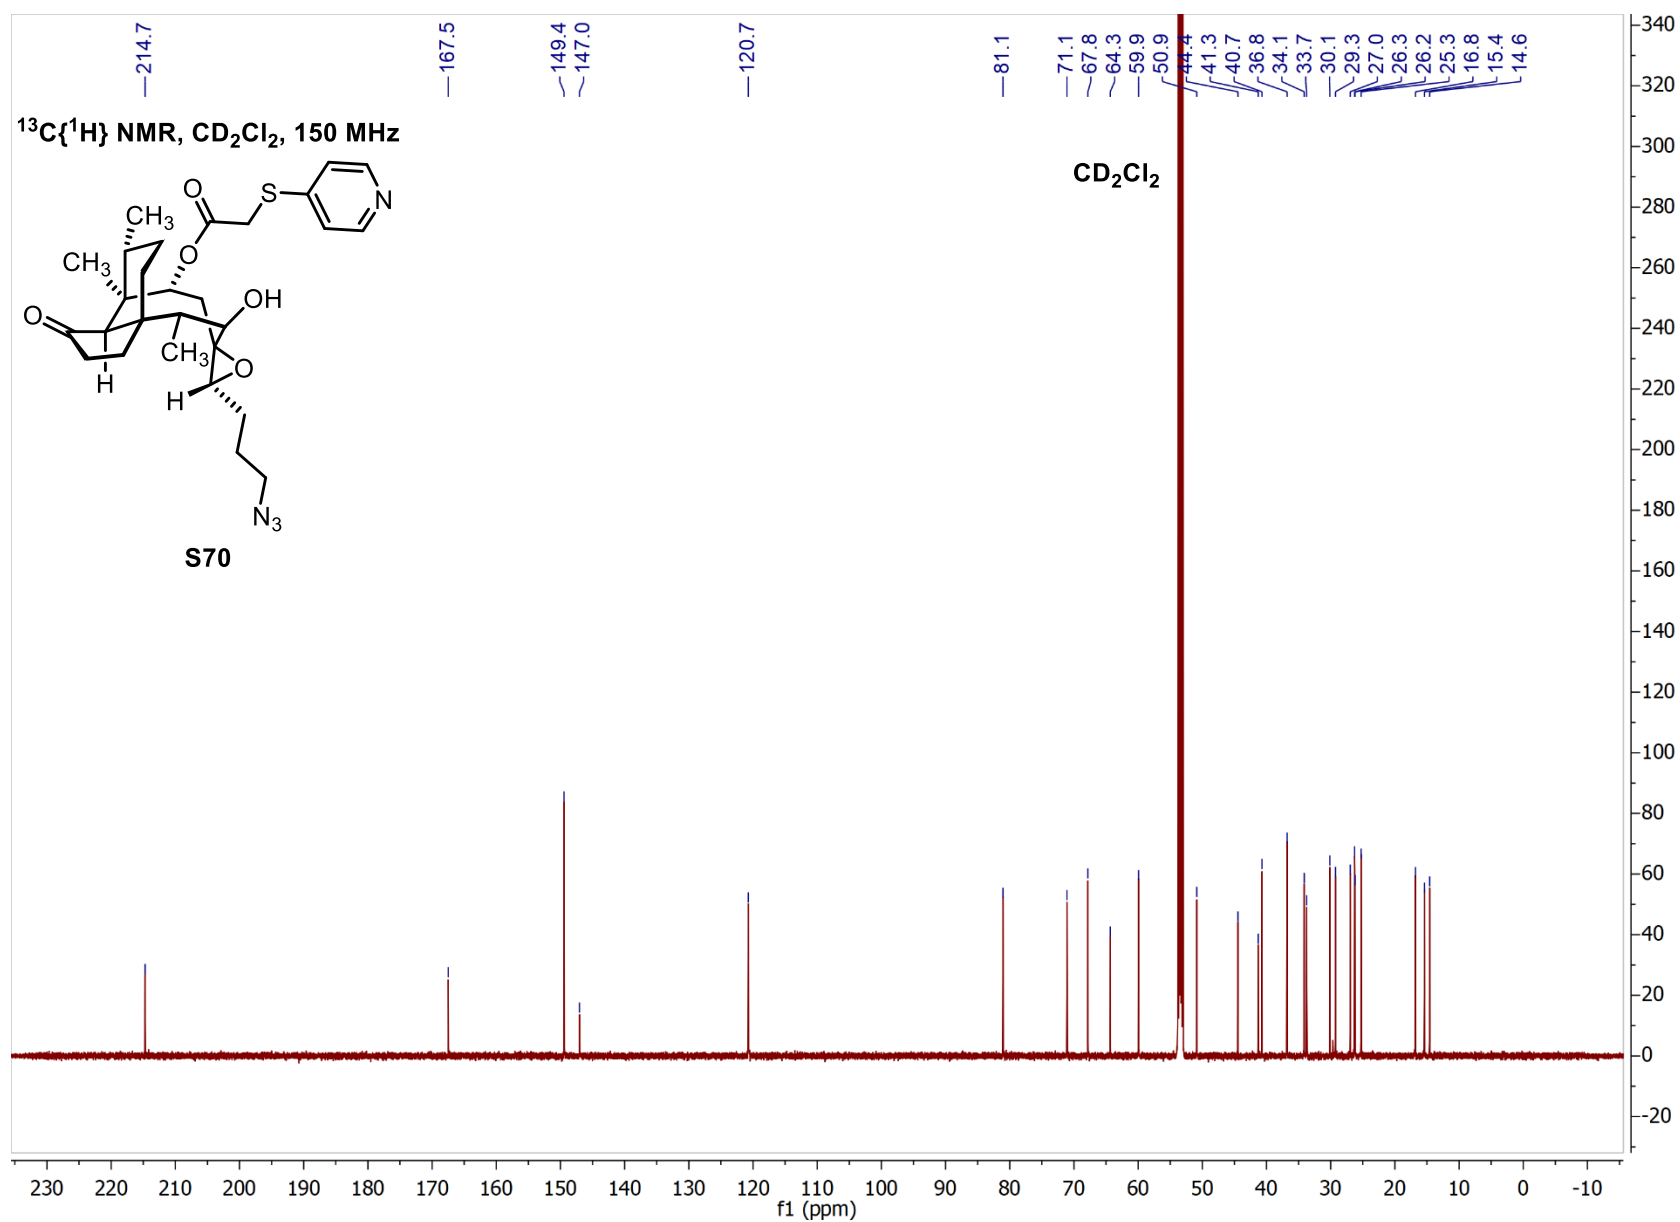

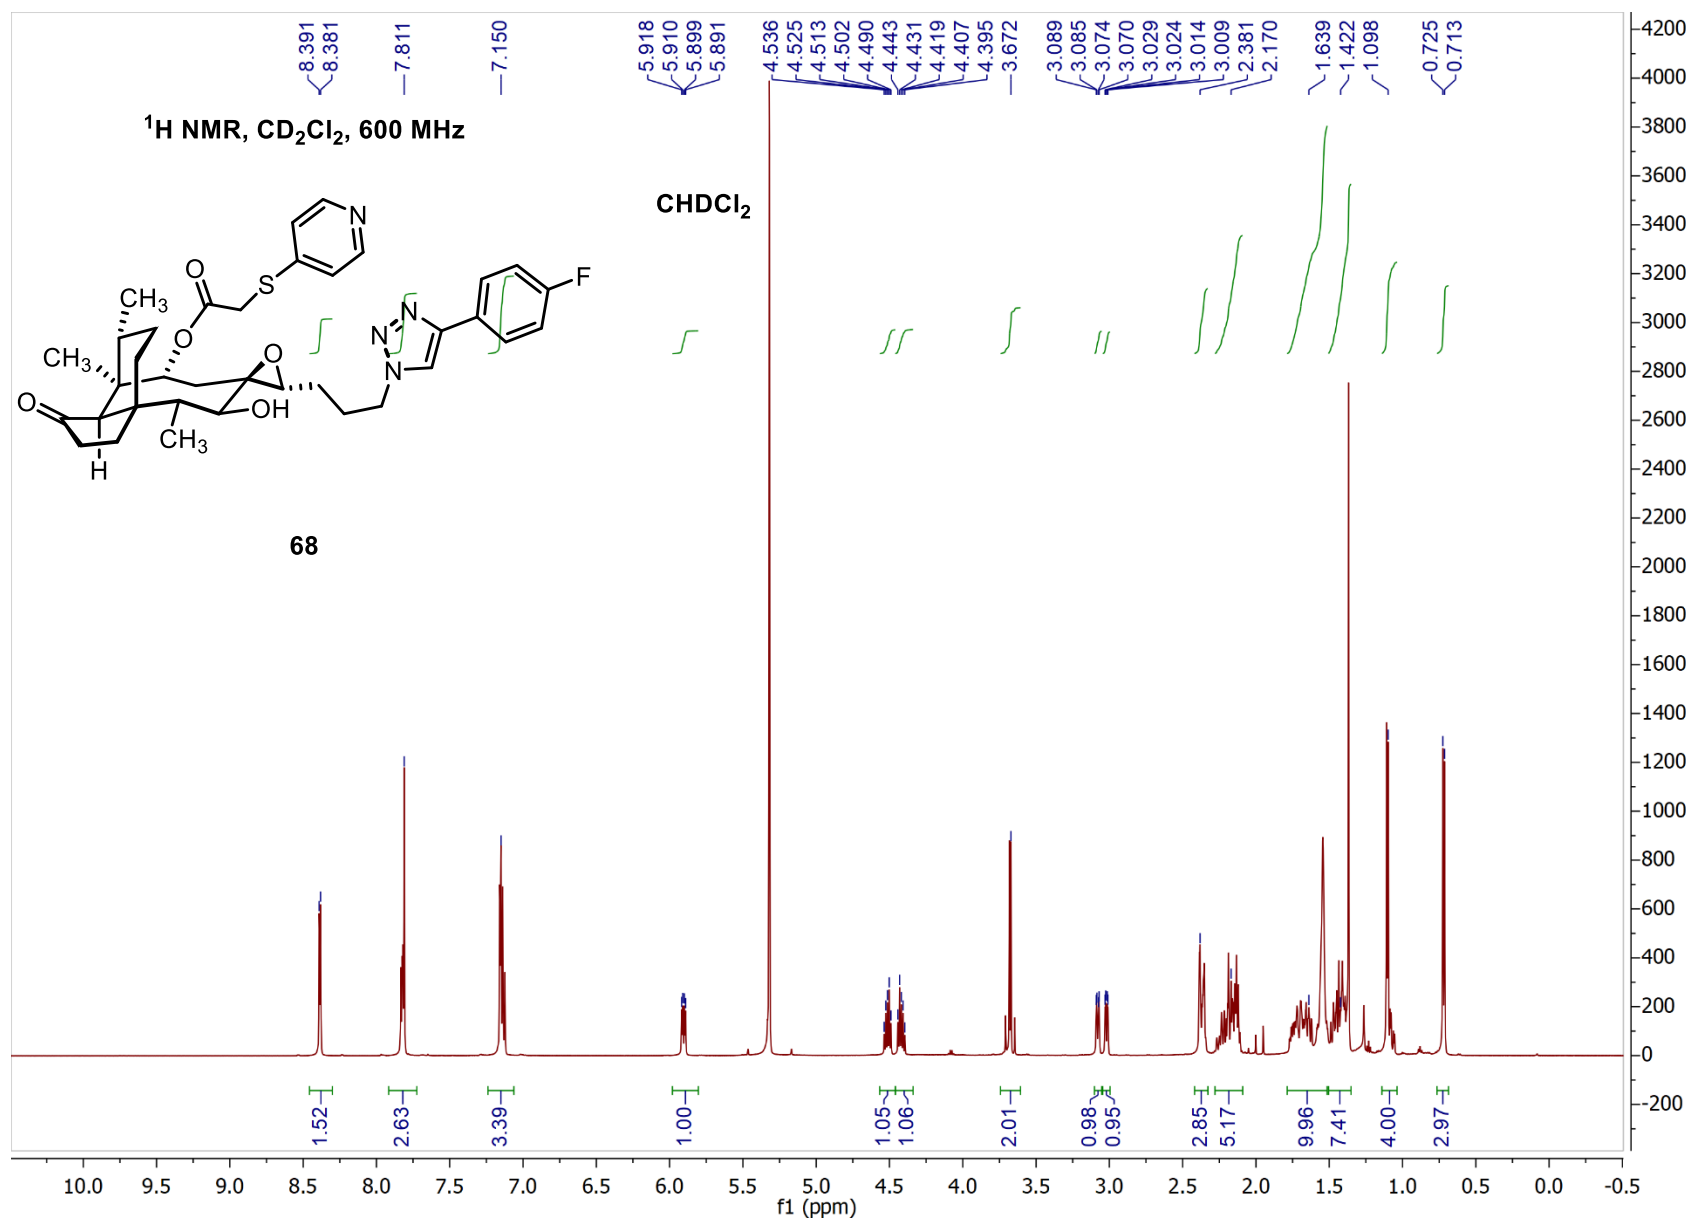

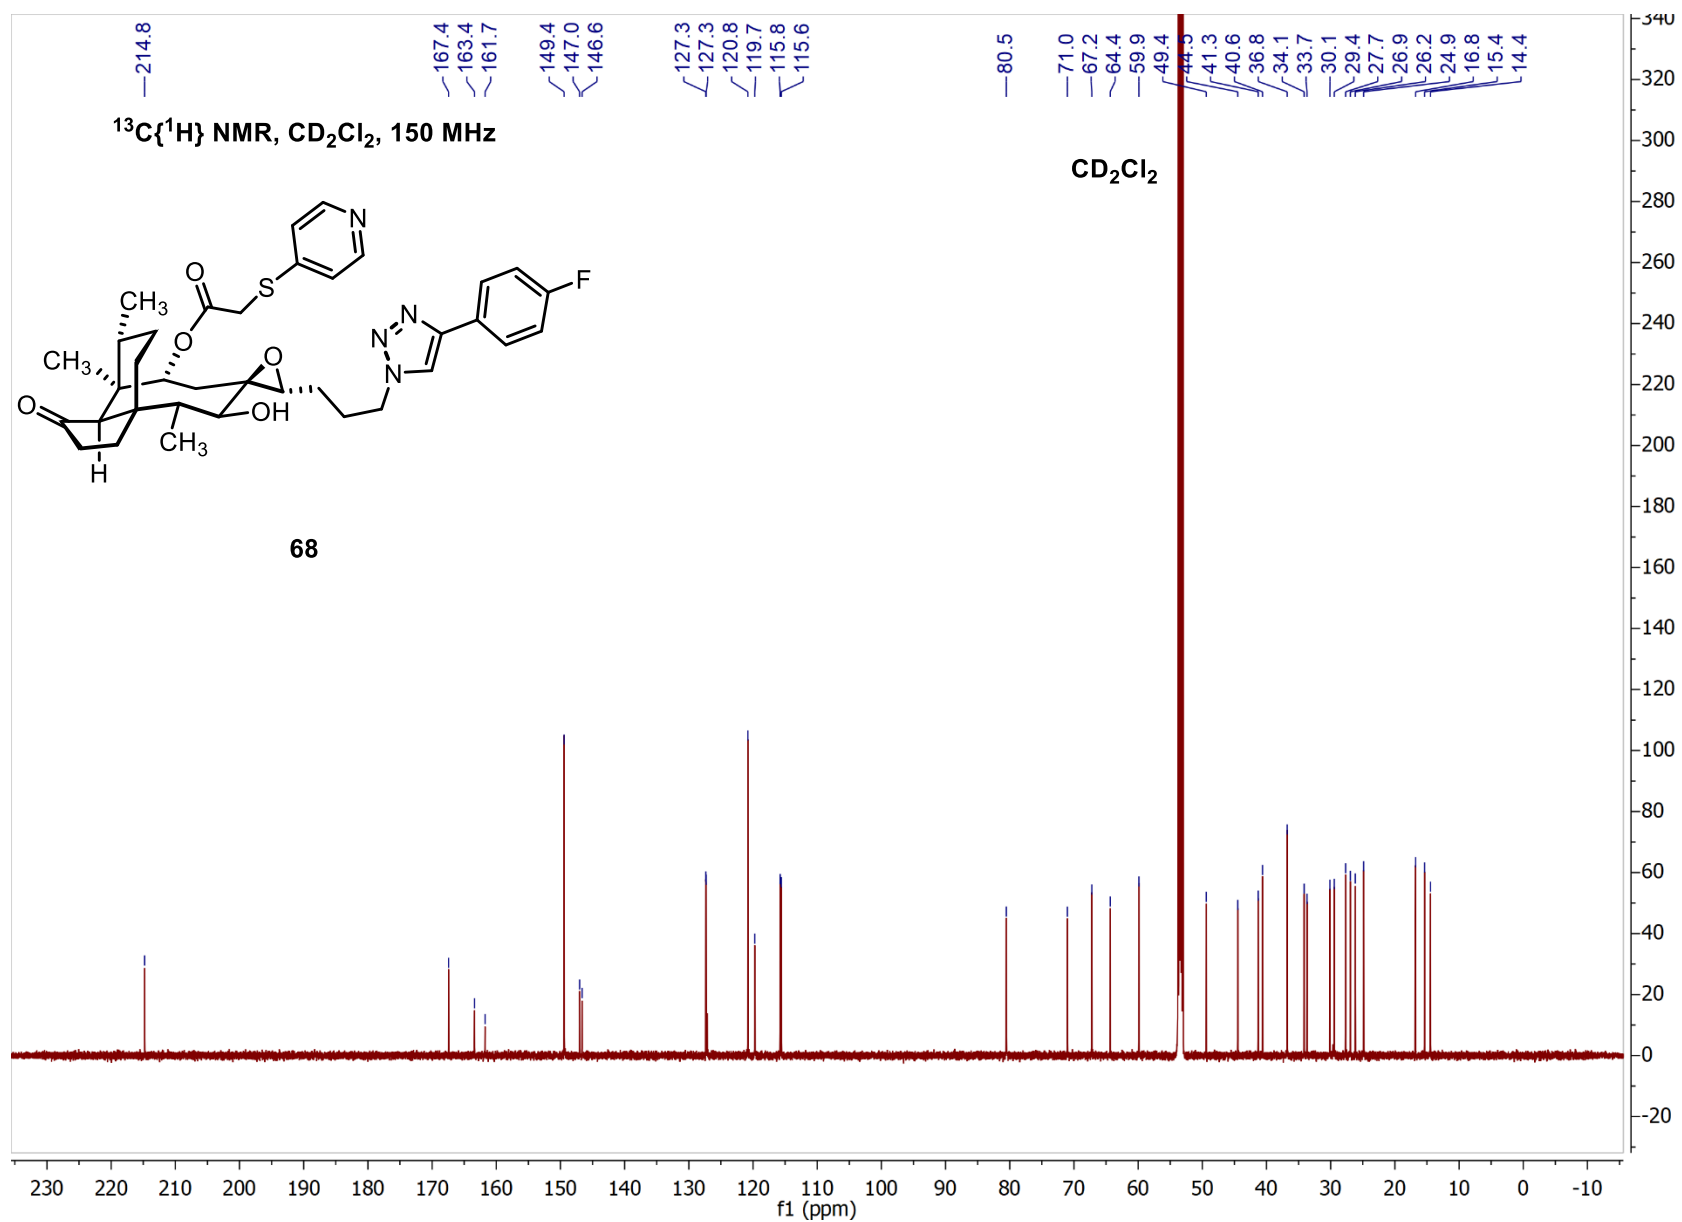

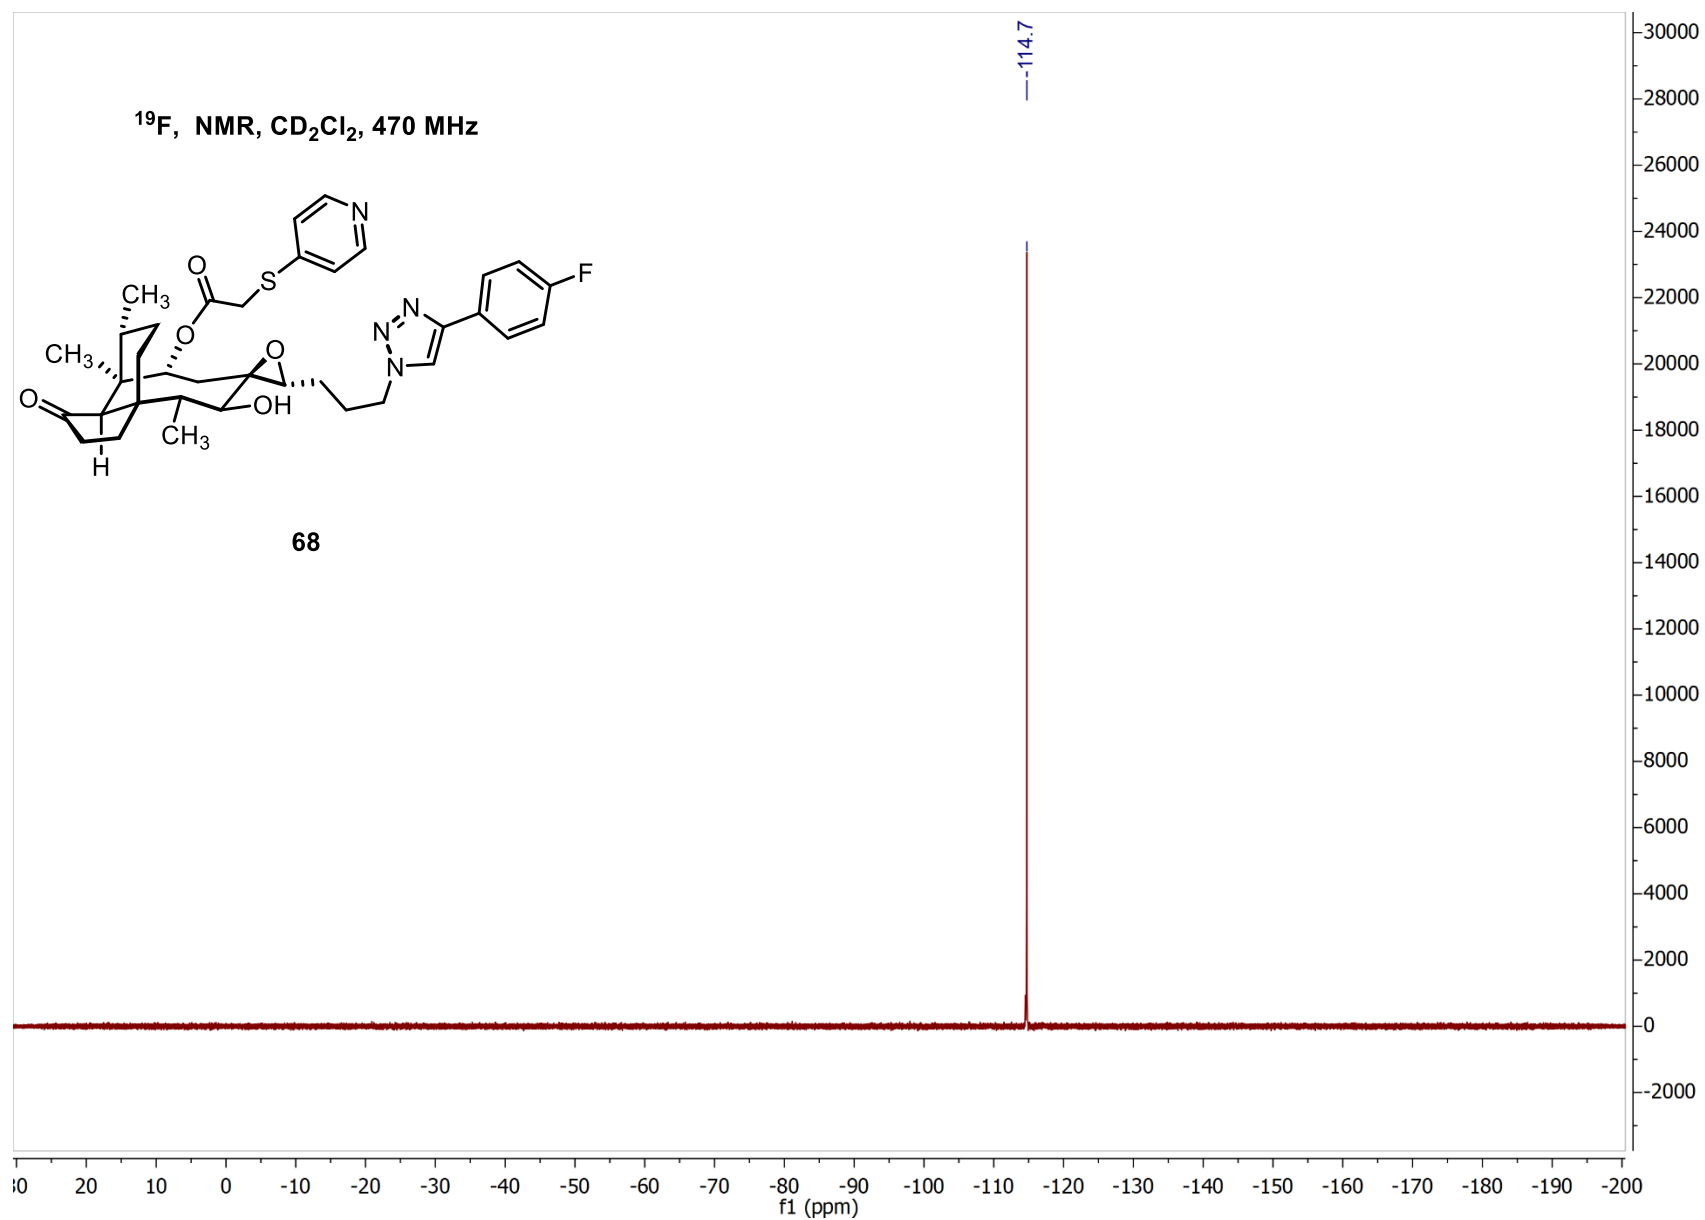

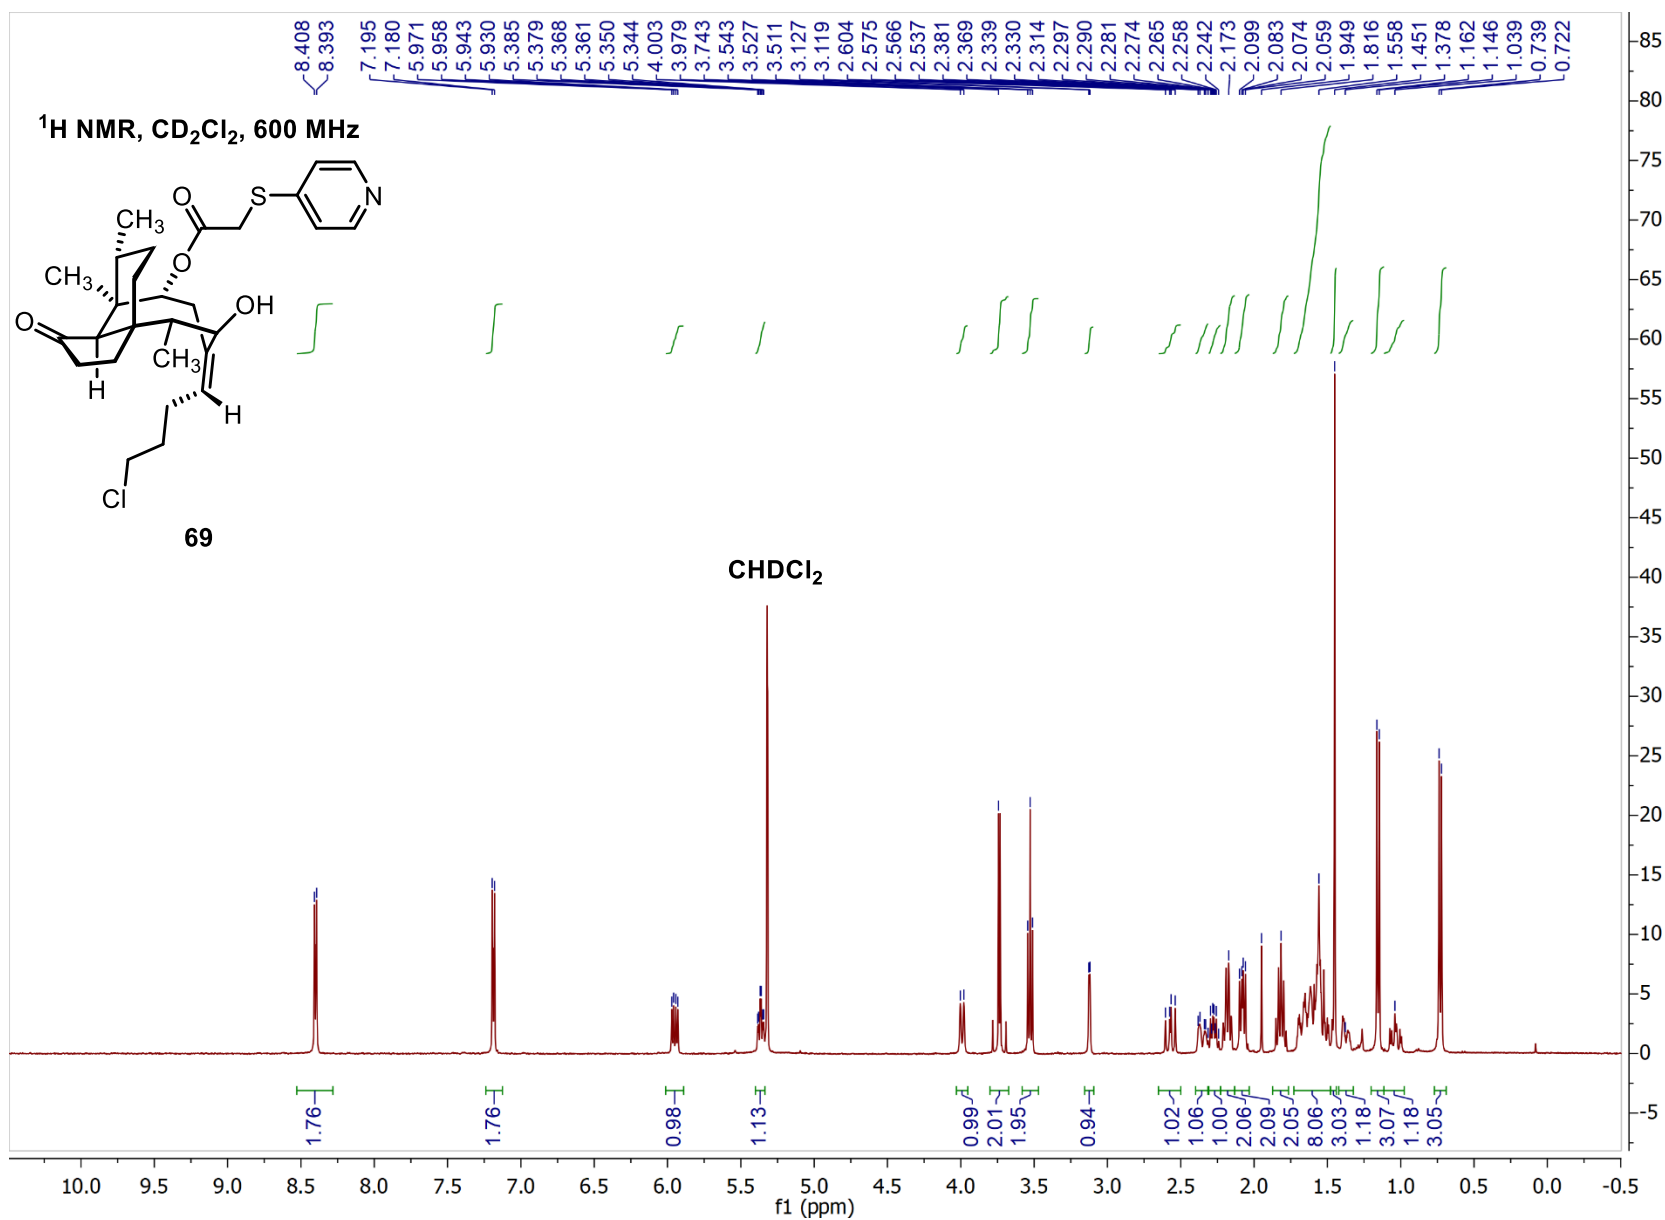

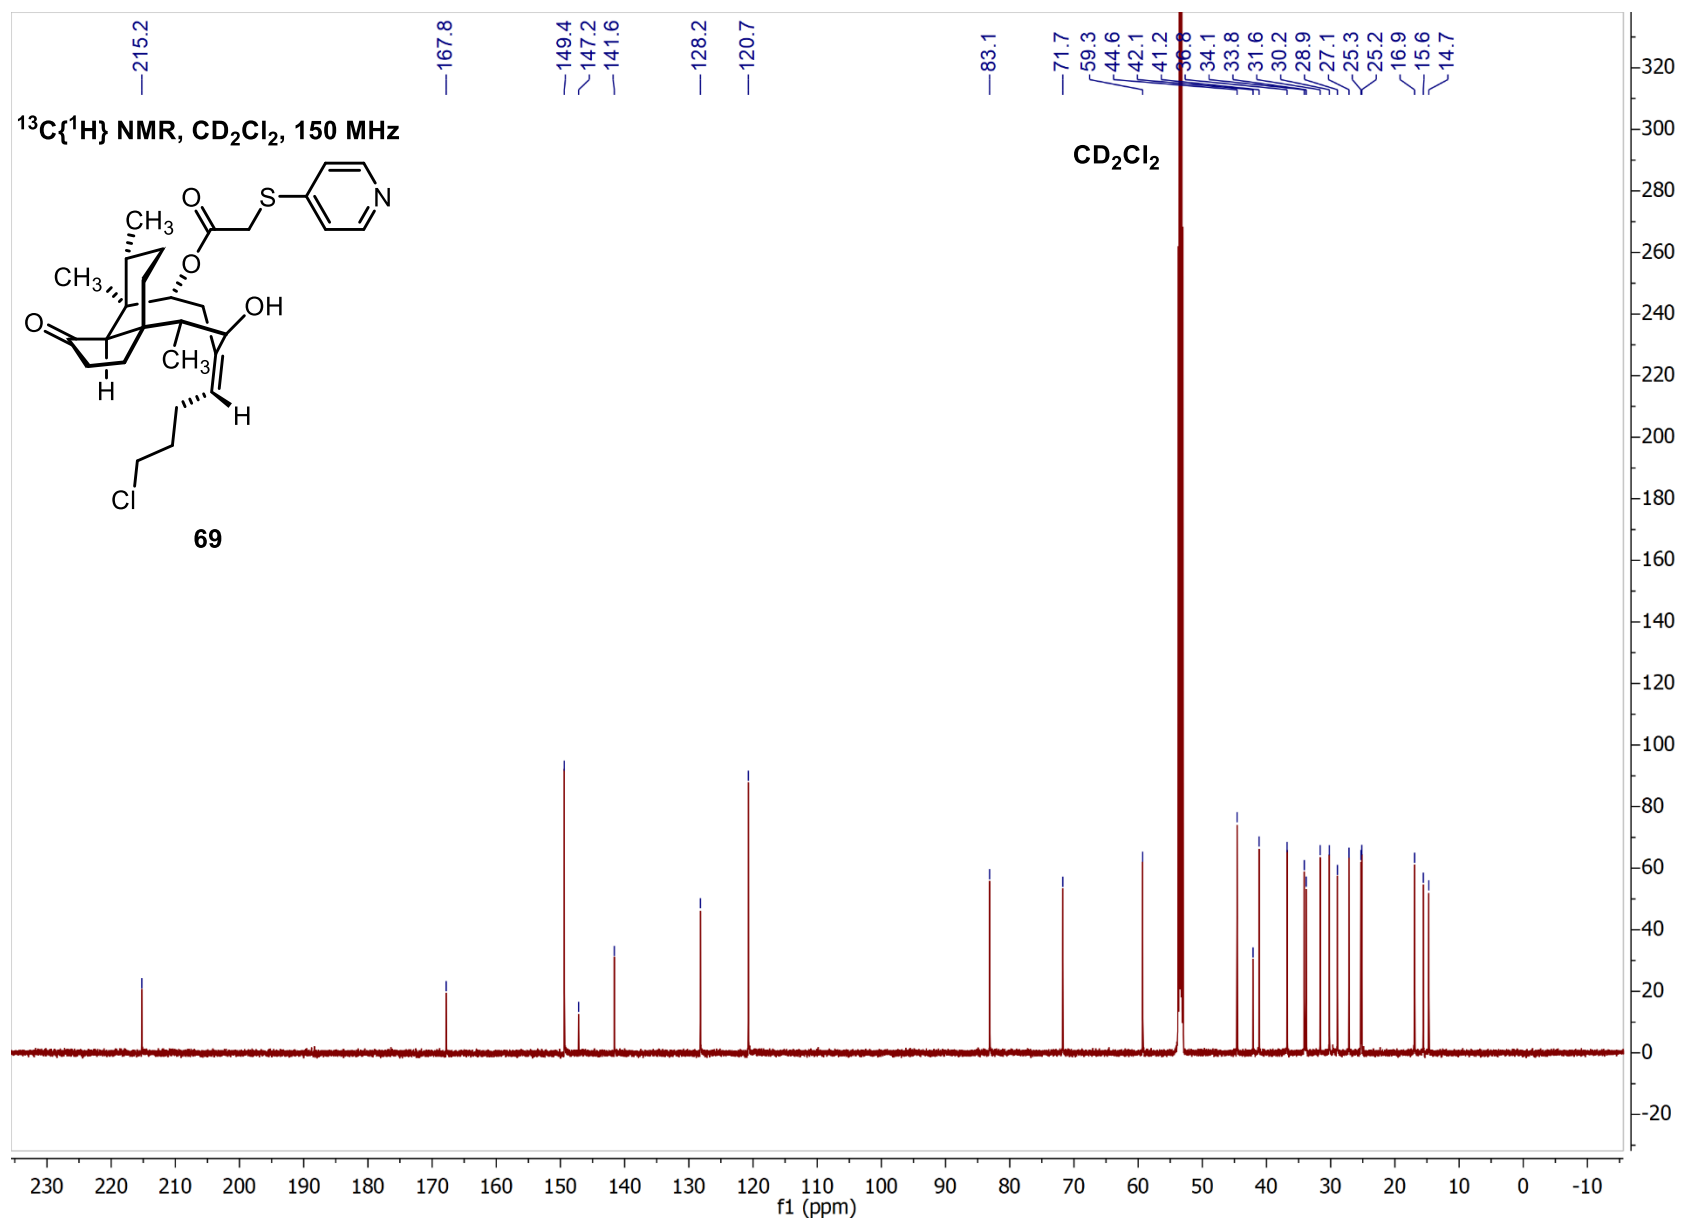

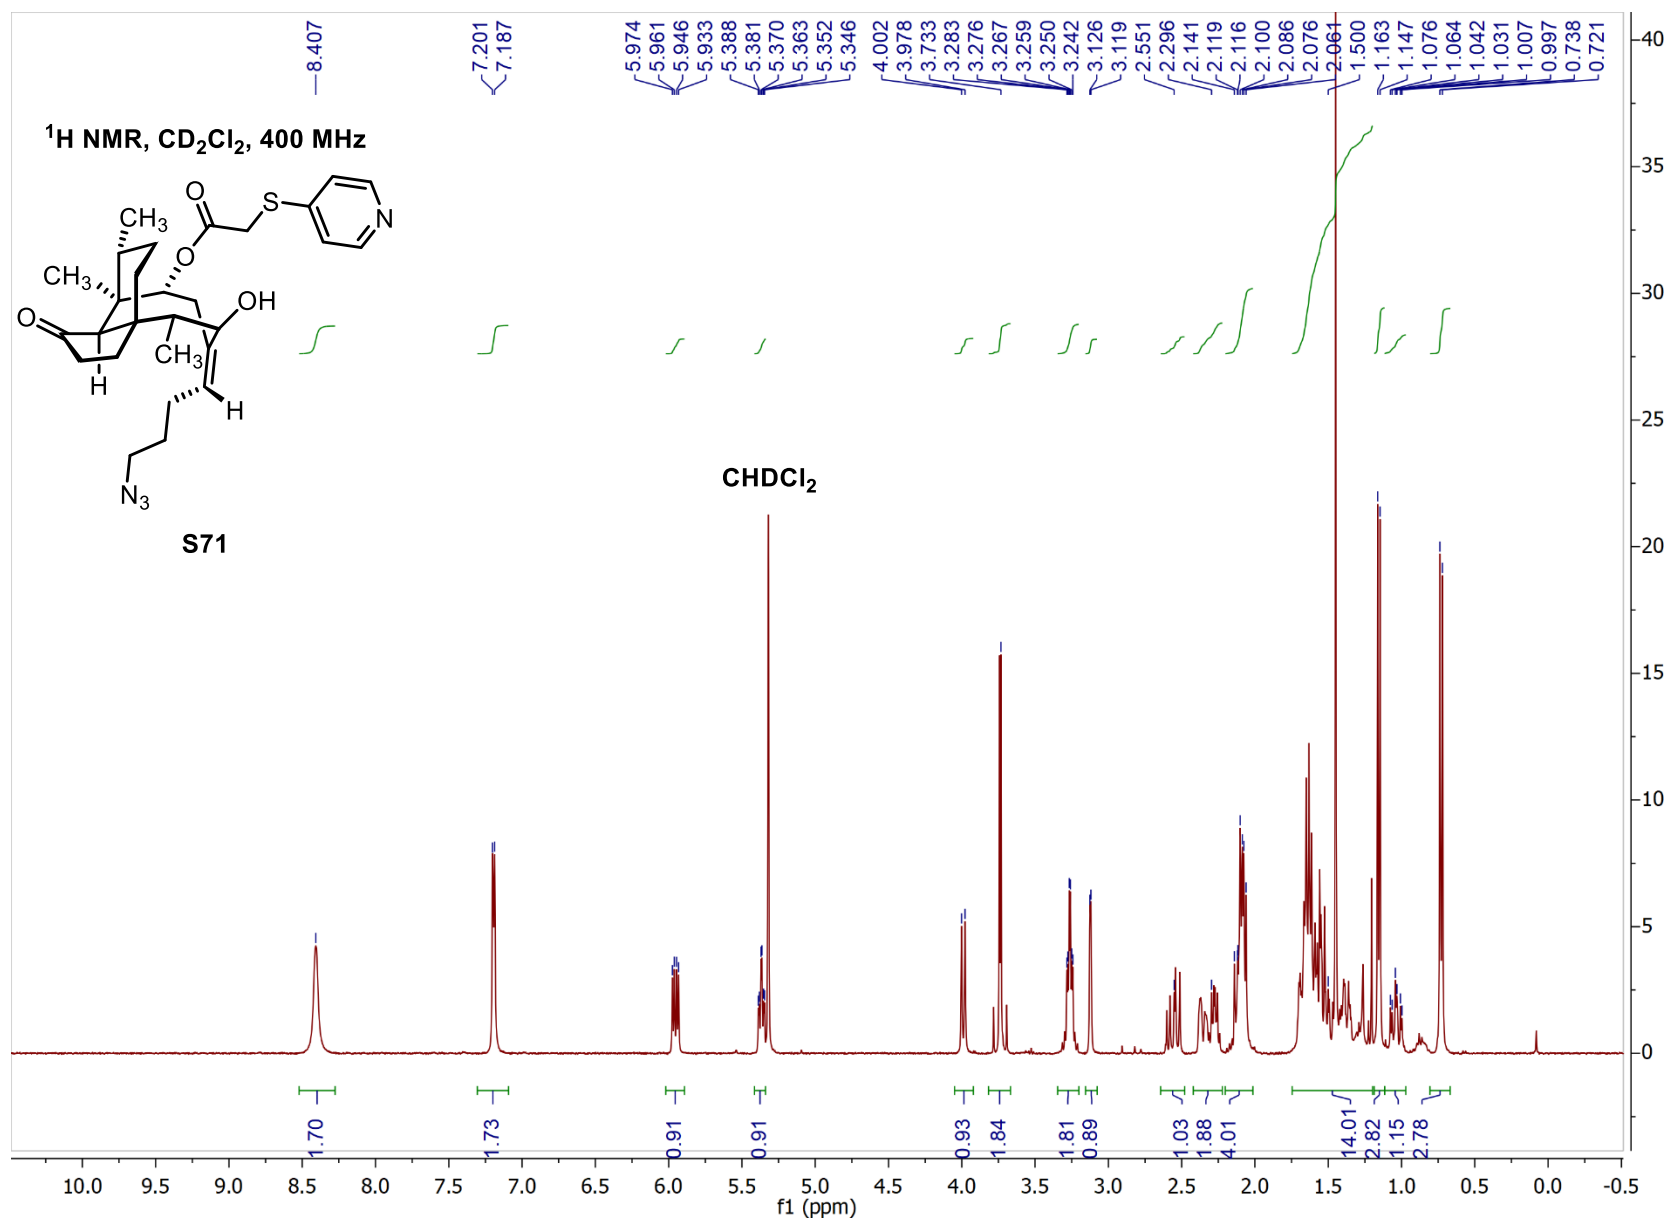

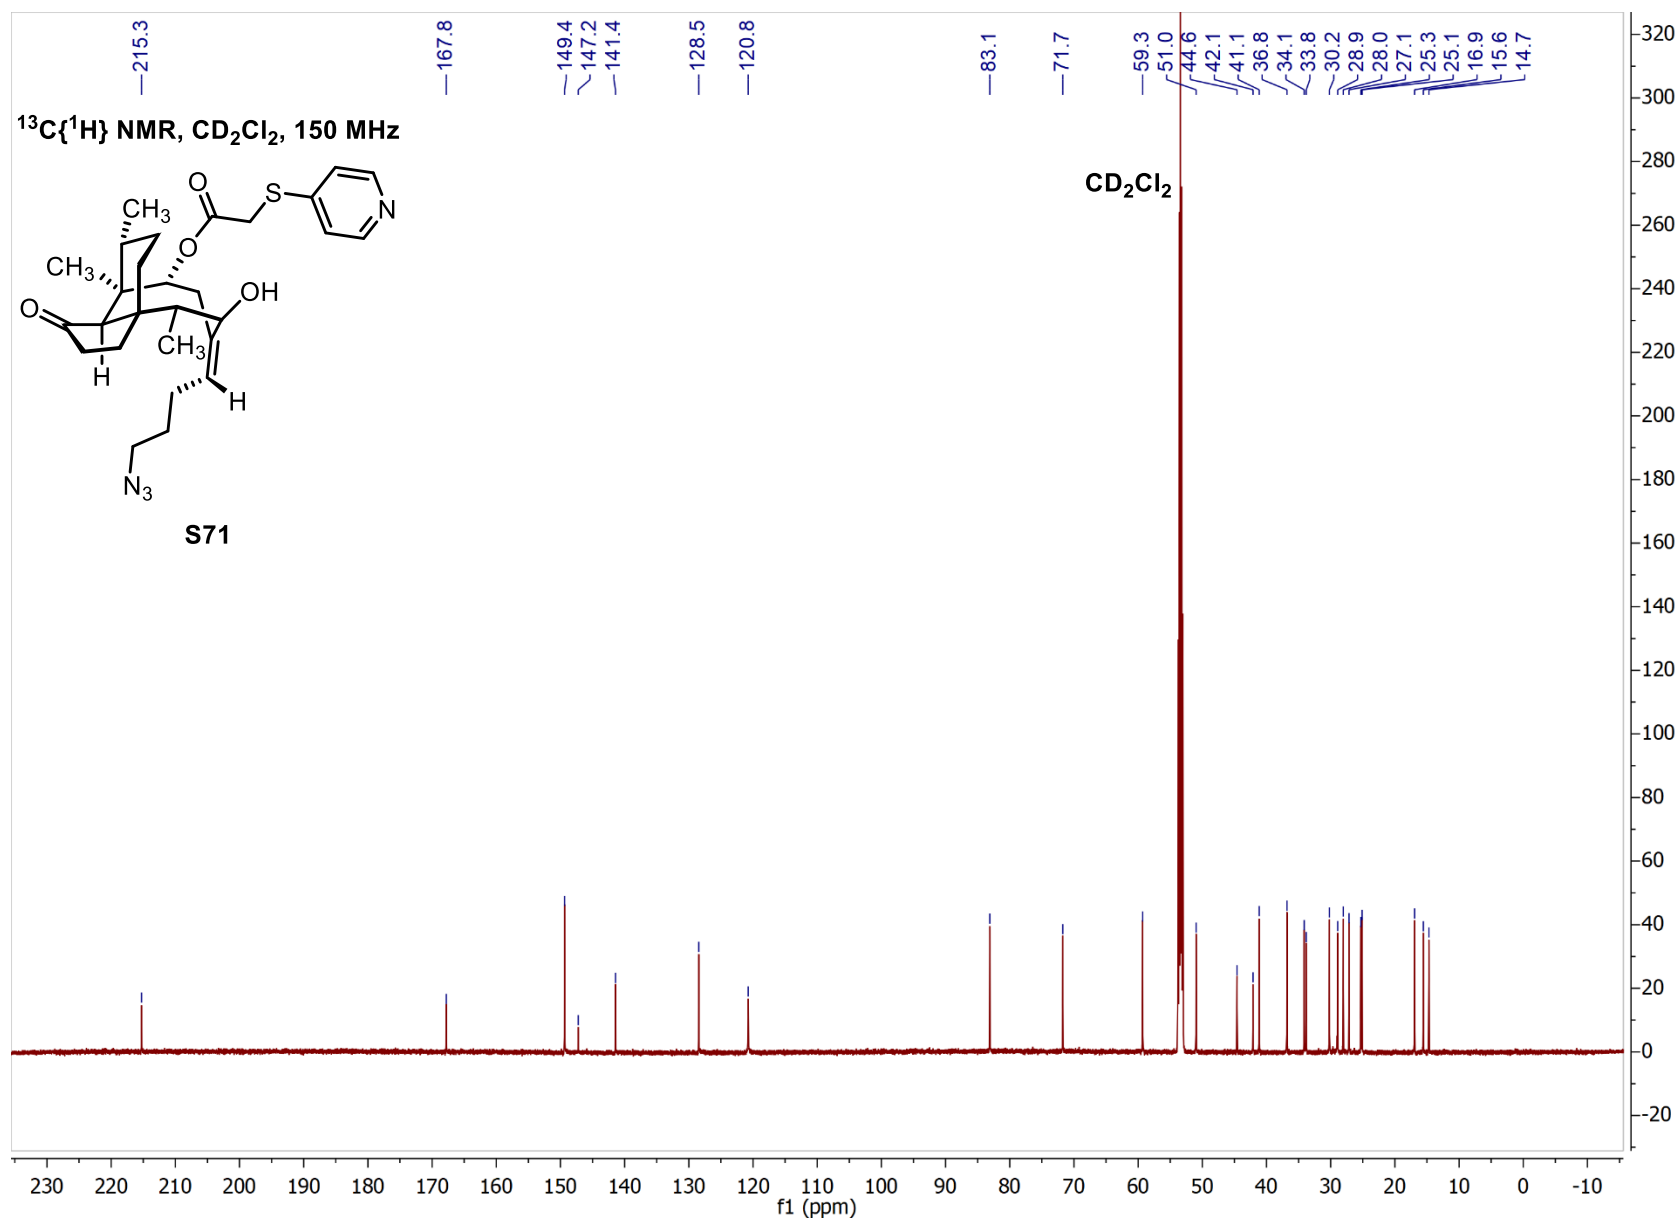



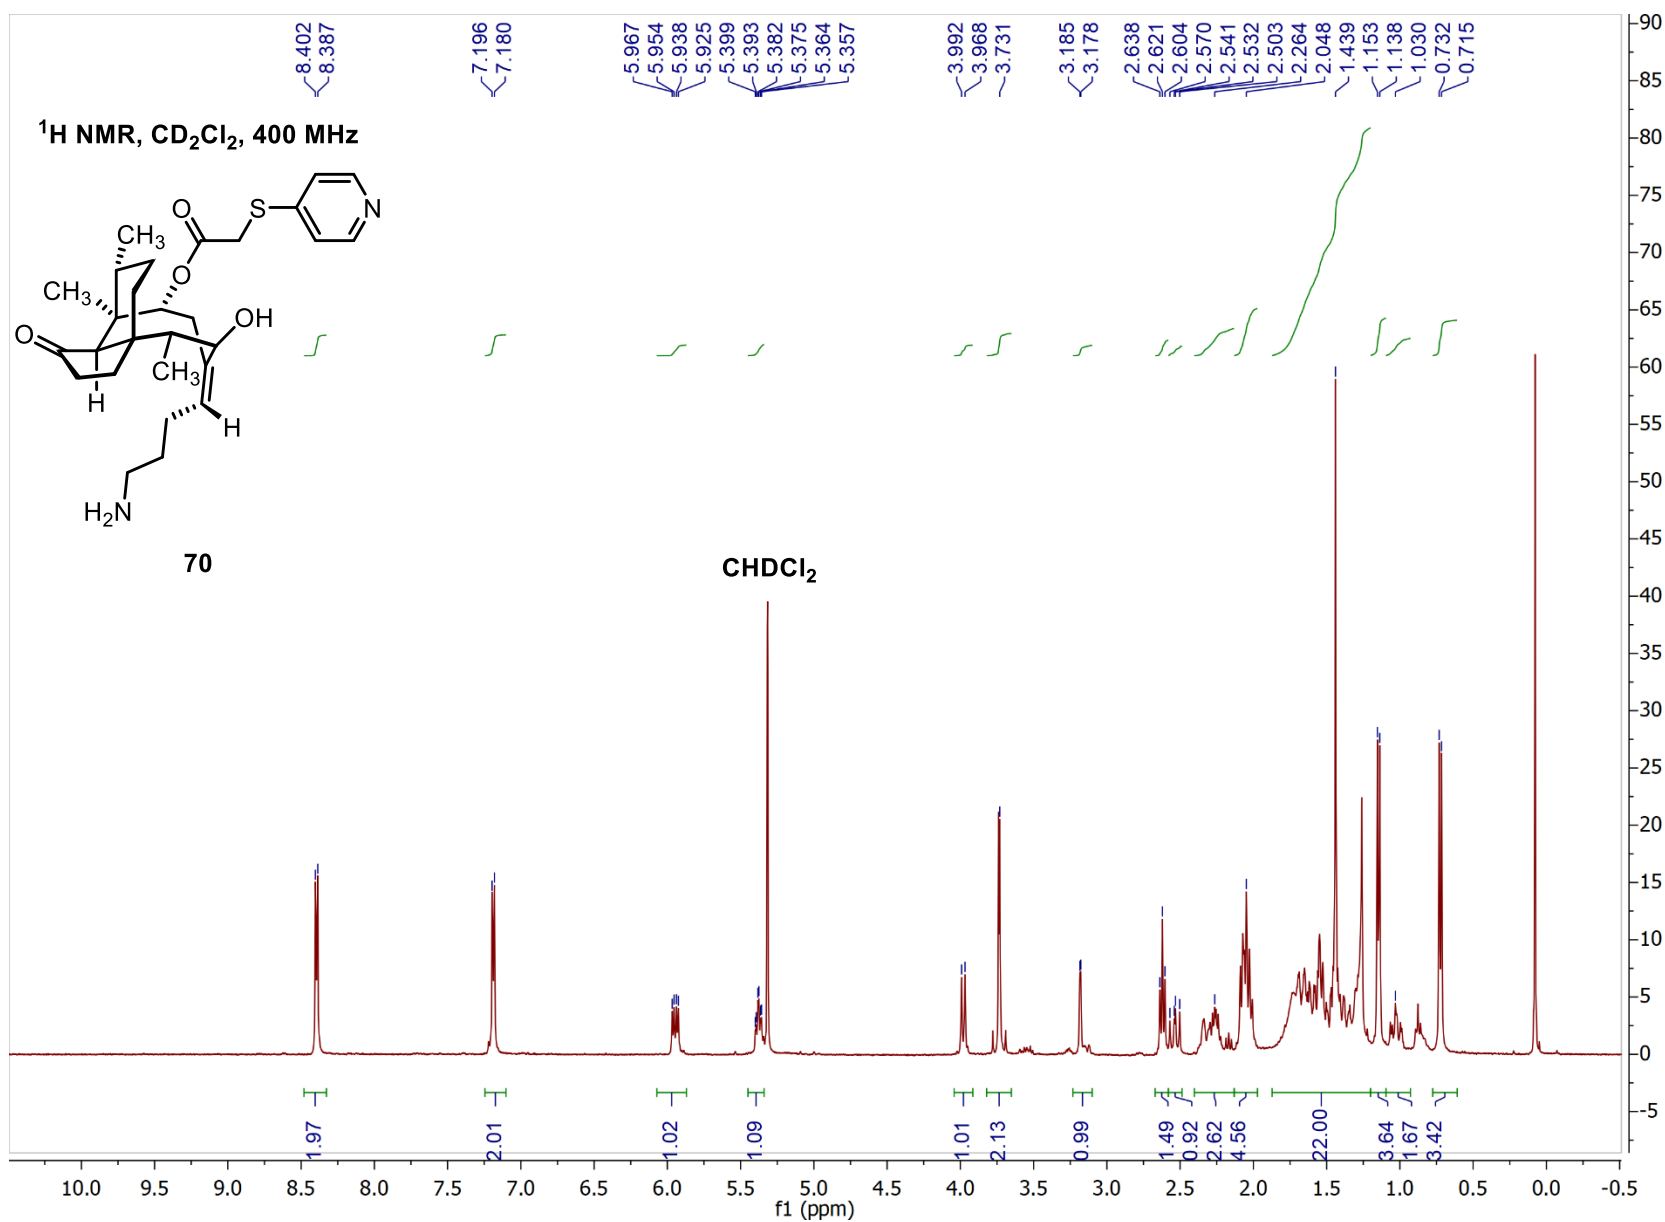

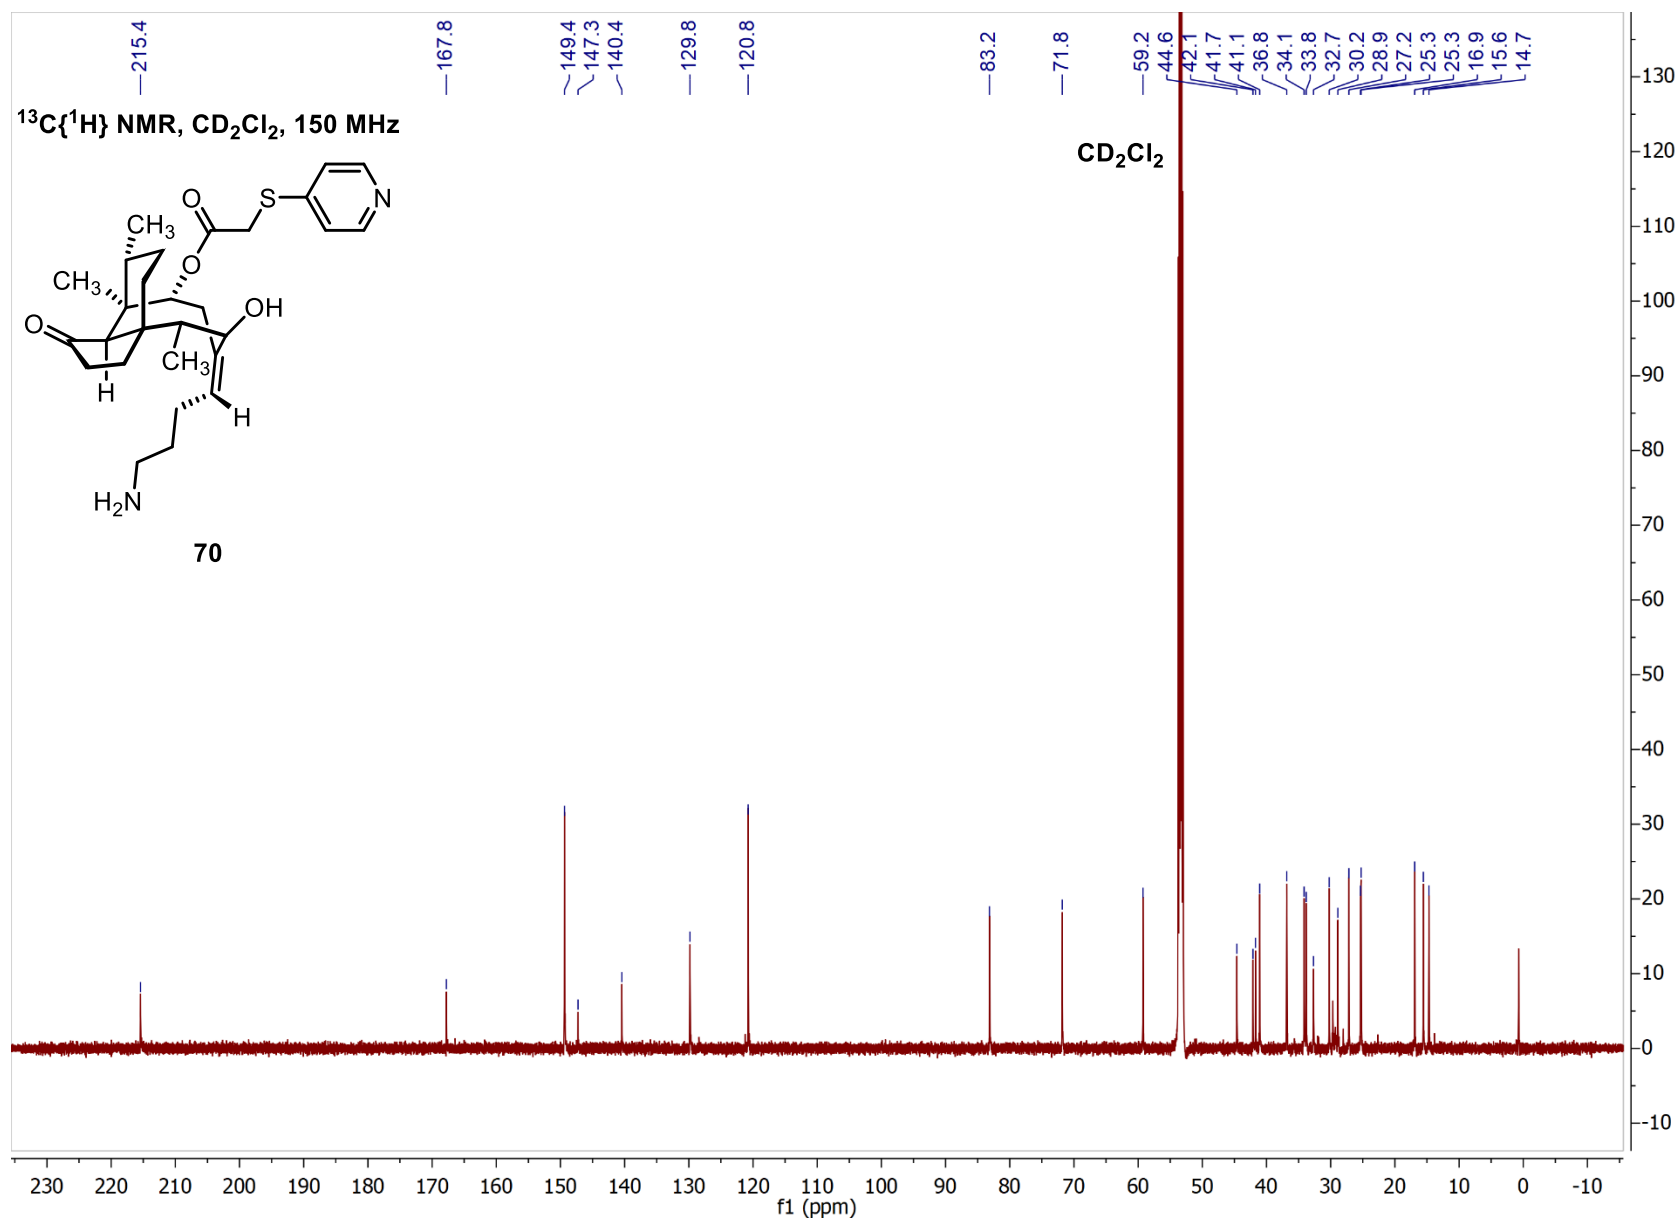

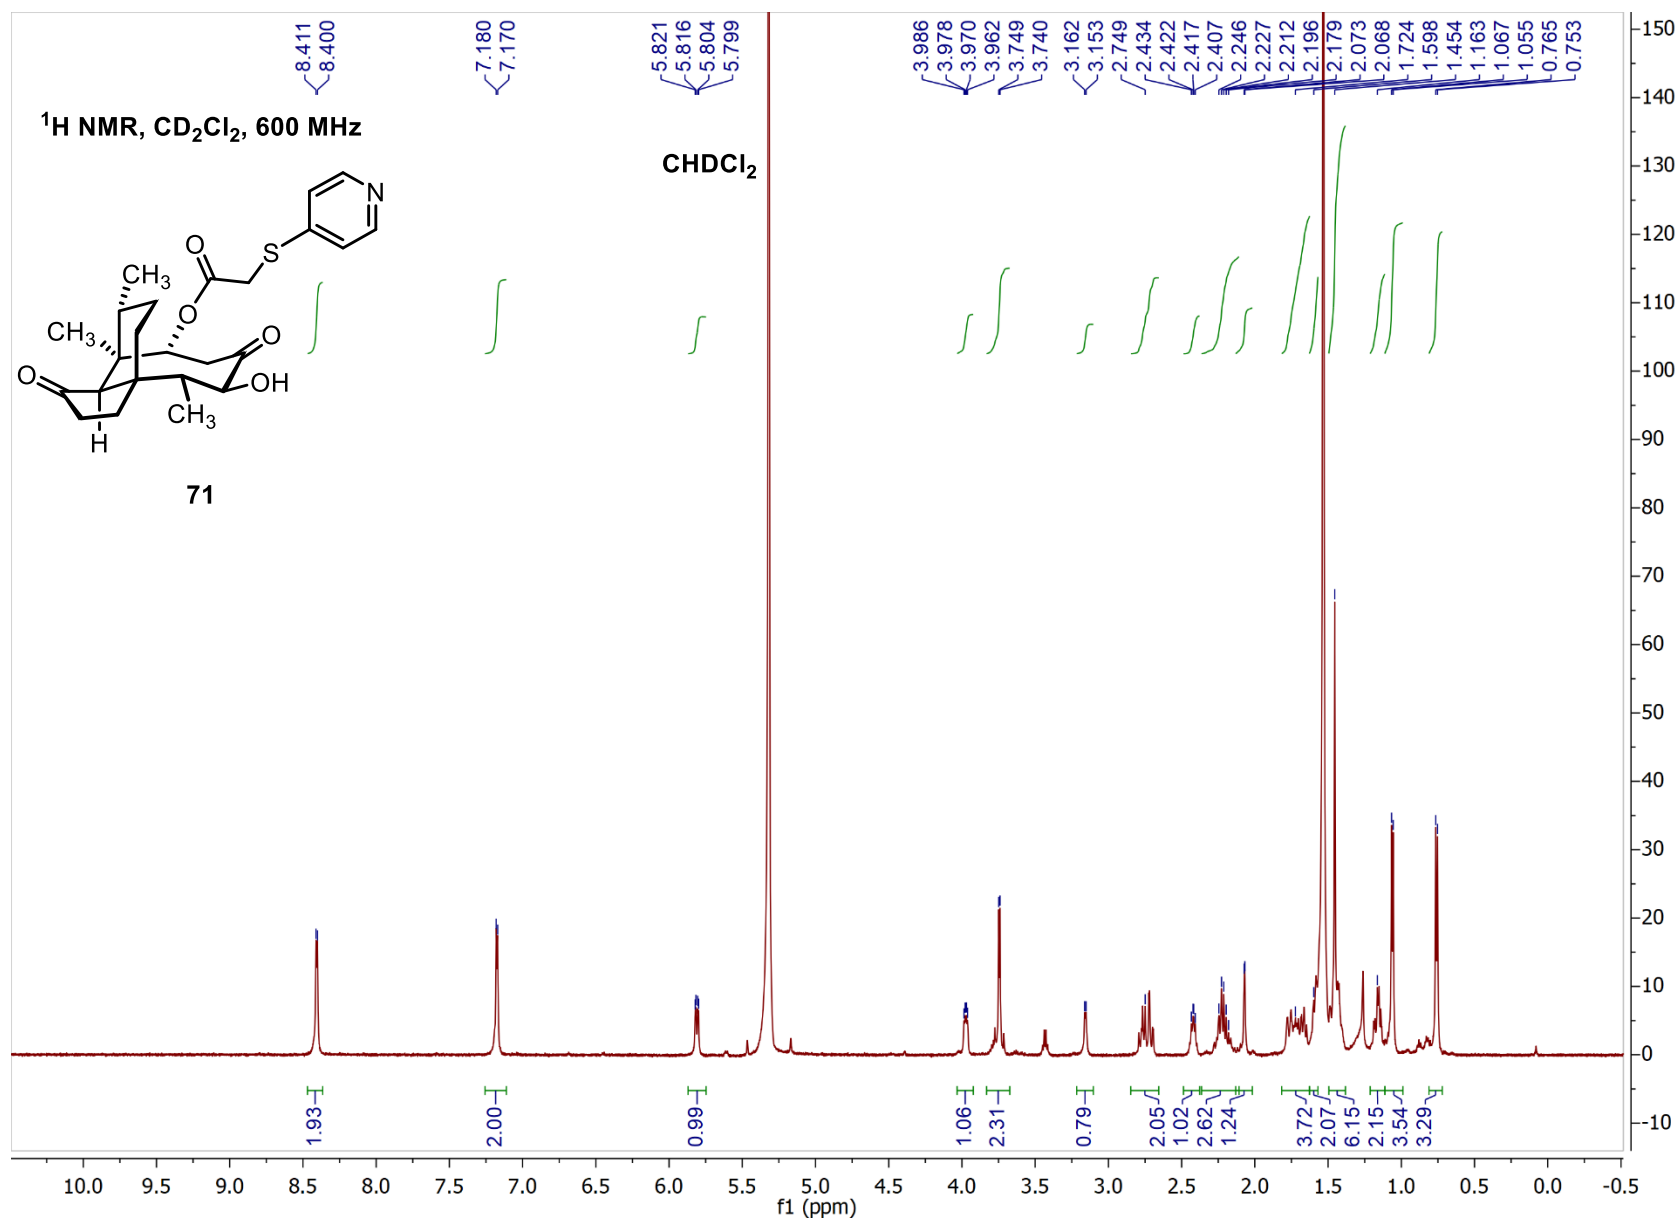

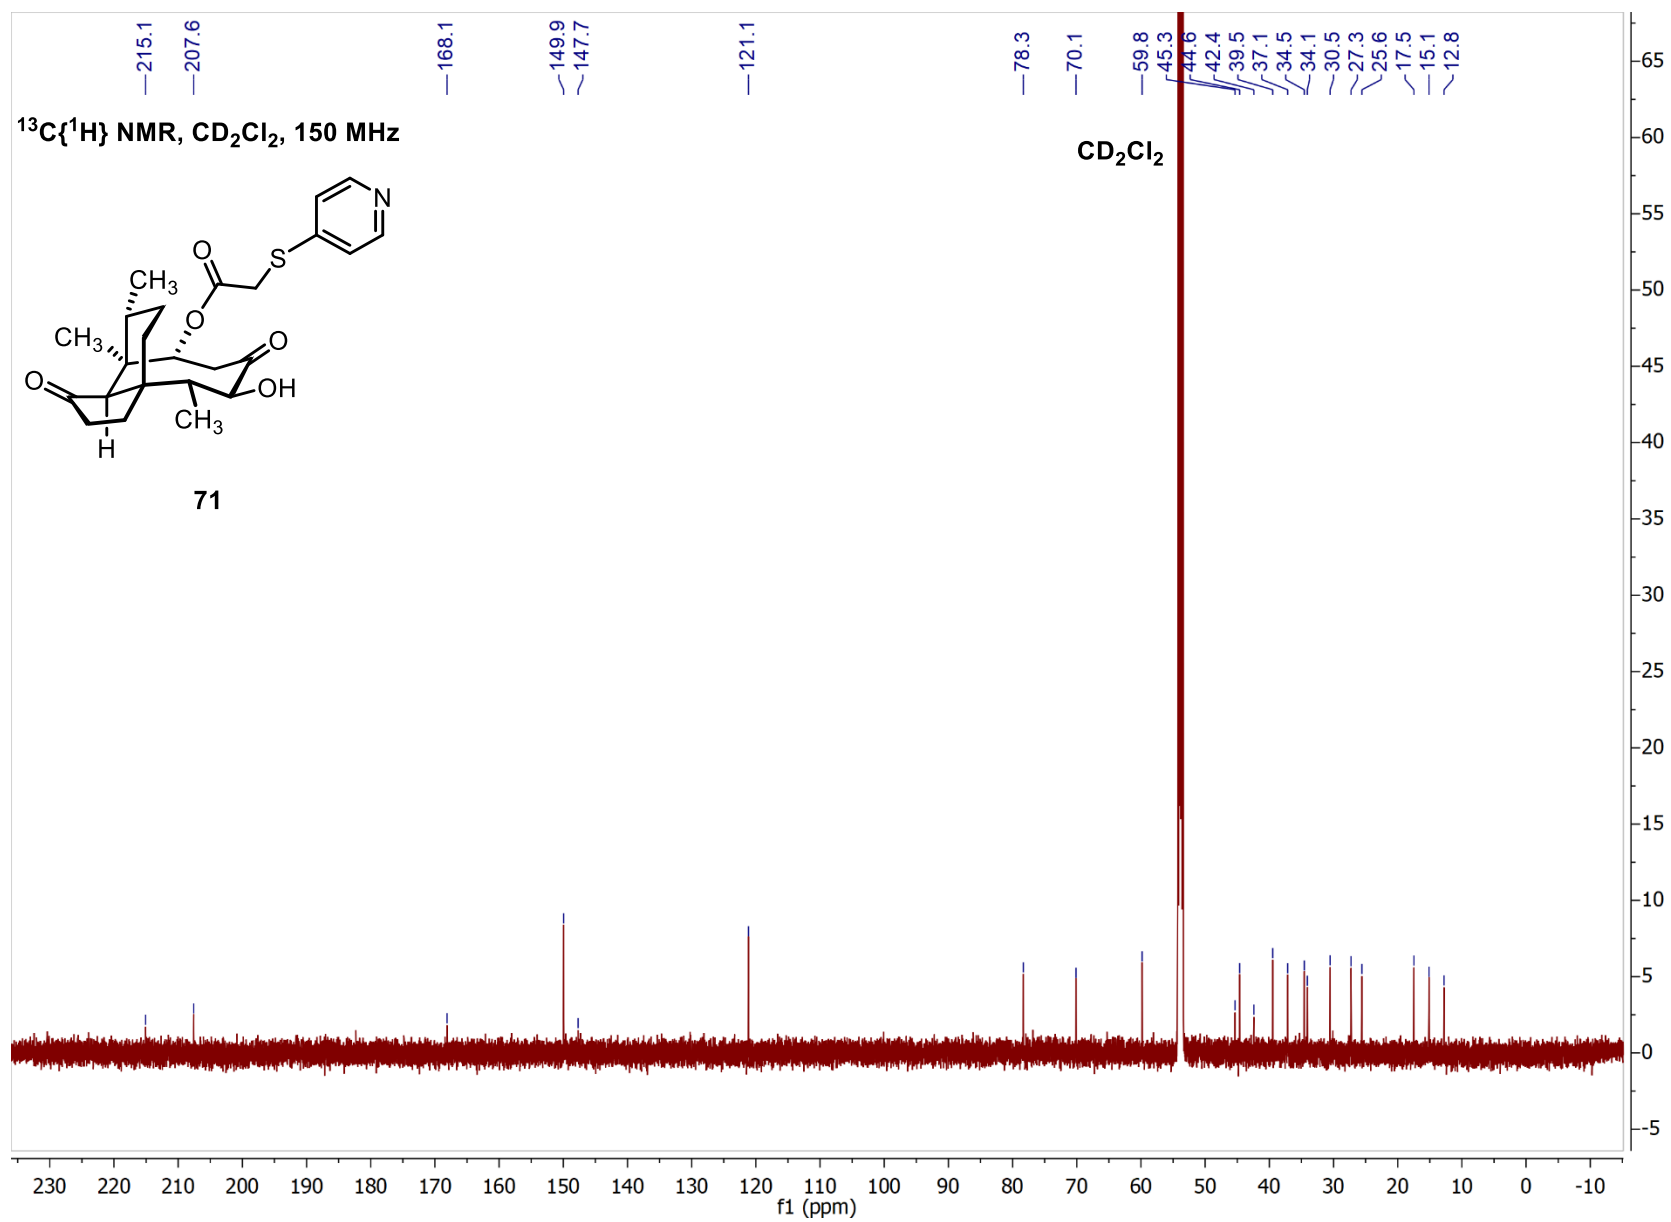

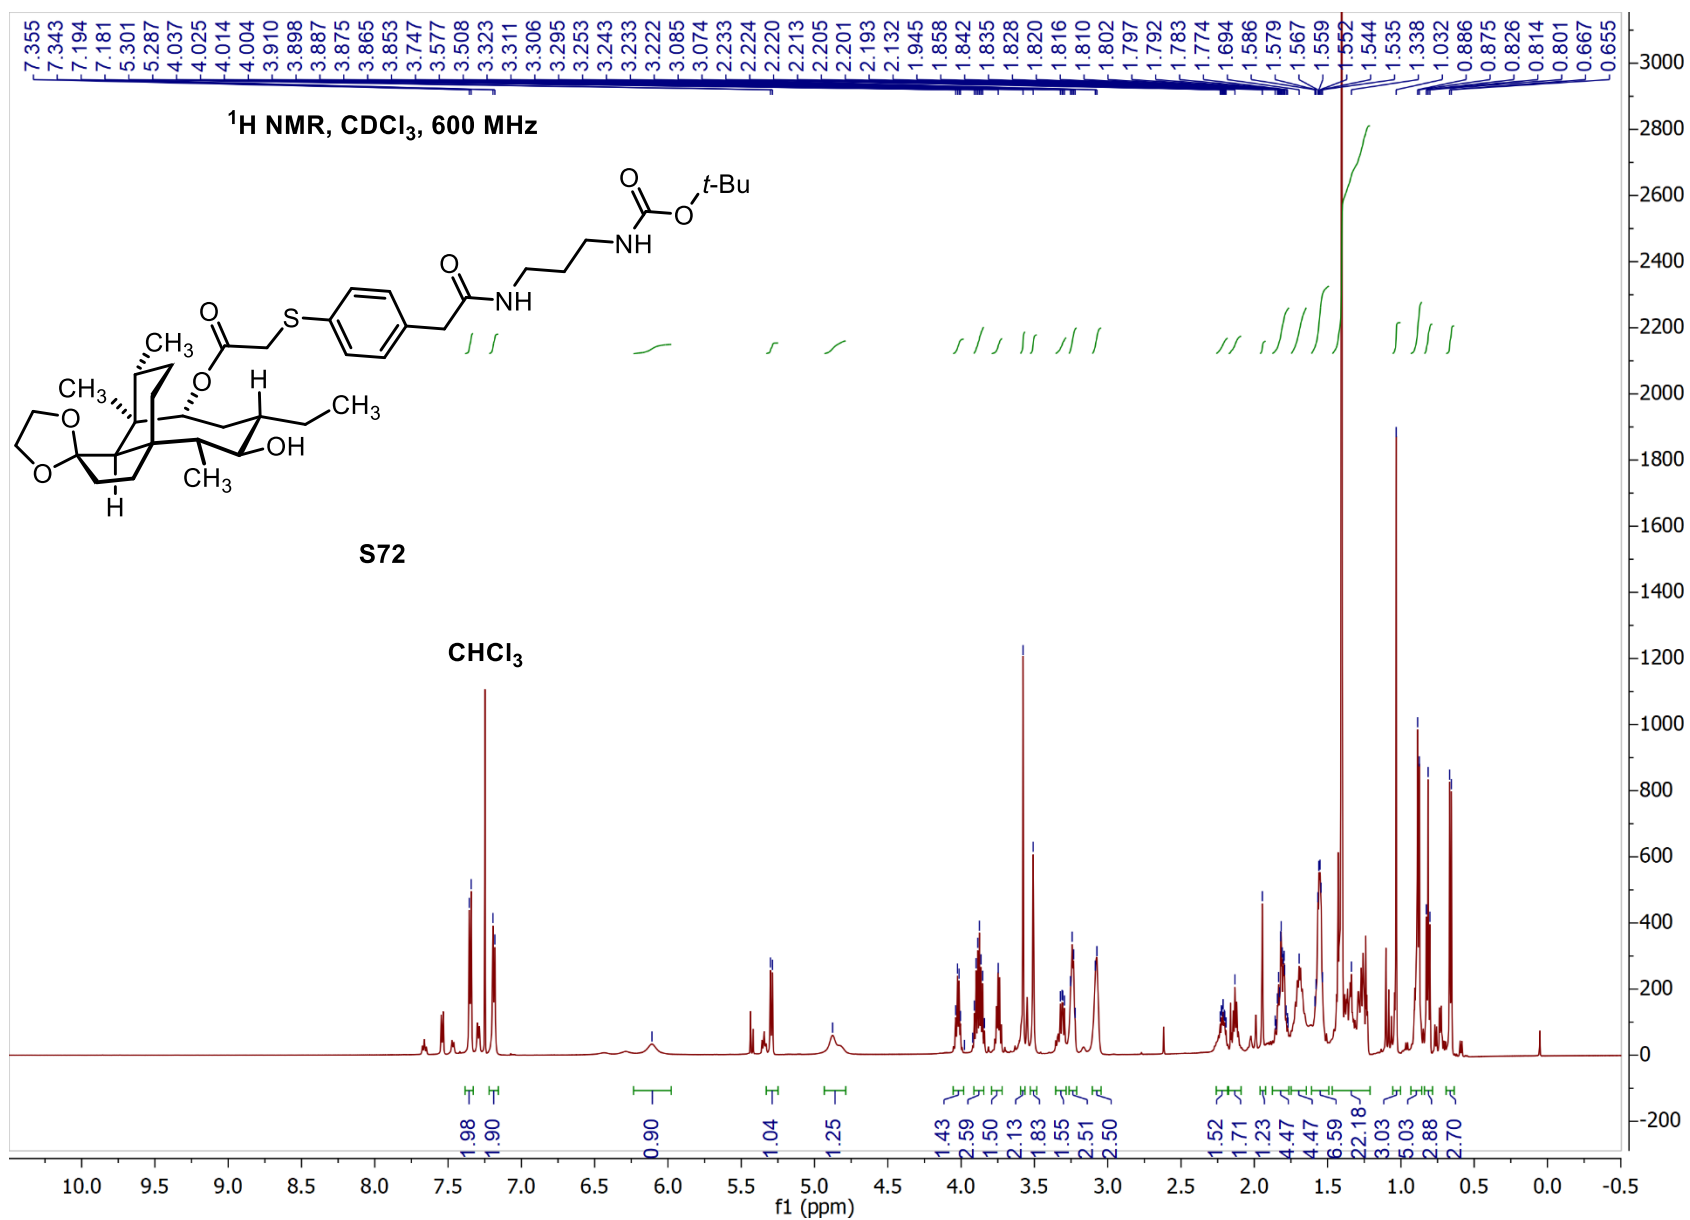

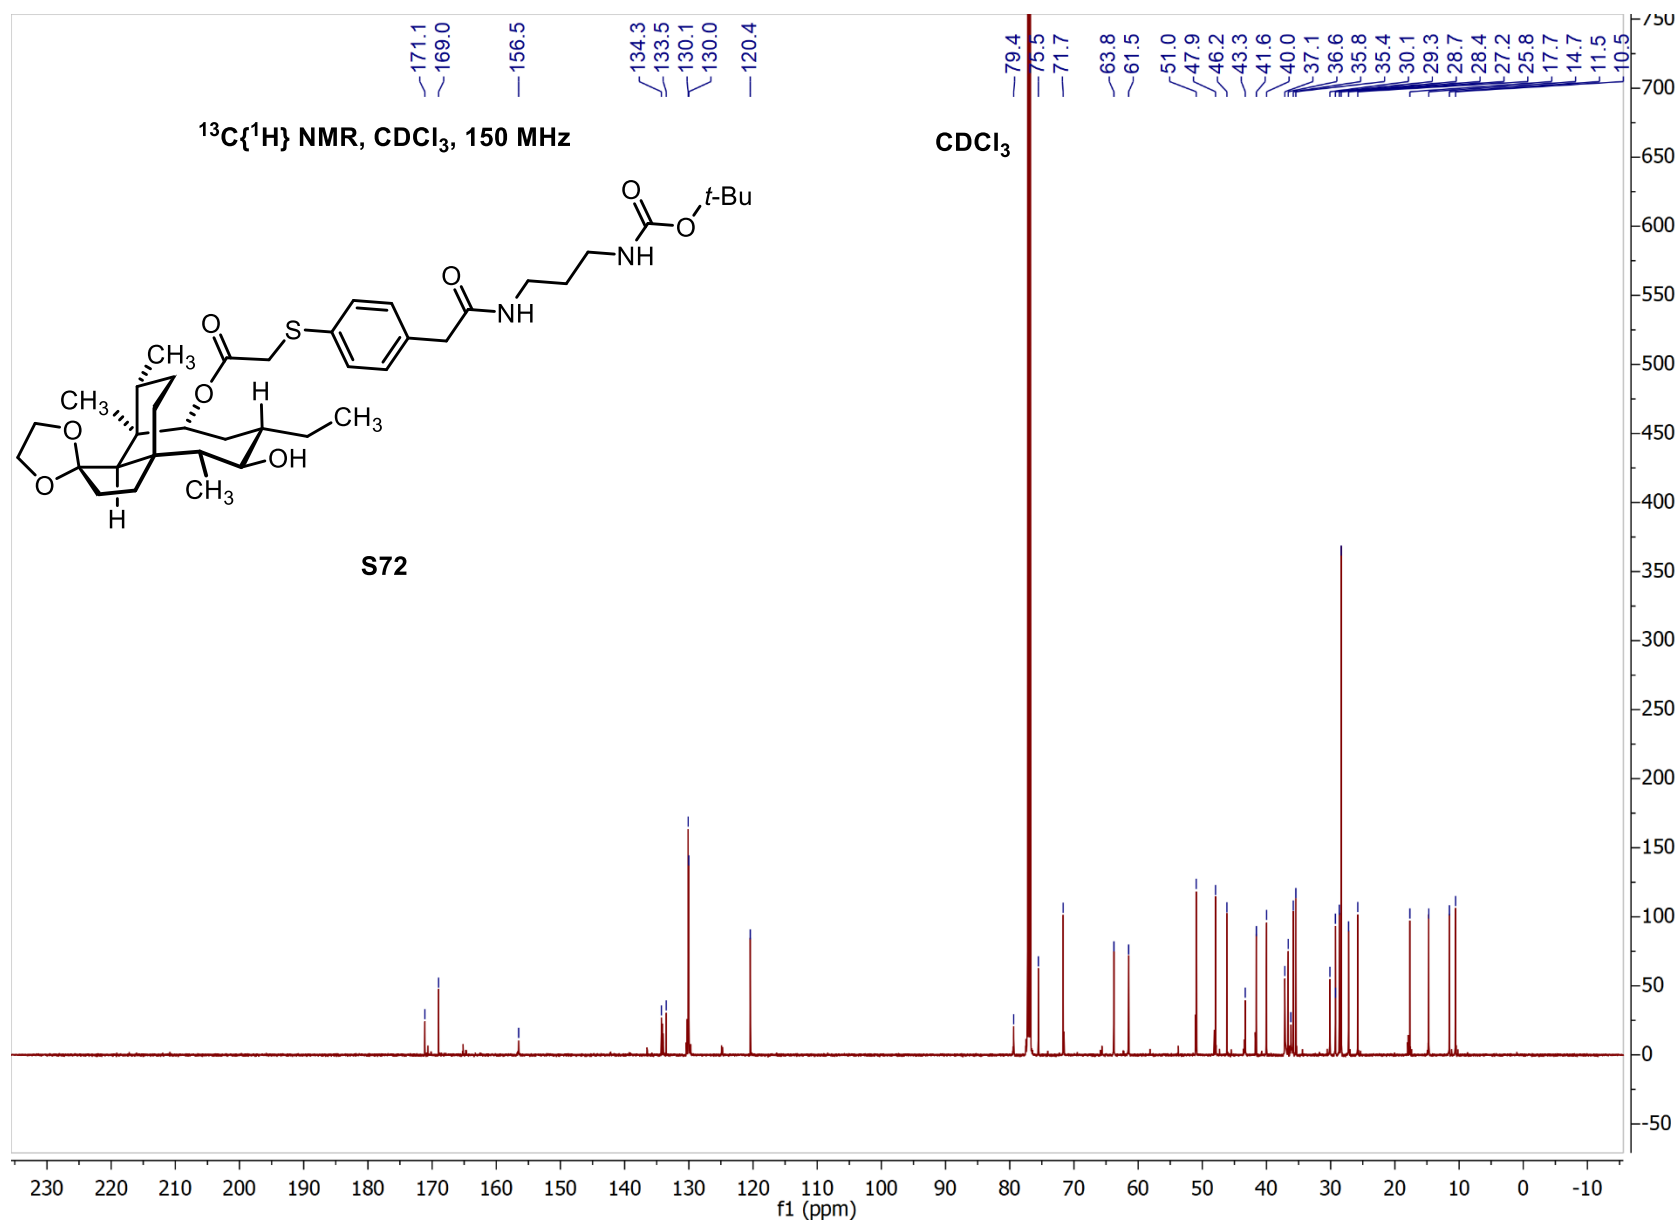

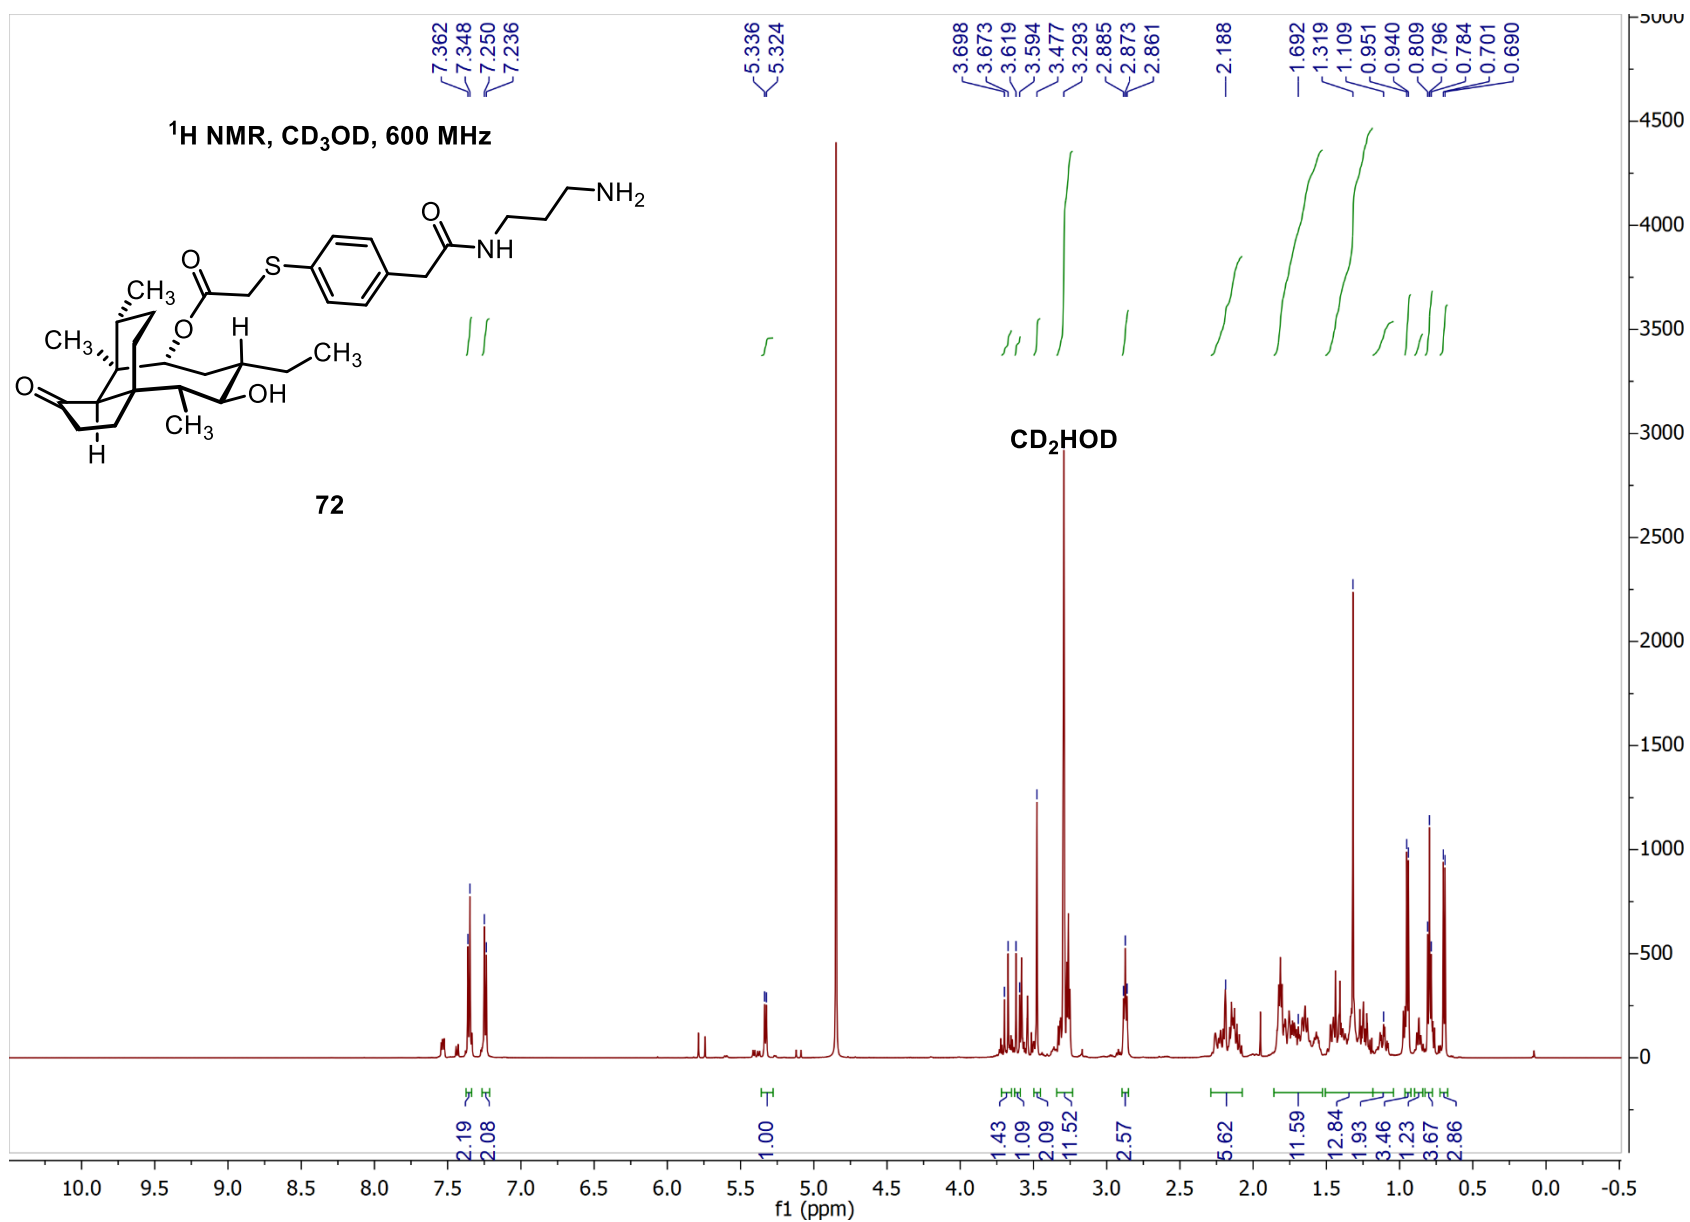

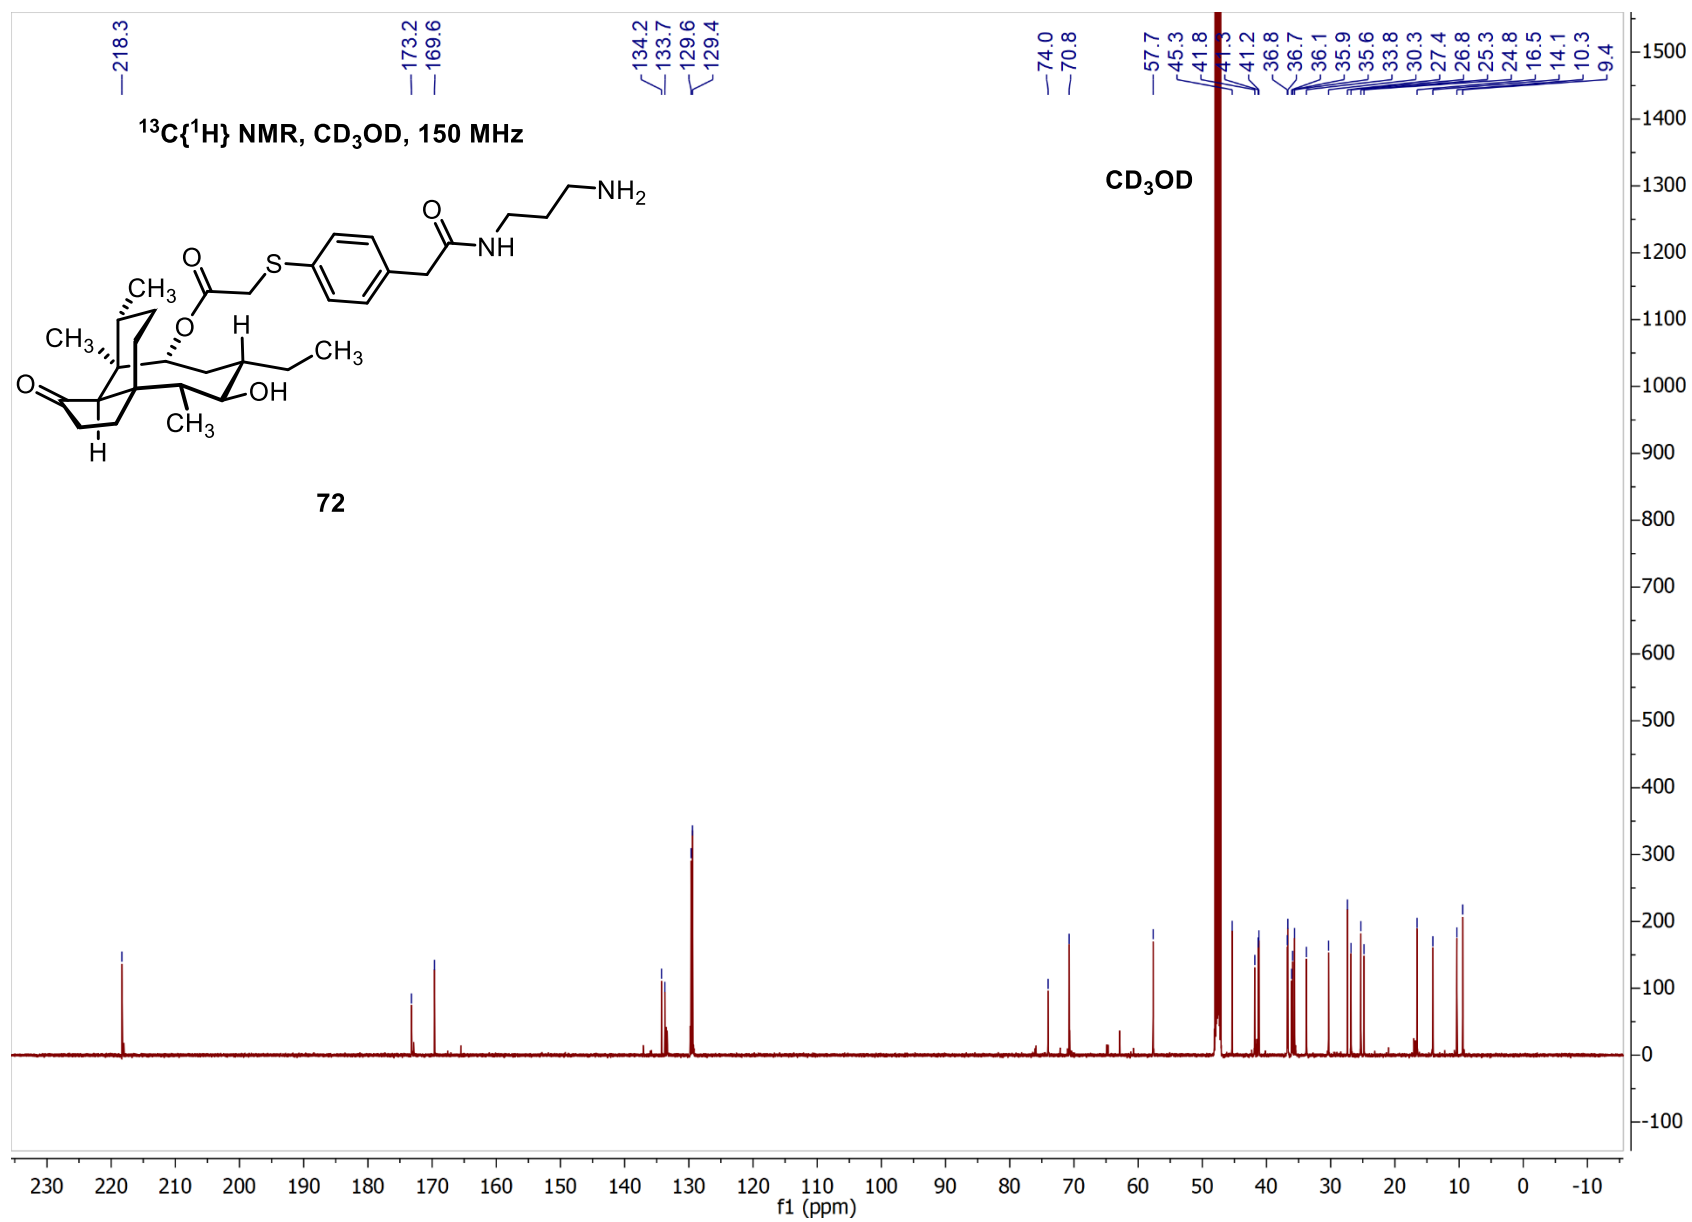



## Bibliography.

1. Still, W. C., Kahn, M. & Mitra, A. Rapid chromatographic technique for preparative separations with moderate resolution. *J. Org. Chem.* **43**, 2923-2925 (1975).
2. Pangborn, A. B., Giardello, M. A., Grubbs, R. H., Rosen, R. K. & Timmers, F. J. Safe and Convenient Procedure for Solvent Purification. *Organometallics* **15**, 1518-1520 (1996).
3. Lin, H.-S., Paquette, L. A. A Convenient Method for Determining the Concentration of Grignard Reagents. *Synth. Comm.* **24**, 2503-2506 (1994).
4. Arndt, F. Diazomethane. *Org. Synth.* **15**, 3 (1935).
5. Frigerio, M., Santagostino, M. & Sputore, S. A User-Friendly Entry to 2-Iodoxybenzoic Acid (IBX). *J. Org. Chem.* **64**, 4537-4538 (1999).
6. Acharya, H. P., Miyoshi, K. & Kobayashi, Y. Mercury-free preparation and selective reactions of propargyl (and propargylic) Grignard reagents. *Org. Lett.* **9**, 3535-8 (2007).
7. Bell, M. G. et al. Eli Lilly and Company. Pyrazole Derivatives Useful as Aldosterone Synthase Inhibitors. WO 2012/173849 A1 (2012).
8. Parmar, D., Matsubara, H., Price, K., Spain, M. & Procter, D. J. Lactone Radical Cyclizations and Cyclization Cascades Mediated by  $\text{SmI}_2\text{-H}_2\text{O}$ . *J. Am. Chem. Soc.* **134**, 12751-12757 (2012).
9. Hamze, A., Provot, O., Brion, J.-D. & Alami, M. Regiocontrol of the Palladium-Catalyzed Tin Hydride Addition to *Z*-Enynols: Remarkable *Z*-Directing Effects. *J. Org. Chem.* **72**, 3868-3874 (2007).
10. Dumez, E., Faure, R. & Dulcère, J.-P. Diastereoselective Access to 3-Nitro-4-vinylidenetetrahydrofurans and 3-Nitro-4-vinylidenetetrahydropyrans and Their Conversion into 3,6-Dihydro-1,2-oxazines by Reverse Cope Elimination of Hydroxylamine Precursors. *Eur. J. Org. Chem.* **13**, 2577-2588 (2001).
11. Banti, D., Groaz, E. & North, M. Ene-yne metathesis of polyunsaturated norbornene derivatives. *Tetrahedron* **60**, 8043-8052 (2004).
12. Murphy, S. K., Zeng, M. & Herzon, S. B. Scalable Synthesis of a Key Intermediate for the Production of Pleuromutilin-Based Antibiotics. *Org. Lett.* **19**, 4980-4983 (2017).
13. Wang, M., Gao, M., Miller, K. D. & Zheng, Q.-H. Synthesis of [ $^{11}\text{C}$ ]PBR06 and [ $^{18}\text{F}$ ]PBR06 as agents for positron emission tomographic (PET) imaging of the translocator protein (TSPO). *Steroids* **76**, 1331-1340 (2011).
14. Riedl, R. H., Heilmayer, W. & Spence, L. Nabriva Therapeutics. Process for the preparation for the preparation of Pleuromutilins. WO/2011/146954 (2011).
15. Marx, J. N. & Norman, L. R. Synthesis of (-)-acorone and related spirocyclic sesquiterpenes. *J. Org. Chem.* **40**, 1602-1606 (1975).
16. Ma, X., Kucera, R., Goethe, O. F., Murphy, S. K. & Herzon, S. B. Directed C-H Bond Oxidation of (+)-Pleuromutilin. *J. Org. Chem.* **83**, 6943-6892 (2018).
17. Jervis, P. J., Kariuki, B. M. & Cox, L. R. Stereoselective Synthesis of 2,4,5-Trisubstituted Tetrahydropyrans Using an Intramolecular Allylation Strategy. *Org. Lett.* **8**, 4649-4652 (2006).
18. Sommer, H., Hamilton, J. Y. & Fürstner, A. A Method for the Late-Stage Formation of Ketones, Acyloins, and Aldols from Alkenylstannanes: Application to the Total Synthesis of Paecilonic Acid A. *Angew. Chem. Int. Ed.* **56**, 6161-6165 (2017).
19. Thirring, K. et al. Nabriva Therapeutics. Preparation of 12-*epi*-Pleuromutilin Derivatives as Antimicrobial Agents. WO2015110481A1 (2015).

20. Clinical and Laboratory Standards Institute (CLSI). *Methods for Dilution Antimicrobial Susceptibility Tests for Bacteria That Grow Aerobically; Approved Standard*; 11th ed. CLSI, 950 West Valley Road, Suite 2500, Wayne, Pennsylvania 19087 USA (2018).
21. Clinical and Laboratory Standards Institute (CLSI). *Performance Standards for Antimicrobial Susceptibility Testing*; 30th ed. CLSI, 950 West Valley Road, Suite 2500, Wayne, Pennsylvania 19087, USA (2020).
